# Supplementary material for: Isolation and transcriptomic analysis of Anopheles gambiae oenocytes enables the delineation of hydrocarbon biosynthesis
Source: eLife. 2020 Jun 15;9:e58019. doi: 10.7554/eLife.58019 (PMC7351493; doi:10.7554/eLife.58019)
Supplement: Appendix 1—figure 1—source data 1. — Comparisons performed are: Female Oenocytes vs Female total Carcass cells (sheet 1), Male Oenocytes vs Male total Carcass cells (sheet 2) and Female Oenocytes vs Male Oenocytes (sheet 3). [file elife-58019-app1-fig1-data1.xlsx]

## Sheet: Information
Sheet 1: Frequency of each gene isoform in all samples (s01-03ACF=Female Oenocytes, s04-06ACM= Male Oenocytes, s07-09BCF=Female total carcass cells,s10-12BCM= Male total carcass cells)
Sheet 2: Differential expression of gene isoforms in the comparison Female Oenocytes vs Female total carcass cells
Sheet 3: Differential expression of gene isoforms in the comparison Male Oenocytes vs Male total carcass cells
Sheet 4:Differential expression of gene isoforms in the comparison Female Oenocytes vs Male Oenocytes
psi = percentage spliced-in: frequency of each isoform among all isoforms from that gene)
dpsi = differential psi in a given comparison
psi i and j = psi in the first and second terms of the comparison (dpsi = psi_i - psi_j)

## Sheet: Sheet 1
gene	isoform	Femmale Oenocyte 1	Femmale Oenocyte 2	Femmale Oenocyte 3	Male Oenocyte 1	Male Oenocyte 2	Male Oenocyte 3	Female Total Carcass cells 1	Female Total Carcass cells 2	Female Total Carcass cells 3	Male Total carcass cells 1	Male Total carcass cells 2	Male Total carcass cells 3
Anogam_AGAP004677	Anogam_AGAP004677-RA	0.216566	0.213831	0.185333	0.22325	0.270601	0.191894	0.510843	0.340726	0.364543	0.494334	0.529815	0.464113
Anogam_AGAP004677	Anogam_AGAP004677-RB	0.783434	0.786169	0.814667	0.77675	0.729399	0.808106	0.489157	0.659274	0.635457	0.505666	0.470185	0.535887
Anogam_AGAP004681	Anogam_AGAP004681-RA	1	1	1	1	1	1	nan	nan	nan	1	1	1
Anogam_AGAP004682	Anogam_AGAP004682-RA	1	1	1	1	1	1	1	1	1	1	1	1
Anogam_AGAP028431	Anogam_AGAP028431-RA	1	1	1	1	1	1	1	1	1	1	1	1
Anogam_AGAP004683	Anogam_AGAP004683-RA	1	1	1	1	1	1	1	1	1	1	1	1
Anogam_AGAP004685	Anogam_AGAP004685-RA	1	0.971689	1	1	1	0.925578	1	1	0.950315	0.961475	0.912907	0.908663
Anogam_AGAP004685	Anogam_AGAP004685-RB	0	0.0283111	0	0	0	0.0744216	0	0	0.0496847	0.0385247	0.0870926	0.091337
Anogam_AGAP004687	Anogam_AGAP004687-RA	nan	nan	nan	nan	nan	nan	nan	nan	nan	nan	nan	1
Anogam_AGAP028432	Anogam_AGAP028432-RA	1	1	1	1	1	1	1	1	1	1	1	1
Anogam_AGAP004688	Anogam_AGAP004688-RA	1	1	nan	nan	nan	1	1	nan	1	1	1	1
Anogam_AGAP004690	Anogam_AGAP004690-RA	1	1	1	1	1	1	1	1	1	1	1	1
Anogam_AGAP004691	Anogam_AGAP004691-RA	1	1	1	1	1	1	1	1	1	1	1	1
Anogam_AGAP004693	Anogam_AGAP004693-RA	1	1	1	1	1	1	1	1	1	1	1	1
Anogam_AGAP004694	Anogam_AGAP004694-RA	1	nan	1	nan	1	1	nan	1	1	1	1	1
Anogam_AGAP004696	Anogam_AGAP004696-RA	1	1	1	1	1	1	1	1	1	1	1	1
Anogam_AGAP004698	Anogam_AGAP004698-RA	1	1	1	1	1	1	1	1	1	1	1	1
Anogam_AGAP028436	Anogam_AGAP028436-RA	nan	1	1	nan	1	1	nan	1	nan	nan	1	nan
Anogam_AGAP004704	Anogam_AGAP004704-RA	1	1	1	1	1	1	1	1	1	1	1	1
Anogam_AGAP028437	Anogam_AGAP028437-RA	1	1	1	1	1	1	1	1	1	1	1	1
Anogam_AGAP004708	Anogam_AGAP004708-RA	1	1	1	1	1	1	1	1	1	1	1	1
Anogam_AGAP004710	Anogam_AGAP004710-RA	1	1	1	1	1	1	1	1	1	1	1	1
Anogam_AGAP004713	Anogam_AGAP004713-RA	1	nan	1	1	1	1	1	1	1	1	1	1
Anogam_AGAP004719	Anogam_AGAP004719-RA	1	1	nan	1	1	1	1	1	1	1	1	1
Anogam_AGAP004721	Anogam_AGAP004721-RA	1	1	1	1	1	1	1	1	1	1	1	1
Anogam_AGAP004722	Anogam_AGAP004722-RA	1	1	1	1	1	1	1	1	1	1	1	1
Anogam_AGAP004726	Anogam_AGAP004726-RA	1	1	1	1	1	1	nan	1	1	1	1	1
Anogam_AGAP004728	Anogam_AGAP004728-RA	nan	nan	1	nan	nan	nan	nan	nan	nan	1	1	1
Anogam_AGAP004729	Anogam_AGAP004729-RA	1	1	1	1	1	1	1	1	1	1	1	1
Anogam_AGAP004731	Anogam_AGAP004731-RA	1	1	1	1	1	1	1	1	1	1	1	1
Anogam_AGAP029113	Anogam_AGAP029113-RA	1	1	1	1	1	1	1	1	1	1	1	1
Anogam_AGAP004735	Anogam_AGAP004735-RA	1	1	1	1	1	1	1	1	1	1	1	1
Anogam_AGAP004738	Anogam_AGAP004738-RA	1	1	1	1	1	1	1	1	1	1	1	1
Anogam_AGAP004740	Anogam_AGAP004740-RA	nan	nan	nan	nan	1	1	nan	nan	nan	1	1	1
Anogam_AGAP004741	Anogam_AGAP004741-RA	nan	nan	1	1	nan	1	1	nan	nan	nan	1	nan
Anogam_AGAP004742	Anogam_AGAP004742-RA	0.508099	0.575711	0.637528	0.670713	0.692578	0.611579	0.314347	0.244555	0.284502	0.521575	0.636255	0.558173
Anogam_AGAP004742	Anogam_AGAP004742-RB	0.491901	0.424289	0.362472	0.329287	0.307422	0.388421	0.685653	0.755445	0.715498	0.478425	0.363745	0.441827
Anogam_AGAP004745	Anogam_AGAP004745-RA	0.999998	1	1	1	1	1	1	1	1	1	1	1
Anogam_AGAP004745	Anogam_AGAP004745-RB	1.92432e-06	0	0	0	0	0	0	0	0	0	0	0
Anogam_AGAP004747	Anogam_AGAP004747-RA	1	1	1	1	1	1	1	1	1	1	1	1
Anogam_AGAP004748	Anogam_AGAP004748-RA	1	1	1	1	1	1	1	1	1	1	1	1
Anogam_AGAP004750	Anogam_AGAP004750-RA	1	1	1	1	1	1	1	1	1	1	1	1
Anogam_AGAP004753	Anogam_AGAP004753-RB	0	0	0	0	0	0.162709	0	0	0	0	0	0
Anogam_AGAP004753	Anogam_AGAP004753-RA	1	1	1	1	1	0.837291	1	1	1	1	1	1
Anogam_AGAP004756	Anogam_AGAP004756-RA	1	1	1	1	1	1	1	1	1	1	1	1
Anogam_AGAP004758	Anogam_AGAP004758-RC	0.0753226	0.0873905	0.0454642	0.0795392	0.0655953	0.0551204	0.0638843	0.0484825	0.0845622	0.0622584	0.100593	0.0792212
Anogam_AGAP004758	Anogam_AGAP004758-RA	0.909493	0.912609	0.949069	0.917519	0.908522	0.939345	0.928295	0.919342	0.908757	0.914007	0.887688	0.91332
Anogam_AGAP004758	Anogam_AGAP004758-RB	0.015184	0	0.00546655	0.00294133	0.0258826	0.00553448	0.00782032	0.0321754	0.00668038	0.0237341	0.011719	0.00745847
Anogam_AGAP004760	Anogam_AGAP004760-RA	1	1	nan	nan	1	1	1	nan	nan	1	1	1
Anogam_AGAP004764	Anogam_AGAP004764-RA	1	1	1	1	1	1	1	1	1	1	1	1
Anogam_AGAP028129	Anogam_AGAP028129-RA	1	1	1	1	1	1	1	1	1	1	1	1
Anogam_AGAP004767	Anogam_AGAP004767-RA	1	1	1	1	1	1	1	1	1	1	1	1
Anogam_AGAP004768	Anogam_AGAP004768-RA	1	1	1	1	0.999967	1	1	1	1	1	1	1
Anogam_AGAP004768	Anogam_AGAP004768-RB	0	0	0	0	3.33875e-05	0	0	0	0	0	0	0
Anogam_AGAP004770	Anogam_AGAP004770-RA	1	1	1	1	1	1	1	1	1	1	1	1
Anogam_AGAP004771	Anogam_AGAP004771-RA	1	1	1	1	1	1	1	1	1	1	1	1
Anogam_AGAP004772	Anogam_AGAP004772-RA	1	1	1	1	1	1	1	1	1	1	1	1
Anogam_AGAP004775	Anogam_AGAP004775-RB	0.0529122	0.194293	0.0271095	0.0395502	0.117963	0.0897089	0.154993	0.128883	0.173877	0.0634815	0.0977158	0.233538
Anogam_AGAP004775	Anogam_AGAP004775-RA	0.947088	0.805707	0.97289	0.96045	0.882037	0.910291	0.845007	0.871117	0.826123	0.936519	0.902284	0.766462
Anogam_AGAP004777	Anogam_AGAP004777-RA	1	1	1	1	1	1	1	1	1	1	1	1
Anogam_AGAP004780	Anogam_AGAP004780-RA	1	1	1	1	1	1	1	1	1	1	1	1
Anogam_AGAP004781	Anogam_AGAP004781-RA	1	1	1	1	1	1	1	1	1	1	1	1
Anogam_AGAP004782	Anogam_AGAP004782-RA	1	1	1	1	1	1	1	1	1	1	1	1
Anogam_AGAP004783	Anogam_AGAP004783-RA	1	1	1	1	1	1	1	1	1	1	1	1
Anogam_AGAP028999	Anogam_AGAP028999-RA	nan	nan	nan	1	nan	1	nan	nan	nan	nan	nan	nan
Anogam_AGAP028301	Anogam_AGAP028301-RA	nan	nan	nan	nan	nan	1	nan	nan	nan	nan	nan	nan
Anogam_AGAP004787	Anogam_AGAP004787-RA	1	1	1	1	1	1	1	1	1	1	1	1
Anogam_AGAP004789	Anogam_AGAP004789-RA	1	1	1	1	1	1	1	1	1	1	1	1
Anogam_AGAP004791	Anogam_AGAP004791-RA	nan	nan	nan	nan	nan	nan	nan	nan	nan	nan	nan	nan
Anogam_AGAP004795	Anogam_AGAP004795-RA	1	1	1	1	1	1	1	1	1	1	1	1
Anogam_AGAP004797	Anogam_AGAP004797-RA	1	1	1	1	1	1	1	1	1	1	1	1
Anogam_AGAP004798	Anogam_AGAP004798-RA	1	1	1	1	1	1	1	1	1	1	1	1
Anogam_AGAP004799	Anogam_AGAP004799-RA	1	nan	nan	1	1	1	1	1	1	1	1	1
Anogam_AGAP004800	Anogam_AGAP004800-RA	1	1	1	1	1	1	1	1	1	1	1	1
Anogam_AGAP004803	Anogam_AGAP004803-RA	1	1	1	1	1	1	1	1	1	1	1	1
Anogam_AGAP004806	Anogam_AGAP004806-RA	1	1	1	1	1	1	1	1	1	1	1	1
Anogam_AGAP004808	Anogam_AGAP004808-RA	1	1	1	1	1	1	1	1	1	1	1	1
Anogam_AGAP004809	Anogam_AGAP004809-RA	1	1	1	1	1	1	1	1	1	1	1	1
Anogam_AGAP004810	Anogam_AGAP004810-RA	1	1	1	1	1	1	1	1	1	1	1	1
Anogam_AGAP004812	Anogam_AGAP004812-RA	1	1	1	1	1	1	1	1	1	1	1	1
Anogam_AGAP004815	Anogam_AGAP004815-RA	1	1	1	1	1	1	nan	nan	nan	1	1	1
Anogam_AGAP004816	Anogam_AGAP004816-RA	1	1	1	1	1	1	1	1	1	1	1	1
Anogam_AGAP004817	Anogam_AGAP004817-RA	1	1	1	1	1	1	1	1	1	1	1	1
Anogam_AGAP004819	Anogam_AGAP004819-RB	0.132005	0.0216382	0.148572	0.106399	0.0780658	0.136691	0.159736	0.122181	0.107154	0.0746767	0.0649167	0.0589048
Anogam_AGAP004819	Anogam_AGAP004819-RA	0.0653373	0.0653385	0.149514	0.0945622	0.10972	0.109559	0.0774161	0.0369095	0.055395	0.0348892	0.0433113	0.0424742
Anogam_AGAP004819	Anogam_AGAP004819-RC	0.802657	0.913023	0.701914	0.799039	0.812214	0.753749	0.762848	0.840909	0.837451	0.890434	0.891772	0.898621
Anogam_AGAP004823	Anogam_AGAP004823-RA	1	1	1	1	1	1	1	1	1	1	1	1
Anogam_AGAP004824	Anogam_AGAP004824-RA	1	1	1	1	1	1	1	1	1	1	1	1
Anogam_AGAP004826	Anogam_AGAP004826-RA	1	1	1	1	1	1	1	1	1	1	1	1
Anogam_AGAP004829	Anogam_AGAP004829-RA	1	1	1	1	1	1	1	1	1	1	1	1
Anogam_AGAP004830	Anogam_AGAP004830-RA	1	1	1	1	1	1	1	1	1	1	1	1
Anogam_AGAP004830	Anogam_AGAP004830-RB	0	0	0	0	0	0	0	0	0	0	0	0
Anogam_AGAP004832	Anogam_AGAP004832-RA	nan	1	nan	1	nan	nan	1	nan	nan	1	1	1
Anogam_AGAP004834	Anogam_AGAP004834-RA	0.556896	1	nan	1	0.467784	8.28732e-06	0	0.721023	nan	1	5.66428e-05	2.57252e-06
Anogam_AGAP004834	Anogam_AGAP004834-RB	0.443104	0	nan	0	0.532216	0.999992	1	0.278977	nan	0	0.999943	0.999997
Anogam_AGAP004836	Anogam_AGAP004836-RA	1	1	1	1	1	1	1	1	1	1	1	1
Anogam_AGAP004837	Anogam_AGAP004837-RA	1	1	1	1	1	1	1	1	1	1	1	1
Anogam_AGAP004838	Anogam_AGAP004838-RA	1	1	1	1	1	1	1	1	1	1	1	1
Anogam_AGAP004840	Anogam_AGAP004840-RA	1	1	1	1	1	1	1	1	1	1	1	1
Anogam_AGAP004841	Anogam_AGAP004841-RA	1	1	1	1	1	1	1	1	1	1	1	1
Anogam_AGAP004844	Anogam_AGAP004844-RA	1	1	1	1	1	1	1	1	1	1	1	1
Anogam_AGAP004848	Anogam_AGAP004848-RA	1	1	1	1	1	1	1	1	1	1	1	1
Anogam_AGAP004850	Anogam_AGAP004850-RA	1	1	1	1	1	1	1	1	1	1	1	1
Anogam_AGAP004851	Anogam_AGAP004851-RA	1	1	1	1	1	1	1	1	1	1	1	1
Anogam_AGAP004852	Anogam_AGAP004852-RB	0.422334	0.468984	0.44149	0.437164	0.40875	0.446143	0.384457	0.484085	0.441605	0.29362	0.294869	0.326987
Anogam_AGAP004852	Anogam_AGAP004852-RA	0.577666	0.531016	0.55851	0.562836	0.59125	0.553857	0.615543	0.515915	0.558395	0.70638	0.705131	0.673013
Anogam_AGAP004853	Anogam_AGAP004853-RA	1	1	1	1	1	1	1	1	1	1	1	1
Anogam_AGAP029106	Anogam_AGAP029106-RA	1	nan	1	1	1	nan	1	1	1	1	1	1
Anogam_AGAP004859	Anogam_AGAP004859-RA	1	1	1	1	1	1	1	1	1	1	1	1
Anogam_AGAP004860	Anogam_AGAP004860-RA	1	nan	nan	1	1	1	1	1	1	1	1	1
Anogam_AGAP004861	Anogam_AGAP004861-RA	1	1	1	1	1	1	1	1	1	1	1	1
Anogam_AGAP004864	Anogam_AGAP004864-RA	1	1	1	1	1	1	1	1	1	1	1	1
Anogam_AGAP004865	Anogam_AGAP004865-RA	1	1	1	1	1	1	1	1	1	1	1	1
Anogam_AGAP004866	Anogam_AGAP004866-RA	1	1	1	1	1	1	1	1	1	1	1	1
Anogam_AGAP004868	Anogam_AGAP004868-RA	1	1	1	1	1	1	1	1	1	1	1	1
Anogam_AGAP004869	Anogam_AGAP004869-RA	1	1	1	1	1	1	1	1	1	1	1	1
Anogam_AGAP004872	Anogam_AGAP004872-RA	1	nan	nan	1	1	1	1	nan	nan	1	1	1
Anogam_AGAP004873	Anogam_AGAP004873-RA	1	1	1	1	1	1	1	1	1	1	1	1
Anogam_AGAP004874	Anogam_AGAP004874-RA	1	1	1	1	1	1	1	1	1	1	1	1
Anogam_AGAP004875	Anogam_AGAP004875-RA	nan	nan	1	1	1	1	nan	1	nan	nan	nan	nan
Anogam_AGAP004878	Anogam_AGAP004878-RA	nan	1	nan	1	nan	nan	1	1	1	1	1	1
Anogam_AGAP004882	Anogam_AGAP004882-RA	1	1	1	1	1	1	1	1	1	1	1	1
Anogam_AGAP004884	Anogam_AGAP004884-RA	1	1	1	1	1	1	1	1	1	1	1	1
Anogam_AGAP004886	Anogam_AGAP004886-RA	0.0294979	0.0544176	0.0489547	0.05205	0.0440441	0.0334837	0.0420729	0.0487014	0.0319262	0.0901156	0.0770516	0.128167
Anogam_AGAP004886	Anogam_AGAP004886-RB	0.970502	0.945582	0.951045	0.94795	0.955956	0.966516	0.957927	0.951299	0.968074	0.909884	0.922948	0.871833
Anogam_AGAP004887	Anogam_AGAP004887-RA	1	1	1	1	1	1	1	1	1	1	1	1
Anogam_AGAP004889	Anogam_AGAP004889-RA	1	1	1	1	1	1	1	1	1	1	1	1
Anogam_AGAP004891	Anogam_AGAP004891-RA	1	1	1	1	1	1	1	1	1	1	1	1
Anogam_AGAP004893	Anogam_AGAP004893-RA	nan	nan	1	nan	nan	nan	nan	nan	1	nan	1	1
Anogam_AGAP004894	Anogam_AGAP004894-RA	1	1	1	1	1	1	1	1	1	1	1	1
Anogam_AGAP004895	Anogam_AGAP004895-RA	1	nan	1	nan	1	1	nan	1	nan	1	1	1
Anogam_AGAP004896	Anogam_AGAP004896-RA	1	1	0	1	1	1	1	1	1	1	1	0.955336
Anogam_AGAP004896	Anogam_AGAP004896-RB	0	0	1	0	0	0	0	0	0	0	0	0.044664
Anogam_AGAP028438	Anogam_AGAP028438-RA	1	nan	nan	1	1	1	nan	1	1	1	1	1
Anogam_AGAP004900	Anogam_AGAP004900-RA	1	nan	1	1	1	1	1	1	1	1	1	1
Anogam_AGAP004901	Anogam_AGAP004901-RA	nan	nan	1	1	1	nan	nan	1	1	1	1	1
Anogam_AGAP004903	Anogam_AGAP004903-RA	1	1	1	1	1	1	1	1	1	1	1	1
Anogam_AGAP004908	Anogam_AGAP004908-RA	nan	nan	1	nan	1	1	nan	nan	1	nan	1	1
Anogam_AGAP004910	Anogam_AGAP004910-RA	1	1	1	1	1	1	1	1	1	1	1	1
Anogam_AGAP004911	Anogam_AGAP004911-RA	1	1	1	1	1	1	1	1	1	1	1	1
Anogam_AGAP004916	Anogam_AGAP004916-RA	1	1	1	1	1	1	1	1	1	1	1	1
Anogam_AGAP004917	Anogam_AGAP004917-RA	1	1	1	1	1	1	1	1	1	1	1	1
Anogam_AGAP004918	Anogam_AGAP004918-RA	1	1	1	1	1	1	1	1	1	1	1	1
Anogam_AGAP028439	Anogam_AGAP028439-RA	1	1	1	1	1	1	1	1	1	1	1	1
Anogam_AGAP004921	Anogam_AGAP004921-RA	1	1	nan	1	1	1	1	1	1	1	1	1
Anogam_AGAP004922	Anogam_AGAP004922-RA	nan	nan	nan	1	1	nan	1	1	1	1	1	1
Anogam_AGAP004923	Anogam_AGAP004923-RA	1	1	1	1	1	1	1	1	1	1	1	1
Anogam_AGAP004924	Anogam_AGAP004924-RA	nan	nan	1	1	nan	1	nan	1	nan	nan	1	1
Anogam_AGAP004925	Anogam_AGAP004925-RA	nan	nan	1	nan	1	1	nan	nan	nan	nan	1	1
Anogam_AGAP004928	Anogam_AGAP004928-RA	1	1	1	1	1	1	1	1	1	1	1	1
Anogam_AGAP004933	Anogam_AGAP004933-RA	1	1	1	1	1	1	1	1	1	1	1	1
Anogam_AGAP004934	Anogam_AGAP004934-RA	1	1	1	1	1	1	1	1	1	1	1	1
Anogam_AGAP004937	Anogam_AGAP004937-RA	1	1	1	1	1	1	1	1	1	1	1	1
Anogam_AGAP004938	Anogam_AGAP004938-RA	1	1	1	1	1	1	1	1	1	1	1	1
Anogam_AGAP004941	Anogam_AGAP004941-RA	nan	nan	nan	nan	1	nan	nan	nan	1	1	1	1
Anogam_AGAP004942	Anogam_AGAP004942-RA	1	1	1	1	1	1	1	1	1	1	1	1
Anogam_AGAP004944	Anogam_AGAP004944-RA	1	1	1	nan	1	1	1	1	1	1	1	1
Anogam_AGAP004945	Anogam_AGAP004945-RA	1	1	1	1	1	1	1	1	1	1	1	1
Anogam_AGAP004946	Anogam_AGAP004946-RA	1	1	1	1	1	1	1	1	1	1	1	1
Anogam_AGAP004948	Anogam_AGAP004948-RA	1	1	1	1	1	1	1	1	1	1	1	1
Anogam_AGAP004951	Anogam_AGAP004951-RA	nan	nan	nan	nan	nan	nan	nan	nan	nan	nan	nan	nan
Anogam_AGAP004953	Anogam_AGAP004953-RA	1	1	1	1	1	1	1	1	1	1	1	1
Anogam_AGAP004954	Anogam_AGAP004954-RA	1	1	1	1	1	1	1	1	1	1	1	1
Anogam_AGAP004956	Anogam_AGAP004956-RA	1	1	1	1	1	1	1	1	1	1	1	1
Anogam_AGAP004958	Anogam_AGAP004958-RA	1	1	1	1	1	1	1	1	1	1	1	1
Anogam_AGAP004960	Anogam_AGAP004960-RA	1	1	1	1	1	1	1	1	1	1	1	1
Anogam_AGAP004962	Anogam_AGAP004962-RA	1	1	1	1	1	1	1	1	1	1	1	1
Anogam_AGAP004964	Anogam_AGAP004964-RA	1	1	1	1	1	1	1	1	1	1	1	1
Anogam_AGAP004968	Anogam_AGAP004968-RA	1	1	nan	1	1	1	nan	1	1	1	1	1
Anogam_AGAP004972	Anogam_AGAP004972-RA	1	nan	1	nan	1	nan	nan	1	1	1	1	1
Anogam_AGAP004975	Anogam_AGAP004975-RA	1	1	1	nan	1	1	nan	1	nan	1	1	nan
Anogam_AGAP004976	Anogam_AGAP004976-RA	1	1	nan	1	1	1	1	nan	1	1	1	1
Anogam_AGAP004977	Anogam_AGAP004977-RA	1	1	1	1	1	1	1	1	1	1	1	1
Anogam_AGAP004978	Anogam_AGAP004978-RA	1	1	1	1	1	1	1	1	1	1	1	1
Anogam_AGAP004979	Anogam_AGAP004979-RA	nan	1	1	nan	nan	nan	nan	nan	nan	nan	nan	1
Anogam_AGAP004980	Anogam_AGAP004980-RA	1	1	1	nan	1	1	nan	nan	1	nan	1	1
Anogam_AGAP004981	Anogam_AGAP004981-RA	1	1	1	1	1	1	1	1	1	1	1	1
Anogam_AGAP004982	Anogam_AGAP004982-RA	1	1	1	1	1	1	1	1	1	1	1	1
Anogam_AGAP004983	Anogam_AGAP004983-RA	1	1	1	1	1	1	1	1	1	1	1	1
Anogam_AGAP004985	Anogam_AGAP004985-RA	1	1	1	1	1	1	1	1	1	1	1	1
Anogam_AGAP004989	Anogam_AGAP004989-RA	1	1	1	1	1	1	1	1	1	1	1	1
Anogam_AGAP004989	Anogam_AGAP004989-RB	0	0	0	0	0	0	0	0	0	0	0	0
Anogam_AGAP004991	Anogam_AGAP004991-RA	1	1	1	1	1	1	1	1	1	1	1	1
Anogam_AGAP004994	Anogam_AGAP004994-RA	1	1	nan	nan	nan	nan	nan	nan	1	1	nan	nan
Anogam_AGAP004995	Anogam_AGAP004995-RA	nan	1	1	1	1	1	1	1	1	1	nan	1
Anogam_AGAP004996	Anogam_AGAP004996-RA	nan	1	nan	nan	nan	nan	nan	1	nan	1	1	1
Anogam_AGAP004999	Anogam_AGAP004999-RA	nan	1	nan	nan	nan	nan	nan	nan	nan	nan	nan	1
Anogam_AGAP005001	Anogam_AGAP005001-RA	1	nan	1	nan	1	nan	nan	nan	nan	0	nan	0
Anogam_AGAP005001	Anogam_AGAP005001-RB	0	nan	0	nan	0	nan	nan	nan	nan	1	nan	1
Anogam_AGAP005002	Anogam_AGAP005002-RA	nan	0.736064	nan	nan	0.864034	0	nan	0	1	0.798131	1	1
Anogam_AGAP005002	Anogam_AGAP005002-RB	nan	0.263936	nan	nan	0.135966	1	nan	1	0	0.201869	0	0
Anogam_AGAP005003	Anogam_AGAP005003-RA	1	1	1	1	1	1	1	1	1	1	1	1
Anogam_AGAP005007	Anogam_AGAP005007-RA	1	1	1	1	1	1	1	1	1	1	1	1
Anogam_AGAP005008	Anogam_AGAP005008-RA	0.834539	0.857622	0.767866	0.835793	0.909437	0.905994	0.686077	0.693048	0.720247	0.74229	0.74209	0.625309
Anogam_AGAP005008	Anogam_AGAP005008-RB	0.165461	0.142378	0.232134	0.164207	0.0905628	0.094006	0.313923	0.306952	0.279753	0.25771	0.25791	0.374691
Anogam_AGAP005013	Anogam_AGAP005013-RA	1	1	1	1	1	1	1	1	1	1	1	1
Anogam_AGAP005015	Anogam_AGAP005015-RA	1	1	1	1	1	1	1	1	1	1	1	1
Anogam_AGAP028754	Anogam_AGAP028754-RA	1	nan	nan	nan	nan	1	nan	nan	nan	nan	nan	nan
Anogam_AGAP005018	Anogam_AGAP005018-RA	1	1	1	1	1	1	1	1	1	1	1	1
Anogam_AGAP005020	Anogam_AGAP005020-RA	1	1	1	1	1	1	1	1	1	1	1	1
Anogam_AGAP005021	Anogam_AGAP005021-RA	1	1	1	1	1	1	1	1	1	1	1	1
Anogam_AGAP005023	Anogam_AGAP005023-RA	1	1	1	nan	1	1	1	1	1	1	1	1
Anogam_AGAP005025	Anogam_AGAP005025-RA	1	nan	1	1	1	nan	1	1	1	1	1	1
Anogam_AGAP005027	Anogam_AGAP005027-RA	1	1	1	1	1	1	1	1	1	1	1	1
Anogam_AGAP005030	Anogam_AGAP005030-RA	1	1	1	1	1	1	1	1	1	1	1	1
Anogam_AGAP005031	Anogam_AGAP005031-RA	1	0.984929	1	0.952488	0.921371	0.891107	1	0.971574	0.942445	0.966324	0.959383	0.909219
Anogam_AGAP005031	Anogam_AGAP005031-RB	0	0.0150708	0	0.0475124	0.0786294	0.108893	0	0.0284262	0.0575553	0.0336761	0.0406173	0.0907813
Anogam_AGAP005033	Anogam_AGAP005033-RA	1	1	1	1	1	1	1	1	1	1	1	1
Anogam_AGAP005034	Anogam_AGAP005034-RA	1	1	1	1	1	1	1	1	1	1	1	1
Anogam_AGAP005035	Anogam_AGAP005035-RA	1	1	1	1	1	1	1	1	1	1	1	1
Anogam_AGAP005036	Anogam_AGAP005036-RA	1	1	1	1	1	1	1	1	1	1	1	1
Anogam_AGAP005037	Anogam_AGAP005037-RA	0	0	0.0488703	0	0.183538	0.133987	0	0.26556	0	0.433619	0.931935	0.602703
Anogam_AGAP005037	Anogam_AGAP005037-RB	1	1	0.95113	1	0.816462	0.866013	1	0.73444	1	0.566381	0.0680645	0.397297
Anogam_AGAP005039	Anogam_AGAP005039-RA	1	1	1	1	1	1	1	1	1	1	1	1
Anogam_AGAP005040	Anogam_AGAP005040-RA	1	1	1	1	1	1	1	1	1	1	1	1
Anogam_AGAP005041	Anogam_AGAP005041-RA	nan	1	1	1	1	nan	nan	1	1	1	1	1
Anogam_AGAP005043	Anogam_AGAP005043-RA	0	0.0583216	0.228376	0	0	0	0	0	0	0.0242467	0	0.027022
Anogam_AGAP005043	Anogam_AGAP005043-RB	1	0.941678	0.771624	1	1	1	1	1	1	0.975753	1	0.972978
Anogam_AGAP005044	Anogam_AGAP005044-RB	0.119138	0.0815968	0.265845	0.245657	0.277891	0.110074	2.73264e-05	0.155061	0.163531	0	0.287591	0
Anogam_AGAP005044	Anogam_AGAP005044-RA	0.880862	0.918403	0.734155	0.754343	0.722109	0.889926	0.999973	0.844939	0.836469	1	0.712409	1
Anogam_AGAP005047	Anogam_AGAP005047-RA	1	nan	nan	nan	nan	nan	nan	nan	1	1	1	1
Anogam_AGAP005049	Anogam_AGAP005049-RA	1	1	1	1	1	1	1	1	1	1	1	1
Anogam_AGAP005051	Anogam_AGAP005051-RA	1	1	1	1	1	1	1	1	1	1	1	1
Anogam_AGAP005053	Anogam_AGAP005053-RA	1	1	1	1	1	1	1	1	1	1	1	1
Anogam_AGAP005054	Anogam_AGAP005054-RA	0.608649	0.737376	0.695162	0.566512	0.772846	0.727295	0.592084	0.757124	0.855072	0.396247	0.770011	0.38061
Anogam_AGAP005054	Anogam_AGAP005054-RB	0.391351	0.262624	0.304838	0.433488	0.227154	0.272705	0.407916	0.242876	0.144928	0.603753	0.229989	0.61939
Anogam_AGAP005056	Anogam_AGAP005056-RA	1	1	1	1	1	1	1	1	1	1	1	1
Anogam_AGAP005059	Anogam_AGAP005059-RA	1	1	1	1	1	1	1	1	1	1	1	1
Anogam_AGAP005060	Anogam_AGAP005060-RA	1	1	1	1	1	1	1	1	1	1	1	1
Anogam_AGAP005063	Anogam_AGAP005063-RA	1	1	1	1	1	1	1	1	1	1	1	1
Anogam_AGAP028441	Anogam_AGAP028441-RA	nan	nan	nan	1	1	1	nan	nan	1	1	1	1
Anogam_AGAP005067	Anogam_AGAP005067-RA	nan	nan	nan	nan	nan	nan	nan	nan	nan	nan	nan	nan
Anogam_AGAP005068	Anogam_AGAP005068-RA	1	1	1	1	1	1	1	nan	1	1	1	1
Anogam_AGAP005070	Anogam_AGAP005070-RA	1	1	1	1	1	1	1	1	1	1	1	1
Anogam_AGAP005071	Anogam_AGAP005071-RB	0.0328274	0.12407	0.113293	0.0978624	0.18405	0.0728893	0.103517	0.0487613	0.0981248	0.305131	0.355792	0.431725
Anogam_AGAP005071	Anogam_AGAP005071-RA	0.967173	0.87593	0.886707	0.902138	0.81595	0.927111	0.896483	0.951239	0.901875	0.694869	0.644208	0.568275
Anogam_AGAP005072	Anogam_AGAP005072-RA	1	nan	1	1	1	1	1	nan	nan	1	1	1
Anogam_AGAP005080	Anogam_AGAP005080-RA	1	1	1	1	1	1	1	1	1	1	1	1
Anogam_AGAP005092	Anogam_AGAP005092-RA	1	nan	nan	nan	nan	nan	nan	1	nan	1	1	1
Anogam_AGAP005094	Anogam_AGAP005094-RA	nan	nan	nan	1	1	1	1	1	1	1	1	1
Anogam_AGAP005096	Anogam_AGAP005096-RA	nan	nan	nan	nan	nan	nan	nan	1	nan	1	1	nan
Anogam_AGAP005098	Anogam_AGAP005098-RA	nan	nan	nan	1	1	1	nan	nan	nan	1	1	1
Anogam_AGAP005101	Anogam_AGAP005101-RA	1	1	1	1	1	1	1	1	1	1	1	1
Anogam_AGAP005102	Anogam_AGAP005102-RA	1	1	1	1	1	1	1	1	1	1	1	1
Anogam_AGAP005103	Anogam_AGAP005103-RA	1	1	1	1	1	1	1	1	1	1	1	1
Anogam_AGAP028443	Anogam_AGAP028443-RA	1	1	1	1	1	1	1	1	1	1	1	1
Anogam_AGAP005107	Anogam_AGAP005107-RA	1	1	1	1	1	1	1	1	1	1	1	1
Anogam_AGAP028444	Anogam_AGAP028444-RA	1	1	1	1	1	1	1	1	1	1	1	1
Anogam_AGAP005109	Anogam_AGAP005109-RA	1	1	1	1	1	1	1	1	1	1	1	1
Anogam_AGAP005113	Anogam_AGAP005113-RA	1	1	1	1	1	1	1	1	1	1	1	1
Anogam_AGAP005114	Anogam_AGAP005114-RB	0.919167	0.771895	0.534753	0.954392	0.804695	0.851323	0.637756	0.7414	0.750544	0.826504	0.780288	0.771692
Anogam_AGAP005114	Anogam_AGAP005114-RA	0.0808333	0.228105	0.465247	0.0456082	0.195305	0.148677	0.362244	0.2586	0.249456	0.173496	0.219712	0.228308
Anogam_AGAP005115	Anogam_AGAP005115-RA	1	1	1	1	1	1	1	1	1	1	1	1
Anogam_AGAP005117	Anogam_AGAP005117-RA	1	1	1	1	1	1	1	1	1	1	1	1
Anogam_AGAP005119	Anogam_AGAP005119-RA	1	1	1	1	1	1	1	1	1	1	1	1
Anogam_AGAP005120	Anogam_AGAP005120-RA	1	1	1	1	1	1	1	1	1	1	1	1
Anogam_AGAP005122	Anogam_AGAP005122-RA	1	1	1	1	1	1	1	1	1	1	1	1
Anogam_AGAP005123	Anogam_AGAP005123-RA	1	1	1	1	1	1	1	1	1	1	1	1
Anogam_AGAP005124	Anogam_AGAP005124-RA	0.440174	0.265584	0.470728	0.371526	0.255349	0.356589	0.187899	0.2007	0.197823	0.167623	0.171994	0.184492
Anogam_AGAP005124	Anogam_AGAP005124-RB	0.378001	0.558025	0.391964	0.483403	0.571428	0.488095	0.600074	0.56012	0.519691	0.647469	0.644565	0.543307
Anogam_AGAP005124	Anogam_AGAP005124-RC	0.181825	0.176391	0.137309	0.145071	0.173223	0.155317	0.212027	0.239181	0.282485	0.184909	0.183441	0.272201
Anogam_AGAP005125	Anogam_AGAP005125-RA	1	1	1	1	1	1	1	1	1	1	1	1
Anogam_AGAP005126	Anogam_AGAP005126-RA	1	1	1	1	1	1	1	1	1	1	1	1
Anogam_AGAP005127	Anogam_AGAP005127-RA	1	1	1	1	1	1	1	1	1	1	1	1
Anogam_AGAP005129	Anogam_AGAP005129-RA	1	1	1	1	1	1	1	1	1	1	1	1
Anogam_AGAP005131	Anogam_AGAP005131-RA	1	1	1	1	1	1	1	1	1	1	1	1
Anogam_AGAP005133	Anogam_AGAP005133-RA	1	1	1	1	1	1	1	1	1	1	1	1
Anogam_AGAP005135	Anogam_AGAP005135-RA	1	1	1	1	1	1	1	1	1	1	1	1
Anogam_AGAP005137	Anogam_AGAP005137-RA	1	1	1	1	1	1	nan	nan	nan	1	1	1
Anogam_AGAP005138	Anogam_AGAP005138-RA	1	1	nan	1	1	1	1	1	nan	1	1	1
Anogam_AGAP005139	Anogam_AGAP005139-RA	1	1	1	1	1	1	1	1	1	1	1	1
Anogam_AGAP005143	Anogam_AGAP005143-RA	1	1	1	1	1	1	1	1	1	1	1	1
Anogam_AGAP005147	Anogam_AGAP005147-RB	0.170795	0.0978587	0.298848	0.15462	0	0.106913	0.221325	0.305361	0.407652	0.0200831	0.0622158	0.0404641
Anogam_AGAP005147	Anogam_AGAP005147-RA	0.829205	0.902141	0.701152	0.84538	1	0.893087	0.778675	0.694639	0.592348	0.979917	0.937784	0.959536
Anogam_AGAP005149	Anogam_AGAP005149-RA	1	1	1	1	1	1	1	1	1	1	1	1
Anogam_AGAP005150	Anogam_AGAP005150-RA	1	1	1	1	1	1	1	1	1	1	1	1
Anogam_AGAP005156	Anogam_AGAP005156-RA	1	1	1	1	1	1	1	1	1	1	1	1
Anogam_AGAP005158	Anogam_AGAP005158-RA	1	1	1	1	1	1	1	1	1	1	1	1
Anogam_AGAP005159	Anogam_AGAP005159-RA	1	1	1	1	1	1	1	1	1	1	1	1
Anogam_AGAP005160	Anogam_AGAP005160-RD	0.177041	0.187414	0.107853	0.154151	0.142659	0.175817	0.0868685	0.13464	0.132132	0.0993469	0.091003	0.141046
Anogam_AGAP005160	Anogam_AGAP005160-RE	0.573512	0.647001	0.599212	0.623986	0.64549	0.568457	0.559514	0.547027	0.620387	0.560964	0.585627	0.60361
Anogam_AGAP005160	Anogam_AGAP005160-RB	0.0950634	0.0668981	0.121515	0.097415	0.0818925	0.0991032	0.110341	0.0989831	0.0815876	0.136017	0.0992469	0.0998076
Anogam_AGAP005160	Anogam_AGAP005160-RA	0.0432262	0.0692508	0.0137744	0.0382524	0.0559242	0.00860297	0.0294288	0.0095808	0.00721992	0.0376884	0.0631177	0.0144795
Anogam_AGAP005160	Anogam_AGAP005160-RC	0.111157	0.0294362	0.157647	0.0861959	0.0740338	0.148019	0.213847	0.209768	0.158673	0.165983	0.161005	0.141057
Anogam_AGAP005162	Anogam_AGAP005162-RA	0.449184	0.355291	0.296631	0.202427	0.290065	0.300175	0.282862	0.450102	0.292328	0.408326	0.365603	0.437524
Anogam_AGAP005162	Anogam_AGAP005162-RB	0.550816	0.644709	0.703369	0.797573	0.709935	0.699825	0.717138	0.549898	0.707672	0.591674	0.634397	0.562476
Anogam_AGAP005164	Anogam_AGAP005164-RA	1	1	1	1	1	1	1	1	1	1	1	1
Anogam_AGAP005165	Anogam_AGAP005165-RA	1	1	1	1	1	1	1	1	1	1	1	1
Anogam_AGAP005170	Anogam_AGAP005170-RA	1	1	1	1	1	1	1	1	1	1	1	1
Anogam_AGAP005171	Anogam_AGAP005171-RA	nan	nan	1	1	nan	1	1	1	1	1	1	1
Anogam_AGAP005173	Anogam_AGAP005173-RA	1	1	1	1	1	1	1	1	1	1	1	1
Anogam_AGAP005174	Anogam_AGAP005174-RA	1	1	1	1	1	1	1	1	1	1	1	1
Anogam_AGAP005178	Anogam_AGAP005178-RA	1	1	1	1	1	1	1	1	1	1	1	1
Anogam_AGAP005180	Anogam_AGAP005180-RA	1	1	1	1	1	1	1	1	1	1	1	1
Anogam_AGAP005181	Anogam_AGAP005181-RA	nan	1	nan	1	nan	1	nan	1	1	1	1	1
Anogam_AGAP005183	Anogam_AGAP005183-RA	1	1	1	1	1	1	1	1	1	1	1	1
Anogam_AGAP005189	Anogam_AGAP005189-RA	1	1	1	1	1	1	1	1	1	1	1	1
Anogam_AGAP005190	Anogam_AGAP005190-RA	1	1	1	1	1	1	1	1	1	1	1	1
Anogam_AGAP005192	Anogam_AGAP005192-RA	1	1	1	1	1	1	1	1	1	1	1	1
Anogam_AGAP005194	Anogam_AGAP005194-RA	1	1	1	1	1	1	1	1	1	nan	1	1
Anogam_AGAP005195	Anogam_AGAP005195-RA	1	nan	1	nan	1	nan	1	1	nan	1	1	1
Anogam_AGAP005196	Anogam_AGAP005196-RA	1	1	1	1	nan	1	1	1	nan	1	1	1
Anogam_AGAP005197	Anogam_AGAP005197-RA	1	1	1	1	1	1	1	1	1	1	1	1
Anogam_AGAP005199	Anogam_AGAP005199-RA	0.92173	0.902202	0.894522	0.897854	0.881765	0.96187	0.884447	0.709104	0.822385	0.757675	0.69143	0.630875
Anogam_AGAP005199	Anogam_AGAP005199-RB	0.0782699	0.0977983	0.105478	0.102146	0.118235	0.0381298	0.115553	0.290896	0.177615	0.242325	0.30857	0.369125
Anogam_AGAP005200	Anogam_AGAP005200-RA	1	1	1	1	1	1	1	1	1	1	1	1
Anogam_AGAP005201	Anogam_AGAP005201-RA	1	1	1	1	1	1	1	1	1	1	1	1
Anogam_AGAP005203	Anogam_AGAP005203-RC	0.196768	0.174062	0.175646	0.177641	0.241229	0.196515	0.23017	0.200529	0.260933	0.269588	0.268353	0.218212
Anogam_AGAP005203	Anogam_AGAP005203-RJ	0.0103603	0.0163002	0.00321334	0.012589	0.026512	0.0203853	0.0134755	0.00959721	0.0173108	0.0207705	0.0122508	0.0196675
Anogam_AGAP005203	Anogam_AGAP005203-RD	0.124212	0.122891	0.126402	0.171593	0.147662	0.106245	0.224419	0.312199	0.293301	0.278109	0.35687	0.317892
Anogam_AGAP005203	Anogam_AGAP005203-RH	0	0	0	0	0	0	0	0	0	0	0	0
Anogam_AGAP005203	Anogam_AGAP005203-RE	0	0	0	0	0	0	0	0	0	0	0	0
Anogam_AGAP005203	Anogam_AGAP005203-RF	0.193903	0.152411	0.161229	0.168821	0.182343	0.178614	0.205144	0.21839	0.217575	0.214765	0.18947	0.252096
Anogam_AGAP005203	Anogam_AGAP005203-RA	0.474757	0.534335	0.53351	0.469356	0.402254	0.49824	0.326791	0.259285	0.21088	0.216767	0.173056	0.192132
Anogam_AGAP005203	Anogam_AGAP005203-RB	0	0	0	0	0	0	0	0	0	0	0	0
Anogam_AGAP005205	Anogam_AGAP005205-RC	0.0288701	0.103361	0.0203303	0.0278977	0.042398	0.0432628	0.0488114	0.094308	0.0500327	0.0586336	0.0423014	0.0550427
Anogam_AGAP005205	Anogam_AGAP005205-RB	0.524119	0.445	0.678755	0.561137	0.581308	0.606516	0.504712	0.45442	0.3777	0.525305	0.470099	0.54016
Anogam_AGAP005205	Anogam_AGAP005205-RA	0.447011	0.451639	0.300915	0.410965	0.376294	0.350221	0.446477	0.451272	0.572267	0.416061	0.487599	0.404797
Anogam_AGAP005207	Anogam_AGAP005207-RA	1	1	1	1	1	1	1	1	1	1	1	1
Anogam_AGAP005209	Anogam_AGAP005209-RA	1	1	1	1	1	1	1	1	1	1	1	1
Anogam_AGAP005211	Anogam_AGAP005211-RA	1	1	1	1	1	1	1	1	1	1	1	1
Anogam_AGAP005213	Anogam_AGAP005213-RA	0.559149	0.895463	0.637849	1	0.576126	1	0.623925	0.481169	0.39304	0.436565	0.625136	0.739614
Anogam_AGAP005213	Anogam_AGAP005213-RD	0.250428	0.104537	0.362151	0	0.423874	0	0.224085	0.518831	0.60696	0.20571	0.0585416	0.222259
Anogam_AGAP005213	Anogam_AGAP005213-RF	0	0	0	0	0	0	0	0	0	0	0	0
Anogam_AGAP005213	Anogam_AGAP005213-RB	0.190423	0	0	0	0	0	0.15199	0	0	0.357725	0.316323	0.0381274
Anogam_AGAP005214	Anogam_AGAP005214-RA	nan	nan	nan	nan	nan	nan	nan	nan	nan	nan	nan	nan
Anogam_AGAP005215	Anogam_AGAP005215-RA	1	1	1	1	1	1	1	1	1	1	1	1
Anogam_AGAP005217	Anogam_AGAP005217-RA	1	1	1	1	1	1	nan	1	1	1	1	1
Anogam_AGAP005218	Anogam_AGAP005218-RA	1	1	1	1	1	1	1	1	1	1	1	1
Anogam_AGAP005220	Anogam_AGAP005220-RA	1	1	1	1	1	1	1	1	1	1	1	1
Anogam_AGAP005225	Anogam_AGAP005225-RA	1	1	1	1	1	1	1	1	1	1	1	1
Anogam_AGAP005226	Anogam_AGAP005226-RA	1	1	1	1	1	1	1	1	1	1	1	1
Anogam_AGAP013141	Anogam_AGAP013141-RA	1	1	1	1	1	1	1	1	1	1	1	1
Anogam_AGAP005228	Anogam_AGAP005228-RA	1	1	1	1	1	1	1	1	1	1	1	1
Anogam_AGAP005229	Anogam_AGAP005229-RA	1	1	1	1	1	1	nan	1	1	1	1	1
Anogam_AGAP005230	Anogam_AGAP005230-RA	1	1	1	1	1	1	1	1	1	1	1	1
Anogam_AGAP005231	Anogam_AGAP005231-RA	1	1	1	1	1	1	1	1	1	1	1	1
Anogam_AGAP005233	Anogam_AGAP005233-RA	1	1	1	nan	1	1	1	nan	1	1	1	1
Anogam_AGAP005234	Anogam_AGAP005234-RA	0.367448	0.208592	0.620765	0.480744	0.261388	0.38075	0.281136	0.395377	0.398916	0.357263	0.368137	0.411653
Anogam_AGAP005234	Anogam_AGAP005234-RB	0.632552	0.791408	0.379235	0.519256	0.738612	0.61925	0.718864	0.604623	0.601084	0.642737	0.631863	0.588347
Anogam_AGAP005235	Anogam_AGAP005235-RA	1	1	1	nan	1	1	1	1	1	1	1	1
Anogam_AGAP005236	Anogam_AGAP005236-RA	1	1	1	1	1	1	1	1	1	1	1	1
Anogam_AGAP005239	Anogam_AGAP005239-RA	1	1	1	1	1	1	1	1	1	1	1	1
Anogam_AGAP005243	Anogam_AGAP005243-RA	1	1	1	1	1	1	1	1	1	1	1	1
Anogam_AGAP005244	Anogam_AGAP005244-RB	0.628188	0.384124	0.505199	0.410981	0.284867	0.389823	0.655131	0.888204	0.805216	0.191225	0.265506	0.381076
Anogam_AGAP005244	Anogam_AGAP005244-RA	0.371812	0.615876	0.494801	0.589019	0.715133	0.610177	0.344869	0.111796	0.194784	0.808775	0.734494	0.618924
Anogam_AGAP005246	Anogam_AGAP005246-RE	0.344531	0.383725	0.350497	0.375928	0.413308	0.409791	0.34701	0.40043	0.347526	0.422042	0.379141	0.438094
Anogam_AGAP005246	Anogam_AGAP005246-RC	0.0813556	0.0875957	0.0698923	0.0779798	0.0986667	0.0698016	0.0950903	0.0955825	0.123525	0.118687	0.10597	0.10245
Anogam_AGAP005246	Anogam_AGAP005246-RD	0.480853	0.418018	0.499843	0.463521	0.409895	0.438673	0.454858	0.386274	0.401119	0.369052	0.401225	0.368484
Anogam_AGAP005246	Anogam_AGAP005246-RA	0.0932611	0.110662	0.0797677	0.0825711	0.0781305	0.0817334	0.103042	0.117713	0.12783	0.0902193	0.113665	0.0909725
Anogam_AGAP005249	Anogam_AGAP005249-RA	1	1	1	1	1	1	1	1	1	1	1	1
Anogam_AGAP005252	Anogam_AGAP005252-RA	1	1	1	1	1	1	1	1	1	1	1	1
Anogam_AGAP005254	Anogam_AGAP005254-RA	0	0	nan	1	0	0	1	0	nan	1	1	nan
Anogam_AGAP005254	Anogam_AGAP005254-RB	1	1	nan	0	1	1	0	1	nan	0	0	nan
Anogam_AGAP005255	Anogam_AGAP005255-RA	1	1	1	1	1	1	1	1	1	1	1	1
Anogam_AGAP005256	Anogam_AGAP005256-RA	1	nan	1	1	1	nan	nan	1	1	nan	nan	nan
Anogam_AGAP005259	Anogam_AGAP005259-RA	1	1	1	1	1	1	1	1	1	1	1	1
Anogam_AGAP005260	Anogam_AGAP005260-RA	1	1	1	1	1	1	1	1	1	1	1	1
Anogam_AGAP005262	Anogam_AGAP005262-RA	1	1	1	1	1	1	1	1	1	1	1	1
Anogam_AGAP005264	Anogam_AGAP005264-RA	nan	1	1	nan	1	1	nan	1	1	1	1	1
Anogam_AGAP005265	Anogam_AGAP005265-RA	1	1	nan	nan	1	nan	nan	1	1	1	1	1
Anogam_AGAP005266	Anogam_AGAP005266-RA	1	1	nan	nan	1	nan	nan	nan	nan	1	nan	nan
Anogam_AGAP005268	Anogam_AGAP005268-RA	nan	nan	nan	nan	1	nan	nan	nan	nan	1	1	1
Anogam_AGAP005269	Anogam_AGAP005269-RA	1	1	1	1	1	1	1	1	1	1	1	1
Anogam_AGAP005270	Anogam_AGAP005270-RA	1	1	1	1	1	1	1	1	1	1	1	1
Anogam_AGAP005274	Anogam_AGAP005274-RA	1	1	1	1	1	1	1	1	1	1	1	1
Anogam_AGAP005277	Anogam_AGAP005277-RA	1	1	1	1	1	1	nan	nan	nan	1	1	1
Anogam_AGAP005281	Anogam_AGAP005281-RA	1	1	1	1	1	1	1	1	1	1	1	1
Anogam_AGAP005287	Anogam_AGAP005287-RA	1	1	1	1	1	1	1	1	1	1	1	1
Anogam_AGAP005290	Anogam_AGAP005290-RA	1	1	1	1	1	1	1	1	1	1	1	1
Anogam_AGAP005292	Anogam_AGAP005292-RA	1	1	1	1	1	1	1	1	1	1	1	1
Anogam_AGAP005295	Anogam_AGAP005295-RA	1	1	1	1	1	1	1	1	1	1	1	1
Anogam_AGAP005298	Anogam_AGAP005298-RA	1	1	1	1	1	1	1	1	1	1	1	1
Anogam_AGAP005300	Anogam_AGAP005300-RC	0.119936	0.185497	0.0905635	0.0537045	0.0691155	0.116697	0.145642	0.0285909	0.0958632	0.189486	0.0971366	0.135056
Anogam_AGAP005300	Anogam_AGAP005300-RA	0.161116	0.145497	0.141763	0.199967	0.315701	0.237712	0.127319	0.197992	0.211138	0.247843	0.328865	0.327342
Anogam_AGAP005300	Anogam_AGAP005300-RB	0.718948	0.669006	0.767673	0.746329	0.615184	0.645591	0.727039	0.773417	0.692999	0.562672	0.573998	0.537602
Anogam_AGAP005301	Anogam_AGAP005301-RA	1	1	1	1	1	1	1	1	nan	1	1	1
Anogam_AGAP005306	Anogam_AGAP005306-RA	1	1	1	1	1	1	1	1	1	1	1	1
Anogam_AGAP029009	Anogam_AGAP029009-RA	1	nan	1	nan	nan	1	nan	nan	nan	1	nan	1
Anogam_AGAP005308	Anogam_AGAP005308-RA	1	1	1	1	1	1	1	1	1	1	1	1
Anogam_AGAP005311	Anogam_AGAP005311-RA	nan	nan	nan	nan	1	nan	nan	1	1	1	1	1
Anogam_AGAP005312	Anogam_AGAP005312-RA	1	1	nan	1	nan	1	1	1	1	1	nan	1
Anogam_AGAP005314	Anogam_AGAP005314-RA	1	1	1	1	1	1	1	1	1	1	1	1
Anogam_AGAP005315	Anogam_AGAP005315-RA	1	1	1	1	1	1	1	1	1	1	1	1
Anogam_AGAP005316	Anogam_AGAP005316-RA	1	1	1	1	1	1	1	1	1	1	1	1
Anogam_AGAP005317	Anogam_AGAP005317-RA	1	1	1	1	1	1	1	1	1	1	1	1
Anogam_AGAP005318	Anogam_AGAP005318-RA	1	1	1	1	1	1	1	nan	1	1	1	1
Anogam_AGAP005321	Anogam_AGAP005321-RA	1	1	1	1	1	1	1	1	1	1	1	1
Anogam_AGAP005328	Anogam_AGAP005328-RA	nan	nan	nan	1	1	nan	1	1	nan	nan	1	1
Anogam_AGAP005329	Anogam_AGAP005329-RA	1	1	nan	1	1	nan	nan	nan	nan	1	1	1
Anogam_AGAP005330	Anogam_AGAP005330-RA	1	1	nan	nan	1	1	nan	1	nan	1	1	1
Anogam_AGAP005331	Anogam_AGAP005331-RA	1	1	1	1	1	1	1	1	1	1	1	1
Anogam_AGAP005335	Anogam_AGAP005335-RA	1	1	1	1	1	1	1	1	1	1	1	1
Anogam_AGAP005337	Anogam_AGAP005337-RA	nan	1	1	nan	nan	1	1	1	1	1	nan	nan
Anogam_AGAP005338	Anogam_AGAP005338-RA	1	1	1	1	1	1	1	1	1	1	1	1
Anogam_AGAP005339	Anogam_AGAP005339-RA	1	nan	nan	1	nan	1	nan	1	nan	1	nan	nan
Anogam_AGAP005340	Anogam_AGAP005340-RA	1	1	1	1	1	nan	1	1	1	1	1	1
Anogam_AGAP005341	Anogam_AGAP005341-RB	0.0282419	0.205451	0.109763	0.0705928	0.307722	0.048755	0	0.167349	0.0792024	0.0744374	0.142146	0.0585406
Anogam_AGAP005341	Anogam_AGAP005341-RA	0.971758	0.794549	0.890237	0.929407	0.692278	0.951245	1	0.832651	0.920798	0.925563	0.857854	0.941459
Anogam_AGAP005342	Anogam_AGAP005342-RA	1	1	1	1	1	1	1	1	1	1	1	1
Anogam_AGAP005343	Anogam_AGAP005343-RA	1	1	1	1	1	1	1	1	1	1	1	1
Anogam_AGAP005347	Anogam_AGAP005347-RA	1	1	1	1	1	1	1	1	1	1	1	1
Anogam_AGAP005348	Anogam_AGAP005348-RA	1	1	1	1	1	1	1	1	1	1	1	1
Anogam_AGAP005351	Anogam_AGAP005351-RA	1	1	1	1	1	1	1	1	1	1	1	1
Anogam_AGAP005353	Anogam_AGAP005353-RA	1	1	1	1	1	1	1	1	1	1	1	1
Anogam_AGAP005362	Anogam_AGAP005362-RA	1	1	1	1	1	1	1	1	1	1	1	1
Anogam_AGAP005363	Anogam_AGAP005363-RA	1	1	1	nan	1	1	1	1	1	1	1	1
Anogam_AGAP005365	Anogam_AGAP005365-RA	1	1	1	1	1	1	1	1	1	1	1	1
Anogam_AGAP005368	Anogam_AGAP005368-RA	1	nan	nan	nan	1	nan	nan	nan	nan	1	1	1
Anogam_AGAP005369	Anogam_AGAP005369-RA	0.196931	0.167009	0.258002	0.188734	0.172293	0.214682	0.177433	0.192034	0.206766	0.216713	0.128218	0.184837
Anogam_AGAP005369	Anogam_AGAP005369-RB	0.803069	0.832991	0.741998	0.811266	0.827707	0.785318	0.822567	0.807966	0.793234	0.783287	0.871782	0.815163
Anogam_AGAP005370	Anogam_AGAP005370-RA	1	1	nan	nan	1	1	1	1	1	1	nan	1
Anogam_AGAP005371	Anogam_AGAP005371-RA	1	nan	1	1	nan	nan	1	1	1	1	1	1
Anogam_AGAP005372	Anogam_AGAP005372-RA	1	1	1	1	1	1	1	1	1	1	1	1
Anogam_AGAP005373	Anogam_AGAP005373-RA	1	nan	nan	nan	1	1	1	1	nan	1	1	1
Anogam_AGAP005376	Anogam_AGAP005376-RA	1	1	1	1	1	1	1	1	1	1	1	1
Anogam_AGAP005378	Anogam_AGAP005378-RA	0.841662	1	1	1	0.772072	1	1	0.635351	0.574303	0.436376	0.388807	0.395992
Anogam_AGAP005378	Anogam_AGAP005378-RB	0.158338	0	0	0	0.227928	0	0	0.364649	0.402099	0.456202	0.48079	0.604008
Anogam_AGAP005378	Anogam_AGAP005378-RC	0	0	0	0	0	0	0	0	0.0235983	0.107422	0.130404	0
Anogam_AGAP005381	Anogam_AGAP005381-RA	0.130938	0.135973	0.24405	0.226359	0.267497	0.144418	0.315498	0.152953	0.0717832	0.268844	0.274385	0.200058
Anogam_AGAP005381	Anogam_AGAP005381-RB	0.492116	0.428934	0.184095	0.17591	0.28307	0.289608	0.469003	0.303612	0.150462	0.208028	0.280542	0.242831
Anogam_AGAP005381	Anogam_AGAP005381-RC	0.376946	0.435092	0.571855	0.59773	0.449432	0.565974	0.215499	0.543435	0.777755	0.523128	0.445074	0.557111
Anogam_AGAP005383	Anogam_AGAP005383-RA	1	nan	nan	1	nan	nan	1	1	1	1	1	1
Anogam_AGAP005384	Anogam_AGAP005384-RA	nan	nan	nan	1	1	nan	1	nan	1	1	1	1
Anogam_AGAP005385	Anogam_AGAP005385-RA	nan	nan	nan	1	1	1	nan	1	nan	1	1	1
Anogam_AGAP005387	Anogam_AGAP005387-RA	1	nan	nan	1	nan	nan	1	1	1	1	1	1
Anogam_AGAP005388	Anogam_AGAP005388-RA	1	1	1	nan	1	1	1	1	1	1	1	1
Anogam_AGAP005389	Anogam_AGAP005389-RA	1	nan	nan	nan	1	1	1	nan	1	1	1	nan
Anogam_AGAP005390	Anogam_AGAP005390-RA	nan	1	nan	nan	nan	nan	nan	0.399095	nan	0.971666	0.920299	0.23063
Anogam_AGAP005390	Anogam_AGAP005390-RB	nan	0	nan	nan	nan	nan	nan	0.600905	nan	0.0283343	0.0797011	0.76937
Anogam_AGAP005392	Anogam_AGAP005392-RA	1	1	1	1	1	1	1	1	1	1	1	1
Anogam_AGAP005394	Anogam_AGAP005394-RA	1	1	1	1	1	1	1	1	1	1	1	1
Anogam_AGAP005401	Anogam_AGAP005401-RA	1	1	1	1	1	1	1	1	1	1	1	1
Anogam_AGAP005403	Anogam_AGAP005403-RA	1	1	nan	nan	1	nan	1	1	nan	1	nan	nan
Anogam_AGAP005404	Anogam_AGAP005404-RA	1	1	1	1	1	1	1	1	1	1	1	1
Anogam_AGAP005405	Anogam_AGAP005405-RA	1	1	1	1	1	1	1	1	1	1	1	1
Anogam_AGAP005406	Anogam_AGAP005406-RA	1	1	1	1	1	1	1	1	1	1	1	1
Anogam_AGAP005408	Anogam_AGAP005408-RA	1	1	1	1	1	1	1	1	1	1	1	1
Anogam_AGAP005409	Anogam_AGAP005409-RA	1	1	1	1	1	1	1	1	1	1	1	1
Anogam_AGAP005411	Anogam_AGAP005411-RB	0.208864	0.637763	0.109728	0.492559	0.223535	0.362339	0.208828	0.210698	0.247279	0.194456	0.131955	0.178903
Anogam_AGAP005411	Anogam_AGAP005411-RA	0.791136	0.362237	0.890272	0.507441	0.776465	0.637661	0.791172	0.789302	0.752721	0.805544	0.868045	0.821097
Anogam_AGAP005412	Anogam_AGAP005412-RA	nan	nan	nan	1	1	1	nan	1	nan	1	1	1
Anogam_AGAP005414	Anogam_AGAP005414-RA	1	1	1	1	1	1	1	1	1	1	1	1
Anogam_AGAP005418	Anogam_AGAP005418-RA	1	1	1	1	1	1	1	1	1	1	1	1
Anogam_AGAP005420	Anogam_AGAP005420-RA	1	1	1	1	1	1	1	1	1	1	1	1
Anogam_AGAP005422	Anogam_AGAP005422-RA	1	1	1	1	1	1	1	1	1	1	1	1
Anogam_AGAP005424	Anogam_AGAP005424-RA	1	nan	1	1	1	1	1	1	1	1	1	1
Anogam_AGAP013197	Anogam_AGAP013197-RA	1	1	1	1	1	1	1	1	1	1	1	1
Anogam_AGAP005425	Anogam_AGAP005425-RA	1	1	1	1	1	1	1	1	1	1	1	1
Anogam_AGAP005428	Anogam_AGAP005428-RA	1	1	1	1	1	1	1	1	1	1	1	1
Anogam_AGAP005430	Anogam_AGAP005430-RA	1	1	1	1	1	1	1	1	1	1	1	1
Anogam_AGAP005432	Anogam_AGAP005432-RA	1	1	1	1	1	1	1	1	1	1	1	1
Anogam_AGAP005434	Anogam_AGAP005434-RA	1	1	1	1	1	1	1	1	1	1	1	1
Anogam_AGAP028445	Anogam_AGAP028445-RA	1	nan	1	1	1	1	nan	1	1	1	1	1
Anogam_AGAP005437	Anogam_AGAP005437-RA	1	1	1	1	1	1	1	1	1	1	1	1
Anogam_AGAP005440	Anogam_AGAP005440-RA	1	1	1	1	1	1	1	1	1	1	1	1
Anogam_AGAP005444	Anogam_AGAP005444-RA	1	1	1	1	1	1	1	1	1	1	1	1
Anogam_AGAP005445	Anogam_AGAP005445-RA	1	1	1	1	1	1	1	1	1	1	1	1
Anogam_AGAP005448	Anogam_AGAP005448-RA	1	1	1	1	1	1	1	1	1	1	1	1
Anogam_AGAP005449	Anogam_AGAP005449-RA	0.337062	0.375016	0.370175	0.508489	0.497481	0.544582	0.317096	0.043234	0.279982	0.108084	0.121166	0.101498
Anogam_AGAP005449	Anogam_AGAP005449-RB	0.662938	0.624984	0.629825	0.491511	0.502519	0.455418	0.682904	0.956766	0.720018	0.891916	0.878834	0.898502
Anogam_AGAP005450	Anogam_AGAP005450-RA	nan	nan	1	1	1	1	nan	1	1	1	1	1
Anogam_AGAP028446	Anogam_AGAP028446-RA	1	1	1	1	1	1	1	1	1	1	1	1
Anogam_AGAP005453	Anogam_AGAP005453-RA	nan	nan	nan	nan	nan	nan	nan	nan	nan	nan	nan	nan
Anogam_AGAP005457	Anogam_AGAP005457-RA	nan	nan	nan	nan	nan	nan	nan	1	nan	nan	1	nan
Anogam_AGAP005458	Anogam_AGAP005458-RA	nan	nan	nan	nan	nan	nan	nan	1	nan	nan	1	nan
Anogam_AGAP005461	Anogam_AGAP005461-RA	1	1	1	1	1	1	1	1	1	1	1	1
Anogam_AGAP005463	Anogam_AGAP005463-RA	nan	nan	nan	1	1	1	nan	1	nan	1	1	1
Anogam_AGAP005466	Anogam_AGAP005466-RA	nan	nan	nan	nan	nan	nan	nan	nan	nan	nan	1	nan
Anogam_AGAP005466	Anogam_AGAP005466-RB	nan	nan	nan	nan	nan	nan	nan	nan	nan	nan	0	nan
Anogam_AGAP005469	Anogam_AGAP005469-RA	nan	nan	nan	1	1	1	nan	1	nan	1	1	1
Anogam_AGAP005472	Anogam_AGAP005472-RA	1	1	1	1	1	1	1	1	1	1	1	1
Anogam_AGAP005474	Anogam_AGAP005474-RA	1	1	1	1	1	1	1	1	1	1	1	1
Anogam_AGAP005475	Anogam_AGAP005475-RA	1	1	1	1	1	1	1	1	1	1	1	1
Anogam_AGAP005476	Anogam_AGAP005476-RA	1	1	1	1	1	1	1	1	1	1	1	1
Anogam_AGAP005477	Anogam_AGAP005477-RA	1	1	1	1	1	1	1	1	1	1	1	1
Anogam_AGAP005478	Anogam_AGAP005478-RA	1	1	1	1	1	1	1	1	1	1	1	1
Anogam_AGAP005483	Anogam_AGAP005483-RA	1	1	1	1	1	1	1	1	1	1	1	1
Anogam_AGAP005484	Anogam_AGAP005484-RA	1	1	1	1	1	1	1	1	1	1	1	1
Anogam_AGAP005486	Anogam_AGAP005486-RA	1	1	1	1	1	1	1	1	1	1	1	1
Anogam_AGAP005487	Anogam_AGAP005487-RA	1	1	1	1	nan	nan	1	1	1	1	1	1
Anogam_AGAP005490	Anogam_AGAP005490-RA	1	1	1	1	1	1	1	1	1	1	1	1
Anogam_AGAP005491	Anogam_AGAP005491-RA	nan	nan	nan	1	nan	nan	nan	nan	nan	1	1	1
Anogam_AGAP005492	Anogam_AGAP005492-RA	1	nan	nan	1	1	1	nan	nan	nan	1	1	1
Anogam_AGAP005494	Anogam_AGAP005494-RA	1	1	1	1	1	1	1	1	1	1	1	1
Anogam_AGAP005495	Anogam_AGAP005495-RA	nan	nan	nan	nan	1	nan	nan	nan	nan	1	1	1
Anogam_AGAP005497	Anogam_AGAP005497-RA	nan	nan	nan	nan	1	nan	nan	nan	nan	nan	nan	nan
Anogam_AGAP005498	Anogam_AGAP005498-RB	0.551562	0.429446	0.650849	0.652424	0.611167	0.641357	0.310306	0.570164	0.519513	0.52332	0.442304	0.647316
Anogam_AGAP005498	Anogam_AGAP005498-RC	0.388759	0.26259	0.292184	0.287012	0.231729	0.275181	0.567541	0.344914	0.411649	0.355153	0.35304	0.30648
Anogam_AGAP005498	Anogam_AGAP005498-RA	0.0596789	0.307964	0.056967	0.0605635	0.157104	0.0834619	0.122153	0.0849215	0.0688379	0.121528	0.204657	0.0462044
Anogam_AGAP005499	Anogam_AGAP005499-RA	1	1	1	1	1	1	1	1	1	1	1	1
Anogam_AGAP005504	Anogam_AGAP005504-RA	0.0524501	0.0293112	0.033498	0.0413994	0.0507571	0.014842	0.0136509	0.00764142	0.00996656	0.0301906	0.0315846	0.0122413
Anogam_AGAP005504	Anogam_AGAP005504-RB	0.483269	0.625954	0.315613	0.362604	0.542742	0.45273	0.720707	0.424115	0.448723	0.676784	0.500722	0.343729
Anogam_AGAP005504	Anogam_AGAP005504-RD	0.307453	0.222071	0.443546	0.391948	0.284283	0.346701	0.178544	0.358841	0.383227	0.185312	0.298401	0.441299
Anogam_AGAP005504	Anogam_AGAP005504-RC	0.156828	0.122664	0.207343	0.204048	0.122218	0.185726	0.0870973	0.209403	0.158083	0.107713	0.169292	0.202731
Anogam_AGAP005505	Anogam_AGAP005505-RA	1	1	1	1	1	1	1	1	1	1	1	1
Anogam_AGAP029078	Anogam_AGAP029078-RA	1	1	1	1	1	1	1	1	1	1	1	1
Anogam_AGAP005508	Anogam_AGAP005508-RA	0.585721	0.453303	0.444411	0.558094	0.407488	0.50903	0.527762	0.556028	0.580913	0.437472	0.48985	0.582633
Anogam_AGAP005508	Anogam_AGAP005508-RB	0	0	0	0	0	0	0	0	0	0	0	0
Anogam_AGAP005508	Anogam_AGAP005508-RC	0.414279	0.546697	0.555589	0.441906	0.592512	0.49097	0.472238	0.443972	0.419087	0.562528	0.51015	0.417367
Anogam_AGAP005510	Anogam_AGAP005510-RA	1	1	1	1	1	1	1	1	1	1	1	1
Anogam_AGAP005514	Anogam_AGAP005514-RA	nan	nan	1	1	1	nan	nan	nan	nan	1	1	1
Anogam_AGAP005515	Anogam_AGAP005515-RA	1	nan	nan	1	1	nan	nan	1	nan	1	1	1
Anogam_AGAP005516	Anogam_AGAP005516-RA	nan	nan	1	nan	nan	1	nan	nan	nan	1	1	nan
Anogam_AGAP005520	Anogam_AGAP005520-RA	1	1	1	1	1	1	1	1	1	1	1	1
Anogam_AGAP005521	Anogam_AGAP005521-RA	1	1	1	1	1	1	1	1	1	1	1	1
Anogam_AGAP013280	Anogam_AGAP013280-RA	1	1	1	1	1	1	1	1	1	1	1	1
Anogam_AGAP005524	Anogam_AGAP005524-RA	0.0875589	0	0.238686	0.0730612	0.304387	0.140319	0.0568984	0.0135298	0	0.251344	0	0.128498
Anogam_AGAP005524	Anogam_AGAP005524-RB	0.912441	1	0.761314	0.926939	0.695613	0.859681	0.943102	0.98647	1	0.748656	1	0.871502
Anogam_AGAP005526	Anogam_AGAP005526-RA	1	1	1	1	1	1	1	1	1	1	1	1
Anogam_AGAP005527	Anogam_AGAP005527-RA	1	1	1	1	nan	1	nan	1	1	1	1	1
Anogam_AGAP005530	Anogam_AGAP005530-RA	1	1	1	1	1	1	1	1	1	1	1	1
Anogam_AGAP005531	Anogam_AGAP005531-RA	1	1	1	1	1	1	1	1	1	1	1	1
Anogam_AGAP005533	Anogam_AGAP005533-RA	1	1	1	1	1	1	1	1	1	1	1	1
Anogam_AGAP005535	Anogam_AGAP005535-RA	1	1	1	1	1	1	1	1	1	1	1	1
Anogam_AGAP005537	Anogam_AGAP005537-RA	1	1	1	1	1	1	1	1	1	1	1	1
Anogam_AGAP005539	Anogam_AGAP005539-RA	1	1	1	1	1	1	1	1	1	1	1	1
Anogam_AGAP005540	Anogam_AGAP005540-RA	1	1	1	1	1	1	1	1	1	1	1	1
Anogam_AGAP005542	Anogam_AGAP005542-RA	1	1	1	1	1	1	1	1	1	1	1	1
Anogam_AGAP005543	Anogam_AGAP005543-RA	1	1	1	1	1	1	1	1	1	1	1	1
Anogam_AGAP005544	Anogam_AGAP005544-RA	1	1	1	1	1	1	1	1	1	1	1	1
Anogam_AGAP005548	Anogam_AGAP005548-RA	1	1	1	1	1	1	1	1	1	1	1	1
Anogam_AGAP005550	Anogam_AGAP005550-RA	1	1	1	1	1	1	1	1	1	1	1	1
Anogam_AGAP005553	Anogam_AGAP005553-RA	1	1	1	1	1	1	1	1	1	1	1	1
Anogam_AGAP005555	Anogam_AGAP005555-RA	1	1	1	1	1	1	1	1	1	1	1	1
Anogam_AGAP005556	Anogam_AGAP005556-RB	0.766859	0.863232	0.891834	0.88787	0.893009	0.886619	0.466947	0.473239	0.449111	0.9217	0.917968	0.918474
Anogam_AGAP005556	Anogam_AGAP005556-RA	0.233141	0.136768	0.108166	0.11213	0.106991	0.113381	0.533053	0.526761	0.550889	0.0783001	0.082032	0.0815261
Anogam_AGAP005560	Anogam_AGAP005560-RA	1	1	1	1	1	1	1	1	1	1	1	1
Anogam_AGAP005562	Anogam_AGAP005562-RA	1	1	1	1	1	1	1	1	1	1	1	1
Anogam_AGAP005564	Anogam_AGAP005564-RB	0.0699395	0	0.0129922	0.116053	0.0310273	0	0.115696	0.16939	0.195023	0.105876	0.0655634	0.269725
Anogam_AGAP005564	Anogam_AGAP005564-RD	0.137322	0.0299151	0	0.0479303	0	0	0.264194	0.185006	0.22224	0.260578	0.213488	0.162136
Anogam_AGAP005564	Anogam_AGAP005564-RA	0.498328	0.815521	0.987008	0.836017	0.265765	1	0.231619	0.234354	0.2455	0.251429	0.300263	0.246706
Anogam_AGAP005564	Anogam_AGAP005564-RC	0.294411	0.154563	0	0	0.703208	0	0.388492	0.41125	0.337238	0.382117	0.420686	0.321433
Anogam_AGAP005565	Anogam_AGAP005565-RA	1	1	1	1	1	1	1	1	1	1	1	1
Anogam_AGAP005566	Anogam_AGAP005566-RA	1	1	1	1	1	1	1	1	1	1	1	1
Anogam_AGAP005568	Anogam_AGAP005568-RA	1	1	1	1	1	1	1	1	1	1	1	1
Anogam_AGAP005570	Anogam_AGAP005570-RA	1	1	1	1	1	1	1	1	1	1	1	1
Anogam_AGAP005571	Anogam_AGAP005571-RA	1	1	1	1	1	1	1	1	1	1	1	1
Anogam_AGAP005572	Anogam_AGAP005572-RA	1	1	1	1	1	1	1	1	1	1	1	1
Anogam_AGAP005573	Anogam_AGAP005573-RA	1	1	1	1	1	1	1	1	1	1	1	1
Anogam_AGAP005574	Anogam_AGAP005574-RA	1	1	1	1	1	1	1	1	1	1	1	1
Anogam_AGAP005575	Anogam_AGAP005575-RA	1	1	1	1	1	1	1	1	1	1	1	1
Anogam_AGAP005578	Anogam_AGAP005578-RA	1	1	1	1	1	1	1	1	1	1	1	1
Anogam_AGAP005579	Anogam_AGAP005579-RA	1	nan	1	1	nan	1	1	1	1	1	1	1
Anogam_AGAP005582	Anogam_AGAP005582-RA	1	1	1	1	1	1	1	1	1	1	1	1
Anogam_AGAP005584	Anogam_AGAP005584-RA	1	1	1	1	1	1	1	1	1	1	1	1
Anogam_AGAP005586	Anogam_AGAP005586-RA	nan	1	nan	1	nan	nan	nan	nan	nan	nan	nan	nan
Anogam_AGAP005588	Anogam_AGAP005588-RA	nan	1	nan	nan	nan	nan	nan	1	nan	nan	nan	nan
Anogam_AGAP005589	Anogam_AGAP005589-RA	nan	nan	nan	1	nan	nan	nan	nan	nan	nan	nan	nan
Anogam_AGAP028756	Anogam_AGAP028756-RA	nan	1	nan	nan	nan	nan	nan	nan	nan	nan	nan	nan
Anogam_AGAP005591	Anogam_AGAP005591-RA	nan	nan	nan	nan	1	1	nan	nan	nan	1	1	1
Anogam_AGAP005592	Anogam_AGAP005592-RA	nan	nan	nan	nan	1	1	nan	nan	nan	1	nan	1
Anogam_AGAP005593	Anogam_AGAP005593-RA	nan	nan	nan	nan	nan	nan	nan	nan	nan	nan	nan	nan
Anogam_AGAP005596	Anogam_AGAP005596-RA	1	1	nan	nan	nan	1	nan	nan	nan	nan	nan	1
Anogam_AGAP005597	Anogam_AGAP005597-RA	nan	nan	nan	nan	nan	nan	nan	nan	nan	nan	nan	1
Anogam_AGAP005598	Anogam_AGAP005598-RA	nan	nan	nan	nan	nan	nan	nan	nan	nan	nan	nan	nan
Anogam_AGAP005600	Anogam_AGAP005600-RA	1	1	nan	1	nan	1	nan	nan	nan	1	1	1
Anogam_AGAP005603	Anogam_AGAP005603-RA	1	1	1	1	1	1	1	1	1	1	1	1
Anogam_AGAP005605	Anogam_AGAP005605-RA	1	1	1	1	1	1	1	1	1	1	1	1
Anogam_AGAP005608	Anogam_AGAP005608-RA	1	1	1	1	1	1	1	1	1	1	1	1
Anogam_AGAP005614	Anogam_AGAP005614-RA	nan	1	nan	nan	1	1	nan	1	nan	1	1	1
Anogam_AGAP005616	Anogam_AGAP005616-RA	1	1	1	1	1	1	1	1	1	1	1	1
Anogam_AGAP005618	Anogam_AGAP005618-RA	1	1	1	1	1	1	1	1	1	1	1	1
Anogam_AGAP005621	Anogam_AGAP005621-RA	1	1	1	1	1	1	1	1	1	1	1	1
Anogam_AGAP005623	Anogam_AGAP005623-RA	1	1	1	1	1	1	1	1	1	1	1	1
Anogam_AGAP005625	Anogam_AGAP005625-RA	0.989482	0.994695	0.988149	0.967781	0.989592	0.957515	0.983108	0.984204	0.976281	0.987924	0.985095	0.978488
Anogam_AGAP005625	Anogam_AGAP005625-RB	0.0105183	0.00530501	0.0118506	0.0322187	0.0104078	0.0424847	0.0168918	0.0157965	0.0237194	0.0120764	0.0149055	0.0215118
Anogam_AGAP005630	Anogam_AGAP005630-RA	1	1	1	1	1	1	1	1	1	1	1	1
Anogam_AGAP005631	Anogam_AGAP005631-RA	1	1	1	1	1	1	1	1	1	1	1	1
Anogam_AGAP005634	Anogam_AGAP005634-RA	1	1	1	1	1	1	1	1	1	1	1	1
Anogam_AGAP005635	Anogam_AGAP005635-RB	0.296646	0.323337	0.112583	0.245592	0.324775	0.377212	0.381081	0.412599	0.367121	0.377313	0.162395	0.0758638
Anogam_AGAP005635	Anogam_AGAP005635-RA	0.703354	0.676663	0.887417	0.754408	0.675225	0.622788	0.618919	0.587401	0.632879	0.622687	0.837605	0.924136
Anogam_AGAP005636	Anogam_AGAP005636-RA	nan	nan	nan	1	1	1	nan	1	1	1	1	1
Anogam_AGAP005639	Anogam_AGAP005639-RA	1	1	nan	1	1	1	1	1	1	1	1	1
Anogam_AGAP005641	Anogam_AGAP005641-RA	1	1	1	1	1	1	1	1	1	1	1	1
Anogam_AGAP005644	Anogam_AGAP005644-RA	1	1	1	1	1	1	nan	1	1	1	1	1
Anogam_AGAP005645	Anogam_AGAP005645-RA	1	1	1	1	1	1	1	1	1	1	1	1
Anogam_AGAP005646	Anogam_AGAP005646-RA	1	1	1	1	1	1	1	1	1	1	1	1
Anogam_AGAP005647	Anogam_AGAP005647-RA	1	1	1	1	1	1	1	1	1	1	1	1
Anogam_AGAP005650	Anogam_AGAP005650-RA	1	1	1	1	1	1	1	1	1	1	1	1
Anogam_AGAP005653	Anogam_AGAP005653-RA	1	1	1	1	1	1	1	1	1	1	1	1
Anogam_AGAP005656	Anogam_AGAP005656-RA	1	1	1	1	1	1	1	1	1	1	1	1
Anogam_AGAP005657	Anogam_AGAP005657-RA	1	1	1	1	nan	1	1	1	1	1	1	1
Anogam_AGAP005661	Anogam_AGAP005661-RB	0	0.0159533	0	0	0	0	0	0.0294649	0	0.0151185	0	0
Anogam_AGAP005661	Anogam_AGAP005661-RA	1	0.984047	1	1	1	1	1	0.970535	1	0.984882	1	1
Anogam_AGAP005662	Anogam_AGAP005662-RA	1	1	1	1	1	1	1	1	1	1	1	1
Anogam_AGAP005663	Anogam_AGAP005663-RA	nan	nan	nan	nan	nan	nan	nan	nan	nan	nan	nan	nan
Anogam_AGAP005664	Anogam_AGAP005664-RA	1	nan	nan	nan	nan	nan	1	nan	nan	nan	nan	nan
Anogam_AGAP005670	Anogam_AGAP005670-RA	nan	nan	nan	nan	nan	nan	nan	nan	nan	nan	nan	nan
Anogam_AGAP005671	Anogam_AGAP005671-RA	nan	nan	nan	nan	nan	nan	nan	nan	nan	nan	nan	1
Anogam_AGAP005672	Anogam_AGAP005672-RB	0.480263	0.339392	0.232563	0.255236	0.12414	0.0346729	0.473079	0.626308	0.563412	0.312868	0.337785	3.38549e-05
Anogam_AGAP005672	Anogam_AGAP005672-RA	0.519737	0.660608	0.767437	0.744764	0.87586	0.965327	0.526921	0.373692	0.436588	0.687132	0.662215	0.999966
Anogam_AGAP005673	Anogam_AGAP005673-RA	1	1	1	1	1	1	1	1	1	1	1	1
Anogam_AGAP005674	Anogam_AGAP005674-RA	1	1	1	1	1	1	1	1	1	1	1	1
Anogam_AGAP005677	Anogam_AGAP005677-RA	1	1	1	1	nan	1	nan	1	1	1	1	1
Anogam_AGAP005678	Anogam_AGAP005678-RA	1	nan	nan	1	nan	1	nan	nan	1	1	1	1
Anogam_AGAP005679	Anogam_AGAP005679-RA	nan	nan	nan	nan	nan	nan	nan	nan	nan	1	nan	1
Anogam_AGAP005680	Anogam_AGAP005680-RA	1	1	1	1	1	1	1	1	1	1	1	1
Anogam_AGAP005681	Anogam_AGAP005681-RA	1	1	1	1	1	1	nan	1	1	1	1	1
Anogam_AGAP005683	Anogam_AGAP005683-RA	1	1	1	1	1	1	1	1	1	1	1	1
Anogam_AGAP005685	Anogam_AGAP005685-RA	1	1	1	1	1	1	1	1	1	1	1	1
Anogam_AGAP005686	Anogam_AGAP005686-RA	nan	nan	nan	nan	nan	nan	nan	nan	nan	nan	nan	1
Anogam_AGAP005687	Anogam_AGAP005687-RA	nan	1	nan	nan	nan	1	nan	nan	nan	nan	nan	1
Anogam_AGAP005688	Anogam_AGAP005688-RA	nan	1	nan	nan	nan	nan	nan	nan	nan	nan	nan	nan
Anogam_AGAP005695	Anogam_AGAP005695-RA	nan	nan	nan	nan	nan	nan	nan	nan	nan	nan	nan	1
Anogam_AGAP005696	Anogam_AGAP005696-RA	nan	nan	nan	nan	nan	nan	1	nan	nan	1	nan	1
Anogam_AGAP005699	Anogam_AGAP005699-RA	1	1	1	1	1	1	1	1	1	1	1	1
Anogam_AGAP005701	Anogam_AGAP005701-RA	1	1	1	1	1	1	1	1	1	1	1	1
Anogam_AGAP005702	Anogam_AGAP005702-RA	1	nan	nan	1	nan	nan	nan	nan	nan	1	1	1
Anogam_AGAP005703	Anogam_AGAP005703-RA	nan	nan	nan	nan	nan	nan	nan	nan	nan	nan	nan	nan
Anogam_AGAP005705	Anogam_AGAP005705-RA	1	nan	nan	nan	nan	nan	nan	1	1	nan	nan	1
Anogam_AGAP005706	Anogam_AGAP005706-RA	nan	nan	nan	1	nan	nan	1	1	1	1	1	1
Anogam_AGAP005707	Anogam_AGAP005707-RA	nan	nan	nan	1	nan	nan	nan	nan	nan	1	1	1
Anogam_AGAP005708	Anogam_AGAP005708-RA	1	nan	nan	nan	nan	1	nan	nan	nan	1	1	1
Anogam_AGAP005709	Anogam_AGAP005709-RA	nan	1	nan	1	nan	nan	nan	nan	nan	1	1	1
Anogam_AGAP005712	Anogam_AGAP005712-RC	0.564105	0.804029	0.914731	0.636692	0.741165	0.608071	0.625207	0.606964	0.710789	0.882498	0.846468	0.746423
Anogam_AGAP005712	Anogam_AGAP005712-RA	0.159785	0.148699	0.0524206	0.166585	0.223215	0.342087	0.168105	0.224109	0.210836	0.0791673	0.145258	0.253577
Anogam_AGAP005712	Anogam_AGAP005712-RB	0.27611	0.0472717	0.0328488	0.196723	0.03562	0.0498418	0.206689	0.168928	0.0783753	0.038335	0.00827415	0
Anogam_AGAP028448	Anogam_AGAP028448-RA	1	1	1	1	1	1	1	1	1	1	1	1
Anogam_AGAP005714	Anogam_AGAP005714-RA	1	nan	nan	1	1	1	1	1	1	1	1	1
Anogam_AGAP005717	Anogam_AGAP005717-RA	1	1	1	1	1	1	1	1	1	1	1	1
Anogam_AGAP005721	Anogam_AGAP005721-RA	1	1	1	1	1	1	1	1	1	1	1	1
Anogam_AGAP005725	Anogam_AGAP005725-RA	1	1	1	1	1	nan	1	1	1	1	1	1
Anogam_AGAP013675	Anogam_AGAP013675-RA	nan	1	nan	nan	1	nan	1	1	1	1	1	1
Anogam_AGAP005728	Anogam_AGAP005728-RA	1	1	1	1	1	1	1	1	1	1	1	1
Anogam_AGAP005729	Anogam_AGAP005729-RA	1	1	1	1	1	1	1	1	1	1	1	1
Anogam_AGAP005731	Anogam_AGAP005731-RA	0.951222	1	1	1	1	1	1	1	1	1	1	1
Anogam_AGAP005731	Anogam_AGAP005731-RB	0.0487784	0	0	0	0	0	0	0	0	0	0	0
Anogam_AGAP005733	Anogam_AGAP005733-RA	1	1	1	nan	1	1	1	1	1	nan	nan	nan
Anogam_AGAP005734	Anogam_AGAP005734-RA	1	nan	nan	1	1	1	1	1	1	1	1	1
Anogam_AGAP005738	Anogam_AGAP005738-RA	1	1	1	1	1	1	1	1	1	1	1	1
Anogam_AGAP005742	Anogam_AGAP005742-RA	0.664211	0.479762	0.585444	0.840396	0.359298	0.376416	0.443042	0.551717	0.678108	0.524638	0.480536	0.612612
Anogam_AGAP005742	Anogam_AGAP005742-RB	0.335789	0.520238	0.414556	0.159604	0.640702	0.623584	0.556958	0.448283	0.321892	0.475362	0.519464	0.387388
Anogam_AGAP005745	Anogam_AGAP005745-RA	1	1	1	1	1	1	1	1	1	1	1	1
Anogam_AGAP005746	Anogam_AGAP005746-RA	1	1	1	1	1	1	1	1	1	1	1	1
Anogam_AGAP005749	Anogam_AGAP005749-RA	1	1	1	1	1	1	1	1	1	1	1	1
Anogam_AGAP005750	Anogam_AGAP005750-RA	1	1	1	1	1	1	1	1	1	1	1	1
Anogam_AGAP005751	Anogam_AGAP005751-RA	nan	nan	1	1	1	nan	1	1	1	1	1	1
Anogam_AGAP005752	Anogam_AGAP005752-RA	1	1	1	1	1	1	1	1	1	1	1	1
Anogam_AGAP005754	Anogam_AGAP005754-RA	nan	nan	nan	nan	1	nan	1	nan	nan	1	1	1
Anogam_AGAP005755	Anogam_AGAP005755-RA	0	0	0	0.917321	0.67314	1	nan	nan	nan	0.950952	1	0.891427
Anogam_AGAP005755	Anogam_AGAP005755-RB	1	1	1	0.0826793	0.32686	0	nan	nan	nan	0.0490484	0	0.108573
Anogam_AGAP005759	Anogam_AGAP005759-RA	1	1	1	1	1	1	1	1	1	1	1	1
Anogam_AGAP005760	Anogam_AGAP005760-RA	1	nan	1	1	nan	1	nan	nan	1	1	1	nan
Anogam_AGAP005762	Anogam_AGAP005762-RB	0.362047	0.105102	0.39057	0.243858	0.133751	0.412828	0.401869	0.548966	0.582304	0.236459	0.160053	0.159196
Anogam_AGAP005762	Anogam_AGAP005762-RA	0.637953	0.894898	0.60943	0.756142	0.866249	0.587172	0.598131	0.451034	0.417696	0.763541	0.839947	0.840804
Anogam_AGAP005764	Anogam_AGAP005764-RA	1	1	1	1	1	1	1	1	1	1	1	1
Anogam_AGAP005766	Anogam_AGAP005766-RA	1	nan	nan	nan	1	1	1	nan	nan	1	1	1
Anogam_AGAP005767	Anogam_AGAP005767-RA	1	1	1	1	1	1	1	1	1	1	1	1
Anogam_AGAP005768	Anogam_AGAP005768-RA	1	1	1	1	1	1	1	1	1	1	1	1
Anogam_AGAP005769	Anogam_AGAP005769-RA	1	1	1	1	1	1	1	1	1	1	1	1
Anogam_AGAP005771	Anogam_AGAP005771-RA	1	1	1	1	1	1	1	1	1	1	1	1
Anogam_AGAP005773	Anogam_AGAP005773-RA	0.569723	0.38591	0.564306	0.522178	0.450676	0.468414	0.426155	0.392524	0.710983	0.334654	0.293178	0.281717
Anogam_AGAP005773	Anogam_AGAP005773-RB	0.430277	0.61409	0.435694	0.477822	0.549324	0.531586	0.573845	0.607476	0.289017	0.665346	0.706822	0.718283
Anogam_AGAP005776	Anogam_AGAP005776-RA	1	1	1	1	1	1	1	1	1	1	1	1
Anogam_AGAP005778	Anogam_AGAP005778-RA	1	1	1	1	1	1	1	1	1	1	1	1
Anogam_AGAP005782	Anogam_AGAP005782-RA	1	1	1	1	1	1	1	1	1	1	1	1
Anogam_AGAP005784	Anogam_AGAP005784-RA	1	1	1	1	1	1	1	1	1	1	1	1
Anogam_AGAP005785	Anogam_AGAP005785-RA	1	1	1	nan	1	1	1	nan	nan	1	1	1
Anogam_AGAP005786	Anogam_AGAP005786-RA	1	1	1	nan	nan	1	nan	nan	nan	1	nan	nan
Anogam_AGAP005787	Anogam_AGAP005787-RA	nan	nan	nan	1	nan	nan	nan	nan	nan	1	1	1
Anogam_AGAP028396	Anogam_AGAP028396-RA	1	1	1	1	1	1	1	1	1	1	1	1
Anogam_AGAP005788	Anogam_AGAP005788-RA	1	1	1	1	1	1	1	1	1	1	1	1
Anogam_AGAP005789	Anogam_AGAP005789-RA	1	1	1	1	1	1	1	1	1	1	1	1
Anogam_AGAP005790	Anogam_AGAP005790-RA	nan	nan	nan	nan	1	1	nan	nan	nan	nan	1	nan
Anogam_AGAP005792	Anogam_AGAP005792-RA	nan	nan	nan	nan	1	1	nan	nan	nan	nan	1	nan
Anogam_AGAP005794	Anogam_AGAP005794-RA	1	1	1	1	1	nan	nan	1	nan	1	1	1
Anogam_AGAP005795	Anogam_AGAP005795-RA	1	1	nan	nan	1	1	1	1	1	1	1	1
Anogam_AGAP005796	Anogam_AGAP005796-RA	1	1	1	1	1	1	1	1	1	1	1	1
Anogam_AGAP005797	Anogam_AGAP005797-RA	1	1	1	1	1	1	1	1	1	1	1	1
Anogam_AGAP005800	Anogam_AGAP005800-RA	1	1	1	1	1	1	1	1	1	1	1	1
Anogam_AGAP005802	Anogam_AGAP005802-RA	1	1	1	1	1	1	1	1	1	1	1	1
Anogam_AGAP005803	Anogam_AGAP005803-RA	1	1	1	1	1	1	1	1	1	1	1	1
Anogam_AGAP028981	Anogam_AGAP028981-RA	nan	nan	nan	nan	nan	nan	nan	nan	nan	nan	nan	nan
Anogam_AGAP005805	Anogam_AGAP005805-RA	nan	nan	nan	1	1	1	nan	nan	nan	1	1	1
Anogam_AGAP005809	Anogam_AGAP005809-RA	1	1	1	1	1	1	1	1	1	1	1	1
Anogam_AGAP005812	Anogam_AGAP005812-RA	1	1	1	1	1	1	1	1	1	1	1	1
Anogam_AGAP005815	Anogam_AGAP005815-RA	1	1	1	1	1	1	1	1	1	1	1	1
Anogam_AGAP005817	Anogam_AGAP005817-RA	1	1	1	1	1	1	1	1	1	1	1	1
Anogam_AGAP005820	Anogam_AGAP005820-RA	1	1	1	1	1	1	1	1	1	1	1	1
Anogam_AGAP005821	Anogam_AGAP005821-RA	1	nan	1	1	nan	nan	1	nan	nan	nan	nan	nan
Anogam_AGAP005823	Anogam_AGAP005823-RA	1	1	1	1	1	1	1	1	1	1	1	1
Anogam_AGAP005825	Anogam_AGAP005825-RA	1	1	1	1	1	1	1	1	1	1	1	1
Anogam_AGAP005828	Anogam_AGAP005828-RA	0.0855701	0.0847587	0.0344302	0.0465219	0.0596332	0.0338787	0.00366158	0.0121348	0.00598611	0.0254202	0.0245087	0.0156071
Anogam_AGAP005828	Anogam_AGAP005828-RB	0.485979	0.530282	0.352059	0.331786	0.363475	0.473546	0.57142	0.622904	0.410426	0.522598	0.634794	0.587946
Anogam_AGAP005828	Anogam_AGAP005828-RC	0.428451	0.38496	0.613511	0.621693	0.576892	0.492575	0.424919	0.364961	0.583588	0.451982	0.340697	0.396447
Anogam_AGAP005830	Anogam_AGAP005830-RA	1	1	1	1	1	nan	1	1	1	1	1	1
Anogam_AGAP005831	Anogam_AGAP005831-RA	1	1	1	1	1	1	1	1	1	1	1	1
Anogam_AGAP005833	Anogam_AGAP005833-RA	1	1	nan	1	1	1	nan	1	nan	1	1	1
Anogam_AGAP005834	Anogam_AGAP005834-RA	1	1	1	1	1	1	1	1	1	1	1	1
Anogam_AGAP005835	Anogam_AGAP005835-RA	1	1	1	1	1	nan	nan	1	nan	1	nan	1
Anogam_AGAP005836	Anogam_AGAP005836-RA	1	1	1	1	1	1	nan	nan	1	1	nan	1
Anogam_AGAP005837	Anogam_AGAP005837-RA	1	1	1	1	1	1	1	1	1	1	1	1
Anogam_AGAP005838	Anogam_AGAP005838-RA	1	1	1	1	1	1	1	1	1	1	1	1
Anogam_AGAP005839	Anogam_AGAP005839-RA	1	1	1	1	1	1	1	1	1	1	1	1
Anogam_AGAP005842	Anogam_AGAP005842-RA	1	1	1	1	1	1	1	1	1	1	1	1
Anogam_AGAP005845	Anogam_AGAP005845-RA	1	1	1	1	1	1	1	1	1	1	1	1
Anogam_AGAP005847	Anogam_AGAP005847-RA	1	1	1	1	1	1	1	1	1	1	1	1
Anogam_AGAP005848	Anogam_AGAP005848-RA	1	1	1	1	1	1	1	1	1	1	1	1
Anogam_AGAP005849	Anogam_AGAP005849-RA	1	1	1	1	1	1	1	1	1	1	1	1
Anogam_AGAP005850	Anogam_AGAP005850-RA	nan	nan	nan	1	1	1	nan	nan	nan	1	1	1
Anogam_AGAP005852	Anogam_AGAP005852-RA	1	1	1	1	1	1	1	1	1	1	1	1
Anogam_AGAP028450	Anogam_AGAP028450-RA	1	nan	nan	nan	nan	nan	nan	nan	nan	nan	nan	nan
Anogam_AGAP005856	Anogam_AGAP005856-RA	1	1	1	1	1	1	1	1	1	1	1	1
Anogam_AGAP005858	Anogam_AGAP005858-RA	1	1	1	1	1	1	1	1	1	1	1	1
Anogam_AGAP005859	Anogam_AGAP005859-RA	nan	1	1	nan	1	nan	1	1	nan	1	1	1
Anogam_AGAP005860	Anogam_AGAP005860-RA	1	1	1	1	1	1	1	1	1	1	1	1
Anogam_AGAP005862	Anogam_AGAP005862-RA	1	1	1	1	1	1	1	1	1	1	1	1
Anogam_AGAP005863	Anogam_AGAP005863-RA	1	1	1	1	1	1	1	1	1	1	1	1
Anogam_AGAP005866	Anogam_AGAP005866-RA	1	1	1	1	1	1	1	1	1	1	1	1
Anogam_AGAP005870	Anogam_AGAP005870-RA	0	0.0811998	0	0	0	0	0	0	0.091193	0	0.101039	0
Anogam_AGAP005870	Anogam_AGAP005870-RB	1	0.9188	1	1	1	1	1	1	0.908807	1	0.898961	1
Anogam_AGAP005874	Anogam_AGAP005874-RA	1	1	1	1	1	1	1	1	1	1	1	1
Anogam_AGAP005878	Anogam_AGAP005878-RB	0.828266	0.760621	0.839972	0.948891	1	0.908094	1	0.640835	1	0.785731	0.841856	0.97343
Anogam_AGAP005878	Anogam_AGAP005878-RA	0.171734	0.239379	0.160028	0.0511094	0	0.091906	0	0.359165	0	0.214269	0.158144	0.0265699
Anogam_AGAP005881	Anogam_AGAP005881-RA	1	1	1	1	1	1	1	1	1	1	1	1
Anogam_AGAP005882	Anogam_AGAP005882-RA	1	1	1	1	1	1	1	1	1	1	1	1
Anogam_AGAP005885	Anogam_AGAP005885-RA	1	nan	1	1	1	1	nan	1	1	1	1	1
Anogam_AGAP005890	Anogam_AGAP005890-RA	0.0312548	0.0421003	0	0.0594	0.0411854	0.0368821	0.0394702	0.0388129	0.053705	0.0381589	0.0493142	0.0493987
Anogam_AGAP005890	Anogam_AGAP005890-RB	0.968745	0.9579	1	0.9406	0.958815	0.963118	0.96053	0.961187	0.946295	0.961841	0.950686	0.950601
Anogam_AGAP028260	Anogam_AGAP028260-RA	nan	nan	nan	nan	nan	nan	nan	nan	nan	1	nan	nan
Anogam_AGAP005892	Anogam_AGAP005892-RA	1	1	1	1	1	1	1	1	1	1	1	1
Anogam_AGAP005894	Anogam_AGAP005894-RA	1	1	1	1	1	1	1	1	1	1	1	1
Anogam_AGAP005896	Anogam_AGAP005896-RA	nan	nan	nan	nan	nan	1	nan	nan	nan	1	1	1
Anogam_AGAP005899	Anogam_AGAP005899-RA	nan	1	1	1	1	nan	1	1	1	1	1	nan
Anogam_AGAP005903	Anogam_AGAP005903-RA	0	0	0.682634	nan	nan	nan	nan	nan	nan	1	1	0.844582
Anogam_AGAP005903	Anogam_AGAP005903-RB	1	1	0.317366	nan	nan	nan	nan	nan	nan	0	0	0.155418
Anogam_AGAP005906	Anogam_AGAP005906-RA	1	1	1	1	1	1	1	1	1	1	1	1
Anogam_AGAP005907	Anogam_AGAP005907-RA	1	1	nan	nan	1	1	nan	1	nan	1	1	1
Anogam_AGAP005909	Anogam_AGAP005909-RA	1	1	1	1	1	1	1	1	1	1	1	1
Anogam_AGAP005911	Anogam_AGAP005911-RA	1	1	1	1	1	1	1	1	1	1	1	1
Anogam_AGAP005912	Anogam_AGAP005912-RA	1	1	1	1	1	1	1	1	1	1	1	1
Anogam_AGAP005913	Anogam_AGAP005913-RA	1	1	1	1	1	1	1	1	1	1	1	1
Anogam_AGAP005915	Anogam_AGAP005915-RA	1	1	nan	1	1	1	1	nan	1	1	1	1
Anogam_AGAP005916	Anogam_AGAP005916-RA	1	1	1	1	1	1	1	1	1	1	1	1
Anogam_AGAP005922	Anogam_AGAP005922-RA	1	1	1	1	1	1	1	1	1	1	1	1
Anogam_AGAP005924	Anogam_AGAP005924-RA	1	1	1	1	1	1	1	1	1	1	1	1
Anogam_AGAP005925	Anogam_AGAP005925-RA	1	1	1	1	1	1	1	1	1	1	1	1
Anogam_AGAP005926	Anogam_AGAP005926-RA	1	1	1	1	1	1	1	1	1	1	1	1
Anogam_AGAP005928	Anogam_AGAP005928-RA	0.637021	0.598329	0.718802	0.457763	0.463649	0.782341	0.490607	0.744004	1	0.799359	0.443745	0.60866
Anogam_AGAP005928	Anogam_AGAP005928-RB	0.362979	0.401671	0.281198	0.542237	0.536351	0.217659	0.509393	0.255996	0	0.200641	0.556255	0.39134
Anogam_AGAP005929	Anogam_AGAP005929-RA	1	1	1	1	1	1	1	1	1	1	1	1
Anogam_AGAP005930	Anogam_AGAP005930-RA	nan	nan	nan	1	nan	nan	nan	nan	nan	nan	nan	1
Anogam_AGAP005932	Anogam_AGAP005932-RA	1	1	1	1	1	1	1	1	1	1	1	1
Anogam_AGAP005933	Anogam_AGAP005933-RA	1	1	1	1	1	1	1	1	1	1	1	1
Anogam_AGAP005936	Anogam_AGAP005936-RA	1	1	1	1	1	1	1	1	1	1	1	1
Anogam_AGAP005938	Anogam_AGAP005938-RA	1	1	1	1	1	1	1	1	1	1	1	1
Anogam_AGAP005939	Anogam_AGAP005939-RA	1	1	1	1	1	1	1	1	1	1	1	1
Anogam_AGAP005941	Anogam_AGAP005941-RA	nan	1	nan	1	1	1	1	nan	1	1	1	nan
Anogam_AGAP005942	Anogam_AGAP005942-RA	1	1	0	1	0.985919	1	1	0.945917	0.981087	1	1	1
Anogam_AGAP005942	Anogam_AGAP005942-RB	0	0	1	0	0.0140805	0	0	0.0540833	0.0189133	0	0	0
Anogam_AGAP005944	Anogam_AGAP005944-RA	1	1	1	1	1	1	1	1	1	1	1	1
Anogam_AGAP005945	Anogam_AGAP005945-RA	0.297223	0.360758	0.0519155	0.795851	0.648234	0.76927	0.217674	0.360157	0.319199	0.637697	0.548727	0.525265
Anogam_AGAP005945	Anogam_AGAP005945-RB	0.702777	0.639242	0.948085	0.204149	0.351766	0.23073	0.782326	0.639843	0.680801	0.362303	0.451273	0.474735
Anogam_AGAP005946	Anogam_AGAP005946-RA	1	1	1	1	1	1	1	1	1	1	1	1
Anogam_AGAP005949	Anogam_AGAP005949-RB	0.728554	0.644552	0.519867	0.303294	0.572527	0.362328	0.977564	0.959898	0.984999	0.887358	0.957067	0.951093
Anogam_AGAP005949	Anogam_AGAP005949-RA	0.271446	0.355448	0.480133	0.696706	0.427473	0.637672	0.022436	0.0401016	0.0150009	0.112642	0.0429334	0.0489067
Anogam_AGAP005951	Anogam_AGAP005951-RA	nan	nan	nan	nan	nan	nan	nan	1	nan	1	1	1
Anogam_AGAP005954	Anogam_AGAP005954-RA	1	1	1	1	1	1	1	1	1	1	1	1
Anogam_AGAP005956	Anogam_AGAP005956-RA	1	1	1	1	1	1	1	1	1	1	1	1
Anogam_AGAP005958	Anogam_AGAP005958-RA	1	nan	1	1	1	1	1	nan	1	1	nan	1
Anogam_AGAP005960	Anogam_AGAP005960-RA	1	1	1	1	1	1	1	1	1	1	1	1
Anogam_AGAP005962	Anogam_AGAP005962-RA	1	1	1	1	1	1	1	1	1	1	1	1
Anogam_AGAP005963	Anogam_AGAP005963-RA	1	1	1	1	1	1	1	1	1	1	1	1
Anogam_AGAP005964	Anogam_AGAP005964-RB	0	0	0	0	0	0	0	0	0	0	0	0
Anogam_AGAP005964	Anogam_AGAP005964-RA	1	1	1	1	1	1	1	1	1	1	1	1
Anogam_AGAP005966	Anogam_AGAP005966-RA	nan	nan	nan	nan	nan	nan	nan	nan	nan	nan	nan	nan
Anogam_AGAP005968	Anogam_AGAP005968-RA	nan	nan	nan	nan	nan	nan	nan	nan	nan	1	1	nan
Anogam_AGAP005970	Anogam_AGAP005970-RA	1	nan	1	1	nan	1	1	nan	1	1	1	1
Anogam_AGAP005971	Anogam_AGAP005971-RA	1	1	1	1	1	1	1	1	1	1	1	1
Anogam_AGAP005973	Anogam_AGAP005973-RA	1	1	1	1	1	1	1	1	1	1	1	1
Anogam_AGAP005975	Anogam_AGAP005975-RA	1	1	1	1	1	1	1	1	nan	1	1	1
Anogam_AGAP028397	Anogam_AGAP028397-RA	1	1	1	1	1	1	1	1	1	1	1	1
Anogam_AGAP005978	Anogam_AGAP005978-RA	0.176832	0.234097	0.178033	0.124095	0.307952	0.293042	0.281542	0.252178	0.240696	0.400157	0.484804	0.439663
Anogam_AGAP005978	Anogam_AGAP005978-RB	0.823168	0.765903	0.821967	0.875905	0.692048	0.706958	0.718458	0.747822	0.759304	0.599843	0.515196	0.560337
Anogam_AGAP005981	Anogam_AGAP005981-RA	1	1	1	1	1	1	1	1	1	1	1	1
Anogam_AGAP005983	Anogam_AGAP005983-RA	1	1	1	1	1	nan	1	nan	1	1	1	1
Anogam_AGAP005990	Anogam_AGAP005990-RA	1	1	1	1	1	1	1	1	1	1	1	1
Anogam_AGAP005992	Anogam_AGAP005992-RA	1	1	1	1	1	1	1	1	1	1	1	1
Anogam_AGAP005993	Anogam_AGAP005993-RA	1	1	1	1	1	1	1	1	1	1	1	1
Anogam_AGAP005994	Anogam_AGAP005994-RA	nan	nan	nan	1	1	1	nan	nan	nan	1	1	1
Anogam_AGAP005995	Anogam_AGAP005995-RA	1	nan	nan	nan	nan	nan	nan	1	nan	nan	nan	nan
Anogam_AGAP005996	Anogam_AGAP005996-RA	1	1	nan	1	nan	1	1	1	1	1	1	1
Anogam_AGAP005997	Anogam_AGAP005997-RA	nan	nan	nan	nan	nan	nan	nan	nan	nan	nan	nan	nan
Anogam_AGAP005998	Anogam_AGAP005998-RA	1	1	1	nan	nan	nan	1	1	1	1	1	1
Anogam_AGAP005999	Anogam_AGAP005999-RA	1	1	nan	nan	1	nan	1	1	1	nan	1	nan
Anogam_AGAP006000	Anogam_AGAP006000-RA	1	1	1	nan	nan	nan	1	1	1	1	1	1
Anogam_AGAP006001	Anogam_AGAP006001-RA	1	1	1	1	1	1	1	1	1	1	1	1
Anogam_AGAP006003	Anogam_AGAP006003-RA	1	nan	nan	nan	1	nan	nan	nan	nan	1	nan	nan
Anogam_AGAP006004	Anogam_AGAP006004-RA	1	nan	nan	nan	1	nan	nan	nan	nan	1	nan	nan
Anogam_AGAP006005	Anogam_AGAP006005-RA	nan	nan	nan	nan	nan	nan	nan	nan	nan	nan	nan	1
Anogam_AGAP006006	Anogam_AGAP006006-RA	nan	nan	nan	nan	nan	nan	nan	nan	1	nan	nan	nan
Anogam_AGAP006009	Anogam_AGAP006009-RA	nan	nan	nan	nan	nan	nan	1	nan	1	1	1	1
Anogam_AGAP006010	Anogam_AGAP006010-RA	nan	nan	nan	nan	nan	nan	nan	nan	nan	nan	nan	nan
Anogam_AGAP006012	Anogam_AGAP006012-RA	nan	nan	nan	nan	nan	nan	nan	nan	nan	nan	nan	nan
Anogam_AGAP006015	Anogam_AGAP006015-RA	1	1	1	1	1	1	1	1	1	1	1	1
Anogam_AGAP006016	Anogam_AGAP006016-RA	1	1	1	1	nan	1	1	1	1	1	1	1
Anogam_AGAP006017	Anogam_AGAP006017-RA	1	1	1	1	1	1	1	1	1	1	1	1
Anogam_AGAP006018	Anogam_AGAP006018-RB	0.562651	0.168185	0.323431	0.109857	0.315938	0.101974	0.18388	0.709486	0.759967	0.283463	0.820274	0
Anogam_AGAP006018	Anogam_AGAP006018-RA	0.437349	0.831815	0.676569	0.890143	0.684062	0.898026	0.81612	0.290514	0.240033	0.716537	0.179726	1
Anogam_AGAP006020	Anogam_AGAP006020-RA	1	1	1	1	1	1	1	1	1	1	1	1
Anogam_AGAP006022	Anogam_AGAP006022-RA	1	1	1	1	1	1	1	1	1	1	1	1
Anogam_AGAP006023	Anogam_AGAP006023-RA	0.512558	0.965163	0.259471	1	1	0.6702	0.590305	0.395641	0.50118	1	1	1
Anogam_AGAP006023	Anogam_AGAP006023-RB	0.487442	0.0348374	0.740529	0	0	0.3298	0.409695	0.604359	0.49882	0	0	0
Anogam_AGAP006024	Anogam_AGAP006024-RA	1	1	nan	1	1	1	1	nan	1	1	1	1
Anogam_AGAP006025	Anogam_AGAP006025-RA	1	nan	nan	1	1	nan	1	1	1	1	1	1
Anogam_AGAP006026	Anogam_AGAP006026-RA	1	1	1	nan	1	1	nan	1	1	1	nan	1
Anogam_AGAP006030	Anogam_AGAP006030-RA	1	1	1	1	1	1	1	1	1	1	1	1
Anogam_AGAP006032	Anogam_AGAP006032-RA	1	1	nan	1	1	1	nan	nan	nan	nan	1	nan
Anogam_AGAP006033	Anogam_AGAP006033-RA	nan	nan	nan	nan	1	nan	nan	nan	nan	1	1	1
Anogam_AGAP006034	Anogam_AGAP006034-RA	1	nan	nan	nan	1	1	nan	1	1	1	1	1
Anogam_AGAP006039	Anogam_AGAP006039-RA	1	1	1	1	1	1	1	1	1	1	1	1
Anogam_AGAP006040	Anogam_AGAP006040-RA	1	1	1	1	1	1	1	1	1	1	1	1
Anogam_AGAP006042	Anogam_AGAP006042-RA	0.280062	0.183924	0.291226	0.428937	0.394526	0.310242	0.301682	0.15511	0.315195	0.168977	0.188278	0.283337
Anogam_AGAP006042	Anogam_AGAP006042-RB	0.719938	0.816076	0.708774	0.571063	0.605474	0.689758	0.698318	0.84489	0.684805	0.831023	0.811722	0.716663
Anogam_AGAP029130	Anogam_AGAP029130-RA	1	1	1	1	1	1	1	1	1	1	1	1
Anogam_AGAP029102	Anogam_AGAP029102-RA	1	1	1	1	1	1	1	1	1	1	1	1
Anogam_AGAP006045	Anogam_AGAP006045-RA	1	1	1	1	1	1	1	1	1	1	1	1
Anogam_AGAP006047	Anogam_AGAP006047-RA	1	1	1	1	1	1	1	1	1	1	1	1
Anogam_AGAP006048	Anogam_AGAP006048-RA	1	1	1	1	1	1	1	1	1	1	1	1
Anogam_AGAP006049	Anogam_AGAP006049-RA	1	1	1	1	1	1	1	nan	1	1	1	1
Anogam_AGAP006050	Anogam_AGAP006050-RA	1	1	1	1	1	1	1	1	1	1	1	1
Anogam_AGAP029185	Anogam_AGAP029185-RA	1	1	1	1	1	1	1	1	1	1	1	1
Anogam_AGAP006055	Anogam_AGAP006055-RA	1	1	1	1	1	1	1	1	1	1	1	1
Anogam_AGAP006057	Anogam_AGAP006057-RA	1	1	1	1	1	1	1	1	1	1	1	1
Anogam_AGAP006058	Anogam_AGAP006058-RA	nan	1	1	1	1	1	nan	1	nan	1	1	1
Anogam_AGAP006059	Anogam_AGAP006059-RA	1	1	1	1	1	1	1	1	1	1	1	1
Anogam_AGAP006060	Anogam_AGAP006060-RA	nan	nan	nan	nan	nan	nan	nan	nan	nan	1	1	nan
Anogam_AGAP006062	Anogam_AGAP006062-RA	1	1	1	1	1	1	1	1	1	1	1	1
Anogam_AGAP006064	Anogam_AGAP006064-RA	1	1	1	1	1	1	1	1	1	1	1	1
Anogam_AGAP006068	Anogam_AGAP006068-RB	0.388881	0.360118	0.237719	0.452859	0.480524	0.26504	0	0.0451754	0	0.109182	0.290131	0.247214
Anogam_AGAP006068	Anogam_AGAP006068-RC	0.261036	0.166743	0.415534	0.306867	0.221586	0.45575	0.655823	0.488861	0.5315	0.573298	0.421227	0.474246
Anogam_AGAP006068	Anogam_AGAP006068-RA	0.350083	0.473139	0.346747	0.240274	0.297889	0.279211	0.344177	0.465964	0.4685	0.31752	0.288642	0.278541
Anogam_AGAP006069	Anogam_AGAP006069-RA	1	1	1	1	nan	1	nan	1	nan	1	1	1
Anogam_AGAP006072	Anogam_AGAP006072-RA	1	1	1	1	1	1	1	1	1	1	1	1
Anogam_AGAP006074	Anogam_AGAP006074-RA	1	1	1	1	nan	1	nan	nan	nan	1	nan	nan
Anogam_AGAP006082	Anogam_AGAP006082-RA	1	1	1	1	1	1	1	1	1	1	1	1
Anogam_AGAP006083	Anogam_AGAP006083-RA	0	0	0	0.279097	0	0	0	0	0	0	0	0
Anogam_AGAP006083	Anogam_AGAP006083-RB	1	1	1	0.720903	1	1	1	1	1	1	1	1
Anogam_AGAP006085	Anogam_AGAP006085-RA	1	1	1	1	1	1	1	1	1	1	1	1
Anogam_AGAP006087	Anogam_AGAP006087-RA	nan	nan	nan	1	1	nan	nan	nan	nan	1	1	1
Anogam_AGAP006088	Anogam_AGAP006088-RA	1	1	1	1	1	1	1	1	1	1	1	1
Anogam_AGAP006090	Anogam_AGAP006090-RA	1	1	1	1	1	1	1	1	1	1	1	1
Anogam_AGAP006092	Anogam_AGAP006092-RA	1	1	1	1	1	1	1	1	1	1	1	1
Anogam_AGAP006093	Anogam_AGAP006093-RA	1	1	1	1	1	1	1	1	1	1	1	1
Anogam_AGAP006095	Anogam_AGAP006095-RA	nan	nan	1	1	1	1	nan	nan	nan	1	1	1
Anogam_AGAP006096	Anogam_AGAP006096-RA	1	1	1	1	1	1	1	1	1	1	1	1
Anogam_AGAP006097	Anogam_AGAP006097-RA	0.848464	0.93016	0.972128	0.919641	0.88597	0.857411	0.94786	0.906922	0.809642	0.905554	0.862712	0.81754
Anogam_AGAP006097	Anogam_AGAP006097-RB	0.151536	0.06984	0.0278724	0.0803591	0.11403	0.142589	0.05214	0.0930782	0.190358	0.094446	0.137288	0.18246
Anogam_AGAP006100	Anogam_AGAP006100-RA	1	1	1	1	1	1	1	1	1	1	1	1
Anogam_AGAP006105	Anogam_AGAP006105-RA	1	1	1	1	1	1	1	1	1	1	1	1
Anogam_AGAP006109	Anogam_AGAP006109-RA	1	1	1	1	1	1	1	1	1	1	1	1
Anogam_AGAP028452	Anogam_AGAP028452-RA	1	1	1	1	1	1	1	1	1	1	1	1
Anogam_AGAP006118	Anogam_AGAP006118-RA	1	1	1	1	1	1	1	1	1	1	1	1
Anogam_AGAP006119	Anogam_AGAP006119-RA	1	1	1	1	1	1	1	1	1	1	1	1
Anogam_AGAP006120	Anogam_AGAP006120-RA	1	1	1	1	1	1	1	1	1	1	1	1
Anogam_AGAP006121	Anogam_AGAP006121-RA	1	1	1	1	1	1	1	1	1	1	1	1
Anogam_AGAP006127	Anogam_AGAP006127-RA	1	1	1	1	1	1	1	1	1	1	1	1
Anogam_AGAP006129	Anogam_AGAP006129-RA	1	1	1	1	1	1	1	1	1	1	1	1
Anogam_AGAP006130	Anogam_AGAP006130-RA	1	1	1	1	1	1	1	1	1	1	1	1
Anogam_AGAP006132	Anogam_AGAP006132-RA	1	1	1	1	1	1	1	1	1	1	1	1
Anogam_AGAP006133	Anogam_AGAP006133-RA	0.570039	0.685304	0.789607	0.641956	0.475646	0.463908	0.505036	0.513847	0.555436	0.785311	0.489314	0.63372
Anogam_AGAP006133	Anogam_AGAP006133-RB	0.429961	0.314696	0.210393	0.358044	0.524354	0.536092	0.494964	0.486153	0.444564	0.214689	0.510686	0.36628
Anogam_AGAP006134	Anogam_AGAP006134-RA	nan	1	nan	1	1	1	1	nan	1	1	1	1
Anogam_AGAP006136	Anogam_AGAP006136-RA	1	1	1	1	1	1	1	1	1	1	1	1
Anogam_AGAP006141	Anogam_AGAP006141-RB	0.289032	0.344772	0.338033	0.359483	0.278437	0.296353	0.10119	0.244082	0.335321	0.289496	0.293056	0.281774
Anogam_AGAP006141	Anogam_AGAP006141-RA	0.710968	0.655228	0.661967	0.640517	0.721563	0.703647	0.89881	0.755918	0.664679	0.710504	0.706944	0.718226
Anogam_AGAP006143	Anogam_AGAP006143-RE	0	0.09065	0.376408	0	0.437594	0	0	nan	1	0.185383	0.356758	0.59212
Anogam_AGAP006143	Anogam_AGAP006143-RC	0.706825	0.30641	0.0456275	1	0.562406	0	0.912288	nan	0	0.17999	0.265283	0.194373
Anogam_AGAP006143	Anogam_AGAP006143-RA	0.0679487	0	0	0	0	0.242378	0.0877121	nan	0	0	0.12683	0.0678705
Anogam_AGAP006143	Anogam_AGAP006143-RB	0	0	0	0	0	0.502581	0	nan	0	0.0358675	0	0.008802
Anogam_AGAP006143	Anogam_AGAP006143-RD	0	0.133027	0.0923023	0	0	0.255041	0	nan	0	0.254765	0.0805923	0.0804248
Anogam_AGAP006143	Anogam_AGAP006143-RF	0.225226	0.469913	0.485662	0	0	0	0	nan	0	0.343995	0.170537	0.056409
Anogam_AGAP006145	Anogam_AGAP006145-RA	nan	nan	nan	1	nan	nan	nan	nan	1	1	1	1
Anogam_AGAP006147	Anogam_AGAP006147-RA	1	nan	nan	nan	nan	nan	1	1	1	1	1	1
Anogam_AGAP006148	Anogam_AGAP006148-RA	nan	1	1	nan	nan	nan	nan	nan	nan	nan	nan	nan
Anogam_AGAP006149	Anogam_AGAP006149-RA	nan	1	1	nan	1	nan	1	nan	1	1	1	1
Anogam_AGAP006150	Anogam_AGAP006150-RA	nan	nan	nan	nan	nan	nan	nan	nan	nan	nan	nan	nan
Anogam_AGAP006157	Anogam_AGAP006157-RA	nan	nan	nan	nan	1	nan	1	nan	1	1	nan	1
Anogam_AGAP006158	Anogam_AGAP006158-RA	nan	1	1	1	1	1	nan	1	1	1	1	1
Anogam_AGAP006159	Anogam_AGAP006159-RA	1	1	1	1	1	1	1	1	1	1	1	1
Anogam_AGAP006162	Anogam_AGAP006162-RA	1	1	1	1	1	1	1	1	1	1	1	1
Anogam_AGAP006164	Anogam_AGAP006164-RA	1	1	1	1	1	1	1	1	1	1	1	1
Anogam_AGAP006166	Anogam_AGAP006166-RA	1	1	1	1	1	1	1	1	1	1	1	1
Anogam_AGAP006169	Anogam_AGAP006169-RA	1	1	1	1	1	1	1	nan	nan	1	1	1
Anogam_AGAP006173	Anogam_AGAP006173-RA	1	1	1	1	1	1	1	1	1	1	1	1
Anogam_AGAP006175	Anogam_AGAP006175-RA	1	1	1	1	1	1	1	1	1	1	1	1
Anogam_AGAP006176	Anogam_AGAP006176-RA	0	1	nan	0.0939464	0.776633	1	nan	0	0.0638334	1	1	0.735681
Anogam_AGAP006176	Anogam_AGAP006176-RB	1	0	nan	0.906054	0.223367	0	nan	1	0.936167	0	0	0.264319
Anogam_AGAP006177	Anogam_AGAP006177-RA	1	1	1	1	1	1	1	1	1	1	1	1
Anogam_AGAP006178	Anogam_AGAP006178-RB	0	0	0	0	0	0	0	0	0	0	0	0
Anogam_AGAP006178	Anogam_AGAP006178-RC	0	0	0	0	0	0	0	0	0	0	0	0
Anogam_AGAP006178	Anogam_AGAP006178-RA	1	1	1	1	1	1	1	1	1	1	1	1
Anogam_AGAP006179	Anogam_AGAP006179-RA	0	0.116042	0	0	0	0	0	0	0	0	0	0.0705099
Anogam_AGAP006179	Anogam_AGAP006179-RC	0.073657	0.397813	0	1	1	0	0.186801	0.195005	0.161776	0.429122	0.457781	0.364129
Anogam_AGAP006179	Anogam_AGAP006179-RB	0.926343	0.486145	1	0	0	1	0.813199	0.804995	0.838224	0.570878	0.542219	0.565361
Anogam_AGAP006180	Anogam_AGAP006180-RA	nan	nan	nan	1	1	1	1	nan	1	1	1	1
Anogam_AGAP006183	Anogam_AGAP006183-RA	1	1	1	1	1	1	1	1	1	1	1	1
Anogam_AGAP006185	Anogam_AGAP006185-RA	1	1	1	1	nan	1	nan	nan	nan	1	1	nan
Anogam_AGAP006188	Anogam_AGAP006188-RB	0.586831	0.647076	0.959176	0.940235	0.856447	0.843616	0.940487	0.630674	0.482054	0.675327	0.782872	0.605248
Anogam_AGAP006188	Anogam_AGAP006188-RA	0.413169	0.352924	0.0408239	0.0597655	0.143553	0.156384	0.0595135	0.369326	0.517946	0.324673	0.217128	0.394752
Anogam_AGAP006190	Anogam_AGAP006190-RA	1	1	1	1	1	1	1	1	1	1	1	1
Anogam_AGAP006192	Anogam_AGAP006192-RA	1	1	1	1	1	1	1	1	1	1	1	1
Anogam_AGAP006193	Anogam_AGAP006193-RA	1	1	1	1	1	1	1	1	1	1	1	1
Anogam_AGAP006194	Anogam_AGAP006194-RA	1	1	1	1	1	1	1	1	1	1	1	1
Anogam_AGAP006195	Anogam_AGAP006195-RA	nan	nan	1	nan	1	nan	nan	1	1	1	1	1
Anogam_AGAP006196	Anogam_AGAP006196-RA	nan	nan	nan	1	nan	nan	nan	nan	nan	1	1	1
Anogam_AGAP006197	Anogam_AGAP006197-RA	nan	nan	nan	1	nan	nan	nan	nan	1	1	1	1
Anogam_AGAP006198	Anogam_AGAP006198-RA	nan	nan	nan	nan	nan	nan	nan	nan	1	nan	nan	nan
Anogam_AGAP006199	Anogam_AGAP006199-RA	nan	nan	1	1	nan	nan	nan	nan	1	1	1	1
Anogam_AGAP006200	Anogam_AGAP006200-RA	nan	1	nan	nan	nan	nan	1	nan	nan	nan	nan	nan
Anogam_AGAP006201	Anogam_AGAP006201-RA	nan	1	nan	nan	nan	nan	nan	nan	1	nan	nan	nan
Anogam_AGAP006202	Anogam_AGAP006202-RA	nan	1	1	1	nan	1	1	1	1	1	1	1
Anogam_AGAP006203	Anogam_AGAP006203-RA	1	1	1	1	1	1	1	1	1	1	1	1
Anogam_AGAP006204	Anogam_AGAP006204-RA	1	1	1	1	1	1	1	1	1	1	1	1
Anogam_AGAP006206	Anogam_AGAP006206-RA	0.0571565	0.323642	0.239925	0.13693	0.0266617	0.0675606	0	0.00242196	0.000381587	0.0761448	0.0970773	0.0634734
Anogam_AGAP006206	Anogam_AGAP006206-RB	0.942843	0.676358	0.760075	0.86307	0.973338	0.932439	1	0.997578	0.999618	0.923855	0.902923	0.936527
Anogam_AGAP006210	Anogam_AGAP006210-RA	1	nan	1	1	nan	nan	nan	1	nan	1	nan	nan
Anogam_AGAP006211	Anogam_AGAP006211-RA	1	1	nan	1	1	1	1	1	nan	1	1	1
Anogam_AGAP006212	Anogam_AGAP006212-RA	nan	nan	nan	1	1	1	nan	nan	nan	1	1	1
Anogam_AGAP006213	Anogam_AGAP006213-RA	nan	1	nan	1	1	1	nan	nan	1	1	1	1
Anogam_AGAP028453	Anogam_AGAP028453-RA	1	1	1	1	1	1	1	1	1	1	1	1
Anogam_AGAP006214	Anogam_AGAP006214-RA	1	1	1	1	1	1	nan	1	nan	1	1	1
Anogam_AGAP006215	Anogam_AGAP006215-RA	1	1	1	1	1	1	1	1	1	1	1	1
Anogam_AGAP006216	Anogam_AGAP006216-RA	0.922109	0.933167	0.92998	0.911516	0.910869	0.911731	0.910916	0.935942	0.870365	0.838104	0.776751	0.880863
Anogam_AGAP006216	Anogam_AGAP006216-RB	0.0778907	0.0668326	0.0700197	0.0884844	0.0891306	0.0882692	0.0890843	0.0640575	0.129635	0.161896	0.223249	0.119137
Anogam_AGAP006217	Anogam_AGAP006217-RA	1	1	1	1	1	1	1	1	1	1	1	1
Anogam_AGAP006218	Anogam_AGAP006218-RA	1	1	1	1	1	1	1	1	1	1	1	1
Anogam_AGAP006227	Anogam_AGAP006227-RA	1	1	1	1	1	1	1	1	1	1	1	1
Anogam_AGAP006232	Anogam_AGAP006232-RA	1	1	1	1	1	1	1	1	1	1	1	1
Anogam_AGAP006235	Anogam_AGAP006235-RA	1	1	1	1	1	1	1	1	1	1	1	1
Anogam_AGAP006236	Anogam_AGAP006236-RA	1	1	1	1	1	1	1	1	1	1	1	1
Anogam_AGAP006237	Anogam_AGAP006237-RA	1	1	1	1	1	1	1	1	1	1	1	1
Anogam_AGAP006240	Anogam_AGAP006240-RA	1	1	1	1	1	1	1	1	1	1	1	1
Anogam_AGAP006243	Anogam_AGAP006243-RA	1	1	1	1	1	1	1	1	1	1	1	1
Anogam_AGAP029069	Anogam_AGAP029069-RA	1	1	1	1	1	1	1	1	1	1	1	1
Anogam_AGAP006245	Anogam_AGAP006245-RA	1	1	1	1	1	1	1	1	1	1	1	1
Anogam_AGAP006246	Anogam_AGAP006246-RA	1	1	1	1	1	1	1	1	1	1	1	1
Anogam_AGAP006249	Anogam_AGAP006249-RA	1	1	1	1	1	1	1	1	1	1	1	1
Anogam_AGAP006251	Anogam_AGAP006251-RA	1	1	1	1	1	1	1	1	1	1	1	1
Anogam_AGAP006254	Anogam_AGAP006254-RA	0.450455	0.433543	0.407979	0.367761	0.401401	0.414636	0.491763	0.436809	0.47806	0.418065	0.30037	0.239092
Anogam_AGAP006254	Anogam_AGAP006254-RC	0.29578	0.241294	0.247383	0.303669	0.299551	0.213526	0.341375	0.326535	0.351145	0.337641	0.317319	0.344179
Anogam_AGAP006254	Anogam_AGAP006254-RB	0.253765	0.325163	0.344638	0.32857	0.299048	0.371838	0.166863	0.236656	0.170794	0.244293	0.382311	0.416729
Anogam_AGAP006256	Anogam_AGAP006256-RA	1	1	1	1	1	1	1	1	1	1	1	1
Anogam_AGAP028399	Anogam_AGAP028399-RA	nan	1	1	1	1	1	nan	nan	1	nan	1	1
Anogam_AGAP006257	Anogam_AGAP006257-RA	1	1	nan	1	1	nan	1	1	1	1	1	1
Anogam_AGAP006258	Anogam_AGAP006258-RA	1	1	1	1	1	1	1	1	1	1	1	1
Anogam_AGAP006259	Anogam_AGAP006259-RA	1	1	nan	nan	1	1	1	1	1	1	1	1
Anogam_AGAP006260	Anogam_AGAP006260-RD	0.730361	0	0.662487	1	0.491077	0.866226	0.76469	0.660813	0.639378	0.745865	0.738756	0.680972
Anogam_AGAP006260	Anogam_AGAP006260-RA	0	0	0.337513	0	0.314561	0.133774	0.0150138	0	0.0612564	0.037543	0	0.0158683
Anogam_AGAP006260	Anogam_AGAP006260-RB	0.0623076	0	0	0	0.194361	0	0.0848211	0.11046	0.131322	0.143774	0.198218	0.117395
Anogam_AGAP006260	Anogam_AGAP006260-RC	0.207331	1	0	0	0	0	0.135475	0.228727	0.168044	0.0728182	0.0630262	0.185765
Anogam_AGAP006261	Anogam_AGAP006261-RA	1	nan	nan	nan	nan	nan	nan	1	1	nan	nan	nan
Anogam_AGAP006262	Anogam_AGAP006262-RA	1	nan	nan	nan	nan	nan	1	1	1	nan	nan	1
Anogam_AGAP006263	Anogam_AGAP006263-RA	1	1	1	1	1	1	1	1	1	1	1	1
Anogam_AGAP006265	Anogam_AGAP006265-RA	1	1	1	1	1	1	1	1	1	1	1	1
Anogam_AGAP006267	Anogam_AGAP006267-RA	1	1	1	1	1	1	1	1	1	1	1	1
Anogam_AGAP006268	Anogam_AGAP006268-RA	nan	1	nan	nan	1	nan	nan	1	1	1	nan	1
Anogam_AGAP006269	Anogam_AGAP006269-RA	1	1	1	1	1	1	1	1	1	1	1	1
Anogam_AGAP006270	Anogam_AGAP006270-RA	1	1	1	1	1	1	1	1	1	1	1	1
Anogam_AGAP006271	Anogam_AGAP006271-RA	1	1	1	1	1	1	1	1	1	1	1	1
Anogam_AGAP006273	Anogam_AGAP006273-RA	1	1	1	1	1	1	1	1	1	1	1	1
Anogam_AGAP029191	Anogam_AGAP029191-RA	1	1	1	1	1	1	1	1	1	1	1	1
Anogam_AGAP006280	Anogam_AGAP006280-RA	1	1	1	1	1	1	1	1	1	1	1	1
Anogam_AGAP013248	Anogam_AGAP013248-RA	nan	1	nan	nan	nan	nan	nan	nan	nan	1	nan	1
Anogam_AGAP006283	Anogam_AGAP006283-RB	nan	nan	nan	nan	nan	nan	nan	nan	nan	nan	1	nan
Anogam_AGAP006284	Anogam_AGAP006284-RA	nan	nan	nan	nan	nan	nan	nan	nan	nan	nan	nan	nan
Anogam_AGAP006285	Anogam_AGAP006285-RA	nan	nan	nan	nan	nan	nan	nan	nan	nan	nan	nan	nan
Anogam_AGAP006286	Anogam_AGAP006286-RA	nan	nan	nan	nan	nan	nan	nan	nan	nan	nan	nan	nan
Anogam_AGAP006288	Anogam_AGAP006288-RA	nan	nan	nan	nan	nan	nan	nan	nan	1	nan	nan	nan
Anogam_AGAP006290	Anogam_AGAP006290-RA	nan	nan	nan	nan	nan	nan	nan	nan	nan	nan	nan	nan
Anogam_AGAP006297	Anogam_AGAP006297-RA	nan	nan	nan	nan	nan	nan	nan	nan	1	nan	nan	nan
Anogam_AGAP006299	Anogam_AGAP006299-RA	nan	nan	nan	nan	nan	nan	nan	nan	nan	nan	nan	nan
Anogam_AGAP006301	Anogam_AGAP006301-RA	nan	nan	nan	nan	nan	nan	nan	nan	nan	nan	nan	nan
Anogam_AGAP006317	Anogam_AGAP006317-RA	nan	nan	nan	nan	nan	nan	nan	nan	nan	nan	nan	nan
Anogam_AGAP006321	Anogam_AGAP006321-RA	nan	nan	nan	nan	nan	1	nan	nan	nan	nan	nan	1
Anogam_AGAP006324	Anogam_AGAP006324-RA	nan	1	1	1	1	nan	nan	1	nan	1	1	1
Anogam_AGAP006325	Anogam_AGAP006325-RA	1	nan	nan	1	1	nan	nan	1	1	1	1	1
Anogam_AGAP006339	Anogam_AGAP006339-RA	1	1	1	1	1	1	1	1	1	1	1	1
Anogam_AGAP006342	Anogam_AGAP006342-RA	1	1	nan	nan	1	1	1	1	1	1	1	1
Anogam_AGAP006344	Anogam_AGAP006344-RA	1	1	1	1	1	1	1	1	1	1	1	1
Anogam_AGAP006346	Anogam_AGAP006346-RA	0.120036	0.00217591	0.0455978	0.0557401	0.0225049	0.0439967	0.172599	0.398979	0.343767	0.0327208	0.0639586	0.0153408
Anogam_AGAP006346	Anogam_AGAP006346-RB	0.14939	0.279905	0.349681	0.428553	0.387413	0.404388	4.24124e-07	0	0.156233	0.24767	0.300193	0.282292
Anogam_AGAP006346	Anogam_AGAP006346-RC	0.730574	0.717919	0.604721	0.515707	0.590082	0.551615	0.827401	0.601021	0.5	0.719609	0.635849	0.702368
Anogam_AGAP006347	Anogam_AGAP006347-RA	0.888889	0.794118	0.8	1	1	0.857143	1	1	1	0.846154	0.842105	0.574468
Anogam_AGAP006347	Anogam_AGAP006347-RB	0.111111	0.205882	0.2	0	0	0.142857	0	0	0	0.153846	0.157895	0.425532
Anogam_AGAP006348	Anogam_AGAP006348-RA	1	1	1	1	1	1	1	1	1	1	1	1
Anogam_AGAP006354	Anogam_AGAP006354-RA	1	1	1	1	1	1	1	1	1	1	1	1
Anogam_AGAP006357	Anogam_AGAP006357-RA	1	1	1	1	1	1	1	1	1	1	1	1
Anogam_AGAP006359	Anogam_AGAP006359-RA	1	1	1	1	1	1	1	1	1	1	1	1
Anogam_AGAP006366	Anogam_AGAP006366-RB	0.0251197	0.0269838	0.0703767	0.0335545	0.0653668	0.0220728	0.0277271	0.0371966	0.0274169	0.0301899	0.0134101	0.0201588
Anogam_AGAP006366	Anogam_AGAP006366-RC	0.580304	0.71309	0.651754	0.627364	0.588134	0.632631	0.371896	0.620562	0.669963	0.402138	0.506826	0.807836
Anogam_AGAP006366	Anogam_AGAP006366-RD	0.122133	0.117391	0.00171207	0.0902271	0.145909	0.131677	0.36085	0.15265	0.117567	0.26163	0.175726	0.0299036
Anogam_AGAP006366	Anogam_AGAP006366-RA	0.272444	0.13055	0.276158	0.248855	0.200591	0.213619	0.239524	0.189572	0.185052	0.306042	0.29842	0.142102
Anogam_AGAP006366	Anogam_AGAP006366-RE	0	0.0119856	0	0	0	0	3.0647e-06	1.9436e-05	1.37931e-06	0	0.00561798	0
Anogam_AGAP006367	Anogam_AGAP006367-RA	1	1	1	1	1	1	1	1	1	1	1	1
Anogam_AGAP006371	Anogam_AGAP006371-RA	nan	1	nan	nan	nan	nan	1	nan	1	1	1	1
Anogam_AGAP006373	Anogam_AGAP006373-RA	1	1	1	1	1	1	1	1	1	1	1	1
Anogam_AGAP006379	Anogam_AGAP006379-RA	1	1	1	1	1	1	1	1	1	1	1	1
Anogam_AGAP006380	Anogam_AGAP006380-RA	1	1	1	1	1	1	1	1	1	1	1	1
Anogam_AGAP006383	Anogam_AGAP006383-RA	1	1	1	1	1	1	1	1	1	1	1	1
Anogam_AGAP006385	Anogam_AGAP006385-RA	1	1	1	1	1	1	1	1	1	1	1	1
Anogam_AGAP006387	Anogam_AGAP006387-RA	1	1	1	1	1	1	1	1	1	1	1	1
Anogam_AGAP006389	Anogam_AGAP006389-RA	1	1	1	1	1	1	1	1	1	1	1	1
Anogam_AGAP006392	Anogam_AGAP006392-RA	1	1	1	1	1	1	1	1	1	1	1	1
Anogam_AGAP006394	Anogam_AGAP006394-RA	1	1	1	1	1	1	1	1	1	1	1	1
Anogam_AGAP006395	Anogam_AGAP006395-RA	nan	nan	nan	1	1	1	nan	nan	nan	1	1	1
Anogam_AGAP006396	Anogam_AGAP006396-RA	1	1	1	nan	nan	1	1	1	nan	1	1	1
Anogam_AGAP006399	Anogam_AGAP006399-RA	1	1	1	1	1	1	1	1	1	1	1	1
Anogam_AGAP006402	Anogam_AGAP006402-RA	1	1	1	1	1	1	1	1	1	1	1	1
Anogam_AGAP006404	Anogam_AGAP006404-RA	1	1	1	1	1	1	1	1	1	1	1	1
Anogam_AGAP006405	Anogam_AGAP006405-RA	1	1	nan	1	1	nan	nan	1	1	1	1	1
Anogam_AGAP006406	Anogam_AGAP006406-RA	nan	nan	nan	1	1	1	nan	nan	nan	1	1	1
Anogam_AGAP006408	Anogam_AGAP006408-RA	1	1	1	1	1	1	1	1	1	1	1	1
Anogam_AGAP006413	Anogam_AGAP006413-RA	1	1	1	1	1	1	1	1	1	1	1	1
Anogam_AGAP006414	Anogam_AGAP006414-RA	1	1	1	1	1	1	1	1	1	1	1	1
Anogam_AGAP006415	Anogam_AGAP006415-RA	1	1	nan	nan	1	1	1	nan	1	1	1	1
Anogam_AGAP006417	Anogam_AGAP006417-RA	1	1	nan	nan	1	nan	1	nan	1	1	1	1
Anogam_AGAP006422	Anogam_AGAP006422-RA	1	1	1	1	1	1	1	1	1	1	1	1
Anogam_AGAP006423	Anogam_AGAP006423-RA	1	1	1	1	nan	nan	1	1	1	1	1	1
Anogam_AGAP006424	Anogam_AGAP006424-RA	1	1	1	1	1	1	1	1	1	1	1	1
Anogam_AGAP006425	Anogam_AGAP006425-RA	1	1	1	1	1	1	1	1	1	1	1	1
Anogam_AGAP006426	Anogam_AGAP006426-RA	1	1	1	1	1	1	1	1	1	1	1	1
Anogam_AGAP006427	Anogam_AGAP006427-RA	1	1	1	1	1	1	1	1	1	1	1	1
Anogam_AGAP006427	Anogam_AGAP006427-RB	0	0	0	0	0	0	0	0	0	0	0	0
Anogam_AGAP006428	Anogam_AGAP006428-RA	1	1	1	1	1	1	1	1	1	1	1	1
Anogam_AGAP006431	Anogam_AGAP006431-RA	1	1	1	1	1	1	1	1	1	1	1	1
Anogam_AGAP006433	Anogam_AGAP006433-RA	1	1	1	nan	nan	1	1	1	1	1	1	1
Anogam_AGAP006435	Anogam_AGAP006435-RA	nan	nan	nan	nan	nan	nan	nan	nan	nan	1	nan	1
Anogam_AGAP028457	Anogam_AGAP028457-RA	nan	1	nan	1	1	1	nan	nan	1	1	1	1
Anogam_AGAP006438	Anogam_AGAP006438-RA	1	1	1	1	1	1	1	1	1	1	1	1
Anogam_AGAP006439	Anogam_AGAP006439-RA	1	1	1	1	1	1	1	1	1	1	1	1
Anogam_AGAP029172	Anogam_AGAP029172-RA	1	nan	nan	nan	nan	nan	1	1	nan	1	nan	1
Anogam_AGAP006440	Anogam_AGAP006440-RA	nan	nan	nan	nan	nan	nan	nan	nan	nan	nan	1	nan
Anogam_AGAP029154	Anogam_AGAP029154-RA	nan	nan	1	nan	nan	nan	nan	nan	nan	1	1	nan
Anogam_AGAP006441	Anogam_AGAP006441-RA	0.546691	0.19903	0.444105	0.200594	0.307283	0.934315	0.695824	0.655883	0.578576	0.345465	0.268274	0.296057
Anogam_AGAP006441	Anogam_AGAP006441-RB	0.453309	0.80097	0.555895	0.799406	0.692717	0.0656848	0.304176	0.344117	0.421424	0.654535	0.731726	0.703943
Anogam_AGAP006443	Anogam_AGAP006443-RA	1	nan	nan	1	1	1	nan	nan	nan	1	1	1
Anogam_AGAP006445	Anogam_AGAP006445-RA	1	1	1	1	1	1	1	1	1	1	1	1
Anogam_AGAP006448	Anogam_AGAP006448-RB	0.0326229	0.0965193	0.0437191	0.022773	0.0139799	0.0412466	0.0165977	0.0795611	0.0983184	0.0708919	0.029542	0.0499886
Anogam_AGAP006448	Anogam_AGAP006448-RC	0.0150348	0.0576019	0.0406741	0.0799266	0.0175628	0.0217506	0	0	0.00943886	0.00423153	0.0105965	0.0183019
Anogam_AGAP006448	Anogam_AGAP006448-RD	0	0	0.00698636	0	0.0844149	0	0	0	0	0.0281592	0.0163489	0.00501867
Anogam_AGAP006448	Anogam_AGAP006448-RA	0.952342	0.845879	0.90862	0.8973	0.884042	0.937003	0.983402	0.920439	0.892243	0.896717	0.943513	0.926691
Anogam_AGAP006449	Anogam_AGAP006449-RA	1	nan	1	1	1	1	nan	1	nan	1	1	1
Anogam_AGAP006450	Anogam_AGAP006450-RA	1	nan	1	1	1	1	nan	1	nan	1	1	1
Anogam_AGAP006451	Anogam_AGAP006451-RA	1	1	1	1	1	1	1	1	1	1	1	1
Anogam_AGAP006453	Anogam_AGAP006453-RA	1	1	1	1	1	1	1	1	1	1	1	1
Anogam_AGAP006454	Anogam_AGAP006454-RA	1	1	1	1	1	1	1	1	1	1	1	1
Anogam_AGAP006457	Anogam_AGAP006457-RA	1	1	1	1	1	1	1	1	1	1	1	1
Anogam_AGAP006458	Anogam_AGAP006458-RA	1	1	1	1	1	1	1	1	1	1	1	1
Anogam_AGAP006468	Anogam_AGAP006468-RA	1	1	1	1	1	nan	nan	nan	1	1	1	1
Anogam_AGAP006470	Anogam_AGAP006470-RA	1	1	1	1	1	1	1	1	1	1	1	1
Anogam_AGAP013092	Anogam_AGAP013092-RA	1	1	1	1	1	1	1	1	1	1	1	1
Anogam_AGAP006471	Anogam_AGAP006471-RA	1	1	1	1	1	1	1	1	1	1	1	1
Anogam_AGAP006475	Anogam_AGAP006475-RA	1	1	1	1	1	1	1	1	1	1	1	1
Anogam_AGAP006480	Anogam_AGAP006480-RA	0.907124	1	0	0.744812	0.773649	0.892729	0.725077	0.619623	0.696233	0.789909	0.800005	0.7016
Anogam_AGAP006480	Anogam_AGAP006480-RB	0.0928765	0	1	0.255188	0.226351	0.107271	0.274923	0.380377	0.303767	0.210091	0.199995	0.2984
Anogam_AGAP006481	Anogam_AGAP006481-RA	nan	nan	nan	nan	nan	nan	nan	nan	nan	nan	1	nan
Anogam_AGAP006482	Anogam_AGAP006482-RA	nan	nan	nan	1	1	1	nan	nan	nan	1	1	1
Anogam_AGAP006483	Anogam_AGAP006483-RA	1	1	nan	nan	1	1	nan	nan	nan	1	1	1
Anogam_AGAP028657	Anogam_AGAP028657-RA	nan	nan	nan	nan	nan	nan	nan	nan	1	nan	1	nan
Anogam_AGAP006486	Anogam_AGAP006486-RA	nan	nan	nan	nan	nan	nan	nan	nan	nan	1	nan	nan
Anogam_AGAP006488	Anogam_AGAP006488-RA	nan	nan	nan	nan	nan	nan	nan	1	nan	nan	nan	nan
Anogam_AGAP006489	Anogam_AGAP006489-RA	nan	nan	nan	nan	nan	nan	nan	nan	nan	nan	nan	1
Anogam_AGAP028656	Anogam_AGAP028656-RA	nan	nan	nan	nan	nan	nan	nan	nan	nan	nan	nan	nan
Anogam_AGAP006490	Anogam_AGAP006490-RA	1	1	nan	1	1	nan	1	1	1	1	1	1
Anogam_AGAP006494	Anogam_AGAP006494-RA	1	1	1	1	1	1	1	1	1	1	1	1
Anogam_AGAP006495	Anogam_AGAP006495-RA	1	1	1	1	nan	1	nan	nan	1	nan	nan	1
Anogam_AGAP006496	Anogam_AGAP006496-RA	1	1	nan	nan	1	1	1	1	nan	1	1	1
Anogam_AGAP006499	Anogam_AGAP006499-RA	nan	nan	nan	nan	1	nan	nan	nan	1	1	1	1
Anogam_AGAP006500	Anogam_AGAP006500-RA	nan	nan	nan	nan	nan	nan	nan	nan	nan	nan	nan	1
Anogam_AGAP006501	Anogam_AGAP006501-RA	1	1	1	nan	nan	nan	1	1	1	1	1	1
Anogam_AGAP006502	Anogam_AGAP006502-RA	nan	nan	nan	nan	nan	nan	1	nan	nan	nan	nan	1
Anogam_AGAP006503	Anogam_AGAP006503-RA	nan	nan	nan	nan	nan	nan	nan	nan	nan	nan	1	1
Anogam_AGAP006504	Anogam_AGAP006504-RA	1	1	nan	nan	1	1	nan	nan	nan	1	nan	1
Anogam_AGAP006505	Anogam_AGAP006505-RA	nan	nan	nan	nan	nan	nan	nan	nan	nan	nan	nan	nan
Anogam_AGAP006506	Anogam_AGAP006506-RA	1	1	nan	1	1	1	nan	1	1	1	1	1
Anogam_AGAP006508	Anogam_AGAP006508-RB	0.971307	0.97503	0.97286	0.967535	0.979448	0.990214	0.965241	0.944552	0.952195	0.970048	0.96697	0.961799
Anogam_AGAP006508	Anogam_AGAP006508-RA	0.0286927	0.0249704	0.0271403	0.0324646	0.0205517	0.00978578	0.034759	0.0554483	0.0478054	0.0299524	0.0330304	0.038201
Anogam_AGAP006510	Anogam_AGAP006510-RA	1	1	1	1	1	1	1	1	1	1	1	1
Anogam_AGAP006512	Anogam_AGAP006512-RA	1	1	1	1	1	1	1	1	1	1	1	1
Anogam_AGAP006513	Anogam_AGAP006513-RA	1	1	1	1	1	1	1	1	1	1	1	1
Anogam_AGAP006520	Anogam_AGAP006520-RA	1	1	1	1	1	1	1	1	1	1	1	1
Anogam_AGAP006521	Anogam_AGAP006521-RA	nan	1	1	1	1	1	1	1	1	1	1	1
Anogam_AGAP006522	Anogam_AGAP006522-RA	1	1	1	1	1	1	1	1	1	1	1	1
Anogam_AGAP006523	Anogam_AGAP006523-RA	1	nan	1	1	1	1	1	1	1	1	1	1
Anogam_AGAP006524	Anogam_AGAP006524-RA	1	1	1	1	1	1	1	1	1	1	1	1
Anogam_AGAP006525	Anogam_AGAP006525-RA	1	1	1	1	1	1	1	1	1	1	1	1
Anogam_AGAP006526	Anogam_AGAP006526-RA	1	1	1	1	1	1	1	1	1	1	1	1
Anogam_AGAP006527	Anogam_AGAP006527-RA	1	1	1	1	1	1	1	1	1	1	1	1
Anogam_AGAP006529	Anogam_AGAP006529-RA	1	1	1	1	1	1	1	1	1	1	1	1
Anogam_AGAP013364	Anogam_AGAP013364-RA	1	1	1	1	1	1	1	1	1	1	1	1
Anogam_AGAP006530	Anogam_AGAP006530-RA	1	1	1	1	1	1	1	1	1	1	1	1
Anogam_AGAP013488	Anogam_AGAP013488-RA	1	1	1	1	1	1	1	1	1	1	1	1
Anogam_AGAP006531	Anogam_AGAP006531-RA	1	1	1	1	1	1	1	1	1	1	1	1
Anogam_AGAP006534	Anogam_AGAP006534-RB	0.262009	0.251796	0.122297	0.203649	0.183153	0.21779	0.287321	0.276837	0.445054	0.317128	0.286444	0.277514
Anogam_AGAP006534	Anogam_AGAP006534-RA	0.737991	0.748204	0.877703	0.796351	0.816847	0.78221	0.712679	0.723163	0.554946	0.682872	0.713556	0.722486
Anogam_AGAP006542	Anogam_AGAP006542-RA	1	1	1	1	1	1	1	1	1	1	1	1
Anogam_AGAP028608	Anogam_AGAP028608-RA	1	1	1	1	1	1	1	1	1	1	1	1
Anogam_AGAP006549	Anogam_AGAP006549-RA	1	1	1	1	1	1	1	1	1	1	1	1
Anogam_AGAP006550	Anogam_AGAP006550-RA	1	nan	nan	nan	nan	nan	nan	1	1	nan	nan	1
Anogam_AGAP006551	Anogam_AGAP006551-RA	nan	1	nan	nan	nan	nan	nan	nan	nan	nan	nan	1
Anogam_AGAP006552	Anogam_AGAP006552-RA	nan	nan	nan	nan	nan	nan	1	nan	nan	1	nan	nan
Anogam_AGAP006553	Anogam_AGAP006553-RA	nan	nan	nan	1	nan	nan	nan	nan	1	nan	nan	nan
Anogam_AGAP006554	Anogam_AGAP006554-RA	nan	nan	nan	nan	nan	nan	nan	nan	nan	nan	nan	nan
Anogam_AGAP006556	Anogam_AGAP006556-RA	nan	nan	nan	nan	nan	1	nan	nan	nan	nan	nan	nan
Anogam_AGAP006557	Anogam_AGAP006557-RA	nan	nan	nan	nan	nan	1	nan	nan	nan	nan	nan	nan
Anogam_AGAP006558	Anogam_AGAP006558-RA	nan	nan	nan	nan	nan	nan	nan	nan	nan	nan	nan	nan
Anogam_AGAP006559	Anogam_AGAP006559-RA	nan	nan	nan	nan	nan	nan	nan	nan	nan	nan	nan	nan
Anogam_AGAP006562	Anogam_AGAP006562-RA	nan	nan	nan	nan	1	nan	nan	nan	nan	1	1	1
Anogam_AGAP006564	Anogam_AGAP006564-RA	nan	nan	nan	nan	nan	nan	nan	nan	nan	1	nan	1
Anogam_AGAP006566	Anogam_AGAP006566-RA	nan	nan	nan	nan	1	nan	nan	nan	nan	nan	1	1
Anogam_AGAP006567	Anogam_AGAP006567-RA	nan	1	nan	nan	1	nan	nan	nan	nan	nan	nan	nan
Anogam_AGAP006568	Anogam_AGAP006568-RA	nan	nan	nan	1	nan	nan	nan	nan	nan	nan	1	1
Anogam_AGAP006571	Anogam_AGAP006571-RA	1	1	1	1	1	1	nan	1	1	1	1	1
Anogam_AGAP006573	Anogam_AGAP006573-RA	1	1	1	1	1	1	1	1	1	1	1	1
Anogam_AGAP006575	Anogam_AGAP006575-RA	1	1	1	1	1	1	1	1	1	1	1	1
Anogam_AGAP006576	Anogam_AGAP006576-RC	0.1534	0.133182	0.283952	0.014441	0.248748	0.311211	0.103673	0.161075	0.246685	0.116458	0.156804	0.211888
Anogam_AGAP006576	Anogam_AGAP006576-RB	0.475038	0.417	0.519084	0.729134	0.381185	0.525637	0.513612	0.651493	0.370907	0.518563	0.450805	0.384825
Anogam_AGAP006576	Anogam_AGAP006576-RA	0.371562	0.449818	0.196963	0.256425	0.370067	0.163152	0.382715	0.187432	0.382407	0.364978	0.392392	0.403287
Anogam_AGAP006577	Anogam_AGAP006577-RA	1	1	1	1	1	1	1	1	1	1	1	1
Anogam_AGAP006578	Anogam_AGAP006578-RA	1	nan	1	nan	1	nan	1	nan	nan	1	1	nan
Anogam_AGAP006579	Anogam_AGAP006579-RA	0.569039	0.589456	0.753246	0.89966	0.669731	0.320822	0	0.687892	0	0.59032	0.706819	0.734923
Anogam_AGAP006579	Anogam_AGAP006579-RB	0.430961	0.410544	0.246754	0.10034	0.330269	0.679178	1	0.312108	1	0.40968	0.293181	0.265077
Anogam_AGAP006581	Anogam_AGAP006581-RA	1	1	1	1	1	1	1	1	1	1	1	nan
Anogam_AGAP006582	Anogam_AGAP006582-RD	0.514261	0	nan	0	0.233343	0	0	nan	nan	0.392328	0	nan
Anogam_AGAP006582	Anogam_AGAP006582-RA	0.434205	0	nan	0.611938	0.217879	0.100254	0	nan	nan	0	0.114936	nan
Anogam_AGAP006582	Anogam_AGAP006582-RB	0.0515342	0.199098	nan	0	0	0	0	nan	nan	0	0	nan
Anogam_AGAP006582	Anogam_AGAP006582-RC	0	0.800902	nan	0.388062	0.548778	0.899746	1	nan	nan	0.607672	0.885064	nan
Anogam_AGAP006583	Anogam_AGAP006583-RA	1	1	nan	1	1	1	nan	nan	1	nan	1	1
Anogam_AGAP028458	Anogam_AGAP028458-RA	nan	nan	nan	nan	1	1	nan	nan	nan	nan	1	1
Anogam_AGAP006584	Anogam_AGAP006584-RA	1	1	nan	1	1	1	1	nan	1	1	1	1
Anogam_AGAP028459	Anogam_AGAP028459-RA	1	1	nan	1	1	1	nan	nan	1	nan	nan	nan
Anogam_AGAP006585	Anogam_AGAP006585-RA	1	1	nan	1	1	1	nan	nan	1	nan	1	1
Anogam_AGAP006586	Anogam_AGAP006586-RA	1	1	nan	1	nan	nan	nan	1	nan	nan	nan	1
Anogam_AGAP006587	Anogam_AGAP006587-RA	1	nan	nan	nan	1	1	nan	nan	1	nan	1	1
Anogam_AGAP006588	Anogam_AGAP006588-RA	nan	nan	nan	1	1	1	nan	nan	1	nan	1	nan
Anogam_AGAP028666	Anogam_AGAP028666-RA	nan	nan	nan	nan	1	1	1	nan	1	1	1	nan
Anogam_AGAP028665	Anogam_AGAP028665-RA	nan	nan	nan	nan	1	1	nan	nan	nan	nan	1	nan
Anogam_AGAP006590	Anogam_AGAP006590-RC	0.177247	0	0	0	0.0605985	0	0	0	0.466306	0	0.228797	0.176742
Anogam_AGAP006590	Anogam_AGAP006590-RD	0.686169	0.8307	0.709442	0.654684	0.864352	0.64835	1	0.463482	0.533694	0.72361	0.718022	0.735822
Anogam_AGAP006590	Anogam_AGAP006590-RA	0.136584	0.0234038	0	0	0	0.304646	0	0	0	0.152458	0.0531808	0
Anogam_AGAP006590	Anogam_AGAP006590-RB	0	0.145897	0.290558	0.345316	0.0750492	0.0470042	0	0.536518	0	0.123932	0	0.0874358
Anogam_AGAP006591	Anogam_AGAP006591-RA	nan	nan	1	nan	nan	nan	nan	1	1	nan	nan	1
Anogam_AGAP006592	Anogam_AGAP006592-RA	1	1	1	1	1	1	1	1	1	1	1	1
Anogam_AGAP006593	Anogam_AGAP006593-RA	1	1	1	1	1	1	1	1	1	1	1	1
Anogam_AGAP006594	Anogam_AGAP006594-RA	0.187749	0.818386	0.269689	0.304505	0.76401	1	nan	0.968488	0.850596	1	1	1
Anogam_AGAP006594	Anogam_AGAP006594-RB	0.812251	0.181614	0.730311	0.695495	0.23599	0	nan	0.0315116	0.149404	0	0	0
Anogam_AGAP006597	Anogam_AGAP006597-RA	1	nan	nan	nan	nan	nan	1	nan	nan	1	1	nan
Anogam_AGAP006599	Anogam_AGAP006599-RA	1	1	1	1	1	1	1	1	1	1	1	1
Anogam_AGAP006602	Anogam_AGAP006602-RA	1	1	1	1	1	1	1	1	1	1	1	1
Anogam_AGAP006604	Anogam_AGAP006604-RA	1	1	1	1	1	1	1	1	1	1	1	1
Anogam_AGAP006606	Anogam_AGAP006606-RA	1	1	1	1	1	1	1	1	1	1	1	1
Anogam_AGAP006607	Anogam_AGAP006607-RA	1	1	1	1	0.983467	0.995135	1	1	0.984545	1	0.988269	1
Anogam_AGAP006607	Anogam_AGAP006607-RB	0	0	0	0	0.0165327	0.00486526	0	0	0.0154549	0	0.0117309	0
Anogam_AGAP006612	Anogam_AGAP006612-RA	1	1	1	1	1	1	1	1	1	1	1	1
Anogam_AGAP006614	Anogam_AGAP006614-RA	1	1	1	1	1	1	1	1	1	1	1	1
Anogam_AGAP006616	Anogam_AGAP006616-RA	1	1	1	1	1	1	1	1	1	1	1	1
Anogam_AGAP006619	Anogam_AGAP006619-RA	1	1	1	1	1	1	1	1	1	1	1	1
Anogam_AGAP006621	Anogam_AGAP006621-RA	1	1	1	1	1	1	1	1	1	1	1	1
Anogam_AGAP006623	Anogam_AGAP006623-RA	1	1	1	1	1	1	1	1	1	1	1	1
Anogam_AGAP006625	Anogam_AGAP006625-RA	1	1	1	1	1	1	1	1	1	1	1	1
Anogam_AGAP006627	Anogam_AGAP006627-RA	1	1	1	nan	1	1	1	1	nan	1	1	1
Anogam_AGAP006631	Anogam_AGAP006631-RA	1	1	1	1	1	1	1	1	1	1	1	1
Anogam_AGAP006633	Anogam_AGAP006633-RA	0.899692	0.876029	0.923491	0.962507	0.905525	0.980877	1	0.641283	0.558381	0.730754	0.727016	0.755814
Anogam_AGAP006633	Anogam_AGAP006633-RB	0.100308	0.123971	0.0765094	0.0374931	0.0944751	0.0191226	0	0.358717	0.441619	0.269246	0.272984	0.244186
Anogam_AGAP006634	Anogam_AGAP006634-RA	1	1	1	1	1	1	1	1	1	1	1	1
Anogam_AGAP006635	Anogam_AGAP006635-RA	nan	1	1	1	1	1	nan	nan	nan	1	1	nan
Anogam_AGAP006637	Anogam_AGAP006637-RA	0	nan	nan	0	0	0	nan	nan	nan	0	0	0.24822
Anogam_AGAP006637	Anogam_AGAP006637-RB	1	nan	nan	1	1	1	nan	nan	nan	1	1	0.75178
Anogam_AGAP006638	Anogam_AGAP006638-RA	1	1	1	1	1	1	nan	1	nan	1	1	1
Anogam_AGAP006639	Anogam_AGAP006639-RA	nan	nan	nan	nan	nan	nan	nan	nan	nan	nan	nan	nan
Anogam_AGAP006644	Anogam_AGAP006644-RA	1	1	1	1	1	1	1	1	1	1	1	1
Anogam_AGAP006649	Anogam_AGAP006649-RA	1	1	1	1	1	1	1	1	1	1	1	1
Anogam_AGAP006651	Anogam_AGAP006651-RA	1	1	1	1	1	1	1	1	1	1	1	1
Anogam_AGAP006656	Anogam_AGAP006656-RB	0.695332	1	0.712474	0.753935	0.881359	0.808806	0.878516	0.744094	0.786159	0.871312	1	0.824947
Anogam_AGAP006656	Anogam_AGAP006656-RA	0.304668	0	0.287526	0.246065	0.118641	0.191194	0.121484	0.255906	0.213841	0.128688	0	0.175053
Anogam_AGAP006657	Anogam_AGAP006657-RA	1	1	1	1	1	nan	1	1	1	1	1	1
Anogam_AGAP006659	Anogam_AGAP006659-RA	1	1	1	1	1	1	1	1	1	1	1	1
Anogam_AGAP006660	Anogam_AGAP006660-RC	0	0	0.00764357	0	0	0.00684951	0	0.00483267	0	0.00945673	0	0.0035538
Anogam_AGAP006660	Anogam_AGAP006660-RB	0.698828	0.699079	0.703102	0.763584	0.711404	0.769834	0.664779	0.500769	0.616116	0.620752	0.671717	0.596156
Anogam_AGAP006660	Anogam_AGAP006660-RA	0.301172	0.300921	0.289255	0.236416	0.288596	0.223317	0.335221	0.494399	0.383884	0.369792	0.328283	0.40029
Anogam_AGAP006662	Anogam_AGAP006662-RA	1	1	1	1	1	1	1	1	1	1	1	1
Anogam_AGAP006663	Anogam_AGAP006663-RA	1	1	1	1	1	1	1	1	1	1	1	1
Anogam_AGAP006666	Anogam_AGAP006666-RA	1	1	1	1	1	1	1	1	1	1	1	1
Anogam_AGAP006667	Anogam_AGAP006667-RA	1	1	1	1	1	1	1	1	1	1	1	1
Anogam_AGAP006668	Anogam_AGAP006668-RA	1	1	1	1	1	1	1	1	1	1	1	1
Anogam_AGAP006671	Anogam_AGAP006671-RA	1	1	1	1	1	1	1	1	1	1	1	1
Anogam_AGAP006672	Anogam_AGAP006672-RA	1	1	1	nan	1	nan	nan	1	1	1	1	nan
Anogam_AGAP029091	Anogam_AGAP029091-RA	1	nan	1	1	1	1	nan	nan	nan	1	1	1
Anogam_AGAP006678	Anogam_AGAP006678-RA	1	1	1	1	1	1	1	1	1	1	1	1
Anogam_AGAP006681	Anogam_AGAP006681-RA	1	1	1	1	1	1	1	1	1	1	1	1
Anogam_AGAP006682	Anogam_AGAP006682-RA	1	1	1	1	1	1	1	1	1	1	1	1
Anogam_AGAP006684	Anogam_AGAP006684-RA	1	1	1	1	1	1	1	1	1	1	1	1
Anogam_AGAP006687	Anogam_AGAP006687-RA	1	1	1	1	1	1	1	1	1	1	1	1
Anogam_AGAP006689	Anogam_AGAP006689-RA	1	1	1	1	1	1	nan	1	1	1	1	1
Anogam_AGAP006691	Anogam_AGAP006691-RA	1	1	nan	1	1	1	nan	1	nan	nan	1	nan
Anogam_AGAP006696	Anogam_AGAP006696-RA	1	1	1	1	1	1	1	1	1	1	1	1
Anogam_AGAP006698	Anogam_AGAP006698-RA	1	1	1	1	nan	1	1	1	1	1	nan	1
Anogam_AGAP006699	Anogam_AGAP006699-RA	1	1	1	1	1	1	1	1	1	1	1	1
Anogam_AGAP006700	Anogam_AGAP006700-RA	1	nan	1	1	1	1	1	1	1	nan	nan	1
Anogam_AGAP006701	Anogam_AGAP006701-RA	0.567656	0.494289	0.502589	0.63504	0.505816	0.465764	0.478918	0.461126	0.431639	0.386343	0.364889	0.327104
Anogam_AGAP006701	Anogam_AGAP006701-RB	0.376344	0.405106	0.417015	0.220391	0.324788	0.396092	0.416371	0.455107	0.528494	0.549998	0.382181	0.388331
Anogam_AGAP006701	Anogam_AGAP006701-RC	0.055999	0.100606	0.0803955	0.144569	0.169396	0.138144	0.104711	0.0837665	0.0398668	0.0636589	0.252931	0.284566
Anogam_AGAP006702	Anogam_AGAP006702-RB	0.514327	0.385735	0.398409	0.449146	0.621162	0.48981	0.577305	0.602074	0.62099	0.369327	0.297387	0.339206
Anogam_AGAP006702	Anogam_AGAP006702-RA	0.485673	0.614265	0.601591	0.550854	0.378838	0.51019	0.422695	0.397926	0.37901	0.630673	0.702613	0.660794
Anogam_AGAP006703	Anogam_AGAP006703-RA	nan	nan	nan	nan	nan	nan	nan	nan	nan	nan	nan	nan
Anogam_AGAP006705	Anogam_AGAP006705-RA	nan	nan	nan	nan	1	1	nan	1	1	1	1	1
Anogam_AGAP006706	Anogam_AGAP006706-RA	nan	nan	nan	1	1	1	nan	nan	nan	1	1	1
Anogam_AGAP006707	Anogam_AGAP006707-RA	1	nan	nan	nan	1	nan	nan	nan	1	1	1	1
Anogam_AGAP006708	Anogam_AGAP006708-RA	1	nan	nan	nan	nan	nan	nan	nan	nan	1	1	1
Anogam_AGAP006709	Anogam_AGAP006709-RA	1	nan	nan	1	1	1	1	1	1	1	1	1
Anogam_AGAP006710	Anogam_AGAP006710-RA	1	1	nan	nan	1	1	1	1	1	1	1	1
Anogam_AGAP006712	Anogam_AGAP006712-RA	1	1	1	1	1	1	1	1	1	1	1	1
Anogam_AGAP029046	Anogam_AGAP029046-RA	1	1	1	1	1	1	1	1	1	1	1	1
Anogam_AGAP006714	Anogam_AGAP006714-RA	1	1	1	1	1	1	1	1	1	1	1	1
Anogam_AGAP006718	Anogam_AGAP006718-RA	1	1	1	1	1	1	1	1	1	1	1	1
Anogam_AGAP006719	Anogam_AGAP006719-RA	1	1	1	1	1	1	1	1	1	1	1	1
Anogam_AGAP006720	Anogam_AGAP006720-RA	1	nan	1	nan	1	nan	nan	nan	nan	1	1	1
Anogam_AGAP006721	Anogam_AGAP006721-RB	0	0.363094	0	0.536492	0.732241	0	0.55011	0.0683653	1	0.713872	0.370734	0
Anogam_AGAP006721	Anogam_AGAP006721-RA	1	0.636906	1	0.463508	0.267759	1	0.44989	0.931635	0	0.286128	0.629266	1
Anogam_AGAP006723	Anogam_AGAP006723-RA	1	1	1	1	1	1	1	1	1	1	1	1
Anogam_AGAP006724	Anogam_AGAP006724-RA	1	1	1	1	1	1	1	1	nan	1	1	1
Anogam_AGAP006725	Anogam_AGAP006725-RA	1	1	1	1	1	1	1	1	1	1	1	1
Anogam_AGAP006727	Anogam_AGAP006727-RA	1	1	1	1	1	1	1	1	1	1	1	1
Anogam_AGAP006729	Anogam_AGAP006729-RA	1	1	1	1	1	1	1	1	1	1	1	1
Anogam_AGAP006730	Anogam_AGAP006730-RA	1	1	1	1	1	1	1	1	1	1	1	1
Anogam_AGAP006731	Anogam_AGAP006731-RA	nan	1	1	1	1	1	1	1	1	1	1	1
Anogam_AGAP006734	Anogam_AGAP006734-RA	1	1	1	1	1	1	1	1	1	1	1	1
Anogam_AGAP006735	Anogam_AGAP006735-RA	1	1	1	1	1	1	1	1	1	1	1	1
Anogam_AGAP028461	Anogam_AGAP028461-RA	1	1	1	1	1	1	1	1	1	1	1	1
Anogam_AGAP028400	Anogam_AGAP028400-RA	1	1	1	1	1	1	1	1	1	1	1	1
Anogam_AGAP006741	Anogam_AGAP006741-RA	1	1	1	1	1	1	1	1	1	1	1	1
Anogam_AGAP006747	Anogam_AGAP006747-RA	1	1	1	1	1	1	1	1	1	1	1	1
Anogam_AGAP006748	Anogam_AGAP006748-RA	1	1	1	1	1	1	1	1	1	1	1	1
Anogam_AGAP029116	Anogam_AGAP029116-RA	1	1	1	1	1	1	1	1	1	1	1	1
Anogam_AGAP028759	Anogam_AGAP028759-RA	nan	nan	nan	nan	nan	nan	nan	nan	nan	nan	nan	nan
Anogam_AGAP028241	Anogam_AGAP028241-RA	nan	nan	nan	nan	nan	nan	nan	nan	nan	nan	nan	1
Anogam_AGAP006752	Anogam_AGAP006752-RA	nan	nan	nan	nan	nan	nan	nan	nan	nan	nan	nan	nan
Anogam_AGAP028760	Anogam_AGAP028760-RA	1	1	nan	nan	1	nan	nan	nan	nan	nan	nan	1
Anogam_AGAP028354	Anogam_AGAP028354-RA	1	nan	nan	nan	nan	1	nan	nan	nan	nan	nan	1
Anogam_AGAP006756	Anogam_AGAP006756-RA	1	1	1	1	1	1	1	1	1	1	1	1
Anogam_AGAP006759	Anogam_AGAP006759-RA	1	nan	1	1	nan	1	1	1	1	1	1	1
Anogam_AGAP006760	Anogam_AGAP006760-RA	1	1	1	1	1	nan	1	1	1	1	1	1
Anogam_AGAP006761	Anogam_AGAP006761-RA	1	1	1	1	1	1	1	1	1	1	1	1
Anogam_AGAP006763	Anogam_AGAP006763-RA	1	1	1	1	1	1	1	1	1	1	1	1
Anogam_AGAP006765	Anogam_AGAP006765-RA	1	0	nan	0.806005	0.859159	0.960253	1	1	0.506831	0.670428	0.72317	0.416157
Anogam_AGAP006765	Anogam_AGAP006765-RB	0	1	nan	0.193995	0.140841	0.0397473	0	0	0.493169	0.329572	0.27683	0.583843
Anogam_AGAP006768	Anogam_AGAP006768-RA	1	1	1	1	1	1	1	1	1	1	1	1
Anogam_AGAP006770	Anogam_AGAP006770-RA	1	1	1	1	1	1	1	1	1	1	1	1
Anogam_AGAP006774	Anogam_AGAP006774-RA	1	1	1	1	1	1	1	1	1	1	1	1
Anogam_AGAP006776	Anogam_AGAP006776-RA	1	1	1	1	1	1	1	1	1	1	1	1
Anogam_AGAP006778	Anogam_AGAP006778-RA	1	1	1	1	1	1	1	1	1	1	1	1
Anogam_AGAP006779	Anogam_AGAP006779-RA	1	1	1	1	1	1	1	1	1	1	1	1
Anogam_AGAP006781	Anogam_AGAP006781-RA	1	1	1	1	1	1	1	1	1	1	1	1
Anogam_AGAP006782	Anogam_AGAP006782-RA	1	1	1	1	1	1	1	1	1	1	1	1
Anogam_AGAP006784	Anogam_AGAP006784-RA	1	1	1	1	1	1	1	1	1	1	1	1
Anogam_AGAP006789	Anogam_AGAP006789-RA	0.153133	0.283278	0.213429	0.306468	0.487568	0.482669	0.197391	0.199856	0.176035	0.361782	0.248391	0.381466
Anogam_AGAP006789	Anogam_AGAP006789-RB	0.846867	0.716722	0.786571	0.693532	0.512432	0.517331	0.802609	0.800144	0.823965	0.638218	0.751609	0.618534
Anogam_AGAP006791	Anogam_AGAP006791-RA	1	1	1	1	1	1	1	1	nan	1	1	1
Anogam_AGAP006792	Anogam_AGAP006792-RA	1	1	1	1	1	1	1	1	1	1	1	1
Anogam_AGAP006793	Anogam_AGAP006793-RA	1	1	nan	nan	1	1	1	1	1	1	1	1
Anogam_AGAP006795	Anogam_AGAP006795-RA	1	nan	1	1	1	1	1	1	1	1	1	1
Anogam_AGAP006796	Anogam_AGAP006796-RA	1	nan	1	1	1	1	1	1	1	1	1	1
Anogam_AGAP006797	Anogam_AGAP006797-RA	1	1	1	1	1	1	1	1	1	1	1	1
Anogam_AGAP006799	Anogam_AGAP006799-RA	1	1	1	1	1	1	1	1	1	1	1	1
Anogam_AGAP006802	Anogam_AGAP006802-RA	1	1	1	1	1	1	1	1	1	1	1	1
Anogam_AGAP006803	Anogam_AGAP006803-RA	1	1	1	1	1	1	1	1	1	1	1	1
Anogam_AGAP006807	Anogam_AGAP006807-RA	1	1	1	1	1	1	1	1	1	1	1	1
Anogam_AGAP006808	Anogam_AGAP006808-RA	1	1	1	1	1	1	1	1	1	1	1	1
Anogam_AGAP006809	Anogam_AGAP006809-RA	1	1	1	1	1	1	1	1	1	1	1	1
Anogam_AGAP006811	Anogam_AGAP006811-RA	1	1	1	1	1	1	1	1	1	1	1	1
Anogam_AGAP028659	Anogam_AGAP028659-RA	nan	1	1	nan	nan	nan	nan	nan	nan	1	nan	nan
Anogam_AGAP028658	Anogam_AGAP028658-RA	nan	1	1	nan	nan	nan	nan	nan	nan	nan	nan	1
Anogam_AGAP006814	Anogam_AGAP006814-RA	1	1	1	1	1	1	1	1	1	1	1	1
Anogam_AGAP006817	Anogam_AGAP006817-RA	1	1	1	1	1	1	1	1	1	1	1	1
Anogam_AGAP006824	Anogam_AGAP006824-RA	1	1	1	1	1	1	1	1	1	1	1	1
Anogam_AGAP006826	Anogam_AGAP006826-RA	1	1	1	1	1	1	1	1	1	1	1	1
Anogam_AGAP006827	Anogam_AGAP006827-RA	1	1	1	1	1	1	1	1	1	1	1	1
Anogam_AGAP006834	Anogam_AGAP006834-RA	nan	1	nan	nan	nan	nan	nan	nan	nan	nan	1	nan
Anogam_AGAP028401	Anogam_AGAP028401-RA	nan	1	nan	nan	nan	nan	nan	nan	nan	nan	nan	nan
Anogam_AGAP006836	Anogam_AGAP006836-RA	nan	nan	nan	nan	nan	nan	nan	nan	nan	nan	nan	nan
Anogam_AGAP006844	Anogam_AGAP006844-RA	nan	nan	nan	nan	nan	nan	nan	nan	nan	nan	nan	nan
Anogam_AGAP006845	Anogam_AGAP006845-RA	nan	nan	nan	nan	1	nan	nan	nan	nan	nan	nan	1
Anogam_AGAP006847	Anogam_AGAP006847-RA	nan	nan	nan	nan	nan	nan	nan	nan	nan	nan	nan	nan
Anogam_AGAP006853	Anogam_AGAP006853-RA	nan	nan	nan	nan	nan	nan	nan	nan	nan	nan	nan	nan
Anogam_AGAP006854	Anogam_AGAP006854-RA	nan	nan	nan	nan	nan	nan	nan	1	nan	nan	nan	nan
Anogam_AGAP006855	Anogam_AGAP006855-RA	nan	nan	nan	nan	nan	nan	nan	1	nan	nan	nan	nan
Anogam_AGAP006856	Anogam_AGAP006856-RA	nan	nan	nan	nan	nan	nan	nan	nan	nan	nan	nan	nan
Anogam_AGAP006857	Anogam_AGAP006857-RA	nan	nan	nan	nan	nan	nan	nan	nan	nan	nan	nan	nan
Anogam_AGAP006858	Anogam_AGAP006858-RA	nan	nan	nan	nan	nan	nan	nan	nan	nan	nan	nan	nan
Anogam_AGAP006860	Anogam_AGAP006860-RA	nan	nan	nan	nan	nan	nan	nan	nan	nan	nan	nan	nan
Anogam_AGAP006863	Anogam_AGAP006863-RA	nan	nan	nan	nan	nan	nan	nan	nan	nan	nan	nan	nan
Anogam_AGAP006865	Anogam_AGAP006865-RA	nan	nan	nan	nan	nan	nan	nan	nan	nan	nan	nan	nan
Anogam_AGAP006869	Anogam_AGAP006869-RA	nan	nan	nan	nan	nan	nan	nan	nan	nan	1	1	nan
Anogam_AGAP006871	Anogam_AGAP006871-RA	1	1	1	1	1	1	1	1	1	1	1	1
Anogam_AGAP006873	Anogam_AGAP006873-RA	1	1	1	1	1	1	1	1	1	1	1	1
Anogam_AGAP006878	Anogam_AGAP006878-RA	1	1	1	1	1	1	1	1	1	1	1	1
Anogam_AGAP006881	Anogam_AGAP006881-RA	1	1	1	1	1	1	1	1	1	1	1	1
Anogam_AGAP006882	Anogam_AGAP006882-RA	nan	1	1	1	1	1	nan	1	nan	1	1	1
Anogam_AGAP006884	Anogam_AGAP006884-RA	1	1	1	1	1	1	1	1	1	1	1	1
Anogam_AGAP006888	Anogam_AGAP006888-RA	1	1	1	1	1	1	1	1	1	1	1	1
Anogam_AGAP006891	Anogam_AGAP006891-RA	nan	nan	1	1	1	1	nan	nan	nan	1	1	1
Anogam_AGAP029136	Anogam_AGAP029136-RA	1	1	nan	nan	nan	1	nan	nan	1	nan	nan	nan
Anogam_AGAP029142	Anogam_AGAP029142-RA	nan	1	nan	1	nan	nan	1	nan	1	1	nan	nan
Anogam_AGAP029137	Anogam_AGAP029137-RA	1	1	nan	nan	nan	1	nan	nan	1	1	nan	1
Anogam_AGAP029158	Anogam_AGAP029158-RA	nan	nan	nan	1	1	nan	nan	nan	1	1	nan	1
Anogam_AGAP006894	Anogam_AGAP006894-RA	1	1	1	1	1	1	1	1	1	1	1	1
Anogam_AGAP006896	Anogam_AGAP006896-RA	nan	1	1	1	1	1	nan	1	1	1	nan	1
Anogam_AGAP006898	Anogam_AGAP006898-RA	1	1	1	1	1	1	1	1	1	1	1	1
Anogam_AGAP029170	Anogam_AGAP029170-RA	nan	1	nan	1	nan	nan	nan	nan	nan	nan	nan	1
Anogam_AGAP029171	Anogam_AGAP029171-RA	nan	1	1	1	nan	nan	1	nan	nan	nan	nan	1
Anogam_AGAP006900	Anogam_AGAP006900-RA	1	1	1	1	1	1	1	1	1	1	1	1
Anogam_AGAP006901	Anogam_AGAP006901-RC	0.486146	0.518211	0.297247	0.454173	0.210205	0	0.0750915	0.461349	0.245272	0.176956	0.263871	0.118725
Anogam_AGAP006901	Anogam_AGAP006901-RA	0.0650892	0.0511796	0	0	0	0.0423197	0.00975021	0.0268617	0.0153502	0.029187	0.0305485	0.0405012
Anogam_AGAP006901	Anogam_AGAP006901-RB	0.448765	0.430609	0.702753	0.545827	0.789795	0.95768	0.915158	0.511789	0.739378	0.793857	0.705581	0.840773
Anogam_AGAP006908	Anogam_AGAP006908-RA	1	1	1	1	1	1	1	1	nan	1	1	1
Anogam_AGAP006913	Anogam_AGAP006913-RA	nan	1	nan	nan	1	1	nan	1	nan	nan	nan	1
Anogam_AGAP006917	Anogam_AGAP006917-RA	1	1	1	1	1	1	1	1	1	1	1	1
Anogam_AGAP006918	Anogam_AGAP006918-RA	1	1	1	1	1	1	1	1	1	1	1	1
Anogam_AGAP006923	Anogam_AGAP006923-RA	nan	1	1	nan	nan	1	1	1	nan	1	1	1
Anogam_AGAP006924	Anogam_AGAP006924-RA	1	1	1	1	1	1	1	1	1	1	1	1
Anogam_AGAP006925	Anogam_AGAP006925-RA	1	1	1	1	1	1	1	1	1	1	1	1
Anogam_AGAP006926	Anogam_AGAP006926-RA	1	nan	1	1	1	1	1	1	1	1	1	1
Anogam_AGAP006927	Anogam_AGAP006927-RA	1	1	1	1	1	1	1	1	1	1	1	1
Anogam_AGAP006928	Anogam_AGAP006928-RA	1	1	1	1	1	1	1	1	1	1	1	1
Anogam_AGAP006929	Anogam_AGAP006929-RA	1	1	1	1	1	1	1	1	1	1	1	1
Anogam_AGAP006932	Anogam_AGAP006932-RA	1	1	1	1	1	1	1	1	1	1	1	1
Anogam_AGAP006934	Anogam_AGAP006934-RA	1	1	nan	1	1	1	1	nan	1	1	1	1
Anogam_AGAP006935	Anogam_AGAP006935-RB	0	0	0	0	0	0	0.00692705	0	0.0103513	0	0	0
Anogam_AGAP006935	Anogam_AGAP006935-RC	0.082581	0.114224	0.168044	0.154904	0.144244	0.217947	0.23108	0.216798	0.36237	0.205919	0.155378	0.232216
Anogam_AGAP006935	Anogam_AGAP006935-RA	0.917419	0.885776	0.831956	0.845096	0.855756	0.782053	0.761993	0.783202	0.627279	0.794081	0.844622	0.767784
Anogam_AGAP006937	Anogam_AGAP006937-RA	0.0812309	0.0462211	0.026808	0.068314	0.036493	0.0279112	0.0648966	0.0649045	0.0560158	0.266681	0.248513	0.356162
Anogam_AGAP006937	Anogam_AGAP006937-RB	0.485511	0.613548	0.569613	0.585571	0.571198	0.582611	0.540785	0.560049	0.54286	0.524216	0.608494	0.4473
Anogam_AGAP006937	Anogam_AGAP006937-RC	0.433258	0.340231	0.403579	0.346115	0.392309	0.389478	0.394319	0.375047	0.401124	0.209103	0.142993	0.196537
Anogam_AGAP006938	Anogam_AGAP006938-RA	1	1	1	1	1	1	1	1	1	1	1	1
Anogam_AGAP006940	Anogam_AGAP006940-RA	1	1	1	1	1	1	1	1	1	1	1	1
Anogam_AGAP006941	Anogam_AGAP006941-RA	1	1	1	1	1	1	1	1	1	1	1	1
Anogam_AGAP006943	Anogam_AGAP006943-RA	1	1	1	1	1	1	1	1	1	1	1	1
Anogam_AGAP006946	Anogam_AGAP006946-RA	1	1	1	1	1	1	1	1	1	1	1	1
Anogam_AGAP006948	Anogam_AGAP006948-RB	0.274474	0.143212	0.498578	0.194435	0.0285332	0.23029	0.571628	0.42037	0.403988	0.0471755	0.0354249	0.0222349
Anogam_AGAP006948	Anogam_AGAP006948-RA	0.725526	0.856788	0.501422	0.805565	0.971467	0.76971	0.428372	0.57963	0.596012	0.952824	0.964575	0.977765
Anogam_AGAP006949	Anogam_AGAP006949-RA	1	1	1	1	1	1	1	1	1	1	1	1
Anogam_AGAP006953	Anogam_AGAP006953-RA	1	1	1	1	1	1	1	1	1	1	1	1
Anogam_AGAP006954	Anogam_AGAP006954-RA	1	nan	nan	1	0	0	nan	nan	1	0.408017	0	0.678873
Anogam_AGAP006954	Anogam_AGAP006954-RB	0	nan	nan	0	0.721653	1	nan	nan	0	0.358038	0.272119	0
Anogam_AGAP006954	Anogam_AGAP006954-RC	0	nan	nan	0	0.278347	0	nan	nan	0	0.233945	0.727881	0.321127
Anogam_AGAP006955	Anogam_AGAP006955-RA	1	1	nan	1	1	1	1	1	1	1	1	1
Anogam_AGAP006958	Anogam_AGAP006958-RA	1	1	1	1	1	1	1	1	1	1	1	1
Anogam_AGAP006963	Anogam_AGAP006963-RA	1	1	1	1	1	1	1	1	1	1	1	1
Anogam_AGAP006964	Anogam_AGAP006964-RA	1	1	1	1	1	1	1	1	1	1	1	1
Anogam_AGAP006967	Anogam_AGAP006967-RA	1	1	1	1	1	1	1	1	1	1	1	1
Anogam_AGAP006971	Anogam_AGAP006971-RA	1	nan	nan	nan	nan	nan	nan	nan	nan	nan	nan	1
Anogam_AGAP006973	Anogam_AGAP006973-RA	nan	nan	nan	nan	nan	nan	nan	nan	nan	nan	nan	nan
Anogam_AGAP006974	Anogam_AGAP006974-RA	1	nan	nan	nan	1	1	1	1	1	1	1	1
Anogam_AGAP006975	Anogam_AGAP006975-RA	1	nan	1	1	1	1	1	1	1	1	1	1
Anogam_AGAP006977	Anogam_AGAP006977-RA	nan	nan	nan	nan	nan	1	1	nan	nan	1	1	1
Anogam_AGAP006978	Anogam_AGAP006978-RA	nan	1	nan	nan	nan	nan	1	nan	nan	nan	nan	nan
Anogam_AGAP006979	Anogam_AGAP006979-RA	nan	nan	nan	nan	nan	nan	nan	nan	nan	nan	nan	nan
Anogam_AGAP006980	Anogam_AGAP006980-RA	nan	nan	nan	nan	nan	nan	nan	nan	nan	1	1	1
Anogam_AGAP006981	Anogam_AGAP006981-RA	1	nan	nan	nan	nan	nan	nan	nan	nan	nan	nan	nan
Anogam_AGAP006982	Anogam_AGAP006982-RA	nan	nan	nan	nan	nan	nan	nan	nan	nan	nan	nan	nan
Anogam_AGAP006983	Anogam_AGAP006983-RA	nan	nan	nan	nan	nan	nan	nan	nan	nan	nan	nan	nan
Anogam_AGAP006984	Anogam_AGAP006984-RA	nan	1	nan	nan	nan	nan	nan	nan	nan	1	nan	nan
Anogam_AGAP006985	Anogam_AGAP006985-RA	nan	nan	nan	nan	nan	nan	nan	nan	nan	1	nan	nan
Anogam_AGAP006987	Anogam_AGAP006987-RA	1	1	1	1	1	1	1	1	1	1	1	1
Anogam_AGAP006988	Anogam_AGAP006988-RA	1	1	1	1	1	1	1	1	1	1	1	1
Anogam_AGAP006989	Anogam_AGAP006989-RA	1	1	1	1	1	1	1	1	1	1	1	1
Anogam_AGAP006991	Anogam_AGAP006991-RA	1	1	1	1	1	1	1	nan	nan	1	1	1
Anogam_AGAP006992	Anogam_AGAP006992-RA	1	1	1	1	1	1	1	1	1	1	1	1
Anogam_AGAP006994	Anogam_AGAP006994-RB	0.373354	0.139105	0.183075	0.145638	0.284278	0.237018	0.301592	0.305758	0.225731	0.392882	0.431807	0.387294
Anogam_AGAP006994	Anogam_AGAP006994-RA	0.626646	0.860895	0.816925	0.854362	0.715722	0.762982	0.698408	0.694242	0.774269	0.607118	0.568193	0.612706
Anogam_AGAP006995	Anogam_AGAP006995-RA	1	1	1	1	1	1	1	1	1	1	1	1
Anogam_AGAP006997	Anogam_AGAP006997-RA	1	1	1	1	1	1	1	1	1	1	1	1
Anogam_AGAP007000	Anogam_AGAP007000-RA	1	1	1	1	1	1	1	1	1	1	1	1
Anogam_AGAP007002	Anogam_AGAP007002-RA	1	1	1	1	1	1	1	1	1	1	1	1
Anogam_AGAP007003	Anogam_AGAP007003-RA	1	1	1	1	1	1	1	1	1	1	1	1
Anogam_AGAP007006	Anogam_AGAP007006-RB	0.833951	0.792413	0.868765	0.896934	1	0.921515	0.76747	0.792474	0.85131	0.820596	0.75573	0.848479
Anogam_AGAP007006	Anogam_AGAP007006-RA	0.0801103	0.207587	0	0.103064	0	0.0784847	0	0.207526	0.024096	0.112508	0.169688	0.0578399
Anogam_AGAP007006	Anogam_AGAP007006-RC	0.0859391	0	0.131235	1.27099e-06	0	0	0.23253	0	0.124594	0.0668958	0.0745815	0.0936815
Anogam_AGAP007007	Anogam_AGAP007007-RA	1	1	1	1	1	1	1	1	1	1	1	1
Anogam_AGAP007008	Anogam_AGAP007008-RA	1	1	1	1	1	1	1	1	1	1	1	1
Anogam_AGAP007012	Anogam_AGAP007012-RB	0.674049	0.471745	0.660348	0.940551	0.687727	0.651926	0.280461	0.897226	0.650522	0.670057	0.534553	0.682567
Anogam_AGAP007012	Anogam_AGAP007012-RA	0.325951	0.528255	0.339652	0.0594492	0.312273	0.348074	0.719539	0.102774	0.349478	0.329943	0.465447	0.317433
Anogam_AGAP007018	Anogam_AGAP007018-RA	1	1	1	1	1	1	1	1	1	1	1	1
Anogam_AGAP007020	Anogam_AGAP007020-RA	1	1	1	1	1	1	1	1	1	1	1	1
Anogam_AGAP007022	Anogam_AGAP007022-RA	1	1	1	1	1	1	1	1	1	1	1	1
Anogam_AGAP007023	Anogam_AGAP007023-RA	1	1	1	1	1	1	1	1	1	1	1	1
Anogam_AGAP007026	Anogam_AGAP007026-RA	1	1	1	1	1	1	1	1	1	1	1	1
Anogam_AGAP007027	Anogam_AGAP007027-RA	1	1	1	1	1	1	1	1	1	1	1	1
Anogam_AGAP007028	Anogam_AGAP007028-RA	1	1	1	1	1	1	1	1	1	1	1	1
Anogam_AGAP028734	Anogam_AGAP028734-RA	nan	nan	nan	nan	nan	nan	nan	nan	nan	1	1	nan
Anogam_AGAP028733	Anogam_AGAP028733-RA	nan	nan	nan	nan	nan	nan	nan	nan	nan	1	1	1
Anogam_AGAP028735	Anogam_AGAP028735-RA	nan	1	nan	nan	1	nan	nan	1	1	nan	1	1
Anogam_AGAP028463	Anogam_AGAP028463-RA	1	1	1	1	1	1	1	1	1	1	1	1
Anogam_AGAP007031	Anogam_AGAP007031-RA	nan	1	nan	1	1	1	1	nan	1	1	1	1
Anogam_AGAP007033	Anogam_AGAP007033-RA	1	1	1	1	1	1	1	1	1	1	1	1
Anogam_AGAP007034	Anogam_AGAP007034-RA	1	1	1	1	1	nan	nan	1	nan	1	1	nan
Anogam_AGAP007035	Anogam_AGAP007035-RA	1	1	1	1	1	1	1	1	1	1	1	1
Anogam_AGAP007036	Anogam_AGAP007036-RA	nan	1	1	1	1	1	1	1	1	1	1	1
Anogam_AGAP007037	Anogam_AGAP007037-RA	1	1	1	1	1	1	1	1	1	1	1	1
Anogam_AGAP007038	Anogam_AGAP007038-RA	1	1	1	1	1	1	1	1	1	1	1	1
Anogam_AGAP007043	Anogam_AGAP007043-RB	0.688854	0.844643	0.469789	0.691238	0.702718	0.383384	0.708588	0.73467	0.652379	0.732774	0.720819	0.722881
Anogam_AGAP007043	Anogam_AGAP007043-RA	0.311146	0.155357	0.530211	0.308762	0.297282	0.616616	0.291412	0.26533	0.347621	0.267226	0.279181	0.277119
Anogam_AGAP007044	Anogam_AGAP007044-RA	1	1	1	nan	1	1	1	1	1	1	1	1
Anogam_AGAP007046	Anogam_AGAP007046-RA	1	1	1	1	1	1	1	1	1	1	1	1
Anogam_AGAP007049	Anogam_AGAP007049-RA	1	1	1	1	1	1	1	1	1	1	1	1
Anogam_AGAP007050	Anogam_AGAP007050-RA	1	1	1	1	1	1	1	1	1	1	1	1
Anogam_AGAP007051	Anogam_AGAP007051-RA	1	1	1	1	1	1	1	1	1	1	1	1
Anogam_AGAP007052	Anogam_AGAP007052-RA	nan	nan	nan	1	1	1	nan	nan	nan	1	1	1
Anogam_AGAP007054	Anogam_AGAP007054-RA	1	nan	nan	1	1	1	1	1	1	1	1	1
Anogam_AGAP007055	Anogam_AGAP007055-RA	1	1	1	1	1	1	1	1	1	1	1	1
Anogam_AGAP007057	Anogam_AGAP007057-RA	1	1	1	1	1	1	1	1	1	1	1	1
Anogam_AGAP007058	Anogam_AGAP007058-RA	nan	1	1	nan	nan	1	nan	nan	1	1	nan	1
Anogam_AGAP007059	Anogam_AGAP007059-RA	nan	nan	nan	1	1	nan	nan	nan	nan	1	1	1
Anogam_AGAP007060	Anogam_AGAP007060-RA	1	nan	nan	nan	nan	nan	nan	1	nan	1	1	1
Anogam_AGAP007061	Anogam_AGAP007061-RA	nan	nan	nan	nan	nan	nan	nan	nan	nan	nan	nan	nan
Anogam_AGAP007062	Anogam_AGAP007062-RA	1	1	nan	1	1	nan	1	1	1	1	1	1
Anogam_AGAP007063	Anogam_AGAP007063-RA	1	1	1	nan	1	1	1	1	1	1	1	1
Anogam_AGAP007065	Anogam_AGAP007065-RA	1	1	1	1	1	1	1	1	1	1	1	1
Anogam_AGAP007066	Anogam_AGAP007066-RA	1	1	1	1	1	1	1	1	1	1	1	1
Anogam_AGAP007068	Anogam_AGAP007068-RA	1	1	1	1	1	1	1	1	1	1	1	1
Anogam_AGAP007069	Anogam_AGAP007069-RA	1	nan	nan	1	1	1	1	1	1	1	1	1
Anogam_AGAP007070	Anogam_AGAP007070-RA	nan	nan	nan	nan	nan	nan	nan	nan	1	nan	nan	nan
Anogam_AGAP007071	Anogam_AGAP007071-RA	nan	nan	nan	nan	nan	nan	nan	1	nan	nan	nan	nan
Anogam_AGAP007072	Anogam_AGAP007072-RA	nan	nan	1	nan	nan	nan	1	1	1	nan	nan	nan
Anogam_AGAP007073	Anogam_AGAP007073-RA	nan	1	nan	nan	nan	nan	nan	1	nan	nan	nan	nan
Anogam_AGAP007074	Anogam_AGAP007074-RA	nan	nan	nan	nan	nan	nan	nan	nan	1	nan	nan	nan
Anogam_AGAP007075	Anogam_AGAP007075-RA	1	1	1	1	1	1	1	1	1	1	1	1
Anogam_AGAP007078	Anogam_AGAP007078-RA	1	1	1	1	1	1	1	1	1	1	1	1
Anogam_AGAP007079	Anogam_AGAP007079-RA	nan	nan	nan	1	1	1	1	1	1	1	1	1
Anogam_AGAP007080	Anogam_AGAP007080-RA	1	1	1	1	1	1	1	1	1	1	1	1
Anogam_AGAP007083	Anogam_AGAP007083-RA	1	1	1	1	1	1	1	1	1	1	1	1
Anogam_AGAP007084	Anogam_AGAP007084-RA	nan	nan	nan	nan	nan	0	nan	nan	nan	0	0.648824	0
Anogam_AGAP007084	Anogam_AGAP007084-RB	nan	nan	nan	nan	nan	1	nan	nan	nan	1	0.351176	1
Anogam_AGAP007087	Anogam_AGAP007087-RA	1	1	1	1	1	1	1	1	1	1	1	1
Anogam_AGAP007088	Anogam_AGAP007088-RA	1	1	1	1	1	1	1	1	1	1	1	1
Anogam_AGAP007090	Anogam_AGAP007090-RA	nan	nan	nan	nan	nan	nan	nan	nan	nan	1	1	nan
Anogam_AGAP007093	Anogam_AGAP007093-RA	1	1	1	1	1	1	1	1	1	1	1	1
Anogam_AGAP007094	Anogam_AGAP007094-RA	1	1	1	1	1	1	nan	1	1	1	1	1
Anogam_AGAP007096	Anogam_AGAP007096-RA	1	1	1	1	1	1	1	1	1	1	1	1
Anogam_AGAP007099	Anogam_AGAP007099-RA	1	nan	nan	nan	nan	1	nan	nan	nan	nan	nan	nan
Anogam_AGAP007104	Anogam_AGAP007104-RA	1	1	1	1	1	1	1	1	1	1	1	1
Anogam_AGAP007106	Anogam_AGAP007106-RA	1	1	1	1	1	1	1	1	1	1	1	1
Anogam_AGAP007109	Anogam_AGAP007109-RA	nan	1	nan	1	1	1	1	1	1	1	1	1
Anogam_AGAP007112	Anogam_AGAP007112-RA	1	1	1	1	1	1	1	1	1	1	1	1
Anogam_AGAP007114	Anogam_AGAP007114-RA	1	1	1	1	1	1	1	1	1	1	1	1
Anogam_AGAP007118	Anogam_AGAP007118-RA	1	1	1	1	1	1	1	1	1	1	1	1
Anogam_AGAP007119	Anogam_AGAP007119-RA	1	1	1	1	1	1	1	1	1	1	1	1
Anogam_AGAP007122	Anogam_AGAP007122-RA	1	1	1	1	1	1	1	1	1	1	1	1
Anogam_AGAP007126	Anogam_AGAP007126-RA	1	1	1	1	1	1	1	1	1	1	1	1
Anogam_AGAP007127	Anogam_AGAP007127-RA	1	1	1	1	1	1	1	1	nan	1	1	1
Anogam_AGAP007129	Anogam_AGAP007129-RA	1	1	1	1	1	1	1	1	1	1	1	1
Anogam_AGAP007130	Anogam_AGAP007130-RA	1	1	1	1	1	1	1	1	1	1	1	1
Anogam_AGAP007135	Anogam_AGAP007135-RA	1	1	nan	1	nan	nan	1	1	1	1	1	1
Anogam_AGAP007143	Anogam_AGAP007143-RA	1	1	1	1	1	1	1	1	1	1	1	1
Anogam_AGAP007146	Anogam_AGAP007146-RA	1	1	1	1	1	1	1	1	1	1	1	1
Anogam_AGAP007148	Anogam_AGAP007148-RA	1	nan	nan	1	nan	nan	nan	nan	1	1	1	1
Anogam_AGAP007150	Anogam_AGAP007150-RA	nan	nan	nan	nan	nan	nan	nan	nan	nan	nan	nan	nan
Anogam_AGAP007151	Anogam_AGAP007151-RA	nan	nan	nan	nan	nan	nan	nan	nan	1	nan	1	1
Anogam_AGAP007152	Anogam_AGAP007152-RA	1	nan	nan	nan	1	nan	nan	nan	nan	1	nan	1
Anogam_AGAP007153	Anogam_AGAP007153-RA	nan	nan	nan	nan	nan	nan	nan	nan	nan	nan	1	nan
Anogam_AGAP007154	Anogam_AGAP007154-RA	1	nan	nan	1	1	nan	nan	nan	nan	1	1	1
Anogam_AGAP007156	Anogam_AGAP007156-RA	1	1	1	1	1	1	1	1	1	1	1	1
Anogam_AGAP007157	Anogam_AGAP007157-RA	1	1	1	1	1	1	1	1	1	1	1	1
Anogam_AGAP007159	Anogam_AGAP007159-RA	1	1	1	1	1	1	1	1	1	1	1	1
Anogam_AGAP007160	Anogam_AGAP007160-RA	0	0	0	0	0.569909	0	0	0	0	0	0	0
Anogam_AGAP007160	Anogam_AGAP007160-RB	0.677414	0	0	0.8995	0.329984	0.363291	0.776894	0.660567	0.699352	0.631882	0.647218	0.567896
Anogam_AGAP007160	Anogam_AGAP007160-RC	0.272281	1	1	0	0.00684369	0.402291	0.218366	0.314538	0.300648	0.357104	0.324951	0.320758
Anogam_AGAP007160	Anogam_AGAP007160-RD	0.0503042	0	0	0.1005	0.0932632	0.234418	0.00474067	0.0248952	0	0.0110145	0.027831	0.111346
Anogam_AGAP007162	Anogam_AGAP007162-RA	0	0.255784	0.0609955	0	0.278383	0	0.0784391	0.0437723	0.0578274	0.0752198	0.0858726	0.0960315
Anogam_AGAP007162	Anogam_AGAP007162-RB	1	0.744216	0.939004	1	0.721617	1	0.921561	0.956228	0.942173	0.92478	0.914127	0.903969
Anogam_AGAP007163	Anogam_AGAP007163-RB	0.0785168	0.093268	0	0.214906	0.296831	0	0	0	0	0.755751	0.822632	0.948051
Anogam_AGAP007163	Anogam_AGAP007163-RA	0.921483	0.906732	1	0.785094	0.703169	1	1	1	1	0.244249	0.177368	0.0519491
Anogam_AGAP007165	Anogam_AGAP007165-RA	1	nan	nan	1	1	1	1	1	1	1	1	1
Anogam_AGAP007166	Anogam_AGAP007166-RA	1	1	1	1	1	1	1	1	1	1	1	1
Anogam_AGAP007167	Anogam_AGAP007167-RA	1	1	1	1	1	1	1	1	1	1	1	1
Anogam_AGAP007168	Anogam_AGAP007168-RA	1	1	1	1	1	1	1	1	1	1	1	1
Anogam_AGAP007173	Anogam_AGAP007173-RA	1	1	1	1	1	1	1	1	1	1	1	1
Anogam_AGAP007176	Anogam_AGAP007176-RA	1	1	1	1	1	1	1	1	1	1	1	1
Anogam_AGAP007181	Anogam_AGAP007181-RA	0.424652	0.85918	0.677621	0.765493	0.816537	0.54102	0.603589	0.554133	0.529005	0.544963	0.453825	0.475099
Anogam_AGAP007181	Anogam_AGAP007181-RB	0.575348	0.14082	0.322379	0.234507	0.183463	0.45898	0.396411	0.445867	0.470995	0.455037	0.546175	0.524901
Anogam_AGAP007184	Anogam_AGAP007184-RA	1	1	nan	1	1	1	1	1	1	1	1	1
Anogam_AGAP007185	Anogam_AGAP007185-RA	1	1	1	1	1	1	1	1	1	1	1	1
Anogam_AGAP007186	Anogam_AGAP007186-RA	1	1	1	1	1	1	1	1	1	1	1	1
Anogam_AGAP007187	Anogam_AGAP007187-RA	nan	nan	nan	nan	nan	nan	nan	nan	nan	nan	nan	nan
Anogam_AGAP007188	Anogam_AGAP007188-RA	nan	nan	nan	nan	nan	nan	nan	1	nan	nan	nan	nan
Anogam_AGAP007189	Anogam_AGAP007189-RA	nan	nan	nan	nan	nan	nan	nan	nan	nan	nan	nan	nan
Anogam_AGAP007190	Anogam_AGAP007190-RA	nan	nan	nan	nan	nan	nan	nan	1	nan	nan	nan	nan
Anogam_AGAP007195	Anogam_AGAP007195-RA	1	nan	nan	nan	nan	1	nan	nan	1	nan	1	nan
Anogam_AGAP007196	Anogam_AGAP007196-RA	nan	nan	nan	1	1	nan	1	nan	1	1	1	1
Anogam_AGAP007197	Anogam_AGAP007197-RA	nan	nan	nan	nan	nan	nan	1	nan	1	1	nan	1
Anogam_AGAP007198	Anogam_AGAP007198-RB	0.610157	0.636905	0.826916	0.644404	0.542901	0.764828	0.473075	0.560386	0.665433	0.498724	0.633332	0.710045
Anogam_AGAP007198	Anogam_AGAP007198-RA	0.389843	0.363095	0.173084	0.355596	0.457099	0.235172	0.526925	0.439614	0.334567	0.501276	0.366668	0.289955
Anogam_AGAP007199	Anogam_AGAP007199-RA	nan	nan	nan	nan	nan	nan	nan	1	nan	nan	nan	nan
Anogam_AGAP007200	Anogam_AGAP007200-RA	nan	nan	nan	nan	1	nan	nan	nan	nan	nan	nan	nan
Anogam_AGAP007202	Anogam_AGAP007202-RA	1	1	1	1	1	1	1	1	1	1	1	1
Anogam_AGAP007206	Anogam_AGAP007206-RA	1	1	1	1	1	1	1	1	1	1	1	1
Anogam_AGAP007208	Anogam_AGAP007208-RA	1	1	1	1	1	1	1	1	1	1	1	1
Anogam_AGAP007209	Anogam_AGAP007209-RB	0.00268684	0.000647553	0.00238721	0.000346986	0.00134218	0.000656885	0.00542963	0	0.00230296	0.00130456	0.00696807	0.0003989
Anogam_AGAP007209	Anogam_AGAP007209-RD	0.909562	0.934181	0.904621	0.778709	0.857851	0.783066	0.941963	0.917657	0.798291	0.775951	0.737686	0.650398
Anogam_AGAP007209	Anogam_AGAP007209-RA	0.0852576	0.0651718	0.0876812	0.171251	0.0703737	0.135875	0.0526071	0.0751776	0.0934942	0.0682753	0.069646	0.10652
Anogam_AGAP007209	Anogam_AGAP007209-RC	0	0	0	0.000149548	0	0	0	0	0	0.00186381	0	0.000428395
Anogam_AGAP007209	Anogam_AGAP007209-RE	0.00249359	0	0.00531102	0.0495436	0.0704326	0.0804023	0	0.00716535	0.105911	0.152605	0.1857	0.242254
Anogam_AGAP007210	Anogam_AGAP007210-RA	1	1	1	1	1	1	1	1	1	1	1	1
Anogam_AGAP007212	Anogam_AGAP007212-RA	1	1	1	1	1	1	1	1	1	1	1	1
Anogam_AGAP007214	Anogam_AGAP007214-RA	1	1	1	1	1	1	1	nan	1	1	1	1
Anogam_AGAP007215	Anogam_AGAP007215-RA	1	1	1	1	1	1	1	1	1	1	1	1
Anogam_AGAP007216	Anogam_AGAP007216-RA	1	1	1	nan	1	1	1	1	1	1	1	1
Anogam_AGAP007219	Anogam_AGAP007219-RA	1	1	1	1	1	1	1	1	1	1	1	1
Anogam_AGAP029058	Anogam_AGAP029058-RA	1	1	1	1	1	1	1	1	1	1	1	1
Anogam_AGAP007224	Anogam_AGAP007224-RA	nan	nan	nan	nan	nan	nan	nan	nan	nan	nan	nan	nan
Anogam_AGAP007225	Anogam_AGAP007225-RA	nan	nan	nan	nan	nan	nan	nan	nan	nan	1	nan	nan
Anogam_AGAP007226	Anogam_AGAP007226-RA	nan	nan	nan	nan	nan	nan	nan	nan	nan	nan	nan	nan
Anogam_AGAP007227	Anogam_AGAP007227-RA	nan	nan	nan	nan	nan	nan	nan	nan	nan	nan	nan	nan
Anogam_AGAP007228	Anogam_AGAP007228-RA	nan	nan	nan	nan	nan	nan	nan	nan	nan	nan	nan	nan
Anogam_AGAP007229	Anogam_AGAP007229-RA	nan	nan	nan	nan	nan	nan	nan	nan	nan	nan	nan	1
Anogam_AGAP007230	Anogam_AGAP007230-RA	nan	nan	nan	nan	nan	nan	nan	nan	nan	nan	nan	1
Anogam_AGAP007231	Anogam_AGAP007231-RA	nan	nan	nan	nan	nan	nan	nan	nan	nan	nan	nan	nan
Anogam_AGAP007232	Anogam_AGAP007232-RA	nan	nan	nan	nan	nan	nan	nan	nan	nan	nan	nan	nan
Anogam_AGAP007234	Anogam_AGAP007234-RA	nan	nan	nan	nan	nan	nan	nan	nan	nan	nan	nan	nan
Anogam_AGAP007235	Anogam_AGAP007235-RA	nan	nan	nan	nan	nan	nan	nan	nan	nan	nan	nan	nan
Anogam_AGAP007236	Anogam_AGAP007236-RA	nan	nan	nan	nan	nan	nan	nan	nan	nan	nan	nan	nan
Anogam_AGAP007238	Anogam_AGAP007238-RA	1	1	1	1	1	1	1	1	1	1	1	1
Anogam_AGAP007240	Anogam_AGAP007240-RA	1	1	1	1	1	1	1	1	nan	1	1	1
Anogam_AGAP007242	Anogam_AGAP007242-RA	0.785558	0.663808	0.804526	0.735389	0.762959	0.616005	0.591784	0.66446	0.591773	0.810426	0.869196	0.902707
Anogam_AGAP007242	Anogam_AGAP007242-RB	0.214442	0.336192	0.195474	0.264611	0.237041	0.383995	0.408216	0.33554	0.408227	0.189574	0.130804	0.0972928
Anogam_AGAP007243	Anogam_AGAP007243-RA	1	1	1	1	1	1	1	1	1	1	1	1
Anogam_AGAP007244	Anogam_AGAP007244-RA	1	1	1	1	1	1	1	1	1	1	1	1
Anogam_AGAP007246	Anogam_AGAP007246-RA	1	1	1	1	1	1	1	1	1	1	1	1
Anogam_AGAP007249	Anogam_AGAP007249-RB	0	0.785951	0.863123	0	1	0	0.690915	1	1	0.929922	0.868489	0.708017
Anogam_AGAP007249	Anogam_AGAP007249-RA	1	0.214049	0.136877	1	0	1	0.309085	0	0	0.070078	0.131511	0.291983
Anogam_AGAP007250	Anogam_AGAP007250-RB	0.567989	0.566595	0	0.421904	0	0	0.350872	0	0	0	0	0
Anogam_AGAP007250	Anogam_AGAP007250-RA	0.432011	0.433405	1	0.234871	1	0.493939	0.649128	0	1	0.798439	1	0.947288
Anogam_AGAP007250	Anogam_AGAP007250-RC	0	0	0	0.343225	0	0.506061	0	1	0	0.201561	0	0.0527116
Anogam_AGAP007251	Anogam_AGAP007251-RA	1	1	1	1	1	1	1	nan	1	1	1	1
Anogam_AGAP007253	Anogam_AGAP007253-RB	0.841567	0.827687	0.924896	0.926031	0.827555	0.88408	0.942867	0.924221	0.9453	0.830725	0.754772	0.738809
Anogam_AGAP007253	Anogam_AGAP007253-RA	0.158433	0.172313	0.0751039	0.0739685	0.172445	0.11592	0.0571334	0.0757793	0.0546996	0.169275	0.245228	0.261191
Anogam_AGAP007254	Anogam_AGAP007254-RA	1	1	1	1	1	1	1	1	1	1	1	1
Anogam_AGAP007257	Anogam_AGAP007257-RA	1	1	1	1	1	1	1	1	1	1	1	1
Anogam_AGAP007258	Anogam_AGAP007258-RA	1	1	1	1	1	1	1	1	1	1	1	1
Anogam_AGAP007262	Anogam_AGAP007262-RA	1	1	1	1	1	1	nan	nan	1	1	1	1
Anogam_AGAP007264	Anogam_AGAP007264-RA	1	1	1	1	1	1	1	1	1	1	1	1
Anogam_AGAP007266	Anogam_AGAP007266-RA	nan	1	nan	1	1	1	1	1	1	1	1	1
Anogam_AGAP007270	Anogam_AGAP007270-RA	nan	nan	nan	nan	nan	nan	nan	nan	nan	nan	nan	nan
Anogam_AGAP007272	Anogam_AGAP007272-RA	nan	nan	nan	nan	nan	nan	nan	nan	nan	nan	nan	nan
Anogam_AGAP007273	Anogam_AGAP007273-RA	nan	nan	nan	nan	nan	nan	nan	nan	nan	nan	nan	nan
Anogam_AGAP007281	Anogam_AGAP007281-RA	nan	nan	nan	1	1	nan	nan	nan	1	nan	nan	1
Anogam_AGAP007282	Anogam_AGAP007282-RA	1	nan	nan	1	nan	nan	nan	nan	1	1	1	1
Anogam_AGAP007283	Anogam_AGAP007283-RA	1	nan	nan	1	nan	1	nan	1	1	nan	nan	1
Anogam_AGAP007284	Anogam_AGAP007284-RA	1	1	1	1	1	1	1	1	1	1	1	1
Anogam_AGAP007286	Anogam_AGAP007286-RA	nan	nan	nan	1	1	1	nan	1	1	1	1	1
Anogam_AGAP007289	Anogam_AGAP007289-RB	nan	nan	nan	nan	1	1	1	nan	nan	1	1	1
Anogam_AGAP007290	Anogam_AGAP007290-RA	nan	nan	nan	nan	1	nan	1	nan	nan	1	1	1
Anogam_AGAP007291	Anogam_AGAP007291-RA	1	1	1	1	1	1	1	1	1	1	1	1
Anogam_AGAP007292	Anogam_AGAP007292-RA	1	1	1	1	1	1	1	1	1	1	1	1
Anogam_AGAP007293	Anogam_AGAP007293-RA	1	1	1	1	1	1	1	1	1	1	1	1
Anogam_AGAP007294	Anogam_AGAP007294-RA	1	1	1	1	1	1	1	1	1	1	1	1
Anogam_AGAP007295	Anogam_AGAP007295-RA	1	1	1	1	1	1	1	1	1	1	1	1
Anogam_AGAP007297	Anogam_AGAP007297-RA	1	1	1	1	1	1	1	1	1	1	1	1
Anogam_AGAP007299	Anogam_AGAP007299-RA	1	1	1	1	1	1	1	1	1	1	1	1
Anogam_AGAP007300	Anogam_AGAP007300-RA	1	1	1	1	nan	1	1	1	1	1	1	1
Anogam_AGAP007302	Anogam_AGAP007302-RA	1	1	1	1	1	1	1	1	1	1	1	1
Anogam_AGAP007303	Anogam_AGAP007303-RA	1	1	1	1	1	1	1	1	1	1	1	1
Anogam_AGAP007304	Anogam_AGAP007304-RA	nan	1	nan	1	nan	nan	1	1	1	1	1	1
Anogam_AGAP007305	Anogam_AGAP007305-RA	1	1	nan	1	nan	1	nan	1	1	1	1	1
Anogam_AGAP007306	Anogam_AGAP007306-RA	1	1	1	1	1	1	1	1	1	1	1	1
Anogam_AGAP007308	Anogam_AGAP007308-RA	1	1	1	1	1	1	1	1	1	1	1	1
Anogam_AGAP007313	Anogam_AGAP007313-RA	1	1	1	1	1	1	1	1	1	1	1	1
Anogam_AGAP007317	Anogam_AGAP007317-RA	1	1	1	1	1	1	1	1	1	1	1	1
Anogam_AGAP007318	Anogam_AGAP007318-RA	1	1	1	1	1	1	1	1	1	1	1	1
Anogam_AGAP007319	Anogam_AGAP007319-RA	1	1	1	1	1	1	1	1	1	1	1	1
Anogam_AGAP007320	Anogam_AGAP007320-RA	1	1	1	1	1	1	1	1	1	1	1	1
Anogam_AGAP007321	Anogam_AGAP007321-RA	1	1	1	nan	1	1	1	1	nan	1	1	1
Anogam_AGAP007322	Anogam_AGAP007322-RA	1	nan	1	1	1	1	1	1	1	1	1	1
Anogam_AGAP007323	Anogam_AGAP007323-RA	1	nan	nan	nan	1	1	1	nan	1	1	1	1
Anogam_AGAP007325	Anogam_AGAP007325-RA	0.412637	0.478567	0.47003	0.387245	0.494597	0.389886	0.371778	0.36138	0.464169	0.524843	0.504385	0.627107
Anogam_AGAP007325	Anogam_AGAP007325-RB	0.587363	0.521433	0.52997	0.612755	0.505403	0.610114	0.628222	0.63862	0.535831	0.475157	0.495615	0.372893
Anogam_AGAP007326	Anogam_AGAP007326-RA	0	0	0	0	0	1	0.286632	0	0	0.131251	0.139129	0.0481694
Anogam_AGAP007326	Anogam_AGAP007326-RB	1	1	1	1	1	0	0.713368	1	1	0.868749	0.860871	0.951831
Anogam_AGAP007335	Anogam_AGAP007335-RA	1	1	1	1	1	1	1	1	1	1	1	1
Anogam_AGAP007337	Anogam_AGAP007337-RA	1	1	nan	1	1	1	nan	nan	nan	1	1	1
Anogam_AGAP007339	Anogam_AGAP007339-RA	1	1	1	1	1	1	1	1	1	1	1	1
Anogam_AGAP028466	Anogam_AGAP028466-RA	1	1	1	1	1	1	1	1	1	1	1	1
Anogam_AGAP007342	Anogam_AGAP007342-RA	1	1	1	1	1	1	1	1	1	1	1	1
Anogam_AGAP007343	Anogam_AGAP007343-RA	1	1	1	1	1	1	1	1	1	1	1	1
Anogam_AGAP007344	Anogam_AGAP007344-RA	nan	1	nan	1	nan	1	1	1	nan	1	nan	1
Anogam_AGAP007345	Anogam_AGAP007345-RA	1	1	1	1	1	1	1	1	1	1	1	1
Anogam_AGAP007346	Anogam_AGAP007346-RA	1	1	1	1	1	1	1	1	1	1	1	1
Anogam_AGAP007347	Anogam_AGAP007347-RA	1	1	1	1	1	1	1	1	1	1	1	1
Anogam_AGAP007349	Anogam_AGAP007349-RA	1	1	1	1	1	1	1	1	1	1	1	1
Anogam_AGAP007353	Anogam_AGAP007353-RA	1	1	1	nan	nan	nan	nan	1	nan	1	1	1
Anogam_AGAP007359	Anogam_AGAP007359-RA	1	1	nan	1	1	nan	nan	nan	1	1	nan	1
Anogam_AGAP007362	Anogam_AGAP007362-RA	0.270485	0.203104	0.274758	0.288687	0.290274	0.236555	0.210137	0.181714	0.271678	0.195543	0.139971	0.159472
Anogam_AGAP007362	Anogam_AGAP007362-RB	0.729515	0.796896	0.725242	0.711313	0.709726	0.763445	0.789863	0.818286	0.728322	0.804457	0.860029	0.840528
Anogam_AGAP007366	Anogam_AGAP007366-RB	0.424981	0.321389	0.332252	0.426258	0.459895	0.425369	0.314353	0.341756	0.373719	0.304236	0.275323	0.306705
Anogam_AGAP007366	Anogam_AGAP007366-RA	0.575019	0.678611	0.667748	0.573742	0.540105	0.574631	0.685647	0.658244	0.626281	0.695764	0.724677	0.693295
Anogam_AGAP007368	Anogam_AGAP007368-RA	nan	nan	nan	1	1	1	nan	1	1	1	1	1
Anogam_AGAP007369	Anogam_AGAP007369-RA	1	1	1	1	1	1	1	nan	nan	1	1	1
Anogam_AGAP007373	Anogam_AGAP007373-RB	0.204419	0.172894	0.114603	0.161511	0.0627484	0.037009	1.38131e-07	0.192288	0.176366	0.0925415	0.166615	0.183347
Anogam_AGAP007373	Anogam_AGAP007373-RA	0.795581	0.827106	0.885397	0.838489	0.937252	0.962991	1	0.807712	0.823634	0.907458	0.833385	0.816653
Anogam_AGAP007374	Anogam_AGAP007374-RA	1	1	1	1	1	1	1	1	1	1	1	1
Anogam_AGAP007375	Anogam_AGAP007375-RA	1	1	1	1	1	1	1	1	1	1	1	1
Anogam_AGAP007377	Anogam_AGAP007377-RA	1	1	1	1	1	1	1	1	1	1	1	1
Anogam_AGAP007379	Anogam_AGAP007379-RA	1	1	1	1	1	1	1	1	1	1	1	1
Anogam_AGAP007380	Anogam_AGAP007380-RA	1	1	1	1	1	1	1	1	1	1	1	1
Anogam_AGAP007381	Anogam_AGAP007381-RA	1	1	1	1	1	1	1	1	1	1	1	1
Anogam_AGAP007384	Anogam_AGAP007384-RA	1	1	1	1	1	1	1	1	1	1	1	1
Anogam_AGAP007387	Anogam_AGAP007387-RA	1	1	1	1	1	1	1	1	1	1	1	1
Anogam_AGAP007388	Anogam_AGAP007388-RA	1	1	1	1	1	1	1	1	1	1	1	1
Anogam_AGAP007390	Anogam_AGAP007390-RA	1	1	1	1	1	1	1	1	1	1	1	1
Anogam_AGAP007392	Anogam_AGAP007392-RA	1	1	1	1	1	1	1	1	1	1	1	1
Anogam_AGAP007394	Anogam_AGAP007394-RA	1	1	1	1	1	1	1	1	1	1	1	1
Anogam_AGAP007397	Anogam_AGAP007397-RA	1	1	1	1	1	1	1	1	1	1	1	1
Anogam_AGAP007398	Anogam_AGAP007398-RA	1	1	1	1	1	1	1	1	1	1	1	1
Anogam_AGAP007400	Anogam_AGAP007400-RA	1	1	1	1	1	1	1	1	1	1	1	1
Anogam_AGAP007401	Anogam_AGAP007401-RA	0.722904	0.110901	0.707141	0.194473	0.286083	0.441061	0.786046	0.916954	0.926528	0.34144	0.265278	0.230327
Anogam_AGAP007401	Anogam_AGAP007401-RB	0.277096	0.889099	0.292859	0.805527	0.713917	0.558939	0.213954	0.0830459	0.0734725	0.65856	0.734722	0.769673
Anogam_AGAP007402	Anogam_AGAP007402-RA	1	1	1	1	1	1	1	1	1	1	1	1
Anogam_AGAP007405	Anogam_AGAP007405-RA	nan	nan	nan	nan	nan	nan	nan	nan	nan	nan	nan	nan
Anogam_AGAP007413	Anogam_AGAP007413-RA	1	1	1	1	1	1	1	1	1	1	1	1
Anogam_AGAP007414	Anogam_AGAP007414-RA	nan	nan	nan	nan	1	1	nan	nan	nan	1	1	1
Anogam_AGAP007418	Anogam_AGAP007418-RA	1	1	1	1	1	1	1	1	1	1	1	1
Anogam_AGAP007422	Anogam_AGAP007422-RA	1	1	1	1	1	1	1	1	1	1	1	1
Anogam_AGAP007422	Anogam_AGAP007422-RB	0	0	0	0	0	0	0	0	0	0	0	0
Anogam_AGAP007440	Anogam_AGAP007440-RA	1	1	1	1	1	1	1	1	1	1	1	1
Anogam_AGAP007443	Anogam_AGAP007443-RA	nan	1	nan	nan	nan	1	nan	1	nan	1	nan	1
Anogam_AGAP007450	Anogam_AGAP007450-RA	1	1	1	1	1	1	nan	1	1	1	1	1
Anogam_AGAP007452	Anogam_AGAP007452-RB	0.899148	0.950922	0.932197	0.959207	0.77086	0.973734	0.891743	0.684	0.643397	0.696322	0.705733	0.638372
Anogam_AGAP007452	Anogam_AGAP007452-RA	0.100852	0.0490782	0.0678028	0.0407932	0.22914	0.0262662	0.108257	0.316	0.356603	0.303678	0.294267	0.361628
Anogam_AGAP007454	Anogam_AGAP007454-RA	1	1	1	1	1	1	1	1	1	1	1	1
Anogam_AGAP007457	Anogam_AGAP007457-RA	1	1	1	1	1	1	1	1	1	1	1	1
Anogam_AGAP007461	Anogam_AGAP007461-RA	1	1	nan	1	1	1	nan	nan	1	1	1	1
Anogam_AGAP007473	Anogam_AGAP007473-RA	1	1	1	1	1	1	1	1	1	1	1	1
Anogam_AGAP007474	Anogam_AGAP007474-RA	1	1	1	1	1	1	1	1	1	1	1	1
Anogam_AGAP028762	Anogam_AGAP028762-RA	1	1	1	1	1	1	nan	nan	nan	nan	1	nan
Anogam_AGAP007476	Anogam_AGAP007476-RA	1	1	1	1	1	1	1	1	1	1	1	1
Anogam_AGAP007477	Anogam_AGAP007477-RA	1	1	1	1	1	1	1	1	1	1	1	1
Anogam_AGAP007479	Anogam_AGAP007479-RA	1	1	1	1	1	1	1	1	1	1	1	1
Anogam_AGAP007483	Anogam_AGAP007483-RA	1	nan	1	1	1	1	nan	nan	1	1	nan	1
Anogam_AGAP007487	Anogam_AGAP007487-RA	1	nan	nan	1	1	1	nan	nan	nan	1	1	1
Anogam_AGAP007489	Anogam_AGAP007489-RA	0.741899	0.518233	0.533158	0.462574	0.510387	0.471674	0.299166	0.34451	0.659415	0.465217	0.53533	0.586728
Anogam_AGAP007489	Anogam_AGAP007489-RB	0.258101	0.481767	0.466842	0.537426	0.489613	0.528326	0.700834	0.65549	0.340585	0.534783	0.46467	0.413272
Anogam_AGAP007490	Anogam_AGAP007490-RA	nan	nan	nan	1	1	1	nan	1	1	1	1	1
Anogam_AGAP007492	Anogam_AGAP007492-RA	1	1	1	1	1	1	1	1	1	1	1	1
Anogam_AGAP007497	Anogam_AGAP007497-RA	1	1	1	1	1	1	1	1	1	1	1	1
Anogam_AGAP007499	Anogam_AGAP007499-RA	1	1	1	1	1	1	1	1	1	1	1	1
Anogam_AGAP007502	Anogam_AGAP007502-RA	1	1	1	1	1	1	1	1	1	1	1	1
Anogam_AGAP007504	Anogam_AGAP007504-RA	1	1	1	1	1	1	1	1	1	1	1	1
Anogam_AGAP007506	Anogam_AGAP007506-RA	1	1	1	1	1	1	1	1	1	1	1	1
Anogam_AGAP007508	Anogam_AGAP007508-RA	1	1	1	nan	1	1	1	1	1	1	1	1
Anogam_AGAP007510	Anogam_AGAP007510-RA	1	1	1	1	1	1	1	1	1	1	1	1
Anogam_AGAP007513	Anogam_AGAP007513-RA	1	1	1	1	1	1	1	1	1	1	1	1
Anogam_AGAP007514	Anogam_AGAP007514-RA	1	1	1	1	1	1	1	1	1	1	1	1
Anogam_AGAP007515	Anogam_AGAP007515-RA	1	1	1	1	1	1	1	1	1	1	1	1
Anogam_AGAP007516	Anogam_AGAP007516-RA	1	1	1	1	1	1	1	1	1	1	1	1
Anogam_AGAP007517	Anogam_AGAP007517-RA	1	1	1	1	1	1	1	1	1	1	1	1
Anogam_AGAP007518	Anogam_AGAP007518-RA	1	1	1	1	1	1	1	1	1	1	1	1
Anogam_AGAP007519	Anogam_AGAP007519-RA	1	1	1	1	1	1	1	1	1	1	1	1
Anogam_AGAP007521	Anogam_AGAP007521-RA	1	1	1	1	1	1	1	1	1	1	1	1
Anogam_AGAP007521	Anogam_AGAP007521-RB	0	0	0	0	0	0	0	0	0	0	0	0
Anogam_AGAP007524	Anogam_AGAP007524-RA	1	1	1	1	1	1	1	1	1	1	1	1
Anogam_AGAP007529	Anogam_AGAP007529-RA	1	1	1	1	1	1	1	1	1	1	1	1
Anogam_AGAP007530	Anogam_AGAP007530-RA	1	1	1	1	1	1	1	1	1	1	1	1
Anogam_AGAP007532	Anogam_AGAP007532-RA	1	1	1	1	1	1	1	1	1	1	1	1
Anogam_AGAP013228	Anogam_AGAP013228-RA	1	1	1	1	1	1	1	1	1	1	1	1
Anogam_AGAP007534	Anogam_AGAP007534-RC	0.308876	0.226529	0.286255	0.29409	0.245863	0.321326	0.459707	0.345404	0.380939	0.633367	0.529463	0.589376
Anogam_AGAP007534	Anogam_AGAP007534-RA	0.272261	0.143074	0.191312	0.36487	0.203783	0.22808	0.34739	0.311923	0.270451	0.13451	0.243397	0.265278
Anogam_AGAP007534	Anogam_AGAP007534-RB	0.418863	0.630397	0.522433	0.34104	0.550354	0.450594	0.192903	0.342672	0.34861	0.232124	0.227141	0.145346
Anogam_AGAP007540	Anogam_AGAP007540-RA	1	1	1	1	1	1	1	1	1	1	1	1
Anogam_AGAP007541	Anogam_AGAP007541-RA	1	1	1	1	1	1	1	1	1	1	1	1
Anogam_AGAP007542	Anogam_AGAP007542-RA	1	1	1	1	1	1	1	1	1	1	1	1
Anogam_AGAP007547	Anogam_AGAP007547-RA	1	1	1	1	1	1	1	1	1	1	1	1
Anogam_AGAP007548	Anogam_AGAP007548-RA	0.286137	0.625729	0.165946	0.507773	0.352867	0.231328	0.627598	0.636232	0.628111	0.495628	0.564448	0.565265
Anogam_AGAP007548	Anogam_AGAP007548-RB	0.713863	0.374271	0.834054	0.492227	0.647133	0.768672	0.372402	0.363768	0.371889	0.504372	0.435552	0.434735
Anogam_AGAP007551	Anogam_AGAP007551-RA	1	1	1	1	1	1	1	1	1	1	1	1
Anogam_AGAP007556	Anogam_AGAP007556-RA	1	1	1	1	nan	1	1	1	1	1	1	1
Anogam_AGAP007557	Anogam_AGAP007557-RA	nan	nan	1	nan	1	nan	nan	nan	1	1	1	1
Anogam_AGAP007559	Anogam_AGAP007559-RA	nan	1	nan	nan	1	1	nan	nan	nan	1	nan	1
Anogam_AGAP007566	Anogam_AGAP007566-RA	nan	nan	nan	nan	nan	nan	nan	nan	nan	nan	nan	nan
Anogam_AGAP007568	Anogam_AGAP007568-RA	1	1	1	1	1	1	1	1	1	1	1	1
Anogam_AGAP007570	Anogam_AGAP007570-RA	1	1	1	1	1	1	1	1	1	1	1	1
Anogam_AGAP007573	Anogam_AGAP007573-RA	1	1	1	1	1	1	1	1	1	1	1	1
Anogam_AGAP007575	Anogam_AGAP007575-RA	1	1	1	1	1	1	1	1	1	1	1	1
Anogam_AGAP007577	Anogam_AGAP007577-RA	1	1	1	1	1	1	1	1	1	1	1	1
Anogam_AGAP007578	Anogam_AGAP007578-RA	1	1	1	1	1	1	1	1	1	1	1	1
Anogam_AGAP007580	Anogam_AGAP007580-RA	0.313992	0.339954	0.276724	0.210691	0.308367	0.208421	0.373773	0.402421	0.365278	0.188761	0.159901	0.227641
Anogam_AGAP007580	Anogam_AGAP007580-RB	0.686008	0.660046	0.723276	0.789309	0.691633	0.791579	0.626227	0.597579	0.634722	0.811239	0.840099	0.772359
Anogam_AGAP007581	Anogam_AGAP007581-RA	1	1	1	1	1	1	1	1	1	1	1	1
Anogam_AGAP007583	Anogam_AGAP007583-RB	0.0406874	0.100545	0.0692286	0.0740434	0.488966	0.0646199	0.0179192	0.0240931	0.0312307	0.506336	0.482729	0.489765
Anogam_AGAP007583	Anogam_AGAP007583-RA	0.959313	0.899455	0.930771	0.925957	0.511034	0.93538	0.982081	0.975907	0.968769	0.493664	0.517271	0.510235
Anogam_AGAP007585	Anogam_AGAP007585-RA	1	1	1	1	1	1	1	1	1	1	1	1
Anogam_AGAP013138	Anogam_AGAP013138-RA	nan	nan	nan	1	1	nan	1	nan	nan	1	1	1
Anogam_AGAP007588	Anogam_AGAP007588-RA	1	1	1	1	1	1	1	1	1	1	1	1
Anogam_AGAP007589	Anogam_AGAP007589-RA	1	1	1	1	1	1	1	1	1	1	1	1
Anogam_AGAP007591	Anogam_AGAP007591-RA	1	1	1	1	1	1	1	1	1	1	1	1
Anogam_AGAP007592	Anogam_AGAP007592-RA	1	1	1	1	1	1	1	1	1	1	1	1
Anogam_AGAP007593	Anogam_AGAP007593-RA	0.152102	0.0660023	0.207279	0.234284	0.116848	0.250752	0.122728	0.112542	0.0629954	0.118509	0.120109	0.111796
Anogam_AGAP007593	Anogam_AGAP007593-RB	0.847898	0.933998	0.792721	0.765716	0.883152	0.749248	0.877272	0.887458	0.937005	0.881491	0.879891	0.888204
Anogam_AGAP007594	Anogam_AGAP007594-RA	1	1	1	1	1	1	1	1	1	1	1	1
Anogam_AGAP007596	Anogam_AGAP007596-RA	1	1	1	1	1	1	1	1	1	1	1	1
Anogam_AGAP007599	Anogam_AGAP007599-RA	1	1	1	1	1	1	1	1	1	1	1	1
Anogam_AGAP007600	Anogam_AGAP007600-RA	1	1	1	1	1	1	1	1	1	1	1	1
Anogam_AGAP007602	Anogam_AGAP007602-RA	1	1	1	1	1	1	1	1	1	1	1	1
Anogam_AGAP007604	Anogam_AGAP007604-RA	1	1	1	1	1	1	1	1	1	1	1	1
Anogam_AGAP007607	Anogam_AGAP007607-RA	1	1	1	1	1	1	1	1	1	1	1	1
Anogam_AGAP007612	Anogam_AGAP007612-RA	1	nan	1	1	1	1	1	1	1	1	1	1
Anogam_AGAP007614	Anogam_AGAP007614-RA	1	1	1	1	1	1	1	1	1	1	1	1
Anogam_AGAP007617	Anogam_AGAP007617-RA	1	1	1	1	1	1	1	1	1	1	1	1
Anogam_AGAP007619	Anogam_AGAP007619-RA	1	1	1	1	1	1	1	1	1	1	1	1
Anogam_AGAP007620	Anogam_AGAP007620-RA	1	1	1	1	1	1	1	1	1	1	1	1
Anogam_AGAP007623	Anogam_AGAP007623-RA	1	1	1	1	1	1	1	1	1	1	1	1
Anogam_AGAP007625	Anogam_AGAP007625-RA	1	1	1	1	1	1	1	1	1	1	1	1
Anogam_AGAP007630	Anogam_AGAP007630-RA	1	1	1	1	1	1	1	1	1	1	1	1
Anogam_AGAP007634	Anogam_AGAP007634-RA	1	1	1	1	1	1	1	1	1	1	1	1
Anogam_AGAP007638	Anogam_AGAP007638-RA	1	1	1	1	1	1	1	1	1	1	1	1
Anogam_AGAP007639	Anogam_AGAP007639-RA	nan	1	nan	nan	nan	nan	nan	nan	nan	nan	nan	nan
Anogam_AGAP007642	Anogam_AGAP007642-RA	0.178572	0.230263	0.3	0.314286	0.19149	0.221277	0.172932	0.187192	0.156357	0.269118	0.244408	0.114865
Anogam_AGAP007642	Anogam_AGAP007642-RB	0.803571	0.736842	0.7	0.657143	0.702128	0.723404	0.819549	0.714286	0.783505	0.70098	0.702127	0.790541
Anogam_AGAP007642	Anogam_AGAP007642-RC	0.0178571	0.0328947	0	0.0285713	0.106383	0.0553191	0.0075188	0.0985221	0.0601374	0.029902	0.0534644	0.0945946
Anogam_AGAP007643	Anogam_AGAP007643-RB	0.415709	0.221229	0.607737	0.17938	0.266593	0.285565	0.671912	0.622919	0.644036	0.625083	0.647398	0.685919
Anogam_AGAP007643	Anogam_AGAP007643-RA	0.388057	0.582743	0.177042	0.622068	0.550342	0.506158	0.109175	0.153952	0.154334	0.164235	0.159576	0.147005
Anogam_AGAP007643	Anogam_AGAP007643-RD	0.136153	0.11611	0.12676	0.138248	0.0977177	0.134201	0.145089	0.152459	0.140276	0.136941	0.130836	0.110389
Anogam_AGAP007643	Anogam_AGAP007643-RC	0.0600811	0.079918	0.0884607	0.0603038	0.0853481	0.074076	0.073824	0.0706704	0.0613544	0.073741	0.0621896	0.0566866
Anogam_AGAP007645	Anogam_AGAP007645-RA	1	1	1	1	1	1	1	1	1	1	1	1
Anogam_AGAP007646	Anogam_AGAP007646-RA	1	1	1	1	1	1	1	1	1	1	1	1
Anogam_AGAP007647	Anogam_AGAP007647-RA	1	1	1	1	1	1	1	1	1	1	1	1
Anogam_AGAP007649	Anogam_AGAP007649-RA	1	nan	nan	1	1	nan	nan	nan	nan	1	1	1
Anogam_AGAP007650	Anogam_AGAP007650-RA	1	1	1	1	1	1	1	1	1	1	1	1
Anogam_AGAP007651	Anogam_AGAP007651-RA	1	1	1	1	1	1	1	1	1	1	1	1
Anogam_AGAP007655	Anogam_AGAP007655-RA	1	1	1	1	1	1	1	1	1	1	1	1
Anogam_AGAP007661	Anogam_AGAP007661-RA	1	1	1	1	1	1	1	1	1	1	1	1
Anogam_AGAP007663	Anogam_AGAP007663-RA	1	1	1	1	1	1	1	1	1	1	1	1
Anogam_AGAP007665	Anogam_AGAP007665-RA	1	1	1	1	1	1	1	1	1	1	1	1
Anogam_AGAP007666	Anogam_AGAP007666-RA	1	1	1	1	1	1	1	1	1	1	1	1
Anogam_AGAP007668	Anogam_AGAP007668-RA	1	1	1	1	1	1	1	1	1	1	1	1
Anogam_AGAP007670	Anogam_AGAP007670-RA	0.625701	0.679332	0.723514	0.832176	0.755235	0.735693	0.731436	0.716992	0.577663	0.891758	0.82472	0.687961
Anogam_AGAP007670	Anogam_AGAP007670-RB	0.374299	0.320668	0.276486	0.167824	0.244765	0.264307	0.268564	0.283008	0.422337	0.108242	0.17528	0.312039
Anogam_AGAP007672	Anogam_AGAP007672-RA	1	1	1	1	1	1	1	1	1	1	1	1
Anogam_AGAP007674	Anogam_AGAP007674-RA	0.176081	0.366302	0.059755	0.0488761	0.0655003	0.0992881	0.175508	0.114437	0.135861	0.155391	0.0620151	0.175184
Anogam_AGAP007674	Anogam_AGAP007674-RB	0.823919	0.633698	0.940245	0.951124	0.9345	0.900712	0.824492	0.885563	0.864139	0.844609	0.937985	0.824816
Anogam_AGAP007675	Anogam_AGAP007675-RA	1	1	nan	1	1	1	1	nan	nan	1	1	1
Anogam_AGAP007677	Anogam_AGAP007677-RA	1	1	1	1	1	1	1	1	nan	1	1	1
Anogam_AGAP007678	Anogam_AGAP007678-RA	nan	nan	nan	1	1	1	nan	1	nan	1	1	1
Anogam_AGAP007679	Anogam_AGAP007679-RA	1	1	nan	1	1	1	1	1	1	1	1	1
Anogam_AGAP007682	Anogam_AGAP007682-RA	1	1	1	1	1	1	1	1	1	1	1	1
Anogam_AGAP007683	Anogam_AGAP007683-RA	1	1	1	1	1	1	1	1	1	1	1	1
Anogam_AGAP007684	Anogam_AGAP007684-RB	0.0272419	0.605374	0.0133018	0.0876528	0.232299	0.051199	0.18946	0.407458	0.272672	0.705048	0.751182	0.80153
Anogam_AGAP007684	Anogam_AGAP007684-RA	0.972758	0.394626	0.986698	0.912347	0.767701	0.948801	0.81054	0.592542	0.727328	0.294952	0.248818	0.19847
Anogam_AGAP007686	Anogam_AGAP007686-RA	1	1	1	1	1	1	1	1	1	1	1	1
Anogam_AGAP007688	Anogam_AGAP007688-RA	1	1	1	1	1	1	1	1	1	1	1	1
Anogam_AGAP007693	Anogam_AGAP007693-RA	1	1	1	1	1	1	nan	nan	nan	1	1	1
Anogam_AGAP007695	Anogam_AGAP007695-RA	nan	1	1	1	nan	1	nan	nan	1	nan	nan	nan
Anogam_AGAP007698	Anogam_AGAP007698-RA	0.542789	0.521429	0.541008	0.411067	0.467454	0.452024	0.581591	0.589074	0.595757	0.440531	0.464432	0.43278
Anogam_AGAP007698	Anogam_AGAP007698-RB	0.457211	0.478571	0.458992	0.588933	0.532546	0.547976	0.418409	0.410926	0.404243	0.559469	0.535568	0.56722
Anogam_AGAP007698	Anogam_AGAP007698-RC	0	0	0	0	0	0	0	0	0	0	0	0
Anogam_AGAP007699	Anogam_AGAP007699-RA	0.0102437	0.01051	0.0165067	0.0155791	0.0217626	0.0243363	0.00319481	0.00407402	0.00421315	0.0215371	0.01097	0.00718683
Anogam_AGAP007699	Anogam_AGAP007699-RB	0.242731	0.311718	0.332239	0.371638	0.406004	0.327959	0.183918	0.200519	0.175084	0.382113	0.338232	0.388312
Anogam_AGAP007699	Anogam_AGAP007699-RC	0.747025	0.677772	0.651255	0.612783	0.572234	0.647705	0.812887	0.795407	0.820703	0.59635	0.650798	0.604501
Anogam_AGAP007701	Anogam_AGAP007701-RA	1	1	1	1	1	1	1	1	1	1	1	1
Anogam_AGAP007704	Anogam_AGAP007704-RA	1	1	1	1	1	1	1	1	1	1	1	1
Anogam_AGAP007706	Anogam_AGAP007706-RA	1	1	1	1	1	1	1	1	1	1	1	1
Anogam_AGAP007707	Anogam_AGAP007707-RA	nan	nan	nan	nan	1	nan	nan	nan	1	1	1	1
Anogam_AGAP007708	Anogam_AGAP007708-RA	1	1	1	1	1	1	1	1	1	1	1	1
Anogam_AGAP007709	Anogam_AGAP007709-RA	1	1	1	1	1	1	1	1	1	1	1	1
Anogam_AGAP007710	Anogam_AGAP007710-RA	1	1	1	1	1	1	1	1	1	1	1	1
Anogam_AGAP007711	Anogam_AGAP007711-RA	1	1	1	1	1	1	1	1	1	1	1	1
Anogam_AGAP007715	Anogam_AGAP007715-RA	1	1	1	1	1	1	1	1	1	1	1	1
Anogam_AGAP007716	Anogam_AGAP007716-RA	1	1	1	1	1	1	nan	1	1	1	1	1
Anogam_AGAP007717	Anogam_AGAP007717-RA	0.0327726	0.0230609	0.0332693	0.0316674	0.0387105	0.0265281	0.0317214	0.0335535	0.081728	0.0295097	0.0313222	0.0424756
Anogam_AGAP007717	Anogam_AGAP007717-RB	0.0741235	0.114091	0.136569	0.0822122	0.0731797	0.0611305	0.262958	0.34708	0.411315	0.336475	0.2683	0.308868
Anogam_AGAP007717	Anogam_AGAP007717-RC	0.893104	0.862848	0.830162	0.88612	0.88811	0.912341	0.705321	0.619367	0.506957	0.634015	0.700378	0.648657
Anogam_AGAP007719	Anogam_AGAP007719-RA	1	nan	nan	1	nan	nan	nan	nan	nan	1	nan	1
Anogam_AGAP007720	Anogam_AGAP007720-RA	1	1	1	1	1	1	1	1	nan	1	1	1
Anogam_AGAP007723	Anogam_AGAP007723-RA	1	1	1	1	1	1	1	1	1	1	1	1
Anogam_AGAP007725	Anogam_AGAP007725-RA	1	1	1	1	1	1	1	1	1	1	1	1
Anogam_AGAP007728	Anogam_AGAP007728-RA	1	1	1	1	1	1	1	1	1	1	1	1
Anogam_AGAP029098_locus1	Anogam_AGAP029098-RC	nan	nan	nan	nan	nan	nan	nan	nan	nan	1	1	nan
Anogam_AGAP029098_locus2	Anogam_AGAP029098-RA	nan	nan	nan	nan	nan	nan	nan	nan	nan	nan	nan	nan
Anogam_AGAP029098_locus3	Anogam_AGAP029098-RB	nan	nan	nan	nan	nan	nan	nan	nan	nan	nan	nan	nan
Anogam_AGAP029098_locus4	Anogam_AGAP029098-RE	nan	nan	nan	nan	nan	nan	nan	nan	nan	nan	nan	nan
Anogam_AGAP029098_locus5	Anogam_AGAP029098-RD	nan	nan	nan	nan	nan	nan	nan	nan	nan	nan	nan	nan
Anogam_AGAP004678	Anogam_AGAP004678-RA	1	1	1	1	1	1	1	1	1	1	1	1
Anogam_AGAP004679	Anogam_AGAP004679-RB	0.367406	0.212842	0.382207	0.4594	0.278064	0.44045	0.253455	0.203512	0.357674	0.46353	0.406481	0.397706
Anogam_AGAP004679	Anogam_AGAP004679-RA	0.632594	0.787158	0.617793	0.5406	0.721936	0.55955	0.746545	0.796488	0.642326	0.53647	0.593519	0.602294
Anogam_AGAP004680	Anogam_AGAP004680-RA	1	1	1	1	1	1	nan	1	1	1	1	1
Anogam_AGAP004684	Anogam_AGAP004684-RA	1	1	1	1	1	1	1	1	1	1	1	1
Anogam_AGAP004686	Anogam_AGAP004686-RA	1	1	0.986799	0.983026	1	0.992158	1	0.988135	0.963538	0.984394	0.967045	0.968252
Anogam_AGAP004686	Anogam_AGAP004686-RB	0	0	0.0132006	0.0169737	0	0.00784203	0	0.0118648	0.0364619	0.0156061	0.032955	0.0317481
Anogam_AGAP004689	Anogam_AGAP004689-RA	0.602131	0.487491	0.466424	0.601586	0.61863	0.54485	0.712119	0.580882	0.655971	0.605011	0.580177	0.60963
Anogam_AGAP004689	Anogam_AGAP004689-RB	0	0	0	0	0	0	0	0	0	0	0	0
Anogam_AGAP004689	Anogam_AGAP004689-RC	0.397869	0.512509	0.533576	0.398414	0.38137	0.45515	0.287881	0.419118	0.344029	0.394989	0.419823	0.39037
Anogam_AGAP028433	Anogam_AGAP028433-RA	1	1	1	1	1	1	1	1	1	1	1	1
Anogam_AGAP004692	Anogam_AGAP004692-RA	0.807197	0.8698	0.799096	0.82396	0.839374	0.843557	0.769294	0.792069	0.753484	0.553082	0.691863	0.682344
Anogam_AGAP004692	Anogam_AGAP004692-RB	0.08552	0.0749206	0.0908336	0.0673688	0.0844811	0.0770832	0.118024	0.11685	0.163288	0.219776	0.103116	0.164409
Anogam_AGAP004692	Anogam_AGAP004692-RC	0	0	0	0.00193489	0.00740882	0	0	0	0	0.00645742	0	0
Anogam_AGAP004692	Anogam_AGAP004692-RD	0.107283	0.0552794	0.110071	0.106737	0.068736	0.0793602	0.112681	0.0910816	0.083228	0.220684	0.205021	0.153246
Anogam_AGAP028434	Anogam_AGAP028434-RA	1	1	1	1	1	1	1	1	1	1	1	1
Anogam_AGAP028435	Anogam_AGAP028435-RA	1	1	1	1	1	1	1	1	1	1	1	1
Anogam_AGAP004695	Anogam_AGAP004695-RA	1	1	1	1	1	1	1	1	1	1	1	1
Anogam_AGAP004699	Anogam_AGAP004699-RA	1	1	1	1	1	1	1	1	1	1	1	1
Anogam_AGAP004700	Anogam_AGAP004700-RA	1	1	1	0.547121	1	0.53856	0.909708	0.7842	0.931873	0.975156	0.957537	0.893794
Anogam_AGAP004700	Anogam_AGAP004700-RB	0	0	0	0.452879	0	0.46144	0.0902916	0.2158	0.0681271	0.0248437	0.0424628	0.106206
Anogam_AGAP004701	Anogam_AGAP004701-RA	1	1	1	1	1	1	1	1	1	1	1	1
Anogam_AGAP004702	Anogam_AGAP004702-RA	1	1	1	1	1	1	1	1	1	1	1	1
Anogam_AGAP004703	Anogam_AGAP004703-RA	1	1	1	1	1	1	1	1	1	1	1	1
Anogam_AGAP004706	Anogam_AGAP004706-RA	nan	nan	nan	nan	1	nan	nan	1	nan	nan	1	1
Anogam_AGAP004707	Anogam_AGAP004707-RA	0.0679664	0.184007	0.00132718	0.0147896	0.377032	0	0	0	0.0317314	0.295239	0	0
Anogam_AGAP004707	Anogam_AGAP004707-RB	0.191201	0.186808	5.96218e-07	0.225805	0.308674	0.294769	0	0	0.00327497	0.115242	1.22474e-05	0.242987
Anogam_AGAP004707	Anogam_AGAP004707-RC	0	0.000233102	0	0	0.000671549	0	0.873089	2.1834e-06	1.87923e-05	0.0910626	0	0.220467
Anogam_AGAP004707	Anogam_AGAP004707-RD	0	0.110791	0	0	0.157592	0.111826	0	0	0.00655668	0.0371025	6.73609e-06	0.151229
Anogam_AGAP004707	Anogam_AGAP004707-RE	0.0803426	0	0.141769	0.164703	0	0	0.126911	0.347426	0.366429	0.00688385	0.14113	0.232815
Anogam_AGAP004707	Anogam_AGAP004707-RG	0.323631	0.0861499	0	0	0	0	0	0.0941564	0	0	0.136854	0
Anogam_AGAP004707	Anogam_AGAP004707-RH	0.209254	0.10452	0.232654	0	0	0.324632	0	0.133466	0.0490185	0.131708	0.210244	0.0867825
Anogam_AGAP004707	Anogam_AGAP004707-RI	0.127604	0.0205234	5.96218e-07	0.431599	0.155637	0	0	2.42601e-07	0.022744	0.166933	0	0
Anogam_AGAP004707	Anogam_AGAP004707-RJ	0	0.180037	0.279164	0	2.23477e-07	0.196141	0	0.0166662	0.0519503	0.0560543	0.327726	0.0406388
Anogam_AGAP004707	Anogam_AGAP004707-RK	0	0.0195722	0.345085	0	0	0	0	0.318229	0.355986	0.0822149	0	0
Anogam_AGAP004707	Anogam_AGAP004707-RL	0	0	0	0.163103	0	0	0	0.0900535	0.00893983	0	0	1.89683e-05
Anogam_AGAP004707	Anogam_AGAP004707-RM	0	0.107358	0	0	0.00039332	0.0726316	0	0	0.103351	0.0175598	0.184027	0.0250613
Anogam_AGAP004709	Anogam_AGAP004709-RA	1	1	1	1	1	1	1	1	1	1	1	1
Anogam_AGAP004711	Anogam_AGAP004711-RA	1	1	1	1	1	1	1	1	1	1	1	1
Anogam_AGAP004712	Anogam_AGAP004712-RA	1	1	1	nan	1	1	nan	nan	1	1	1	1
Anogam_AGAP004714	Anogam_AGAP004714-RA	1	1	1	1	1	1	1	1	1	1	1	1
Anogam_AGAP004715	Anogam_AGAP004715-RA	1	1	1	1	1	1	1	1	1	1	1	1
Anogam_AGAP004716	Anogam_AGAP004716-RA	nan	nan	nan	nan	nan	nan	nan	nan	nan	nan	nan	1
Anogam_AGAP004717	Anogam_AGAP004717-RA	nan	nan	nan	nan	0	0	0	0	0	0.621987	0	0
Anogam_AGAP004717	Anogam_AGAP004717-RB	nan	nan	nan	nan	0	0	0	0.77388	0	0	1	0
Anogam_AGAP004717	Anogam_AGAP004717-RC	nan	nan	nan	nan	1	1	1	0.22612	1	0.378013	0	1
Anogam_AGAP004718	Anogam_AGAP004718-RA	1	1	1	1	1	1	1	1	1	1	1	1
Anogam_AGAP004720	Anogam_AGAP004720-RA	1	1	1	1	1	1	nan	1	1	1	1	1
Anogam_AGAP004723	Anogam_AGAP004723-RA	1	1	1	1	1	1	1	1	1	1	1	1
Anogam_AGAP004724	Anogam_AGAP004724-RA	1	nan	nan	1	1	1	nan	1	1	1	1	1
Anogam_AGAP004725	Anogam_AGAP004725-RA	1	1	1	1	1	1	1	1	1	1	1	1
Anogam_AGAP004727	Anogam_AGAP004727-RA	nan	nan	nan	1	1	1	1	1	nan	1	1	1
Anogam_AGAP004730	Anogam_AGAP004730-RA	1	nan	nan	nan	1	1	1	1	1	1	1	1
Anogam_AGAP004733	Anogam_AGAP004733-RA	1	1	1	1	1	1	1	1	1	1	1	nan
Anogam_AGAP004736	Anogam_AGAP004736-RA	1	1	1	1	1	1	1	1	1	1	1	1
Anogam_AGAP004737	Anogam_AGAP004737-RA	1	1	1	1	1	1	1	1	1	1	1	1
Anogam_AGAP004739	Anogam_AGAP004739-RA	1	1	1	1	1	1	1	1	1	1	1	1
Anogam_AGAP004743	Anogam_AGAP004743-RA	1	1	1	1	1	1	1	1	1	1	1	1
Anogam_AGAP004744	Anogam_AGAP004744-RA	1	1	1	1	1	1	1	1	1	1	1	1
Anogam_AGAP004746	Anogam_AGAP004746-RA	1	1	1	1	1	1	1	1	1	1	1	1
Anogam_AGAP004749	Anogam_AGAP004749-RA	0.149784	0.0573468	0.12399	0.0318273	0.144754	0.0504727	0.0585685	0.150699	0.115838	0.156092	0.301584	0.217287
Anogam_AGAP004749	Anogam_AGAP004749-RB	0.850216	0.942653	0.87601	0.968173	0.855246	0.949527	0.941431	0.849301	0.884162	0.843908	0.698416	0.782713
Anogam_AGAP004751	Anogam_AGAP004751-RA	1	1	1	1	1	1	1	1	1	1	1	1
Anogam_AGAP004752	Anogam_AGAP004752-RA	1	1	1	1	1	1	1	1	1	1	1	1
Anogam_AGAP004754	Anogam_AGAP004754-RA	1	1	1	1	1	1	1	1	1	1	1	1
Anogam_AGAP004755	Anogam_AGAP004755-RA	1	1	1	1	1	1	1	1	1	1	1	1
Anogam_AGAP013546	Anogam_AGAP013546-RA	1	1	1	1	1	1	1	1	1	1	1	1
Anogam_AGAP004757	Anogam_AGAP004757-RA	1	1	1	1	1	1	1	1	1	1	1	1
Anogam_AGAP004759	Anogam_AGAP004759-RA	1	1	1	1	1	1	1	1	1	1	1	1
Anogam_AGAP004761	Anogam_AGAP004761-RA	1	1	1	1	1	1	1	1	1	1	1	1
Anogam_AGAP004762	Anogam_AGAP004762-RA	1	1	1	1	1	1	1	1	1	1	1	1
Anogam_AGAP004763	Anogam_AGAP004763-RA	1	1	1	1	1	1	1	1	1	1	1	1
Anogam_AGAP004765	Anogam_AGAP004765-RA	1	1	1	1	1	1	1	1	1	1	1	1
Anogam_AGAP004766	Anogam_AGAP004766-RB	0.433731	0.435804	0.593612	0.489844	0.422288	0.421961	0.363727	0.360386	0.284135	0.372695	0.35307	0.360238
Anogam_AGAP004766	Anogam_AGAP004766-RA	0.488968	0.436857	0.371717	0.421535	0.43498	0.531965	0.511496	0.629468	0.602419	0.541558	0.581567	0.556706
Anogam_AGAP004766	Anogam_AGAP004766-RF	0.0564389	0.076271	0.0346713	0.0401259	0.134202	0.0211711	0.0764993	0.00751224	0.0719055	0.0693714	0.0430628	0.0781012
Anogam_AGAP004766	Anogam_AGAP004766-RD	0.0208615	0.0510677	0	0.0484951	0.00852951	0.0249022	0.0482773	0.00263392	0.0415409	0.0163758	0.0223008	0.00495456
Anogam_AGAP004769	Anogam_AGAP004769-RA	1	1	1	1	1	1	1	1	1	1	1	1
Anogam_AGAP004773	Anogam_AGAP004773-RA	1	1	1	1	1	1	1	1	1	1	1	1
Anogam_AGAP004774	Anogam_AGAP004774-RA	1	1	1	1	1	1	1	1	1	1	1	1
Anogam_AGAP004776	Anogam_AGAP004776-RA	1	1	1	1	1	1	1	1	1	1	1	1
Anogam_AGAP004778	Anogam_AGAP004778-RA	1	1	1	1	1	1	1	1	1	1	1	1
Anogam_AGAP004784	Anogam_AGAP004784-RA	1	1	1	1	1	1	1	1	1	1	1	1
Anogam_AGAP004785	Anogam_AGAP004785-RA	1	1	1	1	1	1	1	1	1	1	1	1
Anogam_AGAP004786	Anogam_AGAP004786-RA	1	1	1	1	1	1	1	1	1	1	1	1
Anogam_AGAP004788	Anogam_AGAP004788-RA	nan	nan	nan	nan	1	nan	1	1	nan	nan	nan	1
Anogam_AGAP004790	Anogam_AGAP004790-RA	1	1	1	1	1	1	1	1	1	1	1	1
Anogam_AGAP004792	Anogam_AGAP004792-RA	0.0271532	0.117807	0.00940366	0	0.0164825	0.0282151	0	0.012602	0.0320226	0.0139421	0.0155687	0.0252373
Anogam_AGAP004792	Anogam_AGAP004792-RB	0.972847	0.882193	0.990596	1	0.983517	0.971785	1	0.987398	0.967977	0.986058	0.984431	0.974763
Anogam_AGAP004793	Anogam_AGAP004793-RA	0.820237	0.450582	0.351223	0.510844	0.799749	0.624058	0.361078	0.798199	0.647619	0.574208	0.724647	0.758361
Anogam_AGAP004793	Anogam_AGAP004793-RB	0.179763	0.549418	0.648777	0.489156	0.200251	0.375942	0.638922	0.201801	0.352381	0.425792	0.275353	0.241639
Anogam_AGAP004794	Anogam_AGAP004794-RA	1	1	1	1	1	1	1	1	1	1	1	1
Anogam_AGAP004801	Anogam_AGAP004801-RA	0.405074	0.231311	0.135411	0.223044	0.323346	0.121803	0.452999	0.879645	0.346545	0.323254	0.273684	0.181165
Anogam_AGAP004801	Anogam_AGAP004801-RC	0.424498	0.348205	0.476518	0.535521	0.508407	0.598577	0.253263	0	0.395639	0.309803	0.239577	0.125471
Anogam_AGAP004801	Anogam_AGAP004801-RB	0.170428	0.420484	0.388071	0.241436	0.168247	0.27962	0.293738	0.120355	0.257816	0.366943	0.486739	0.693364
Anogam_AGAP004802	Anogam_AGAP004802-RA	1	1	1	1	1	1	1	1	1	1	1	1
Anogam_AGAP004804	Anogam_AGAP004804-RA	1	1	1	1	1	1	1	1	1	1	1	1
Anogam_AGAP004805	Anogam_AGAP004805-RB	0.0600594	0.132575	0.101787	0.0918233	0.0999541	0.0480826	0.155686	0.226905	0.161104	0.110135	0.029835	0.108332
Anogam_AGAP004805	Anogam_AGAP004805-RA	0.939941	0.867425	0.898213	0.908177	0.900046	0.951917	0.844314	0.773095	0.838896	0.889865	0.970165	0.891668
Anogam_AGAP004807	Anogam_AGAP004807-RA	1	1	1	1	1	1	1	1	1	1	1	1
Anogam_AGAP004811	Anogam_AGAP004811-RA	1	1	1	1	1	1	1	1	1	1	1	1
Anogam_AGAP004813	Anogam_AGAP004813-RA	nan	nan	nan	nan	nan	nan	1	nan	1	nan	nan	nan
Anogam_AGAP004814	Anogam_AGAP004814-RA	nan	nan	nan	1	nan	nan	nan	nan	1	1	1	1
Anogam_AGAP004818	Anogam_AGAP004818-RA	1	1	1	1	1	1	1	1	1	1	1	1
Anogam_AGAP004820	Anogam_AGAP004820-RA	1	1	1	1	1	1	1	1	1	1	1	1
Anogam_AGAP004825	Anogam_AGAP004825-RA	1	1	1	1	1	nan	1	1	1	1	1	1
Anogam_AGAP004827	Anogam_AGAP004827-RA	1	1	1	1	1	1	1	1	1	1	1	1
Anogam_AGAP004828	Anogam_AGAP004828-RA	1	1	nan	1	1	1	nan	nan	nan	1	1	1
Anogam_AGAP004831	Anogam_AGAP004831-RA	nan	nan	nan	nan	1	nan	nan	1	nan	nan	nan	nan
Anogam_AGAP004833	Anogam_AGAP004833-RA	1	1	1	1	1	1	1	1	1	1	1	1
Anogam_AGAP004835	Anogam_AGAP004835-RA	1	1	1	1	1	1	1	1	1	1	1	1
Anogam_AGAP004839	Anogam_AGAP004839-RA	1	1	1	1	1	1	1	1	1	1	1	1
Anogam_AGAP013627	Anogam_AGAP013627-RA	1	nan	1	nan	nan	1	1	1	1	1	1	1
Anogam_AGAP004842	Anogam_AGAP004842-RA	0.0417064	0.0677186	0	0.0134923	0.116547	0.102342	0	0.0074545	0	0.122158	0.20772	0.198857
Anogam_AGAP004842	Anogam_AGAP004842-RB	0.958294	0.932281	1	0.986508	0.883453	0.897658	1	0.992545	1	0.877842	0.79228	0.801143
Anogam_AGAP004843	Anogam_AGAP004843-RA	1	1	1	1	1	1	1	1	1	1	1	1
Anogam_AGAP004845	Anogam_AGAP004845-RA	1	0.986318	1	1	1	1	0.995021	1	0.988963	0.995101	1	1
Anogam_AGAP004845	Anogam_AGAP004845-RB	0	0.0136824	0	0	0	0	0.00497928	0	0.0110374	0.00489855	0	0
Anogam_AGAP004846	Anogam_AGAP004846-RA	0.171404	0.234624	0.292958	0.530778	0.326779	0.781614	0.016793	0.0316751	0.0433546	0.0684363	0.0235114	0.07788
Anogam_AGAP004846	Anogam_AGAP004846-RB	0.828596	0.588181	0.70703	0.407441	0.221564	0.218386	0.983104	0.968133	0.950216	0.785531	0.682715	0.716169
Anogam_AGAP004846	Anogam_AGAP004846-RC	9.3103e-08	0.177195	1.23071e-05	0.061781	0.451657	0	0.000103381	0.000191812	0.0064295	0.146032	0.293773	0.205951
Anogam_AGAP004847	Anogam_AGAP004847-RA	1	1	1	1	1	1	1	1	1	1	1	1
Anogam_AGAP004849	Anogam_AGAP004849-RA	1	1	1	1	1	1	1	1	1	1	1	1
Anogam_AGAP004854	Anogam_AGAP004854-RA	1	1	1	1	1	1	1	1	1	1	1	1
Anogam_AGAP004855	Anogam_AGAP004855-RA	1	1	1	1	1	1	1	1	1	1	1	1
Anogam_AGAP004856	Anogam_AGAP004856-RA	1	1	1	1	1	1	1	1	1	1	1	1
Anogam_AGAP004862	Anogam_AGAP004862-RA	nan	nan	nan	1	1	1	nan	1	1	1	1	1
Anogam_AGAP004863	Anogam_AGAP004863-RA	1	1	1	1	1	1	1	1	1	1	1	1
Anogam_AGAP004867	Anogam_AGAP004867-RA	1	1	1	1	1	1	1	1	1	1	1	1
Anogam_AGAP004870	Anogam_AGAP004870-RA	1	1	1	1	1	1	1	1	1	1	1	1
Anogam_AGAP004871	Anogam_AGAP004871-RA	1	1	1	1	1	1	nan	1	1	1	1	1
Anogam_AGAP004876	Anogam_AGAP004876-RA	nan	1	nan	nan	nan	1	1	nan	nan	nan	nan	nan
Anogam_AGAP004877	Anogam_AGAP004877-RA	0.992275	0.81586	1	nan	1	1	0.912745	0.995923	0.979693	0.989837	1	0.966743
Anogam_AGAP004877	Anogam_AGAP004877-RB	0.00772524	0.18414	0	nan	0	0	0.0872553	0.0040766	0.0203069	0.0101631	0	0.0332575
Anogam_AGAP004879	Anogam_AGAP004879-RA	1	nan	nan	nan	1	nan	nan	1	1	1	1	1
Anogam_AGAP004880	Anogam_AGAP004880-RB	0.761918	0.602324	0.700046	0.684721	0.713375	0.634898	0.717927	0.844749	0.771196	0.625009	0.680397	0.619606
Anogam_AGAP004880	Anogam_AGAP004880-RC	0.0469965	0.0836238	0.0408397	0.0387112	0.0776771	0.0498342	0.0480052	0.0396734	0.0228561	0.072106	0.0697044	0.146427
Anogam_AGAP004880	Anogam_AGAP004880-RA	0.191086	0.314052	0.259115	0.276568	0.208948	0.315268	0.234068	0.115577	0.205948	0.302885	0.249899	0.233967
Anogam_AGAP004881	Anogam_AGAP004881-RA	1	1	1	1	1	1	1	1	1	1	1	1
Anogam_AGAP004883	Anogam_AGAP004883-RA	1	1	1	1	1	1	1	1	1	1	1	1
Anogam_AGAP004885	Anogam_AGAP004885-RA	1	1	1	1	1	1	1	1	1	1	1	1
Anogam_AGAP004888	Anogam_AGAP004888-RA	1	1	nan	1	1	1	1	nan	nan	1	1	1
Anogam_AGAP004890	Anogam_AGAP004890-RA	0.24942	0.122295	0.164028	0.207111	0.140554	0.0643054	0.776314	0.558796	0.576936	0.705842	0.72304	0.506843
Anogam_AGAP004890	Anogam_AGAP004890-RB	0.75058	0.877705	0.835972	0.792889	0.859446	0.935695	0.223686	0.441204	0.423064	0.294158	0.27696	0.493157
Anogam_AGAP004892	Anogam_AGAP004892-RA	1	1	1	1	1	1	1	1	1	1	1	1
Anogam_AGAP029000	Anogam_AGAP029000-RA	nan	nan	nan	nan	nan	nan	nan	nan	nan	nan	nan	nan
Anogam_AGAP004897	Anogam_AGAP004897-RA	nan	1	1	1	nan	nan	nan	nan	nan	1	1	nan
Anogam_AGAP004899	Anogam_AGAP004899-RA	1	1	1	nan	nan	nan	nan	nan	1	nan	nan	nan
Anogam_AGAP004902	Anogam_AGAP004902-RB	0	0	0	0.342099	0	0	0.190616	0	0	0.0846243	0	0
Anogam_AGAP004902	Anogam_AGAP004902-RC	0.230413	0.292314	0.267108	0	0.371473	0.461027	0.190601	0.554294	0.638173	0.0846243	0.357663	0.202798
Anogam_AGAP004902	Anogam_AGAP004902-RA	0.769587	0.707686	0.732892	0.657901	0.628527	0.538973	0.618783	0.445706	0.361827	0.830751	0.642337	0.797202
Anogam_AGAP004904	Anogam_AGAP004904-RA	1	1	1	1	1	1	1	1	1	1	1	1
Anogam_AGAP004905	Anogam_AGAP004905-RA	1	1	1	1	1	1	1	1	1	1	1	1
Anogam_AGAP004906	Anogam_AGAP004906-RA	1	1	1	1	1	1	1	1	1	1	1	1
Anogam_AGAP004907	Anogam_AGAP004907-RA	1	1	nan	1	1	1	1	1	nan	1	1	1
Anogam_AGAP004909	Anogam_AGAP004909-RA	1	1	1	1	1	1	1	1	1	1	1	1
Anogam_AGAP004912	Anogam_AGAP004912-RA	0.121734	0.168213	0.148357	0.117186	0.327928	0.251795	0.173139	0.107893	0.107216	0.16457	0.139623	0.156581
Anogam_AGAP004912	Anogam_AGAP004912-RB	0.878266	0.831787	0.851643	0.882814	0.672072	0.748205	0.826861	0.892107	0.892784	0.83543	0.860377	0.843419
Anogam_AGAP004913	Anogam_AGAP004913-RA	nan	nan	nan	nan	1	nan	nan	1	1	nan	nan	1
Anogam_AGAP004914	Anogam_AGAP004914-RA	nan	nan	nan	1	1	1	nan	nan	1	1	1	1
Anogam_AGAP004915	Anogam_AGAP004915-RA	1	1	1	1	1	1	1	1	1	1	1	1
Anogam_AGAP004919	Anogam_AGAP004919-RA	1	1	1	1	1	1	1	1	1	1	1	1
Anogam_AGAP004920	Anogam_AGAP004920-RA	1	1	1	1	1	1	1	1	1	1	1	1
Anogam_AGAP004929	Anogam_AGAP004929-RA	1	1	1	1	1	1	1	1	1	1	1	1
Anogam_AGAP004930	Anogam_AGAP004930-RA	1	1	1	1	1	1	nan	1	1	1	1	1
Anogam_AGAP004931	Anogam_AGAP004931-RA	1	1	1	1	1	1	1	1	1	1	1	1
Anogam_AGAP028394	Anogam_AGAP028394-RA	1	1	1	1	1	1	1	1	1	1	1	1
Anogam_AGAP004932	Anogam_AGAP004932-RA	1	1	1	1	1	1	1	1	1	1	1	1
Anogam_AGAP004935	Anogam_AGAP004935-RA	1	1	1	1	1	1	1	1	1	1	1	1
Anogam_AGAP004936	Anogam_AGAP004936-RA	1	1	1	1	1	1	1	1	1	1	1	1
Anogam_AGAP004940	Anogam_AGAP004940-RA	1	1	1	1	1	1	1	1	1	1	1	1
Anogam_AGAP004943	Anogam_AGAP004943-RA	1.11908e-05	0.468565	1	0	0	0	1	nan	1	0.468166	0	0.267371
Anogam_AGAP004943	Anogam_AGAP004943-RB	0.377965	0.283198	0	1	0.636086	0.400928	0	nan	0	0.107377	1	0.340165
Anogam_AGAP004943	Anogam_AGAP004943-RC	0.622024	0.248237	0	0	0.363914	0.599072	0	nan	0	0.424456	0	0.392465
Anogam_AGAP004947	Anogam_AGAP004947-RA	1	1	1	1	1	1	nan	1	nan	1	1	1
Anogam_AGAP004949	Anogam_AGAP004949-RA	1	1	1	1	1	1	1	1	1	1	1	1
Anogam_AGAP004950	Anogam_AGAP004950-RA	1	1	1	1	1	1	1	1	1	1	1	1
Anogam_AGAP004952	Anogam_AGAP004952-RA	1	1	1	1	1	1	1	1	1	1	1	1
Anogam_AGAP004955	Anogam_AGAP004955-RB	0.257223	0.226215	0.436425	0.343914	0.433117	0.518058	0.196107	0.336899	0.330374	0.504763	0.33143	0.256177
Anogam_AGAP004955	Anogam_AGAP004955-RA	0.742777	0.773785	0.563575	0.656086	0.566883	0.481942	0.803893	0.663101	0.669626	0.495237	0.66857	0.743823
Anogam_AGAP004957	Anogam_AGAP004957-RA	1	1	1	1	nan	1	1	1	1	1	1	1
Anogam_AGAP004959	Anogam_AGAP004959-RA	0.127012	0.0357658	0.0698084	0.02685	0.0336266	0.00338695	0.142645	0	0.018679	0.00530972	0.0223418	0.0562978
Anogam_AGAP004959	Anogam_AGAP004959-RB	0.872988	0.964234	0.930192	0.97315	0.966373	0.996613	0.857355	1	0.981321	0.99469	0.977658	0.943702
Anogam_AGAP004961	Anogam_AGAP004961-RA	nan	nan	1	nan	1	nan	nan	nan	1	nan	1	1
Anogam_AGAP004963	Anogam_AGAP004963-RA	1	1	1	1	1	1	1	1	1	1	1	1
Anogam_AGAP004965	Anogam_AGAP004965-RB	0.798031	0.32275	0.433114	0.863895	0.647094	0.848232	0.577575	0.790447	0.808463	0.910015	0.81693	0.810288
Anogam_AGAP004965	Anogam_AGAP004965-RA	0.201969	0.67725	0.566886	0.136105	0.352906	0.151768	0.422425	0.209553	0.191537	0.0899846	0.18307	0.189712
Anogam_AGAP028425	Anogam_AGAP028425-RA	1	1	1	1	1	1	1	1	1	1	1	1
Anogam_AGAP004969	Anogam_AGAP004969-RA	nan	1	1	nan	nan	nan	nan	nan	1	nan	1	nan
Anogam_AGAP004970	Anogam_AGAP004970-RA	1	1	1	1	1	1	1	1	1	1	1	1
Anogam_AGAP004971	Anogam_AGAP004971-RA	nan	nan	nan	nan	1	1	nan	nan	1	nan	nan	nan
Anogam_AGAP004973	Anogam_AGAP004973-RA	1	nan	nan	nan	nan	nan	nan	1	nan	1	1	1
Anogam_AGAP004974	Anogam_AGAP004974-RA	nan	nan	nan	nan	nan	nan	nan	nan	nan	1	nan	nan
Anogam_AGAP004984	Anogam_AGAP004984-RA	1	1	1	1	1	1	1	1	1	1	1	1
Anogam_AGAP004986	Anogam_AGAP004986-RA	1	1	1	1	1	1	1	1	1	1	1	1
Anogam_AGAP004987	Anogam_AGAP004987-RA	nan	1	1	nan	1	1	nan	1	nan	1	1	nan
Anogam_AGAP004988	Anogam_AGAP004988-RA	1	1	1	1	1	1	1	1	nan	1	1	1
Anogam_AGAP004990	Anogam_AGAP004990-RA	1	1	1	1	1	1	1	1	1	1	1	1
Anogam_AGAP004992	Anogam_AGAP004992-RA	1	1	1	1	1	1	1	1	1	1	1	1
Anogam_AGAP004993	Anogam_AGAP004993-RA	1	1	1	1	1	1	1	1	1	1	1	1
Anogam_AGAP004997	Anogam_AGAP004997-RA	nan	1	nan	1	nan	nan	nan	nan	1	1	1	1
Anogam_AGAP004998	Anogam_AGAP004998-RA	nan	nan	nan	nan	nan	nan	nan	nan	nan	nan	nan	nan
Anogam_AGAP005000	Anogam_AGAP005000-RA	nan	nan	nan	nan	nan	nan	nan	nan	nan	nan	nan	nan
Anogam_AGAP005004	Anogam_AGAP005004-RA	1	1	1	1	1	1	1	1	1	1	1	1
Anogam_AGAP005005	Anogam_AGAP005005-RA	1	1	1	1	1	1	1	1	1	1	1	1
Anogam_AGAP005006	Anogam_AGAP005006-RA	1	1	1	1	1	1	1	1	1	1	1	1
Anogam_AGAP005009	Anogam_AGAP005009-RA	1	1	1	1	1	1	1	1	1	1	1	1
Anogam_AGAP005010	Anogam_AGAP005010-RA	1	1	nan	1	1	1	1	1	1	1	1	1
Anogam_AGAP005011	Anogam_AGAP005011-RA	1	1	1	1	1	1	1	1	1	1	1	1
Anogam_AGAP005012	Anogam_AGAP005012-RA	1	1	1	1	1	1	1	1	1	1	1	1
Anogam_AGAP005014	Anogam_AGAP005014-RA	1	1	1	1	1	1	1	1	1	1	1	1
Anogam_AGAP005017	Anogam_AGAP005017-RA	1	1	1	1	1	1	1	1	1	1	1	1
Anogam_AGAP005019	Anogam_AGAP005019-RA	1	1	1	1	1	1	1	1	1	1	1	1
Anogam_AGAP005022	Anogam_AGAP005022-RA	1	1	1	1	1	1	1	1	1	1	1	1
Anogam_AGAP005024	Anogam_AGAP005024-RA	1	nan	1	1	1	1	1	1	1	1	1	1
Anogam_AGAP005026	Anogam_AGAP005026-RA	1	1	1	1	1	1	1	1	1	1	1	1
Anogam_AGAP005028	Anogam_AGAP005028-RA	1	1	nan	nan	1	1	1	1	nan	1	1	1
[truncated: 13,350 more rows]

## Sheet: Sheet 2
isoform	dPSI	pval	pval.corr	comparison	group.i	group.j	PSI.i	PSI.j
Anogam_AGAP004677-RA	-0.200127	0.0239282	0.120644	OeCa F	Oe	Ca	0.205243	0.405371
Anogam_AGAP004677-RB	0.200127	0.0204387	0.120644	OeCa F	Oe	Ca	0.794757	0.594629
Anogam_AGAP004682-RA	0	0.0927218	0.120644	OeCa F	Oe	Ca	1	1
Anogam_AGAP028431-RA	0	0.0977069	0.120644	OeCa F	Oe	Ca	1	1
Anogam_AGAP004683-RA	0	0.10668	0.120644	OeCa F	Oe	Ca	1	1
Anogam_AGAP004685-RA	0.00712455	0.0977069	0.120644	OeCa F	Oe	Ca	0.990563	0.983438
Anogam_AGAP004685-RB	-0.00712455	0.0932203	0.120644	OeCa F	Oe	Ca	0.00943702	0.0165616
Anogam_AGAP028432-RA	0	0.101695	0.120644	OeCa F	Oe	Ca	1	1
Anogam_AGAP004688-RA	0	0.0977069	0.120644	OeCa F	Oe	Ca	1	1
Anogam_AGAP004690-RA	0	0.104187	0.120644	OeCa F	Oe	Ca	1	1
Anogam_AGAP004691-RA	0	0.0957129	0.120644	OeCa F	Oe	Ca	1	1
Anogam_AGAP004693-RA	0	0.084493	0.120644	OeCa F	Oe	Ca	1	1
Anogam_AGAP004694-RA	0	0.0962114	0.120644	OeCa F	Oe	Ca	1	1
Anogam_AGAP004696-RA	0	0.0957129	0.120644	OeCa F	Oe	Ca	1	1
Anogam_AGAP004698-RA	0	0.084493	0.120644	OeCa F	Oe	Ca	1	1
Anogam_AGAP028436-RA	0	0.0987039	0.120644	OeCa F	Oe	Ca	1	1
Anogam_AGAP004704-RA	0	0.10319	0.120644	OeCa F	Oe	Ca	1	1
Anogam_AGAP028437-RA	0	0.0922233	0.120644	OeCa F	Oe	Ca	1	1
Anogam_AGAP004708-RA	0	0.084493	0.120644	OeCa F	Oe	Ca	1	1
Anogam_AGAP004710-RA	0	0.107677	0.120644	OeCa F	Oe	Ca	1	1
Anogam_AGAP004713-RA	0	0.108175	0.120644	OeCa F	Oe	Ca	1	1
Anogam_AGAP004719-RA	0	0.113161	0.120644	OeCa F	Oe	Ca	1	1
Anogam_AGAP004721-RA	0	0.106181	0.120644	OeCa F	Oe	Ca	1	1
Anogam_AGAP004722-RA	0	0.0972084	0.120644	OeCa F	Oe	Ca	1	1
Anogam_AGAP004726-RA	0	0.10319	0.120644	OeCa F	Oe	Ca	1	1
Anogam_AGAP004729-RA	0	0.103689	0.120644	OeCa F	Oe	Ca	1	1
Anogam_AGAP004731-RA	0	0.084493	0.120644	OeCa F	Oe	Ca	1	1
Anogam_AGAP029113-RA	0	0.102692	0.120644	OeCa F	Oe	Ca	1	1
Anogam_AGAP004735-RA	0	0.084493	0.120644	OeCa F	Oe	Ca	1	1
Anogam_AGAP004738-RA	0	0.0997009	0.120644	OeCa F	Oe	Ca	1	1
Anogam_AGAP004741-RA	0	0.0917248	0.120644	OeCa F	Oe	Ca	1	1
Anogam_AGAP004742-RA	0.292645	0.00894632	0.120644	OeCa F	Oe	Ca	0.57378	0.281135
Anogam_AGAP004742-RB	-0.292645	0.00894632	0.120644	OeCa F	Oe	Ca	0.42622	0.718865
Anogam_AGAP004745-RB	6.41442e-07	0.0987039	0.120644	OeCa F	Oe	Ca	6.41442e-07	0
Anogam_AGAP004747-RA	0	0.0877368	0.120644	OeCa F	Oe	Ca	1	1
Anogam_AGAP004748-RA	0	0.114158	0.120644	OeCa F	Oe	Ca	1	1
Anogam_AGAP004750-RA	0	0.084493	0.120644	OeCa F	Oe	Ca	1	1
Anogam_AGAP004753-RB	0	0.0922233	0.120644	OeCa F	Oe	Ca	0	0
Anogam_AGAP004753-RA	0	0.104686	0.120644	OeCa F	Oe	Ca	1	1
Anogam_AGAP004756-RA	0	0.102692	0.120644	OeCa F	Oe	Ca	1	1
Anogam_AGAP004758-RC	0.00374947	0.0745527	0.120644	OeCa F	Oe	Ca	0.0693925	0.065643
Anogam_AGAP004758-RA	0.00492569	0.0972084	0.120644	OeCa F	Oe	Ca	0.923724	0.918798
Anogam_AGAP004758-RB	-0.00867516	0.0962114	0.120644	OeCa F	Oe	Ca	0.00688353	0.0155587
Anogam_AGAP004760-RA	0	0.10319	0.120644	OeCa F	Oe	Ca	1	1
Anogam_AGAP004764-RA	0	0.084493	0.120644	OeCa F	Oe	Ca	1	1
Anogam_AGAP028129-RA	0	0.105683	0.120644	OeCa F	Oe	Ca	1	1
Anogam_AGAP004767-RA	0	0.0967099	0.120644	OeCa F	Oe	Ca	1	1
Anogam_AGAP004768-RA	0	0.0937188	0.120644	OeCa F	Oe	Ca	1	1
Anogam_AGAP004768-RB	0	0.0882353	0.120644	OeCa F	Oe	Ca	0	0
Anogam_AGAP004770-RA	0	0.0987039	0.120644	OeCa F	Oe	Ca	1	1
Anogam_AGAP004771-RA	0	0.084493	0.120644	OeCa F	Oe	Ca	1	1
Anogam_AGAP004772-RA	0	0.084493	0.120644	OeCa F	Oe	Ca	1	1
Anogam_AGAP004775-RB	-0.061146	0.0447316	0.120644	OeCa F	Oe	Ca	0.0914384	0.152584
Anogam_AGAP004775-RA	0.061146	0.0493519	0.120644	OeCa F	Oe	Ca	0.908562	0.847416
Anogam_AGAP004777-RA	0	0.084493	0.120644	OeCa F	Oe	Ca	1	1
Anogam_AGAP004780-RA	0	0.084493	0.120644	OeCa F	Oe	Ca	1	1
Anogam_AGAP004781-RA	0	0.084493	0.120644	OeCa F	Oe	Ca	1	1
Anogam_AGAP004782-RA	0	0.084493	0.120644	OeCa F	Oe	Ca	1	1
Anogam_AGAP004783-RA	0	0.107178	0.120644	OeCa F	Oe	Ca	1	1
Anogam_AGAP004787-RA	0	0.084493	0.120644	OeCa F	Oe	Ca	1	1
Anogam_AGAP004789-RA	0	0.084493	0.120644	OeCa F	Oe	Ca	1	1
Anogam_AGAP004795-RA	0	0.084493	0.120644	OeCa F	Oe	Ca	1	1
Anogam_AGAP004797-RA	0	0.105184	0.120644	OeCa F	Oe	Ca	1	1
Anogam_AGAP004798-RA	0	0.084493	0.120644	OeCa F	Oe	Ca	1	1
Anogam_AGAP004799-RA	0	0.0967099	0.120644	OeCa F	Oe	Ca	1	1
Anogam_AGAP004800-RA	0	0.113161	0.120644	OeCa F	Oe	Ca	1	1
Anogam_AGAP004808-RA	0	0.0952144	0.120644	OeCa F	Oe	Ca	1	1
Anogam_AGAP004809-RA	0	0.084493	0.120644	OeCa F	Oe	Ca	1	1
Anogam_AGAP004810-RA	0	0.0987039	0.120644	OeCa F	Oe	Ca	1	1
Anogam_AGAP004812-RA	0	0.0962114	0.120644	OeCa F	Oe	Ca	1	1
Anogam_AGAP004816-RA	0	0.0972084	0.120644	OeCa F	Oe	Ca	1	1
Anogam_AGAP004817-RA	0	0.116152	0.120644	OeCa F	Oe	Ca	1	1
Anogam_AGAP004819-RB	-0.0289516	0.0747757	0.120644	OeCa F	Oe	Ca	0.100739	0.12969
Anogam_AGAP004819-RA	0.036823	0.0692921	0.120644	OeCa F	Oe	Ca	0.0933965	0.0565735
Anogam_AGAP004819-RC	-0.00787137	0.0987039	0.120644	OeCa F	Oe	Ca	0.805865	0.813736
Anogam_AGAP004823-RA	0	0.109172	0.120644	OeCa F	Oe	Ca	1	1
Anogam_AGAP004826-RA	0	0.108175	0.120644	OeCa F	Oe	Ca	1	1
Anogam_AGAP004829-RA	0	0.117647	0.120644	OeCa F	Oe	Ca	1	1
Anogam_AGAP004830-RA	0	0.102692	0.120644	OeCa F	Oe	Ca	1	1
Anogam_AGAP004830-RB	0	0.105683	0.120644	OeCa F	Oe	Ca	0	0
Anogam_AGAP004832-RA	0	0.0967099	0.120644	OeCa F	Oe	Ca	1	1
Anogam_AGAP004834-RA	0.417936	0.00947159	0.120644	OeCa F	Oe	Ca	0.778448	0.360511
Anogam_AGAP004834-RB	-0.417936	0.00648056	0.120644	OeCa F	Oe	Ca	0.221552	0.639489
Anogam_AGAP004836-RA	0	0.103689	0.120644	OeCa F	Oe	Ca	1	1
Anogam_AGAP004837-RA	0	0.100199	0.120644	OeCa F	Oe	Ca	1	1
Anogam_AGAP004838-RA	0	0.109172	0.120644	OeCa F	Oe	Ca	1	1
Anogam_AGAP004840-RA	0	0.084493	0.120644	OeCa F	Oe	Ca	1	1
Anogam_AGAP004841-RA	0	0.10319	0.120644	OeCa F	Oe	Ca	1	1
Anogam_AGAP004844-RA	0	0.110668	0.120644	OeCa F	Oe	Ca	1	1
Anogam_AGAP004848-RA	0	0.084493	0.120644	OeCa F	Oe	Ca	1	1
Anogam_AGAP004850-RA	0	0.084493	0.120644	OeCa F	Oe	Ca	1	1
Anogam_AGAP004851-RA	0	0.10668	0.120644	OeCa F	Oe	Ca	1	1
Anogam_AGAP004852-RB	0.00755375	0.0907278	0.120644	OeCa F	Oe	Ca	0.444269	0.436715
Anogam_AGAP004852-RA	-0.00755375	0.0917248	0.120644	OeCa F	Oe	Ca	0.555731	0.563285
Anogam_AGAP004853-RA	0	0.115653	0.120644	OeCa F	Oe	Ca	1	1
Anogam_AGAP029106-RA	0	0.0967099	0.120644	OeCa F	Oe	Ca	1	1
Anogam_AGAP004859-RA	0	0.084493	0.120644	OeCa F	Oe	Ca	1	1
Anogam_AGAP004860-RA	0	0.084493	0.120644	OeCa F	Oe	Ca	1	1
Anogam_AGAP004861-RA	0	0.100698	0.120644	OeCa F	Oe	Ca	1	1
Anogam_AGAP004864-RA	0	0.103689	0.120644	OeCa F	Oe	Ca	1	1
Anogam_AGAP004865-RA	0	0.102692	0.120644	OeCa F	Oe	Ca	1	1
Anogam_AGAP004866-RA	0	0.084493	0.120644	OeCa F	Oe	Ca	1	1
Anogam_AGAP004868-RA	0	0.102692	0.120644	OeCa F	Oe	Ca	1	1
Anogam_AGAP004869-RA	0	0.084493	0.120644	OeCa F	Oe	Ca	1	1
Anogam_AGAP004872-RA	0	0.107677	0.120644	OeCa F	Oe	Ca	1	1
Anogam_AGAP004873-RA	0	0.0992024	0.120644	OeCa F	Oe	Ca	1	1
Anogam_AGAP004874-RA	0	0.084493	0.120644	OeCa F	Oe	Ca	1	1
Anogam_AGAP004875-RA	0	0.102193	0.120644	OeCa F	Oe	Ca	1	1
Anogam_AGAP004878-RA	0	0.084493	0.120644	OeCa F	Oe	Ca	1	1
Anogam_AGAP004882-RA	0	0.084493	0.120644	OeCa F	Oe	Ca	1	1
Anogam_AGAP004884-RA	0	0.084493	0.120644	OeCa F	Oe	Ca	1	1
Anogam_AGAP004886-RA	0.00338987	0.0892323	0.120644	OeCa F	Oe	Ca	0.04429	0.0409001
Anogam_AGAP004886-RB	-0.00338987	0.0755467	0.120644	OeCa F	Oe	Ca	0.95571	0.9591
Anogam_AGAP004887-RA	0	0.0997009	0.120644	OeCa F	Oe	Ca	1	1
Anogam_AGAP004889-RA	0	0.0982054	0.120644	OeCa F	Oe	Ca	1	1
Anogam_AGAP004891-RA	0	0.0972084	0.120644	OeCa F	Oe	Ca	1	1
Anogam_AGAP004893-RA	0	0.10319	0.120644	OeCa F	Oe	Ca	1	1
Anogam_AGAP004894-RA	0	0.0982054	0.120644	OeCa F	Oe	Ca	1	1
Anogam_AGAP004895-RA	0	0.105184	0.120644	OeCa F	Oe	Ca	1	1
Anogam_AGAP004896-RA	-0.333333	0.00598205	0.120644	OeCa F	Oe	Ca	0.666667	1
Anogam_AGAP004896-RB	0.333333	0.00797607	0.120644	OeCa F	Oe	Ca	0.333333	0
Anogam_AGAP028438-RA	0	0.084493	0.120644	OeCa F	Oe	Ca	1	1
Anogam_AGAP004900-RA	0	0.084493	0.120644	OeCa F	Oe	Ca	1	1
Anogam_AGAP004901-RA	0	0.084493	0.120644	OeCa F	Oe	Ca	1	1
Anogam_AGAP004908-RA	0	0.10668	0.120644	OeCa F	Oe	Ca	1	1
Anogam_AGAP004910-RA	0	0.102193	0.120644	OeCa F	Oe	Ca	1	1
Anogam_AGAP004911-RA	0	0.10319	0.120644	OeCa F	Oe	Ca	1	1
Anogam_AGAP004916-RA	0	0.112164	0.120644	OeCa F	Oe	Ca	1	1
Anogam_AGAP004917-RA	0	0.104187	0.120644	OeCa F	Oe	Ca	1	1
Anogam_AGAP004918-RA	0	0.084493	0.120644	OeCa F	Oe	Ca	1	1
Anogam_AGAP028439-RA	0	0.0992024	0.120644	OeCa F	Oe	Ca	1	1
Anogam_AGAP004921-RA	0	0.0952144	0.120644	OeCa F	Oe	Ca	1	1
Anogam_AGAP004923-RA	0	0.106181	0.120644	OeCa F	Oe	Ca	1	1
Anogam_AGAP004924-RA	0	0.105683	0.120644	OeCa F	Oe	Ca	1	1
Anogam_AGAP004928-RA	0	0.084493	0.120644	OeCa F	Oe	Ca	1	1
Anogam_AGAP004933-RA	0	0.0872383	0.120644	OeCa F	Oe	Ca	1	1
Anogam_AGAP004934-RA	0	0.0907278	0.120644	OeCa F	Oe	Ca	1	1
Anogam_AGAP004937-RA	0	0.104187	0.120644	OeCa F	Oe	Ca	1	1
Anogam_AGAP004938-RA	0	0.0907278	0.120644	OeCa F	Oe	Ca	1	1
Anogam_AGAP004942-RA	0	0.112164	0.120644	OeCa F	Oe	Ca	1	1
Anogam_AGAP004944-RA	0	0.0897308	0.120644	OeCa F	Oe	Ca	1	1
Anogam_AGAP004945-RA	0	0.10319	0.120644	OeCa F	Oe	Ca	1	1
Anogam_AGAP004946-RA	0	0.084493	0.120644	OeCa F	Oe	Ca	1	1
Anogam_AGAP004948-RA	0	0.111167	0.120644	OeCa F	Oe	Ca	1	1
Anogam_AGAP004953-RA	0	0.084493	0.120644	OeCa F	Oe	Ca	1	1
Anogam_AGAP004954-RA	0	0.101196	0.120644	OeCa F	Oe	Ca	1	1
Anogam_AGAP004956-RA	0	0.0952144	0.120644	OeCa F	Oe	Ca	1	1
Anogam_AGAP004958-RA	0	0.10319	0.120644	OeCa F	Oe	Ca	1	1
Anogam_AGAP004962-RA	0	0.111167	0.120644	OeCa F	Oe	Ca	1	1
Anogam_AGAP004964-RA	0	0.0977069	0.120644	OeCa F	Oe	Ca	1	1
Anogam_AGAP004968-RA	0	0.0947159	0.120644	OeCa F	Oe	Ca	1	1
Anogam_AGAP004972-RA	0	0.105184	0.120644	OeCa F	Oe	Ca	1	1
Anogam_AGAP004975-RA	0	0.084493	0.120644	OeCa F	Oe	Ca	1	1
Anogam_AGAP004976-RA	0	0.101196	0.120644	OeCa F	Oe	Ca	1	1
Anogam_AGAP004977-RA	0	0.0927218	0.120644	OeCa F	Oe	Ca	1	1
Anogam_AGAP004978-RA	0	0.084493	0.120644	OeCa F	Oe	Ca	1	1
Anogam_AGAP004980-RA	0	0.084493	0.120644	OeCa F	Oe	Ca	1	1
Anogam_AGAP004981-RA	0	0.117647	0.120644	OeCa F	Oe	Ca	1	1
Anogam_AGAP004982-RA	0	0.0997009	0.120644	OeCa F	Oe	Ca	1	1
Anogam_AGAP004983-RA	0	0.084493	0.120644	OeCa F	Oe	Ca	1	1
Anogam_AGAP004985-RA	0	0.084493	0.120644	OeCa F	Oe	Ca	1	1
Anogam_AGAP004989-RA	0	0.10319	0.120644	OeCa F	Oe	Ca	1	1
Anogam_AGAP004989-RB	0	0.101196	0.120644	OeCa F	Oe	Ca	0	0
Anogam_AGAP004991-RA	0	0.0942173	0.120644	OeCa F	Oe	Ca	1	1
Anogam_AGAP004994-RA	0	0.117149	0.120644	OeCa F	Oe	Ca	1	1
Anogam_AGAP004995-RA	0	0.106181	0.120644	OeCa F	Oe	Ca	1	1
Anogam_AGAP004996-RA	0	0.105184	0.120644	OeCa F	Oe	Ca	1	1
Anogam_AGAP005002-RA	0.236064	0.0154536	0.120644	OeCa F	Oe	Ca	0.736064	0.5
Anogam_AGAP005002-RB	-0.236064	0.0159521	0.120644	OeCa F	Oe	Ca	0.263936	0.5
Anogam_AGAP005003-RA	0	0.0987039	0.120644	OeCa F	Oe	Ca	1	1
Anogam_AGAP005007-RA	0	0.115653	0.120644	OeCa F	Oe	Ca	1	1
Anogam_AGAP005008-RA	0.120218	0.026839	0.120644	OeCa F	Oe	Ca	0.820009	0.699791
Anogam_AGAP005008-RB	-0.120218	0.0244267	0.120644	OeCa F	Oe	Ca	0.179991	0.300209
Anogam_AGAP005013-RA	0	0.115653	0.120644	OeCa F	Oe	Ca	1	1
Anogam_AGAP005015-RA	0	0.084493	0.120644	OeCa F	Oe	Ca	1	1
Anogam_AGAP005018-RA	0	0.084493	0.120644	OeCa F	Oe	Ca	1	1
Anogam_AGAP005020-RA	0	0.084493	0.120644	OeCa F	Oe	Ca	1	1
Anogam_AGAP005021-RA	0	0.084493	0.120644	OeCa F	Oe	Ca	1	1
Anogam_AGAP005023-RA	0	0.105683	0.120644	OeCa F	Oe	Ca	1	1
Anogam_AGAP005025-RA	0	0.084493	0.120644	OeCa F	Oe	Ca	1	1
Anogam_AGAP005027-RA	0	0.117149	0.120644	OeCa F	Oe	Ca	1	1
Anogam_AGAP005030-RA	0	0.104187	0.120644	OeCa F	Oe	Ca	1	1
Anogam_AGAP005031-RA	0.0236369	0.0702891	0.120644	OeCa F	Oe	Ca	0.994976	0.97134
Anogam_AGAP005031-RB	-0.0236369	0.0667996	0.120644	OeCa F	Oe	Ca	0.00502359	0.0286605
Anogam_AGAP005033-RA	0	0.084493	0.120644	OeCa F	Oe	Ca	1	1
Anogam_AGAP005034-RA	0	0.084493	0.120644	OeCa F	Oe	Ca	1	1
Anogam_AGAP005035-RA	0	0.0887338	0.120644	OeCa F	Oe	Ca	1	1
Anogam_AGAP005036-RA	0	0.084493	0.120644	OeCa F	Oe	Ca	1	1
Anogam_AGAP005037-RA	-0.0722298	0.0397614	0.120644	OeCa F	Oe	Ca	0.0162901	0.0885199
Anogam_AGAP005037-RB	0.0722298	0.0418744	0.120644	OeCa F	Oe	Ca	0.98371	0.91148
Anogam_AGAP005039-RA	0	0.107677	0.120644	OeCa F	Oe	Ca	1	1
Anogam_AGAP005040-RA	0	0.0912263	0.120644	OeCa F	Oe	Ca	1	1
Anogam_AGAP005041-RA	0	0.084493	0.120644	OeCa F	Oe	Ca	1	1
Anogam_AGAP005043-RA	0.0955659	0.0408774	0.120644	OeCa F	Oe	Ca	0.0955659	0
Anogam_AGAP005043-RB	-0.0955659	0.0408774	0.120644	OeCa F	Oe	Ca	0.904434	1
Anogam_AGAP005044-RB	0.0493202	0.05334	0.120644	OeCa F	Oe	Ca	0.155527	0.106206
Anogam_AGAP005044-RA	-0.0493202	0.056331	0.120644	OeCa F	Oe	Ca	0.844473	0.893794
Anogam_AGAP005047-RA	0	0.114158	0.120644	OeCa F	Oe	Ca	1	1
Anogam_AGAP005049-RA	0	0.105683	0.120644	OeCa F	Oe	Ca	1	1
Anogam_AGAP005051-RA	0	0.100199	0.120644	OeCa F	Oe	Ca	1	1
Anogam_AGAP005053-RA	0	0.0917248	0.120644	OeCa F	Oe	Ca	1	1
Anogam_AGAP005054-RA	-0.0543642	0.055334	0.120644	OeCa F	Oe	Ca	0.680396	0.73476
Anogam_AGAP005054-RB	0.0543642	0.0538385	0.120644	OeCa F	Oe	Ca	0.319604	0.26524
Anogam_AGAP005056-RA	0	0.084493	0.120644	OeCa F	Oe	Ca	1	1
Anogam_AGAP005060-RA	0	0.100698	0.120644	OeCa F	Oe	Ca	1	1
Anogam_AGAP005063-RA	0	0.0927218	0.120644	OeCa F	Oe	Ca	1	1
Anogam_AGAP005068-RA	0	0.0987039	0.120644	OeCa F	Oe	Ca	1	1
Anogam_AGAP005070-RA	0	0.102692	0.120644	OeCa F	Oe	Ca	1	1
Anogam_AGAP005071-RB	0.00659601	0.0782652	0.120644	OeCa F	Oe	Ca	0.0900636	0.0834676
Anogam_AGAP005071-RA	-0.00659601	0.103689	0.120644	OeCa F	Oe	Ca	0.909936	0.916532
Anogam_AGAP005072-RA	0	0.108674	0.120644	OeCa F	Oe	Ca	1	1
Anogam_AGAP005080-RA	0	0.0967099	0.120644	OeCa F	Oe	Ca	1	1
Anogam_AGAP005092-RA	0	0.084493	0.120644	OeCa F	Oe	Ca	1	1
Anogam_AGAP005101-RA	0	0.113161	0.120644	OeCa F	Oe	Ca	1	1
Anogam_AGAP005102-RA	0	0.084493	0.120644	OeCa F	Oe	Ca	1	1
Anogam_AGAP005103-RA	0	0.084493	0.120644	OeCa F	Oe	Ca	1	1
Anogam_AGAP028443-RA	0	0.108175	0.120644	OeCa F	Oe	Ca	1	1
Anogam_AGAP005107-RA	0	0.0927218	0.120644	OeCa F	Oe	Ca	1	1
Anogam_AGAP028444-RA	0	0.084493	0.120644	OeCa F	Oe	Ca	1	1
Anogam_AGAP005109-RA	0	0.101196	0.120644	OeCa F	Oe	Ca	1	1
Anogam_AGAP005113-RA	0	0.0957129	0.120644	OeCa F	Oe	Ca	1	1
Anogam_AGAP005114-RB	0.0320382	0.0722832	0.120644	OeCa F	Oe	Ca	0.741938	0.7099
Anogam_AGAP005114-RA	-0.0320382	0.0787637	0.120644	OeCa F	Oe	Ca	0.258062	0.2901
Anogam_AGAP005115-RA	0	0.107178	0.120644	OeCa F	Oe	Ca	1	1
Anogam_AGAP005117-RA	0	0.0937188	0.120644	OeCa F	Oe	Ca	1	1
Anogam_AGAP005119-RA	0	0.084493	0.120644	OeCa F	Oe	Ca	1	1
Anogam_AGAP005120-RA	0	0.0877368	0.120644	OeCa F	Oe	Ca	1	1
Anogam_AGAP005122-RA	0	0.0977069	0.120644	OeCa F	Oe	Ca	1	1
Anogam_AGAP005123-RA	0	0.111167	0.120644	OeCa F	Oe	Ca	1	1
Anogam_AGAP005124-RA	0.196688	0.0159521	0.120644	OeCa F	Oe	Ca	0.392162	0.195474
Anogam_AGAP005124-RB	-0.117298	0.0333998	0.120644	OeCa F	Oe	Ca	0.442663	0.559961
Anogam_AGAP005124-RC	-0.0793896	0.0468594	0.120644	OeCa F	Oe	Ca	0.165175	0.244565
Anogam_AGAP005125-RA	0	0.101695	0.120644	OeCa F	Oe	Ca	1	1
Anogam_AGAP005126-RA	0	0.0932203	0.120644	OeCa F	Oe	Ca	1	1
Anogam_AGAP005129-RA	0	0.084493	0.120644	OeCa F	Oe	Ca	1	1
Anogam_AGAP005131-RA	0	0.112662	0.120644	OeCa F	Oe	Ca	1	1
Anogam_AGAP005133-RA	0	0.084493	0.120644	OeCa F	Oe	Ca	1	1
Anogam_AGAP005135-RA	0	0.084493	0.120644	OeCa F	Oe	Ca	1	1
Anogam_AGAP005138-RA	0	0.107677	0.120644	OeCa F	Oe	Ca	1	1
Anogam_AGAP005139-RA	0	0.105184	0.120644	OeCa F	Oe	Ca	1	1
Anogam_AGAP005143-RA	0	0.0982054	0.120644	OeCa F	Oe	Ca	1	1
Anogam_AGAP005147-RB	-0.122279	0.0314058	0.120644	OeCa F	Oe	Ca	0.189167	0.311446
Anogam_AGAP005147-RA	0.122279	0.0264207	0.120644	OeCa F	Oe	Ca	0.810833	0.688554
Anogam_AGAP005149-RA	0	0.113659	0.120644	OeCa F	Oe	Ca	1	1
Anogam_AGAP005150-RA	0	0.115155	0.120644	OeCa F	Oe	Ca	1	1
Anogam_AGAP005156-RA	0	0.117647	0.120644	OeCa F	Oe	Ca	1	1
Anogam_AGAP005158-RA	0	0.100199	0.120644	OeCa F	Oe	Ca	1	1
Anogam_AGAP005159-RA	0	0.111665	0.120644	OeCa F	Oe	Ca	1	1
Anogam_AGAP005160-RD	0.0395558	0.0618146	0.120644	OeCa F	Oe	Ca	0.157436	0.11788
Anogam_AGAP005160-RE	0.0309318	0.055666	0.120644	OeCa F	Oe	Ca	0.606575	0.575643
Anogam_AGAP005160-RB	-0.00247868	0.0775348	0.120644	OeCa F	Oe	Ca	0.094492	0.0969707
Anogam_AGAP005160-RA	0.0266739	0.0628116	0.120644	OeCa F	Oe	Ca	0.0420838	0.0154098
Anogam_AGAP005160-RC	-0.0946828	0.0358923	0.120644	OeCa F	Oe	Ca	0.0994134	0.194096
Anogam_AGAP005162-RA	0.0252712	0.0747757	0.120644	OeCa F	Oe	Ca	0.367035	0.341764
Anogam_AGAP005162-RB	-0.0252712	0.0576541	0.120644	OeCa F	Oe	Ca	0.632965	0.658236
Anogam_AGAP005164-RA	0	0.117647	0.120644	OeCa F	Oe	Ca	1	1
Anogam_AGAP005165-RA	0	0.101695	0.120644	OeCa F	Oe	Ca	1	1
Anogam_AGAP005170-RA	0	0.0967099	0.120644	OeCa F	Oe	Ca	1	1
Anogam_AGAP005171-RA	0	0.084493	0.120644	OeCa F	Oe	Ca	1	1
Anogam_AGAP005173-RA	0	0.102193	0.120644	OeCa F	Oe	Ca	1	1
Anogam_AGAP005174-RA	0	0.104686	0.120644	OeCa F	Oe	Ca	1	1
Anogam_AGAP005178-RA	0	0.105683	0.120644	OeCa F	Oe	Ca	1	1
Anogam_AGAP005180-RA	0	0.0908544	0.120644	OeCa F	Oe	Ca	1	1
Anogam_AGAP005181-RA	0	0.0952144	0.120644	OeCa F	Oe	Ca	1	1
Anogam_AGAP005183-RA	0	0.0902293	0.120644	OeCa F	Oe	Ca	1	1
Anogam_AGAP005189-RA	0	0.0952144	0.120644	OeCa F	Oe	Ca	1	1
Anogam_AGAP005190-RA	0	0.084493	0.120644	OeCa F	Oe	Ca	1	1
Anogam_AGAP005192-RA	0	0.100698	0.120644	OeCa F	Oe	Ca	1	1
Anogam_AGAP005194-RA	0	0.108175	0.120644	OeCa F	Oe	Ca	1	1
Anogam_AGAP005195-RA	0	0.0907278	0.120644	OeCa F	Oe	Ca	1	1
Anogam_AGAP005196-RA	0	0.105184	0.120644	OeCa F	Oe	Ca	1	1
Anogam_AGAP005197-RA	0	0.108674	0.120644	OeCa F	Oe	Ca	1	1
Anogam_AGAP005199-RA	0.100839	0.0338983	0.120644	OeCa F	Oe	Ca	0.906151	0.805312
Anogam_AGAP005199-RB	-0.100839	0.0398804	0.120644	OeCa F	Oe	Ca	0.0938487	0.194688
Anogam_AGAP005201-RA	0	0.112164	0.120644	OeCa F	Oe	Ca	1	1
Anogam_AGAP005203-RC	-0.0483852	0.050349	0.120644	OeCa F	Oe	Ca	0.182159	0.230544
Anogam_AGAP005203-RJ	-0.00350322	0.0755467	0.120644	OeCa F	Oe	Ca	0.00995795	0.0134612
Anogam_AGAP005203-RD	-0.152138	0.0209372	0.120644	OeCa F	Oe	Ca	0.124502	0.27664
Anogam_AGAP005203-RH	0	0.0942173	0.120644	OeCa F	Oe	Ca	0	0
Anogam_AGAP005203-RE	0	0.084493	0.120644	OeCa F	Oe	Ca	0	0
Anogam_AGAP005203-RF	-0.0445221	0.0478564	0.120644	OeCa F	Oe	Ca	0.169181	0.213703
Anogam_AGAP005203-RA	0.248548	0.0124626	0.120644	OeCa F	Oe	Ca	0.514201	0.265652
Anogam_AGAP005203-RB	0	0.0957129	0.120644	OeCa F	Oe	Ca	0	0
Anogam_AGAP005205-RC	-0.0135301	0.0962114	0.120644	OeCa F	Oe	Ca	0.0508539	0.064384
Anogam_AGAP005205-RB	0.10368	0.0383848	0.120644	OeCa F	Oe	Ca	0.549291	0.445611
Anogam_AGAP005205-RA	-0.0901504	0.0423729	0.120644	OeCa F	Oe	Ca	0.399855	0.490005
Anogam_AGAP005207-RA	0	0.117149	0.120644	OeCa F	Oe	Ca	1	1
Anogam_AGAP005209-RA	0	0.0907278	0.120644	OeCa F	Oe	Ca	1	1
Anogam_AGAP005211-RA	0	0.0962114	0.120644	OeCa F	Oe	Ca	1	1
Anogam_AGAP005213-RA	0.198109	0.0184447	0.120644	OeCa F	Oe	Ca	0.697487	0.499378
Anogam_AGAP005213-RD	-0.21092	0.0134596	0.120644	OeCa F	Oe	Ca	0.239039	0.449959
Anogam_AGAP005213-RF	0	0.109671	0.120644	OeCa F	Oe	Ca	0	0
Anogam_AGAP005213-RB	0.0128109	0.0862413	0.120644	OeCa F	Oe	Ca	0.0634744	0.0506635
Anogam_AGAP005215-RA	0	0.0997009	0.120644	OeCa F	Oe	Ca	1	1
Anogam_AGAP005217-RA	0	0.10319	0.120644	OeCa F	Oe	Ca	1	1
Anogam_AGAP005218-RA	0	0.114158	0.120644	OeCa F	Oe	Ca	1	1
Anogam_AGAP005220-RA	0	0.113161	0.120644	OeCa F	Oe	Ca	1	1
Anogam_AGAP005225-RA	0	0.101196	0.120644	OeCa F	Oe	Ca	1	1
Anogam_AGAP005226-RA	0	0.084493	0.120644	OeCa F	Oe	Ca	1	1
Anogam_AGAP013141-RA	0	0.084493	0.120644	OeCa F	Oe	Ca	1	1
Anogam_AGAP005228-RA	0	0.084493	0.120644	OeCa F	Oe	Ca	1	1
Anogam_AGAP005229-RA	0	0.10319	0.120644	OeCa F	Oe	Ca	1	1
Anogam_AGAP005230-RA	0	0.103689	0.120644	OeCa F	Oe	Ca	1	1
Anogam_AGAP005231-RA	0	0.084493	0.120644	OeCa F	Oe	Ca	1	1
Anogam_AGAP005233-RA	0	0.084493	0.120644	OeCa F	Oe	Ca	1	1
Anogam_AGAP005234-RA	0.0404584	0.0516899	0.120644	OeCa F	Oe	Ca	0.398935	0.358477
Anogam_AGAP005234-RB	-0.0404584	0.0658026	0.120644	OeCa F	Oe	Ca	0.601065	0.641523
Anogam_AGAP005235-RA	0	0.0952144	0.120644	OeCa F	Oe	Ca	1	1
Anogam_AGAP005236-RA	0	0.084493	0.120644	OeCa F	Oe	Ca	1	1
Anogam_AGAP005239-RA	0	0.108175	0.120644	OeCa F	Oe	Ca	1	1
Anogam_AGAP005243-RA	0	0.106181	0.120644	OeCa F	Oe	Ca	1	1
Anogam_AGAP005244-RB	-0.277014	0.00894632	0.120644	OeCa F	Oe	Ca	0.505837	0.78285
Anogam_AGAP005244-RA	0.277014	0.0159521	0.120644	OeCa F	Oe	Ca	0.494163	0.21715
Anogam_AGAP005246-RE	-0.00540467	0.0892323	0.120644	OeCa F	Oe	Ca	0.359584	0.364989
Anogam_AGAP005246-RC	-0.0251179	0.0697906	0.120644	OeCa F	Oe	Ca	0.0796145	0.104732
Anogam_AGAP005246-RD	0.0521543	0.0538385	0.120644	OeCa F	Oe	Ca	0.466238	0.414084
Anogam_AGAP005246-RA	-0.0216317	0.0606362	0.120644	OeCa F	Oe	Ca	0.0945634	0.116195
Anogam_AGAP005249-RA	0	0.0987039	0.120644	OeCa F	Oe	Ca	1	1
Anogam_AGAP005252-RA	0	0.107677	0.120644	OeCa F	Oe	Ca	1	1
Anogam_AGAP005254-RA	-0.5	0.000994036	0.120644	OeCa F	Oe	Ca	0	0.5
Anogam_AGAP005254-RB	0.5	0.00448654	0.120644	OeCa F	Oe	Ca	1	0.5
Anogam_AGAP005255-RA	0	0.106181	0.120644	OeCa F	Oe	Ca	1	1
Anogam_AGAP005256-RA	0	0.104187	0.120644	OeCa F	Oe	Ca	1	1
Anogam_AGAP005259-RA	0	0.107677	0.120644	OeCa F	Oe	Ca	1	1
Anogam_AGAP005260-RA	0	0.10668	0.120644	OeCa F	Oe	Ca	1	1
Anogam_AGAP005262-RA	0	0.0982054	0.120644	OeCa F	Oe	Ca	1	1
Anogam_AGAP005264-RA	0	0.0997009	0.120644	OeCa F	Oe	Ca	1	1
Anogam_AGAP005265-RA	0	0.084493	0.120644	OeCa F	Oe	Ca	1	1
Anogam_AGAP005269-RA	0	0.0892323	0.120644	OeCa F	Oe	Ca	1	1
Anogam_AGAP005270-RA	0	0.0892323	0.120644	OeCa F	Oe	Ca	1	1
Anogam_AGAP005274-RA	0	0.105683	0.120644	OeCa F	Oe	Ca	1	1
Anogam_AGAP005281-RA	0	0.107178	0.120644	OeCa F	Oe	Ca	1	1
Anogam_AGAP005287-RA	0	0.101695	0.120644	OeCa F	Oe	Ca	1	1
Anogam_AGAP005290-RA	0	0.104187	0.120644	OeCa F	Oe	Ca	1	1
Anogam_AGAP005292-RA	0	0.106181	0.120644	OeCa F	Oe	Ca	1	1
Anogam_AGAP005295-RA	0	0.084493	0.120644	OeCa F	Oe	Ca	1	1
Anogam_AGAP005298-RA	0	0.10319	0.120644	OeCa F	Oe	Ca	1	1
Anogam_AGAP005300-RC	0.041967	0.0643071	0.120644	OeCa F	Oe	Ca	0.131999	0.0900321
Anogam_AGAP005300-RA	-0.0293577	0.0727817	0.120644	OeCa F	Oe	Ca	0.149459	0.178816
Anogam_AGAP005300-RB	-0.0126094	0.0817547	0.120644	OeCa F	Oe	Ca	0.718542	0.731152
Anogam_AGAP005301-RA	0	0.117149	0.120644	OeCa F	Oe	Ca	1	1
Anogam_AGAP005306-RA	0	0.102193	0.120644	OeCa F	Oe	Ca	1	1
Anogam_AGAP005308-RA	0	0.084493	0.120644	OeCa F	Oe	Ca	1	1
Anogam_AGAP005312-RA	0	0.084493	0.120644	OeCa F	Oe	Ca	1	1
Anogam_AGAP005314-RA	0	0.100698	0.120644	OeCa F	Oe	Ca	1	1
Anogam_AGAP005315-RA	0	0.109172	0.120644	OeCa F	Oe	Ca	1	1
Anogam_AGAP005316-RA	0	0.084493	0.120644	OeCa F	Oe	Ca	1	1
Anogam_AGAP005317-RA	0	0.10319	0.120644	OeCa F	Oe	Ca	1	1
Anogam_AGAP005318-RA	0	0.102692	0.120644	OeCa F	Oe	Ca	1	1
Anogam_AGAP005321-RA	0	0.101695	0.120644	OeCa F	Oe	Ca	1	1
Anogam_AGAP005330-RA	0	0.11665	0.120644	OeCa F	Oe	Ca	1	1
Anogam_AGAP005331-RA	0	0.0977069	0.120644	OeCa F	Oe	Ca	1	1
Anogam_AGAP005335-RA	0	0.100698	0.120644	OeCa F	Oe	Ca	1	1
Anogam_AGAP005337-RA	0	0.107178	0.120644	OeCa F	Oe	Ca	1	1
Anogam_AGAP005338-RA	0	0.0872383	0.120644	OeCa F	Oe	Ca	1	1
Anogam_AGAP005339-RA	0	0.108175	0.120644	OeCa F	Oe	Ca	1	1
Anogam_AGAP005340-RA	0	0.103689	0.120644	OeCa F	Oe	Ca	1	1
Anogam_AGAP005341-RB	0.0323013	0.0663011	0.120644	OeCa F	Oe	Ca	0.114485	0.0821839
Anogam_AGAP005341-RA	-0.0323013	0.0658026	0.120644	OeCa F	Oe	Ca	0.885515	0.917816
Anogam_AGAP005342-RA	0	0.10668	0.120644	OeCa F	Oe	Ca	1	1
Anogam_AGAP005343-RA	0	0.084493	0.120644	OeCa F	Oe	Ca	1	1
Anogam_AGAP005347-RA	0	0.0997009	0.120644	OeCa F	Oe	Ca	1	1
Anogam_AGAP005348-RA	0	0.084493	0.120644	OeCa F	Oe	Ca	1	1
Anogam_AGAP005351-RA	0	0.115155	0.120644	OeCa F	Oe	Ca	1	1
Anogam_AGAP005353-RA	0	0.102692	0.120644	OeCa F	Oe	Ca	1	1
Anogam_AGAP005362-RA	0	0.101695	0.120644	OeCa F	Oe	Ca	1	1
Anogam_AGAP005363-RA	0	0.0927218	0.120644	OeCa F	Oe	Ca	1	1
Anogam_AGAP005365-RA	0	0.105683	0.120644	OeCa F	Oe	Ca	1	1
Anogam_AGAP005369-RA	0.0152363	0.0762712	0.120644	OeCa F	Oe	Ca	0.207314	0.192078
Anogam_AGAP005369-RB	-0.0152363	0.0656064	0.120644	OeCa F	Oe	Ca	0.792686	0.807922
Anogam_AGAP005370-RA	0	0.084493	0.120644	OeCa F	Oe	Ca	1	1
Anogam_AGAP005371-RA	0	0.084493	0.120644	OeCa F	Oe	Ca	1	1
Anogam_AGAP005372-RA	0	0.084493	0.120644	OeCa F	Oe	Ca	1	1
Anogam_AGAP005373-RA	0	0.084493	0.120644	OeCa F	Oe	Ca	1	1
Anogam_AGAP005376-RA	0	0.084493	0.120644	OeCa F	Oe	Ca	1	1
Anogam_AGAP005378-RA	0.210669	0.0129225	0.120644	OeCa F	Oe	Ca	0.947221	0.736552
Anogam_AGAP005378-RB	-0.202803	0.0129225	0.120644	OeCa F	Oe	Ca	0.0527792	0.255582
Anogam_AGAP005378-RC	-0.00786609	0.0877368	0.120644	OeCa F	Oe	Ca	0	0.00786609
Anogam_AGAP005381-RA	-0.00975797	0.0927218	0.120644	OeCa F	Oe	Ca	0.17032	0.180078
Anogam_AGAP005381-RB	0.0606898	0.0588235	0.120644	OeCa F	Oe	Ca	0.368382	0.307692
Anogam_AGAP005381-RC	-0.0509318	0.0467197	0.120644	OeCa F	Oe	Ca	0.461298	0.51223
Anogam_AGAP005383-RA	0	0.104686	0.120644	OeCa F	Oe	Ca	1	1
Anogam_AGAP005387-RA	0	0.106181	0.120644	OeCa F	Oe	Ca	1	1
Anogam_AGAP005388-RA	0	0.084493	0.120644	OeCa F	Oe	Ca	1	1
Anogam_AGAP005389-RA	0	0.0917248	0.120644	OeCa F	Oe	Ca	1	1
Anogam_AGAP005390-RA	0.600905	0.00249252	0.120644	OeCa F	Oe	Ca	1	0.399095
Anogam_AGAP005390-RB	-0.600905	0.00398804	0.120644	OeCa F	Oe	Ca	0	0.600905
Anogam_AGAP005394-RA	0	0.105683	0.120644	OeCa F	Oe	Ca	1	1
Anogam_AGAP005401-RA	0	0.084493	0.120644	OeCa F	Oe	Ca	1	1
Anogam_AGAP005403-RA	0	0.110668	0.120644	OeCa F	Oe	Ca	1	1
Anogam_AGAP005404-RA	0	0.0877368	0.120644	OeCa F	Oe	Ca	1	1
Anogam_AGAP005405-RA	0	0.0882353	0.120644	OeCa F	Oe	Ca	1	1
Anogam_AGAP005406-RA	0	0.0997009	0.120644	OeCa F	Oe	Ca	1	1
Anogam_AGAP005408-RA	0	0.0912263	0.120644	OeCa F	Oe	Ca	1	1
Anogam_AGAP005409-RA	0	0.084493	0.120644	OeCa F	Oe	Ca	1	1
Anogam_AGAP005411-RB	0.0965161	0.0347913	0.120644	OeCa F	Oe	Ca	0.318785	0.222268
Anogam_AGAP005411-RA	-0.0965161	0.0428714	0.120644	OeCa F	Oe	Ca	0.681215	0.777732
Anogam_AGAP005414-RA	0	0.084493	0.120644	OeCa F	Oe	Ca	1	1
Anogam_AGAP005418-RA	0	0.084493	0.120644	OeCa F	Oe	Ca	1	1
Anogam_AGAP005420-RA	0	0.100199	0.120644	OeCa F	Oe	Ca	1	1
Anogam_AGAP005422-RA	0	0.0942173	0.120644	OeCa F	Oe	Ca	1	1
Anogam_AGAP005424-RA	0	0.10319	0.120644	OeCa F	Oe	Ca	1	1
Anogam_AGAP013197-RA	0	0.117149	0.120644	OeCa F	Oe	Ca	1	1
Anogam_AGAP005425-RA	0	0.0932203	0.120644	OeCa F	Oe	Ca	1	1
Anogam_AGAP005428-RA	0	0.0927218	0.120644	OeCa F	Oe	Ca	1	1
Anogam_AGAP005430-RA	0	0.084493	0.120644	OeCa F	Oe	Ca	1	1
Anogam_AGAP005432-RA	0	0.084493	0.120644	OeCa F	Oe	Ca	1	1
Anogam_AGAP005434-RA	0	0.084493	0.120644	OeCa F	Oe	Ca	1	1
Anogam_AGAP028445-RA	0	0.084493	0.120644	OeCa F	Oe	Ca	1	1
Anogam_AGAP005437-RA	0	0.0932203	0.120644	OeCa F	Oe	Ca	1	1
Anogam_AGAP005440-RA	0	0.084493	0.120644	OeCa F	Oe	Ca	1	1
Anogam_AGAP005444-RA	0	0.0997009	0.120644	OeCa F	Oe	Ca	1	1
Anogam_AGAP005445-RA	0	0.100698	0.120644	OeCa F	Oe	Ca	1	1
Anogam_AGAP005448-RA	0	0.113659	0.120644	OeCa F	Oe	Ca	1	1
Anogam_AGAP005449-RA	0.147314	0.0254237	0.120644	OeCa F	Oe	Ca	0.360751	0.213437
Anogam_AGAP005449-RB	-0.147314	0.0259222	0.120644	OeCa F	Oe	Ca	0.639249	0.786563
Anogam_AGAP005450-RA	0	0.11665	0.120644	OeCa F	Oe	Ca	1	1
Anogam_AGAP028446-RA	0	0.0972084	0.120644	OeCa F	Oe	Ca	1	1
Anogam_AGAP005461-RA	0	0.116152	0.120644	OeCa F	Oe	Ca	1	1
Anogam_AGAP005472-RA	0	0.084493	0.120644	OeCa F	Oe	Ca	1	1
Anogam_AGAP005475-RA	0	0.102193	0.120644	OeCa F	Oe	Ca	1	1
Anogam_AGAP005476-RA	0	0.0922233	0.120644	OeCa F	Oe	Ca	1	1
Anogam_AGAP005477-RA	0	0.0952144	0.120644	OeCa F	Oe	Ca	1	1
Anogam_AGAP005478-RA	0	0.0942173	0.120644	OeCa F	Oe	Ca	1	1
Anogam_AGAP005483-RA	0	0.084493	0.120644	OeCa F	Oe	Ca	1	1
Anogam_AGAP005484-RA	0	0.114656	0.120644	OeCa F	Oe	Ca	1	1
Anogam_AGAP005486-RA	0	0.101695	0.120644	OeCa F	Oe	Ca	1	1
Anogam_AGAP005487-RA	0	0.084493	0.120644	OeCa F	Oe	Ca	1	1
Anogam_AGAP005490-RA	0	0.084493	0.120644	OeCa F	Oe	Ca	1	1
Anogam_AGAP005494-RA	0	0.0962114	0.120644	OeCa F	Oe	Ca	1	1
Anogam_AGAP005498-RB	0.0772916	0.0397614	0.120644	OeCa F	Oe	Ca	0.543953	0.466661
Anogam_AGAP005498-RC	-0.126857	0.0304088	0.120644	OeCa F	Oe	Ca	0.314511	0.441368
Anogam_AGAP005498-RA	0.0495658	0.0518445	0.120644	OeCa F	Oe	Ca	0.141537	0.0919708
Anogam_AGAP005499-RA	0	0.0877368	0.120644	OeCa F	Oe	Ca	1	1
Anogam_AGAP005504-RA	0.0280002	0.0663011	0.120644	OeCa F	Oe	Ca	0.0384198	0.0104196
Anogam_AGAP005504-RB	-0.0562365	0.0558325	0.120644	OeCa F	Oe	Ca	0.474945	0.531182
Anogam_AGAP005504-RD	0.0174858	0.0827517	0.120644	OeCa F	Oe	Ca	0.324357	0.306871
Anogam_AGAP005504-RC	0.0107506	0.0907278	0.120644	OeCa F	Oe	Ca	0.162278	0.151528
Anogam_AGAP005505-RA	0	0.107677	0.120644	OeCa F	Oe	Ca	1	1
Anogam_AGAP029078-RA	0	0.0942173	0.120644	OeCa F	Oe	Ca	1	1
Anogam_AGAP005508-RA	-0.0604231	0.054337	0.120644	OeCa F	Oe	Ca	0.494478	0.554901
Anogam_AGAP005508-RC	0.0604231	0.0447316	0.120644	OeCa F	Oe	Ca	0.505522	0.445099
Anogam_AGAP005510-RA	0	0.100199	0.120644	OeCa F	Oe	Ca	1	1
Anogam_AGAP005515-RA	0	0.103689	0.120644	OeCa F	Oe	Ca	1	1
Anogam_AGAP005520-RA	0	0.084493	0.120644	OeCa F	Oe	Ca	1	1
Anogam_AGAP005521-RA	0	0.0947159	0.120644	OeCa F	Oe	Ca	1	1
Anogam_AGAP013280-RA	0	0.084493	0.120644	OeCa F	Oe	Ca	1	1
Anogam_AGAP005524-RA	0.0852722	0.0528415	0.120644	OeCa F	Oe	Ca	0.108748	0.0234761
Anogam_AGAP005524-RB	-0.0852722	0.0418744	0.120644	OeCa F	Oe	Ca	0.891252	0.976524
Anogam_AGAP005526-RA	0	0.114656	0.120644	OeCa F	Oe	Ca	1	1
Anogam_AGAP005527-RA	0	0.0897308	0.120644	OeCa F	Oe	Ca	1	1
Anogam_AGAP005530-RA	0	0.0912263	0.120644	OeCa F	Oe	Ca	1	1
Anogam_AGAP005531-RA	0	0.108175	0.120644	OeCa F	Oe	Ca	1	1
Anogam_AGAP005533-RA	0	0.084493	0.120644	OeCa F	Oe	Ca	1	1
Anogam_AGAP005535-RA	0	0.0922233	0.120644	OeCa F	Oe	Ca	1	1
Anogam_AGAP005537-RA	0	0.105184	0.120644	OeCa F	Oe	Ca	1	1
Anogam_AGAP005539-RA	0	0.0915301	0.120644	OeCa F	Oe	Ca	1	1
Anogam_AGAP005540-RA	0	0.0932203	0.120644	OeCa F	Oe	Ca	1	1
Anogam_AGAP005542-RA	0	0.0932203	0.120644	OeCa F	Oe	Ca	1	1
Anogam_AGAP005543-RA	0	0.0947159	0.120644	OeCa F	Oe	Ca	1	1
Anogam_AGAP005544-RA	0	0.084493	0.120644	OeCa F	Oe	Ca	1	1
Anogam_AGAP005548-RA	0	0.101196	0.120644	OeCa F	Oe	Ca	1	1
Anogam_AGAP005550-RA	0	0.115653	0.120644	OeCa F	Oe	Ca	1	1
Anogam_AGAP005553-RA	0	0.100698	0.120644	OeCa F	Oe	Ca	1	1
Anogam_AGAP005555-RA	0	0.101196	0.120644	OeCa F	Oe	Ca	1	1
Anogam_AGAP005556-RB	0.377543	0.00797607	0.120644	OeCa F	Oe	Ca	0.840641	0.463099
Anogam_AGAP005556-RA	-0.377543	0.00747757	0.120644	OeCa F	Oe	Ca	0.159359	0.536901
Anogam_AGAP005560-RA	0	0.103689	0.120644	OeCa F	Oe	Ca	1	1
Anogam_AGAP005562-RA	0	0.084493	0.120644	OeCa F	Oe	Ca	1	1
Anogam_AGAP005564-RB	-0.132392	0.0299103	0.120644	OeCa F	Oe	Ca	0.0276439	0.160036
Anogam_AGAP005564-RD	-0.168068	0.0159046	0.120644	OeCa F	Oe	Ca	0.0557457	0.223813
Anogam_AGAP005564-RA	0.529795	0.000994036	0.120644	OeCa F	Oe	Ca	0.766952	0.237157
Anogam_AGAP005564-RC	-0.229335	0.0109344	0.120644	OeCa F	Oe	Ca	0.149658	0.378993
Anogam_AGAP005565-RA	0	0.084493	0.120644	OeCa F	Oe	Ca	1	1
Anogam_AGAP005566-RA	0	0.0927218	0.120644	OeCa F	Oe	Ca	1	1
Anogam_AGAP005568-RA	0	0.105683	0.120644	OeCa F	Oe	Ca	1	1
Anogam_AGAP005570-RA	0	0.0937188	0.120644	OeCa F	Oe	Ca	1	1
Anogam_AGAP005571-RA	0	0.0987039	0.120644	OeCa F	Oe	Ca	1	1
Anogam_AGAP005573-RA	0	0.0932203	0.120644	OeCa F	Oe	Ca	1	1
Anogam_AGAP005574-RA	0	0.116152	0.120644	OeCa F	Oe	Ca	1	1
Anogam_AGAP005575-RA	0	0.0982054	0.120644	OeCa F	Oe	Ca	1	1
Anogam_AGAP005578-RA	0	0.106181	0.120644	OeCa F	Oe	Ca	1	1
Anogam_AGAP005579-RA	0	0.105184	0.120644	OeCa F	Oe	Ca	1	1
Anogam_AGAP005582-RA	0	0.113659	0.120644	OeCa F	Oe	Ca	1	1
Anogam_AGAP005584-RA	0	0.105184	0.120644	OeCa F	Oe	Ca	1	1
Anogam_AGAP005588-RA	0	0.104686	0.120644	OeCa F	Oe	Ca	1	1
Anogam_AGAP005603-RA	0	0.084493	0.120644	OeCa F	Oe	Ca	1	1
Anogam_AGAP005605-RA	0	0.0907278	0.120644	OeCa F	Oe	Ca	1	1
Anogam_AGAP005608-RA	0	0.114656	0.120644	OeCa F	Oe	Ca	1	1
Anogam_AGAP005614-RA	0	0.104686	0.120644	OeCa F	Oe	Ca	1	1
Anogam_AGAP005616-RA	0	0.107677	0.120644	OeCa F	Oe	Ca	1	1
Anogam_AGAP005618-RA	0	0.0912263	0.120644	OeCa F	Oe	Ca	1	1
Anogam_AGAP005621-RA	0	0.084493	0.120644	OeCa F	Oe	Ca	1	1
Anogam_AGAP005623-RA	0	0.104686	0.120644	OeCa F	Oe	Ca	1	1
Anogam_AGAP005625-RA	0.00957789	0.0952144	0.120644	OeCa F	Oe	Ca	0.990775	0.981197
Anogam_AGAP005625-RB	-0.00957789	0.0987039	0.120644	OeCa F	Oe	Ca	0.00922464	0.0188025
Anogam_AGAP005630-RA	0	0.084493	0.120644	OeCa F	Oe	Ca	1	1
Anogam_AGAP005631-RA	0	0.105184	0.120644	OeCa F	Oe	Ca	1	1
Anogam_AGAP005634-RA	0	0.0942173	0.120644	OeCa F	Oe	Ca	1	1
Anogam_AGAP005635-RB	-0.142745	0.0208748	0.120644	OeCa F	Oe	Ca	0.244189	0.386934
Anogam_AGAP005635-RA	0.142745	0.0309073	0.120644	OeCa F	Oe	Ca	0.755811	0.613066
Anogam_AGAP005639-RA	0	0.100199	0.120644	OeCa F	Oe	Ca	1	1
Anogam_AGAP005641-RA	0	0.104187	0.120644	OeCa F	Oe	Ca	1	1
Anogam_AGAP005644-RA	0	0.10319	0.120644	OeCa F	Oe	Ca	1	1
Anogam_AGAP005645-RA	0	0.102193	0.120644	OeCa F	Oe	Ca	1	1
Anogam_AGAP005646-RA	0	0.107178	0.120644	OeCa F	Oe	Ca	1	1
Anogam_AGAP005647-RA	0	0.104686	0.120644	OeCa F	Oe	Ca	1	1
Anogam_AGAP005650-RA	0	0.084493	0.120644	OeCa F	Oe	Ca	1	1
Anogam_AGAP005653-RA	0	0.11665	0.120644	OeCa F	Oe	Ca	1	1
Anogam_AGAP005656-RA	0	0.101695	0.120644	OeCa F	Oe	Ca	1	1
Anogam_AGAP005657-RA	0	0.104686	0.120644	OeCa F	Oe	Ca	1	1
Anogam_AGAP005661-RB	-0.00450386	0.0735586	0.120644	OeCa F	Oe	Ca	0.00531777	0.00982163
Anogam_AGAP005661-RA	0.00450386	0.0735586	0.120644	OeCa F	Oe	Ca	0.994682	0.990178
Anogam_AGAP005662-RA	0	0.084493	0.120644	OeCa F	Oe	Ca	1	1
Anogam_AGAP005664-RA	0	0.0887338	0.120644	OeCa F	Oe	Ca	1	1
Anogam_AGAP005672-RB	-0.203527	0.0119641	0.120644	OeCa F	Oe	Ca	0.350739	0.554267
Anogam_AGAP005672-RA	0.203527	0.0259222	0.120644	OeCa F	Oe	Ca	0.649261	0.445733
Anogam_AGAP005673-RA	0	0.0977069	0.120644	OeCa F	Oe	Ca	1	1
Anogam_AGAP005674-RA	0	0.0917248	0.120644	OeCa F	Oe	Ca	1	1
Anogam_AGAP005677-RA	0	0.106181	0.120644	OeCa F	Oe	Ca	1	1
Anogam_AGAP005678-RA	0	0.117149	0.120644	OeCa F	Oe	Ca	1	1
Anogam_AGAP005680-RA	0	0.084493	0.120644	OeCa F	Oe	Ca	1	1
Anogam_AGAP005681-RA	0	0.100698	0.120644	OeCa F	Oe	Ca	1	1
Anogam_AGAP005683-RA	0	0.0927218	0.120644	OeCa F	Oe	Ca	1	1
Anogam_AGAP005685-RA	0	0.105184	0.120644	OeCa F	Oe	Ca	1	1
Anogam_AGAP005699-RA	0	0.084493	0.120644	OeCa F	Oe	Ca	1	1
Anogam_AGAP005701-RA	0	0.084493	0.120644	OeCa F	Oe	Ca	1	1
Anogam_AGAP005705-RA	0	0.084493	0.120644	OeCa F	Oe	Ca	1	1
Anogam_AGAP005712-RC	0.113302	0.0343968	0.120644	OeCa F	Oe	Ca	0.760955	0.647653
Anogam_AGAP005712-RA	-0.0807148	0.0453639	0.120644	OeCa F	Oe	Ca	0.120302	0.201016
Anogam_AGAP005712-RB	-0.0325871	0.0672981	0.120644	OeCa F	Oe	Ca	0.118744	0.151331
Anogam_AGAP028448-RA	0	0.0857428	0.120644	OeCa F	Oe	Ca	1	1
Anogam_AGAP005714-RA	0	0.102193	0.120644	OeCa F	Oe	Ca	1	1
Anogam_AGAP005717-RA	0	0.102692	0.120644	OeCa F	Oe	Ca	1	1
Anogam_AGAP005721-RA	0	0.084493	0.120644	OeCa F	Oe	Ca	1	1
Anogam_AGAP005725-RA	0	0.084493	0.120644	OeCa F	Oe	Ca	1	1
Anogam_AGAP013675-RA	0	0.112662	0.120644	OeCa F	Oe	Ca	1	1
Anogam_AGAP005728-RA	0	0.104686	0.120644	OeCa F	Oe	Ca	1	1
Anogam_AGAP005729-RA	0	0.0897308	0.120644	OeCa F	Oe	Ca	1	1
Anogam_AGAP005731-RA	-0.0162595	0.0877368	0.120644	OeCa F	Oe	Ca	0.983741	1
Anogam_AGAP005731-RB	0.0162595	0.0952144	0.120644	OeCa F	Oe	Ca	0.0162595	0
Anogam_AGAP005733-RA	0	0.0947159	0.120644	OeCa F	Oe	Ca	1	1
Anogam_AGAP005734-RA	0	0.107178	0.120644	OeCa F	Oe	Ca	1	1
Anogam_AGAP005738-RA	0	0.104187	0.120644	OeCa F	Oe	Ca	1	1
Anogam_AGAP005742-RA	0.0188498	0.0626243	0.120644	OeCa F	Oe	Ca	0.576472	0.557622
Anogam_AGAP005742-RB	-0.0188498	0.0812562	0.120644	OeCa F	Oe	Ca	0.423528	0.442378
Anogam_AGAP005745-RA	0	0.104686	0.120644	OeCa F	Oe	Ca	1	1
Anogam_AGAP005746-RA	0	0.108674	0.120644	OeCa F	Oe	Ca	1	1
Anogam_AGAP005749-RA	0	0.101695	0.120644	OeCa F	Oe	Ca	1	1
Anogam_AGAP005750-RA	0	0.104686	0.120644	OeCa F	Oe	Ca	1	1
Anogam_AGAP005751-RA	0	0.084493	0.120644	OeCa F	Oe	Ca	1	1
Anogam_AGAP005752-RA	0	0.105184	0.120644	OeCa F	Oe	Ca	1	1
Anogam_AGAP005759-RA	0	0.084493	0.120644	OeCa F	Oe	Ca	1	1
Anogam_AGAP005760-RA	0	0.084493	0.120644	OeCa F	Oe	Ca	1	1
Anogam_AGAP005762-RB	-0.22514	0.0129225	0.120644	OeCa F	Oe	Ca	0.285906	0.511046
Anogam_AGAP005762-RA	0.22514	0.0129225	0.120644	OeCa F	Oe	Ca	0.714094	0.488954
Anogam_AGAP005764-RA	0	0.084493	0.120644	OeCa F	Oe	Ca	1	1
Anogam_AGAP005766-RA	0	0.105683	0.120644	OeCa F	Oe	Ca	1	1
Anogam_AGAP005767-RA	0	0.084493	0.120644	OeCa F	Oe	Ca	1	1
Anogam_AGAP005768-RA	0	0.102692	0.120644	OeCa F	Oe	Ca	1	1
Anogam_AGAP005769-RA	0	0.104187	0.120644	OeCa F	Oe	Ca	1	1
Anogam_AGAP005771-RA	0	0.0927218	0.120644	OeCa F	Oe	Ca	1	1
Anogam_AGAP005773-RA	-0.00324068	0.0892323	0.120644	OeCa F	Oe	Ca	0.506646	0.509887
Anogam_AGAP005773-RB	0.00324068	0.0882353	0.120644	OeCa F	Oe	Ca	0.493354	0.490113
Anogam_AGAP005776-RA	0	0.102193	0.120644	OeCa F	Oe	Ca	1	1
Anogam_AGAP005778-RA	0	0.0962114	0.120644	OeCa F	Oe	Ca	1	1
Anogam_AGAP005782-RA	0	0.112164	0.120644	OeCa F	Oe	Ca	1	1
Anogam_AGAP005784-RA	0	0.0932203	0.120644	OeCa F	Oe	Ca	1	1
Anogam_AGAP005785-RA	0	0.0927218	0.120644	OeCa F	Oe	Ca	1	1
Anogam_AGAP028396-RA	0	0.104686	0.120644	OeCa F	Oe	Ca	1	1
Anogam_AGAP005788-RA	0	0.0892323	0.120644	OeCa F	Oe	Ca	1	1
Anogam_AGAP005789-RA	0	0.103689	0.120644	OeCa F	Oe	Ca	1	1
Anogam_AGAP005794-RA	0	0.101695	0.120644	OeCa F	Oe	Ca	1	1
Anogam_AGAP005795-RA	0	0.104686	0.120644	OeCa F	Oe	Ca	1	1
Anogam_AGAP005796-RA	0	0.084493	0.120644	OeCa F	Oe	Ca	1	1
Anogam_AGAP005797-RA	0	0.109671	0.120644	OeCa F	Oe	Ca	1	1
Anogam_AGAP005800-RA	0	0.084493	0.120644	OeCa F	Oe	Ca	1	1
Anogam_AGAP005802-RA	0	0.0932203	0.120644	OeCa F	Oe	Ca	1	1
Anogam_AGAP005803-RA	0	0.089899	0.120644	OeCa F	Oe	Ca	1	1
Anogam_AGAP005809-RA	0	0.0947159	0.120644	OeCa F	Oe	Ca	1	1
Anogam_AGAP005812-RA	0	0.102692	0.120644	OeCa F	Oe	Ca	1	1
Anogam_AGAP005815-RA	0	0.084493	0.120644	OeCa F	Oe	Ca	1	1
Anogam_AGAP005817-RA	0	0.0897308	0.120644	OeCa F	Oe	Ca	1	1
Anogam_AGAP005820-RA	0	0.101695	0.120644	OeCa F	Oe	Ca	1	1
Anogam_AGAP005821-RA	0	0.108175	0.120644	OeCa F	Oe	Ca	1	1
Anogam_AGAP005823-RA	0	0.084493	0.120644	OeCa F	Oe	Ca	1	1
Anogam_AGAP005825-RA	0	0.0887338	0.120644	OeCa F	Oe	Ca	1	1
Anogam_AGAP005828-RA	0.0609922	0.0447316	0.120644	OeCa F	Oe	Ca	0.068253	0.00726082
Anogam_AGAP005828-RB	-0.0788097	0.0498504	0.120644	OeCa F	Oe	Ca	0.456107	0.534916
Anogam_AGAP005828-RC	0.0178176	0.0692921	0.120644	OeCa F	Oe	Ca	0.47564	0.457823
Anogam_AGAP005831-RA	0	0.0967099	0.120644	OeCa F	Oe	Ca	1	1
Anogam_AGAP005833-RA	0	0.118146	0.120644	OeCa F	Oe	Ca	1	1
Anogam_AGAP005834-RA	0	0.114158	0.120644	OeCa F	Oe	Ca	1	1
Anogam_AGAP005835-RA	0	0.0957129	0.120644	OeCa F	Oe	Ca	1	1
Anogam_AGAP005836-RA	0	0.084493	0.120644	OeCa F	Oe	Ca	1	1
Anogam_AGAP005837-RA	0	0.084493	0.120644	OeCa F	Oe	Ca	1	1
Anogam_AGAP005838-RA	0	0.084493	0.120644	OeCa F	Oe	Ca	1	1
Anogam_AGAP005839-RA	0	0.103689	0.120644	OeCa F	Oe	Ca	1	1
Anogam_AGAP005842-RA	0	0.104187	0.120644	OeCa F	Oe	Ca	1	1
Anogam_AGAP005845-RA	0	0.105184	0.120644	OeCa F	Oe	Ca	1	1
Anogam_AGAP005847-RA	0	0.084493	0.120644	OeCa F	Oe	Ca	1	1
Anogam_AGAP005848-RA	0	0.0932203	0.120644	OeCa F	Oe	Ca	1	1
Anogam_AGAP005849-RA	0	0.0927218	0.120644	OeCa F	Oe	Ca	1	1
Anogam_AGAP005852-RA	0	0.084493	0.120644	OeCa F	Oe	Ca	1	1
Anogam_AGAP005856-RA	0	0.084493	0.120644	OeCa F	Oe	Ca	1	1
Anogam_AGAP005858-RA	0	0.0957129	0.120644	OeCa F	Oe	Ca	1	1
Anogam_AGAP005859-RA	0	0.103689	0.120644	OeCa F	Oe	Ca	1	1
Anogam_AGAP005860-RA	0	0.109671	0.120644	OeCa F	Oe	Ca	1	1
Anogam_AGAP005862-RA	0	0.084493	0.120644	OeCa F	Oe	Ca	1	1
Anogam_AGAP005863-RA	0	0.102193	0.120644	OeCa F	Oe	Ca	1	1
Anogam_AGAP005866-RA	0	0.0877368	0.120644	OeCa F	Oe	Ca	1	1
Anogam_AGAP005870-RA	-0.00333109	0.0927218	0.120644	OeCa F	Oe	Ca	0.0270666	0.0303977
Anogam_AGAP005870-RB	0.00333109	0.104187	0.120644	OeCa F	Oe	Ca	0.972933	0.969602
Anogam_AGAP005874-RA	0	0.102692	0.120644	OeCa F	Oe	Ca	1	1
Anogam_AGAP005878-RB	-0.0706587	0.0418744	0.120644	OeCa F	Oe	Ca	0.80962	0.880278
Anogam_AGAP005878-RA	0.0706587	0.0478564	0.120644	OeCa F	Oe	Ca	0.19038	0.119722
Anogam_AGAP005881-RA	0	0.0847458	0.120644	OeCa F	Oe	Ca	1	1
Anogam_AGAP005882-RA	0	0.084493	0.120644	OeCa F	Oe	Ca	1	1
Anogam_AGAP005885-RA	0	0.0897308	0.120644	OeCa F	Oe	Ca	1	1
Anogam_AGAP005890-RA	-0.0195444	0.0802592	0.120644	OeCa F	Oe	Ca	0.0244517	0.0439961
Anogam_AGAP005890-RB	0.0195444	0.0707876	0.120644	OeCa F	Oe	Ca	0.975548	0.956004
Anogam_AGAP005892-RA	0	0.105184	0.120644	OeCa F	Oe	Ca	1	1
Anogam_AGAP005894-RA	0	0.084493	0.120644	OeCa F	Oe	Ca	1	1
Anogam_AGAP005899-RA	0	0.0982054	0.120644	OeCa F	Oe	Ca	1	1
Anogam_AGAP005906-RA	0	0.0992024	0.120644	OeCa F	Oe	Ca	1	1
Anogam_AGAP005907-RA	0	0.100199	0.120644	OeCa F	Oe	Ca	1	1
Anogam_AGAP005909-RA	0	0.0917248	0.120644	OeCa F	Oe	Ca	1	1
Anogam_AGAP005911-RA	0	0.117149	0.120644	OeCa F	Oe	Ca	1	1
Anogam_AGAP005912-RA	0	0.107178	0.120644	OeCa F	Oe	Ca	1	1
Anogam_AGAP005913-RA	0	0.0957129	0.120644	OeCa F	Oe	Ca	1	1
Anogam_AGAP005915-RA	0	0.0922233	0.120644	OeCa F	Oe	Ca	1	1
Anogam_AGAP005916-RA	0	0.106181	0.120644	OeCa F	Oe	Ca	1	1
Anogam_AGAP005922-RA	0	0.107677	0.120644	OeCa F	Oe	Ca	1	1
Anogam_AGAP005924-RA	0	0.084493	0.120644	OeCa F	Oe	Ca	1	1
Anogam_AGAP005925-RA	0	0.084493	0.120644	OeCa F	Oe	Ca	1	1
Anogam_AGAP005926-RA	0	0.107677	0.120644	OeCa F	Oe	Ca	1	1
Anogam_AGAP005928-RA	-0.0934861	0.0347913	0.120644	OeCa F	Oe	Ca	0.651384	0.74487
Anogam_AGAP005928-RB	0.0934861	0.0468594	0.120644	OeCa F	Oe	Ca	0.348616	0.25513
Anogam_AGAP005929-RA	0	0.101196	0.120644	OeCa F	Oe	Ca	1	1
Anogam_AGAP005932-RA	0	0.0997009	0.120644	OeCa F	Oe	Ca	1	1
Anogam_AGAP005933-RA	0	0.105184	0.120644	OeCa F	Oe	Ca	1	1
Anogam_AGAP005936-RA	0	0.0897308	0.120644	OeCa F	Oe	Ca	1	1
Anogam_AGAP005938-RA	0	0.105184	0.120644	OeCa F	Oe	Ca	1	1
Anogam_AGAP005939-RA	0	0.0897114	0.120644	OeCa F	Oe	Ca	1	1
Anogam_AGAP005941-RA	0	0.112662	0.120644	OeCa F	Oe	Ca	1	1
Anogam_AGAP005942-RA	-0.309001	0.00596421	0.120644	OeCa F	Oe	Ca	0.666667	0.975668
Anogam_AGAP005942-RB	0.309001	0.00596421	0.120644	OeCa F	Oe	Ca	0.333333	0.0243322
Anogam_AGAP005944-RA	0	0.084493	0.120644	OeCa F	Oe	Ca	1	1
Anogam_AGAP005945-RA	-0.0623777	0.0447316	0.120644	OeCa F	Oe	Ca	0.236632	0.29901
Anogam_AGAP005945-RB	0.0623777	0.0447316	0.120644	OeCa F	Oe	Ca	0.763368	0.70099
Anogam_AGAP005946-RA	0	0.0987039	0.120644	OeCa F	Oe	Ca	1	1
Anogam_AGAP005949-RB	-0.343163	0.00897308	0.120644	OeCa F	Oe	Ca	0.630991	0.974154
Anogam_AGAP005949-RA	0.343163	0.00497018	0.120644	OeCa F	Oe	Ca	0.369009	0.0258462
Anogam_AGAP005954-RA	0	0.105683	0.120644	OeCa F	Oe	Ca	1	1
Anogam_AGAP005956-RA	0	0.084493	0.120644	OeCa F	Oe	Ca	1	1
Anogam_AGAP005958-RA	0	0.115653	0.120644	OeCa F	Oe	Ca	1	1
Anogam_AGAP005960-RA	0	0.0952144	0.120644	OeCa F	Oe	Ca	1	1
Anogam_AGAP005962-RA	0	0.10668	0.120644	OeCa F	Oe	Ca	1	1
Anogam_AGAP005963-RA	0	0.118146	0.120644	OeCa F	Oe	Ca	1	1
Anogam_AGAP005964-RB	0	0.10319	0.120644	OeCa F	Oe	Ca	0	0
Anogam_AGAP005964-RA	0	0.116152	0.120644	OeCa F	Oe	Ca	1	1
Anogam_AGAP005970-RA	0	0.0937188	0.120644	OeCa F	Oe	Ca	1	1
Anogam_AGAP005971-RA	0	0.101695	0.120644	OeCa F	Oe	Ca	1	1
Anogam_AGAP005973-RA	0	0.113659	0.120644	OeCa F	Oe	Ca	1	1
Anogam_AGAP005975-RA	0	0.104686	0.120644	OeCa F	Oe	Ca	1	1
Anogam_AGAP028397-RA	0	0.105184	0.120644	OeCa F	Oe	Ca	1	1
Anogam_AGAP005978-RA	-0.0618179	0.0458624	0.120644	OeCa F	Oe	Ca	0.196321	0.258138
Anogam_AGAP005978-RB	0.0618179	0.052343	0.120644	OeCa F	Oe	Ca	0.803679	0.741862
Anogam_AGAP005981-RA	0	0.10668	0.120644	OeCa F	Oe	Ca	1	1
Anogam_AGAP005983-RA	0	0.111167	0.120644	OeCa F	Oe	Ca	1	1
Anogam_AGAP005990-RA	0	0.111665	0.120644	OeCa F	Oe	Ca	1	1
Anogam_AGAP005992-RA	0	0.115155	0.120644	OeCa F	Oe	Ca	1	1
Anogam_AGAP005993-RA	0	0.115653	0.120644	OeCa F	Oe	Ca	1	1
Anogam_AGAP005995-RA	0	0.0982054	0.120644	OeCa F	Oe	Ca	1	1
Anogam_AGAP005996-RA	0	0.112662	0.120644	OeCa F	Oe	Ca	1	1
Anogam_AGAP005998-RA	0	0.107178	0.120644	OeCa F	Oe	Ca	1	1
Anogam_AGAP005999-RA	0	0.0877368	0.120644	OeCa F	Oe	Ca	1	1
Anogam_AGAP006000-RA	0	0.107677	0.120644	OeCa F	Oe	Ca	1	1
Anogam_AGAP006001-RA	0	0.0967099	0.120644	OeCa F	Oe	Ca	1	1
Anogam_AGAP006015-RA	0	0.103689	0.120644	OeCa F	Oe	Ca	1	1
Anogam_AGAP006016-RA	0	0.084493	0.120644	OeCa F	Oe	Ca	1	1
Anogam_AGAP006017-RA	0	0.084493	0.120644	OeCa F	Oe	Ca	1	1
Anogam_AGAP006018-RB	-0.199689	0.0189432	0.120644	OeCa F	Oe	Ca	0.351422	0.551111
Anogam_AGAP006018-RA	0.199689	0.0129225	0.120644	OeCa F	Oe	Ca	0.648578	0.448889
Anogam_AGAP006020-RA	0	0.084493	0.120644	OeCa F	Oe	Ca	1	1
Anogam_AGAP006022-RA	0	0.0947159	0.120644	OeCa F	Oe	Ca	1	1
Anogam_AGAP006023-RA	0.0833552	0.0358923	0.120644	OeCa F	Oe	Ca	0.579064	0.495709
Anogam_AGAP006023-RB	-0.0833552	0.0448654	0.120644	OeCa F	Oe	Ca	0.420936	0.504291
Anogam_AGAP006024-RA	0	0.0947159	0.120644	OeCa F	Oe	Ca	1	1
Anogam_AGAP006025-RA	0	0.0887338	0.120644	OeCa F	Oe	Ca	1	1
Anogam_AGAP006026-RA	0	0.106181	0.120644	OeCa F	Oe	Ca	1	1
Anogam_AGAP006030-RA	0	0.084493	0.120644	OeCa F	Oe	Ca	1	1
Anogam_AGAP006034-RA	0	0.084493	0.120644	OeCa F	Oe	Ca	1	1
Anogam_AGAP006039-RA	0	0.0922233	0.120644	OeCa F	Oe	Ca	1	1
Anogam_AGAP006040-RA	0	0.084493	0.120644	OeCa F	Oe	Ca	1	1
Anogam_AGAP006042-RA	-0.00559187	0.0812562	0.120644	OeCa F	Oe	Ca	0.251737	0.257329
Anogam_AGAP006042-RB	0.00559187	0.0725646	0.120644	OeCa F	Oe	Ca	0.748263	0.742671
Anogam_AGAP029130-RA	0	0.10319	0.120644	OeCa F	Oe	Ca	1	1
Anogam_AGAP029102-RA	0	0.0932203	0.120644	OeCa F	Oe	Ca	1	1
Anogam_AGAP006045-RA	0	0.084493	0.120644	OeCa F	Oe	Ca	1	1
Anogam_AGAP006047-RA	0	0.0977069	0.120644	OeCa F	Oe	Ca	1	1
Anogam_AGAP006048-RA	0	0.110668	0.120644	OeCa F	Oe	Ca	1	1
Anogam_AGAP006049-RA	0	0.0952144	0.120644	OeCa F	Oe	Ca	1	1
Anogam_AGAP006050-RA	0	0.110668	0.120644	OeCa F	Oe	Ca	1	1
Anogam_AGAP029185-RA	0	0.100199	0.120644	OeCa F	Oe	Ca	1	1
Anogam_AGAP006055-RA	0	0.0912263	0.120644	OeCa F	Oe	Ca	1	1
Anogam_AGAP006057-RA	0	0.108674	0.120644	OeCa F	Oe	Ca	1	1
Anogam_AGAP006058-RA	0	0.105184	0.120644	OeCa F	Oe	Ca	1	1
Anogam_AGAP006059-RA	0	0.100698	0.120644	OeCa F	Oe	Ca	1	1
Anogam_AGAP006062-RA	0	0.084493	0.120644	OeCa F	Oe	Ca	1	1
Anogam_AGAP006064-RA	0	0.084493	0.120644	OeCa F	Oe	Ca	1	1
Anogam_AGAP006068-RB	0.313847	0.00596421	0.120644	OeCa F	Oe	Ca	0.328906	0.0150585
Anogam_AGAP006068-RC	-0.277624	0.00894632	0.120644	OeCa F	Oe	Ca	0.281104	0.558728
Anogam_AGAP006068-RA	-0.0362237	0.0536779	0.120644	OeCa F	Oe	Ca	0.38999	0.426214
Anogam_AGAP006069-RA	0	0.109172	0.120644	OeCa F	Oe	Ca	1	1
Anogam_AGAP006072-RA	0	0.105683	0.120644	OeCa F	Oe	Ca	1	1
Anogam_AGAP006082-RA	0	0.103689	0.120644	OeCa F	Oe	Ca	1	1
Anogam_AGAP006083-RA	0	0.104686	0.120644	OeCa F	Oe	Ca	0	0
Anogam_AGAP006083-RB	0	0.115155	0.120644	OeCa F	Oe	Ca	1	1
Anogam_AGAP006085-RA	0	0.106181	0.120644	OeCa F	Oe	Ca	1	1
Anogam_AGAP006088-RA	0	0.111167	0.120644	OeCa F	Oe	Ca	1	1
Anogam_AGAP006090-RA	0	0.118146	0.120644	OeCa F	Oe	Ca	1	1
Anogam_AGAP006092-RA	0	0.0877368	0.120644	OeCa F	Oe	Ca	1	1
Anogam_AGAP006093-RA	0	0.0987039	0.120644	OeCa F	Oe	Ca	1	1
Anogam_AGAP006096-RA	0	0.106181	0.120644	OeCa F	Oe	Ca	1	1
Anogam_AGAP006097-RA	0.0287761	0.0677966	0.120644	OeCa F	Oe	Ca	0.916917	0.888141
Anogam_AGAP006097-RB	-0.0287761	0.055666	0.120644	OeCa F	Oe	Ca	0.0830827	0.111859
Anogam_AGAP006100-RA	0	0.104187	0.120644	OeCa F	Oe	Ca	1	1
Anogam_AGAP006105-RA	0	0.0937188	0.120644	OeCa F	Oe	Ca	1	1
Anogam_AGAP006109-RA	0	0.101695	0.120644	OeCa F	Oe	Ca	1	1
Anogam_AGAP028452-RA	0	0.100698	0.120644	OeCa F	Oe	Ca	1	1
Anogam_AGAP006118-RA	0	0.117149	0.120644	OeCa F	Oe	Ca	1	1
Anogam_AGAP006119-RA	0	0.084493	0.120644	OeCa F	Oe	Ca	1	1
Anogam_AGAP006120-RA	0	0.084493	0.120644	OeCa F	Oe	Ca	1	1
Anogam_AGAP006121-RA	0	0.101196	0.120644	OeCa F	Oe	Ca	1	1
Anogam_AGAP006127-RA	0	0.0962114	0.120644	OeCa F	Oe	Ca	1	1
Anogam_AGAP006129-RA	0	0.0992024	0.120644	OeCa F	Oe	Ca	1	1
Anogam_AGAP006130-RA	0	0.105184	0.120644	OeCa F	Oe	Ca	1	1
Anogam_AGAP006132-RA	0	0.0992024	0.120644	OeCa F	Oe	Ca	1	1
Anogam_AGAP006133-RA	0.156877	0.0219342	0.120644	OeCa F	Oe	Ca	0.68165	0.524773
Anogam_AGAP006133-RB	-0.156877	0.0178926	0.120644	OeCa F	Oe	Ca	0.31835	0.475227
Anogam_AGAP006134-RA	0	0.084493	0.120644	OeCa F	Oe	Ca	1	1
Anogam_AGAP006136-RA	0	0.0927218	0.120644	OeCa F	Oe	Ca	1	1
Anogam_AGAP006141-RB	0.0970809	0.0358923	0.120644	OeCa F	Oe	Ca	0.323946	0.226865
Anogam_AGAP006141-RA	-0.0970809	0.0423729	0.120644	OeCa F	Oe	Ca	0.676054	0.773135
Anogam_AGAP006143-RE	-0.344314	0.0109671	0.120644	OeCa F	Oe	Ca	0.155686	0.5
Anogam_AGAP006143-RC	-0.10319	0.0337972	0.120644	OeCa F	Oe	Ca	0.352954	0.456144
Anogam_AGAP006143-RA	-0.0212065	0.0672981	0.120644	OeCa F	Oe	Ca	0.0226496	0.043856
Anogam_AGAP006143-RB	0	0.109172	0.120644	OeCa F	Oe	Ca	0	0
Anogam_AGAP006143-RD	0.0751097	0.0443669	0.120644	OeCa F	Oe	Ca	0.0751097	0
Anogam_AGAP006143-RF	0.393601	0.00198807	0.120644	OeCa F	Oe	Ca	0.393601	0
Anogam_AGAP006147-RA	0	0.084493	0.120644	OeCa F	Oe	Ca	1	1
Anogam_AGAP006149-RA	0	0.0962114	0.120644	OeCa F	Oe	Ca	1	1
Anogam_AGAP006158-RA	0	0.0977069	0.120644	OeCa F	Oe	Ca	1	1
Anogam_AGAP006159-RA	0	0.10319	0.120644	OeCa F	Oe	Ca	1	1
Anogam_AGAP006162-RA	0	0.084493	0.120644	OeCa F	Oe	Ca	1	1
Anogam_AGAP006164-RA	0	0.084493	0.120644	OeCa F	Oe	Ca	1	1
Anogam_AGAP006166-RA	0	0.100698	0.120644	OeCa F	Oe	Ca	1	1
Anogam_AGAP006169-RA	0	0.084493	0.120644	OeCa F	Oe	Ca	1	1
Anogam_AGAP006173-RA	0	0.0947159	0.120644	OeCa F	Oe	Ca	1	1
Anogam_AGAP006175-RA	0	0.084493	0.120644	OeCa F	Oe	Ca	1	1
Anogam_AGAP006176-RA	0.468083	0.000994036	0.120644	OeCa F	Oe	Ca	0.5	0.0319167
Anogam_AGAP006176-RB	-0.468083	0.00747757	0.120644	OeCa F	Oe	Ca	0.5	0.968083
Anogam_AGAP006177-RA	0	0.110169	0.120644	OeCa F	Oe	Ca	1	1
Anogam_AGAP006178-RB	0	0.100698	0.120644	OeCa F	Oe	Ca	0	0
Anogam_AGAP006178-RC	0	0.0892323	0.120644	OeCa F	Oe	Ca	0	0
Anogam_AGAP006178-RA	0	0.10668	0.120644	OeCa F	Oe	Ca	1	1
Anogam_AGAP006179-RA	0.0386806	0.059322	0.120644	OeCa F	Oe	Ca	0.0386806	0
Anogam_AGAP006179-RC	-0.0240373	0.0777667	0.120644	OeCa F	Oe	Ca	0.157157	0.181194
Anogam_AGAP006179-RB	-0.0146433	0.0742772	0.120644	OeCa F	Oe	Ca	0.804163	0.818806
Anogam_AGAP006183-RA	0	0.115155	0.120644	OeCa F	Oe	Ca	1	1
Anogam_AGAP006188-RB	0.0466229	0.056331	0.120644	OeCa F	Oe	Ca	0.731028	0.684405
Anogam_AGAP006188-RA	-0.0466229	0.0578265	0.120644	OeCa F	Oe	Ca	0.268972	0.315595
Anogam_AGAP006190-RA	0	0.0962114	0.120644	OeCa F	Oe	Ca	1	1
Anogam_AGAP006192-RA	0	0.115653	0.120644	OeCa F	Oe	Ca	1	1
Anogam_AGAP006193-RA	0	0.0922233	0.120644	OeCa F	Oe	Ca	1	1
Anogam_AGAP006194-RA	0	0.084493	0.120644	OeCa F	Oe	Ca	1	1
Anogam_AGAP006195-RA	0	0.084493	0.120644	OeCa F	Oe	Ca	1	1
Anogam_AGAP006199-RA	0	0.0992024	0.120644	OeCa F	Oe	Ca	1	1
Anogam_AGAP006200-RA	0	0.084493	0.120644	OeCa F	Oe	Ca	1	1
Anogam_AGAP006201-RA	0	0.0937188	0.120644	OeCa F	Oe	Ca	1	1
Anogam_AGAP006202-RA	0	0.0927218	0.120644	OeCa F	Oe	Ca	1	1
Anogam_AGAP006203-RA	0	0.105184	0.120644	OeCa F	Oe	Ca	1	1
Anogam_AGAP006204-RA	0	0.100698	0.120644	OeCa F	Oe	Ca	1	1
Anogam_AGAP006206-RA	0.205973	0.0169492	0.120644	OeCa F	Oe	Ca	0.206908	0.000934517
Anogam_AGAP006206-RB	-0.205973	0.0129225	0.120644	OeCa F	Oe	Ca	0.793092	0.999065
Anogam_AGAP006210-RA	0	0.111167	0.120644	OeCa F	Oe	Ca	1	1
Anogam_AGAP006211-RA	0	0.101695	0.120644	OeCa F	Oe	Ca	1	1
Anogam_AGAP006213-RA	0	0.100698	0.120644	OeCa F	Oe	Ca	1	1
Anogam_AGAP028453-RA	0	0.103689	0.120644	OeCa F	Oe	Ca	1	1
Anogam_AGAP006214-RA	0	0.084493	0.120644	OeCa F	Oe	Ca	1	1
Anogam_AGAP006215-RA	0	0.084493	0.120644	OeCa F	Oe	Ca	1	1
Anogam_AGAP006216-RA	0.0226778	0.0596421	0.120644	OeCa F	Oe	Ca	0.928419	0.905741
Anogam_AGAP006216-RB	-0.0226778	0.0596421	0.120644	OeCa F	Oe	Ca	0.071581	0.0942588
Anogam_AGAP006217-RA	0	0.084493	0.120644	OeCa F	Oe	Ca	1	1
Anogam_AGAP006218-RA	0	0.084493	0.120644	OeCa F	Oe	Ca	1	1
Anogam_AGAP006227-RA	0	0.084493	0.120644	OeCa F	Oe	Ca	1	1
Anogam_AGAP006232-RA	0	0.084493	0.120644	OeCa F	Oe	Ca	1	1
Anogam_AGAP006235-RA	0	0.104187	0.120644	OeCa F	Oe	Ca	1	1
Anogam_AGAP006236-RA	0	0.101695	0.120644	OeCa F	Oe	Ca	1	1
Anogam_AGAP006237-RA	0	0.107677	0.120644	OeCa F	Oe	Ca	1	1
Anogam_AGAP006240-RA	0	0.101695	0.120644	OeCa F	Oe	Ca	1	1
Anogam_AGAP006243-RA	0	0.0937188	0.120644	OeCa F	Oe	Ca	1	1
Anogam_AGAP029069-RA	0	0.0907278	0.120644	OeCa F	Oe	Ca	1	1
Anogam_AGAP006245-RA	0	0.110668	0.120644	OeCa F	Oe	Ca	1	1
Anogam_AGAP006246-RA	0	0.084493	0.120644	OeCa F	Oe	Ca	1	1
Anogam_AGAP006249-RA	0	0.084493	0.120644	OeCa F	Oe	Ca	1	1
Anogam_AGAP006251-RA	0	0.108674	0.120644	OeCa F	Oe	Ca	1	1
Anogam_AGAP006254-RA	-0.0382182	0.0628116	0.120644	OeCa F	Oe	Ca	0.430659	0.468877
Anogam_AGAP006254-RC	-0.0781994	0.0373878	0.120644	OeCa F	Oe	Ca	0.261486	0.339685
Anogam_AGAP006254-RB	0.116418	0.0298211	0.120644	OeCa F	Oe	Ca	0.307855	0.191438
Anogam_AGAP006256-RA	0	0.117647	0.120644	OeCa F	Oe	Ca	1	1
Anogam_AGAP028399-RA	0	0.0997009	0.120644	OeCa F	Oe	Ca	1	1
Anogam_AGAP006257-RA	0	0.0937188	0.120644	OeCa F	Oe	Ca	1	1
Anogam_AGAP006258-RA	0	0.104187	0.120644	OeCa F	Oe	Ca	1	1
Anogam_AGAP006259-RA	0	0.118146	0.120644	OeCa F	Oe	Ca	1	1
Anogam_AGAP006260-RD	-0.224011	0.0114656	0.120644	OeCa F	Oe	Ca	0.464283	0.688294
Anogam_AGAP006260-RA	0.087081	0.0493519	0.120644	OeCa F	Oe	Ca	0.112504	0.0254234
Anogam_AGAP006260-RB	-0.0880985	0.0443669	0.120644	OeCa F	Oe	Ca	0.0207692	0.108868
Anogam_AGAP006260-RC	0.225029	0.0174477	0.120644	OeCa F	Oe	Ca	0.402444	0.177415
Anogam_AGAP006261-RA	0	0.0982054	0.120644	OeCa F	Oe	Ca	1	1
Anogam_AGAP006262-RA	0	0.0882353	0.120644	OeCa F	Oe	Ca	1	1
Anogam_AGAP006263-RA	0	0.0987039	0.120644	OeCa F	Oe	Ca	1	1
Anogam_AGAP006265-RA	0	0.0962114	0.120644	OeCa F	Oe	Ca	1	1
Anogam_AGAP006267-RA	0	0.084493	0.120644	OeCa F	Oe	Ca	1	1
Anogam_AGAP006268-RA	0	0.0982054	0.120644	OeCa F	Oe	Ca	1	1
Anogam_AGAP006269-RA	0	0.108175	0.120644	OeCa F	Oe	Ca	1	1
Anogam_AGAP006270-RA	0	0.084493	0.120644	OeCa F	Oe	Ca	1	1
Anogam_AGAP006271-RA	0	0.084493	0.120644	OeCa F	Oe	Ca	1	1
Anogam_AGAP006273-RA	0	0.100698	0.120644	OeCa F	Oe	Ca	1	1
Anogam_AGAP029191-RA	0	0.114656	0.120644	OeCa F	Oe	Ca	1	1
Anogam_AGAP006280-RA	0	0.0957129	0.120644	OeCa F	Oe	Ca	1	1
Anogam_AGAP006324-RA	0	0.100698	0.120644	OeCa F	Oe	Ca	1	1
Anogam_AGAP006325-RA	0	0.084493	0.120644	OeCa F	Oe	Ca	1	1
Anogam_AGAP006339-RA	0	0.10319	0.120644	OeCa F	Oe	Ca	1	1
Anogam_AGAP006344-RA	0	0.101695	0.120644	OeCa F	Oe	Ca	1	1
Anogam_AGAP006346-RA	-0.249178	0.00994036	0.120644	OeCa F	Oe	Ca	0.0559366	0.305115
Anogam_AGAP006346-RB	0.207581	0.0129225	0.120644	OeCa F	Oe	Ca	0.259659	0.0520778
Anogam_AGAP006346-RC	0.0415976	0.054337	0.120644	OeCa F	Oe	Ca	0.684405	0.642807
Anogam_AGAP006347-RA	-0.172331	0.0214357	0.120644	OeCa F	Oe	Ca	0.827669	1
Anogam_AGAP006347-RB	0.172331	0.0149551	0.120644	OeCa F	Oe	Ca	0.172331	0
Anogam_AGAP006348-RA	0	0.10319	0.120644	OeCa F	Oe	Ca	1	1
Anogam_AGAP006354-RA	0	0.0997009	0.120644	OeCa F	Oe	Ca	1	1
Anogam_AGAP006357-RA	0	0.084493	0.120644	OeCa F	Oe	Ca	1	1
Anogam_AGAP006359-RA	0	0.10319	0.120644	OeCa F	Oe	Ca	1	1
Anogam_AGAP006366-RB	0.0100465	0.0715706	0.120644	OeCa F	Oe	Ca	0.0408267	0.0307802
Anogam_AGAP006366-RC	0.0942422	0.0347913	0.120644	OeCa F	Oe	Ca	0.648382	0.55414
Anogam_AGAP006366-RD	-0.129944	0.0289133	0.120644	OeCa F	Oe	Ca	0.0804119	0.210356
Anogam_AGAP006366-RA	0.0216678	0.0702891	0.120644	OeCa F	Oe	Ca	0.226384	0.204716
Anogam_AGAP006366-RE	0.00398724	0.101196	0.120644	OeCa F	Oe	Ca	0.0039952	7.96001e-06
Anogam_AGAP006367-RA	0	0.10319	0.120644	OeCa F	Oe	Ca	1	1
Anogam_AGAP006371-RA	0	0.101196	0.120644	OeCa F	Oe	Ca	1	1
Anogam_AGAP006373-RA	0	0.0972084	0.120644	OeCa F	Oe	Ca	1	1
Anogam_AGAP006379-RA	0	0.107178	0.120644	OeCa F	Oe	Ca	1	1
Anogam_AGAP006383-RA	0	0.104187	0.120644	OeCa F	Oe	Ca	1	1
Anogam_AGAP006385-RA	0	0.0997009	0.120644	OeCa F	Oe	Ca	1	1
Anogam_AGAP006387-RA	0	0.11665	0.120644	OeCa F	Oe	Ca	1	1
Anogam_AGAP006389-RA	0	0.115653	0.120644	OeCa F	Oe	Ca	1	1
Anogam_AGAP006392-RA	0	0.105683	0.120644	OeCa F	Oe	Ca	1	1
Anogam_AGAP006394-RA	0	0.0987039	0.120644	OeCa F	Oe	Ca	1	1
Anogam_AGAP006396-RA	0	0.0957129	0.120644	OeCa F	Oe	Ca	1	1
Anogam_AGAP006399-RA	0	0.0897308	0.120644	OeCa F	Oe	Ca	1	1
Anogam_AGAP006402-RA	0	0.0982054	0.120644	OeCa F	Oe	Ca	1	1
Anogam_AGAP006404-RA	0	0.100199	0.120644	OeCa F	Oe	Ca	1	1
Anogam_AGAP006405-RA	0	0.084493	0.120644	OeCa F	Oe	Ca	1	1
Anogam_AGAP006408-RA	0	0.084493	0.120644	OeCa F	Oe	Ca	1	1
Anogam_AGAP006413-RA	0	0.084493	0.120644	OeCa F	Oe	Ca	1	1
Anogam_AGAP006414-RA	0	0.0877368	0.120644	OeCa F	Oe	Ca	1	1
Anogam_AGAP006415-RA	0	0.0972084	0.120644	OeCa F	Oe	Ca	1	1
Anogam_AGAP006417-RA	0	0.0997009	0.120644	OeCa F	Oe	Ca	1	1
Anogam_AGAP006422-RA	0	0.0962114	0.120644	OeCa F	Oe	Ca	1	1
Anogam_AGAP006423-RA	0	0.0997009	0.120644	OeCa F	Oe	Ca	1	1
Anogam_AGAP006424-RA	0	0.0972084	0.120644	OeCa F	Oe	Ca	1	1
Anogam_AGAP006425-RA	0	0.106181	0.120644	OeCa F	Oe	Ca	1	1
Anogam_AGAP006426-RA	0	0.104686	0.120644	OeCa F	Oe	Ca	1	1
Anogam_AGAP006427-RA	0	0.084493	0.120644	OeCa F	Oe	Ca	1	1
Anogam_AGAP006427-RB	0	0.084493	0.120644	OeCa F	Oe	Ca	0	0
Anogam_AGAP006428-RA	0	0.0862413	0.120644	OeCa F	Oe	Ca	1	1
Anogam_AGAP006431-RA	0	0.084493	0.120644	OeCa F	Oe	Ca	1	1
Anogam_AGAP006433-RA	0	0.102692	0.120644	OeCa F	Oe	Ca	1	1
Anogam_AGAP028457-RA	0	0.111167	0.120644	OeCa F	Oe	Ca	1	1
Anogam_AGAP006438-RA	0	0.084493	0.120644	OeCa F	Oe	Ca	1	1
Anogam_AGAP006439-RA	0	0.084493	0.120644	OeCa F	Oe	Ca	1	1
Anogam_AGAP029172-RA	0	0.104686	0.120644	OeCa F	Oe	Ca	1	1
Anogam_AGAP006441-RA	-0.246819	0.0129611	0.120644	OeCa F	Oe	Ca	0.396608	0.643428
Anogam_AGAP006441-RB	0.246819	0.0154536	0.120644	OeCa F	Oe	Ca	0.603392	0.356572
Anogam_AGAP006445-RA	0	0.0947159	0.120644	OeCa F	Oe	Ca	1	1
Anogam_AGAP006448-RB	-0.00720529	0.0725646	0.120644	OeCa F	Oe	Ca	0.0576204	0.0648257
Anogam_AGAP006448-RC	0.034624	0.0658026	0.120644	OeCa F	Oe	Ca	0.0377703	0.00314629
Anogam_AGAP006448-RD	0.00232879	0.0947159	0.120644	OeCa F	Oe	Ca	0.00232879	0
Anogam_AGAP006448-RA	-0.0297475	0.055666	0.120644	OeCa F	Oe	Ca	0.902281	0.932028
Anogam_AGAP006449-RA	0	0.084493	0.120644	OeCa F	Oe	Ca	1	1
Anogam_AGAP006450-RA	0	0.084493	0.120644	OeCa F	Oe	Ca	1	1
Anogam_AGAP006451-RA	0	0.084493	0.120644	OeCa F	Oe	Ca	1	1
Anogam_AGAP006453-RA	0	0.084493	0.120644	OeCa F	Oe	Ca	1	1
Anogam_AGAP006454-RA	0	0.111167	0.120644	OeCa F	Oe	Ca	1	1
Anogam_AGAP006458-RA	0	0.084493	0.120644	OeCa F	Oe	Ca	1	1
Anogam_AGAP006470-RA	0	0.0957129	0.120644	OeCa F	Oe	Ca	1	1
Anogam_AGAP013092-RA	0	0.084493	0.120644	OeCa F	Oe	Ca	1	1
Anogam_AGAP006471-RA	0	0.110668	0.120644	OeCa F	Oe	Ca	1	1
Anogam_AGAP006475-RA	0	0.10319	0.120644	OeCa F	Oe	Ca	1	1
Anogam_AGAP006480-RA	-0.0446029	0.0588235	0.120644	OeCa F	Oe	Ca	0.635708	0.680311
Anogam_AGAP006480-RB	0.0446029	0.0667996	0.120644	OeCa F	Oe	Ca	0.364292	0.319689
Anogam_AGAP006490-RA	0	0.084493	0.120644	OeCa F	Oe	Ca	1	1
Anogam_AGAP006494-RA	0	0.084493	0.120644	OeCa F	Oe	Ca	1	1
Anogam_AGAP006495-RA	0	0.0932203	0.120644	OeCa F	Oe	Ca	1	1
Anogam_AGAP006496-RA	0	0.112662	0.120644	OeCa F	Oe	Ca	1	1
Anogam_AGAP006501-RA	0	0.10668	0.120644	OeCa F	Oe	Ca	1	1
Anogam_AGAP006506-RA	0	0.114656	0.120644	OeCa F	Oe	Ca	1	1
Anogam_AGAP006508-RB	0.0190698	0.0717846	0.120644	OeCa F	Oe	Ca	0.973066	0.953996
Anogam_AGAP006508-RA	-0.0190698	0.0626243	0.120644	OeCa F	Oe	Ca	0.0269345	0.0460042
Anogam_AGAP006512-RA	0	0.103689	0.120644	OeCa F	Oe	Ca	1	1
Anogam_AGAP006513-RA	0	0.084493	0.120644	OeCa F	Oe	Ca	1	1
Anogam_AGAP006520-RA	0	0.084493	0.120644	OeCa F	Oe	Ca	1	1
Anogam_AGAP006521-RA	0	0.084493	0.120644	OeCa F	Oe	Ca	1	1
Anogam_AGAP006522-RA	0	0.118146	0.120644	OeCa F	Oe	Ca	1	1
Anogam_AGAP006523-RA	0	0.084493	0.120644	OeCa F	Oe	Ca	1	1
Anogam_AGAP006524-RA	0	0.084493	0.120644	OeCa F	Oe	Ca	1	1
Anogam_AGAP006525-RA	0	0.084493	0.120644	OeCa F	Oe	Ca	1	1
Anogam_AGAP006526-RA	0	0.084493	0.120644	OeCa F	Oe	Ca	1	1
Anogam_AGAP006527-RA	0	0.084493	0.120644	OeCa F	Oe	Ca	1	1
Anogam_AGAP006529-RA	0	0.084493	0.120644	OeCa F	Oe	Ca	1	1
Anogam_AGAP013364-RA	0	0.0982054	0.120644	OeCa F	Oe	Ca	1	1
Anogam_AGAP006530-RA	0	0.0917248	0.120644	OeCa F	Oe	Ca	1	1
Anogam_AGAP013488-RA	0	0.109172	0.120644	OeCa F	Oe	Ca	1	1
Anogam_AGAP006531-RA	0	0.111665	0.120644	OeCa F	Oe	Ca	1	1
Anogam_AGAP006534-RB	-0.12437	0.0249252	0.120644	OeCa F	Oe	Ca	0.212034	0.336404
Anogam_AGAP006534-RA	0.12437	0.0264207	0.120644	OeCa F	Oe	Ca	0.787966	0.663596
Anogam_AGAP006542-RA	0	0.084493	0.120644	OeCa F	Oe	Ca	1	1
Anogam_AGAP028608-RA	0	0.0967099	0.120644	OeCa F	Oe	Ca	1	1
Anogam_AGAP006549-RA	0	0.084493	0.120644	OeCa F	Oe	Ca	1	1
Anogam_AGAP006550-RA	0	0.0962114	0.120644	OeCa F	Oe	Ca	1	1
Anogam_AGAP006571-RA	0	0.0937188	0.120644	OeCa F	Oe	Ca	1	1
Anogam_AGAP006573-RA	0	0.0867398	0.120644	OeCa F	Oe	Ca	1	1
Anogam_AGAP006575-RA	0	0.0902293	0.120644	OeCa F	Oe	Ca	1	1
Anogam_AGAP006576-RC	0.0197006	0.0702891	0.120644	OeCa F	Oe	Ca	0.190178	0.170478
Anogam_AGAP006576-RB	-0.0416299	0.0516899	0.120644	OeCa F	Oe	Ca	0.470374	0.512004
Anogam_AGAP006576-RA	0.0219294	0.0762712	0.120644	OeCa F	Oe	Ca	0.339448	0.317518
Anogam_AGAP006577-RA	0	0.0937188	0.120644	OeCa F	Oe	Ca	1	1
Anogam_AGAP006578-RA	0	0.0882353	0.120644	OeCa F	Oe	Ca	1	1
Anogam_AGAP006579-RA	0.40795	0.00198807	0.120644	OeCa F	Oe	Ca	0.637247	0.229297
Anogam_AGAP006579-RB	-0.40795	0.00897308	0.120644	OeCa F	Oe	Ca	0.362753	0.770703
Anogam_AGAP006581-RA	0	0.084493	0.120644	OeCa F	Oe	Ca	1	1
Anogam_AGAP006582-RD	0.25713	0.0154536	0.120644	OeCa F	Oe	Ca	0.25713	0
Anogam_AGAP006582-RA	0.217103	0.0194417	0.120644	OeCa F	Oe	Ca	0.217103	0
Anogam_AGAP006582-RB	0.125316	0.0294118	0.120644	OeCa F	Oe	Ca	0.125316	0
Anogam_AGAP006582-RC	-0.599549	0.000994036	0.120644	OeCa F	Oe	Ca	0.400451	1
Anogam_AGAP006583-RA	0	0.084493	0.120644	OeCa F	Oe	Ca	1	1
Anogam_AGAP006584-RA	0	0.0912263	0.120644	OeCa F	Oe	Ca	1	1
Anogam_AGAP028459-RA	0	0.101196	0.120644	OeCa F	Oe	Ca	1	1
Anogam_AGAP006585-RA	0	0.0962114	0.120644	OeCa F	Oe	Ca	1	1
Anogam_AGAP006586-RA	0	0.0977069	0.120644	OeCa F	Oe	Ca	1	1
Anogam_AGAP006587-RA	0	0.0947159	0.120644	OeCa F	Oe	Ca	1	1
Anogam_AGAP006590-RC	-0.0963529	0.0373878	0.120644	OeCa F	Oe	Ca	0.0590824	0.155435
Anogam_AGAP006590-RD	0.0763779	0.0473579	0.120644	OeCa F	Oe	Ca	0.742103	0.665726
Anogam_AGAP006590-RA	0.0533292	0.0473579	0.120644	OeCa F	Oe	Ca	0.0533292	0
Anogam_AGAP006590-RB	-0.0333543	0.0672981	0.120644	OeCa F	Oe	Ca	0.145485	0.178839
Anogam_AGAP006591-RA	0	0.113161	0.120644	OeCa F	Oe	Ca	1	1
Anogam_AGAP006592-RA	0	0.108175	0.120644	OeCa F	Oe	Ca	1	1
Anogam_AGAP006593-RA	0	0.108674	0.120644	OeCa F	Oe	Ca	1	1
Anogam_AGAP006594-RA	-0.484268	0.000994036	0.120644	OeCa F	Oe	Ca	0.425275	0.909542
Anogam_AGAP006594-RB	0.484268	0.000994036	0.120644	OeCa F	Oe	Ca	0.574725	0.0904576
Anogam_AGAP006597-RA	0	0.117647	0.120644	OeCa F	Oe	Ca	1	1
Anogam_AGAP006599-RA	0	0.0987039	0.120644	OeCa F	Oe	Ca	1	1
Anogam_AGAP006602-RA	0	0.0922233	0.120644	OeCa F	Oe	Ca	1	1
Anogam_AGAP006604-RA	0	0.0922233	0.120644	OeCa F	Oe	Ca	1	1
Anogam_AGAP006606-RA	0	0.084493	0.120644	OeCa F	Oe	Ca	1	1
Anogam_AGAP006607-RA	0.00515164	0.0932203	0.120644	OeCa F	Oe	Ca	1	0.994848
Anogam_AGAP006607-RB	-0.00515164	0.0862413	0.120644	OeCa F	Oe	Ca	0	0.00515164
Anogam_AGAP006612-RA	0	0.105184	0.120644	OeCa F	Oe	Ca	1	1
Anogam_AGAP006614-RA	0	0.0902293	0.120644	OeCa F	Oe	Ca	1	1
Anogam_AGAP006616-RA	0	0.084493	0.120644	OeCa F	Oe	Ca	1	1
Anogam_AGAP006619-RA	0	0.0932203	0.120644	OeCa F	Oe	Ca	1	1
Anogam_AGAP006621-RA	0	0.084493	0.120644	OeCa F	Oe	Ca	1	1
Anogam_AGAP006623-RA	0	0.084493	0.120644	OeCa F	Oe	Ca	1	1
Anogam_AGAP006625-RA	0	0.0937188	0.120644	OeCa F	Oe	Ca	1	1
Anogam_AGAP006627-RA	0	0.084493	0.120644	OeCa F	Oe	Ca	1	1
Anogam_AGAP006631-RA	0	0.084493	0.120644	OeCa F	Oe	Ca	1	1
Anogam_AGAP006633-RA	0.166516	0.0159046	0.120644	OeCa F	Oe	Ca	0.899737	0.733221
Anogam_AGAP006633-RB	-0.166516	0.0159046	0.120644	OeCa F	Oe	Ca	0.100263	0.266779
Anogam_AGAP006634-RA	0	0.084493	0.120644	OeCa F	Oe	Ca	1	1
Anogam_AGAP006638-RA	0	0.084493	0.120644	OeCa F	Oe	Ca	1	1
Anogam_AGAP006644-RA	0	0.084493	0.120644	OeCa F	Oe	Ca	1	1
Anogam_AGAP006649-RA	0	0.084493	0.120644	OeCa F	Oe	Ca	1	1
Anogam_AGAP006651-RA	0	0.084493	0.120644	OeCa F	Oe	Ca	1	1
Anogam_AGAP006656-RB	-0.000320528	0.082505	0.120644	OeCa F	Oe	Ca	0.802602	0.802923
Anogam_AGAP006656-RA	0.000320528	0.0957129	0.120644	OeCa F	Oe	Ca	0.197398	0.197077
Anogam_AGAP006657-RA	0	0.084493	0.120644	OeCa F	Oe	Ca	1	1
Anogam_AGAP006659-RA	0	0.084493	0.120644	OeCa F	Oe	Ca	1	1
Anogam_AGAP006660-RC	0.000936964	0.100698	0.120644	OeCa F	Oe	Ca	0.00254786	0.00161089
Anogam_AGAP006660-RB	0.106449	0.0328032	0.120644	OeCa F	Oe	Ca	0.700336	0.593888
Anogam_AGAP006660-RA	-0.107386	0.0388833	0.120644	OeCa F	Oe	Ca	0.297116	0.404501
Anogam_AGAP006662-RA	0	0.102193	0.120644	OeCa F	Oe	Ca	1	1
Anogam_AGAP006666-RA	0	0.10668	0.120644	OeCa F	Oe	Ca	1	1
Anogam_AGAP006667-RA	0	0.112662	0.120644	OeCa F	Oe	Ca	1	1
Anogam_AGAP006668-RA	0	0.0962114	0.120644	OeCa F	Oe	Ca	1	1
Anogam_AGAP006671-RA	0	0.0997009	0.120644	OeCa F	Oe	Ca	1	1
Anogam_AGAP006672-RA	0	0.0967099	0.120644	OeCa F	Oe	Ca	1	1
Anogam_AGAP006678-RA	0	0.0922233	0.120644	OeCa F	Oe	Ca	1	1
Anogam_AGAP006681-RA	0	0.101196	0.120644	OeCa F	Oe	Ca	1	1
Anogam_AGAP006684-RA	0	0.0982054	0.120644	OeCa F	Oe	Ca	1	1
Anogam_AGAP006687-RA	0	0.108674	0.120644	OeCa F	Oe	Ca	1	1
Anogam_AGAP006689-RA	0	0.118146	0.120644	OeCa F	Oe	Ca	1	1
Anogam_AGAP006691-RA	0	0.115653	0.120644	OeCa F	Oe	Ca	1	1
Anogam_AGAP006696-RA	0	0.100199	0.120644	OeCa F	Oe	Ca	1	1
Anogam_AGAP006698-RA	0	0.0987039	0.120644	OeCa F	Oe	Ca	1	1
Anogam_AGAP006699-RA	0	0.0922233	0.120644	OeCa F	Oe	Ca	1	1
Anogam_AGAP006700-RA	0	0.111665	0.120644	OeCa F	Oe	Ca	1	1
Anogam_AGAP006701-RA	0.0642835	0.051346	0.120644	OeCa F	Oe	Ca	0.521511	0.457228
Anogam_AGAP006701-RB	-0.0671688	0.0418744	0.120644	OeCa F	Oe	Ca	0.399489	0.466657
Anogam_AGAP006701-RC	0.00288533	0.0927218	0.120644	OeCa F	Oe	Ca	0.0790001	0.0761148
Anogam_AGAP006702-RB	-0.167299	0.0209372	0.120644	OeCa F	Oe	Ca	0.432824	0.600123
Anogam_AGAP006702-RA	0.167299	0.0249252	0.120644	OeCa F	Oe	Ca	0.567176	0.399877
Anogam_AGAP006707-RA	0	0.0982054	0.120644	OeCa F	Oe	Ca	1	1
Anogam_AGAP006709-RA	0	0.084493	0.120644	OeCa F	Oe	Ca	1	1
Anogam_AGAP006710-RA	0	0.084493	0.120644	OeCa F	Oe	Ca	1	1
Anogam_AGAP006712-RA	0	0.084493	0.120644	OeCa F	Oe	Ca	1	1
Anogam_AGAP029046-RA	0	0.0937188	0.120644	OeCa F	Oe	Ca	1	1
Anogam_AGAP006714-RA	0	0.0902293	0.120644	OeCa F	Oe	Ca	1	1
Anogam_AGAP006718-RA	0	0.0957129	0.120644	OeCa F	Oe	Ca	1	1
Anogam_AGAP006719-RA	0	0.0907278	0.120644	OeCa F	Oe	Ca	1	1
Anogam_AGAP006721-RB	-0.41846	0.00198807	0.120644	OeCa F	Oe	Ca	0.121031	0.539492
Anogam_AGAP006721-RA	0.41846	0.00198807	0.120644	OeCa F	Oe	Ca	0.878969	0.460508
Anogam_AGAP006723-RA	0	0.084493	0.120644	OeCa F	Oe	Ca	1	1
Anogam_AGAP006724-RA	0	0.084493	0.120644	OeCa F	Oe	Ca	1	1
Anogam_AGAP006725-RA	0	0.0912263	0.120644	OeCa F	Oe	Ca	1	1
Anogam_AGAP006727-RA	0	0.0962114	0.120644	OeCa F	Oe	Ca	1	1
Anogam_AGAP006729-RA	0	0.084493	0.120644	OeCa F	Oe	Ca	1	1
Anogam_AGAP006730-RA	0	0.084493	0.120644	OeCa F	Oe	Ca	1	1
Anogam_AGAP006731-RA	0	0.0947159	0.120644	OeCa F	Oe	Ca	1	1
Anogam_AGAP006734-RA	0	0.100199	0.120644	OeCa F	Oe	Ca	1	1
Anogam_AGAP006735-RA	0	0.0942173	0.120644	OeCa F	Oe	Ca	1	1
Anogam_AGAP028461-RA	0	0.111167	0.120644	OeCa F	Oe	Ca	1	1
Anogam_AGAP028400-RA	0	0.084493	0.120644	OeCa F	Oe	Ca	1	1
Anogam_AGAP006741-RA	0	0.084493	0.120644	OeCa F	Oe	Ca	1	1
Anogam_AGAP006747-RA	0	0.105184	0.120644	OeCa F	Oe	Ca	1	1
Anogam_AGAP006748-RA	0	0.109671	0.120644	OeCa F	Oe	Ca	1	1
Anogam_AGAP029116-RA	0	0.0972084	0.120644	OeCa F	Oe	Ca	1	1
Anogam_AGAP006756-RA	0	0.0872383	0.120644	OeCa F	Oe	Ca	1	1
Anogam_AGAP006759-RA	0	0.100199	0.120644	OeCa F	Oe	Ca	1	1
Anogam_AGAP006760-RA	0	0.11665	0.120644	OeCa F	Oe	Ca	1	1
Anogam_AGAP006761-RA	0	0.115653	0.120644	OeCa F	Oe	Ca	1	1
Anogam_AGAP006763-RA	0	0.084493	0.120644	OeCa F	Oe	Ca	1	1
Anogam_AGAP006765-RA	-0.33561	0.0104686	0.120644	OeCa F	Oe	Ca	0.5	0.83561
Anogam_AGAP006765-RB	0.33561	0.0114656	0.120644	OeCa F	Oe	Ca	0.5	0.16439
Anogam_AGAP006768-RA	0	0.0887338	0.120644	OeCa F	Oe	Ca	1	1
Anogam_AGAP006770-RA	0	0.100698	0.120644	OeCa F	Oe	Ca	1	1
Anogam_AGAP006774-RA	0	0.084493	0.120644	OeCa F	Oe	Ca	1	1
Anogam_AGAP006776-RA	0	0.084493	0.120644	OeCa F	Oe	Ca	1	1
Anogam_AGAP006778-RA	0	0.084493	0.120644	OeCa F	Oe	Ca	1	1
Anogam_AGAP006779-RA	0	0.084493	0.120644	OeCa F	Oe	Ca	1	1
Anogam_AGAP006781-RA	0	0.0987039	0.120644	OeCa F	Oe	Ca	1	1
Anogam_AGAP006782-RA	0	0.10319	0.120644	OeCa F	Oe	Ca	1	1
Anogam_AGAP006784-RA	0	0.084493	0.120644	OeCa F	Oe	Ca	1	1
Anogam_AGAP006789-RA	0.0255192	0.0742772	0.120644	OeCa F	Oe	Ca	0.216613	0.191094
Anogam_AGAP006789-RB	-0.0255192	0.0682951	0.120644	OeCa F	Oe	Ca	0.783387	0.808906
Anogam_AGAP006791-RA	0	0.0882353	0.120644	OeCa F	Oe	Ca	1	1
Anogam_AGAP006792-RA	0	0.0922233	0.120644	OeCa F	Oe	Ca	1	1
Anogam_AGAP006793-RA	0	0.0937188	0.120644	OeCa F	Oe	Ca	1	1
Anogam_AGAP006795-RA	0	0.0982054	0.120644	OeCa F	Oe	Ca	1	1
Anogam_AGAP006796-RA	0	0.084493	0.120644	OeCa F	Oe	Ca	1	1
Anogam_AGAP006797-RA	0	0.102193	0.120644	OeCa F	Oe	Ca	1	1
Anogam_AGAP006799-RA	0	0.101695	0.120644	OeCa F	Oe	Ca	1	1
Anogam_AGAP006802-RA	0	0.0932203	0.120644	OeCa F	Oe	Ca	1	1
Anogam_AGAP006803-RA	0	0.084493	0.120644	OeCa F	Oe	Ca	1	1
Anogam_AGAP006807-RA	0	0.084493	0.120644	OeCa F	Oe	Ca	1	1
Anogam_AGAP006808-RA	0	0.084493	0.120644	OeCa F	Oe	Ca	1	1
Anogam_AGAP006809-RA	0	0.0907278	0.120644	OeCa F	Oe	Ca	1	1
Anogam_AGAP006811-RA	0	0.105184	0.120644	OeCa F	Oe	Ca	1	1
Anogam_AGAP006814-RA	0	0.0927218	0.120644	OeCa F	Oe	Ca	1	1
Anogam_AGAP006817-RA	0	0.113659	0.120644	OeCa F	Oe	Ca	1	1
Anogam_AGAP006824-RA	0	0.105184	0.120644	OeCa F	Oe	Ca	1	1
Anogam_AGAP006826-RA	0	0.084493	0.120644	OeCa F	Oe	Ca	1	1
Anogam_AGAP006827-RA	0	0.0952144	0.120644	OeCa F	Oe	Ca	1	1
Anogam_AGAP006871-RA	0	0.103689	0.120644	OeCa F	Oe	Ca	1	1
Anogam_AGAP006873-RA	0	0.0957129	0.120644	OeCa F	Oe	Ca	1	1
Anogam_AGAP006878-RA	0	0.084493	0.120644	OeCa F	Oe	Ca	1	1
Anogam_AGAP006881-RA	0	0.084493	0.120644	OeCa F	Oe	Ca	1	1
Anogam_AGAP006882-RA	0	0.084493	0.120644	OeCa F	Oe	Ca	1	1
Anogam_AGAP006884-RA	0	0.084493	0.120644	OeCa F	Oe	Ca	1	1
Anogam_AGAP006888-RA	0	0.084493	0.120644	OeCa F	Oe	Ca	1	1
Anogam_AGAP029136-RA	0	0.084493	0.120644	OeCa F	Oe	Ca	1	1
Anogam_AGAP029142-RA	0	0.084493	0.120644	OeCa F	Oe	Ca	1	1
Anogam_AGAP029137-RA	0	0.084493	0.120644	OeCa F	Oe	Ca	1	1
Anogam_AGAP006894-RA	0	0.104686	0.120644	OeCa F	Oe	Ca	1	1
Anogam_AGAP006896-RA	0	0.117149	0.120644	OeCa F	Oe	Ca	1	1
Anogam_AGAP006898-RA	0	0.0932203	0.120644	OeCa F	Oe	Ca	1	1
Anogam_AGAP029171-RA	0	0.0992024	0.120644	OeCa F	Oe	Ca	1	1
Anogam_AGAP006900-RA	0	0.114656	0.120644	OeCa F	Oe	Ca	1	1
Anogam_AGAP006901-RC	0.173297	0.0179462	0.120644	OeCa F	Oe	Ca	0.433868	0.260571
Anogam_AGAP006901-RA	0.0214356	0.0616302	0.120644	OeCa F	Oe	Ca	0.0387563	0.0173207
Anogam_AGAP006901-RB	-0.194733	0.0159521	0.120644	OeCa F	Oe	Ca	0.527375	0.722109
Anogam_AGAP006908-RA	0	0.0972084	0.120644	OeCa F	Oe	Ca	1	1
Anogam_AGAP006913-RA	0	0.102692	0.120644	OeCa F	Oe	Ca	1	1
Anogam_AGAP006917-RA	0	0.0972084	0.120644	OeCa F	Oe	Ca	1	1
Anogam_AGAP006918-RA	0	0.0932203	0.120644	OeCa F	Oe	Ca	1	1
Anogam_AGAP006923-RA	0	0.084493	0.120644	OeCa F	Oe	Ca	1	1
Anogam_AGAP006924-RA	0	0.100698	0.120644	OeCa F	Oe	Ca	1	1
Anogam_AGAP006925-RA	0	0.0962114	0.120644	OeCa F	Oe	Ca	1	1
Anogam_AGAP006926-RA	0	0.084493	0.120644	OeCa F	Oe	Ca	1	1
Anogam_AGAP006927-RA	0	0.100698	0.120644	OeCa F	Oe	Ca	1	1
Anogam_AGAP006928-RA	0	0.100698	0.120644	OeCa F	Oe	Ca	1	1
Anogam_AGAP006929-RA	0	0.084493	0.120644	OeCa F	Oe	Ca	1	1
Anogam_AGAP006932-RA	0	0.0957129	0.120644	OeCa F	Oe	Ca	1	1
Anogam_AGAP006934-RA	0	0.0882353	0.120644	OeCa F	Oe	Ca	1	1
Anogam_AGAP006935-RB	-0.00575943	0.0802592	0.120644	OeCa F	Oe	Ca	0	0.00575943
Anogam_AGAP006935-RC	-0.148466	0.0224327	0.120644	OeCa F	Oe	Ca	0.121616	0.270082
Anogam_AGAP006935-RA	0.154225	0.0209372	0.120644	OeCa F	Oe	Ca	0.878384	0.724158
Anogam_AGAP006937-RA	-0.010519	0.0907278	0.120644	OeCa F	Oe	Ca	0.05142	0.061939
Anogam_AGAP006937-RB	0.00832639	0.0792622	0.120644	OeCa F	Oe	Ca	0.556224	0.547898
Anogam_AGAP006937-RC	0.00219257	0.0957129	0.120644	OeCa F	Oe	Ca	0.392356	0.390163
Anogam_AGAP006938-RA	0	0.0982054	0.120644	OeCa F	Oe	Ca	1	1
Anogam_AGAP006940-RA	0	0.101196	0.120644	OeCa F	Oe	Ca	1	1
Anogam_AGAP006941-RA	0	0.0997009	0.120644	OeCa F	Oe	Ca	1	1
Anogam_AGAP006943-RA	0	0.102692	0.120644	OeCa F	Oe	Ca	1	1
Anogam_AGAP006946-RA	0	0.084493	0.120644	OeCa F	Oe	Ca	1	1
Anogam_AGAP006948-RB	-0.159907	0.0244267	0.120644	OeCa F	Oe	Ca	0.305422	0.465329
Anogam_AGAP006948-RA	0.159907	0.0259222	0.120644	OeCa F	Oe	Ca	0.694578	0.534671
Anogam_AGAP006949-RA	0	0.101695	0.120644	OeCa F	Oe	Ca	1	1
Anogam_AGAP006953-RA	0	0.105184	0.120644	OeCa F	Oe	Ca	1	1
Anogam_AGAP006954-RA	0	0.084493	0.120644	OeCa F	Oe	Ca	1	1
Anogam_AGAP006954-RB	0	0.11665	0.120644	OeCa F	Oe	Ca	0	0
Anogam_AGAP006954-RC	0	0.084493	0.120644	OeCa F	Oe	Ca	0	0
Anogam_AGAP006955-RA	0	0.109172	0.120644	OeCa F	Oe	Ca	1	1
Anogam_AGAP006958-RA	0	0.105683	0.120644	OeCa F	Oe	Ca	1	1
Anogam_AGAP006963-RA	0	0.084493	0.120644	OeCa F	Oe	Ca	1	1
Anogam_AGAP006964-RA	0	0.100698	0.120644	OeCa F	Oe	Ca	1	1
Anogam_AGAP006967-RA	0	0.106181	0.120644	OeCa F	Oe	Ca	1	1
Anogam_AGAP006974-RA	0	0.0952144	0.120644	OeCa F	Oe	Ca	1	1
Anogam_AGAP006975-RA	0	0.101695	0.120644	OeCa F	Oe	Ca	1	1
Anogam_AGAP006978-RA	0	0.084493	0.120644	OeCa F	Oe	Ca	1	1
Anogam_AGAP006987-RA	0	0.0997009	0.120644	OeCa F	Oe	Ca	1	1
Anogam_AGAP006988-RA	0	0.0987039	0.120644	OeCa F	Oe	Ca	1	1
Anogam_AGAP006989-RA	0	0.10319	0.120644	OeCa F	Oe	Ca	1	1
Anogam_AGAP006991-RA	0	0.0857428	0.120644	OeCa F	Oe	Ca	1	1
Anogam_AGAP006992-RA	0	0.0982054	0.120644	OeCa F	Oe	Ca	1	1
Anogam_AGAP006994-RB	-0.0458491	0.0477137	0.120644	OeCa F	Oe	Ca	0.231845	0.277694
Anogam_AGAP006994-RA	0.0458491	0.0477137	0.120644	OeCa F	Oe	Ca	0.768155	0.722306
Anogam_AGAP006995-RA	0	0.0932203	0.120644	OeCa F	Oe	Ca	1	1
Anogam_AGAP006997-RA	0	0.0992024	0.120644	OeCa F	Oe	Ca	1	1
Anogam_AGAP007000-RA	0	0.100199	0.120644	OeCa F	Oe	Ca	1	1
Anogam_AGAP007002-RA	0	0.109172	0.120644	OeCa F	Oe	Ca	1	1
Anogam_AGAP007003-RA	0	0.103689	0.120644	OeCa F	Oe	Ca	1	1
Anogam_AGAP007006-RB	0.0279576	0.0737787	0.120644	OeCa F	Oe	Ca	0.831709	0.803752
Anogam_AGAP007006-RA	0.0186921	0.0822532	0.120644	OeCa F	Oe	Ca	0.0958993	0.0772072
Anogam_AGAP007006-RC	-0.0466497	0.0692921	0.120644	OeCa F	Oe	Ca	0.0723915	0.119041
Anogam_AGAP007007-RA	0	0.107677	0.120644	OeCa F	Oe	Ca	1	1
Anogam_AGAP007008-RA	0	0.084493	0.120644	OeCa F	Oe	Ca	1	1
Anogam_AGAP007012-RB	-0.00735564	0.0832502	0.120644	OeCa F	Oe	Ca	0.602047	0.609403
Anogam_AGAP007012-RA	0.00735564	0.0852443	0.120644	OeCa F	Oe	Ca	0.397953	0.390597
Anogam_AGAP007018-RA	0	0.0962114	0.120644	OeCa F	Oe	Ca	1	1
Anogam_AGAP007020-RA	0	0.107677	0.120644	OeCa F	Oe	Ca	1	1
Anogam_AGAP007022-RA	0	0.108674	0.120644	OeCa F	Oe	Ca	1	1
Anogam_AGAP007023-RA	0	0.0907278	0.120644	OeCa F	Oe	Ca	1	1
Anogam_AGAP007026-RA	0	0.10668	0.120644	OeCa F	Oe	Ca	1	1
Anogam_AGAP007027-RA	0	0.109172	0.120644	OeCa F	Oe	Ca	1	1
Anogam_AGAP007028-RA	0	0.084493	0.120644	OeCa F	Oe	Ca	1	1
Anogam_AGAP028463-RA	0	0.112164	0.120644	OeCa F	Oe	Ca	1	1
Anogam_AGAP007031-RA	0	0.0917248	0.120644	OeCa F	Oe	Ca	1	1
Anogam_AGAP007033-RA	0	0.115155	0.120644	OeCa F	Oe	Ca	1	1
Anogam_AGAP007034-RA	0	0.084493	0.120644	OeCa F	Oe	Ca	1	1
Anogam_AGAP007035-RA	0	0.107178	0.120644	OeCa F	Oe	Ca	1	1
Anogam_AGAP007036-RA	0	0.108674	0.120644	OeCa F	Oe	Ca	1	1
Anogam_AGAP007037-RA	0	0.113659	0.120644	OeCa F	Oe	Ca	1	1
Anogam_AGAP007038-RA	0	0.0952144	0.120644	OeCa F	Oe	Ca	1	1
Anogam_AGAP007043-RB	-0.0307836	0.0752742	0.120644	OeCa F	Oe	Ca	0.667762	0.698546
Anogam_AGAP007043-RA	0.0307836	0.0608175	0.120644	OeCa F	Oe	Ca	0.332238	0.301454
Anogam_AGAP007044-RA	0	0.084493	0.120644	OeCa F	Oe	Ca	1	1
Anogam_AGAP007046-RA	0	0.084493	0.120644	OeCa F	Oe	Ca	1	1
Anogam_AGAP007049-RA	0	0.084493	0.120644	OeCa F	Oe	Ca	1	1
Anogam_AGAP007050-RA	0	0.103689	0.120644	OeCa F	Oe	Ca	1	1
Anogam_AGAP007051-RA	0	0.084493	0.120644	OeCa F	Oe	Ca	1	1
Anogam_AGAP007054-RA	0	0.117149	0.120644	OeCa F	Oe	Ca	1	1
Anogam_AGAP007055-RA	0	0.0902293	0.120644	OeCa F	Oe	Ca	1	1
Anogam_AGAP007057-RA	0	0.0887338	0.120644	OeCa F	Oe	Ca	1	1
Anogam_AGAP007058-RA	0	0.084493	0.120644	OeCa F	Oe	Ca	1	1
Anogam_AGAP007060-RA	0	0.084493	0.120644	OeCa F	Oe	Ca	1	1
Anogam_AGAP007062-RA	0	0.100698	0.120644	OeCa F	Oe	Ca	1	1
Anogam_AGAP007063-RA	0	0.100698	0.120644	OeCa F	Oe	Ca	1	1
Anogam_AGAP007065-RA	0	0.117647	0.120644	OeCa F	Oe	Ca	1	1
Anogam_AGAP007066-RA	0	0.107178	0.120644	OeCa F	Oe	Ca	1	1
Anogam_AGAP007069-RA	0	0.0967099	0.120644	OeCa F	Oe	Ca	1	1
Anogam_AGAP007072-RA	0	0.0932203	0.120644	OeCa F	Oe	Ca	1	1
Anogam_AGAP007073-RA	0	0.0917248	0.120644	OeCa F	Oe	Ca	1	1
Anogam_AGAP007075-RA	0	0.104187	0.120644	OeCa F	Oe	Ca	1	1
Anogam_AGAP007078-RA	0	0.108674	0.120644	OeCa F	Oe	Ca	1	1
Anogam_AGAP007080-RA	0	0.107677	0.120644	OeCa F	Oe	Ca	1	1
Anogam_AGAP007083-RA	0	0.102193	0.120644	OeCa F	Oe	Ca	1	1
Anogam_AGAP007087-RA	0	0.104686	0.120644	OeCa F	Oe	Ca	1	1
Anogam_AGAP007088-RA	0	0.102692	0.120644	OeCa F	Oe	Ca	1	1
Anogam_AGAP007093-RA	0	0.102692	0.120644	OeCa F	Oe	Ca	1	1
Anogam_AGAP007094-RA	0	0.0922233	0.120644	OeCa F	Oe	Ca	1	1
Anogam_AGAP007096-RA	0	0.0897308	0.120644	OeCa F	Oe	Ca	1	1
Anogam_AGAP007104-RA	0	0.0942173	0.120644	OeCa F	Oe	Ca	1	1
Anogam_AGAP007106-RA	0	0.0937188	0.120644	OeCa F	Oe	Ca	1	1
Anogam_AGAP007109-RA	0	0.0947159	0.120644	OeCa F	Oe	Ca	1	1
Anogam_AGAP007112-RA	0	0.084493	0.120644	OeCa F	Oe	Ca	1	1
Anogam_AGAP007114-RA	0	0.110668	0.120644	OeCa F	Oe	Ca	1	1
Anogam_AGAP007118-RA	0	0.104686	0.120644	OeCa F	Oe	Ca	1	1
Anogam_AGAP007119-RA	0	0.0947159	0.120644	OeCa F	Oe	Ca	1	1
Anogam_AGAP007122-RA	0	0.084493	0.120644	OeCa F	Oe	Ca	1	1
Anogam_AGAP007126-RA	0	0.084493	0.120644	OeCa F	Oe	Ca	1	1
Anogam_AGAP007127-RA	0	0.104187	0.120644	OeCa F	Oe	Ca	1	1
Anogam_AGAP007129-RA	0	0.108175	0.120644	OeCa F	Oe	Ca	1	1
Anogam_AGAP007130-RA	0	0.106181	0.120644	OeCa F	Oe	Ca	1	1
Anogam_AGAP007135-RA	0	0.114656	0.120644	OeCa F	Oe	Ca	1	1
Anogam_AGAP007143-RA	0	0.0957129	0.120644	OeCa F	Oe	Ca	1	1
Anogam_AGAP007146-RA	0	0.104686	0.120644	OeCa F	Oe	Ca	1	1
Anogam_AGAP007148-RA	0	0.107677	0.120644	OeCa F	Oe	Ca	1	1
Anogam_AGAP007157-RA	0	0.0917248	0.120644	OeCa F	Oe	Ca	1	1
Anogam_AGAP007159-RA	0	0.101695	0.120644	OeCa F	Oe	Ca	1	1
Anogam_AGAP007160-RA	0	0.108674	0.120644	OeCa F	Oe	Ca	0	0
Anogam_AGAP007160-RB	-0.486466	0.00847458	0.120644	OeCa F	Oe	Ca	0.225805	0.712271
Anogam_AGAP007160-RC	0.479576	0.00697906	0.120644	OeCa F	Oe	Ca	0.757427	0.277851
Anogam_AGAP007160-RD	0.00688945	0.0862413	0.120644	OeCa F	Oe	Ca	0.0167681	0.00987861
Anogam_AGAP007162-RA	0.0455802	0.050349	0.120644	OeCa F	Oe	Ca	0.105593	0.0600129
Anogam_AGAP007162-RB	-0.0455802	0.0477137	0.120644	OeCa F	Oe	Ca	0.894407	0.939987
Anogam_AGAP007163-RB	0.0572616	0.0447316	0.120644	OeCa F	Oe	Ca	0.0572616	0
Anogam_AGAP007163-RA	-0.0572616	0.0498504	0.120644	OeCa F	Oe	Ca	0.942738	1
Anogam_AGAP007165-RA	0	0.084493	0.120644	OeCa F	Oe	Ca	1	1
Anogam_AGAP007166-RA	0	0.0922233	0.120644	OeCa F	Oe	Ca	1	1
Anogam_AGAP007167-RA	0	0.084493	0.120644	OeCa F	Oe	Ca	1	1
Anogam_AGAP007168-RA	0	0.104187	0.120644	OeCa F	Oe	Ca	1	1
Anogam_AGAP007173-RA	0	0.102692	0.120644	OeCa F	Oe	Ca	1	1
Anogam_AGAP007176-RA	0	0.084493	0.120644	OeCa F	Oe	Ca	1	1
Anogam_AGAP007181-RA	0.0915749	0.0357853	0.120644	OeCa F	Oe	Ca	0.653817	0.562242
Anogam_AGAP007181-RB	-0.0915749	0.0448654	0.120644	OeCa F	Oe	Ca	0.346183	0.437758
Anogam_AGAP007184-RA	0	0.0977069	0.120644	OeCa F	Oe	Ca	1	1
Anogam_AGAP007185-RA	0	0.118146	0.120644	OeCa F	Oe	Ca	1	1
Anogam_AGAP007186-RA	0	0.0912263	0.120644	OeCa F	Oe	Ca	1	1
Anogam_AGAP007195-RA	0	0.105184	0.120644	OeCa F	Oe	Ca	1	1
Anogam_AGAP007198-RB	0.125028	0.0299103	0.120644	OeCa F	Oe	Ca	0.691326	0.566298
Anogam_AGAP007198-RA	-0.125028	0.0209372	0.120644	OeCa F	Oe	Ca	0.308674	0.433702
Anogam_AGAP007202-RA	0	0.114656	0.120644	OeCa F	Oe	Ca	1	1
Anogam_AGAP007206-RA	0	0.106181	0.120644	OeCa F	Oe	Ca	1	1
Anogam_AGAP007208-RA	0	0.0917248	0.120644	OeCa F	Oe	Ca	1	1
Anogam_AGAP007209-RB	-0.000670331	0.100199	0.120644	OeCa F	Oe	Ca	0.0019072	0.00257753
Anogam_AGAP007209-RD	0.0301505	0.055666	0.120644	OeCa F	Oe	Ca	0.916121	0.885971
Anogam_AGAP007209-RA	0.00561055	0.0725646	0.120644	OeCa F	Oe	Ca	0.0793702	0.0737597
Anogam_AGAP007209-RC	0	0.084493	0.120644	OeCa F	Oe	Ca	0	0
Anogam_AGAP007209-RE	-0.0350907	0.0536779	0.120644	OeCa F	Oe	Ca	0.00260154	0.0376922
Anogam_AGAP007210-RA	0	0.104187	0.120644	OeCa F	Oe	Ca	1	1
Anogam_AGAP007212-RA	0	0.105683	0.120644	OeCa F	Oe	Ca	1	1
Anogam_AGAP007214-RA	0	0.109172	0.120644	OeCa F	Oe	Ca	1	1
Anogam_AGAP007215-RA	0	0.084493	0.120644	OeCa F	Oe	Ca	1	1
Anogam_AGAP007216-RA	0	0.0952144	0.120644	OeCa F	Oe	Ca	1	1
Anogam_AGAP007219-RA	0	0.105683	0.120644	OeCa F	Oe	Ca	1	1
Anogam_AGAP029058-RA	0	0.108674	0.120644	OeCa F	Oe	Ca	1	1
Anogam_AGAP007238-RA	0	0.105184	0.120644	OeCa F	Oe	Ca	1	1
Anogam_AGAP007240-RA	0	0.105683	0.120644	OeCa F	Oe	Ca	1	1
Anogam_AGAP007242-RA	0.135292	0.0238569	0.120644	OeCa F	Oe	Ca	0.751298	0.616006
Anogam_AGAP007242-RB	-0.135292	0.0289133	0.120644	OeCa F	Oe	Ca	0.248702	0.383994
Anogam_AGAP007243-RA	0	0.0997009	0.120644	OeCa F	Oe	Ca	1	1
Anogam_AGAP007244-RA	0	0.100698	0.120644	OeCa F	Oe	Ca	1	1
Anogam_AGAP007246-RA	0	0.0917248	0.120644	OeCa F	Oe	Ca	1	1
Anogam_AGAP007249-RB	-0.34728	0.00697906	0.120644	OeCa F	Oe	Ca	0.549691	0.896972
Anogam_AGAP007249-RA	0.34728	0.00448654	0.120644	OeCa F	Oe	Ca	0.450309	0.103028
Anogam_AGAP007250-RB	0.261238	0.0114656	0.120644	OeCa F	Oe	Ca	0.378195	0.116957
Anogam_AGAP007250-RA	0.0720958	0.055334	0.120644	OeCa F	Oe	Ca	0.621805	0.549709
Anogam_AGAP007250-RC	-0.333333	0.00498504	0.120644	OeCa F	Oe	Ca	0	0.333333
Anogam_AGAP007251-RA	0	0.0872383	0.120644	OeCa F	Oe	Ca	1	1
Anogam_AGAP007253-RB	-0.072746	0.0388833	0.120644	OeCa F	Oe	Ca	0.864717	0.937463
Anogam_AGAP007253-RA	0.072746	0.0498504	0.120644	OeCa F	Oe	Ca	0.135283	0.0625374
Anogam_AGAP007254-RA	0	0.0957129	0.120644	OeCa F	Oe	Ca	1	1
Anogam_AGAP007257-RA	0	0.0952144	0.120644	OeCa F	Oe	Ca	1	1
Anogam_AGAP007258-RA	0	0.103689	0.120644	OeCa F	Oe	Ca	1	1
Anogam_AGAP007262-RA	0	0.109671	0.120644	OeCa F	Oe	Ca	1	1
Anogam_AGAP007264-RA	0	0.101695	0.120644	OeCa F	Oe	Ca	1	1
Anogam_AGAP007266-RA	0	0.10668	0.120644	OeCa F	Oe	Ca	1	1
Anogam_AGAP007282-RA	0	0.100698	0.120644	OeCa F	Oe	Ca	1	1
Anogam_AGAP007283-RA	0	0.10319	0.120644	OeCa F	Oe	Ca	1	1
Anogam_AGAP007284-RA	0	0.0942173	0.120644	OeCa F	Oe	Ca	1	1
Anogam_AGAP007291-RA	0	0.084493	0.120644	OeCa F	Oe	Ca	1	1
Anogam_AGAP007292-RA	0	0.10668	0.120644	OeCa F	Oe	Ca	1	1
Anogam_AGAP007293-RA	0	0.104187	0.120644	OeCa F	Oe	Ca	1	1
Anogam_AGAP007294-RA	0	0.0882353	0.120644	OeCa F	Oe	Ca	1	1
Anogam_AGAP007295-RA	0	0.0932203	0.120644	OeCa F	Oe	Ca	1	1
Anogam_AGAP007297-RA	0	0.109172	0.120644	OeCa F	Oe	Ca	1	1
Anogam_AGAP007299-RA	0	0.114158	0.120644	OeCa F	Oe	Ca	1	1
Anogam_AGAP007300-RA	0	0.10668	0.120644	OeCa F	Oe	Ca	1	1
Anogam_AGAP007302-RA	0	0.101695	0.120644	OeCa F	Oe	Ca	1	1
Anogam_AGAP007303-RA	0	0.103689	0.120644	OeCa F	Oe	Ca	1	1
Anogam_AGAP007304-RA	0	0.084493	0.120644	OeCa F	Oe	Ca	1	1
Anogam_AGAP007305-RA	0	0.0987039	0.120644	OeCa F	Oe	Ca	1	1
Anogam_AGAP007306-RA	0	0.084493	0.120644	OeCa F	Oe	Ca	1	1
Anogam_AGAP007308-RA	0	0.0917248	0.120644	OeCa F	Oe	Ca	1	1
Anogam_AGAP007313-RA	0	0.106181	0.120644	OeCa F	Oe	Ca	1	1
Anogam_AGAP007317-RA	0	0.107677	0.120644	OeCa F	Oe	Ca	1	1
Anogam_AGAP007318-RA	0	0.0912263	0.120644	OeCa F	Oe	Ca	1	1
Anogam_AGAP007319-RA	0	0.102692	0.120644	OeCa F	Oe	Ca	1	1
Anogam_AGAP007320-RA	0	0.107677	0.120644	OeCa F	Oe	Ca	1	1
Anogam_AGAP007321-RA	0	0.084493	0.120644	OeCa F	Oe	Ca	1	1
Anogam_AGAP007322-RA	0	0.105683	0.120644	OeCa F	Oe	Ca	1	1
Anogam_AGAP007323-RA	0	0.102193	0.120644	OeCa F	Oe	Ca	1	1
Anogam_AGAP007325-RA	0.0546355	0.0467197	0.120644	OeCa F	Oe	Ca	0.453745	0.399109
Anogam_AGAP007325-RB	-0.0546355	0.0467197	0.120644	OeCa F	Oe	Ca	0.546255	0.600891
Anogam_AGAP007326-RA	-0.0955441	0.0423729	0.120644	OeCa F	Oe	Ca	0	0.0955441
Anogam_AGAP007326-RB	0.0955441	0.0368893	0.120644	OeCa F	Oe	Ca	1	0.904456
Anogam_AGAP007335-RA	0	0.0992024	0.120644	OeCa F	Oe	Ca	1	1
Anogam_AGAP007339-RA	0	0.10319	0.120644	OeCa F	Oe	Ca	1	1
Anogam_AGAP028466-RA	0	0.0957129	0.120644	OeCa F	Oe	Ca	1	1
Anogam_AGAP007342-RA	0	0.110169	0.120644	OeCa F	Oe	Ca	1	1
Anogam_AGAP007343-RA	0	0.084493	0.120644	OeCa F	Oe	Ca	1	1
Anogam_AGAP007344-RA	0	0.0897308	0.120644	OeCa F	Oe	Ca	1	1
Anogam_AGAP007345-RA	0	0.084493	0.120644	OeCa F	Oe	Ca	1	1
Anogam_AGAP007346-RA	0	0.105683	0.120644	OeCa F	Oe	Ca	1	1
Anogam_AGAP007347-RA	0	0.114158	0.120644	OeCa F	Oe	Ca	1	1
Anogam_AGAP007349-RA	0	0.104686	0.120644	OeCa F	Oe	Ca	1	1
Anogam_AGAP007353-RA	0	0.10668	0.120644	OeCa F	Oe	Ca	1	1
Anogam_AGAP007359-RA	0	0.100199	0.120644	OeCa F	Oe	Ca	1	1
Anogam_AGAP007362-RA	0.0282727	0.0762712	0.120644	OeCa F	Oe	Ca	0.249449	0.221176
Anogam_AGAP007362-RB	-0.0282727	0.05666	0.120644	OeCa F	Oe	Ca	0.750551	0.778824
Anogam_AGAP007366-RB	0.0162647	0.0832502	0.120644	OeCa F	Oe	Ca	0.359541	0.343276
Anogam_AGAP007366-RA	-0.0162647	0.0887338	0.120644	OeCa F	Oe	Ca	0.640459	0.656724
Anogam_AGAP007369-RA	0	0.102692	0.120644	OeCa F	Oe	Ca	1	1
Anogam_AGAP007373-RB	0.0410871	0.055334	0.120644	OeCa F	Oe	Ca	0.163972	0.122885
Anogam_AGAP007373-RA	-0.0410871	0.057328	0.120644	OeCa F	Oe	Ca	0.836028	0.877115
Anogam_AGAP007374-RA	0	0.084493	0.120644	OeCa F	Oe	Ca	1	1
Anogam_AGAP007375-RA	0	0.0952144	0.120644	OeCa F	Oe	Ca	1	1
Anogam_AGAP007377-RA	0	0.105683	0.120644	OeCa F	Oe	Ca	1	1
Anogam_AGAP007379-RA	0	0.102692	0.120644	OeCa F	Oe	Ca	1	1
Anogam_AGAP007380-RA	0	0.10319	0.120644	OeCa F	Oe	Ca	1	1
Anogam_AGAP007381-RA	0	0.104187	0.120644	OeCa F	Oe	Ca	1	1
Anogam_AGAP007384-RA	0	0.112164	0.120644	OeCa F	Oe	Ca	1	1
Anogam_AGAP007387-RA	0	0.115653	0.120644	OeCa F	Oe	Ca	1	1
Anogam_AGAP007388-RA	0	0.100199	0.120644	OeCa F	Oe	Ca	1	1
Anogam_AGAP007390-RA	0	0.0977069	0.120644	OeCa F	Oe	Ca	1	1
Anogam_AGAP007392-RA	0	0.0977069	0.120644	OeCa F	Oe	Ca	1	1
Anogam_AGAP007394-RA	0	0.106181	0.120644	OeCa F	Oe	Ca	1	1
Anogam_AGAP007397-RA	0	0.111665	0.120644	OeCa F	Oe	Ca	1	1
Anogam_AGAP007398-RA	0	0.0997009	0.120644	OeCa F	Oe	Ca	1	1
Anogam_AGAP007400-RA	0	0.110169	0.120644	OeCa F	Oe	Ca	1	1
Anogam_AGAP007401-RA	-0.362861	0.00497018	0.120644	OeCa F	Oe	Ca	0.513649	0.876509
Anogam_AGAP007401-RB	0.362861	0.00497018	0.120644	OeCa F	Oe	Ca	0.486351	0.123491
Anogam_AGAP007402-RA	0	0.109172	0.120644	OeCa F	Oe	Ca	1	1
Anogam_AGAP007413-RA	0	0.0922233	0.120644	OeCa F	Oe	Ca	1	1
Anogam_AGAP007418-RA	0	0.104686	0.120644	OeCa F	Oe	Ca	1	1
Anogam_AGAP007422-RA	0	0.111167	0.120644	OeCa F	Oe	Ca	1	1
Anogam_AGAP007422-RB	0	0.110668	0.120644	OeCa F	Oe	Ca	0	0
Anogam_AGAP007440-RA	0	0.084493	0.120644	OeCa F	Oe	Ca	1	1
Anogam_AGAP007443-RA	0	0.084493	0.120644	OeCa F	Oe	Ca	1	1
Anogam_AGAP007450-RA	0	0.084493	0.120644	OeCa F	Oe	Ca	1	1
Anogam_AGAP007452-RB	0.187709	0.0129225	0.120644	OeCa F	Oe	Ca	0.927422	0.739713
Anogam_AGAP007452-RA	-0.187709	0.0219342	0.120644	OeCa F	Oe	Ca	0.0725775	0.260287
Anogam_AGAP007454-RA	0	0.0932203	0.120644	OeCa F	Oe	Ca	1	1
Anogam_AGAP007457-RA	0	0.084493	0.120644	OeCa F	Oe	Ca	1	1
Anogam_AGAP007461-RA	0	0.0992024	0.120644	OeCa F	Oe	Ca	1	1
Anogam_AGAP007473-RA	0	0.0917248	0.120644	OeCa F	Oe	Ca	1	1
Anogam_AGAP007474-RA	0	0.0957129	0.120644	OeCa F	Oe	Ca	1	1
Anogam_AGAP007476-RA	0	0.103689	0.120644	OeCa F	Oe	Ca	1	1
Anogam_AGAP007477-RA	0	0.0907278	0.120644	OeCa F	Oe	Ca	1	1
Anogam_AGAP007479-RA	0	0.10319	0.120644	OeCa F	Oe	Ca	1	1
Anogam_AGAP007483-RA	0	0.084493	0.120644	OeCa F	Oe	Ca	1	1
Anogam_AGAP007489-RA	0.163399	0.0184447	0.120644	OeCa F	Oe	Ca	0.597763	0.434364
Anogam_AGAP007489-RB	-0.163399	0.0279163	0.120644	OeCa F	Oe	Ca	0.402237	0.565636
Anogam_AGAP007492-RA	0	0.10668	0.120644	OeCa F	Oe	Ca	1	1
Anogam_AGAP007497-RA	0	0.0992024	0.120644	OeCa F	Oe	Ca	1	1
Anogam_AGAP007499-RA	0	0.108674	0.120644	OeCa F	Oe	Ca	1	1
Anogam_AGAP007502-RA	0	0.084493	0.120644	OeCa F	Oe	Ca	1	1
Anogam_AGAP007504-RA	0	0.106181	0.120644	OeCa F	Oe	Ca	1	1
Anogam_AGAP007506-RA	0	0.0942173	0.120644	OeCa F	Oe	Ca	1	1
Anogam_AGAP007510-RA	0	0.105683	0.120644	OeCa F	Oe	Ca	1	1
Anogam_AGAP007514-RA	0	0.084493	0.120644	OeCa F	Oe	Ca	1	1
Anogam_AGAP007515-RA	0	0.084493	0.120644	OeCa F	Oe	Ca	1	1
Anogam_AGAP007516-RA	0	0.084493	0.120644	OeCa F	Oe	Ca	1	1
Anogam_AGAP007517-RA	0	0.084493	0.120644	OeCa F	Oe	Ca	1	1
Anogam_AGAP007518-RA	0	0.101695	0.120644	OeCa F	Oe	Ca	1	1
Anogam_AGAP007519-RA	0	0.084493	0.120644	OeCa F	Oe	Ca	1	1
Anogam_AGAP007521-RA	0	0.104686	0.120644	OeCa F	Oe	Ca	1	1
Anogam_AGAP007521-RB	0	0.0952144	0.120644	OeCa F	Oe	Ca	0	0
Anogam_AGAP007524-RA	0	0.0977069	0.120644	OeCa F	Oe	Ca	1	1
Anogam_AGAP007529-RA	0	0.084493	0.120644	OeCa F	Oe	Ca	1	1
Anogam_AGAP007530-RA	0	0.102692	0.120644	OeCa F	Oe	Ca	1	1
Anogam_AGAP007532-RA	0	0.084493	0.120644	OeCa F	Oe	Ca	1	1
Anogam_AGAP013228-RA	0	0.084493	0.120644	OeCa F	Oe	Ca	1	1
Anogam_AGAP007534-RC	-0.121463	0.026839	0.120644	OeCa F	Oe	Ca	0.273887	0.39535
Anogam_AGAP007534-RA	-0.107706	0.0318091	0.120644	OeCa F	Oe	Ca	0.202216	0.309922
Anogam_AGAP007534-RB	0.229169	0.0109344	0.120644	OeCa F	Oe	Ca	0.523898	0.294728
Anogam_AGAP007540-RA	0	0.104187	0.120644	OeCa F	Oe	Ca	1	1
Anogam_AGAP007541-RA	0	0.102193	0.120644	OeCa F	Oe	Ca	1	1
Anogam_AGAP007542-RA	0	0.0957129	0.120644	OeCa F	Oe	Ca	1	1
Anogam_AGAP007547-RA	0	0.104187	0.120644	OeCa F	Oe	Ca	1	1
Anogam_AGAP007548-RA	-0.271376	0.0109671	0.120644	OeCa F	Oe	Ca	0.35927	0.630647
Anogam_AGAP007548-RB	0.271376	0.0124626	0.120644	OeCa F	Oe	Ca	0.64073	0.369353
Anogam_AGAP007551-RA	0	0.106181	0.120644	OeCa F	Oe	Ca	1	1
Anogam_AGAP007556-RA	0	0.100698	0.120644	OeCa F	Oe	Ca	1	1
Anogam_AGAP007557-RA	0	0.0982054	0.120644	OeCa F	Oe	Ca	1	1
Anogam_AGAP007568-RA	0	0.100698	0.120644	OeCa F	Oe	Ca	1	1
Anogam_AGAP007570-RA	0	0.084493	0.120644	OeCa F	Oe	Ca	1	1
Anogam_AGAP007573-RA	0	0.084493	0.120644	OeCa F	Oe	Ca	1	1
Anogam_AGAP007575-RA	0	0.084493	0.120644	OeCa F	Oe	Ca	1	1
Anogam_AGAP007577-RA	0	0.084493	0.120644	OeCa F	Oe	Ca	1	1
Anogam_AGAP007578-RA	0	0.084493	0.120644	OeCa F	Oe	Ca	1	1
Anogam_AGAP007580-RA	-0.0702675	0.0413759	0.120644	OeCa F	Oe	Ca	0.310223	0.380491
Anogam_AGAP007580-RB	0.0702675	0.0338983	0.120644	OeCa F	Oe	Ca	0.689777	0.619509
Anogam_AGAP007581-RA	0	0.084493	0.120644	OeCa F	Oe	Ca	1	1
Anogam_AGAP007583-RB	0.0457392	0.0628116	0.120644	OeCa F	Oe	Ca	0.0701536	0.0244143
Anogam_AGAP007583-RA	-0.0457392	0.0548355	0.120644	OeCa F	Oe	Ca	0.929846	0.975586
Anogam_AGAP007585-RA	0	0.084493	0.120644	OeCa F	Oe	Ca	1	1
Anogam_AGAP007588-RA	0	0.0977069	0.120644	OeCa F	Oe	Ca	1	1
Anogam_AGAP007589-RA	0	0.109172	0.120644	OeCa F	Oe	Ca	1	1
Anogam_AGAP007591-RA	0	0.106181	0.120644	OeCa F	Oe	Ca	1	1
Anogam_AGAP007592-RA	0	0.0902293	0.120644	OeCa F	Oe	Ca	1	1
Anogam_AGAP007593-RA	0.0423725	0.0608175	0.120644	OeCa F	Oe	Ca	0.141794	0.0994219
Anogam_AGAP007593-RB	-0.0423725	0.0516899	0.120644	OeCa F	Oe	Ca	0.858206	0.900578
Anogam_AGAP007594-RA	0	0.107677	0.120644	OeCa F	Oe	Ca	1	1
Anogam_AGAP007596-RA	0	0.0957129	0.120644	OeCa F	Oe	Ca	1	1
Anogam_AGAP007599-RA	0	0.101196	0.120644	OeCa F	Oe	Ca	1	1
Anogam_AGAP007600-RA	0	0.0972084	0.120644	OeCa F	Oe	Ca	1	1
Anogam_AGAP007602-RA	0	0.0922233	0.120644	OeCa F	Oe	Ca	1	1
Anogam_AGAP007604-RA	0	0.104187	0.120644	OeCa F	Oe	Ca	1	1
Anogam_AGAP007607-RA	0	0.0942173	0.120644	OeCa F	Oe	Ca	1	1
Anogam_AGAP007612-RA	0	0.0962114	0.120644	OeCa F	Oe	Ca	1	1
Anogam_AGAP007614-RA	0	0.102692	0.120644	OeCa F	Oe	Ca	1	1
Anogam_AGAP007617-RA	0	0.0932203	0.120644	OeCa F	Oe	Ca	1	1
Anogam_AGAP007619-RA	0	0.100199	0.120644	OeCa F	Oe	Ca	1	1
Anogam_AGAP007620-RA	0	0.0952144	0.120644	OeCa F	Oe	Ca	1	1
Anogam_AGAP007623-RA	0	0.104686	0.120644	OeCa F	Oe	Ca	1	1
Anogam_AGAP007625-RA	0	0.084493	0.120644	OeCa F	Oe	Ca	1	1
Anogam_AGAP007630-RA	0	0.084493	0.120644	OeCa F	Oe	Ca	1	1
Anogam_AGAP007634-RA	0	0.0957129	0.120644	OeCa F	Oe	Ca	1	1
Anogam_AGAP007638-RA	0	0.10319	0.120644	OeCa F	Oe	Ca	1	1
Anogam_AGAP007642-RA	0.0641177	0.0453639	0.120644	OeCa F	Oe	Ca	0.236278	0.172161
Anogam_AGAP007642-RB	-0.0256422	0.0772682	0.120644	OeCa F	Oe	Ca	0.746804	0.772447
Anogam_AGAP007642-RC	-0.0384755	0.0526839	0.120644	OeCa F	Oe	Ca	0.0169173	0.0553928
Anogam_AGAP007643-RB	-0.231397	0.0169492	0.120644	OeCa F	Oe	Ca	0.414891	0.646289
Anogam_AGAP007643-RA	0.24346	0.0129611	0.120644	OeCa F	Oe	Ca	0.382614	0.139154
Anogam_AGAP007643-RD	-0.0196002	0.0626243	0.120644	OeCa F	Oe	Ca	0.126341	0.145941
Anogam_AGAP007643-RC	0.00753698	0.0977069	0.120644	OeCa F	Oe	Ca	0.0761532	0.0686163
Anogam_AGAP007645-RA	0	0.0917248	0.120644	OeCa F	Oe	Ca	1	1
Anogam_AGAP007646-RA	0	0.084493	0.120644	OeCa F	Oe	Ca	1	1
Anogam_AGAP007647-RA	0	0.084493	0.120644	OeCa F	Oe	Ca	1	1
Anogam_AGAP007650-RA	0	0.103689	0.120644	OeCa F	Oe	Ca	1	1
Anogam_AGAP007651-RA	0	0.104686	0.120644	OeCa F	Oe	Ca	1	1
Anogam_AGAP007655-RA	0	0.103689	0.120644	OeCa F	Oe	Ca	1	1
Anogam_AGAP007661-RA	0	0.084493	0.120644	OeCa F	Oe	Ca	1	1
Anogam_AGAP007663-RA	0	0.084493	0.120644	OeCa F	Oe	Ca	1	1
Anogam_AGAP007665-RA	0	0.0997009	0.120644	OeCa F	Oe	Ca	1	1
Anogam_AGAP007666-RA	0	0.0927218	0.120644	OeCa F	Oe	Ca	1	1
Anogam_AGAP007668-RA	0	0.0967099	0.120644	OeCa F	Oe	Ca	1	1
Anogam_AGAP007670-RA	0.000818677	0.111665	0.120644	OeCa F	Oe	Ca	0.676182	0.675364
Anogam_AGAP007670-RB	-0.000818677	0.10319	0.120644	OeCa F	Oe	Ca	0.323818	0.324636
Anogam_AGAP007672-RA	0	0.105184	0.120644	OeCa F	Oe	Ca	1	1
Anogam_AGAP007674-RA	0.0587773	0.058325	0.120644	OeCa F	Oe	Ca	0.200713	0.141935
Anogam_AGAP007674-RB	-0.0587773	0.0633101	0.120644	OeCa F	Oe	Ca	0.799287	0.858065
Anogam_AGAP007675-RA	0	0.101196	0.120644	OeCa F	Oe	Ca	1	1
Anogam_AGAP007677-RA	0	0.114158	0.120644	OeCa F	Oe	Ca	1	1
Anogam_AGAP007679-RA	0	0.117647	0.120644	OeCa F	Oe	Ca	1	1
Anogam_AGAP007682-RA	0	0.0942173	0.120644	OeCa F	Oe	Ca	1	1
Anogam_AGAP007683-RA	0	0.0907278	0.120644	OeCa F	Oe	Ca	1	1
Anogam_AGAP007684-RB	-0.0745576	0.0458624	0.120644	OeCa F	Oe	Ca	0.215306	0.289864
Anogam_AGAP007684-RA	0.0745576	0.0403789	0.120644	OeCa F	Oe	Ca	0.784694	0.710136
Anogam_AGAP007686-RA	0	0.0927218	0.120644	OeCa F	Oe	Ca	1	1
Anogam_AGAP007688-RA	0	0.107677	0.120644	OeCa F	Oe	Ca	1	1
Anogam_AGAP007695-RA	0	0.0972084	0.120644	OeCa F	Oe	Ca	1	1
Anogam_AGAP007698-RA	-0.053732	0.0467197	0.120644	OeCa F	Oe	Ca	0.535075	0.588807
Anogam_AGAP007698-RB	0.053732	0.0467197	0.120644	OeCa F	Oe	Ca	0.464925	0.411193
Anogam_AGAP007698-RC	0	0.0987039	0.120644	OeCa F	Oe	Ca	0	0
Anogam_AGAP007699-RA	0.00859279	0.0897308	0.120644	OeCa F	Oe	Ca	0.0124201	0.00382733
Anogam_AGAP007699-RB	0.109055	0.0318091	0.120644	OeCa F	Oe	Ca	0.295563	0.186507
Anogam_AGAP007699-RC	-0.117648	0.0309073	0.120644	OeCa F	Oe	Ca	0.692017	0.809666
Anogam_AGAP007701-RA	0	0.084493	0.120644	OeCa F	Oe	Ca	1	1
Anogam_AGAP007704-RA	0	0.084493	0.120644	OeCa F	Oe	Ca	1	1
Anogam_AGAP007706-RA	0	0.084493	0.120644	OeCa F	Oe	Ca	1	1
Anogam_AGAP007708-RA	0	0.102692	0.120644	OeCa F	Oe	Ca	1	1
Anogam_AGAP007709-RA	0	0.109671	0.120644	OeCa F	Oe	Ca	1	1
Anogam_AGAP007710-RA	0	0.0987039	0.120644	OeCa F	Oe	Ca	1	1
Anogam_AGAP007711-RA	0	0.084493	0.120644	OeCa F	Oe	Ca	1	1
Anogam_AGAP007715-RA	0	0.084493	0.120644	OeCa F	Oe	Ca	1	1
Anogam_AGAP007716-RA	0	0.104686	0.120644	OeCa F	Oe	Ca	1	1
Anogam_AGAP007717-RA	-0.0193	0.0626243	0.120644	OeCa F	Oe	Ca	0.029701	0.0490009
Anogam_AGAP007717-RB	-0.23219	0.0109671	0.120644	OeCa F	Oe	Ca	0.108261	0.340451
Anogam_AGAP007717-RC	0.25149	0.0104686	0.120644	OeCa F	Oe	Ca	0.862038	0.610548
Anogam_AGAP007720-RA	0	0.0977069	0.120644	OeCa F	Oe	Ca	1	1
Anogam_AGAP007723-RA	0	0.0957129	0.120644	OeCa F	Oe	Ca	1	1
Anogam_AGAP007725-RA	0	0.105184	0.120644	OeCa F	Oe	Ca	1	1
Anogam_AGAP007728-RA	0	0.084493	0.120644	OeCa F	Oe	Ca	1	1
Anogam_AGAP004678-RA	0	0.084493	0.120644	OeCa F	Oe	Ca	1	1
Anogam_AGAP004679-RB	0.0492714	0.0467197	0.120644	OeCa F	Oe	Ca	0.320818	0.271547
Anogam_AGAP004679-RA	-0.0492714	0.0628116	0.120644	OeCa F	Oe	Ca	0.679182	0.728453
Anogam_AGAP004680-RA	0	0.0942173	0.120644	OeCa F	Oe	Ca	1	1
Anogam_AGAP004684-RA	0	0.084493	0.120644	OeCa F	Oe	Ca	1	1
Anogam_AGAP004686-RA	0.0117087	0.0695825	0.120644	OeCa F	Oe	Ca	0.9956	0.983891
Anogam_AGAP004686-RB	-0.0117087	0.0797607	0.120644	OeCa F	Oe	Ca	0.00440019	0.0161089
Anogam_AGAP004689-RA	-0.130975	0.0248509	0.120644	OeCa F	Oe	Ca	0.518682	0.649657
Anogam_AGAP004689-RB	0	0.102193	0.120644	OeCa F	Oe	Ca	0	0
Anogam_AGAP004689-RC	0.130975	0.0383848	0.120644	OeCa F	Oe	Ca	0.481318	0.350343
Anogam_AGAP004692-RA	0.0537483	0.0488534	0.120644	OeCa F	Oe	Ca	0.825364	0.771616
Anogam_AGAP004692-RB	-0.0489624	0.0578265	0.120644	OeCa F	Oe	Ca	0.0837581	0.13272
Anogam_AGAP004692-RC	0	0.0917248	0.120644	OeCa F	Oe	Ca	0	0
Anogam_AGAP004692-RD	-0.00478592	0.0735586	0.120644	OeCa F	Oe	Ca	0.0908778	0.0956637
Anogam_AGAP028434-RA	0	0.102193	0.120644	OeCa F	Oe	Ca	1	1
Anogam_AGAP028435-RA	0	0.116152	0.120644	OeCa F	Oe	Ca	1	1
Anogam_AGAP004695-RA	0	0.104686	0.120644	OeCa F	Oe	Ca	1	1
Anogam_AGAP004699-RA	0	0.0962114	0.120644	OeCa F	Oe	Ca	1	1
Anogam_AGAP004700-RA	0.12474	0.0219342	0.120644	OeCa F	Oe	Ca	1	0.87526
Anogam_AGAP004700-RB	-0.12474	0.0284148	0.120644	OeCa F	Oe	Ca	0	0.12474
Anogam_AGAP004701-RA	0	0.10668	0.120644	OeCa F	Oe	Ca	1	1
Anogam_AGAP004702-RA	0	0.0877368	0.120644	OeCa F	Oe	Ca	1	1
Anogam_AGAP004703-RA	0	0.11665	0.120644	OeCa F	Oe	Ca	1	1
Anogam_AGAP004707-RA	0.0738565	0.0403789	0.120644	OeCa F	Oe	Ca	0.0844336	0.0105771
Anogam_AGAP004707-RB	0.124912	0.0299103	0.120644	OeCa F	Oe	Ca	0.126003	0.00109166
Anogam_AGAP004707-RC	-0.290959	0.0109671	0.120644	OeCa F	Oe	Ca	7.77007e-05	0.291037
Anogam_AGAP004707-RD	0.0347447	0.0578265	0.120644	OeCa F	Oe	Ca	0.0369302	0.00218556
Anogam_AGAP004707-RE	-0.206218	0.0184447	0.120644	OeCa F	Oe	Ca	0.0740371	0.280255
Anogam_AGAP004707-RG	0.105208	0.0338983	0.120644	OeCa F	Oe	Ca	0.136594	0.0313855
Anogam_AGAP004707-RH	0.121315	0.0338983	0.120644	OeCa F	Oe	Ca	0.182143	0.0608281
Anogam_AGAP004707-RI	0.0417946	0.0608175	0.120644	OeCa F	Oe	Ca	0.049376	0.00758142
Anogam_AGAP004707-RJ	0.130195	0.0329013	0.120644	OeCa F	Oe	Ca	0.153067	0.0228722
Anogam_AGAP004707-RK	-0.103186	0.0343968	0.120644	OeCa F	Oe	Ca	0.121552	0.224738
Anogam_AGAP004707-RL	-0.0329978	0.054672	0.120644	OeCa F	Oe	Ca	0	0.0329978
Anogam_AGAP004707-RM	0.00133559	0.0937188	0.120644	OeCa F	Oe	Ca	0.035786	0.0344504
Anogam_AGAP004709-RA	0	0.0937188	0.120644	OeCa F	Oe	Ca	1	1
Anogam_AGAP004711-RA	0	0.112662	0.120644	OeCa F	Oe	Ca	1	1
Anogam_AGAP004712-RA	0	0.106181	0.120644	OeCa F	Oe	Ca	1	1
Anogam_AGAP004714-RA	0	0.084493	0.120644	OeCa F	Oe	Ca	1	1
Anogam_AGAP004715-RA	0	0.0992024	0.120644	OeCa F	Oe	Ca	1	1
Anogam_AGAP004718-RA	0	0.084493	0.120644	OeCa F	Oe	Ca	1	1
Anogam_AGAP004720-RA	0	0.102193	0.120644	OeCa F	Oe	Ca	1	1
Anogam_AGAP004723-RA	0	0.0897308	0.120644	OeCa F	Oe	Ca	1	1
Anogam_AGAP004724-RA	0	0.0997009	0.120644	OeCa F	Oe	Ca	1	1
Anogam_AGAP004725-RA	0	0.0957129	0.120644	OeCa F	Oe	Ca	1	1
Anogam_AGAP004730-RA	0	0.10319	0.120644	OeCa F	Oe	Ca	1	1
Anogam_AGAP004733-RA	0	0.105184	0.120644	OeCa F	Oe	Ca	1	1
Anogam_AGAP004736-RA	0	0.113659	0.120644	OeCa F	Oe	Ca	1	1
Anogam_AGAP004737-RA	0	0.102193	0.120644	OeCa F	Oe	Ca	1	1
Anogam_AGAP004739-RA	0	0.108175	0.120644	OeCa F	Oe	Ca	1	1
Anogam_AGAP004743-RA	0	0.0972084	0.120644	OeCa F	Oe	Ca	1	1
Anogam_AGAP004744-RA	0	0.084493	0.120644	OeCa F	Oe	Ca	1	1
Anogam_AGAP004746-RA	0	0.084493	0.120644	OeCa F	Oe	Ca	1	1
Anogam_AGAP004749-RA	0.00200526	0.0877368	0.120644	OeCa F	Oe	Ca	0.110374	0.108368
Anogam_AGAP004749-RB	-0.00200526	0.112662	0.120644	OeCa F	Oe	Ca	0.889626	0.891632
Anogam_AGAP004751-RA	0	0.10319	0.120644	OeCa F	Oe	Ca	1	1
Anogam_AGAP004752-RA	0	0.118146	0.120644	OeCa F	Oe	Ca	1	1
Anogam_AGAP004754-RA	0	0.104187	0.120644	OeCa F	Oe	Ca	1	1
Anogam_AGAP004755-RA	0	0.103689	0.120644	OeCa F	Oe	Ca	1	1
Anogam_AGAP013546-RA	0	0.0897308	0.120644	OeCa F	Oe	Ca	1	1
Anogam_AGAP004757-RA	0	0.0952144	0.120644	OeCa F	Oe	Ca	1	1
Anogam_AGAP004759-RA	0	0.084493	0.120644	OeCa F	Oe	Ca	1	1
Anogam_AGAP004762-RA	0	0.0977069	0.120644	OeCa F	Oe	Ca	1	1
Anogam_AGAP004763-RA	0	0.0997009	0.120644	OeCa F	Oe	Ca	1	1
Anogam_AGAP004765-RA	0	0.111665	0.120644	OeCa F	Oe	Ca	1	1
Anogam_AGAP004766-RB	0.151633	0.0198807	0.120644	OeCa F	Oe	Ca	0.487716	0.336083
Anogam_AGAP004766-RA	-0.148614	0.0234297	0.120644	OeCa F	Oe	Ca	0.432514	0.581128
Anogam_AGAP004766-RF	0.0038214	0.0877368	0.120644	OeCa F	Oe	Ca	0.0557937	0.0519723
Anogam_AGAP004766-RD	-0.00684093	0.0912263	0.120644	OeCa F	Oe	Ca	0.0239764	0.0308174
Anogam_AGAP004769-RA	0	0.100698	0.120644	OeCa F	Oe	Ca	1	1
Anogam_AGAP004773-RA	0	0.103689	0.120644	OeCa F	Oe	Ca	1	1
Anogam_AGAP004774-RA	0	0.101695	0.120644	OeCa F	Oe	Ca	1	1
Anogam_AGAP004776-RA	0	0.0912263	0.120644	OeCa F	Oe	Ca	1	1
Anogam_AGAP004778-RA	0	0.0907278	0.120644	OeCa F	Oe	Ca	1	1
Anogam_AGAP004784-RA	0	0.0897308	0.120644	OeCa F	Oe	Ca	1	1
Anogam_AGAP004785-RA	0	0.0947159	0.120644	OeCa F	Oe	Ca	1	1
Anogam_AGAP004786-RA	0	0.10668	0.120644	OeCa F	Oe	Ca	1	1
Anogam_AGAP004790-RA	0	0.105683	0.120644	OeCa F	Oe	Ca	1	1
Anogam_AGAP004792-RA	0.0365799	0.058325	0.120644	OeCa F	Oe	Ca	0.0514547	0.0148749
Anogam_AGAP004792-RB	-0.0365799	0.0526839	0.120644	OeCa F	Oe	Ca	0.948545	0.985125
Anogam_AGAP004793-RA	-0.061618	0.0447316	0.120644	OeCa F	Oe	Ca	0.540681	0.602299
Anogam_AGAP004793-RB	0.061618	0.057328	0.120644	OeCa F	Oe	Ca	0.459319	0.397701
Anogam_AGAP004794-RA	0	0.084493	0.120644	OeCa F	Oe	Ca	1	1
Anogam_AGAP004801-RA	-0.302464	0.00695825	0.120644	OeCa F	Oe	Ca	0.257266	0.55973
Anogam_AGAP004801-RC	0.200106	0.0129225	0.120644	OeCa F	Oe	Ca	0.416407	0.216301
Anogam_AGAP004801-RB	0.102358	0.0337972	0.120644	OeCa F	Oe	Ca	0.326327	0.22397
Anogam_AGAP004802-RA	0	0.084493	0.120644	OeCa F	Oe	Ca	1	1
Anogam_AGAP004804-RA	0	0.084493	0.120644	OeCa F	Oe	Ca	1	1
Anogam_AGAP004805-RB	-0.083091	0.0377734	0.120644	OeCa F	Oe	Ca	0.0981405	0.181231
Anogam_AGAP004805-RA	0.083091	0.0377734	0.120644	OeCa F	Oe	Ca	0.901859	0.818769
Anogam_AGAP004807-RA	0	0.10319	0.120644	OeCa F	Oe	Ca	1	1
Anogam_AGAP004811-RA	0	0.084493	0.120644	OeCa F	Oe	Ca	1	1
Anogam_AGAP004818-RA	0	0.100199	0.120644	OeCa F	Oe	Ca	1	1
Anogam_AGAP004820-RA	0	0.109172	0.120644	OeCa F	Oe	Ca	1	1
Anogam_AGAP004825-RA	0	0.115653	0.120644	OeCa F	Oe	Ca	1	1
Anogam_AGAP004827-RA	0	0.105184	0.120644	OeCa F	Oe	Ca	1	1
Anogam_AGAP004833-RA	0	0.084493	0.120644	OeCa F	Oe	Ca	1	1
Anogam_AGAP004835-RA	0	0.0952144	0.120644	OeCa F	Oe	Ca	1	1
Anogam_AGAP004839-RA	0	0.0997009	0.120644	OeCa F	Oe	Ca	1	1
Anogam_AGAP013627-RA	0	0.118146	0.120644	OeCa F	Oe	Ca	1	1
Anogam_AGAP004842-RA	0.0339902	0.0717846	0.120644	OeCa F	Oe	Ca	0.036475	0.00248483
Anogam_AGAP004842-RB	-0.0339902	0.0772682	0.120644	OeCa F	Oe	Ca	0.963525	0.997515
Anogam_AGAP004843-RA	0	0.104187	0.120644	OeCa F	Oe	Ca	1	1
Anogam_AGAP004845-RA	0.000778086	0.110169	0.120644	OeCa F	Oe	Ca	0.995439	0.994661
Anogam_AGAP004845-RB	-0.000778086	0.0947159	0.120644	OeCa F	Oe	Ca	0.00456081	0.00533889
Anogam_AGAP004846-RA	0.202388	0.0194417	0.120644	OeCa F	Oe	Ca	0.232995	0.0306076
Anogam_AGAP004846-RB	-0.259215	0.0154536	0.120644	OeCa F	Oe	Ca	0.707936	0.967151
Anogam_AGAP004846-RC	0.0568275	0.051346	0.120644	OeCa F	Oe	Ca	0.059069	0.00224156
Anogam_AGAP004847-RA	0	0.114656	0.120644	OeCa F	Oe	Ca	1	1
Anogam_AGAP004849-RA	0	0.105683	0.120644	OeCa F	Oe	Ca	1	1
Anogam_AGAP004854-RA	0	0.104686	0.120644	OeCa F	Oe	Ca	1	1
Anogam_AGAP004855-RA	0	0.109671	0.120644	OeCa F	Oe	Ca	1	1
Anogam_AGAP004856-RA	0	0.103689	0.120644	OeCa F	Oe	Ca	1	1
Anogam_AGAP004863-RA	0	0.084493	0.120644	OeCa F	Oe	Ca	1	1
Anogam_AGAP004867-RA	0	0.084493	0.120644	OeCa F	Oe	Ca	1	1
Anogam_AGAP004870-RA	0	0.084493	0.120644	OeCa F	Oe	Ca	1	1
Anogam_AGAP004871-RA	0	0.0927218	0.120644	OeCa F	Oe	Ca	1	1
Anogam_AGAP004876-RA	0	0.106181	0.120644	OeCa F	Oe	Ca	1	1
Anogam_AGAP004877-RA	-0.0267423	0.0717846	0.120644	OeCa F	Oe	Ca	0.936045	0.962787
Anogam_AGAP004877-RB	0.0267423	0.0576541	0.120644	OeCa F	Oe	Ca	0.0639552	0.037213
Anogam_AGAP004879-RA	0	0.0922233	0.120644	OeCa F	Oe	Ca	1	1
Anogam_AGAP004880-RB	-0.0898615	0.0357853	0.120644	OeCa F	Oe	Ca	0.688096	0.777957
Anogam_AGAP004880-RC	0.0203084	0.0626243	0.120644	OeCa F	Oe	Ca	0.0571533	0.0368449
Anogam_AGAP004880-RA	0.0695531	0.0443669	0.120644	OeCa F	Oe	Ca	0.254751	0.185198
Anogam_AGAP004881-RA	0	0.084493	0.120644	OeCa F	Oe	Ca	1	1
Anogam_AGAP004883-RA	0	0.0897308	0.120644	OeCa F	Oe	Ca	1	1
Anogam_AGAP004885-RA	0	0.0997009	0.120644	OeCa F	Oe	Ca	1	1
Anogam_AGAP004888-RA	0	0.104686	0.120644	OeCa F	Oe	Ca	1	1
Anogam_AGAP004890-RA	-0.458768	0.00398804	0.120644	OeCa F	Oe	Ca	0.178581	0.637349
Anogam_AGAP004890-RB	0.458768	0.00398804	0.120644	OeCa F	Oe	Ca	0.821419	0.362651
Anogam_AGAP004892-RA	0	0.084493	0.120644	OeCa F	Oe	Ca	1	1
Anogam_AGAP004899-RA	0	0.0977069	0.120644	OeCa F	Oe	Ca	1	1
Anogam_AGAP004902-RB	-0.0635386	0.0508475	0.120644	OeCa F	Oe	Ca	0	0.0635386
Anogam_AGAP004902-RC	-0.197745	0.0179462	0.120644	OeCa F	Oe	Ca	0.263278	0.461023
Anogam_AGAP004902-RA	0.261283	0.00598205	0.120644	OeCa F	Oe	Ca	0.736722	0.475439
Anogam_AGAP004904-RA	0	0.106181	0.120644	OeCa F	Oe	Ca	1	1
Anogam_AGAP004905-RA	0	0.101695	0.120644	OeCa F	Oe	Ca	1	1
Anogam_AGAP004906-RA	0	0.100199	0.120644	OeCa F	Oe	Ca	1	1
Anogam_AGAP004907-RA	0	0.118146	0.120644	OeCa F	Oe	Ca	1	1
Anogam_AGAP004909-RA	0	0.111665	0.120644	OeCa F	Oe	Ca	1	1
Anogam_AGAP004912-RA	0.0166854	0.0797607	0.120644	OeCa F	Oe	Ca	0.146101	0.129416
Anogam_AGAP004912-RB	-0.0166854	0.0626243	0.120644	OeCa F	Oe	Ca	0.853899	0.870584
Anogam_AGAP004915-RA	0	0.084493	0.120644	OeCa F	Oe	Ca	1	1
Anogam_AGAP004919-RA	0	0.0952144	0.120644	OeCa F	Oe	Ca	1	1
Anogam_AGAP004920-RA	0	0.084493	0.120644	OeCa F	Oe	Ca	1	1
Anogam_AGAP004929-RA	0	0.084493	0.120644	OeCa F	Oe	Ca	1	1
Anogam_AGAP004930-RA	0	0.0967099	0.120644	OeCa F	Oe	Ca	1	1
Anogam_AGAP004931-RA	0	0.0912263	0.120644	OeCa F	Oe	Ca	1	1
Anogam_AGAP028394-RA	0	0.0867398	0.120644	OeCa F	Oe	Ca	1	1
Anogam_AGAP004932-RA	0	0.084493	0.120644	OeCa F	Oe	Ca	1	1
Anogam_AGAP004935-RA	0	0.084493	0.120644	OeCa F	Oe	Ca	1	1
Anogam_AGAP004936-RA	0	0.084493	0.120644	OeCa F	Oe	Ca	1	1
Anogam_AGAP004940-RA	0	0.084493	0.120644	OeCa F	Oe	Ca	1	1
Anogam_AGAP004943-RA	-0.510475	0.000994036	0.120644	OeCa F	Oe	Ca	0.489525	1
Anogam_AGAP004943-RB	0.220387	0.0129225	0.120644	OeCa F	Oe	Ca	0.220387	0
Anogam_AGAP004943-RC	0.290087	0.0119641	0.120644	OeCa F	Oe	Ca	0.290087	0
Anogam_AGAP004947-RA	0	0.084493	0.120644	OeCa F	Oe	Ca	1	1
Anogam_AGAP004949-RA	0	0.084493	0.120644	OeCa F	Oe	Ca	1	1
Anogam_AGAP004950-RA	0	0.084493	0.120644	OeCa F	Oe	Ca	1	1
Anogam_AGAP004952-RA	0	0.11665	0.120644	OeCa F	Oe	Ca	1	1
Anogam_AGAP004955-RB	0.0188278	0.0767697	0.120644	OeCa F	Oe	Ca	0.306621	0.287793
Anogam_AGAP004955-RA	-0.0188278	0.0847458	0.120644	OeCa F	Oe	Ca	0.693379	0.712207
Anogam_AGAP004957-RA	0	0.10319	0.120644	OeCa F	Oe	Ca	1	1
Anogam_AGAP004959-RA	0.0237542	0.0687936	0.120644	OeCa F	Oe	Ca	0.0775288	0.0537746
Anogam_AGAP004959-RB	-0.0237542	0.0576541	0.120644	OeCa F	Oe	Ca	0.922471	0.946225
Anogam_AGAP004961-RA	0	0.084493	0.120644	OeCa F	Oe	Ca	1	1
Anogam_AGAP004963-RA	0	0.084493	0.120644	OeCa F	Oe	Ca	1	1
Anogam_AGAP004965-RB	-0.20753	0.0129225	0.120644	OeCa F	Oe	Ca	0.517965	0.725495
Anogam_AGAP004965-RA	0.20753	0.0159521	0.120644	OeCa F	Oe	Ca	0.482035	0.274505
Anogam_AGAP028425-RA	0	0.0897308	0.120644	OeCa F	Oe	Ca	1	1
Anogam_AGAP004969-RA	0	0.106181	0.120644	OeCa F	Oe	Ca	1	1
Anogam_AGAP004970-RA	0	0.0962114	0.120644	OeCa F	Oe	Ca	1	1
Anogam_AGAP004973-RA	0	0.0937188	0.120644	OeCa F	Oe	Ca	1	1
Anogam_AGAP004984-RA	0	0.104187	0.120644	OeCa F	Oe	Ca	1	1
Anogam_AGAP004986-RA	0	0.101196	0.120644	OeCa F	Oe	Ca	1	1
Anogam_AGAP004987-RA	0	0.105184	0.120644	OeCa F	Oe	Ca	1	1
Anogam_AGAP004988-RA	0	0.0952144	0.120644	OeCa F	Oe	Ca	1	1
Anogam_AGAP004990-RA	0	0.0907278	0.120644	OeCa F	Oe	Ca	1	1
Anogam_AGAP004992-RA	0	0.100199	0.120644	OeCa F	Oe	Ca	1	1
Anogam_AGAP004993-RA	0	0.0862413	0.120644	OeCa F	Oe	Ca	1	1
Anogam_AGAP004997-RA	0	0.108175	0.120644	OeCa F	Oe	Ca	1	1
Anogam_AGAP005004-RA	0	0.102193	0.120644	OeCa F	Oe	Ca	1	1
Anogam_AGAP005005-RA	0	0.113161	0.120644	OeCa F	Oe	Ca	1	1
Anogam_AGAP005006-RA	0	0.0942173	0.120644	OeCa F	Oe	Ca	1	1
Anogam_AGAP005009-RA	0	0.10319	0.120644	OeCa F	Oe	Ca	1	1
Anogam_AGAP005010-RA	0	0.105184	0.120644	OeCa F	Oe	Ca	1	1
Anogam_AGAP005011-RA	0	0.112164	0.120644	OeCa F	Oe	Ca	1	1
Anogam_AGAP005012-RA	0	0.108175	0.120644	OeCa F	Oe	Ca	1	1
Anogam_AGAP005014-RA	0	0.0912263	0.120644	OeCa F	Oe	Ca	1	1
Anogam_AGAP005017-RA	0	0.0932203	0.120644	OeCa F	Oe	Ca	1	1
Anogam_AGAP005019-RA	0	0.111665	0.120644	OeCa F	Oe	Ca	1	1
Anogam_AGAP005022-RA	0	0.10319	0.120644	OeCa F	Oe	Ca	1	1
Anogam_AGAP005024-RA	0	0.101695	0.120644	OeCa F	Oe	Ca	1	1
Anogam_AGAP005026-RA	0	0.105184	0.120644	OeCa F	Oe	Ca	1	1
Anogam_AGAP005028-RA	0	0.111167	0.120644	OeCa F	Oe	Ca	1	1
Anogam_AGAP005029-RA	0.000926961	0.0892323	0.120644	OeCa F	Oe	Ca	0.00635479	0.00542783
Anogam_AGAP005029-RB	-0.000926961	0.105683	0.120644	OeCa F	Oe	Ca	0.993645	0.994572
Anogam_AGAP005032-RA	-0.000680429	0.0907278	0.120644	OeCa F	Oe	Ca	0.00310233	0.00378275
Anogam_AGAP005032-RB	0.000680429	0.0972084	0.120644	OeCa F	Oe	Ca	0.996898	0.996217
Anogam_AGAP005038-RA	0	0.10668	0.120644	OeCa F	Oe	Ca	1	1
Anogam_AGAP005042-RA	0	0.104686	0.120644	OeCa F	Oe	Ca	1	1
Anogam_AGAP005046-RB	0.00946693	0.0722832	0.120644	OeCa F	Oe	Ca	0.993367	0.9839
Anogam_AGAP005046-RA	-0.00946693	0.11665	0.120644	OeCa F	Oe	Ca	0.00663326	0.0161002
Anogam_AGAP028210-RA	0	0.105683	0.120644	OeCa F	Oe	Ca	1	1
Anogam_AGAP005048-RA	0	0.0877368	0.120644	OeCa F	Oe	Ca	1	1
Anogam_AGAP005050-RA	0	0.106181	0.120644	OeCa F	Oe	Ca	1	1
Anogam_AGAP005052-RA	0	0.0947159	0.120644	OeCa F	Oe	Ca	1	1
Anogam_AGAP005055-RA	0	0.0942173	0.120644	OeCa F	Oe	Ca	1	1
Anogam_AGAP005057-RA	0	0.0922233	0.120644	OeCa F	Oe	Ca	1	1
Anogam_AGAP028440-RA	0	0.084493	0.120644	OeCa F	Oe	Ca	1	1
Anogam_AGAP005058-RA	0	0.084493	0.120644	OeCa F	Oe	Ca	1	1
Anogam_AGAP005061-RA	0.00587365	0.0837488	0.120644	OeCa F	Oe	Ca	0.0150777	0.00920403
Anogam_AGAP005061-RB	-0.00587365	0.0725646	0.120644	OeCa F	Oe	Ca	0.984922	0.990796
Anogam_AGAP005062-RA	0	0.101695	0.120644	OeCa F	Oe	Ca	1	1
Anogam_AGAP005064-RB	-0.0666305	0.0528415	0.120644	OeCa F	Oe	Ca	0.0201066	0.0867371
Anogam_AGAP005064-RA	0.0666305	0.0438684	0.120644	OeCa F	Oe	Ca	0.979893	0.913263
Anogam_AGAP005065-RA	0	0.0937188	0.120644	OeCa F	Oe	Ca	1	1
Anogam_AGAP005066-RA	0	0.110668	0.120644	OeCa F	Oe	Ca	1	1
Anogam_AGAP005069-RA	0	0.084493	0.120644	OeCa F	Oe	Ca	1	1
Anogam_AGAP005074-RA	0	0.0982054	0.120644	OeCa F	Oe	Ca	1	1
Anogam_AGAP005075-RB	0.0248942	0.0747757	0.120644	OeCa F	Oe	Ca	0.884914	0.860019
Anogam_AGAP005075-RA	-0.0248942	0.0628116	0.120644	OeCa F	Oe	Ca	0.115086	0.139981
Anogam_AGAP005076-RA	-0.034834	0.0536779	0.120644	OeCa F	Oe	Ca	0.361977	0.396811
Anogam_AGAP005076-RB	0.0133222	0.0666004	0.120644	OeCa F	Oe	Ca	0.467329	0.454006
Anogam_AGAP005076-RC	-0.0194004	0.0837488	0.120644	OeCa F	Oe	Ca	0.0792402	0.0986406
Anogam_AGAP005076-RD	0.0409122	0.0618146	0.120644	OeCa F	Oe	Ca	0.0914545	0.0505423
Anogam_AGAP005077-RA	0	0.103689	0.120644	OeCa F	Oe	Ca	1	1
Anogam_AGAP005079-RC	-0.0139845	0.0666004	0.120644	OeCa F	Oe	Ca	0.038656	0.0526405
Anogam_AGAP005079-RD	0.0244198	0.0762712	0.120644	OeCa F	Oe	Ca	0.0264344	0.00201459
Anogam_AGAP005079-RE	0.00837368	0.0715706	0.120644	OeCa F	Oe	Ca	0.0150152	0.00664154
Anogam_AGAP005079-RI	-0.202172	0.0254237	0.120644	OeCa F	Oe	Ca	0.618906	0.821078
Anogam_AGAP005079-RJ	0.0100322	0.0917248	0.120644	OeCa F	Oe	Ca	0.0161466	0.00611443
Anogam_AGAP005079-RK	-0.0139444	0.0872383	0.120644	OeCa F	Oe	Ca	0.00014959	0.014094
Anogam_AGAP005079-RA	0.0041454	0.0917248	0.120644	OeCa F	Oe	Ca	0.00542401	0.0012786
Anogam_AGAP005079-RB	0.00431825	0.106181	0.120644	OeCa F	Oe	Ca	0.0101226	0.0058044
Anogam_AGAP005079-RF	0.0456962	0.0588235	0.120644	OeCa F	Oe	Ca	0.0593598	0.0136636
Anogam_AGAP005079-RG	0.133754	0.0343968	0.120644	OeCa F	Oe	Ca	0.209577	0.0758234
Anogam_AGAP005079-RH	-0.000637768	0.0947159	0.120644	OeCa F	Oe	Ca	0.000208606	0.000846374
Anogam_AGAP005081-RA	0	0.108175	0.120644	OeCa F	Oe	Ca	1	1
Anogam_AGAP005082-RA	0	0.112164	0.120644	OeCa F	Oe	Ca	1	1
Anogam_AGAP005088-RA	0	0.0952144	0.120644	OeCa F	Oe	Ca	1	1
Anogam_AGAP005091-RB	0.0215329	0.0827517	0.120644	OeCa F	Oe	Ca	0.0347226	0.0131897
Anogam_AGAP005091-RA	0.367287	0.00747757	0.120644	OeCa F	Oe	Ca	0.772115	0.404828
Anogam_AGAP005091-RC	0.000238503	0.0982054	0.120644	OeCa F	Oe	Ca	0.046131	0.0458925
Anogam_AGAP005091-RD	-0.27111	0.00997009	0.120644	OeCa F	Oe	Ca	0.1041	0.37521
Anogam_AGAP005091-RE	-0.117948	0.028827	0.120644	OeCa F	Oe	Ca	0.0429315	0.160879
Anogam_AGAP005095-RA	0	0.0987039	0.120644	OeCa F	Oe	Ca	1	1
Anogam_AGAP005100-RA	0	0.102692	0.120644	OeCa F	Oe	Ca	1	1
Anogam_AGAP005104-RA	0	0.084493	0.120644	OeCa F	Oe	Ca	1	1
Anogam_AGAP005105-RA	0	0.0962114	0.120644	OeCa F	Oe	Ca	1	1
Anogam_AGAP005106-RB	0.194645	0.0119641	0.120644	OeCa F	Oe	Ca	0.283509	0.088864
Anogam_AGAP005106-RA	-0.194645	0.0159521	0.120644	OeCa F	Oe	Ca	0.716491	0.911136
Anogam_AGAP005108-RA	0.00501902	0.0912263	0.120644	OeCa F	Oe	Ca	0.975945	0.970926
Anogam_AGAP005108-RB	-0.00501902	0.0735586	0.120644	OeCa F	Oe	Ca	0.0240553	0.0290743
Anogam_AGAP005110-RA	0	0.084493	0.120644	OeCa F	Oe	Ca	1	1
Anogam_AGAP005111-RA	0.0521801	0.059322	0.120644	OeCa F	Oe	Ca	0.0668714	0.0146914
Anogam_AGAP005111-RB	-0.0521801	0.0467197	0.120644	OeCa F	Oe	Ca	0.933129	0.985309
Anogam_AGAP005116-RA	0	0.102193	0.120644	OeCa F	Oe	Ca	1	1
Anogam_AGAP005118-RA	0	0.101196	0.120644	OeCa F	Oe	Ca	1	1
Anogam_AGAP005121-RB	0.0722674	0.0397614	0.120644	OeCa F	Oe	Ca	0.485253	0.412986
Anogam_AGAP005121-RA	-0.0722674	0.0397614	0.120644	OeCa F	Oe	Ca	0.514747	0.587014
Anogam_AGAP005128-RA	0	0.107677	0.120644	OeCa F	Oe	Ca	1	1
Anogam_AGAP005130-RA	0	0.107178	0.120644	OeCa F	Oe	Ca	1	1
Anogam_AGAP005132-RA	0	0.084493	0.120644	OeCa F	Oe	Ca	1	1
Anogam_AGAP005134-RA	0	0.084493	0.120644	OeCa F	Oe	Ca	1	1
Anogam_AGAP005136-RA	0	0.084493	0.120644	OeCa F	Oe	Ca	1	1
Anogam_AGAP005141-RA	0	0.0932203	0.120644	OeCa F	Oe	Ca	1	1
Anogam_AGAP005142-RA	0	0.0952144	0.120644	OeCa F	Oe	Ca	1	1
Anogam_AGAP005144-RA	0	0.0937188	0.120644	OeCa F	Oe	Ca	1	1
Anogam_AGAP005145-RA	0	0.0947159	0.120644	OeCa F	Oe	Ca	1	1
Anogam_AGAP005146-RA	0	0.0957129	0.120644	OeCa F	Oe	Ca	1	1
Anogam_AGAP005148-RB	-0.0335034	0.0747757	0.120644	OeCa F	Oe	Ca	0	0.0335034
Anogam_AGAP005148-RA	0.0335034	0.0697906	0.120644	OeCa F	Oe	Ca	1	0.966497
Anogam_AGAP005152-RA	0	0.10668	0.120644	OeCa F	Oe	Ca	1	1
Anogam_AGAP005153-RA	0	0.084493	0.120644	OeCa F	Oe	Ca	1	1
Anogam_AGAP005153-RB	0	0.0972084	0.120644	OeCa F	Oe	Ca	0	0
Anogam_AGAP005155-RA	0	0.104686	0.120644	OeCa F	Oe	Ca	1	1
Anogam_AGAP005161-RA	0	0.084493	0.120644	OeCa F	Oe	Ca	1	1
Anogam_AGAP005163-RA	0	0.101196	0.120644	OeCa F	Oe	Ca	1	1
Anogam_AGAP005167-RA	0	0.084493	0.120644	OeCa F	Oe	Ca	1	1
Anogam_AGAP005168-RA	0	0.084493	0.120644	OeCa F	Oe	Ca	1	1
Anogam_AGAP005169-RA	0	0.112164	0.120644	OeCa F	Oe	Ca	1	1
Anogam_AGAP005172-RA	0	0.104686	0.120644	OeCa F	Oe	Ca	1	1
Anogam_AGAP005175-RA	0.086065	0.0357853	0.120644	OeCa F	Oe	Ca	0.284515	0.19845
Anogam_AGAP005175-RB	-0.086065	0.0373878	0.120644	OeCa F	Oe	Ca	0.715485	0.80155
Anogam_AGAP005176-RA	0	0.105184	0.120644	OeCa F	Oe	Ca	1	1
Anogam_AGAP005177-RA	0	0.0962114	0.120644	OeCa F	Oe	Ca	1	1
Anogam_AGAP005187-RA	0	0.109671	0.120644	OeCa F	Oe	Ca	1	1
Anogam_AGAP005188-RA	0	0.109671	0.120644	OeCa F	Oe	Ca	1	1
Anogam_AGAP005191-RA	0	0.0942173	0.120644	OeCa F	Oe	Ca	1	1
Anogam_AGAP005193-RA	0	0.084493	0.120644	OeCa F	Oe	Ca	1	1
Anogam_AGAP005198-RA	0	0.109671	0.120644	OeCa F	Oe	Ca	1	1
Anogam_AGAP005202-RB	0.0500461	0.059322	0.120644	OeCa F	Oe	Ca	0.844789	0.794743
Anogam_AGAP005202-RA	-0.0500461	0.05334	0.120644	OeCa F	Oe	Ca	0.155211	0.205257
Anogam_AGAP005206-RA	0	0.109671	0.120644	OeCa F	Oe	Ca	1	1
Anogam_AGAP005208-RA	0	0.112164	0.120644	OeCa F	Oe	Ca	1	1
Anogam_AGAP005210-RA	0	0.084493	0.120644	OeCa F	Oe	Ca	1	1
Anogam_AGAP005212-RA	0	0.084493	0.120644	OeCa F	Oe	Ca	1	1
Anogam_AGAP005216-RA	0	0.084493	0.120644	OeCa F	Oe	Ca	1	1
Anogam_AGAP005221-RA	0	0.084493	0.120644	OeCa F	Oe	Ca	1	1
Anogam_AGAP005222-RA	-0.0531566	0.0467197	0.120644	OeCa F	Oe	Ca	0.317074	0.370231
Anogam_AGAP005222-RB	0.0531566	0.0467197	0.120644	OeCa F	Oe	Ca	0.682926	0.629769
Anogam_AGAP005223-RA	0	0.084493	0.120644	OeCa F	Oe	Ca	1	1
Anogam_AGAP005227-RA	0	0.114158	0.120644	OeCa F	Oe	Ca	1	1
Anogam_AGAP005237-RA	0	0.084493	0.120644	OeCa F	Oe	Ca	1	1
Anogam_AGAP005238-RA	0	0.116152	0.120644	OeCa F	Oe	Ca	1	1
Anogam_AGAP005240-RA	0	0.103689	0.120644	OeCa F	Oe	Ca	1	1
Anogam_AGAP005241-RA	0	0.100199	0.120644	OeCa F	Oe	Ca	1	1
Anogam_AGAP005242-RA	0	0.0927218	0.120644	OeCa F	Oe	Ca	1	1
Anogam_AGAP005245-RC	0.0262817	0.0663011	0.120644	OeCa F	Oe	Ca	0.0514482	0.0251665
Anogam_AGAP005245-RF	-0.00263196	0.10319	0.120644	OeCa F	Oe	Ca	0.0202968	0.0229287
Anogam_AGAP005245-RE	-0.0617356	0.0447316	0.120644	OeCa F	Oe	Ca	0.0252443	0.0869799
Anogam_AGAP005245-RL	0.00558546	0.0862413	0.120644	OeCa F	Oe	Ca	0.238994	0.233408
Anogam_AGAP005245-RA	-0.0338405	0.0588235	0.120644	OeCa F	Oe	Ca	0.0465469	0.0803874
Anogam_AGAP005245-RB	-0.0013401	0.115155	0.120644	OeCa F	Oe	Ca	0.0313641	0.0327042
Anogam_AGAP005245-RG	0.00260394	0.0942173	0.120644	OeCa F	Oe	Ca	0.24109	0.238487
Anogam_AGAP005245-RJ	0.0224848	0.0802592	0.120644	OeCa F	Oe	Ca	0.0407617	0.0182769
Anogam_AGAP005245-RH	0.00914289	0.0862413	0.120644	OeCa F	Oe	Ca	0.0439074	0.0347646
Anogam_AGAP005245-RI	0.0398071	0.0722832	0.120644	OeCa F	Oe	Ca	0.096982	0.0571749
Anogam_AGAP005245-RD	-0.0531306	0.0623131	0.120644	OeCa F	Oe	Ca	0.0787983	0.131929
Anogam_AGAP005245-RK	0.0467729	0.0467197	0.120644	OeCa F	Oe	Ca	0.0845663	0.0377934
Anogam_AGAP005247-RA	0	0.105683	0.120644	OeCa F	Oe	Ca	1	1
Anogam_AGAP005248-RA	0	0.0907278	0.120644	OeCa F	Oe	Ca	1	1
Anogam_AGAP005250-RA	0	0.106181	0.120644	OeCa F	Oe	Ca	1	1
Anogam_AGAP005251-RA	0	0.111665	0.120644	OeCa F	Oe	Ca	1	1
Anogam_AGAP005253-RA	0	0.084493	0.120644	OeCa F	Oe	Ca	1	1
Anogam_AGAP005253-RB	0	0.108674	0.120644	OeCa F	Oe	Ca	0	0
Anogam_AGAP005257-RA	0	0.108674	0.120644	OeCa F	Oe	Ca	1	1
Anogam_AGAP005258-RA	0	0.0987039	0.120644	OeCa F	Oe	Ca	1	1
Anogam_AGAP005261-RA	0	0.102692	0.120644	OeCa F	Oe	Ca	1	1
Anogam_AGAP005267-RA	0	0.084493	0.120644	OeCa F	Oe	Ca	1	1
Anogam_AGAP005271-RA	0	0.084493	0.120644	OeCa F	Oe	Ca	1	1
Anogam_AGAP005272-RA	0	0.084493	0.120644	OeCa F	Oe	Ca	1	1
Anogam_AGAP005273-RA	0	0.084493	0.120644	OeCa F	Oe	Ca	1	1
Anogam_AGAP005275-RA	0	0.084493	0.120644	OeCa F	Oe	Ca	1	1
Anogam_AGAP005279-RB	0.17002	0.0159046	0.120644	OeCa F	Oe	Ca	0.789063	0.619044
Anogam_AGAP005279-RA	-0.17002	0.0159046	0.120644	OeCa F	Oe	Ca	0.210937	0.380956
Anogam_AGAP005280-RA	0	0.084493	0.120644	OeCa F	Oe	Ca	1	1
Anogam_AGAP005282-RA	0	0.0992024	0.120644	OeCa F	Oe	Ca	1	1
Anogam_AGAP005285-RA	0	0.102692	0.120644	OeCa F	Oe	Ca	1	1
Anogam_AGAP005288-RB	0.0431684	0.0672981	0.120644	OeCa F	Oe	Ca	0.294257	0.251089
Anogam_AGAP005288-RA	-0.0917321	0.0363908	0.120644	OeCa F	Oe	Ca	0.169577	0.261309
Anogam_AGAP005288-RC	0.0485637	0.0568295	0.120644	OeCa F	Oe	Ca	0.536166	0.487602
Anogam_AGAP005289-RA	0	0.101196	0.120644	OeCa F	Oe	Ca	1	1
Anogam_AGAP005291-RA	0.0344488	0.054672	0.120644	OeCa F	Oe	Ca	0.759521	0.725072
Anogam_AGAP005291-RB	-0.0344488	0.0623131	0.120644	OeCa F	Oe	Ca	0.240479	0.274928
Anogam_AGAP005293-RA	0.0745061	0.0383848	0.120644	OeCa F	Oe	Ca	0.203034	0.128528
Anogam_AGAP005293-RB	-0.0745061	0.0428714	0.120644	OeCa F	Oe	Ca	0.796966	0.871472
Anogam_AGAP005294-RB	0.494304	0.00448654	0.120644	OeCa F	Oe	Ca	0.954845	0.460541
Anogam_AGAP005294-RA	-0.494304	0.00398804	0.120644	OeCa F	Oe	Ca	0.0451553	0.539459
Anogam_AGAP005296-RA	0	0.084493	0.120644	OeCa F	Oe	Ca	1	1
Anogam_AGAP005297-RA	0	0.084493	0.120644	OeCa F	Oe	Ca	1	1
Anogam_AGAP005299-RA	0	0.0932203	0.120644	OeCa F	Oe	Ca	1	1
Anogam_AGAP005302-RA	0	0.0997009	0.120644	OeCa F	Oe	Ca	1	1
Anogam_AGAP005305-RA	0	0.117149	0.120644	OeCa F	Oe	Ca	1	1
Anogam_AGAP005307-RA	0	0.0977069	0.120644	OeCa F	Oe	Ca	1	1
Anogam_AGAP005313-RA	0	0.084493	0.120644	OeCa F	Oe	Ca	1	1
Anogam_AGAP005319-RA	0	0.102692	0.120644	OeCa F	Oe	Ca	1	1
Anogam_AGAP005320-RA	0	0.084493	0.120644	OeCa F	Oe	Ca	1	1
Anogam_AGAP005322-RA	-0.0929867	0.0347913	0.120644	OeCa F	Oe	Ca	0.907013	1
Anogam_AGAP005322-RB	0.0929867	0.0353938	0.120644	OeCa F	Oe	Ca	0.0929867	0
Anogam_AGAP005323-RA	0.00718575	0.0725646	0.120644	OeCa F	Oe	Ca	0.711285	0.704099
Anogam_AGAP005323-RB	-0.00718575	0.0932203	0.120644	OeCa F	Oe	Ca	0.288715	0.295901
Anogam_AGAP005324-RB	0.167281	0.0274177	0.120644	OeCa F	Oe	Ca	0.486913	0.319632
Anogam_AGAP005324-RA	-0.167281	0.0184447	0.120644	OeCa F	Oe	Ca	0.513087	0.680368
Anogam_AGAP005325-RA	0	0.0917808	0.120644	OeCa F	Oe	Ca	1	1
Anogam_AGAP005326-RA	0	0.105683	0.120644	OeCa F	Oe	Ca	1	1
Anogam_AGAP005327-RA	0	0.0952144	0.120644	OeCa F	Oe	Ca	1	1
Anogam_AGAP005332-RA	0.129667	0.0248509	0.120644	OeCa F	Oe	Ca	0.62695	0.497284
Anogam_AGAP005332-RB	0.0397163	0.0526839	0.120644	OeCa F	Oe	Ca	0.37305	0.333333
Anogam_AGAP005332-RC	-0.169383	0.0254237	0.120644	OeCa F	Oe	Ca	0	0.169383
Anogam_AGAP005333-RA	0	0.101695	0.120644	OeCa F	Oe	Ca	1	1
Anogam_AGAP005334-RA	0	0.084493	0.120644	OeCa F	Oe	Ca	1	1
Anogam_AGAP005336-RA	0	0.084493	0.120644	OeCa F	Oe	Ca	1	1
Anogam_AGAP005344-RA	0	0.111167	0.120644	OeCa F	Oe	Ca	1	1
Anogam_AGAP005345-RA	0	0.112662	0.120644	OeCa F	Oe	Ca	1	1
Anogam_AGAP005346-RA	0	0.0982054	0.120644	OeCa F	Oe	Ca	1	1
Anogam_AGAP005349-RA	0	0.084493	0.120644	OeCa F	Oe	Ca	1	1
Anogam_AGAP005350-RA	0	0.084493	0.120644	OeCa F	Oe	Ca	1	1
Anogam_AGAP005352-RA	0	0.0977069	0.120644	OeCa F	Oe	Ca	1	1
Anogam_AGAP005352-RB	0	0.0952144	0.120644	OeCa F	Oe	Ca	0	0
Anogam_AGAP005354-RA	0	0.11665	0.120644	OeCa F	Oe	Ca	1	1
Anogam_AGAP005355-RA	0	0.103689	0.120644	OeCa F	Oe	Ca	1	1
Anogam_AGAP005359-RA	0	0.0957129	0.120644	OeCa F	Oe	Ca	1	1
Anogam_AGAP005360-RA	-0.00511182	0.0977069	0.120644	OeCa F	Oe	Ca	0.977268	0.982379
Anogam_AGAP005360-RB	0.00511182	0.0907278	0.120644	OeCa F	Oe	Ca	0.0227323	0.0176205
Anogam_AGAP005361-RA	0	0.117647	0.120644	OeCa F	Oe	Ca	1	1
Anogam_AGAP005364-RA	0	0.10668	0.120644	OeCa F	Oe	Ca	1	1
Anogam_AGAP005366-RA	0	0.0982054	0.120644	OeCa F	Oe	Ca	1	1
Anogam_AGAP005374-RA	0	0.107677	0.120644	OeCa F	Oe	Ca	1	1
Anogam_AGAP005375-RA	0	0.084493	0.120644	OeCa F	Oe	Ca	1	1
Anogam_AGAP005379-RA	0	0.103689	0.120644	OeCa F	Oe	Ca	1	1
Anogam_AGAP005380-RA	0	0.10319	0.120644	OeCa F	Oe	Ca	1	1
Anogam_AGAP005382-RA	0	0.106181	0.120644	OeCa F	Oe	Ca	1	1
Anogam_AGAP005391-RA	0	0.0987039	0.120644	OeCa F	Oe	Ca	1	1
Anogam_AGAP005393-RA	0	0.0927218	0.120644	OeCa F	Oe	Ca	1	1
Anogam_AGAP005396-RA	0	0.084493	0.120644	OeCa F	Oe	Ca	1	1
Anogam_AGAP005397-RA	0	0.0927218	0.120644	OeCa F	Oe	Ca	1	1
Anogam_AGAP005398-RA	0	0.0952144	0.120644	OeCa F	Oe	Ca	1	1
Anogam_AGAP005399-RA	0	0.114158	0.120644	OeCa F	Oe	Ca	1	1
Anogam_AGAP005400-RA	0.337545	0.0109671	0.120644	OeCa F	Oe	Ca	0.623599	0.286054
Anogam_AGAP005400-RB	-0.337545	0.0104686	0.120644	OeCa F	Oe	Ca	0.376401	0.713946
Anogam_AGAP005402-RA	0	0.104187	0.120644	OeCa F	Oe	Ca	1	1
Anogam_AGAP005407-RA	0	0.0987039	0.120644	OeCa F	Oe	Ca	1	1
Anogam_AGAP005410-RC	-0.115306	0.0299103	0.120644	OeCa F	Oe	Ca	0.692563	0.807869
Anogam_AGAP005410-RA	0.117457	0.0398804	0.120644	OeCa F	Oe	Ca	0.307437	0.18998
Anogam_AGAP005410-RB	-0.00215057	0.112662	0.120644	OeCa F	Oe	Ca	0	0.00215057
Anogam_AGAP005413-RA	0	0.115155	0.120644	OeCa F	Oe	Ca	1	1
Anogam_AGAP005413-RB	0	0.110668	0.120644	OeCa F	Oe	Ca	0	0
Anogam_AGAP005415-RA	0	0.0932203	0.120644	OeCa F	Oe	Ca	1	1
Anogam_AGAP005417-RA	0	0.0987039	0.120644	OeCa F	Oe	Ca	1	1
Anogam_AGAP005419-RA	0	0.084493	0.120644	OeCa F	Oe	Ca	1	1
Anogam_AGAP005421-RA	0	0.103689	0.120644	OeCa F	Oe	Ca	1	1
Anogam_AGAP005423-RA	0	0.084493	0.120644	OeCa F	Oe	Ca	1	1
Anogam_AGAP005427-RA	0	0.084493	0.120644	OeCa F	Oe	Ca	1	1
Anogam_AGAP005429-RA	0	0.101196	0.120644	OeCa F	Oe	Ca	1	1
Anogam_AGAP005431-RA	0	0.0922233	0.120644	OeCa F	Oe	Ca	1	1
Anogam_AGAP005433-RA	0	0.0905125	0.120644	OeCa F	Oe	Ca	1	1
Anogam_AGAP005435-RA	0	0.102692	0.120644	OeCa F	Oe	Ca	1	1
Anogam_AGAP005438-RA	0	0.084493	0.120644	OeCa F	Oe	Ca	1	1
Anogam_AGAP005446-RA	0	0.084493	0.120644	OeCa F	Oe	Ca	1	1
Anogam_AGAP005447-RA	0	0.0917248	0.120644	OeCa F	Oe	Ca	1	1
Anogam_AGAP005459-RA	0	0.117647	0.120644	OeCa F	Oe	Ca	1	1
Anogam_AGAP005460-RA	0	0.0897308	0.120644	OeCa F	Oe	Ca	1	1
Anogam_AGAP005462-RA	0	0.106181	0.120644	OeCa F	Oe	Ca	1	1
Anogam_AGAP005464-RA	0	0.084493	0.120644	OeCa F	Oe	Ca	1	1
Anogam_AGAP005465-RA	0	0.084493	0.120644	OeCa F	Oe	Ca	1	1
Anogam_AGAP005467-RB	-0.215541	0.0129225	0.120644	OeCa F	Oe	Ca	0.296935	0.512476
Anogam_AGAP005467-RA	0.215541	0.0159521	0.120644	OeCa F	Oe	Ca	0.703065	0.487524
Anogam_AGAP005468-RB	-0.172903	0.0244267	0.120644	OeCa F	Oe	Ca	0.320394	0.493297
Anogam_AGAP005468-RA	0.172903	0.0159046	0.120644	OeCa F	Oe	Ca	0.679606	0.506703
Anogam_AGAP005470-RA	0	0.084493	0.120644	OeCa F	Oe	Ca	1	1
Anogam_AGAP005471-RA	0	0.100199	0.120644	OeCa F	Oe	Ca	1	1
Anogam_AGAP005473-RA	0	0.0932203	0.120644	OeCa F	Oe	Ca	1	1
Anogam_AGAP005479-RA	0	0.0957129	0.120644	OeCa F	Oe	Ca	1	1
Anogam_AGAP005480-RA	0	0.084493	0.120644	OeCa F	Oe	Ca	1	1
Anogam_AGAP005481-RA	0	0.112164	0.120644	OeCa F	Oe	Ca	1	1
Anogam_AGAP005482-RA	0	0.0897308	0.120644	OeCa F	Oe	Ca	1	1
Anogam_AGAP005485-RA	0	0.0927218	0.120644	OeCa F	Oe	Ca	1	1
Anogam_AGAP028605-RA	0	0.112662	0.120644	OeCa F	Oe	Ca	1	1
Anogam_AGAP005496-RA	0	0.100199	0.120644	OeCa F	Oe	Ca	1	1
Anogam_AGAP005500-RA	0	0.104187	0.120644	OeCa F	Oe	Ca	1	1
Anogam_AGAP005501-RA	0	0.101695	0.120644	OeCa F	Oe	Ca	1	1
Anogam_AGAP005502-RA	0	0.118146	0.120644	OeCa F	Oe	Ca	1	1
Anogam_AGAP005503-RA	0	0.105683	0.120644	OeCa F	Oe	Ca	1	1
Anogam_AGAP005506-RA	0	0.105184	0.120644	OeCa F	Oe	Ca	1	1
Anogam_AGAP005507-RB	-0.0479259	0.0518445	0.120644	OeCa F	Oe	Ca	0.578728	0.626654
Anogam_AGAP005507-RC	-0.0248405	0.0576541	0.120644	OeCa F	Oe	Ca	0.341322	0.366162
Anogam_AGAP005507-RA	0.0727664	0.0413759	0.120644	OeCa F	Oe	Ca	0.0799496	0.00718319
Anogam_AGAP005509-RA	0	0.101695	0.120644	OeCa F	Oe	Ca	1	1
Anogam_AGAP005511-RA	0	0.108175	0.120644	OeCa F	Oe	Ca	1	1
Anogam_AGAP005512-RA	0	0.0937188	0.120644	OeCa F	Oe	Ca	1	1
Anogam_AGAP005513-RA	0	0.084493	0.120644	OeCa F	Oe	Ca	1	1
Anogam_AGAP005518-RA	0	0.105683	0.120644	OeCa F	Oe	Ca	1	1
Anogam_AGAP005519-RA	0	0.106181	0.120644	OeCa F	Oe	Ca	1	1
Anogam_AGAP005522-RA	0	0.105683	0.120644	OeCa F	Oe	Ca	1	1
Anogam_AGAP005523-RA	0	0.0917248	0.120644	OeCa F	Oe	Ca	1	1
Anogam_AGAP005525-RA	0	0.11665	0.120644	OeCa F	Oe	Ca	1	1
Anogam_AGAP005528-RB	0.00158317	0.0842473	0.120644	OeCa F	Oe	Ca	0.00261474	0.00103157
Anogam_AGAP005528-RA	-0.00158317	0.0775348	0.120644	OeCa F	Oe	Ca	0.997385	0.998968
Anogam_AGAP005529-RA	0.0621006	0.0447316	0.120644	OeCa F	Oe	Ca	0.384416	0.322315
Anogam_AGAP005529-RB	-0.132714	0.0299103	0.120644	OeCa F	Oe	Ca	0.458116	0.59083
Anogam_AGAP005529-RC	0.0706133	0.0458624	0.120644	OeCa F	Oe	Ca	0.157468	0.086855
Anogam_AGAP005532-RA	0	0.084493	0.120644	OeCa F	Oe	Ca	1	1
Anogam_AGAP005534-RA	0	0.0897308	0.120644	OeCa F	Oe	Ca	1	1
Anogam_AGAP005536-RA	0	0.0882353	0.120644	OeCa F	Oe	Ca	1	1
Anogam_AGAP005538-RA	0	0.0972084	0.120644	OeCa F	Oe	Ca	1	1
Anogam_AGAP005541-RA	0	0.0932203	0.120644	OeCa F	Oe	Ca	1	1
Anogam_AGAP005545-RA	0	0.084493	0.120644	OeCa F	Oe	Ca	1	1
Anogam_AGAP005546-RA	0	0.0987039	0.120644	OeCa F	Oe	Ca	1	1
Anogam_AGAP005547-RA	0	0.11665	0.120644	OeCa F	Oe	Ca	1	1
Anogam_AGAP005549-RA	0	0.0927218	0.120644	OeCa F	Oe	Ca	1	1
Anogam_AGAP005551-RA	0	0.112662	0.120644	OeCa F	Oe	Ca	1	1
Anogam_AGAP005552-RA	-0.0142729	0.0897308	0.120644	OeCa F	Oe	Ca	0.673137	0.68741
Anogam_AGAP005552-RB	0.0142729	0.0842473	0.120644	OeCa F	Oe	Ca	0.326863	0.31259
Anogam_AGAP005557-RA	0	0.084493	0.120644	OeCa F	Oe	Ca	1	1
Anogam_AGAP005558-RA	0	0.084493	0.120644	OeCa F	Oe	Ca	1	1
Anogam_AGAP005559-RA	0	0.107677	0.120644	OeCa F	Oe	Ca	1	1
Anogam_AGAP005561-RA	0	0.0927218	0.120644	OeCa F	Oe	Ca	1	1
Anogam_AGAP005563-RA	0.159297	0.0274177	0.120644	OeCa F	Oe	Ca	0.181503	0.0222061
Anogam_AGAP005563-RB	0.00695682	0.0877368	0.120644	OeCa F	Oe	Ca	0.394975	0.388018
Anogam_AGAP005563-RC	-0.166254	0.0249252	0.120644	OeCa F	Oe	Ca	0.423522	0.589776
Anogam_AGAP005567-RA	-0.0367441	0.060319	0.120644	OeCa F	Oe	Ca	0.963256	1
Anogam_AGAP005567-RB	0.0367441	0.0648056	0.120644	OeCa F	Oe	Ca	0.0367441	0
Anogam_AGAP005569-RA	0	0.084493	0.120644	OeCa F	Oe	Ca	1	1
Anogam_AGAP005576-RA	0	0.084493	0.120644	OeCa F	Oe	Ca	1	1
Anogam_AGAP005577-RA	0	0.084493	0.120644	OeCa F	Oe	Ca	1	1
Anogam_AGAP005581-RA	0	0.102193	0.120644	OeCa F	Oe	Ca	1	1
Anogam_AGAP005583-RA	0	0.0977069	0.120644	OeCa F	Oe	Ca	1	1
Anogam_AGAP005585-RB	-0.226512	0.0184447	0.120644	OeCa F	Oe	Ca	0.0696442	0.296156
Anogam_AGAP005585-RA	0.133067	0.0254237	0.120644	OeCa F	Oe	Ca	0.338699	0.205633
Anogam_AGAP005585-RC	0.0934449	0.0333998	0.120644	OeCa F	Oe	Ca	0.591657	0.498212
Anogam_AGAP005595-RA	0	0.084493	0.120644	OeCa F	Oe	Ca	1	1
Anogam_AGAP005599-RK	0.309841	0.00596421	0.120644	OeCa F	Oe	Ca	0.655391	0.34555
Anogam_AGAP005599-RI	-0.154368	0.0224327	0.120644	OeCa F	Oe	Ca	0	0.154368
Anogam_AGAP005599-RA	0.157498	0.0178926	0.120644	OeCa F	Oe	Ca	0.269116	0.111618
Anogam_AGAP005599-RB	0.0754872	0.0397614	0.120644	OeCa F	Oe	Ca	0.0754872	0
Anogam_AGAP005599-RC	-0.0809475	0.0377734	0.120644	OeCa F	Oe	Ca	0	0.0809475
Anogam_AGAP005599-RE	-0.307511	0.00695825	0.120644	OeCa F	Oe	Ca	5.18198e-06	0.307516
Anogam_AGAP005599-RG	0	0.084493	0.120644	OeCa F	Oe	Ca	0	0
Anogam_AGAP005601-RA	0	0.103689	0.120644	OeCa F	Oe	Ca	1	1
Anogam_AGAP005602-RA	0	0.084493	0.120644	OeCa F	Oe	Ca	1	1
Anogam_AGAP005604-RA	0	0.084493	0.120644	OeCa F	Oe	Ca	1	1
Anogam_AGAP005606-RA	0	0.084493	0.120644	OeCa F	Oe	Ca	1	1
Anogam_AGAP005609-RA	-0.00105399	0.0775348	0.120644	OeCa F	Oe	Ca	0.0182029	0.0192568
Anogam_AGAP005609-RB	0.00105399	0.0775348	0.120644	OeCa F	Oe	Ca	0.981797	0.980743
Anogam_AGAP005610-RA	0	0.084493	0.120644	OeCa F	Oe	Ca	1	1
Anogam_AGAP005611-RA	0	0.084493	0.120644	OeCa F	Oe	Ca	1	1
Anogam_AGAP005612-RA	0	0.11665	0.120644	OeCa F	Oe	Ca	1	1
Anogam_AGAP005615-RA	0	0.10668	0.120644	OeCa F	Oe	Ca	1	1
Anogam_AGAP005617-RB	0	0.114158	0.120644	OeCa F	Oe	Ca	1	1
Anogam_AGAP005617-RA	0	0.113659	0.120644	OeCa F	Oe	Ca	0	0
Anogam_AGAP005619-RA	0	0.105184	0.120644	OeCa F	Oe	Ca	1	1
Anogam_AGAP005620-RA	0	0.104187	0.120644	OeCa F	Oe	Ca	1	1
Anogam_AGAP005622-RA	0	0.114656	0.120644	OeCa F	Oe	Ca	1	1
Anogam_AGAP005624-RA	-0.0184636	0.0832502	0.120644	OeCa F	Oe	Ca	0.0942577	0.112721
Anogam_AGAP005624-RB	0.0184636	0.0752742	0.120644	OeCa F	Oe	Ca	0.905742	0.887279
Anogam_AGAP005627-RE	0.0336339	0.0588235	0.120644	OeCa F	Oe	Ca	0.0679205	0.0342866
Anogam_AGAP005627-RG	0.0629067	0.0558325	0.120644	OeCa F	Oe	Ca	0.0774893	0.0145827
Anogam_AGAP005627-RD	-0.171401	0.0224327	0.120644	OeCa F	Oe	Ca	0.647669	0.819069
Anogam_AGAP005627-RC	-0.0230974	0.0727817	0.120644	OeCa F	Oe	Ca	0.00761907	0.0307165
Anogam_AGAP005627-RA	0.0357472	0.0536779	0.120644	OeCa F	Oe	Ca	0.124333	0.0885855
[truncated: 13,350 more rows]

## Sheet: Sheet 3
isoform	dPSI	pval	pval.corr	comparison	group.i	group.j	PSI.i	PSI.j
Anogam_AGAP004677-RA	-0.267506	0.00997009	0.114034	OeCa M	Oe	Ca	0.228582	0.496087
Anogam_AGAP004677-RB	0.267506	0.00997009	0.114034	OeCa M	Oe	Ca	0.771418	0.503913
Anogam_AGAP004681-RA	0	0.101196	0.114034	OeCa M	Oe	Ca	1	1
Anogam_AGAP004682-RA	0	0.0957129	0.114034	OeCa M	Oe	Ca	1	1
Anogam_AGAP028431-RA	0	0.0917248	0.114034	OeCa M	Oe	Ca	1	1
Anogam_AGAP004683-RA	0	0.112662	0.114325	OeCa M	Oe	Ca	1	1
Anogam_AGAP004685-RA	0.0475109	0.0437376	0.114034	OeCa M	Oe	Ca	0.975193	0.927682
Anogam_AGAP004685-RB	-0.0475109	0.060319	0.114034	OeCa M	Oe	Ca	0.0248072	0.0723181
Anogam_AGAP004687-RA	NA	NA	NA	OeCa M	Oe	Ca	NA	1
Anogam_AGAP028432-RA	0	0.102692	0.114034	OeCa M	Oe	Ca	1	1
Anogam_AGAP004688-RA	0	0.102692	0.114034	OeCa M	Oe	Ca	1	1
Anogam_AGAP004690-RA	0	0.102193	0.114034	OeCa M	Oe	Ca	1	1
Anogam_AGAP004691-RA	0	0.0977069	0.114034	OeCa M	Oe	Ca	1	1
Anogam_AGAP004693-RA	0	0.0942173	0.114034	OeCa M	Oe	Ca	1	1
Anogam_AGAP004694-RA	0	0.0977069	0.114034	OeCa M	Oe	Ca	1	1
Anogam_AGAP004696-RA	0	0.0982054	0.114034	OeCa M	Oe	Ca	1	1
Anogam_AGAP004698-RA	0	0.082505	0.114034	OeCa M	Oe	Ca	1	1
Anogam_AGAP028436-RA	0	0.108674	0.114034	OeCa M	Oe	Ca	1	1
Anogam_AGAP004704-RA	0	0.103689	0.114034	OeCa M	Oe	Ca	1	1
Anogam_AGAP028437-RA	0	0.100698	0.114034	OeCa M	Oe	Ca	1	1
Anogam_AGAP004708-RA	0	0.104187	0.114034	OeCa M	Oe	Ca	1	1
Anogam_AGAP004710-RA	0	0.0937188	0.114034	OeCa M	Oe	Ca	1	1
Anogam_AGAP004713-RA	0	0.0927218	0.114034	OeCa M	Oe	Ca	1	1
Anogam_AGAP004719-RA	0	0.112164	0.114096	OeCa M	Oe	Ca	1	1
Anogam_AGAP004721-RA	0	0.0967099	0.114034	OeCa M	Oe	Ca	1	1
Anogam_AGAP004722-RA	0	0.109671	0.114034	OeCa M	Oe	Ca	1	1
Anogam_AGAP004726-RA	0	0.105184	0.114034	OeCa M	Oe	Ca	1	1
Anogam_AGAP004728-RA	NA	NA	NA	OeCa M	Oe	Ca	NA	1
Anogam_AGAP004729-RA	0	0.0937188	0.114034	OeCa M	Oe	Ca	1	1
Anogam_AGAP004731-RA	0	0.082505	0.114034	OeCa M	Oe	Ca	1	1
Anogam_AGAP029113-RA	0	0.0947159	0.114034	OeCa M	Oe	Ca	1	1
Anogam_AGAP004735-RA	0	0.102193	0.114034	OeCa M	Oe	Ca	1	1
Anogam_AGAP004738-RA	0	0.106181	0.114034	OeCa M	Oe	Ca	1	1
Anogam_AGAP004740-RA	0	0.0997009	0.114034	OeCa M	Oe	Ca	1	1
Anogam_AGAP004741-RA	0	0.0952144	0.114034	OeCa M	Oe	Ca	1	1
Anogam_AGAP004742-RA	0.0862893	0.0337972	0.114034	OeCa M	Oe	Ca	0.65829	0.572001
Anogam_AGAP004742-RB	-0.0862893	0.0337972	0.114034	OeCa M	Oe	Ca	0.34171	0.427999
Anogam_AGAP004745-RA	0	0.101695	0.114034	OeCa M	Oe	Ca	1	1
Anogam_AGAP004745-RB	0	0.082505	0.114034	OeCa M	Oe	Ca	0	0
Anogam_AGAP004747-RA	0	0.106181	0.114034	OeCa M	Oe	Ca	1	1
Anogam_AGAP004748-RA	0	0.107677	0.114034	OeCa M	Oe	Ca	1	1
Anogam_AGAP004750-RA	0	0.082505	0.114034	OeCa M	Oe	Ca	1	1
Anogam_AGAP004753-RB	0.0542364	0.050349	0.114034	OeCa M	Oe	Ca	0.0542364	0
Anogam_AGAP004753-RA	-0.0542364	0.0408774	0.114034	OeCa M	Oe	Ca	0.945764	1
Anogam_AGAP004756-RA	0	0.107677	0.114034	OeCa M	Oe	Ca	1	1
Anogam_AGAP004758-RC	-0.0139394	0.0787637	0.114034	OeCa M	Oe	Ca	0.0667516	0.080691
Anogam_AGAP004758-RA	0.0167904	0.0762712	0.114034	OeCa M	Oe	Ca	0.921796	0.905005
Anogam_AGAP004758-RB	-0.00285107	0.0927218	0.114034	OeCa M	Oe	Ca	0.0114528	0.0143039
Anogam_AGAP004760-RA	0	0.100199	0.114034	OeCa M	Oe	Ca	1	1
Anogam_AGAP004764-RA	0	0.082505	0.114034	OeCa M	Oe	Ca	1	1
Anogam_AGAP028129-RA	0	0.101196	0.114034	OeCa M	Oe	Ca	1	1
Anogam_AGAP004767-RA	0	0.082505	0.114034	OeCa M	Oe	Ca	1	1
Anogam_AGAP004768-RA	-1.11292e-05	0.111167	0.114034	OeCa M	Oe	Ca	0.999989	1
Anogam_AGAP004768-RB	1.11292e-05	0.0957129	0.114034	OeCa M	Oe	Ca	1.11292e-05	0
Anogam_AGAP004770-RA	0	0.0977069	0.114034	OeCa M	Oe	Ca	1	1
Anogam_AGAP004771-RA	0	0.104686	0.114034	OeCa M	Oe	Ca	1	1
Anogam_AGAP004772-RA	0	0.082505	0.114034	OeCa M	Oe	Ca	1	1
Anogam_AGAP004775-RB	-0.049171	0.0437376	0.114034	OeCa M	Oe	Ca	0.0824073	0.131578
Anogam_AGAP004775-RA	0.049171	0.0608175	0.114034	OeCa M	Oe	Ca	0.917593	0.868422
Anogam_AGAP004777-RA	0	0.082505	0.114034	OeCa M	Oe	Ca	1	1
Anogam_AGAP004780-RA	0	0.082505	0.114034	OeCa M	Oe	Ca	1	1
Anogam_AGAP004781-RA	0	0.082505	0.114034	OeCa M	Oe	Ca	1	1
Anogam_AGAP004782-RA	0	0.082505	0.114034	OeCa M	Oe	Ca	1	1
Anogam_AGAP004783-RA	0	0.0972084	0.114034	OeCa M	Oe	Ca	1	1
Anogam_AGAP028999-RA	NA	NA	NA	OeCa M	Oe	Ca	1	NA
Anogam_AGAP028301-RA	NA	NA	NA	OeCa M	Oe	Ca	1	NA
Anogam_AGAP004787-RA	0	0.082505	0.114034	OeCa M	Oe	Ca	1	1
Anogam_AGAP004789-RA	0	0.082505	0.114034	OeCa M	Oe	Ca	1	1
Anogam_AGAP004791-RA	NA	NA	NA	OeCa M	Oe	Ca	NA	NA
Anogam_AGAP004795-RA	0	0.0937188	0.114034	OeCa M	Oe	Ca	1	1
Anogam_AGAP004797-RA	0	0.082505	0.114034	OeCa M	Oe	Ca	1	1
Anogam_AGAP004798-RA	0	0.082505	0.114034	OeCa M	Oe	Ca	1	1
Anogam_AGAP004799-RA	0	0.0872383	0.114034	OeCa M	Oe	Ca	1	1
Anogam_AGAP004800-RA	0	0.114158	0.115015	OeCa M	Oe	Ca	1	1
Anogam_AGAP004803-RA	0	0.0942173	0.114034	OeCa M	Oe	Ca	1	1
Anogam_AGAP004806-RA	0	0.0922233	0.114034	OeCa M	Oe	Ca	1	1
Anogam_AGAP004808-RA	0	0.082505	0.114034	OeCa M	Oe	Ca	1	1
Anogam_AGAP004809-RA	0	0.082505	0.114034	OeCa M	Oe	Ca	1	1
Anogam_AGAP004810-RA	0	0.0987039	0.114034	OeCa M	Oe	Ca	1	1
Anogam_AGAP004812-RA	0	0.109671	0.114034	OeCa M	Oe	Ca	1	1
Anogam_AGAP004815-RA	0	0.0847458	0.114034	OeCa M	Oe	Ca	1	1
Anogam_AGAP004816-RA	0	0.106181	0.114034	OeCa M	Oe	Ca	1	1
Anogam_AGAP004817-RA	0	0.100199	0.114034	OeCa M	Oe	Ca	1	1
Anogam_AGAP004819-RB	0.040886	0.055334	0.114034	OeCa M	Oe	Ca	0.107052	0.0661661
Anogam_AGAP004819-RA	0.064389	0.0413759	0.114034	OeCa M	Oe	Ca	0.104614	0.0402249
Anogam_AGAP004819-RC	-0.105275	0.0329013	0.114034	OeCa M	Oe	Ca	0.788334	0.893609
Anogam_AGAP004823-RA	0	0.101196	0.114034	OeCa M	Oe	Ca	1	1
Anogam_AGAP004824-RA	0	0.0947159	0.114034	OeCa M	Oe	Ca	1	1
Anogam_AGAP004826-RA	0	0.107178	0.114034	OeCa M	Oe	Ca	1	1
Anogam_AGAP004829-RA	0	0.0932203	0.114034	OeCa M	Oe	Ca	1	1
Anogam_AGAP004830-RA	0	0.100698	0.114034	OeCa M	Oe	Ca	1	1
Anogam_AGAP004830-RB	0	0.104686	0.114034	OeCa M	Oe	Ca	0	0
Anogam_AGAP004832-RA	0	0.109671	0.114034	OeCa M	Oe	Ca	1	1
Anogam_AGAP004834-RA	0.155911	0.0239282	0.114034	OeCa M	Oe	Ca	0.489264	0.333353
Anogam_AGAP004834-RB	-0.155911	0.0218688	0.114034	OeCa M	Oe	Ca	0.510736	0.666647
Anogam_AGAP004836-RA	0	0.082505	0.114034	OeCa M	Oe	Ca	1	1
Anogam_AGAP004837-RA	0	0.0967099	0.114034	OeCa M	Oe	Ca	1	1
Anogam_AGAP004838-RA	0	0.0887338	0.114034	OeCa M	Oe	Ca	1	1
Anogam_AGAP004840-RA	0	0.082505	0.114034	OeCa M	Oe	Ca	1	1
Anogam_AGAP004841-RA	0	0.101196	0.114034	OeCa M	Oe	Ca	1	1
Anogam_AGAP004844-RA	0	0.102193	0.114034	OeCa M	Oe	Ca	1	1
Anogam_AGAP004848-RA	0	0.082505	0.114034	OeCa M	Oe	Ca	1	1
Anogam_AGAP004850-RA	0	0.082505	0.114034	OeCa M	Oe	Ca	1	1
Anogam_AGAP004851-RA	0	0.102193	0.114034	OeCa M	Oe	Ca	1	1
Anogam_AGAP004852-RB	0.125527	0.0219342	0.114034	OeCa M	Oe	Ca	0.430686	0.305159
Anogam_AGAP004852-RA	-0.125527	0.0269192	0.114034	OeCa M	Oe	Ca	0.569314	0.694841
Anogam_AGAP004853-RA	0	0.0932203	0.114034	OeCa M	Oe	Ca	1	1
Anogam_AGAP029106-RA	0	0.0962114	0.114034	OeCa M	Oe	Ca	1	1
Anogam_AGAP004859-RA	0	0.082505	0.114034	OeCa M	Oe	Ca	1	1
Anogam_AGAP004860-RA	0	0.082505	0.114034	OeCa M	Oe	Ca	1	1
Anogam_AGAP004861-RA	0	0.0927218	0.114034	OeCa M	Oe	Ca	1	1
Anogam_AGAP004864-RA	0	0.104686	0.114034	OeCa M	Oe	Ca	1	1
Anogam_AGAP004865-RA	0	0.0957129	0.114034	OeCa M	Oe	Ca	1	1
Anogam_AGAP004866-RA	0	0.0987039	0.114034	OeCa M	Oe	Ca	1	1
Anogam_AGAP004868-RA	0	0.0917248	0.114034	OeCa M	Oe	Ca	1	1
Anogam_AGAP004869-RA	0	0.0947159	0.114034	OeCa M	Oe	Ca	1	1
Anogam_AGAP004872-RA	0	0.108674	0.114034	OeCa M	Oe	Ca	1	1
Anogam_AGAP004873-RA	0	0.0977069	0.114034	OeCa M	Oe	Ca	1	1
Anogam_AGAP004874-RA	0	0.082505	0.114034	OeCa M	Oe	Ca	1	1
Anogam_AGAP004875-RA	NA	NA	NA	OeCa M	Oe	Ca	1	NA
Anogam_AGAP004878-RA	0	0.082505	0.114034	OeCa M	Oe	Ca	1	1
Anogam_AGAP004882-RA	0	0.082505	0.114034	OeCa M	Oe	Ca	1	1
Anogam_AGAP004884-RA	0	0.082505	0.114034	OeCa M	Oe	Ca	1	1
Anogam_AGAP004886-RA	-0.055252	0.051346	0.114034	OeCa M	Oe	Ca	0.0431926	0.0984446
Anogam_AGAP004886-RB	0.055252	0.0407555	0.114034	OeCa M	Oe	Ca	0.956807	0.901555
Anogam_AGAP004887-RA	0	0.104686	0.114034	OeCa M	Oe	Ca	1	1
Anogam_AGAP004889-RA	0	0.109172	0.114034	OeCa M	Oe	Ca	1	1
Anogam_AGAP004891-RA	0	0.107178	0.114034	OeCa M	Oe	Ca	1	1
Anogam_AGAP004893-RA	NA	NA	NA	OeCa M	Oe	Ca	NA	1
Anogam_AGAP004894-RA	0	0.0812562	0.114034	OeCa M	Oe	Ca	1	1
Anogam_AGAP004895-RA	0	0.104686	0.114034	OeCa M	Oe	Ca	1	1
Anogam_AGAP004896-RA	0.014888	0.0727817	0.114034	OeCa M	Oe	Ca	1	0.985112
Anogam_AGAP004896-RB	-0.014888	0.0762712	0.114034	OeCa M	Oe	Ca	0	0.014888
Anogam_AGAP028438-RA	0	0.082505	0.114034	OeCa M	Oe	Ca	1	1
Anogam_AGAP004900-RA	0	0.082505	0.114034	OeCa M	Oe	Ca	1	1
Anogam_AGAP004901-RA	0	0.082505	0.114034	OeCa M	Oe	Ca	1	1
Anogam_AGAP004903-RA	0	0.082505	0.114034	OeCa M	Oe	Ca	1	1
Anogam_AGAP004908-RA	0	0.0952144	0.114034	OeCa M	Oe	Ca	1	1
Anogam_AGAP004910-RA	0	0.0992024	0.114034	OeCa M	Oe	Ca	1	1
Anogam_AGAP004911-RA	0	0.102193	0.114034	OeCa M	Oe	Ca	1	1
Anogam_AGAP004916-RA	0	0.106181	0.114034	OeCa M	Oe	Ca	1	1
Anogam_AGAP004917-RA	0	0.0937188	0.114034	OeCa M	Oe	Ca	1	1
Anogam_AGAP004918-RA	0	0.082505	0.114034	OeCa M	Oe	Ca	1	1
Anogam_AGAP028439-RA	0	0.0992024	0.114034	OeCa M	Oe	Ca	1	1
Anogam_AGAP004921-RA	0	0.0852443	0.114034	OeCa M	Oe	Ca	1	1
Anogam_AGAP004922-RA	0	0.0902293	0.114034	OeCa M	Oe	Ca	1	1
Anogam_AGAP004923-RA	0	0.0912263	0.114034	OeCa M	Oe	Ca	1	1
Anogam_AGAP004924-RA	0	0.082505	0.114034	OeCa M	Oe	Ca	1	1
Anogam_AGAP004925-RA	0	0.100698	0.114034	OeCa M	Oe	Ca	1	1
Anogam_AGAP004928-RA	0	0.0987039	0.114034	OeCa M	Oe	Ca	1	1
Anogam_AGAP004933-RA	0	0.0892323	0.114034	OeCa M	Oe	Ca	1	1
Anogam_AGAP004934-RA	0	0.0997009	0.114034	OeCa M	Oe	Ca	1	1
Anogam_AGAP004937-RA	0	0.108175	0.114034	OeCa M	Oe	Ca	1	1
Anogam_AGAP004938-RA	0	0.0952144	0.114034	OeCa M	Oe	Ca	1	1
Anogam_AGAP004941-RA	0	0.10668	0.114034	OeCa M	Oe	Ca	1	1
Anogam_AGAP004942-RA	0	0.0977069	0.114034	OeCa M	Oe	Ca	1	1
Anogam_AGAP004944-RA	0	0.0917248	0.114034	OeCa M	Oe	Ca	1	1
Anogam_AGAP004945-RA	0	0.0947159	0.114034	OeCa M	Oe	Ca	1	1
Anogam_AGAP004946-RA	0	0.082505	0.114034	OeCa M	Oe	Ca	1	1
Anogam_AGAP004948-RA	0	0.0957129	0.114034	OeCa M	Oe	Ca	1	1
Anogam_AGAP004951-RA	NA	NA	NA	OeCa M	Oe	Ca	NA	NA
Anogam_AGAP004953-RA	0	0.0977069	0.114034	OeCa M	Oe	Ca	1	1
Anogam_AGAP004954-RA	0	0.104187	0.114034	OeCa M	Oe	Ca	1	1
Anogam_AGAP004956-RA	0	0.0897308	0.114034	OeCa M	Oe	Ca	1	1
Anogam_AGAP004958-RA	0	0.105184	0.114034	OeCa M	Oe	Ca	1	1
Anogam_AGAP004960-RA	0	0.0952144	0.114034	OeCa M	Oe	Ca	1	1
Anogam_AGAP004962-RA	0	0.0907278	0.114034	OeCa M	Oe	Ca	1	1
Anogam_AGAP004964-RA	0	0.105683	0.114034	OeCa M	Oe	Ca	1	1
Anogam_AGAP004968-RA	0	0.10319	0.114034	OeCa M	Oe	Ca	1	1
Anogam_AGAP004972-RA	0	0.0992024	0.114034	OeCa M	Oe	Ca	1	1
Anogam_AGAP004975-RA	0	0.082505	0.114034	OeCa M	Oe	Ca	1	1
Anogam_AGAP004976-RA	0	0.102692	0.114034	OeCa M	Oe	Ca	1	1
Anogam_AGAP004977-RA	0	0.0982054	0.114034	OeCa M	Oe	Ca	1	1
Anogam_AGAP004978-RA	0	0.0822532	0.114034	OeCa M	Oe	Ca	1	1
Anogam_AGAP004979-RA	NA	NA	NA	OeCa M	Oe	Ca	NA	1
Anogam_AGAP004980-RA	0	0.082505	0.114034	OeCa M	Oe	Ca	1	1
Anogam_AGAP004981-RA	0	0.105184	0.114034	OeCa M	Oe	Ca	1	1
Anogam_AGAP004982-RA	0	0.082505	0.114034	OeCa M	Oe	Ca	1	1
Anogam_AGAP004983-RA	0	0.082505	0.114034	OeCa M	Oe	Ca	1	1
Anogam_AGAP004985-RA	0	0.082505	0.114034	OeCa M	Oe	Ca	1	1
Anogam_AGAP004989-RA	0	0.103689	0.114034	OeCa M	Oe	Ca	1	1
Anogam_AGAP004989-RB	0	0.100199	0.114034	OeCa M	Oe	Ca	0	0
Anogam_AGAP004991-RA	0	0.0942173	0.114034	OeCa M	Oe	Ca	1	1
Anogam_AGAP004994-RA	NA	NA	NA	OeCa M	Oe	Ca	NA	1
Anogam_AGAP004995-RA	0	0.082505	0.114034	OeCa M	Oe	Ca	1	1
Anogam_AGAP004996-RA	NA	NA	NA	OeCa M	Oe	Ca	NA	1
Anogam_AGAP004999-RA	NA	NA	NA	OeCa M	Oe	Ca	NA	1
Anogam_AGAP005001-RA	1	0.000498504	0.114034	OeCa M	Oe	Ca	1	0
Anogam_AGAP005001-RB	-1	0.000498504	0.114034	OeCa M	Oe	Ca	0	1
Anogam_AGAP005002-RA	-0.500694	0.00697906	0.114034	OeCa M	Oe	Ca	0.432017	0.93271
Anogam_AGAP005002-RB	0.500694	0.000994036	0.114034	OeCa M	Oe	Ca	0.567983	0.0672896
Anogam_AGAP005003-RA	0	0.082505	0.114034	OeCa M	Oe	Ca	1	1
Anogam_AGAP005007-RA	0	0.112164	0.114096	OeCa M	Oe	Ca	1	1
Anogam_AGAP005008-RA	0.180512	0.0188867	0.114034	OeCa M	Oe	Ca	0.883741	0.70323
Anogam_AGAP005008-RB	-0.180512	0.0179462	0.114034	OeCa M	Oe	Ca	0.116259	0.29677
Anogam_AGAP005013-RA	0	0.10319	0.114034	OeCa M	Oe	Ca	1	1
Anogam_AGAP005015-RA	0	0.082505	0.114034	OeCa M	Oe	Ca	1	1
Anogam_AGAP028754-RA	NA	NA	NA	OeCa M	Oe	Ca	1	NA
Anogam_AGAP005018-RA	0	0.082505	0.114034	OeCa M	Oe	Ca	1	1
Anogam_AGAP005020-RA	0	0.082505	0.114034	OeCa M	Oe	Ca	1	1
Anogam_AGAP005021-RA	0	0.082505	0.114034	OeCa M	Oe	Ca	1	1
Anogam_AGAP005023-RA	0	0.104187	0.114034	OeCa M	Oe	Ca	1	1
Anogam_AGAP005025-RA	0	0.082505	0.114034	OeCa M	Oe	Ca	1	1
Anogam_AGAP005027-RA	0	0.0992024	0.114034	OeCa M	Oe	Ca	1	1
Anogam_AGAP005030-RA	0	0.0992024	0.114034	OeCa M	Oe	Ca	1	1
Anogam_AGAP005031-RA	-0.0233201	0.0757727	0.114034	OeCa M	Oe	Ca	0.921655	0.944975
Anogam_AGAP005031-RB	0.0233201	0.0782652	0.114034	OeCa M	Oe	Ca	0.078345	0.0550249
Anogam_AGAP005033-RA	0	0.082505	0.114034	OeCa M	Oe	Ca	1	1
Anogam_AGAP005034-RA	0	0.082505	0.114034	OeCa M	Oe	Ca	1	1
Anogam_AGAP005035-RA	0	0.0922233	0.114034	OeCa M	Oe	Ca	1	1
Anogam_AGAP005036-RA	0	0.082505	0.114034	OeCa M	Oe	Ca	1	1
Anogam_AGAP005037-RA	-0.550244	0.00498504	0.114034	OeCa M	Oe	Ca	0.105842	0.656086
Anogam_AGAP005037-RB	0.550244	0.00348953	0.114034	OeCa M	Oe	Ca	0.894158	0.343914
Anogam_AGAP005039-RA	0	0.0882353	0.114034	OeCa M	Oe	Ca	1	1
Anogam_AGAP005040-RA	0	0.0902293	0.114034	OeCa M	Oe	Ca	1	1
Anogam_AGAP005041-RA	0	0.104187	0.114034	OeCa M	Oe	Ca	1	1
Anogam_AGAP005043-RA	-0.0170896	0.0596421	0.114034	OeCa M	Oe	Ca	0	0.0170896
Anogam_AGAP005043-RB	0.0170896	0.0772682	0.114034	OeCa M	Oe	Ca	1	0.98291
Anogam_AGAP005044-RB	0.115344	0.0269192	0.114034	OeCa M	Oe	Ca	0.211207	0.0958636
Anogam_AGAP005044-RA	-0.115344	0.0199402	0.114034	OeCa M	Oe	Ca	0.788793	0.904136
Anogam_AGAP005047-RA	NA	NA	NA	OeCa M	Oe	Ca	NA	1
Anogam_AGAP005049-RA	0	0.111665	0.114034	OeCa M	Oe	Ca	1	1
Anogam_AGAP005051-RA	0	0.112164	0.114096	OeCa M	Oe	Ca	1	1
Anogam_AGAP005053-RA	0	0.0992024	0.114034	OeCa M	Oe	Ca	1	1
Anogam_AGAP005054-RA	0.173262	0.0184447	0.114034	OeCa M	Oe	Ca	0.688884	0.515623
Anogam_AGAP005054-RB	-0.173262	0.0194417	0.114034	OeCa M	Oe	Ca	0.311116	0.484377
Anogam_AGAP005056-RA	0	0.082505	0.114034	OeCa M	Oe	Ca	1	1
Anogam_AGAP005059-RA	0	0.0932203	0.114034	OeCa M	Oe	Ca	1	1
Anogam_AGAP005060-RA	0	0.100199	0.114034	OeCa M	Oe	Ca	1	1
Anogam_AGAP005063-RA	0	0.101695	0.114034	OeCa M	Oe	Ca	1	1
Anogam_AGAP028441-RA	0	0.082505	0.114034	OeCa M	Oe	Ca	1	1
Anogam_AGAP005067-RA	NA	NA	NA	OeCa M	Oe	Ca	NA	NA
Anogam_AGAP005068-RA	0	0.0892323	0.114034	OeCa M	Oe	Ca	1	1
Anogam_AGAP005070-RA	0	0.10668	0.114034	OeCa M	Oe	Ca	1	1
Anogam_AGAP005071-RB	-0.245949	0.0129611	0.114034	OeCa M	Oe	Ca	0.118267	0.364216
Anogam_AGAP005071-RA	0.245949	0.0124626	0.114034	OeCa M	Oe	Ca	0.881733	0.635784
Anogam_AGAP005072-RA	0	0.0992024	0.114034	OeCa M	Oe	Ca	1	1
Anogam_AGAP005080-RA	0	0.101196	0.114034	OeCa M	Oe	Ca	1	1
Anogam_AGAP005092-RA	NA	NA	NA	OeCa M	Oe	Ca	NA	1
Anogam_AGAP005094-RA	0	0.082505	0.114034	OeCa M	Oe	Ca	1	1
Anogam_AGAP005096-RA	NA	NA	NA	OeCa M	Oe	Ca	NA	1
Anogam_AGAP005098-RA	0	0.082505	0.114034	OeCa M	Oe	Ca	1	1
Anogam_AGAP005101-RA	0	0.104187	0.114034	OeCa M	Oe	Ca	1	1
Anogam_AGAP005102-RA	0	0.082505	0.114034	OeCa M	Oe	Ca	1	1
Anogam_AGAP005103-RA	0	0.082505	0.114034	OeCa M	Oe	Ca	1	1
Anogam_AGAP028443-RA	0	0.10668	0.114034	OeCa M	Oe	Ca	1	1
Anogam_AGAP005107-RA	0	0.0832502	0.114034	OeCa M	Oe	Ca	1	1
Anogam_AGAP028444-RA	0	0.082505	0.114034	OeCa M	Oe	Ca	1	1
Anogam_AGAP005109-RA	0	0.082505	0.114034	OeCa M	Oe	Ca	1	1
Anogam_AGAP005113-RA	0	0.0862413	0.114034	OeCa M	Oe	Ca	1	1
Anogam_AGAP005114-RB	0.077309	0.0398804	0.114034	OeCa M	Oe	Ca	0.870137	0.792828
Anogam_AGAP005114-RA	-0.077309	0.0443669	0.114034	OeCa M	Oe	Ca	0.129863	0.207172
Anogam_AGAP005115-RA	0	0.107677	0.114034	OeCa M	Oe	Ca	1	1
Anogam_AGAP005117-RA	0	0.109671	0.114034	OeCa M	Oe	Ca	1	1
Anogam_AGAP005119-RA	0	0.082505	0.114034	OeCa M	Oe	Ca	1	1
Anogam_AGAP005120-RA	0	0.0907278	0.114034	OeCa M	Oe	Ca	1	1
Anogam_AGAP005122-RA	0	0.0952144	0.114034	OeCa M	Oe	Ca	1	1
Anogam_AGAP005123-RA	0	0.111167	0.114034	OeCa M	Oe	Ca	1	1
Anogam_AGAP005124-RA	0.153118	0.0214357	0.114034	OeCa M	Oe	Ca	0.327821	0.174703
Anogam_AGAP005124-RB	-0.0974718	0.0254237	0.114034	OeCa M	Oe	Ca	0.514308	0.61178
Anogam_AGAP005124-RC	-0.0556466	0.0493519	0.114034	OeCa M	Oe	Ca	0.15787	0.213517
Anogam_AGAP005125-RA	0	0.104187	0.114034	OeCa M	Oe	Ca	1	1
Anogam_AGAP005126-RA	0	0.0882353	0.114034	OeCa M	Oe	Ca	1	1
Anogam_AGAP005127-RA	0	0.10319	0.114034	OeCa M	Oe	Ca	1	1
Anogam_AGAP005129-RA	0	0.0932203	0.114034	OeCa M	Oe	Ca	1	1
Anogam_AGAP005131-RA	0	0.0972084	0.114034	OeCa M	Oe	Ca	1	1
Anogam_AGAP005133-RA	0	0.082505	0.114034	OeCa M	Oe	Ca	1	1
Anogam_AGAP005135-RA	0	0.082505	0.114034	OeCa M	Oe	Ca	1	1
Anogam_AGAP005137-RA	0	0.109671	0.114034	OeCa M	Oe	Ca	1	1
Anogam_AGAP005138-RA	0	0.105683	0.114034	OeCa M	Oe	Ca	1	1
Anogam_AGAP005139-RA	0	0.108674	0.114034	OeCa M	Oe	Ca	1	1
Anogam_AGAP005143-RA	0	0.082505	0.114034	OeCa M	Oe	Ca	1	1
Anogam_AGAP005147-RB	0.0462568	0.0568295	0.114034	OeCa M	Oe	Ca	0.0871777	0.040921
Anogam_AGAP005147-RA	-0.0462568	0.0508475	0.114034	OeCa M	Oe	Ca	0.912822	0.959079
Anogam_AGAP005149-RA	0	0.10668	0.114034	OeCa M	Oe	Ca	1	1
Anogam_AGAP005150-RA	0	0.100199	0.114034	OeCa M	Oe	Ca	1	1
Anogam_AGAP005156-RA	0	0.105683	0.114034	OeCa M	Oe	Ca	1	1
Anogam_AGAP005158-RA	0	0.0987039	0.114034	OeCa M	Oe	Ca	1	1
Anogam_AGAP005159-RA	0	0.109671	0.114034	OeCa M	Oe	Ca	1	1
Anogam_AGAP005160-RD	0.0470772	0.05334	0.114034	OeCa M	Oe	Ca	0.157542	0.110465
Anogam_AGAP005160-RE	0.0292439	0.0526839	0.114034	OeCa M	Oe	Ca	0.612645	0.583401
Anogam_AGAP005160-RB	-0.0188868	0.0586481	0.114034	OeCa M	Oe	Ca	0.0928036	0.11169
Anogam_AGAP005160-RA	-0.00416866	0.0962114	0.114034	OeCa M	Oe	Ca	0.0342599	0.0384285
Anogam_AGAP005160-RC	-0.0532656	0.0433699	0.114034	OeCa M	Oe	Ca	0.10275	0.156015
Anogam_AGAP005162-RA	-0.139595	0.0204387	0.114034	OeCa M	Oe	Ca	0.264222	0.403818
Anogam_AGAP005162-RB	0.139595	0.0229312	0.114034	OeCa M	Oe	Ca	0.735778	0.596182
Anogam_AGAP005164-RA	0	0.100698	0.114034	OeCa M	Oe	Ca	1	1
Anogam_AGAP005165-RA	0	0.110668	0.114034	OeCa M	Oe	Ca	1	1
Anogam_AGAP005170-RA	0	0.0962114	0.114034	OeCa M	Oe	Ca	1	1
Anogam_AGAP005171-RA	0	0.082505	0.114034	OeCa M	Oe	Ca	1	1
Anogam_AGAP005173-RA	0	0.0937188	0.114034	OeCa M	Oe	Ca	1	1
Anogam_AGAP005174-RA	0	0.100199	0.114034	OeCa M	Oe	Ca	1	1
Anogam_AGAP005178-RA	0	0.0987039	0.114034	OeCa M	Oe	Ca	1	1
Anogam_AGAP005180-RA	0	0.0947159	0.114034	OeCa M	Oe	Ca	1	1
Anogam_AGAP005181-RA	0	0.110668	0.114034	OeCa M	Oe	Ca	1	1
Anogam_AGAP005183-RA	0	0.111665	0.114034	OeCa M	Oe	Ca	1	1
Anogam_AGAP005189-RA	0	0.107178	0.114034	OeCa M	Oe	Ca	1	1
Anogam_AGAP005190-RA	0	0.082505	0.114034	OeCa M	Oe	Ca	1	1
Anogam_AGAP005192-RA	0	0.10319	0.114034	OeCa M	Oe	Ca	1	1
Anogam_AGAP005194-RA	0	0.103689	0.114034	OeCa M	Oe	Ca	1	1
Anogam_AGAP005195-RA	0	0.0952144	0.114034	OeCa M	Oe	Ca	1	1
Anogam_AGAP005196-RA	0	0.101695	0.114034	OeCa M	Oe	Ca	1	1
Anogam_AGAP005197-RA	0	0.082505	0.114034	OeCa M	Oe	Ca	1	1
Anogam_AGAP005199-RA	0.220503	0.0119284	0.114034	OeCa M	Oe	Ca	0.91383	0.693327
Anogam_AGAP005199-RB	-0.220503	0.0129611	0.114034	OeCa M	Oe	Ca	0.0861702	0.306673
Anogam_AGAP005200-RA	0	0.0987039	0.114034	OeCa M	Oe	Ca	1	1
Anogam_AGAP005201-RA	0	0.0862413	0.114034	OeCa M	Oe	Ca	1	1
Anogam_AGAP005203-RC	-0.0469226	0.0518445	0.114034	OeCa M	Oe	Ca	0.205128	0.252051
Anogam_AGAP005203-RJ	0.00226586	0.0745527	0.114034	OeCa M	Oe	Ca	0.0198288	0.0175629
Anogam_AGAP005203-RD	-0.175791	0.0169492	0.114034	OeCa M	Oe	Ca	0.141833	0.317624
Anogam_AGAP005203-RH	0	0.100199	0.114034	OeCa M	Oe	Ca	0	0
Anogam_AGAP005203-RE	0	0.105184	0.114034	OeCa M	Oe	Ca	0	0
Anogam_AGAP005203-RF	-0.0421842	0.0538385	0.114034	OeCa M	Oe	Ca	0.176593	0.218777
Anogam_AGAP005203-RA	0.262632	0.0169492	0.114034	OeCa M	Oe	Ca	0.456617	0.193985
Anogam_AGAP005203-RB	0	0.0987039	0.114034	OeCa M	Oe	Ca	0	0
Anogam_AGAP005205-RC	-0.0141397	0.0802592	0.114034	OeCa M	Oe	Ca	0.0378528	0.0519925
Anogam_AGAP005205-RB	0.0711323	0.0368893	0.114034	OeCa M	Oe	Ca	0.582987	0.511855
Anogam_AGAP005205-RA	-0.0569925	0.050349	0.114034	OeCa M	Oe	Ca	0.37916	0.436153
Anogam_AGAP005207-RA	0	0.0972084	0.114034	OeCa M	Oe	Ca	1	1
Anogam_AGAP005209-RA	0	0.0922233	0.114034	OeCa M	Oe	Ca	1	1
Anogam_AGAP005211-RA	0	0.0912263	0.114034	OeCa M	Oe	Ca	1	1
Anogam_AGAP005213-RA	0.258271	0.0124626	0.114034	OeCa M	Oe	Ca	0.858709	0.600438
Anogam_AGAP005213-RD	-0.0208789	0.0692921	0.114034	OeCa M	Oe	Ca	0.141291	0.16217
Anogam_AGAP005213-RF	0	0.0957129	0.114034	OeCa M	Oe	Ca	0	0
Anogam_AGAP005213-RB	-0.237392	0.0109671	0.114034	OeCa M	Oe	Ca	0	0.237392
Anogam_AGAP005214-RA	NA	NA	NA	OeCa M	Oe	Ca	NA	NA
Anogam_AGAP005215-RA	0	0.108175	0.114034	OeCa M	Oe	Ca	1	1
Anogam_AGAP005217-RA	0	0.117149	0.117225	OeCa M	Oe	Ca	1	1
Anogam_AGAP005218-RA	0	0.100199	0.114034	OeCa M	Oe	Ca	1	1
Anogam_AGAP005220-RA	0	0.0972084	0.114034	OeCa M	Oe	Ca	1	1
Anogam_AGAP005225-RA	0	0.0912263	0.114034	OeCa M	Oe	Ca	1	1
Anogam_AGAP005226-RA	0	0.0992024	0.114034	OeCa M	Oe	Ca	1	1
Anogam_AGAP013141-RA	0	0.082505	0.114034	OeCa M	Oe	Ca	1	1
Anogam_AGAP005228-RA	0	0.082505	0.114034	OeCa M	Oe	Ca	1	1
Anogam_AGAP005229-RA	0	0.100199	0.114034	OeCa M	Oe	Ca	1	1
Anogam_AGAP005230-RA	0	0.082505	0.114034	OeCa M	Oe	Ca	1	1
Anogam_AGAP005231-RA	0	0.082505	0.114034	OeCa M	Oe	Ca	1	1
Anogam_AGAP005233-RA	0	0.082505	0.114034	OeCa M	Oe	Ca	1	1
Anogam_AGAP005234-RA	-0.00472357	0.0735586	0.114034	OeCa M	Oe	Ca	0.374294	0.379018
Anogam_AGAP005234-RB	0.00472357	0.0857428	0.114034	OeCa M	Oe	Ca	0.625706	0.620982
Anogam_AGAP005235-RA	0	0.100199	0.114034	OeCa M	Oe	Ca	1	1
Anogam_AGAP005236-RA	0	0.0967099	0.114034	OeCa M	Oe	Ca	1	1
Anogam_AGAP005239-RA	0	0.107677	0.114034	OeCa M	Oe	Ca	1	1
Anogam_AGAP005243-RA	0	0.106181	0.114034	OeCa M	Oe	Ca	1	1
Anogam_AGAP005244-RB	0.0826214	0.0337972	0.114034	OeCa M	Oe	Ca	0.36189	0.279269
Anogam_AGAP005244-RA	-0.0826214	0.0348953	0.114034	OeCa M	Oe	Ca	0.63811	0.720731
Anogam_AGAP005246-RE	-0.0134164	0.0817547	0.114034	OeCa M	Oe	Ca	0.399676	0.413092
Anogam_AGAP005246-RC	-0.026886	0.0757727	0.114034	OeCa M	Oe	Ca	0.0821494	0.109035
Anogam_AGAP005246-RD	0.0577763	0.0397614	0.114034	OeCa M	Oe	Ca	0.437363	0.379587
Anogam_AGAP005246-RA	-0.0174738	0.0596421	0.114034	OeCa M	Oe	Ca	0.0808117	0.0982855
Anogam_AGAP005249-RA	0	0.0992024	0.114034	OeCa M	Oe	Ca	1	1
Anogam_AGAP005252-RA	0	0.0977069	0.114034	OeCa M	Oe	Ca	1	1
Anogam_AGAP005254-RA	-0.666667	0.000994036	0.114034	OeCa M	Oe	Ca	0.333333	1
Anogam_AGAP005254-RB	0.666667	0.00398804	0.114034	OeCa M	Oe	Ca	0.666667	0
Anogam_AGAP005255-RA	0	0.0952144	0.114034	OeCa M	Oe	Ca	1	1
Anogam_AGAP005256-RA	NA	NA	NA	OeCa M	Oe	Ca	1	NA
Anogam_AGAP005259-RA	0	0.106181	0.114034	OeCa M	Oe	Ca	1	1
Anogam_AGAP005260-RA	0	0.082505	0.114034	OeCa M	Oe	Ca	1	1
Anogam_AGAP005262-RA	0	0.0967099	0.114034	OeCa M	Oe	Ca	1	1
Anogam_AGAP005264-RA	0	0.0917248	0.114034	OeCa M	Oe	Ca	1	1
Anogam_AGAP005265-RA	0	0.082505	0.114034	OeCa M	Oe	Ca	1	1
Anogam_AGAP005266-RA	0	0.102692	0.114034	OeCa M	Oe	Ca	1	1
Anogam_AGAP005268-RA	0	0.0922233	0.114034	OeCa M	Oe	Ca	1	1
Anogam_AGAP005269-RA	0	0.0822532	0.114034	OeCa M	Oe	Ca	1	1
Anogam_AGAP005270-RA	0	0.0967099	0.114034	OeCa M	Oe	Ca	1	1
Anogam_AGAP005274-RA	0	0.082505	0.114034	OeCa M	Oe	Ca	1	1
Anogam_AGAP005277-RA	0	0.0932203	0.114034	OeCa M	Oe	Ca	1	1
Anogam_AGAP005281-RA	0	0.0937188	0.114034	OeCa M	Oe	Ca	1	1
Anogam_AGAP005287-RA	0	0.0997009	0.114034	OeCa M	Oe	Ca	1	1
Anogam_AGAP005290-RA	0	0.109671	0.114034	OeCa M	Oe	Ca	1	1
Anogam_AGAP005292-RA	0	0.082505	0.114034	OeCa M	Oe	Ca	1	1
Anogam_AGAP005295-RA	0	0.082505	0.114034	OeCa M	Oe	Ca	1	1
Anogam_AGAP005298-RA	0	0.0957129	0.114034	OeCa M	Oe	Ca	1	1
Anogam_AGAP005300-RC	-0.0607206	0.0498504	0.114034	OeCa M	Oe	Ca	0.0798389	0.14056
Anogam_AGAP005300-RA	-0.0502232	0.0568295	0.114034	OeCa M	Oe	Ca	0.251127	0.30135
Anogam_AGAP005300-RB	0.110944	0.0209372	0.114034	OeCa M	Oe	Ca	0.669034	0.558091
Anogam_AGAP005301-RA	0	0.0997009	0.114034	OeCa M	Oe	Ca	1	1
Anogam_AGAP005306-RA	0	0.102692	0.114034	OeCa M	Oe	Ca	1	1
Anogam_AGAP029009-RA	0	0.0982054	0.114034	OeCa M	Oe	Ca	1	1
Anogam_AGAP005308-RA	0	0.082505	0.114034	OeCa M	Oe	Ca	1	1
Anogam_AGAP005311-RA	0	0.0987039	0.114034	OeCa M	Oe	Ca	1	1
Anogam_AGAP005312-RA	0	0.082505	0.114034	OeCa M	Oe	Ca	1	1
Anogam_AGAP005314-RA	0	0.103689	0.114034	OeCa M	Oe	Ca	1	1
Anogam_AGAP005315-RA	0	0.0947159	0.114034	OeCa M	Oe	Ca	1	1
Anogam_AGAP005316-RA	0	0.082505	0.114034	OeCa M	Oe	Ca	1	1
Anogam_AGAP005317-RA	0	0.105184	0.114034	OeCa M	Oe	Ca	1	1
Anogam_AGAP005318-RA	0	0.0867398	0.114034	OeCa M	Oe	Ca	1	1
Anogam_AGAP005321-RA	0	0.10319	0.114034	OeCa M	Oe	Ca	1	1
Anogam_AGAP005328-RA	0	0.0842473	0.114034	OeCa M	Oe	Ca	1	1
Anogam_AGAP005329-RA	0	0.0912263	0.114034	OeCa M	Oe	Ca	1	1
Anogam_AGAP005330-RA	0	0.108175	0.114034	OeCa M	Oe	Ca	1	1
Anogam_AGAP005331-RA	0	0.0987039	0.114034	OeCa M	Oe	Ca	1	1
Anogam_AGAP005335-RA	0	0.106181	0.114034	OeCa M	Oe	Ca	1	1
Anogam_AGAP005337-RA	0	0.0972084	0.114034	OeCa M	Oe	Ca	1	1
Anogam_AGAP005338-RA	0	0.113659	0.11468	OeCa M	Oe	Ca	1	1
Anogam_AGAP005339-RA	0	0.110668	0.114034	OeCa M	Oe	Ca	1	1
Anogam_AGAP005340-RA	0	0.0962114	0.114034	OeCa M	Oe	Ca	1	1
Anogam_AGAP005341-RB	0.0506484	0.0508475	0.114034	OeCa M	Oe	Ca	0.142357	0.0917081
Anogam_AGAP005341-RA	-0.0506484	0.0458624	0.114034	OeCa M	Oe	Ca	0.857643	0.908292
Anogam_AGAP005342-RA	0	0.0937188	0.114034	OeCa M	Oe	Ca	1	1
Anogam_AGAP005343-RA	0	0.082505	0.114034	OeCa M	Oe	Ca	1	1
Anogam_AGAP005347-RA	0	0.100199	0.114034	OeCa M	Oe	Ca	1	1
Anogam_AGAP005348-RA	0	0.0982054	0.114034	OeCa M	Oe	Ca	1	1
Anogam_AGAP005351-RA	0	0.105184	0.114034	OeCa M	Oe	Ca	1	1
Anogam_AGAP005353-RA	0	0.0987039	0.114034	OeCa M	Oe	Ca	1	1
Anogam_AGAP005362-RA	0	0.100199	0.114034	OeCa M	Oe	Ca	1	1
Anogam_AGAP005363-RA	0	0.0837488	0.114034	OeCa M	Oe	Ca	1	1
Anogam_AGAP005365-RA	0	0.104187	0.114034	OeCa M	Oe	Ca	1	1
Anogam_AGAP005368-RA	0	0.10319	0.114034	OeCa M	Oe	Ca	1	1
Anogam_AGAP005369-RA	0.0153135	0.0762712	0.114034	OeCa M	Oe	Ca	0.191903	0.176589
Anogam_AGAP005369-RB	-0.0153135	0.0596421	0.114034	OeCa M	Oe	Ca	0.808097	0.823411
Anogam_AGAP005370-RA	0	0.082505	0.114034	OeCa M	Oe	Ca	1	1
Anogam_AGAP005371-RA	0	0.082505	0.114034	OeCa M	Oe	Ca	1	1
Anogam_AGAP005372-RA	0	0.082505	0.114034	OeCa M	Oe	Ca	1	1
Anogam_AGAP005373-RA	0	0.082505	0.114034	OeCa M	Oe	Ca	1	1
Anogam_AGAP005376-RA	0	0.082505	0.114034	OeCa M	Oe	Ca	1	1
Anogam_AGAP005378-RA	0.516966	0.000994036	0.114034	OeCa M	Oe	Ca	0.924024	0.407058
Anogam_AGAP005378-RB	-0.437691	0.00397614	0.114034	OeCa M	Oe	Ca	0.0759759	0.513666
Anogam_AGAP005378-RC	-0.0792753	0.0314058	0.114034	OeCa M	Oe	Ca	0	0.0792753
Anogam_AGAP005381-RA	-0.0350041	0.0613161	0.114034	OeCa M	Oe	Ca	0.212758	0.247762
Anogam_AGAP005381-RB	0.00572963	0.0847458	0.114034	OeCa M	Oe	Ca	0.24953	0.2438
Anogam_AGAP005381-RC	0.0292745	0.0526839	0.114034	OeCa M	Oe	Ca	0.537712	0.508438
Anogam_AGAP005383-RA	0	0.082505	0.114034	OeCa M	Oe	Ca	1	1
Anogam_AGAP005384-RA	0	0.0987039	0.114034	OeCa M	Oe	Ca	1	1
Anogam_AGAP005385-RA	0	0.100698	0.114034	OeCa M	Oe	Ca	1	1
Anogam_AGAP005387-RA	0	0.105683	0.114034	OeCa M	Oe	Ca	1	1
Anogam_AGAP005388-RA	0	0.082505	0.114034	OeCa M	Oe	Ca	1	1
Anogam_AGAP005389-RA	0	0.0847458	0.114034	OeCa M	Oe	Ca	1	1
Anogam_AGAP005390-RA	NA	NA	NA	OeCa M	Oe	Ca	NA	0.707531
Anogam_AGAP005390-RB	NA	NA	NA	OeCa M	Oe	Ca	NA	0.292469
Anogam_AGAP005392-RA	0	0.100698	0.114034	OeCa M	Oe	Ca	1	1
Anogam_AGAP005394-RA	0	0.104187	0.114034	OeCa M	Oe	Ca	1	1
Anogam_AGAP005401-RA	0	0.082505	0.114034	OeCa M	Oe	Ca	1	1
Anogam_AGAP005403-RA	0	0.101196	0.114034	OeCa M	Oe	Ca	1	1
Anogam_AGAP005404-RA	0	0.0937188	0.114034	OeCa M	Oe	Ca	1	1
Anogam_AGAP005405-RA	0	0.0902293	0.114034	OeCa M	Oe	Ca	1	1
Anogam_AGAP005406-RA	0	0.0927218	0.114034	OeCa M	Oe	Ca	1	1
Anogam_AGAP005408-RA	0	0.0897308	0.114034	OeCa M	Oe	Ca	1	1
Anogam_AGAP005409-RA	0	0.082505	0.114034	OeCa M	Oe	Ca	1	1
Anogam_AGAP005411-RB	0.19104	0.0149105	0.114034	OeCa M	Oe	Ca	0.359478	0.168438
Anogam_AGAP005411-RA	-0.19104	0.0129611	0.114034	OeCa M	Oe	Ca	0.640522	0.831562
Anogam_AGAP005412-RA	0	0.0922233	0.114034	OeCa M	Oe	Ca	1	1
Anogam_AGAP005414-RA	0	0.082505	0.114034	OeCa M	Oe	Ca	1	1
Anogam_AGAP005418-RA	0	0.082505	0.114034	OeCa M	Oe	Ca	1	1
Anogam_AGAP005420-RA	0	0.10668	0.114034	OeCa M	Oe	Ca	1	1
Anogam_AGAP005422-RA	0	0.10668	0.114034	OeCa M	Oe	Ca	1	1
Anogam_AGAP005424-RA	0	0.103689	0.114034	OeCa M	Oe	Ca	1	1
Anogam_AGAP013197-RA	0	0.101196	0.114034	OeCa M	Oe	Ca	1	1
Anogam_AGAP005425-RA	0	0.0932203	0.114034	OeCa M	Oe	Ca	1	1
Anogam_AGAP005428-RA	0	0.0987039	0.114034	OeCa M	Oe	Ca	1	1
Anogam_AGAP005430-RA	0	0.082505	0.114034	OeCa M	Oe	Ca	1	1
Anogam_AGAP005432-RA	0	0.082505	0.114034	OeCa M	Oe	Ca	1	1
Anogam_AGAP005434-RA	0	0.082505	0.114034	OeCa M	Oe	Ca	1	1
Anogam_AGAP028445-RA	0	0.082505	0.114034	OeCa M	Oe	Ca	1	1
Anogam_AGAP005437-RA	0	0.0867398	0.114034	OeCa M	Oe	Ca	1	1
Anogam_AGAP005440-RA	0	0.082505	0.114034	OeCa M	Oe	Ca	1	1
Anogam_AGAP005444-RA	0	0.0987039	0.114034	OeCa M	Oe	Ca	1	1
Anogam_AGAP005445-RA	0	0.106181	0.114034	OeCa M	Oe	Ca	1	1
Anogam_AGAP005448-RA	0	0.109172	0.114034	OeCa M	Oe	Ca	1	1
Anogam_AGAP005449-RA	0.406601	0.00598205	0.114034	OeCa M	Oe	Ca	0.516851	0.110249
Anogam_AGAP005449-RB	-0.406601	0.00498504	0.114034	OeCa M	Oe	Ca	0.483149	0.889751
Anogam_AGAP005450-RA	0	0.0957129	0.114034	OeCa M	Oe	Ca	1	1
Anogam_AGAP028446-RA	0	0.0957129	0.114034	OeCa M	Oe	Ca	1	1
Anogam_AGAP005453-RA	NA	NA	NA	OeCa M	Oe	Ca	NA	NA
Anogam_AGAP005457-RA	NA	NA	NA	OeCa M	Oe	Ca	NA	1
Anogam_AGAP005458-RA	NA	NA	NA	OeCa M	Oe	Ca	NA	1
Anogam_AGAP005461-RA	0	0.113161	0.114478	OeCa M	Oe	Ca	1	1
Anogam_AGAP005463-RA	0	0.082505	0.114034	OeCa M	Oe	Ca	1	1
Anogam_AGAP005466-RA	NA	NA	NA	OeCa M	Oe	Ca	NA	1
Anogam_AGAP005466-RB	NA	NA	NA	OeCa M	Oe	Ca	NA	0
Anogam_AGAP005469-RA	0	0.082505	0.114034	OeCa M	Oe	Ca	1	1
Anogam_AGAP005472-RA	0	0.082505	0.114034	OeCa M	Oe	Ca	1	1
Anogam_AGAP005474-RA	0	0.100698	0.114034	OeCa M	Oe	Ca	1	1
Anogam_AGAP005475-RA	0	0.0907278	0.114034	OeCa M	Oe	Ca	1	1
Anogam_AGAP005476-RA	0	0.110169	0.114034	OeCa M	Oe	Ca	1	1
Anogam_AGAP005477-RA	0	0.102692	0.114034	OeCa M	Oe	Ca	1	1
Anogam_AGAP005478-RA	0	0.0837488	0.114034	OeCa M	Oe	Ca	1	1
Anogam_AGAP005483-RA	0	0.082505	0.114034	OeCa M	Oe	Ca	1	1
Anogam_AGAP005484-RA	0	0.103689	0.114034	OeCa M	Oe	Ca	1	1
Anogam_AGAP005486-RA	0	0.0937188	0.114034	OeCa M	Oe	Ca	1	1
Anogam_AGAP005487-RA	0	0.082505	0.114034	OeCa M	Oe	Ca	1	1
Anogam_AGAP005490-RA	0	0.082505	0.114034	OeCa M	Oe	Ca	1	1
Anogam_AGAP005491-RA	0	0.082505	0.114034	OeCa M	Oe	Ca	1	1
Anogam_AGAP005492-RA	0	0.111167	0.114034	OeCa M	Oe	Ca	1	1
Anogam_AGAP005494-RA	0	0.0867398	0.114034	OeCa M	Oe	Ca	1	1
Anogam_AGAP005495-RA	0	0.113659	0.11468	OeCa M	Oe	Ca	1	1
Anogam_AGAP005497-RA	NA	NA	NA	OeCa M	Oe	Ca	1	NA
Anogam_AGAP005498-RB	0.0973364	0.0308151	0.114034	OeCa M	Oe	Ca	0.634983	0.537646
Anogam_AGAP005498-RC	-0.0735832	0.0393819	0.114034	OeCa M	Oe	Ca	0.264641	0.338224
Anogam_AGAP005498-RA	-0.0237532	0.054672	0.114034	OeCa M	Oe	Ca	0.100376	0.12413
Anogam_AGAP005499-RA	0	0.0932203	0.114034	OeCa M	Oe	Ca	1	1
Anogam_AGAP005504-RA	0.010994	0.0852443	0.114034	OeCa M	Oe	Ca	0.0356662	0.0246722
Anogam_AGAP005504-RB	-0.0543862	0.0483549	0.114034	OeCa M	Oe	Ca	0.452692	0.507078
Anogam_AGAP005504-RD	0.0326402	0.0648056	0.114034	OeCa M	Oe	Ca	0.340978	0.308337
Anogam_AGAP005504-RC	0.010752	0.0822532	0.114034	OeCa M	Oe	Ca	0.170664	0.159912
Anogam_AGAP005505-RA	0	0.104686	0.114034	OeCa M	Oe	Ca	1	1
Anogam_AGAP029078-RA	0	0.113659	0.11468	OeCa M	Oe	Ca	1	1
Anogam_AGAP005508-RA	-0.0117813	0.0717846	0.114034	OeCa M	Oe	Ca	0.491537	0.503318
Anogam_AGAP005508-RB	0	0.0902293	0.114034	OeCa M	Oe	Ca	0	0
Anogam_AGAP005508-RC	0.0117813	0.0636183	0.114034	OeCa M	Oe	Ca	0.508463	0.496682
Anogam_AGAP005510-RA	0	0.110668	0.114034	OeCa M	Oe	Ca	1	1
Anogam_AGAP005514-RA	0	0.082505	0.114034	OeCa M	Oe	Ca	1	1
Anogam_AGAP005515-RA	0	0.105683	0.114034	OeCa M	Oe	Ca	1	1
Anogam_AGAP005516-RA	0	0.110169	0.114034	OeCa M	Oe	Ca	1	1
Anogam_AGAP005520-RA	0	0.082505	0.114034	OeCa M	Oe	Ca	1	1
Anogam_AGAP005521-RA	0	0.0887338	0.114034	OeCa M	Oe	Ca	1	1
Anogam_AGAP013280-RA	0	0.082505	0.114034	OeCa M	Oe	Ca	1	1
Anogam_AGAP005524-RA	0.0459748	0.0498504	0.114034	OeCa M	Oe	Ca	0.172589	0.126614
Anogam_AGAP005524-RB	-0.0459748	0.0478564	0.114034	OeCa M	Oe	Ca	0.827411	0.873386
Anogam_AGAP005526-RA	0	0.104686	0.114034	OeCa M	Oe	Ca	1	1
Anogam_AGAP005527-RA	0	0.0922233	0.114034	OeCa M	Oe	Ca	1	1
Anogam_AGAP005530-RA	0	0.0907278	0.114034	OeCa M	Oe	Ca	1	1
Anogam_AGAP005531-RA	0	0.0962114	0.114034	OeCa M	Oe	Ca	1	1
Anogam_AGAP005533-RA	0	0.082505	0.114034	OeCa M	Oe	Ca	1	1
Anogam_AGAP005535-RA	0	0.0972084	0.114034	OeCa M	Oe	Ca	1	1
Anogam_AGAP005537-RA	0	0.0992024	0.114034	OeCa M	Oe	Ca	1	1
Anogam_AGAP005539-RA	0	0.094086	0.114034	OeCa M	Oe	Ca	1	1
Anogam_AGAP005540-RA	0	0.108175	0.114034	OeCa M	Oe	Ca	1	1
Anogam_AGAP005542-RA	0	0.0952144	0.114034	OeCa M	Oe	Ca	1	1
Anogam_AGAP005543-RA	0	0.101196	0.114034	OeCa M	Oe	Ca	1	1
Anogam_AGAP005544-RA	0	0.082505	0.114034	OeCa M	Oe	Ca	1	1
Anogam_AGAP005548-RA	0	0.082505	0.114034	OeCa M	Oe	Ca	1	1
Anogam_AGAP005550-RA	0	0.0997009	0.114034	OeCa M	Oe	Ca	1	1
Anogam_AGAP005553-RA	0	0.102193	0.114034	OeCa M	Oe	Ca	1	1
Anogam_AGAP005555-RA	0	0.0982054	0.114034	OeCa M	Oe	Ca	1	1
Anogam_AGAP005556-RB	-0.0302145	0.057328	0.114034	OeCa M	Oe	Ca	0.889166	0.919381
Anogam_AGAP005556-RA	0.0302145	0.0658026	0.114034	OeCa M	Oe	Ca	0.110834	0.0806194
Anogam_AGAP005560-RA	0	0.0892323	0.114034	OeCa M	Oe	Ca	1	1
Anogam_AGAP005562-RA	0	0.0967099	0.114034	OeCa M	Oe	Ca	1	1
Anogam_AGAP005564-RB	-0.0980278	0.0309073	0.114034	OeCa M	Oe	Ca	0.0490268	0.147055
Anogam_AGAP005564-RD	-0.19609	0.0149105	0.114034	OeCa M	Oe	Ca	0.0159768	0.212067
Anogam_AGAP005564-RA	0.434461	0.00397614	0.114034	OeCa M	Oe	Ca	0.700594	0.266133
Anogam_AGAP005564-RC	-0.140343	0.0248509	0.114034	OeCa M	Oe	Ca	0.234403	0.374745
Anogam_AGAP005565-RA	0	0.082505	0.114034	OeCa M	Oe	Ca	1	1
Anogam_AGAP005566-RA	0	0.0867398	0.114034	OeCa M	Oe	Ca	1	1
Anogam_AGAP005568-RA	0	0.082505	0.114034	OeCa M	Oe	Ca	1	1
Anogam_AGAP005570-RA	0	0.111167	0.114034	OeCa M	Oe	Ca	1	1
Anogam_AGAP005571-RA	0	0.102692	0.114034	OeCa M	Oe	Ca	1	1
Anogam_AGAP005572-RA	0	0.111167	0.114034	OeCa M	Oe	Ca	1	1
Anogam_AGAP005573-RA	0	0.102193	0.114034	OeCa M	Oe	Ca	1	1
Anogam_AGAP005574-RA	0	0.0892323	0.114034	OeCa M	Oe	Ca	1	1
Anogam_AGAP005575-RA	0	0.082505	0.114034	OeCa M	Oe	Ca	1	1
Anogam_AGAP005578-RA	0	0.0967099	0.114034	OeCa M	Oe	Ca	1	1
Anogam_AGAP005579-RA	0	0.0947159	0.114034	OeCa M	Oe	Ca	1	1
Anogam_AGAP005582-RA	0	0.109671	0.114034	OeCa M	Oe	Ca	1	1
Anogam_AGAP005584-RA	0	0.0982054	0.114034	OeCa M	Oe	Ca	1	1
Anogam_AGAP005586-RA	NA	NA	NA	OeCa M	Oe	Ca	1	NA
Anogam_AGAP005588-RA	NA	NA	NA	OeCa M	Oe	Ca	NA	NA
Anogam_AGAP005589-RA	NA	NA	NA	OeCa M	Oe	Ca	1	NA
Anogam_AGAP028756-RA	NA	NA	NA	OeCa M	Oe	Ca	NA	NA
Anogam_AGAP005591-RA	0	0.107677	0.114034	OeCa M	Oe	Ca	1	1
Anogam_AGAP005592-RA	0	0.104187	0.114034	OeCa M	Oe	Ca	1	1
Anogam_AGAP005593-RA	NA	NA	NA	OeCa M	Oe	Ca	NA	NA
Anogam_AGAP005596-RA	0	0.0967099	0.114034	OeCa M	Oe	Ca	1	1
Anogam_AGAP005597-RA	NA	NA	NA	OeCa M	Oe	Ca	NA	1
Anogam_AGAP005598-RA	NA	NA	NA	OeCa M	Oe	Ca	NA	NA
Anogam_AGAP005600-RA	0	0.0957129	0.114034	OeCa M	Oe	Ca	1	1
Anogam_AGAP005603-RA	0	0.082505	0.114034	OeCa M	Oe	Ca	1	1
Anogam_AGAP005605-RA	0	0.109172	0.114034	OeCa M	Oe	Ca	1	1
Anogam_AGAP005608-RA	0	0.10668	0.114034	OeCa M	Oe	Ca	1	1
Anogam_AGAP005614-RA	0	0.0942173	0.114034	OeCa M	Oe	Ca	1	1
Anogam_AGAP005616-RA	0	0.110169	0.114034	OeCa M	Oe	Ca	1	1
Anogam_AGAP005618-RA	0	0.0947159	0.114034	OeCa M	Oe	Ca	1	1
Anogam_AGAP005621-RA	0	0.082505	0.114034	OeCa M	Oe	Ca	1	1
Anogam_AGAP005623-RA	0	0.082505	0.114034	OeCa M	Oe	Ca	1	1
Anogam_AGAP005625-RA	-0.0122058	0.0822532	0.114034	OeCa M	Oe	Ca	0.97163	0.983835
Anogam_AGAP005625-RB	0.0122058	0.0822532	0.114034	OeCa M	Oe	Ca	0.0283704	0.0161646
Anogam_AGAP005630-RA	0	0.082505	0.114034	OeCa M	Oe	Ca	1	1
Anogam_AGAP005631-RA	0	0.109671	0.114034	OeCa M	Oe	Ca	1	1
Anogam_AGAP005634-RA	0	0.0872383	0.114034	OeCa M	Oe	Ca	1	1
Anogam_AGAP005635-RB	0.110669	0.0298211	0.114034	OeCa M	Oe	Ca	0.31586	0.205191
Anogam_AGAP005635-RA	-0.110669	0.0333998	0.114034	OeCa M	Oe	Ca	0.68414	0.794809
Anogam_AGAP005636-RA	0	0.102193	0.114034	OeCa M	Oe	Ca	1	1
Anogam_AGAP005639-RA	0	0.0972084	0.114034	OeCa M	Oe	Ca	1	1
Anogam_AGAP005641-RA	0	0.0967099	0.114034	OeCa M	Oe	Ca	1	1
Anogam_AGAP005644-RA	0	0.0997009	0.114034	OeCa M	Oe	Ca	1	1
Anogam_AGAP005645-RA	0	0.082505	0.114034	OeCa M	Oe	Ca	1	1
Anogam_AGAP005646-RA	0	0.0902293	0.114034	OeCa M	Oe	Ca	1	1
Anogam_AGAP005647-RA	0	0.103689	0.114034	OeCa M	Oe	Ca	1	1
Anogam_AGAP005650-RA	0	0.082505	0.114034	OeCa M	Oe	Ca	1	1
Anogam_AGAP005653-RA	0	0.108175	0.114034	OeCa M	Oe	Ca	1	1
Anogam_AGAP005656-RA	0	0.112164	0.114096	OeCa M	Oe	Ca	1	1
Anogam_AGAP005657-RA	0	0.102692	0.114034	OeCa M	Oe	Ca	1	1
Anogam_AGAP005661-RB	-0.0050395	0.0735586	0.114034	OeCa M	Oe	Ca	0	0.0050395
Anogam_AGAP005661-RA	0.0050395	0.0735586	0.114034	OeCa M	Oe	Ca	1	0.994961
Anogam_AGAP005662-RA	0	0.082505	0.114034	OeCa M	Oe	Ca	1	1
Anogam_AGAP005663-RA	NA	NA	NA	OeCa M	Oe	Ca	NA	NA
Anogam_AGAP005664-RA	NA	NA	NA	OeCa M	Oe	Ca	NA	NA
Anogam_AGAP005670-RA	NA	NA	NA	OeCa M	Oe	Ca	NA	NA
Anogam_AGAP005671-RA	NA	NA	NA	OeCa M	Oe	Ca	NA	1
Anogam_AGAP005672-RB	-0.0788796	0.0388833	0.114034	OeCa M	Oe	Ca	0.138016	0.216896
Anogam_AGAP005672-RA	0.0788796	0.0443669	0.114034	OeCa M	Oe	Ca	0.861984	0.783104
Anogam_AGAP005673-RA	0	0.0942173	0.114034	OeCa M	Oe	Ca	1	1
Anogam_AGAP005674-RA	0	0.0952144	0.114034	OeCa M	Oe	Ca	1	1
Anogam_AGAP005677-RA	0	0.0992024	0.114034	OeCa M	Oe	Ca	1	1
Anogam_AGAP005678-RA	0	0.111167	0.114034	OeCa M	Oe	Ca	1	1
Anogam_AGAP005679-RA	NA	NA	NA	OeCa M	Oe	Ca	NA	1
Anogam_AGAP005680-RA	0	0.082505	0.114034	OeCa M	Oe	Ca	1	1
Anogam_AGAP005681-RA	0	0.0922233	0.114034	OeCa M	Oe	Ca	1	1
Anogam_AGAP005683-RA	0	0.100199	0.114034	OeCa M	Oe	Ca	1	1
Anogam_AGAP005685-RA	0	0.102692	0.114034	OeCa M	Oe	Ca	1	1
Anogam_AGAP005686-RA	NA	NA	NA	OeCa M	Oe	Ca	NA	1
Anogam_AGAP005687-RA	0	0.0957129	0.114034	OeCa M	Oe	Ca	1	1
Anogam_AGAP005688-RA	NA	NA	NA	OeCa M	Oe	Ca	NA	NA
Anogam_AGAP005695-RA	NA	NA	NA	OeCa M	Oe	Ca	NA	1
Anogam_AGAP005696-RA	NA	NA	NA	OeCa M	Oe	Ca	NA	1
Anogam_AGAP005699-RA	0	0.104686	0.114034	OeCa M	Oe	Ca	1	1
Anogam_AGAP005701-RA	0	0.082505	0.114034	OeCa M	Oe	Ca	1	1
Anogam_AGAP005702-RA	0	0.082505	0.114034	OeCa M	Oe	Ca	1	1
Anogam_AGAP005703-RA	NA	NA	NA	OeCa M	Oe	Ca	NA	NA
Anogam_AGAP005705-RA	NA	NA	NA	OeCa M	Oe	Ca	NA	1
Anogam_AGAP005706-RA	0	0.082505	0.114034	OeCa M	Oe	Ca	1	1
Anogam_AGAP005707-RA	0	0.082505	0.114034	OeCa M	Oe	Ca	1	1
Anogam_AGAP005708-RA	0	0.108674	0.114034	OeCa M	Oe	Ca	1	1
Anogam_AGAP005709-RA	0	0.0952144	0.114034	OeCa M	Oe	Ca	1	1
Anogam_AGAP005712-RC	-0.163154	0.0189432	0.114034	OeCa M	Oe	Ca	0.661976	0.82513
Anogam_AGAP005712-RA	0.0846285	0.0358923	0.114034	OeCa M	Oe	Ca	0.243963	0.159334
Anogam_AGAP005712-RB	0.0785252	0.0398804	0.114034	OeCa M	Oe	Ca	0.0940616	0.0155364
Anogam_AGAP028448-RA	0	0.0917248	0.114034	OeCa M	Oe	Ca	1	1
Anogam_AGAP005714-RA	0	0.101196	0.114034	OeCa M	Oe	Ca	1	1
Anogam_AGAP005717-RA	0	0.100199	0.114034	OeCa M	Oe	Ca	1	1
Anogam_AGAP005721-RA	0	0.082505	0.114034	OeCa M	Oe	Ca	1	1
Anogam_AGAP005725-RA	0	0.082505	0.114034	OeCa M	Oe	Ca	1	1
Anogam_AGAP013675-RA	0	0.0882353	0.114034	OeCa M	Oe	Ca	1	1
Anogam_AGAP005728-RA	0	0.0972084	0.114034	OeCa M	Oe	Ca	1	1
Anogam_AGAP005729-RA	0	0.0817547	0.114034	OeCa M	Oe	Ca	1	1
Anogam_AGAP005731-RA	0	0.0982054	0.114034	OeCa M	Oe	Ca	1	1
Anogam_AGAP005731-RB	0	0.101695	0.114034	OeCa M	Oe	Ca	0	0
Anogam_AGAP005733-RA	NA	NA	NA	OeCa M	Oe	Ca	1	NA
Anogam_AGAP005734-RA	0	0.0967099	0.114034	OeCa M	Oe	Ca	1	1
Anogam_AGAP005738-RA	0	0.0997009	0.114034	OeCa M	Oe	Ca	1	1
Anogam_AGAP005742-RA	-0.0138918	0.0616302	0.114034	OeCa M	Oe	Ca	0.52537	0.539262
Anogam_AGAP005742-RB	0.0138918	0.0892323	0.114034	OeCa M	Oe	Ca	0.47463	0.460738
Anogam_AGAP005745-RA	0	0.0972084	0.114034	OeCa M	Oe	Ca	1	1
Anogam_AGAP005746-RA	0	0.101695	0.114034	OeCa M	Oe	Ca	1	1
Anogam_AGAP005749-RA	0	0.0987039	0.114034	OeCa M	Oe	Ca	1	1
Anogam_AGAP005750-RA	0	0.0997009	0.114034	OeCa M	Oe	Ca	1	1
Anogam_AGAP005751-RA	0	0.0942173	0.114034	OeCa M	Oe	Ca	1	1
Anogam_AGAP005752-RA	0	0.10319	0.114034	OeCa M	Oe	Ca	1	1
Anogam_AGAP005754-RA	0	0.0912263	0.114034	OeCa M	Oe	Ca	1	1
Anogam_AGAP005755-RA	-0.0839726	0.0337972	0.114034	OeCa M	Oe	Ca	0.863487	0.947459
Anogam_AGAP005755-RB	0.0839726	0.0428714	0.114034	OeCa M	Oe	Ca	0.136513	0.0525405
Anogam_AGAP005759-RA	0	0.082505	0.114034	OeCa M	Oe	Ca	1	1
Anogam_AGAP005760-RA	0	0.082505	0.114034	OeCa M	Oe	Ca	1	1
Anogam_AGAP005762-RB	0.0782431	0.0357853	0.114034	OeCa M	Oe	Ca	0.263479	0.185236
Anogam_AGAP005762-RA	-0.0782431	0.0357853	0.114034	OeCa M	Oe	Ca	0.736521	0.814764
Anogam_AGAP005764-RA	0	0.082505	0.114034	OeCa M	Oe	Ca	1	1
Anogam_AGAP005766-RA	0	0.0932203	0.114034	OeCa M	Oe	Ca	1	1
Anogam_AGAP005767-RA	0	0.082505	0.114034	OeCa M	Oe	Ca	1	1
Anogam_AGAP005768-RA	0	0.0902293	0.114034	OeCa M	Oe	Ca	1	1
Anogam_AGAP005769-RA	0	0.0892323	0.114034	OeCa M	Oe	Ca	1	1
Anogam_AGAP005771-RA	0	0.0962114	0.114034	OeCa M	Oe	Ca	1	1
Anogam_AGAP005773-RA	0.17724	0.0114656	0.114034	OeCa M	Oe	Ca	0.480423	0.303183
Anogam_AGAP005773-RB	-0.17724	0.0164506	0.114034	OeCa M	Oe	Ca	0.519577	0.696817
Anogam_AGAP005776-RA	0	0.101695	0.114034	OeCa M	Oe	Ca	1	1
Anogam_AGAP005778-RA	0	0.0922233	0.114034	OeCa M	Oe	Ca	1	1
Anogam_AGAP005782-RA	0	0.104686	0.114034	OeCa M	Oe	Ca	1	1
Anogam_AGAP005784-RA	0	0.0942173	0.114034	OeCa M	Oe	Ca	1	1
Anogam_AGAP005785-RA	0	0.0982054	0.114034	OeCa M	Oe	Ca	1	1
Anogam_AGAP005786-RA	0	0.0987039	0.114034	OeCa M	Oe	Ca	1	1
Anogam_AGAP005787-RA	0	0.082505	0.114034	OeCa M	Oe	Ca	1	1
Anogam_AGAP028396-RA	0	0.082505	0.114034	OeCa M	Oe	Ca	1	1
Anogam_AGAP005788-RA	0	0.0952144	0.114034	OeCa M	Oe	Ca	1	1
Anogam_AGAP005789-RA	0	0.105184	0.114034	OeCa M	Oe	Ca	1	1
Anogam_AGAP005790-RA	0	0.111665	0.114034	OeCa M	Oe	Ca	1	1
Anogam_AGAP005792-RA	0	0.0927218	0.114034	OeCa M	Oe	Ca	1	1
Anogam_AGAP005794-RA	0	0.0942173	0.114034	OeCa M	Oe	Ca	1	1
Anogam_AGAP005795-RA	0	0.104187	0.114034	OeCa M	Oe	Ca	1	1
Anogam_AGAP005796-RA	0	0.0977069	0.114034	OeCa M	Oe	Ca	1	1
Anogam_AGAP005797-RA	0	0.100199	0.114034	OeCa M	Oe	Ca	1	1
Anogam_AGAP005800-RA	0	0.082505	0.114034	OeCa M	Oe	Ca	1	1
Anogam_AGAP005802-RA	0	0.112662	0.114325	OeCa M	Oe	Ca	1	1
Anogam_AGAP005803-RA	0	0.0962114	0.114034	OeCa M	Oe	Ca	1	1
Anogam_AGAP028981-RA	NA	NA	NA	OeCa M	Oe	Ca	NA	NA
Anogam_AGAP005805-RA	0	0.0977069	0.114034	OeCa M	Oe	Ca	1	1
Anogam_AGAP005809-RA	0	0.0837488	0.114034	OeCa M	Oe	Ca	1	1
Anogam_AGAP005812-RA	0	0.114158	0.115015	OeCa M	Oe	Ca	1	1
Anogam_AGAP005815-RA	0	0.082505	0.114034	OeCa M	Oe	Ca	1	1
Anogam_AGAP005817-RA	0	0.0937188	0.114034	OeCa M	Oe	Ca	1	1
Anogam_AGAP005820-RA	0	0.102692	0.114034	OeCa M	Oe	Ca	1	1
Anogam_AGAP005821-RA	NA	NA	NA	OeCa M	Oe	Ca	1	NA
Anogam_AGAP005823-RA	0	0.082505	0.114034	OeCa M	Oe	Ca	1	1
Anogam_AGAP005825-RA	0	0.106181	0.114034	OeCa M	Oe	Ca	1	1
Anogam_AGAP005828-RA	0.0248326	0.0702891	0.114034	OeCa M	Oe	Ca	0.0466779	0.0218453
Anogam_AGAP005828-RB	-0.192177	0.0109671	0.114034	OeCa M	Oe	Ca	0.389602	0.581779
Anogam_AGAP005828-RC	0.167344	0.0124626	0.114034	OeCa M	Oe	Ca	0.56372	0.396375
Anogam_AGAP005830-RA	0	0.100199	0.114034	OeCa M	Oe	Ca	1	1
Anogam_AGAP005831-RA	0	0.0887338	0.114034	OeCa M	Oe	Ca	1	1
Anogam_AGAP005833-RA	0	0.0957129	0.114034	OeCa M	Oe	Ca	1	1
Anogam_AGAP005834-RA	0	0.114656	0.115265	OeCa M	Oe	Ca	1	1
Anogam_AGAP005835-RA	0	0.102193	0.114034	OeCa M	Oe	Ca	1	1
Anogam_AGAP005836-RA	0	0.082505	0.114034	OeCa M	Oe	Ca	1	1
Anogam_AGAP005837-RA	0	0.082505	0.114034	OeCa M	Oe	Ca	1	1
Anogam_AGAP005838-RA	0	0.082505	0.114034	OeCa M	Oe	Ca	1	1
Anogam_AGAP005839-RA	0	0.100199	0.114034	OeCa M	Oe	Ca	1	1
Anogam_AGAP005842-RA	0	0.108674	0.114034	OeCa M	Oe	Ca	1	1
Anogam_AGAP005845-RA	0	0.110668	0.114034	OeCa M	Oe	Ca	1	1
Anogam_AGAP005847-RA	0	0.0872383	0.114034	OeCa M	Oe	Ca	1	1
Anogam_AGAP005848-RA	0	0.0972084	0.114034	OeCa M	Oe	Ca	1	1
Anogam_AGAP005849-RA	0	0.0852443	0.114034	OeCa M	Oe	Ca	1	1
Anogam_AGAP005850-RA	0	0.0932203	0.114034	OeCa M	Oe	Ca	1	1
Anogam_AGAP005852-RA	0	0.082505	0.114034	OeCa M	Oe	Ca	1	1
Anogam_AGAP028450-RA	NA	NA	NA	OeCa M	Oe	Ca	NA	NA
Anogam_AGAP005856-RA	0	0.082505	0.114034	OeCa M	Oe	Ca	1	1
Anogam_AGAP005858-RA	0	0.082505	0.114034	OeCa M	Oe	Ca	1	1
Anogam_AGAP005859-RA	0	0.082505	0.114034	OeCa M	Oe	Ca	1	1
Anogam_AGAP005860-RA	0	0.0902293	0.114034	OeCa M	Oe	Ca	1	1
Anogam_AGAP005862-RA	0	0.082505	0.114034	OeCa M	Oe	Ca	1	1
Anogam_AGAP005863-RA	0	0.0982054	0.114034	OeCa M	Oe	Ca	1	1
Anogam_AGAP005866-RA	0	0.104686	0.114034	OeCa M	Oe	Ca	1	1
Anogam_AGAP005870-RA	-0.0336798	0.0712861	0.114034	OeCa M	Oe	Ca	0	0.0336798
Anogam_AGAP005870-RB	0.0336798	0.0687936	0.114034	OeCa M	Oe	Ca	1	0.96632
Anogam_AGAP005874-RA	0	0.104686	0.114034	OeCa M	Oe	Ca	1	1
Anogam_AGAP005878-RB	0.0853224	0.0358923	0.114034	OeCa M	Oe	Ca	0.952328	0.867006
Anogam_AGAP005878-RA	-0.0853224	0.0358923	0.114034	OeCa M	Oe	Ca	0.0476718	0.132994
Anogam_AGAP005881-RA	0	0.0987039	0.114034	OeCa M	Oe	Ca	1	1
Anogam_AGAP005882-RA	0	0.082505	0.114034	OeCa M	Oe	Ca	1	1
Anogam_AGAP005885-RA	0	0.0982054	0.114034	OeCa M	Oe	Ca	1	1
Anogam_AGAP005890-RA	0.000198553	0.0902293	0.114034	OeCa M	Oe	Ca	0.0458225	0.0456239
Anogam_AGAP005890-RB	-0.000198553	0.109172	0.114034	OeCa M	Oe	Ca	0.954178	0.954376
Anogam_AGAP028260-RA	NA	NA	NA	OeCa M	Oe	Ca	NA	1
Anogam_AGAP005892-RA	0	0.10668	0.114034	OeCa M	Oe	Ca	1	1
Anogam_AGAP005894-RA	0	0.082505	0.114034	OeCa M	Oe	Ca	1	1
Anogam_AGAP005896-RA	0	0.082505	0.114034	OeCa M	Oe	Ca	1	1
Anogam_AGAP005899-RA	0	0.102193	0.114034	OeCa M	Oe	Ca	1	1
Anogam_AGAP005903-RA	NA	NA	NA	OeCa M	Oe	Ca	NA	0.948194
Anogam_AGAP005903-RB	NA	NA	NA	OeCa M	Oe	Ca	NA	0.0518059
Anogam_AGAP005906-RA	0	0.0912263	0.114034	OeCa M	Oe	Ca	1	1
Anogam_AGAP005907-RA	0	0.115155	0.115648	OeCa M	Oe	Ca	1	1
Anogam_AGAP005909-RA	0	0.0852443	0.114034	OeCa M	Oe	Ca	1	1
Anogam_AGAP005911-RA	0	0.108175	0.114034	OeCa M	Oe	Ca	1	1
Anogam_AGAP005912-RA	0	0.0867398	0.114034	OeCa M	Oe	Ca	1	1
Anogam_AGAP005913-RA	0	0.103689	0.114034	OeCa M	Oe	Ca	1	1
Anogam_AGAP005915-RA	0	0.112164	0.114096	OeCa M	Oe	Ca	1	1
Anogam_AGAP005916-RA	0	0.0917248	0.114034	OeCa M	Oe	Ca	1	1
Anogam_AGAP005922-RA	0	0.100698	0.114034	OeCa M	Oe	Ca	1	1
Anogam_AGAP005924-RA	0	0.082505	0.114034	OeCa M	Oe	Ca	1	1
Anogam_AGAP005925-RA	0	0.082505	0.114034	OeCa M	Oe	Ca	1	1
Anogam_AGAP005926-RA	0	0.10668	0.114034	OeCa M	Oe	Ca	1	1
Anogam_AGAP005928-RA	-0.0493371	0.0427435	0.114034	OeCa M	Oe	Ca	0.567918	0.617255
Anogam_AGAP005928-RB	0.0493371	0.0473579	0.114034	OeCa M	Oe	Ca	0.432082	0.382745
Anogam_AGAP005929-RA	0	0.0927218	0.114034	OeCa M	Oe	Ca	1	1
Anogam_AGAP005930-RA	0	0.113659	0.11468	OeCa M	Oe	Ca	1	1
Anogam_AGAP005932-RA	0	0.107178	0.114034	OeCa M	Oe	Ca	1	1
Anogam_AGAP005933-RA	0	0.110169	0.114034	OeCa M	Oe	Ca	1	1
Anogam_AGAP005936-RA	0	0.0967099	0.114034	OeCa M	Oe	Ca	1	1
Anogam_AGAP005938-RA	0	0.109671	0.114034	OeCa M	Oe	Ca	1	1
Anogam_AGAP005939-RA	0	0.0907278	0.114034	OeCa M	Oe	Ca	1	1
Anogam_AGAP005941-RA	0	0.107178	0.114034	OeCa M	Oe	Ca	1	1
Anogam_AGAP005942-RA	-0.00469351	0.0735586	0.114034	OeCa M	Oe	Ca	0.995306	1
Anogam_AGAP005942-RB	0.00469351	0.0735586	0.114034	OeCa M	Oe	Ca	0.00469351	0
Anogam_AGAP005944-RA	0	0.082505	0.114034	OeCa M	Oe	Ca	1	1
Anogam_AGAP005945-RA	0.167222	0.0218688	0.114034	OeCa M	Oe	Ca	0.737785	0.570563
Anogam_AGAP005945-RB	-0.167222	0.0218688	0.114034	OeCa M	Oe	Ca	0.262215	0.429437
Anogam_AGAP005946-RA	0	0.110668	0.114034	OeCa M	Oe	Ca	1	1
Anogam_AGAP005949-RB	-0.519123	0.00548355	0.114034	OeCa M	Oe	Ca	0.412716	0.931839
Anogam_AGAP005949-RA	0.519123	0.00299103	0.114034	OeCa M	Oe	Ca	0.587284	0.0681607
Anogam_AGAP005951-RA	NA	NA	NA	OeCa M	Oe	Ca	NA	1
Anogam_AGAP005954-RA	0	0.082505	0.114034	OeCa M	Oe	Ca	1	1
Anogam_AGAP005956-RA	0	0.082505	0.114034	OeCa M	Oe	Ca	1	1
Anogam_AGAP005958-RA	0	0.0952144	0.114034	OeCa M	Oe	Ca	1	1
Anogam_AGAP005960-RA	0	0.101695	0.114034	OeCa M	Oe	Ca	1	1
Anogam_AGAP005962-RA	0	0.0902293	0.114034	OeCa M	Oe	Ca	1	1
Anogam_AGAP005963-RA	0	0.102692	0.114034	OeCa M	Oe	Ca	1	1
Anogam_AGAP005964-RB	0	0.082505	0.114034	OeCa M	Oe	Ca	0	0
Anogam_AGAP005964-RA	0	0.0942173	0.114034	OeCa M	Oe	Ca	1	1
Anogam_AGAP005966-RA	NA	NA	NA	OeCa M	Oe	Ca	NA	NA
Anogam_AGAP005968-RA	NA	NA	NA	OeCa M	Oe	Ca	NA	1
Anogam_AGAP005970-RA	0	0.0917248	0.114034	OeCa M	Oe	Ca	1	1
Anogam_AGAP005971-RA	0	0.100199	0.114034	OeCa M	Oe	Ca	1	1
Anogam_AGAP005973-RA	0	0.103689	0.114034	OeCa M	Oe	Ca	1	1
Anogam_AGAP005975-RA	0	0.10319	0.114034	OeCa M	Oe	Ca	1	1
Anogam_AGAP028397-RA	0	0.0927218	0.114034	OeCa M	Oe	Ca	1	1
Anogam_AGAP005978-RA	-0.199845	0.0149105	0.114034	OeCa M	Oe	Ca	0.241697	0.441541
Anogam_AGAP005978-RB	0.199845	0.0129611	0.114034	OeCa M	Oe	Ca	0.758303	0.558459
Anogam_AGAP005981-RA	0	0.115155	0.115648	OeCa M	Oe	Ca	1	1
Anogam_AGAP005983-RA	0	0.105184	0.114034	OeCa M	Oe	Ca	1	1
Anogam_AGAP005990-RA	0	0.100698	0.114034	OeCa M	Oe	Ca	1	1
Anogam_AGAP005992-RA	0	0.106181	0.114034	OeCa M	Oe	Ca	1	1
Anogam_AGAP005993-RA	0	0.0927218	0.114034	OeCa M	Oe	Ca	1	1
Anogam_AGAP005994-RA	0	0.100698	0.114034	OeCa M	Oe	Ca	1	1
Anogam_AGAP005995-RA	NA	NA	NA	OeCa M	Oe	Ca	NA	NA
Anogam_AGAP005996-RA	0	0.082505	0.114034	OeCa M	Oe	Ca	1	1
Anogam_AGAP005997-RA	NA	NA	NA	OeCa M	Oe	Ca	NA	NA
Anogam_AGAP005998-RA	NA	NA	NA	OeCa M	Oe	Ca	NA	1
Anogam_AGAP005999-RA	0	0.101695	0.114034	OeCa M	Oe	Ca	1	1
Anogam_AGAP006000-RA	NA	NA	NA	OeCa M	Oe	Ca	NA	1
Anogam_AGAP006001-RA	0	0.082505	0.114034	OeCa M	Oe	Ca	1	1
Anogam_AGAP006003-RA	0	0.0842473	0.114034	OeCa M	Oe	Ca	1	1
Anogam_AGAP006004-RA	0	0.0932203	0.114034	OeCa M	Oe	Ca	1	1
Anogam_AGAP006005-RA	NA	NA	NA	OeCa M	Oe	Ca	NA	1
Anogam_AGAP006006-RA	NA	NA	NA	OeCa M	Oe	Ca	NA	NA
Anogam_AGAP006009-RA	NA	NA	NA	OeCa M	Oe	Ca	NA	1
Anogam_AGAP006010-RA	NA	NA	NA	OeCa M	Oe	Ca	NA	NA
Anogam_AGAP006012-RA	NA	NA	NA	OeCa M	Oe	Ca	NA	NA
Anogam_AGAP006015-RA	0	0.0937188	0.114034	OeCa M	Oe	Ca	1	1
Anogam_AGAP006016-RA	0	0.082505	0.114034	OeCa M	Oe	Ca	1	1
Anogam_AGAP006017-RA	0	0.082505	0.114034	OeCa M	Oe	Ca	1	1
Anogam_AGAP006018-RB	-0.191989	0.0154536	0.114034	OeCa M	Oe	Ca	0.175923	0.367912
Anogam_AGAP006018-RA	0.191989	0.0149105	0.114034	OeCa M	Oe	Ca	0.824077	0.632088
Anogam_AGAP006020-RA	0	0.082505	0.114034	OeCa M	Oe	Ca	1	1
Anogam_AGAP006022-RA	0	0.0852443	0.114034	OeCa M	Oe	Ca	1	1
Anogam_AGAP006023-RA	-0.109933	0.0363908	0.114034	OeCa M	Oe	Ca	0.890067	1
Anogam_AGAP006023-RB	0.109933	0.0314058	0.114034	OeCa M	Oe	Ca	0.109933	0
Anogam_AGAP006024-RA	0	0.107178	0.114034	OeCa M	Oe	Ca	1	1
Anogam_AGAP006025-RA	0	0.0957129	0.114034	OeCa M	Oe	Ca	1	1
Anogam_AGAP006026-RA	0	0.115653	0.115972	OeCa M	Oe	Ca	1	1
Anogam_AGAP006030-RA	0	0.082505	0.114034	OeCa M	Oe	Ca	1	1
Anogam_AGAP006032-RA	0	0.082505	0.114034	OeCa M	Oe	Ca	1	1
Anogam_AGAP006033-RA	0	0.082505	0.114034	OeCa M	Oe	Ca	1	1
Anogam_AGAP006034-RA	0	0.082505	0.114034	OeCa M	Oe	Ca	1	1
Anogam_AGAP006039-RA	0	0.0942173	0.114034	OeCa M	Oe	Ca	1	1
Anogam_AGAP006040-RA	0	0.082505	0.114034	OeCa M	Oe	Ca	1	1
Anogam_AGAP006042-RA	0.164371	0.0119641	0.114034	OeCa M	Oe	Ca	0.377902	0.213531
Anogam_AGAP006042-RB	-0.164371	0.0218688	0.114034	OeCa M	Oe	Ca	0.622098	0.786469
Anogam_AGAP029130-RA	0	0.105184	0.114034	OeCa M	Oe	Ca	1	1
Anogam_AGAP029102-RA	0	0.0967099	0.114034	OeCa M	Oe	Ca	1	1
Anogam_AGAP006045-RA	0	0.082505	0.114034	OeCa M	Oe	Ca	1	1
Anogam_AGAP006047-RA	0	0.0947159	0.114034	OeCa M	Oe	Ca	1	1
Anogam_AGAP006048-RA	0	0.107178	0.114034	OeCa M	Oe	Ca	1	1
Anogam_AGAP006049-RA	0	0.0932203	0.114034	OeCa M	Oe	Ca	1	1
Anogam_AGAP006050-RA	0	0.104187	0.114034	OeCa M	Oe	Ca	1	1
Anogam_AGAP029185-RA	0	0.101695	0.114034	OeCa M	Oe	Ca	1	1
Anogam_AGAP006055-RA	0	0.0877368	0.114034	OeCa M	Oe	Ca	1	1
Anogam_AGAP006057-RA	0	0.0992024	0.114034	OeCa M	Oe	Ca	1	1
Anogam_AGAP006058-RA	0	0.104686	0.114034	OeCa M	Oe	Ca	1	1
Anogam_AGAP006059-RA	0	0.0987039	0.114034	OeCa M	Oe	Ca	1	1
Anogam_AGAP006060-RA	NA	NA	NA	OeCa M	Oe	Ca	NA	1
Anogam_AGAP006062-RA	0	0.082505	0.114034	OeCa M	Oe	Ca	1	1
Anogam_AGAP006064-RA	0	0.102692	0.114034	OeCa M	Oe	Ca	1	1
Anogam_AGAP006068-RB	0.183966	0.0159046	0.114034	OeCa M	Oe	Ca	0.399474	0.215509
Anogam_AGAP006068-RC	-0.161523	0.0218688	0.114034	OeCa M	Oe	Ca	0.328068	0.48959
Anogam_AGAP006068-RA	-0.0224428	0.055666	0.114034	OeCa M	Oe	Ca	0.272458	0.294901
Anogam_AGAP006069-RA	0	0.0927218	0.114034	OeCa M	Oe	Ca	1	1
Anogam_AGAP006072-RA	0	0.110169	0.114034	OeCa M	Oe	Ca	1	1
Anogam_AGAP006074-RA	0	0.111167	0.114034	OeCa M	Oe	Ca	1	1
Anogam_AGAP006082-RA	0	0.113659	0.11468	OeCa M	Oe	Ca	1	1
Anogam_AGAP006083-RA	0.0930323	0.0299103	0.114034	OeCa M	Oe	Ca	0.0930323	0
Anogam_AGAP006083-RB	-0.0930323	0.0319043	0.114034	OeCa M	Oe	Ca	0.906968	1
Anogam_AGAP006085-RA	0	0.106181	0.114034	OeCa M	Oe	Ca	1	1
Anogam_AGAP006087-RA	0	0.0967099	0.114034	OeCa M	Oe	Ca	1	1
Anogam_AGAP006088-RA	0	0.102193	0.114034	OeCa M	Oe	Ca	1	1
Anogam_AGAP006090-RA	0	0.102692	0.114034	OeCa M	Oe	Ca	1	1
Anogam_AGAP006092-RA	0	0.0952144	0.114034	OeCa M	Oe	Ca	1	1
Anogam_AGAP006093-RA	0	0.082505	0.114034	OeCa M	Oe	Ca	1	1
Anogam_AGAP006095-RA	0	0.0997009	0.114034	OeCa M	Oe	Ca	1	1
Anogam_AGAP006096-RA	0	0.082505	0.114034	OeCa M	Oe	Ca	1	1
Anogam_AGAP006097-RA	0.0257386	0.0526839	0.114034	OeCa M	Oe	Ca	0.887674	0.861935
Anogam_AGAP006097-RB	-0.0257386	0.0526839	0.114034	OeCa M	Oe	Ca	0.112326	0.138065
Anogam_AGAP006100-RA	0	0.082505	0.114034	OeCa M	Oe	Ca	1	1
Anogam_AGAP006105-RA	0	0.0942173	0.114034	OeCa M	Oe	Ca	1	1
Anogam_AGAP006109-RA	0	0.0952144	0.114034	OeCa M	Oe	Ca	1	1
Anogam_AGAP028452-RA	0	0.107178	0.114034	OeCa M	Oe	Ca	1	1
Anogam_AGAP006118-RA	0	0.115155	0.115648	OeCa M	Oe	Ca	1	1
Anogam_AGAP006119-RA	0	0.0947159	0.114034	OeCa M	Oe	Ca	1	1
Anogam_AGAP006120-RA	0	0.0952144	0.114034	OeCa M	Oe	Ca	1	1
Anogam_AGAP006121-RA	0	0.108674	0.114034	OeCa M	Oe	Ca	1	1
Anogam_AGAP006127-RA	0	0.0942173	0.114034	OeCa M	Oe	Ca	1	1
Anogam_AGAP006129-RA	0	0.0937188	0.114034	OeCa M	Oe	Ca	1	1
Anogam_AGAP006130-RA	0	0.0947159	0.114034	OeCa M	Oe	Ca	1	1
Anogam_AGAP006132-RA	0	0.0917248	0.114034	OeCa M	Oe	Ca	1	1
Anogam_AGAP006133-RA	-0.108945	0.0284148	0.114034	OeCa M	Oe	Ca	0.52717	0.636115
Anogam_AGAP006133-RB	0.108945	0.0298211	0.114034	OeCa M	Oe	Ca	0.47283	0.363885
Anogam_AGAP006134-RA	0	0.082505	0.114034	OeCa M	Oe	Ca	1	1
Anogam_AGAP006136-RA	0	0.0902293	0.114034	OeCa M	Oe	Ca	1	1
Anogam_AGAP006141-RB	0.0233156	0.0717846	0.114034	OeCa M	Oe	Ca	0.311424	0.288109
Anogam_AGAP006141-RA	-0.0233156	0.0722832	0.114034	OeCa M	Oe	Ca	0.688576	0.711891
Anogam_AGAP006143-RE	-0.232222	0.0169492	0.114034	OeCa M	Oe	Ca	0.145865	0.378087
Anogam_AGAP006143-RC	0.307586	0.00695825	0.114034	OeCa M	Oe	Ca	0.520802	0.213216
Anogam_AGAP006143-RA	0.0158925	0.0762712	0.114034	OeCa M	Oe	Ca	0.0807926	0.0649001
Anogam_AGAP006143-RB	0.152637	0.0154536	0.114034	OeCa M	Oe	Ca	0.167527	0.0148898
Anogam_AGAP006143-RD	-0.0535802	0.052343	0.114034	OeCa M	Oe	Ca	0.0850138	0.138594
Anogam_AGAP006143-RF	-0.190314	0.0149105	0.114034	OeCa M	Oe	Ca	0	0.190314
Anogam_AGAP006145-RA	0	0.0967099	0.114034	OeCa M	Oe	Ca	1	1
Anogam_AGAP006147-RA	NA	NA	NA	OeCa M	Oe	Ca	NA	1
Anogam_AGAP006148-RA	NA	NA	NA	OeCa M	Oe	Ca	NA	NA
Anogam_AGAP006149-RA	0	0.100698	0.114034	OeCa M	Oe	Ca	1	1
Anogam_AGAP006150-RA	NA	NA	NA	OeCa M	Oe	Ca	NA	NA
Anogam_AGAP006157-RA	0	0.0902293	0.114034	OeCa M	Oe	Ca	1	1
Anogam_AGAP006158-RA	0	0.0997009	0.114034	OeCa M	Oe	Ca	1	1
Anogam_AGAP006159-RA	0	0.108175	0.114034	OeCa M	Oe	Ca	1	1
Anogam_AGAP006162-RA	0	0.082505	0.114034	OeCa M	Oe	Ca	1	1
Anogam_AGAP006164-RA	0	0.082505	0.114034	OeCa M	Oe	Ca	1	1
Anogam_AGAP006166-RA	0	0.082505	0.114034	OeCa M	Oe	Ca	1	1
Anogam_AGAP006169-RA	0	0.082505	0.114034	OeCa M	Oe	Ca	1	1
Anogam_AGAP006173-RA	0	0.0899015	0.114034	OeCa M	Oe	Ca	1	1
Anogam_AGAP006175-RA	0	0.082505	0.114034	OeCa M	Oe	Ca	1	1
Anogam_AGAP006176-RA	-0.288367	0.00795229	0.114034	OeCa M	Oe	Ca	0.623527	0.911894
Anogam_AGAP006176-RB	0.288367	0.0104686	0.114034	OeCa M	Oe	Ca	0.376473	0.0881064
Anogam_AGAP006177-RA	0	0.106181	0.114034	OeCa M	Oe	Ca	1	1
Anogam_AGAP006178-RB	0	0.0997009	0.114034	OeCa M	Oe	Ca	0	0
Anogam_AGAP006178-RC	0	0.0952144	0.114034	OeCa M	Oe	Ca	0	0
Anogam_AGAP006178-RA	0	0.0972084	0.114034	OeCa M	Oe	Ca	1	1
Anogam_AGAP006179-RA	-0.0235033	0.0518445	0.114034	OeCa M	Oe	Ca	0	0.0235033
Anogam_AGAP006179-RC	0.249656	0.0119641	0.114034	OeCa M	Oe	Ca	0.666667	0.417011
Anogam_AGAP006179-RB	-0.226153	0.0114656	0.114034	OeCa M	Oe	Ca	0.333333	0.559486
Anogam_AGAP006180-RA	0	0.0867398	0.114034	OeCa M	Oe	Ca	1	1
Anogam_AGAP006183-RA	0	0.106181	0.114034	OeCa M	Oe	Ca	1	1
Anogam_AGAP006185-RA	0	0.111665	0.114034	OeCa M	Oe	Ca	1	1
Anogam_AGAP006188-RB	0.192284	0.0179462	0.114034	OeCa M	Oe	Ca	0.880099	0.687815
Anogam_AGAP006188-RA	-0.192284	0.0159521	0.114034	OeCa M	Oe	Ca	0.119901	0.312185
Anogam_AGAP006190-RA	0	0.0997009	0.114034	OeCa M	Oe	Ca	1	1
Anogam_AGAP006192-RA	0	0.0982054	0.114034	OeCa M	Oe	Ca	1	1
Anogam_AGAP006193-RA	0	0.101196	0.114034	OeCa M	Oe	Ca	1	1
Anogam_AGAP006194-RA	0	0.082505	0.114034	OeCa M	Oe	Ca	1	1
Anogam_AGAP006195-RA	0	0.082505	0.114034	OeCa M	Oe	Ca	1	1
Anogam_AGAP006196-RA	0	0.0937188	0.114034	OeCa M	Oe	Ca	1	1
Anogam_AGAP006197-RA	0	0.0987039	0.114034	OeCa M	Oe	Ca	1	1
Anogam_AGAP006198-RA	NA	NA	NA	OeCa M	Oe	Ca	NA	NA
Anogam_AGAP006199-RA	0	0.112662	0.114325	OeCa M	Oe	Ca	1	1
Anogam_AGAP006200-RA	NA	NA	NA	OeCa M	Oe	Ca	NA	NA
Anogam_AGAP006201-RA	NA	NA	NA	OeCa M	Oe	Ca	NA	NA
Anogam_AGAP006202-RA	0	0.0997009	0.114034	OeCa M	Oe	Ca	1	1
Anogam_AGAP006203-RA	0	0.104686	0.114034	OeCa M	Oe	Ca	1	1
Anogam_AGAP006204-RA	0	0.0987039	0.114034	OeCa M	Oe	Ca	1	1
Anogam_AGAP006206-RA	-0.00184772	0.0987039	0.114034	OeCa M	Oe	Ca	0.0770508	0.0788985
Anogam_AGAP006206-RB	0.00184772	0.0745527	0.114034	OeCa M	Oe	Ca	0.922949	0.921102
Anogam_AGAP006210-RA	0	0.110169	0.114034	OeCa M	Oe	Ca	1	1
Anogam_AGAP006211-RA	0	0.0997009	0.114034	OeCa M	Oe	Ca	1	1
Anogam_AGAP006212-RA	0	0.101695	0.114034	OeCa M	Oe	Ca	1	1
Anogam_AGAP006213-RA	0	0.103689	0.114034	OeCa M	Oe	Ca	1	1
Anogam_AGAP028453-RA	0	0.0962114	0.114034	OeCa M	Oe	Ca	1	1
Anogam_AGAP006214-RA	0	0.082505	0.114034	OeCa M	Oe	Ca	1	1
Anogam_AGAP006215-RA	0	0.082505	0.114034	OeCa M	Oe	Ca	1	1
Anogam_AGAP006216-RA	0.079466	0.0347913	0.114034	OeCa M	Oe	Ca	0.911372	0.831906
Anogam_AGAP006216-RB	-0.079466	0.0347913	0.114034	OeCa M	Oe	Ca	0.0886281	0.168094
Anogam_AGAP006217-RA	0	0.082505	0.114034	OeCa M	Oe	Ca	1	1
Anogam_AGAP006218-RA	0	0.082505	0.114034	OeCa M	Oe	Ca	1	1
Anogam_AGAP006227-RA	0	0.082505	0.114034	OeCa M	Oe	Ca	1	1
Anogam_AGAP006232-RA	0	0.082505	0.114034	OeCa M	Oe	Ca	1	1
Anogam_AGAP006235-RA	0	0.10668	0.114034	OeCa M	Oe	Ca	1	1
Anogam_AGAP006236-RA	0	0.112164	0.114096	OeCa M	Oe	Ca	1	1
Anogam_AGAP006237-RA	0	0.0997009	0.114034	OeCa M	Oe	Ca	1	1
Anogam_AGAP006240-RA	0	0.0987039	0.114034	OeCa M	Oe	Ca	1	1
Anogam_AGAP006243-RA	0	0.0877368	0.114034	OeCa M	Oe	Ca	1	1
Anogam_AGAP029069-RA	0	0.0957129	0.114034	OeCa M	Oe	Ca	1	1
Anogam_AGAP006245-RA	0	0.0952144	0.114034	OeCa M	Oe	Ca	1	1
Anogam_AGAP006246-RA	0	0.082505	0.114034	OeCa M	Oe	Ca	1	1
Anogam_AGAP006249-RA	0	0.082505	0.114034	OeCa M	Oe	Ca	1	1
Anogam_AGAP006251-RA	0	0.0982054	0.114034	OeCa M	Oe	Ca	1	1
Anogam_AGAP006254-RA	0.0754234	0.0458624	0.114034	OeCa M	Oe	Ca	0.394599	0.319176
Anogam_AGAP006254-RC	-0.0607977	0.0453639	0.114034	OeCa M	Oe	Ca	0.272249	0.333047
Anogam_AGAP006254-RB	-0.0146257	0.0596421	0.114034	OeCa M	Oe	Ca	0.333152	0.347778
Anogam_AGAP006256-RA	0	0.107178	0.114034	OeCa M	Oe	Ca	1	1
Anogam_AGAP028399-RA	0	0.108674	0.114034	OeCa M	Oe	Ca	1	1
Anogam_AGAP006257-RA	0	0.0972084	0.114034	OeCa M	Oe	Ca	1	1
Anogam_AGAP006258-RA	0	0.082505	0.114034	OeCa M	Oe	Ca	1	1
Anogam_AGAP006259-RA	0	0.0967099	0.114034	OeCa M	Oe	Ca	1	1
Anogam_AGAP006260-RD	0.0639035	0.0458624	0.114034	OeCa M	Oe	Ca	0.785768	0.721864
Anogam_AGAP006260-RA	0.131641	0.0304088	0.114034	OeCa M	Oe	Ca	0.149445	0.0178038
Anogam_AGAP006260-RB	-0.0883417	0.0329013	0.114034	OeCa M	Oe	Ca	0.0647871	0.153129
Anogam_AGAP006260-RC	-0.107203	0.0314058	0.114034	OeCa M	Oe	Ca	0	0.107203
Anogam_AGAP006261-RA	NA	NA	NA	OeCa M	Oe	Ca	NA	NA
Anogam_AGAP006262-RA	NA	NA	NA	OeCa M	Oe	Ca	NA	1
Anogam_AGAP006263-RA	0	0.0992024	0.114034	OeCa M	Oe	Ca	1	1
Anogam_AGAP006265-RA	0	0.108175	0.114034	OeCa M	Oe	Ca	1	1
Anogam_AGAP006267-RA	0	0.104686	0.114034	OeCa M	Oe	Ca	1	1
Anogam_AGAP006268-RA	0	0.102193	0.114034	OeCa M	Oe	Ca	1	1
Anogam_AGAP006269-RA	0	0.112662	0.114325	OeCa M	Oe	Ca	1	1
Anogam_AGAP006270-RA	0	0.0967099	0.114034	OeCa M	Oe	Ca	1	1
Anogam_AGAP006271-RA	0	0.082505	0.114034	OeCa M	Oe	Ca	1	1
Anogam_AGAP006273-RA	0	0.0982054	0.114034	OeCa M	Oe	Ca	1	1
Anogam_AGAP029191-RA	0	0.100698	0.114034	OeCa M	Oe	Ca	1	1
Anogam_AGAP006280-RA	0	0.0857428	0.114034	OeCa M	Oe	Ca	1	1
Anogam_AGAP013248-RA	NA	NA	NA	OeCa M	Oe	Ca	NA	1
Anogam_AGAP006283-RB	NA	NA	NA	OeCa M	Oe	Ca	NA	1
Anogam_AGAP006284-RA	NA	NA	NA	OeCa M	Oe	Ca	NA	NA
Anogam_AGAP006285-RA	NA	NA	NA	OeCa M	Oe	Ca	NA	NA
Anogam_AGAP006286-RA	NA	NA	NA	OeCa M	Oe	Ca	NA	NA
Anogam_AGAP006288-RA	NA	NA	NA	OeCa M	Oe	Ca	NA	NA
Anogam_AGAP006290-RA	NA	NA	NA	OeCa M	Oe	Ca	NA	NA
Anogam_AGAP006297-RA	NA	NA	NA	OeCa M	Oe	Ca	NA	NA
Anogam_AGAP006299-RA	NA	NA	NA	OeCa M	Oe	Ca	NA	NA
Anogam_AGAP006301-RA	NA	NA	NA	OeCa M	Oe	Ca	NA	NA
Anogam_AGAP006317-RA	NA	NA	NA	OeCa M	Oe	Ca	NA	NA
Anogam_AGAP006321-RA	0	0.101196	0.114034	OeCa M	Oe	Ca	1	1
Anogam_AGAP006324-RA	0	0.0957129	0.114034	OeCa M	Oe	Ca	1	1
Anogam_AGAP006325-RA	0	0.082505	0.114034	OeCa M	Oe	Ca	1	1
Anogam_AGAP006339-RA	0	0.103689	0.114034	OeCa M	Oe	Ca	1	1
Anogam_AGAP006342-RA	0	0.0932203	0.114034	OeCa M	Oe	Ca	1	1
Anogam_AGAP006344-RA	0	0.111167	0.114034	OeCa M	Oe	Ca	1	1
Anogam_AGAP006346-RA	0.0034072	0.0745527	0.114034	OeCa M	Oe	Ca	0.0407472	0.03734
Anogam_AGAP006346-RB	0.130067	0.026839	0.114034	OeCa M	Oe	Ca	0.406785	0.276718
Anogam_AGAP006346-RC	-0.133474	0.0189432	0.114034	OeCa M	Oe	Ca	0.552468	0.685942
Anogam_AGAP006347-RA	0.198138	0.0174477	0.114034	OeCa M	Oe	Ca	0.952381	0.754242
Anogam_AGAP006347-RB	-0.198138	0.0149551	0.114034	OeCa M	Oe	Ca	0.047619	0.245758
Anogam_AGAP006348-RA	0	0.104686	0.114034	OeCa M	Oe	Ca	1	1
Anogam_AGAP006354-RA	0	0.110169	0.114034	OeCa M	Oe	Ca	1	1
Anogam_AGAP006357-RA	0	0.082505	0.114034	OeCa M	Oe	Ca	1	1
Anogam_AGAP006359-RA	0	0.100698	0.114034	OeCa M	Oe	Ca	1	1
Anogam_AGAP006366-RB	0.0190784	0.0586481	0.114034	OeCa M	Oe	Ca	0.0403314	0.0212529
Anogam_AGAP006366-RC	0.0437764	0.0457256	0.114034	OeCa M	Oe	Ca	0.616043	0.572266
Anogam_AGAP006366-RD	-0.0331488	0.059322	0.114034	OeCa M	Oe	Ca	0.122604	0.155753
Anogam_AGAP006366-RA	-0.0278333	0.0692921	0.114034	OeCa M	Oe	Ca	0.221021	0.248855
Anogam_AGAP006366-RE	-0.00187266	0.0937188	0.114034	OeCa M	Oe	Ca	0	0.00187266
Anogam_AGAP006367-RA	0	0.0987039	0.114034	OeCa M	Oe	Ca	1	1
Anogam_AGAP006371-RA	NA	NA	NA	OeCa M	Oe	Ca	NA	1
Anogam_AGAP006373-RA	0	0.0942173	0.114034	OeCa M	Oe	Ca	1	1
Anogam_AGAP006379-RA	0	0.082505	0.114034	OeCa M	Oe	Ca	1	1
Anogam_AGAP006380-RA	0	0.100199	0.114034	OeCa M	Oe	Ca	1	1
Anogam_AGAP006383-RA	0	0.0997009	0.114034	OeCa M	Oe	Ca	1	1
Anogam_AGAP006385-RA	0	0.102692	0.114034	OeCa M	Oe	Ca	1	1
Anogam_AGAP006387-RA	0	0.0962114	0.114034	OeCa M	Oe	Ca	1	1
Anogam_AGAP006389-RA	0	0.105184	0.114034	OeCa M	Oe	Ca	1	1
Anogam_AGAP006392-RA	0	0.102692	0.114034	OeCa M	Oe	Ca	1	1
Anogam_AGAP006394-RA	0	0.111167	0.114034	OeCa M	Oe	Ca	1	1
Anogam_AGAP006395-RA	0	0.0937188	0.114034	OeCa M	Oe	Ca	1	1
Anogam_AGAP006396-RA	0	0.107178	0.114034	OeCa M	Oe	Ca	1	1
Anogam_AGAP006399-RA	0	0.105184	0.114034	OeCa M	Oe	Ca	1	1
Anogam_AGAP006402-RA	0	0.082505	0.114034	OeCa M	Oe	Ca	1	1
Anogam_AGAP006404-RA	0	0.082505	0.114034	OeCa M	Oe	Ca	1	1
Anogam_AGAP006405-RA	0	0.082505	0.114034	OeCa M	Oe	Ca	1	1
Anogam_AGAP006406-RA	0	0.0967099	0.114034	OeCa M	Oe	Ca	1	1
Anogam_AGAP006408-RA	0	0.082505	0.114034	OeCa M	Oe	Ca	1	1
Anogam_AGAP006413-RA	0	0.082505	0.114034	OeCa M	Oe	Ca	1	1
Anogam_AGAP006414-RA	0	0.0852443	0.114034	OeCa M	Oe	Ca	1	1
Anogam_AGAP006415-RA	0	0.0907278	0.114034	OeCa M	Oe	Ca	1	1
Anogam_AGAP006417-RA	0	0.102193	0.114034	OeCa M	Oe	Ca	1	1
Anogam_AGAP006422-RA	0	0.0987039	0.114034	OeCa M	Oe	Ca	1	1
Anogam_AGAP006423-RA	0	0.0907278	0.114034	OeCa M	Oe	Ca	1	1
Anogam_AGAP006424-RA	0	0.0967099	0.114034	OeCa M	Oe	Ca	1	1
Anogam_AGAP006425-RA	0	0.082505	0.114034	OeCa M	Oe	Ca	1	1
Anogam_AGAP006426-RA	0	0.0982054	0.114034	OeCa M	Oe	Ca	1	1
Anogam_AGAP006427-RA	0	0.082505	0.114034	OeCa M	Oe	Ca	1	1
Anogam_AGAP006427-RB	0	0.082505	0.114034	OeCa M	Oe	Ca	0	0
Anogam_AGAP006428-RA	0	0.0947159	0.114034	OeCa M	Oe	Ca	1	1
Anogam_AGAP006431-RA	0	0.082505	0.114034	OeCa M	Oe	Ca	1	1
Anogam_AGAP006433-RA	0	0.0967099	0.114034	OeCa M	Oe	Ca	1	1
Anogam_AGAP006435-RA	NA	NA	NA	OeCa M	Oe	Ca	NA	1
Anogam_AGAP028457-RA	0	0.102193	0.114034	OeCa M	Oe	Ca	1	1
Anogam_AGAP006438-RA	0	0.082505	0.114034	OeCa M	Oe	Ca	1	1
Anogam_AGAP006439-RA	0	0.082505	0.114034	OeCa M	Oe	Ca	1	1
Anogam_AGAP029172-RA	NA	NA	NA	OeCa M	Oe	Ca	NA	1
Anogam_AGAP006440-RA	NA	NA	NA	OeCa M	Oe	Ca	NA	1
Anogam_AGAP029154-RA	NA	NA	NA	OeCa M	Oe	Ca	NA	1
Anogam_AGAP006441-RA	0.177465	0.0139581	0.114034	OeCa M	Oe	Ca	0.480731	0.303265
Anogam_AGAP006441-RB	-0.177465	0.0164506	0.114034	OeCa M	Oe	Ca	0.519269	0.696735
Anogam_AGAP006443-RA	0	0.104686	0.114034	OeCa M	Oe	Ca	1	1
Anogam_AGAP006445-RA	0	0.082505	0.114034	OeCa M	Oe	Ca	1	1
Anogam_AGAP006448-RB	-0.024141	0.0667996	0.114034	OeCa M	Oe	Ca	0.0259998	0.0501409
Anogam_AGAP006448-RC	0.0287034	0.0526839	0.114034	OeCa M	Oe	Ca	0.0397467	0.0110433
Anogam_AGAP006448-RD	0.0116294	0.0636183	0.114034	OeCa M	Oe	Ca	0.0281383	0.0165089
Anogam_AGAP006448-RA	-0.0161918	0.0596421	0.114034	OeCa M	Oe	Ca	0.906115	0.922307
Anogam_AGAP006449-RA	0	0.082505	0.114034	OeCa M	Oe	Ca	1	1
Anogam_AGAP006450-RA	0	0.082505	0.114034	OeCa M	Oe	Ca	1	1
Anogam_AGAP006451-RA	0	0.082505	0.114034	OeCa M	Oe	Ca	1	1
Anogam_AGAP006453-RA	0	0.082505	0.114034	OeCa M	Oe	Ca	1	1
Anogam_AGAP006454-RA	0	0.104686	0.114034	OeCa M	Oe	Ca	1	1
Anogam_AGAP006457-RA	0	0.108175	0.114034	OeCa M	Oe	Ca	1	1
Anogam_AGAP006458-RA	0	0.082505	0.114034	OeCa M	Oe	Ca	1	1
Anogam_AGAP006468-RA	0	0.0947159	0.114034	OeCa M	Oe	Ca	1	1
Anogam_AGAP006470-RA	0	0.101695	0.114034	OeCa M	Oe	Ca	1	1
Anogam_AGAP013092-RA	0	0.0947159	0.114034	OeCa M	Oe	Ca	1	1
Anogam_AGAP006471-RA	0	0.0997009	0.114034	OeCa M	Oe	Ca	1	1
Anogam_AGAP006475-RA	0	0.0937188	0.114034	OeCa M	Oe	Ca	1	1
Anogam_AGAP006480-RA	0.0398918	0.0638086	0.114034	OeCa M	Oe	Ca	0.80373	0.763838
Anogam_AGAP006480-RB	-0.0398918	0.0623131	0.114034	OeCa M	Oe	Ca	0.19627	0.236162
Anogam_AGAP006481-RA	NA	NA	NA	OeCa M	Oe	Ca	NA	1
Anogam_AGAP006482-RA	0	0.0987039	0.114034	OeCa M	Oe	Ca	1	1
Anogam_AGAP006483-RA	0	0.0967099	0.114034	OeCa M	Oe	Ca	1	1
Anogam_AGAP028657-RA	NA	NA	NA	OeCa M	Oe	Ca	NA	1
Anogam_AGAP006486-RA	NA	NA	NA	OeCa M	Oe	Ca	NA	1
Anogam_AGAP006488-RA	NA	NA	NA	OeCa M	Oe	Ca	NA	NA
Anogam_AGAP006489-RA	NA	NA	NA	OeCa M	Oe	Ca	NA	1
Anogam_AGAP028656-RA	NA	NA	NA	OeCa M	Oe	Ca	NA	NA
Anogam_AGAP006490-RA	0	0.105184	0.114034	OeCa M	Oe	Ca	1	1
Anogam_AGAP006494-RA	0	0.082505	0.114034	OeCa M	Oe	Ca	1	1
Anogam_AGAP006495-RA	0	0.103689	0.114034	OeCa M	Oe	Ca	1	1
Anogam_AGAP006496-RA	0	0.0937188	0.114034	OeCa M	Oe	Ca	1	1
Anogam_AGAP006499-RA	0	0.0917248	0.114034	OeCa M	Oe	Ca	1	1
Anogam_AGAP006500-RA	NA	NA	NA	OeCa M	Oe	Ca	NA	1
Anogam_AGAP006501-RA	NA	NA	NA	OeCa M	Oe	Ca	NA	1
Anogam_AGAP006502-RA	NA	NA	NA	OeCa M	Oe	Ca	NA	1
Anogam_AGAP006503-RA	NA	NA	NA	OeCa M	Oe	Ca	NA	1
Anogam_AGAP006504-RA	0	0.0887338	0.114034	OeCa M	Oe	Ca	1	1
Anogam_AGAP006505-RA	NA	NA	NA	OeCa M	Oe	Ca	NA	NA
Anogam_AGAP006506-RA	0	0.0987039	0.114034	OeCa M	Oe	Ca	1	1
Anogam_AGAP006508-RB	0.0127939	0.0792622	0.114034	OeCa M	Oe	Ca	0.979066	0.966272
Anogam_AGAP006508-RA	-0.0127939	0.0727817	0.114034	OeCa M	Oe	Ca	0.020934	0.0337279
Anogam_AGAP006510-RA	0	0.0887338	0.114034	OeCa M	Oe	Ca	1	1
Anogam_AGAP006512-RA	0	0.0957129	0.114034	OeCa M	Oe	Ca	1	1
Anogam_AGAP006513-RA	0	0.082505	0.114034	OeCa M	Oe	Ca	1	1
Anogam_AGAP006520-RA	0	0.082505	0.114034	OeCa M	Oe	Ca	1	1
Anogam_AGAP006521-RA	0	0.082505	0.114034	OeCa M	Oe	Ca	1	1
Anogam_AGAP006522-RA	0	0.082505	0.114034	OeCa M	Oe	Ca	1	1
Anogam_AGAP006523-RA	0	0.082505	0.114034	OeCa M	Oe	Ca	1	1
Anogam_AGAP006524-RA	0	0.082505	0.114034	OeCa M	Oe	Ca	1	1
Anogam_AGAP006525-RA	0	0.082505	0.114034	OeCa M	Oe	Ca	1	1
Anogam_AGAP006526-RA	0	0.082505	0.114034	OeCa M	Oe	Ca	1	1
Anogam_AGAP006527-RA	0	0.082505	0.114034	OeCa M	Oe	Ca	1	1
Anogam_AGAP006529-RA	0	0.082505	0.114034	OeCa M	Oe	Ca	1	1
Anogam_AGAP013364-RA	0	0.082505	0.114034	OeCa M	Oe	Ca	1	1
Anogam_AGAP006530-RA	0	0.0877368	0.114034	OeCa M	Oe	Ca	1	1
Anogam_AGAP013488-RA	0	0.0932203	0.114034	OeCa M	Oe	Ca	1	1
Anogam_AGAP006531-RA	0	0.0832502	0.114034	OeCa M	Oe	Ca	1	1
Anogam_AGAP006534-RB	-0.0921645	0.0328032	0.114034	OeCa M	Oe	Ca	0.201531	0.293695
Anogam_AGAP006534-RA	0.0921645	0.0269192	0.114034	OeCa M	Oe	Ca	0.798469	0.706305
Anogam_AGAP006542-RA	0	0.082505	0.114034	OeCa M	Oe	Ca	1	1
Anogam_AGAP028608-RA	0	0.082505	0.114034	OeCa M	Oe	Ca	1	1
Anogam_AGAP006549-RA	0	0.082505	0.114034	OeCa M	Oe	Ca	1	1
Anogam_AGAP006550-RA	NA	NA	NA	OeCa M	Oe	Ca	NA	1
Anogam_AGAP006551-RA	NA	NA	NA	OeCa M	Oe	Ca	NA	1
Anogam_AGAP006552-RA	NA	NA	NA	OeCa M	Oe	Ca	NA	1
Anogam_AGAP006553-RA	NA	NA	NA	OeCa M	Oe	Ca	1	NA
Anogam_AGAP006554-RA	NA	NA	NA	OeCa M	Oe	Ca	NA	NA
Anogam_AGAP006556-RA	NA	NA	NA	OeCa M	Oe	Ca	1	NA
Anogam_AGAP006557-RA	NA	NA	NA	OeCa M	Oe	Ca	1	NA
Anogam_AGAP006558-RA	NA	NA	NA	OeCa M	Oe	Ca	NA	NA
Anogam_AGAP006559-RA	NA	NA	NA	OeCa M	Oe	Ca	NA	NA
Anogam_AGAP006562-RA	0	0.102692	0.114034	OeCa M	Oe	Ca	1	1
Anogam_AGAP006564-RA	NA	NA	NA	OeCa M	Oe	Ca	NA	1
Anogam_AGAP006566-RA	0	0.0922233	0.114034	OeCa M	Oe	Ca	1	1
Anogam_AGAP006567-RA	NA	NA	NA	OeCa M	Oe	Ca	1	NA
Anogam_AGAP006568-RA	0	0.0893588	0.114034	OeCa M	Oe	Ca	1	1
Anogam_AGAP006571-RA	0	0.0927461	0.114034	OeCa M	Oe	Ca	1	1
Anogam_AGAP006573-RA	0	0.0907278	0.114034	OeCa M	Oe	Ca	1	1
Anogam_AGAP006575-RA	0	0.0917248	0.114034	OeCa M	Oe	Ca	1	1
Anogam_AGAP006576-RC	0.0297501	0.0578265	0.114034	OeCa M	Oe	Ca	0.191467	0.161717
Anogam_AGAP006576-RB	0.0939213	0.0328032	0.114034	OeCa M	Oe	Ca	0.545319	0.451398
Anogam_AGAP006576-RA	-0.123671	0.0329013	0.114034	OeCa M	Oe	Ca	0.263214	0.386886
Anogam_AGAP006577-RA	0	0.10668	0.114034	OeCa M	Oe	Ca	1	1
Anogam_AGAP006578-RA	0	0.0902293	0.114034	OeCa M	Oe	Ca	1	1
Anogam_AGAP006579-RA	-0.0472834	0.0437376	0.114034	OeCa M	Oe	Ca	0.630071	0.677354
Anogam_AGAP006579-RB	0.0472834	0.0608175	0.114034	OeCa M	Oe	Ca	0.369929	0.322646
Anogam_AGAP006581-RA	0	0.0997009	0.114034	OeCa M	Oe	Ca	1	1
Anogam_AGAP006582-RD	-0.118383	0.0299103	0.114034	OeCa M	Oe	Ca	0.0777811	0.196164
Anogam_AGAP006582-RA	0.252556	0.00997009	0.114034	OeCa M	Oe	Ca	0.310024	0.0574678
Anogam_AGAP006582-RB	0	0.082505	0.114034	OeCa M	Oe	Ca	0	0
Anogam_AGAP006582-RC	-0.134173	0.0248509	0.114034	OeCa M	Oe	Ca	0.612195	0.746368
Anogam_AGAP006583-RA	0	0.082505	0.114034	OeCa M	Oe	Ca	1	1
Anogam_AGAP028458-RA	0	0.082505	0.114034	OeCa M	Oe	Ca	1	1
Anogam_AGAP006584-RA	0	0.10668	0.114034	OeCa M	Oe	Ca	1	1
Anogam_AGAP028459-RA	NA	NA	NA	OeCa M	Oe	Ca	1	NA
Anogam_AGAP006585-RA	0	0.10319	0.114034	OeCa M	Oe	Ca	1	1
Anogam_AGAP006586-RA	0	0.0982054	0.114034	OeCa M	Oe	Ca	1	1
Anogam_AGAP006587-RA	0	0.0967099	0.114034	OeCa M	Oe	Ca	1	1
Anogam_AGAP006588-RA	0	0.100199	0.114034	OeCa M	Oe	Ca	1	1
Anogam_AGAP028666-RA	0	0.0937188	0.114034	OeCa M	Oe	Ca	1	1
Anogam_AGAP028665-RA	0	0.0897308	0.114034	OeCa M	Oe	Ca	1	1
Anogam_AGAP006590-RC	-0.11498	0.0284148	0.114034	OeCa M	Oe	Ca	0.0201995	0.13518
Anogam_AGAP006590-RD	-0.00335558	0.0932203	0.114034	OeCa M	Oe	Ca	0.722462	0.725818
Anogam_AGAP006590-RA	0.0330022	0.0682951	0.114034	OeCa M	Oe	Ca	0.101549	0.0685463
Anogam_AGAP006590-RB	0.0853336	0.0423729	0.114034	OeCa M	Oe	Ca	0.15579	0.0704561
Anogam_AGAP006591-RA	NA	NA	NA	OeCa M	Oe	Ca	NA	1
Anogam_AGAP006592-RA	0	0.0957129	0.114034	OeCa M	Oe	Ca	1	1
Anogam_AGAP006593-RA	0	0.111167	0.114034	OeCa M	Oe	Ca	1	1
Anogam_AGAP006594-RA	-0.310495	0.00695825	0.114034	OeCa M	Oe	Ca	0.689505	1
Anogam_AGAP006594-RB	0.310495	0.00695825	0.114034	OeCa M	Oe	Ca	0.310495	0
Anogam_AGAP006597-RA	NA	NA	NA	OeCa M	Oe	Ca	NA	1
Anogam_AGAP006599-RA	0	0.0997009	0.114034	OeCa M	Oe	Ca	1	1
Anogam_AGAP006602-RA	0	0.0962114	0.114034	OeCa M	Oe	Ca	1	1
Anogam_AGAP006604-RA	0	0.0977069	0.114034	OeCa M	Oe	Ca	1	1
Anogam_AGAP006606-RA	0	0.0967099	0.114034	OeCa M	Oe	Ca	1	1
Anogam_AGAP006607-RA	-0.00322234	0.0967099	0.114034	OeCa M	Oe	Ca	0.992867	0.99609
Anogam_AGAP006607-RB	0.00322234	0.0837488	0.114034	OeCa M	Oe	Ca	0.00713266	0.00391032
Anogam_AGAP006612-RA	0	0.106181	0.114034	OeCa M	Oe	Ca	1	1
Anogam_AGAP006614-RA	0	0.109172	0.114034	OeCa M	Oe	Ca	1	1
Anogam_AGAP006616-RA	0	0.0912263	0.114034	OeCa M	Oe	Ca	1	1
Anogam_AGAP006619-RA	0	0.104187	0.114034	OeCa M	Oe	Ca	1	1
Anogam_AGAP006621-RA	0	0.082505	0.114034	OeCa M	Oe	Ca	1	1
Anogam_AGAP006623-RA	0	0.082505	0.114034	OeCa M	Oe	Ca	1	1
Anogam_AGAP006625-RA	0	0.0937188	0.114034	OeCa M	Oe	Ca	1	1
Anogam_AGAP006627-RA	0	0.082505	0.114034	OeCa M	Oe	Ca	1	1
Anogam_AGAP006631-RA	0	0.082505	0.114034	OeCa M	Oe	Ca	1	1
Anogam_AGAP006633-RA	0.211775	0.0149105	0.114034	OeCa M	Oe	Ca	0.949636	0.737861
Anogam_AGAP006633-RB	-0.211775	0.0149105	0.114034	OeCa M	Oe	Ca	0.0503636	0.262139
Anogam_AGAP006634-RA	0	0.082505	0.114034	OeCa M	Oe	Ca	1	1
Anogam_AGAP006635-RA	0	0.082505	0.114034	OeCa M	Oe	Ca	1	1
Anogam_AGAP006637-RA	-0.0827401	0.0337972	0.114034	OeCa M	Oe	Ca	0	0.0827401
Anogam_AGAP006637-RB	0.0827401	0.0337972	0.114034	OeCa M	Oe	Ca	1	0.91726
Anogam_AGAP006638-RA	0	0.082505	0.114034	OeCa M	Oe	Ca	1	1
Anogam_AGAP006639-RA	NA	NA	NA	OeCa M	Oe	Ca	NA	NA
Anogam_AGAP006644-RA	0	0.082505	0.114034	OeCa M	Oe	Ca	1	1
Anogam_AGAP006649-RA	0	0.082505	0.114034	OeCa M	Oe	Ca	1	1
Anogam_AGAP006651-RA	0	0.082505	0.114034	OeCa M	Oe	Ca	1	1
Anogam_AGAP006656-RB	-0.0840528	0.0337972	0.114034	OeCa M	Oe	Ca	0.8147	0.898753
Anogam_AGAP006656-RA	0.0840528	0.0337972	0.114034	OeCa M	Oe	Ca	0.1853	0.101247
Anogam_AGAP006657-RA	0	0.082505	0.114034	OeCa M	Oe	Ca	1	1
Anogam_AGAP006659-RA	0	0.082505	0.114034	OeCa M	Oe	Ca	1	1
Anogam_AGAP006660-RC	-0.00205367	0.0977069	0.114034	OeCa M	Oe	Ca	0.00228317	0.00433684
Anogam_AGAP006660-RB	0.118733	0.028827	0.114034	OeCa M	Oe	Ca	0.748274	0.629542
Anogam_AGAP006660-RA	-0.116679	0.0363908	0.114034	OeCa M	Oe	Ca	0.249443	0.366122
Anogam_AGAP006662-RA	0	0.101196	0.114034	OeCa M	Oe	Ca	1	1
Anogam_AGAP006663-RA	0	0.102692	0.114034	OeCa M	Oe	Ca	1	1
Anogam_AGAP006666-RA	0	0.0992024	0.114034	OeCa M	Oe	Ca	1	1
Anogam_AGAP006667-RA	0	0.0962114	0.114034	OeCa M	Oe	Ca	1	1
Anogam_AGAP006668-RA	0	0.0802592	0.114034	OeCa M	Oe	Ca	1	1
Anogam_AGAP006671-RA	0	0.100698	0.114034	OeCa M	Oe	Ca	1	1
Anogam_AGAP006672-RA	0	0.0887338	0.114034	OeCa M	Oe	Ca	1	1
Anogam_AGAP029091-RA	0	0.110169	0.114034	OeCa M	Oe	Ca	1	1
Anogam_AGAP006678-RA	0	0.0957129	0.114034	OeCa M	Oe	Ca	1	1
Anogam_AGAP006681-RA	0	0.102692	0.114034	OeCa M	Oe	Ca	1	1
Anogam_AGAP006682-RA	0	0.10319	0.114034	OeCa M	Oe	Ca	1	1
Anogam_AGAP006684-RA	0	0.0967099	0.114034	OeCa M	Oe	Ca	1	1
Anogam_AGAP006687-RA	0	0.0957129	0.114034	OeCa M	Oe	Ca	1	1
Anogam_AGAP006689-RA	0	0.101695	0.114034	OeCa M	Oe	Ca	1	1
Anogam_AGAP006691-RA	0	0.101196	0.114034	OeCa M	Oe	Ca	1	1
Anogam_AGAP006696-RA	0	0.0917248	0.114034	OeCa M	Oe	Ca	1	1
Anogam_AGAP006698-RA	0	0.109671	0.114034	OeCa M	Oe	Ca	1	1
Anogam_AGAP006699-RA	0	0.0802592	0.114034	OeCa M	Oe	Ca	1	1
Anogam_AGAP006700-RA	0	0.105184	0.114034	OeCa M	Oe	Ca	1	1
Anogam_AGAP006701-RA	0.176095	0.0174477	0.114034	OeCa M	Oe	Ca	0.53554	0.359445
Anogam_AGAP006701-RB	-0.126413	0.0229312	0.114034	OeCa M	Oe	Ca	0.313757	0.44017
Anogam_AGAP006701-RC	-0.0496819	0.0518445	0.114034	OeCa M	Oe	Ca	0.150703	0.200385
Anogam_AGAP006702-RB	0.184733	0.0159521	0.114034	OeCa M	Oe	Ca	0.520039	0.335307
Anogam_AGAP006702-RA	-0.184733	0.0234297	0.114034	OeCa M	Oe	Ca	0.479961	0.664693
Anogam_AGAP006703-RA	NA	NA	NA	OeCa M	Oe	Ca	NA	NA
Anogam_AGAP006705-RA	0	0.0982054	0.114034	OeCa M	Oe	Ca	1	1
Anogam_AGAP006706-RA	0	0.10319	0.114034	OeCa M	Oe	Ca	1	1
Anogam_AGAP006707-RA	0	0.103689	0.114034	OeCa M	Oe	Ca	1	1
Anogam_AGAP006708-RA	NA	NA	NA	OeCa M	Oe	Ca	NA	1
Anogam_AGAP006709-RA	0	0.082505	0.114034	OeCa M	Oe	Ca	1	1
Anogam_AGAP006710-RA	0	0.108674	0.114034	OeCa M	Oe	Ca	1	1
Anogam_AGAP006712-RA	0	0.100199	0.114034	OeCa M	Oe	Ca	1	1
Anogam_AGAP029046-RA	0	0.0932203	0.114034	OeCa M	Oe	Ca	1	1
Anogam_AGAP006714-RA	0	0.0997009	0.114034	OeCa M	Oe	Ca	1	1
Anogam_AGAP006718-RA	0	0.104686	0.114034	OeCa M	Oe	Ca	1	1
Anogam_AGAP006719-RA	0	0.0947159	0.114034	OeCa M	Oe	Ca	1	1
Anogam_AGAP006720-RA	0	0.082505	0.114034	OeCa M	Oe	Ca	1	1
Anogam_AGAP006721-RB	0.0613759	0.0338983	0.114034	OeCa M	Oe	Ca	0.422911	0.361535
Anogam_AGAP006721-RA	-0.0613759	0.0397614	0.114034	OeCa M	Oe	Ca	0.577089	0.638465
Anogam_AGAP006723-RA	0	0.100199	0.114034	OeCa M	Oe	Ca	1	1
Anogam_AGAP006724-RA	0	0.0942173	0.114034	OeCa M	Oe	Ca	1	1
Anogam_AGAP006725-RA	0	0.101695	0.114034	OeCa M	Oe	Ca	1	1
Anogam_AGAP006727-RA	0	0.0872383	0.114034	OeCa M	Oe	Ca	1	1
Anogam_AGAP006729-RA	0	0.104187	0.114034	OeCa M	Oe	Ca	1	1
Anogam_AGAP006730-RA	0	0.082505	0.114034	OeCa M	Oe	Ca	1	1
Anogam_AGAP006731-RA	0	0.10319	0.114034	OeCa M	Oe	Ca	1	1
Anogam_AGAP006734-RA	0	0.101196	0.114034	OeCa M	Oe	Ca	1	1
Anogam_AGAP006735-RA	0	0.0807577	0.114034	OeCa M	Oe	Ca	1	1
Anogam_AGAP028461-RA	0	0.0932203	0.114034	OeCa M	Oe	Ca	1	1
Anogam_AGAP028400-RA	0	0.082505	0.114034	OeCa M	Oe	Ca	1	1
Anogam_AGAP006741-RA	0	0.082505	0.114034	OeCa M	Oe	Ca	1	1
Anogam_AGAP006747-RA	0	0.0867398	0.114034	OeCa M	Oe	Ca	1	1
Anogam_AGAP006748-RA	0	0.105683	0.114034	OeCa M	Oe	Ca	1	1
Anogam_AGAP029116-RA	0	0.0957129	0.114034	OeCa M	Oe	Ca	1	1
Anogam_AGAP028759-RA	NA	NA	NA	OeCa M	Oe	Ca	NA	NA
Anogam_AGAP028241-RA	NA	NA	NA	OeCa M	Oe	Ca	NA	1
Anogam_AGAP006752-RA	NA	NA	NA	OeCa M	Oe	Ca	NA	NA
Anogam_AGAP028760-RA	0	0.0872383	0.114034	OeCa M	Oe	Ca	1	1
Anogam_AGAP028354-RA	0	0.105683	0.114034	OeCa M	Oe	Ca	1	1
Anogam_AGAP006756-RA	0	0.0997009	0.114034	OeCa M	Oe	Ca	1	1
Anogam_AGAP006759-RA	0	0.110668	0.114034	OeCa M	Oe	Ca	1	1
Anogam_AGAP006760-RA	0	0.106181	0.114034	OeCa M	Oe	Ca	1	1
Anogam_AGAP006761-RA	0	0.0962114	0.114034	OeCa M	Oe	Ca	1	1
Anogam_AGAP006763-RA	0	0.111665	0.114034	OeCa M	Oe	Ca	1	1
Anogam_AGAP006765-RA	0.271887	0.0124626	0.114034	OeCa M	Oe	Ca	0.875139	0.603252
Anogam_AGAP006765-RB	-0.271887	0.00894632	0.114034	OeCa M	Oe	Ca	0.124861	0.396748
Anogam_AGAP006768-RA	0	0.0997009	0.114034	OeCa M	Oe	Ca	1	1
Anogam_AGAP006770-RA	0	0.0942173	0.114034	OeCa M	Oe	Ca	1	1
Anogam_AGAP006774-RA	0	0.082505	0.114034	OeCa M	Oe	Ca	1	1
Anogam_AGAP006776-RA	0	0.109671	0.114034	OeCa M	Oe	Ca	1	1
Anogam_AGAP006778-RA	0	0.102193	0.114034	OeCa M	Oe	Ca	1	1
Anogam_AGAP006779-RA	0	0.082505	0.114034	OeCa M	Oe	Ca	1	1
Anogam_AGAP006781-RA	0	0.105184	0.114034	OeCa M	Oe	Ca	1	1
Anogam_AGAP006782-RA	0	0.111167	0.114034	OeCa M	Oe	Ca	1	1
Anogam_AGAP006784-RA	0	0.082505	0.114034	OeCa M	Oe	Ca	1	1
Anogam_AGAP006789-RA	0.095022	0.0363908	0.114034	OeCa M	Oe	Ca	0.425568	0.330546
Anogam_AGAP006789-RB	-0.095022	0.0368893	0.114034	OeCa M	Oe	Ca	0.574432	0.669454
Anogam_AGAP006791-RA	0	0.0912263	0.114034	OeCa M	Oe	Ca	1	1
Anogam_AGAP006792-RA	0	0.0877368	0.114034	OeCa M	Oe	Ca	1	1
Anogam_AGAP006793-RA	0	0.110169	0.114034	OeCa M	Oe	Ca	1	1
Anogam_AGAP006795-RA	0	0.111665	0.114034	OeCa M	Oe	Ca	1	1
Anogam_AGAP006796-RA	0	0.082505	0.114034	OeCa M	Oe	Ca	1	1
Anogam_AGAP006797-RA	0	0.0952144	0.114034	OeCa M	Oe	Ca	1	1
Anogam_AGAP006799-RA	0	0.105683	0.114034	OeCa M	Oe	Ca	1	1
Anogam_AGAP006802-RA	0	0.0947159	0.114034	OeCa M	Oe	Ca	1	1
Anogam_AGAP006803-RA	0	0.082505	0.114034	OeCa M	Oe	Ca	1	1
Anogam_AGAP006807-RA	0	0.100199	0.114034	OeCa M	Oe	Ca	1	1
Anogam_AGAP006808-RA	0	0.082505	0.114034	OeCa M	Oe	Ca	1	1
Anogam_AGAP006809-RA	0	0.110169	0.114034	OeCa M	Oe	Ca	1	1
Anogam_AGAP006811-RA	0	0.107178	0.114034	OeCa M	Oe	Ca	1	1
Anogam_AGAP028659-RA	NA	NA	NA	OeCa M	Oe	Ca	NA	1
Anogam_AGAP028658-RA	NA	NA	NA	OeCa M	Oe	Ca	NA	1
Anogam_AGAP006814-RA	0	0.111167	0.114034	OeCa M	Oe	Ca	1	1
Anogam_AGAP006817-RA	0	0.0937188	0.114034	OeCa M	Oe	Ca	1	1
Anogam_AGAP006824-RA	0	0.0947159	0.114034	OeCa M	Oe	Ca	1	1
Anogam_AGAP006826-RA	0	0.082505	0.114034	OeCa M	Oe	Ca	1	1
Anogam_AGAP006827-RA	0	0.0967099	0.114034	OeCa M	Oe	Ca	1	1
Anogam_AGAP006834-RA	NA	NA	NA	OeCa M	Oe	Ca	NA	1
Anogam_AGAP028401-RA	NA	NA	NA	OeCa M	Oe	Ca	NA	NA
Anogam_AGAP006836-RA	NA	NA	NA	OeCa M	Oe	Ca	NA	NA
Anogam_AGAP006844-RA	NA	NA	NA	OeCa M	Oe	Ca	NA	NA
Anogam_AGAP006845-RA	0	0.113161	0.114478	OeCa M	Oe	Ca	1	1
Anogam_AGAP006847-RA	NA	NA	NA	OeCa M	Oe	Ca	NA	NA
Anogam_AGAP006853-RA	NA	NA	NA	OeCa M	Oe	Ca	NA	NA
Anogam_AGAP006854-RA	NA	NA	NA	OeCa M	Oe	Ca	NA	NA
Anogam_AGAP006855-RA	NA	NA	NA	OeCa M	Oe	Ca	NA	NA
Anogam_AGAP006856-RA	NA	NA	NA	OeCa M	Oe	Ca	NA	NA
Anogam_AGAP006857-RA	NA	NA	NA	OeCa M	Oe	Ca	NA	NA
Anogam_AGAP006858-RA	NA	NA	NA	OeCa M	Oe	Ca	NA	NA
Anogam_AGAP006860-RA	NA	NA	NA	OeCa M	Oe	Ca	NA	NA
Anogam_AGAP006863-RA	NA	NA	NA	OeCa M	Oe	Ca	NA	NA
Anogam_AGAP006865-RA	NA	NA	NA	OeCa M	Oe	Ca	NA	NA
Anogam_AGAP006869-RA	NA	NA	NA	OeCa M	Oe	Ca	NA	1
Anogam_AGAP006871-RA	0	0.0972084	0.114034	OeCa M	Oe	Ca	1	1
Anogam_AGAP006873-RA	0	0.0977069	0.114034	OeCa M	Oe	Ca	1	1
Anogam_AGAP006878-RA	0	0.082505	0.114034	OeCa M	Oe	Ca	1	1
Anogam_AGAP006881-RA	0	0.082505	0.114034	OeCa M	Oe	Ca	1	1
Anogam_AGAP006882-RA	0	0.082505	0.114034	OeCa M	Oe	Ca	1	1
Anogam_AGAP006884-RA	0	0.082505	0.114034	OeCa M	Oe	Ca	1	1
Anogam_AGAP006888-RA	0	0.082505	0.114034	OeCa M	Oe	Ca	1	1
Anogam_AGAP006891-RA	0	0.082505	0.114034	OeCa M	Oe	Ca	1	1
Anogam_AGAP029136-RA	NA	NA	NA	OeCa M	Oe	Ca	1	NA
Anogam_AGAP029142-RA	0	0.102692	0.114034	OeCa M	Oe	Ca	1	1
Anogam_AGAP029137-RA	0	0.100199	0.114034	OeCa M	Oe	Ca	1	1
Anogam_AGAP029158-RA	0	0.104187	0.114034	OeCa M	Oe	Ca	1	1
Anogam_AGAP006894-RA	0	0.0962114	0.114034	OeCa M	Oe	Ca	1	1
Anogam_AGAP006896-RA	0	0.0947159	0.114034	OeCa M	Oe	Ca	1	1
Anogam_AGAP006898-RA	0	0.105184	0.114034	OeCa M	Oe	Ca	1	1
Anogam_AGAP029170-RA	0	0.0937188	0.114034	OeCa M	Oe	Ca	1	1
Anogam_AGAP029171-RA	0	0.0847458	0.114034	OeCa M	Oe	Ca	1	1
Anogam_AGAP006900-RA	0	0.100698	0.114034	OeCa M	Oe	Ca	1	1
Anogam_AGAP006901-RC	0.0349417	0.0658026	0.114034	OeCa M	Oe	Ca	0.221459	0.186517
Anogam_AGAP006901-RA	-0.0193057	0.0586481	0.114034	OeCa M	Oe	Ca	0.0141066	0.0334122
Anogam_AGAP006901-RB	-0.0156361	0.0727817	0.114034	OeCa M	Oe	Ca	0.764434	0.78007
Anogam_AGAP006908-RA	0	0.0922233	0.114034	OeCa M	Oe	Ca	1	1
Anogam_AGAP006913-RA	0	0.0992024	0.114034	OeCa M	Oe	Ca	1	1
Anogam_AGAP006917-RA	0	0.0837488	0.114034	OeCa M	Oe	Ca	1	1
Anogam_AGAP006918-RA	0	0.0807577	0.114034	OeCa M	Oe	Ca	1	1
Anogam_AGAP006923-RA	0	0.0887338	0.114034	OeCa M	Oe	Ca	1	1
Anogam_AGAP006924-RA	0	0.0942173	0.114034	OeCa M	Oe	Ca	1	1
Anogam_AGAP006925-RA	0	0.0972084	0.114034	OeCa M	Oe	Ca	1	1
Anogam_AGAP006926-RA	0	0.0922233	0.114034	OeCa M	Oe	Ca	1	1
Anogam_AGAP006927-RA	0	0.0972084	0.114034	OeCa M	Oe	Ca	1	1
Anogam_AGAP006928-RA	0	0.0992024	0.114034	OeCa M	Oe	Ca	1	1
Anogam_AGAP006929-RA	0	0.082505	0.114034	OeCa M	Oe	Ca	1	1
Anogam_AGAP006932-RA	0	0.0892323	0.114034	OeCa M	Oe	Ca	1	1
Anogam_AGAP006934-RA	0	0.0882353	0.114034	OeCa M	Oe	Ca	1	1
Anogam_AGAP006935-RB	0	0.0972084	0.114034	OeCa M	Oe	Ca	0	0
Anogam_AGAP006935-RC	-0.0254727	0.0707876	0.114034	OeCa M	Oe	Ca	0.172365	0.197838
Anogam_AGAP006935-RA	0.0254727	0.0727817	0.114034	OeCa M	Oe	Ca	0.827635	0.802162
Anogam_AGAP006937-RA	-0.246213	0.0129611	0.114034	OeCa M	Oe	Ca	0.0442394	0.290452
Anogam_AGAP006937-RB	0.0531233	0.0598205	0.114034	OeCa M	Oe	Ca	0.579793	0.52667
Anogam_AGAP006937-RC	0.193089	0.0149551	0.114034	OeCa M	Oe	Ca	0.375967	0.182878
Anogam_AGAP006938-RA	0	0.0812562	0.114034	OeCa M	Oe	Ca	1	1
Anogam_AGAP006940-RA	0	0.111167	0.114034	OeCa M	Oe	Ca	1	1
Anogam_AGAP006941-RA	0	0.109671	0.114034	OeCa M	Oe	Ca	1	1
Anogam_AGAP006943-RA	0	0.082505	0.114034	OeCa M	Oe	Ca	1	1
Anogam_AGAP006946-RA	0	0.108175	0.114034	OeCa M	Oe	Ca	1	1
Anogam_AGAP006948-RB	0.116141	0.0279163	0.114034	OeCa M	Oe	Ca	0.151086	0.0349451
Anogam_AGAP006948-RA	-0.116141	0.0229312	0.114034	OeCa M	Oe	Ca	0.848914	0.965055
Anogam_AGAP006949-RA	0	0.107178	0.114034	OeCa M	Oe	Ca	1	1
Anogam_AGAP006953-RA	0	0.0982054	0.114034	OeCa M	Oe	Ca	1	1
Anogam_AGAP006954-RA	-0.0289634	0.0526839	0.114034	OeCa M	Oe	Ca	0.333333	0.362297
Anogam_AGAP006954-RB	0.363832	0.00747757	0.114034	OeCa M	Oe	Ca	0.573884	0.210052
Anogam_AGAP006954-RC	-0.334869	0.00897308	0.114034	OeCa M	Oe	Ca	0.0927823	0.427651
Anogam_AGAP006955-RA	0	0.100698	0.114034	OeCa M	Oe	Ca	1	1
Anogam_AGAP006958-RA	0	0.0952144	0.114034	OeCa M	Oe	Ca	1	1
Anogam_AGAP006963-RA	0	0.0967099	0.114034	OeCa M	Oe	Ca	1	1
Anogam_AGAP006964-RA	0	0.104686	0.114034	OeCa M	Oe	Ca	1	1
Anogam_AGAP006967-RA	0	0.0947159	0.114034	OeCa M	Oe	Ca	1	1
Anogam_AGAP006971-RA	NA	NA	NA	OeCa M	Oe	Ca	NA	1
Anogam_AGAP006973-RA	NA	NA	NA	OeCa M	Oe	Ca	NA	NA
Anogam_AGAP006974-RA	0	0.0862413	0.114034	OeCa M	Oe	Ca	1	1
Anogam_AGAP006975-RA	0	0.102692	0.114034	OeCa M	Oe	Ca	1	1
Anogam_AGAP006977-RA	0	0.112164	0.114096	OeCa M	Oe	Ca	1	1
Anogam_AGAP006978-RA	NA	NA	NA	OeCa M	Oe	Ca	NA	NA
Anogam_AGAP006979-RA	NA	NA	NA	OeCa M	Oe	Ca	NA	NA
Anogam_AGAP006980-RA	NA	NA	NA	OeCa M	Oe	Ca	NA	1
Anogam_AGAP006981-RA	NA	NA	NA	OeCa M	Oe	Ca	NA	NA
Anogam_AGAP006982-RA	NA	NA	NA	OeCa M	Oe	Ca	NA	NA
Anogam_AGAP006983-RA	NA	NA	NA	OeCa M	Oe	Ca	NA	NA
Anogam_AGAP006984-RA	NA	NA	NA	OeCa M	Oe	Ca	NA	1
Anogam_AGAP006985-RA	NA	NA	NA	OeCa M	Oe	Ca	NA	1
Anogam_AGAP006987-RA	0	0.10668	0.114034	OeCa M	Oe	Ca	1	1
Anogam_AGAP006988-RA	0	0.0947159	0.114034	OeCa M	Oe	Ca	1	1
Anogam_AGAP006989-RA	0	0.100698	0.114034	OeCa M	Oe	Ca	1	1
Anogam_AGAP006991-RA	0	0.0902293	0.114034	OeCa M	Oe	Ca	1	1
Anogam_AGAP006992-RA	0	0.0992024	0.114034	OeCa M	Oe	Ca	1	1
Anogam_AGAP006994-RB	-0.181683	0.0168986	0.114034	OeCa M	Oe	Ca	0.222311	0.403994
Anogam_AGAP006994-RA	0.181683	0.0168986	0.114034	OeCa M	Oe	Ca	0.777689	0.596006
Anogam_AGAP006995-RA	0	0.111167	0.114034	OeCa M	Oe	Ca	1	1
Anogam_AGAP006997-RA	0	0.100199	0.114034	OeCa M	Oe	Ca	1	1
Anogam_AGAP007000-RA	0	0.0957129	0.114034	OeCa M	Oe	Ca	1	1
Anogam_AGAP007002-RA	0	0.108674	0.114034	OeCa M	Oe	Ca	1	1
Anogam_AGAP007003-RA	0	0.102692	0.114034	OeCa M	Oe	Ca	1	1
Anogam_AGAP007006-RB	0.131215	0.0299103	0.114034	OeCa M	Oe	Ca	0.939483	0.808268
Anogam_AGAP007006-RA	-0.052829	0.05334	0.114034	OeCa M	Oe	Ca	0.0605163	0.113345
Anogam_AGAP007006-RC	-0.0783859	0.0378863	0.114034	OeCa M	Oe	Ca	4.23664e-07	0.0783863
Anogam_AGAP007007-RA	0	0.10319	0.114034	OeCa M	Oe	Ca	1	1
Anogam_AGAP007008-RA	0	0.082505	0.114034	OeCa M	Oe	Ca	1	1
Anogam_AGAP007012-RB	0.131009	0.0229312	0.114034	OeCa M	Oe	Ca	0.760068	0.629059
Anogam_AGAP007012-RA	-0.131009	0.0189432	0.114034	OeCa M	Oe	Ca	0.239932	0.370941
Anogam_AGAP007018-RA	0	0.0932203	0.114034	OeCa M	Oe	Ca	1	1
Anogam_AGAP007020-RA	0	0.0937188	0.114034	OeCa M	Oe	Ca	1	1
Anogam_AGAP007022-RA	0	0.110169	0.114034	OeCa M	Oe	Ca	1	1
Anogam_AGAP007023-RA	0	0.104686	0.114034	OeCa M	Oe	Ca	1	1
Anogam_AGAP007026-RA	0	0.0992024	0.114034	OeCa M	Oe	Ca	1	1
Anogam_AGAP007027-RA	0	0.11665	0.116819	OeCa M	Oe	Ca	1	1
Anogam_AGAP007028-RA	0	0.0997009	0.114034	OeCa M	Oe	Ca	1	1
Anogam_AGAP028734-RA	NA	NA	NA	OeCa M	Oe	Ca	NA	1
Anogam_AGAP028733-RA	NA	NA	NA	OeCa M	Oe	Ca	NA	1
Anogam_AGAP028735-RA	0	0.0997009	0.114034	OeCa M	Oe	Ca	1	1
Anogam_AGAP028463-RA	0	0.103689	0.114034	OeCa M	Oe	Ca	1	1
Anogam_AGAP007031-RA	0	0.0957129	0.114034	OeCa M	Oe	Ca	1	1
Anogam_AGAP007033-RA	0	0.0947159	0.114034	OeCa M	Oe	Ca	1	1
Anogam_AGAP007034-RA	0	0.0997009	0.114034	OeCa M	Oe	Ca	1	1
Anogam_AGAP007035-RA	0	0.0967099	0.114034	OeCa M	Oe	Ca	1	1
Anogam_AGAP007036-RA	0	0.0922233	0.114034	OeCa M	Oe	Ca	1	1
Anogam_AGAP007037-RA	0	0.100698	0.114034	OeCa M	Oe	Ca	1	1
Anogam_AGAP007038-RA	0	0.0937188	0.114034	OeCa M	Oe	Ca	1	1
Anogam_AGAP007043-RB	-0.133045	0.0299103	0.114034	OeCa M	Oe	Ca	0.592447	0.725492
Anogam_AGAP007043-RA	0.133045	0.0199402	0.114034	OeCa M	Oe	Ca	0.407553	0.274508
Anogam_AGAP007044-RA	0	0.0912263	0.114034	OeCa M	Oe	Ca	1	1
Anogam_AGAP007046-RA	0	0.082505	0.114034	OeCa M	Oe	Ca	1	1
Anogam_AGAP007049-RA	0	0.0922233	0.114034	OeCa M	Oe	Ca	1	1
Anogam_AGAP007050-RA	0	0.104686	0.114034	OeCa M	Oe	Ca	1	1
Anogam_AGAP007051-RA	0	0.082505	0.114034	OeCa M	Oe	Ca	1	1
Anogam_AGAP007052-RA	0	0.0967099	0.114034	OeCa M	Oe	Ca	1	1
Anogam_AGAP007054-RA	0	0.0997009	0.114034	OeCa M	Oe	Ca	1	1
Anogam_AGAP007055-RA	0	0.0922233	0.114034	OeCa M	Oe	Ca	1	1
Anogam_AGAP007057-RA	0	0.082505	0.114034	OeCa M	Oe	Ca	1	1
Anogam_AGAP007058-RA	0	0.082505	0.114034	OeCa M	Oe	Ca	1	1
Anogam_AGAP007059-RA	0	0.082505	0.114034	OeCa M	Oe	Ca	1	1
Anogam_AGAP007060-RA	NA	NA	NA	OeCa M	Oe	Ca	NA	1
Anogam_AGAP007061-RA	NA	NA	NA	OeCa M	Oe	Ca	NA	NA
Anogam_AGAP007062-RA	0	0.106181	0.114034	OeCa M	Oe	Ca	1	1
Anogam_AGAP007063-RA	0	0.0927218	0.114034	OeCa M	Oe	Ca	1	1
Anogam_AGAP007065-RA	0	0.109671	0.114034	OeCa M	Oe	Ca	1	1
Anogam_AGAP007066-RA	0	0.0982054	0.114034	OeCa M	Oe	Ca	1	1
Anogam_AGAP007068-RA	0	0.0992024	0.114034	OeCa M	Oe	Ca	1	1
Anogam_AGAP007069-RA	0	0.0982054	0.114034	OeCa M	Oe	Ca	1	1
Anogam_AGAP007070-RA	NA	NA	NA	OeCa M	Oe	Ca	NA	NA
Anogam_AGAP007071-RA	NA	NA	NA	OeCa M	Oe	Ca	NA	NA
Anogam_AGAP007072-RA	NA	NA	NA	OeCa M	Oe	Ca	NA	NA
Anogam_AGAP007073-RA	NA	NA	NA	OeCa M	Oe	Ca	NA	NA
Anogam_AGAP007074-RA	NA	NA	NA	OeCa M	Oe	Ca	NA	NA
Anogam_AGAP007075-RA	0	0.107178	0.114034	OeCa M	Oe	Ca	1	1
Anogam_AGAP007078-RA	0	0.108674	0.114034	OeCa M	Oe	Ca	1	1
Anogam_AGAP007079-RA	0	0.102692	0.114034	OeCa M	Oe	Ca	1	1
Anogam_AGAP007080-RA	0	0.10319	0.114034	OeCa M	Oe	Ca	1	1
Anogam_AGAP007083-RA	0	0.0987039	0.114034	OeCa M	Oe	Ca	1	1
Anogam_AGAP007084-RA	-0.216275	0.0129611	0.114034	OeCa M	Oe	Ca	0	0.216275
Anogam_AGAP007084-RB	0.216275	0.0144566	0.114034	OeCa M	Oe	Ca	1	0.783725
Anogam_AGAP007087-RA	0	0.0917248	0.114034	OeCa M	Oe	Ca	1	1
Anogam_AGAP007088-RA	0	0.103689	0.114034	OeCa M	Oe	Ca	1	1
Anogam_AGAP007090-RA	NA	NA	NA	OeCa M	Oe	Ca	NA	1
Anogam_AGAP007093-RA	0	0.113659	0.11468	OeCa M	Oe	Ca	1	1
Anogam_AGAP007094-RA	0	0.0852443	0.114034	OeCa M	Oe	Ca	1	1
Anogam_AGAP007096-RA	0	0.0917248	0.114034	OeCa M	Oe	Ca	1	1
Anogam_AGAP007099-RA	NA	NA	NA	OeCa M	Oe	Ca	1	NA
Anogam_AGAP007104-RA	0	0.110169	0.114034	OeCa M	Oe	Ca	1	1
Anogam_AGAP007106-RA	0	0.0932203	0.114034	OeCa M	Oe	Ca	1	1
Anogam_AGAP007109-RA	0	0.0867398	0.114034	OeCa M	Oe	Ca	1	1
Anogam_AGAP007112-RA	0	0.104187	0.114034	OeCa M	Oe	Ca	1	1
Anogam_AGAP007114-RA	0	0.104187	0.114034	OeCa M	Oe	Ca	1	1
Anogam_AGAP007118-RA	0	0.0992024	0.114034	OeCa M	Oe	Ca	1	1
Anogam_AGAP007119-RA	0	0.0887338	0.114034	OeCa M	Oe	Ca	1	1
Anogam_AGAP007122-RA	0	0.0917248	0.114034	OeCa M	Oe	Ca	1	1
Anogam_AGAP007126-RA	0	0.082505	0.114034	OeCa M	Oe	Ca	1	1
Anogam_AGAP007127-RA	0	0.112164	0.114096	OeCa M	Oe	Ca	1	1
Anogam_AGAP007129-RA	0	0.110169	0.114034	OeCa M	Oe	Ca	1	1
Anogam_AGAP007130-RA	0	0.0947159	0.114034	OeCa M	Oe	Ca	1	1
Anogam_AGAP007135-RA	0	0.107178	0.114034	OeCa M	Oe	Ca	1	1
Anogam_AGAP007143-RA	0	0.0957129	0.114034	OeCa M	Oe	Ca	1	1
Anogam_AGAP007146-RA	0	0.0972084	0.114034	OeCa M	Oe	Ca	1	1
Anogam_AGAP007148-RA	0	0.10319	0.114034	OeCa M	Oe	Ca	1	1
Anogam_AGAP007150-RA	NA	NA	NA	OeCa M	Oe	Ca	NA	NA
Anogam_AGAP007151-RA	NA	NA	NA	OeCa M	Oe	Ca	NA	1
Anogam_AGAP007152-RA	0	0.115653	0.115972	OeCa M	Oe	Ca	1	1
Anogam_AGAP007153-RA	NA	NA	NA	OeCa M	Oe	Ca	NA	1
Anogam_AGAP007154-RA	0	0.106181	0.114034	OeCa M	Oe	Ca	1	1
Anogam_AGAP007156-RA	0	0.0967099	0.114034	OeCa M	Oe	Ca	1	1
Anogam_AGAP007157-RA	0	0.109671	0.114034	OeCa M	Oe	Ca	1	1
Anogam_AGAP007159-RA	0	0.108175	0.114034	OeCa M	Oe	Ca	1	1
Anogam_AGAP007160-RA	0.18997	0.0109671	0.114034	OeCa M	Oe	Ca	0.18997	0
Anogam_AGAP007160-RB	-0.0847402	0.0393819	0.114034	OeCa M	Oe	Ca	0.530925	0.615665
Anogam_AGAP007160-RC	-0.197893	0.0189432	0.114034	OeCa M	Oe	Ca	0.136378	0.334271
Anogam_AGAP007160-RD	0.0926634	0.0274177	0.114034	OeCa M	Oe	Ca	0.142727	0.0500638
Anogam_AGAP007162-RA	0.00708637	0.0772682	0.114034	OeCa M	Oe	Ca	0.0927943	0.0857079
Anogam_AGAP007162-RB	-0.00708637	0.0705765	0.114034	OeCa M	Oe	Ca	0.907206	0.914292
Anogam_AGAP007163-RB	-0.671565	0.000994036	0.114034	OeCa M	Oe	Ca	0.170579	0.842145
Anogam_AGAP007163-RA	0.671565	0.000997009	0.114034	OeCa M	Oe	Ca	0.829421	0.157855
Anogam_AGAP007165-RA	0	0.082505	0.114034	OeCa M	Oe	Ca	1	1
Anogam_AGAP007166-RA	0	0.0912263	0.114034	OeCa M	Oe	Ca	1	1
Anogam_AGAP007167-RA	0	0.100698	0.114034	OeCa M	Oe	Ca	1	1
Anogam_AGAP007168-RA	0	0.107677	0.114034	OeCa M	Oe	Ca	1	1
Anogam_AGAP007173-RA	0	0.105683	0.114034	OeCa M	Oe	Ca	1	1
Anogam_AGAP007176-RA	0	0.0922233	0.114034	OeCa M	Oe	Ca	1	1
Anogam_AGAP007181-RA	0.216388	0.0134596	0.114034	OeCa M	Oe	Ca	0.707684	0.491296
Anogam_AGAP007181-RB	-0.216388	0.0144566	0.114034	OeCa M	Oe	Ca	0.292316	0.508704
Anogam_AGAP007184-RA	0	0.107178	0.114034	OeCa M	Oe	Ca	1	1
Anogam_AGAP007185-RA	0	0.0912263	0.114034	OeCa M	Oe	Ca	1	1
Anogam_AGAP007186-RA	0	0.112164	0.114096	OeCa M	Oe	Ca	1	1
Anogam_AGAP007187-RA	NA	NA	NA	OeCa M	Oe	Ca	NA	NA
Anogam_AGAP007188-RA	NA	NA	NA	OeCa M	Oe	Ca	NA	NA
Anogam_AGAP007189-RA	NA	NA	NA	OeCa M	Oe	Ca	NA	NA
Anogam_AGAP007190-RA	NA	NA	NA	OeCa M	Oe	Ca	NA	NA
Anogam_AGAP007195-RA	0	0.104686	0.114034	OeCa M	Oe	Ca	1	1
Anogam_AGAP007196-RA	0	0.0947159	0.114034	OeCa M	Oe	Ca	1	1
Anogam_AGAP007197-RA	NA	NA	NA	OeCa M	Oe	Ca	NA	1
Anogam_AGAP007198-RB	0.0366771	0.0483549	0.114034	OeCa M	Oe	Ca	0.650711	0.614034
Anogam_AGAP007198-RA	-0.0366771	0.0633101	0.114034	OeCa M	Oe	Ca	0.349289	0.385966
Anogam_AGAP007199-RA	NA	NA	NA	OeCa M	Oe	Ca	NA	NA
Anogam_AGAP007200-RA	NA	NA	NA	OeCa M	Oe	Ca	1	NA
Anogam_AGAP007202-RA	0	0.0947159	0.114034	OeCa M	Oe	Ca	1	1
Anogam_AGAP007206-RA	0	0.102193	0.114034	OeCa M	Oe	Ca	1	1
Anogam_AGAP007208-RA	0	0.0882353	0.114034	OeCa M	Oe	Ca	1	1
Anogam_AGAP007209-RB	-0.00210849	0.0907278	0.114034	OeCa M	Oe	Ca	0.000782019	0.00289051
Anogam_AGAP007209-RD	0.085197	0.0368893	0.114034	OeCa M	Oe	Ca	0.806542	0.721345
Anogam_AGAP007209-RA	0.0443526	0.050349	0.114034	OeCa M	Oe	Ca	0.125833	0.0814806
Anogam_AGAP007209-RC	-0.000714218	0.0765408	0.114034	OeCa M	Oe	Ca	4.98492e-05	0.000764067
Anogam_AGAP007209-RE	-0.126727	0.0269192	0.114034	OeCa M	Oe	Ca	0.0667928	0.19352
Anogam_AGAP007210-RA	0	0.104187	0.114034	OeCa M	Oe	Ca	1	1
Anogam_AGAP007212-RA	0	0.0882353	0.114034	OeCa M	Oe	Ca	1	1
Anogam_AGAP007214-RA	0	0.0992024	0.114034	OeCa M	Oe	Ca	1	1
Anogam_AGAP007215-RA	0	0.082505	0.114034	OeCa M	Oe	Ca	1	1
Anogam_AGAP007216-RA	0	0.10668	0.114034	OeCa M	Oe	Ca	1	1
Anogam_AGAP007219-RA	0	0.103689	0.114034	OeCa M	Oe	Ca	1	1
Anogam_AGAP029058-RA	0	0.111665	0.114034	OeCa M	Oe	Ca	1	1
Anogam_AGAP007224-RA	NA	NA	NA	OeCa M	Oe	Ca	NA	NA
Anogam_AGAP007225-RA	NA	NA	NA	OeCa M	Oe	Ca	NA	1
Anogam_AGAP007226-RA	NA	NA	NA	OeCa M	Oe	Ca	NA	NA
Anogam_AGAP007227-RA	NA	NA	NA	OeCa M	Oe	Ca	NA	NA
Anogam_AGAP007228-RA	NA	NA	NA	OeCa M	Oe	Ca	NA	NA
Anogam_AGAP007229-RA	NA	NA	NA	OeCa M	Oe	Ca	NA	1
Anogam_AGAP007230-RA	NA	NA	NA	OeCa M	Oe	Ca	NA	1
Anogam_AGAP007231-RA	NA	NA	NA	OeCa M	Oe	Ca	NA	NA
Anogam_AGAP007232-RA	NA	NA	NA	OeCa M	Oe	Ca	NA	NA
Anogam_AGAP007234-RA	NA	NA	NA	OeCa M	Oe	Ca	NA	NA
Anogam_AGAP007235-RA	NA	NA	NA	OeCa M	Oe	Ca	NA	NA
Anogam_AGAP007236-RA	NA	NA	NA	OeCa M	Oe	Ca	NA	NA
Anogam_AGAP007238-RA	0	0.0992024	0.114034	OeCa M	Oe	Ca	1	1
Anogam_AGAP007240-RA	0	0.0947159	0.114034	OeCa M	Oe	Ca	1	1
Anogam_AGAP007242-RA	-0.155992	0.0218688	0.114034	OeCa M	Oe	Ca	0.704784	0.860776
Anogam_AGAP007242-RB	0.155992	0.0199402	0.114034	OeCa M	Oe	Ca	0.295216	0.139224
Anogam_AGAP007243-RA	0	0.0957129	0.114034	OeCa M	Oe	Ca	1	1
Anogam_AGAP007244-RA	0	0.0907278	0.114034	OeCa M	Oe	Ca	1	1
Anogam_AGAP007246-RA	0	0.100698	0.114034	OeCa M	Oe	Ca	1	1
Anogam_AGAP007249-RB	-0.502143	0.00299103	0.114034	OeCa M	Oe	Ca	0.333333	0.835476
Anogam_AGAP007249-RA	0.502143	0.00448654	0.114034	OeCa M	Oe	Ca	0.666667	0.164524
Anogam_AGAP007250-RB	0.140635	0.0209372	0.114034	OeCa M	Oe	Ca	0.140635	0
Anogam_AGAP007250-RA	-0.338972	0.00398804	0.114034	OeCa M	Oe	Ca	0.57627	0.915242
Anogam_AGAP007250-RC	0.198338	0.00847458	0.114034	OeCa M	Oe	Ca	0.283095	0.0847577
Anogam_AGAP007251-RA	0	0.0972084	0.114034	OeCa M	Oe	Ca	1	1
Anogam_AGAP007253-RB	0.104453	0.0353938	0.114034	OeCa M	Oe	Ca	0.879222	0.774769
Anogam_AGAP007253-RA	-0.104453	0.0309073	0.114034	OeCa M	Oe	Ca	0.120778	0.225231
Anogam_AGAP007254-RA	0	0.0937188	0.114034	OeCa M	Oe	Ca	1	1
Anogam_AGAP007257-RA	0	0.104686	0.114034	OeCa M	Oe	Ca	1	1
Anogam_AGAP007258-RA	0	0.0992024	0.114034	OeCa M	Oe	Ca	1	1
Anogam_AGAP007262-RA	0	0.0972084	0.114034	OeCa M	Oe	Ca	1	1
Anogam_AGAP007264-RA	0	0.107677	0.114034	OeCa M	Oe	Ca	1	1
Anogam_AGAP007266-RA	0	0.110668	0.114034	OeCa M	Oe	Ca	1	1
Anogam_AGAP007270-RA	NA	NA	NA	OeCa M	Oe	Ca	NA	NA
Anogam_AGAP007272-RA	NA	NA	NA	OeCa M	Oe	Ca	NA	NA
Anogam_AGAP007273-RA	NA	NA	NA	OeCa M	Oe	Ca	NA	NA
Anogam_AGAP007281-RA	0	0.0837488	0.114034	OeCa M	Oe	Ca	1	1
Anogam_AGAP007282-RA	0	0.0942173	0.114034	OeCa M	Oe	Ca	1	1
Anogam_AGAP007283-RA	0	0.104187	0.114034	OeCa M	Oe	Ca	1	1
Anogam_AGAP007284-RA	0	0.0927218	0.114034	OeCa M	Oe	Ca	1	1
Anogam_AGAP007286-RA	0	0.0912263	0.114034	OeCa M	Oe	Ca	1	1
Anogam_AGAP007289-RB	0	0.0982054	0.114034	OeCa M	Oe	Ca	1	1
Anogam_AGAP007290-RA	0	0.0827517	0.114034	OeCa M	Oe	Ca	1	1
Anogam_AGAP007291-RA	0	0.108674	0.114034	OeCa M	Oe	Ca	1	1
Anogam_AGAP007292-RA	0	0.0852443	0.114034	OeCa M	Oe	Ca	1	1
Anogam_AGAP007293-RA	0	0.115653	0.115972	OeCa M	Oe	Ca	1	1
Anogam_AGAP007294-RA	0	0.113659	0.11468	OeCa M	Oe	Ca	1	1
Anogam_AGAP007295-RA	0	0.082505	0.114034	OeCa M	Oe	Ca	1	1
Anogam_AGAP007297-RA	0	0.0967099	0.114034	OeCa M	Oe	Ca	1	1
Anogam_AGAP007299-RA	0	0.105683	0.114034	OeCa M	Oe	Ca	1	1
Anogam_AGAP007300-RA	0	0.107677	0.114034	OeCa M	Oe	Ca	1	1
Anogam_AGAP007302-RA	0	0.111167	0.114034	OeCa M	Oe	Ca	1	1
Anogam_AGAP007303-RA	0	0.0987039	0.114034	OeCa M	Oe	Ca	1	1
Anogam_AGAP007304-RA	0	0.102692	0.114034	OeCa M	Oe	Ca	1	1
Anogam_AGAP007305-RA	0	0.0892323	0.114034	OeCa M	Oe	Ca	1	1
Anogam_AGAP007306-RA	0	0.082505	0.114034	OeCa M	Oe	Ca	1	1
Anogam_AGAP007308-RA	0	0.0912263	0.114034	OeCa M	Oe	Ca	1	1
Anogam_AGAP007313-RA	0	0.107677	0.114034	OeCa M	Oe	Ca	1	1
Anogam_AGAP007317-RA	0	0.101196	0.114034	OeCa M	Oe	Ca	1	1
Anogam_AGAP007318-RA	0	0.0977069	0.114034	OeCa M	Oe	Ca	1	1
Anogam_AGAP007319-RA	0	0.0887338	0.114034	OeCa M	Oe	Ca	1	1
Anogam_AGAP007320-RA	0	0.0982054	0.114034	OeCa M	Oe	Ca	1	1
Anogam_AGAP007321-RA	0	0.082505	0.114034	OeCa M	Oe	Ca	1	1
Anogam_AGAP007322-RA	0	0.082505	0.114034	OeCa M	Oe	Ca	1	1
Anogam_AGAP007323-RA	0	0.0992024	0.114034	OeCa M	Oe	Ca	1	1
Anogam_AGAP007325-RA	-0.128202	0.026839	0.114034	OeCa M	Oe	Ca	0.42391	0.552112
Anogam_AGAP007325-RB	0.128202	0.0264207	0.114034	OeCa M	Oe	Ca	0.57609	0.447888
Anogam_AGAP007326-RA	0.22715	0.0159521	0.114034	OeCa M	Oe	Ca	0.333333	0.106183
Anogam_AGAP007326-RB	-0.22715	0.0129611	0.114034	OeCa M	Oe	Ca	0.666667	0.893817
Anogam_AGAP007335-RA	0	0.0947159	0.114034	OeCa M	Oe	Ca	1	1
Anogam_AGAP007337-RA	0	0.0922233	0.114034	OeCa M	Oe	Ca	1	1
Anogam_AGAP007339-RA	0	0.0972084	0.114034	OeCa M	Oe	Ca	1	1
Anogam_AGAP028466-RA	0	0.0917248	0.114034	OeCa M	Oe	Ca	1	1
Anogam_AGAP007342-RA	0	0.110668	0.114034	OeCa M	Oe	Ca	1	1
Anogam_AGAP007343-RA	0	0.0992024	0.114034	OeCa M	Oe	Ca	1	1
Anogam_AGAP007344-RA	0	0.0932203	0.114034	OeCa M	Oe	Ca	1	1
Anogam_AGAP007345-RA	0	0.10668	0.114034	OeCa M	Oe	Ca	1	1
Anogam_AGAP007346-RA	0	0.100199	0.114034	OeCa M	Oe	Ca	1	1
Anogam_AGAP007347-RA	0	0.0982054	0.114034	OeCa M	Oe	Ca	1	1
Anogam_AGAP007349-RA	0	0.101196	0.114034	OeCa M	Oe	Ca	1	1
Anogam_AGAP007353-RA	NA	NA	NA	OeCa M	Oe	Ca	NA	1
Anogam_AGAP007359-RA	0	0.104187	0.114034	OeCa M	Oe	Ca	1	1
Anogam_AGAP007362-RA	0.106844	0.0259222	0.114034	OeCa M	Oe	Ca	0.271839	0.164995
Anogam_AGAP007362-RB	-0.106844	0.0298211	0.114034	OeCa M	Oe	Ca	0.728161	0.835005
Anogam_AGAP007366-RB	0.141753	0.0219342	0.114034	OeCa M	Oe	Ca	0.437174	0.295421
Anogam_AGAP007366-RA	-0.141753	0.0239282	0.114034	OeCa M	Oe	Ca	0.562826	0.704579
Anogam_AGAP007368-RA	0	0.0812562	0.114034	OeCa M	Oe	Ca	1	1
Anogam_AGAP007369-RA	0	0.100199	0.114034	OeCa M	Oe	Ca	1	1
Anogam_AGAP007373-RB	-0.0604118	0.0468594	0.114034	OeCa M	Oe	Ca	0.0870894	0.147501
Anogam_AGAP007373-RA	0.0604118	0.0448654	0.114034	OeCa M	Oe	Ca	0.912911	0.852499
Anogam_AGAP007374-RA	0	0.082505	0.114034	OeCa M	Oe	Ca	1	1
Anogam_AGAP007375-RA	0	0.113659	0.11468	OeCa M	Oe	Ca	1	1
Anogam_AGAP007377-RA	0	0.103689	0.114034	OeCa M	Oe	Ca	1	1
Anogam_AGAP007379-RA	0	0.0997009	0.114034	OeCa M	Oe	Ca	1	1
Anogam_AGAP007380-RA	0	0.0957129	0.114034	OeCa M	Oe	Ca	1	1
Anogam_AGAP007381-RA	0	0.104187	0.114034	OeCa M	Oe	Ca	1	1
Anogam_AGAP007384-RA	0	0.0887338	0.114034	OeCa M	Oe	Ca	1	1
Anogam_AGAP007387-RA	0	0.0962114	0.114034	OeCa M	Oe	Ca	1	1
Anogam_AGAP007388-RA	0	0.0882353	0.114034	OeCa M	Oe	Ca	1	1
Anogam_AGAP007390-RA	0	0.10319	0.114034	OeCa M	Oe	Ca	1	1
Anogam_AGAP007392-RA	0	0.0897308	0.114034	OeCa M	Oe	Ca	1	1
Anogam_AGAP007394-RA	0	0.100199	0.114034	OeCa M	Oe	Ca	1	1
Anogam_AGAP007397-RA	0	0.104686	0.114034	OeCa M	Oe	Ca	1	1
Anogam_AGAP007398-RA	0	0.101196	0.114034	OeCa M	Oe	Ca	1	1
Anogam_AGAP007400-RA	0	0.100698	0.114034	OeCa M	Oe	Ca	1	1
Anogam_AGAP007401-RA	0.0281903	0.0526839	0.114034	OeCa M	Oe	Ca	0.307205	0.279015
Anogam_AGAP007401-RB	-0.0281903	0.0526839	0.114034	OeCa M	Oe	Ca	0.692795	0.720985
Anogam_AGAP007402-RA	0	0.102193	0.114034	OeCa M	Oe	Ca	1	1
Anogam_AGAP007405-RA	NA	NA	NA	OeCa M	Oe	Ca	NA	NA
Anogam_AGAP007413-RA	0	0.0857428	0.114034	OeCa M	Oe	Ca	1	1
Anogam_AGAP007414-RA	0	0.105683	0.114034	OeCa M	Oe	Ca	1	1
Anogam_AGAP007418-RA	0	0.0872383	0.114034	OeCa M	Oe	Ca	1	1
Anogam_AGAP007422-RA	0	0.0962114	0.114034	OeCa M	Oe	Ca	1	1
Anogam_AGAP007422-RB	0	0.0967099	0.114034	OeCa M	Oe	Ca	0	0
Anogam_AGAP007440-RA	0	0.082505	0.114034	OeCa M	Oe	Ca	1	1
Anogam_AGAP007443-RA	0	0.082505	0.114034	OeCa M	Oe	Ca	1	1
Anogam_AGAP007450-RA	0	0.082505	0.114034	OeCa M	Oe	Ca	1	1
Anogam_AGAP007452-RB	0.221125	0.0119284	0.114034	OeCa M	Oe	Ca	0.901267	0.680142
Anogam_AGAP007452-RA	-0.221125	0.0119284	0.114034	OeCa M	Oe	Ca	0.0987332	0.319858
Anogam_AGAP007454-RA	0	0.0917248	0.114034	OeCa M	Oe	Ca	1	1
Anogam_AGAP007457-RA	0	0.0877368	0.114034	OeCa M	Oe	Ca	1	1
Anogam_AGAP007461-RA	0	0.105184	0.114034	OeCa M	Oe	Ca	1	1
Anogam_AGAP007473-RA	0	0.0887338	0.114034	OeCa M	Oe	Ca	1	1
Anogam_AGAP007474-RA	0	0.0867398	0.114034	OeCa M	Oe	Ca	1	1
Anogam_AGAP028762-RA	0	0.082505	0.114034	OeCa M	Oe	Ca	1	1
Anogam_AGAP007476-RA	0	0.100199	0.114034	OeCa M	Oe	Ca	1	1
Anogam_AGAP007477-RA	0	0.110169	0.114034	OeCa M	Oe	Ca	1	1
Anogam_AGAP007479-RA	0	0.106181	0.114034	OeCa M	Oe	Ca	1	1
Anogam_AGAP007483-RA	0	0.109671	0.114034	OeCa M	Oe	Ca	1	1
Anogam_AGAP007487-RA	0	0.0987039	0.114034	OeCa M	Oe	Ca	1	1
Anogam_AGAP007489-RA	-0.0475468	0.0483549	0.114034	OeCa M	Oe	Ca	0.481545	0.529092
Anogam_AGAP007489-RB	0.0475468	0.0463609	0.114034	OeCa M	Oe	Ca	0.518455	0.470908
Anogam_AGAP007490-RA	0	0.0967099	0.114034	OeCa M	Oe	Ca	1	1
Anogam_AGAP007492-RA	0	0.0917248	0.114034	OeCa M	Oe	Ca	1	1
Anogam_AGAP007497-RA	0	0.100199	0.114034	OeCa M	Oe	Ca	1	1
Anogam_AGAP007499-RA	0	0.109671	0.114034	OeCa M	Oe	Ca	1	1
Anogam_AGAP007502-RA	0	0.082505	0.114034	OeCa M	Oe	Ca	1	1
Anogam_AGAP007504-RA	0	0.082505	0.114034	OeCa M	Oe	Ca	1	1
Anogam_AGAP007506-RA	0	0.0942173	0.114034	OeCa M	Oe	Ca	1	1
Anogam_AGAP007508-RA	0	0.101695	0.114034	OeCa M	Oe	Ca	1	1
Anogam_AGAP007510-RA	0	0.0972084	0.114034	OeCa M	Oe	Ca	1	1
Anogam_AGAP007513-RA	0	0.105683	0.114034	OeCa M	Oe	Ca	1	1
Anogam_AGAP007514-RA	0	0.082505	0.114034	OeCa M	Oe	Ca	1	1
Anogam_AGAP007515-RA	0	0.082505	0.114034	OeCa M	Oe	Ca	1	1
Anogam_AGAP007516-RA	0	0.082505	0.114034	OeCa M	Oe	Ca	1	1
Anogam_AGAP007517-RA	0	0.0972084	0.114034	OeCa M	Oe	Ca	1	1
Anogam_AGAP007518-RA	0	0.107677	0.114034	OeCa M	Oe	Ca	1	1
Anogam_AGAP007519-RA	0	0.082505	0.114034	OeCa M	Oe	Ca	1	1
Anogam_AGAP007521-RA	0	0.110169	0.114034	OeCa M	Oe	Ca	1	1
Anogam_AGAP007521-RB	0	0.101695	0.114034	OeCa M	Oe	Ca	0	0
Anogam_AGAP007524-RA	0	0.0882353	0.114034	OeCa M	Oe	Ca	1	1
Anogam_AGAP007529-RA	0	0.082505	0.114034	OeCa M	Oe	Ca	1	1
Anogam_AGAP007530-RA	0	0.0997009	0.114034	OeCa M	Oe	Ca	1	1
Anogam_AGAP007532-RA	0	0.109172	0.114034	OeCa M	Oe	Ca	1	1
Anogam_AGAP013228-RA	0	0.112164	0.114096	OeCa M	Oe	Ca	1	1
Anogam_AGAP007534-RC	-0.296976	0.00695825	0.114034	OeCa M	Oe	Ca	0.287093	0.584068
Anogam_AGAP007534-RA	0.0511829	0.0473579	0.114034	OeCa M	Oe	Ca	0.265578	0.214395
Anogam_AGAP007534-RB	0.245793	0.00897308	0.114034	OeCa M	Oe	Ca	0.447329	0.201537
Anogam_AGAP007540-RA	0	0.0977069	0.114034	OeCa M	Oe	Ca	1	1
Anogam_AGAP007541-RA	0	0.0922233	0.114034	OeCa M	Oe	Ca	1	1
Anogam_AGAP007542-RA	0	0.0832502	0.114034	OeCa M	Oe	Ca	1	1
Anogam_AGAP007547-RA	0	0.114656	0.115265	OeCa M	Oe	Ca	1	1
Anogam_AGAP007548-RA	-0.177791	0.0134596	0.114034	OeCa M	Oe	Ca	0.36399	0.54178
Anogam_AGAP007548-RB	0.177791	0.0184447	0.114034	OeCa M	Oe	Ca	0.63601	0.45822
Anogam_AGAP007551-RA	0	0.10319	0.114034	OeCa M	Oe	Ca	1	1
Anogam_AGAP007556-RA	0	0.102193	0.114034	OeCa M	Oe	Ca	1	1
Anogam_AGAP007557-RA	0	0.0967099	0.114034	OeCa M	Oe	Ca	1	1
Anogam_AGAP007559-RA	0	0.10319	0.114034	OeCa M	Oe	Ca	1	1
Anogam_AGAP007566-RA	NA	NA	NA	OeCa M	Oe	Ca	NA	NA
Anogam_AGAP007568-RA	0	0.0887338	0.114034	OeCa M	Oe	Ca	1	1
Anogam_AGAP007570-RA	0	0.082505	0.114034	OeCa M	Oe	Ca	1	1
Anogam_AGAP007573-RA	0	0.0932203	0.114034	OeCa M	Oe	Ca	1	1
Anogam_AGAP007575-RA	0	0.082505	0.114034	OeCa M	Oe	Ca	1	1
Anogam_AGAP007577-RA	0	0.082505	0.114034	OeCa M	Oe	Ca	1	1
[truncated: 13,664 more rows]

## Sheet: Sheet 4
isoform	dPSI	pval	pval.corr	comparison	group.i	group.j	PSI.i	PSI.j
[truncated: 15,349 more rows]
