# Supplementary material for: Isolation and transcriptomic analysis of Anopheles gambiae oenocytes enables the delineation of hydrocarbon biosynthesis
Source: eLife. 2020 Jun 15;9:e58019. doi: 10.7554/eLife.58019 (PMC7351493; doi:10.7554/eLife.58019)
Supplement: Figure 5—source data 1. — The CHC peaks identified in each sample are shown as well as their amount (ngr) (in 2 μl of hexane extract) normalised to the internal standard. A summary of the total ngr of CHCs/mgr is provided for all samples. In the last sheet the FAS1899i females and control females are used to show the relative abundance (in % to the total) of each CHC peak. [file elife-58019-fig5-data1.xlsx]

## Sheet: FAS1899 Females
amount (ngr) of each CHC peak normalized to the internal standard
	FAS1899i Female 1	FAS1899i Female 2	FAS1899i Female 3	FAS1899i Female 4	FAS1899i Female 5	Control Female 1	Control Female 2	Control Female 3	Control Female 4	Control Female 5
C19	0.0559958	0.032099	0.0341352	0.0308454	0.0409925	0.0376098	0.0348619	0.0321302	0.028782	0.0228082
C20	0.0271833	0.0168445	0.00842032	0.0121326	0.0132189	0.0119408	0.0113527	0.0103674	0.00856691	0.00637312
C21	0.111561	0.0848819	0.0591453	0.054579	0.0601899	0.101103	0.0774777	0.0756435	0.0737307	0.0613067
C22	0.015791	0.0156811	0.0103671	0.00349683	0.00236743	0.00981614	0.00972026	0.0103674	0.0106534	0.0106854
C23:1	0.00182696	0.00360677	0.00677209	0.00444192	0.00235822	0.00287028	0.00204051	0.00428568	0.002197	0.00192233
C23	0.100867	0.0718769	0.0560519	0.0606039	0.100878	0.105904	0.0839208	0.0868407	0.0837484	0.0640603
C24	0.117298	0.0886568	0.0900079	0.105129	0.150585	0.135618	0.119784	0.114301	0.118044	0.089241
C25:1	0.00368883	0.00424022	0.00242458	0.00279983	0.00316886	0.0021859	0.00584947	0.00284886	0.00223845	0.00252847
C25	0.256601	0.299814	0.204835	0.242794	0.408515	0.260245	0.201912	0.237719	0.251605	0.151933
methyl- C25	0.0184907	0.0175038	0.0103313	0.00890748	0.0164523	0.0127783	0.0103881	0.0149875	0.0134031	0.00786249
C26	0.14952	0.130865	0.105821	0.126016	0.221848	0.143994	0.124212	0.142616	0.150432	0.086193
C27:1	0.012556	0.0163921	0.023338	0.0133258	0.0245586	0.00740552	0.00583711	0.0133401	0.008484	0.00571503
C27	1.95172	1.85839	1.54343	1.75756	2.55006	2.4408	2.17678	2.4553	2.56647	1.95284
methyl- C27	0.0344679	0.0409155	0.0315434	0.0327828	0.060761	0.0815628	0.0579629	0.0756682	0.0870094	0.0573927
methyl- C27	0.025752	0.0153966	0.0213793	0.0134203	0.0395923	0.0386415	0.0401054	0.0401689	0.0321535	0.0183054
C28	0.321301	0.306252	0.257351	0.299546	0.565282	0.520031	0.427518	0.491565	0.449625	0.273646
methyl-C28	0.0270321	0.0220931	0.0181425	0.0302547	0.0603096	0.03619	0.0463135	0.055912	0.0420055	0.0358661
C29:1	0.310653	0.325049	0.307611	0.327911	0.537656	0.239826	0.163068	0.267149	0.244737	0.158982
C29	2.72291	3.08338	2.62505	2.72895	3.37702	3.62767	3.75511	4.06354	3.97717	3.50676
methyl-C29	0.593251	0.523938	0.41545	0.72896	1.29273	1.46073	1.18635	1.66396	1.38408	1.06663
C30	0.244057	0.221099	0.184327	0.213531	0.440609	0.441154	0.392731	0.404724	0.34345	0.258925
methyl-C30	0.179729	0.190862	0.139049	0.22323	0.393003	0.481982	0.367231	0.567493	0.414113	0.329844
C31:1	0.414162	0.391781	0.357344	0.444405	0.727547	0.372257	0.238023	0.419018	0.369717	0.229242
C31	1.27694	1.23642	1.03421	1.2526	1.89921	2.09169	2.01924	1.89932	2.01879	1.35512
methyl-C31	2.03834	1.94936	1.62831	2.44426	3.3408	3.81747	3.65256	4.36182	3.92917	3.38804
dimethyl-C31	0.182557	0.156552	0.125433	0.141917	0.403421	0.478519	0.36383	0.481383	0.427516	0.391064
C32	0.0572991	0.051891	0.0272795	0.0466638	0.0828693	0.070572	0.0834137	0.0722868	0.0844255	0.0499978
methyl-C32	0.144819	0.117239	0.0910948	0.146253	0.26787	0.301767	0.266775	0.353209	0.24663	0.221951
dimethyl-C32	0.0477687	0.04672	0.0241621	0.0268169	0.10659	0.0416343	0.0222972	0.0524562	0.0349723	0.0204009
C-33	0.139245	0.0976802	0.0700619	0.0966591	0.180008	0.21522	0.17358	0.141836	0.197412	0.0990605
methyl-C33	0.724885	0.653045	0.5102	0.77651	1.40357	1.54783	1.47355	1.6284	1.25708	1.07463
dimethyl-C33	0.45553	0.371976	0.304338	0.565731	1.01414	0.87478	0.726806	1.17212	0.797994	0.682201
methyl-C34	0.0303369	0.0285568	0.0275064	0.0288016	0.0655419	0.0561083	0.0443101	0.0652761	0.0451697	0.0413733
dimethyl-C34	0.0321057	0.0296557	0.0316031	0.0382643	0.0703597	0.0501736	0.0305582	0.0776624	0.0493841	0.0467074
methyl-C35	0.128679	0.123096	0.0887538	0.115585	0.253251	0.271032	0.245999	0.24551	0.16436	0.151673
dimethyl-C35	0.4005	0.385033	0.294377	0.46287	0.76281	0.736364	0.679862	0.865831	0.601397	0.571589
methyl-C36	0.0202944	0.0178787	0.00973413	0.01876	0.0195751	0.0175689	0.0100047	0.0137736	0.0142459	0.0104256
dimethyl-C36	0.0127189	0.0119062	0.00537467	0.0139637	0.0272853	0.0300204	0.0175237	0.0270766	0.0146881	0.0238819
methyl-C37	0.0234829	0.0244976	0.0155746	0.0168935	0.0397673	0.0387947	0.0341446	0.0315357	0.0214035	0.0228947
dimethyl-C37	0.129482	0.124699	0.0792944	0.110824	0.223358	0.204321	0.209072	0.223165	0.197329	0.204858
methyl-C38	0.0100657	0.0049383	0.00259179	0.00342595	0.00203581	0.00680286	0.00373476	0.00562341	0.0044769	0.00640776
dimethyl-C38	0.035585	0.0208003	0.0189547	0.019965	0.0362576	0.028907	0.0553041	0.0577328	0.0387307	0.0422046
methyl-C39	0.0254495	0.0182278	0.0237441	0.0132903	0.0381552	0.0486517	0.0475749	0.040652	0.027041	0.0370957
dimethyl-C39	0.416152	0.461951	0.28825	0.369814	0.895653	0.920317	1.0221	1.08772	0.852698	1.02335
methyl-C40	0.0162681	0.0139617	0.00925638	0.00912012	0.0140848	0.00700715	0.00897826	0.0100082	0.00605211	0.0116206
dimethyl-C40	0.0452202	0.0523693	0.0384827	0.0504678	0.103218	0.103064	0.0888304	0.139309	0.0828779	0.1001
methylC41	0.0443358	0.0568034	0.0385543	0.0480578	0.129297	0.104086	0.109124	0.106869	0.0642794	0.073897
dimethyl-C41	0.576843	0.729886	0.496429	0.650328	1.40316	1.45322	1.74366	2.01709	1.47772	1.71439
methyl-C42	0.0134055	0.0261653	0.0134128	0.0157121	0.0197409	0.0181818	0.0231258	0.0218867	0.0140663	0.0164697
dimethyl-C42	0.0812475	0.0607075	0.0492081	0.0499008	0.114705	0.0932482	0.117113	0.151287	0.0916659	0.104014
methyl-C43	0.0604759	0.0587167	0.0455175	0.0524407	0.159078	0.0952298	0.105365	0.0985458	0.0568456	0.0623458
dimethyl-C43	0.729377	0.96964	0.56206	0.694759	1.50123	1.54413	1.62952	2.0513	1.42361	1.57442
methyl-C44	0.0240065	0.0195981	0.0122423	0.00903743	0.0269445	0.0310419	0.0209864	0.0216885	0.0098934	0.0174395
dimethyl-C44	0.068866	0.0841192	0.053066	0.0555949	0.119136	0.150368	0.123989	0.131481	0.0822285	0.08886
methyl-C45	0.0394601	0.0519168	0.0296921	0.0374138	0.0999295	0.0411645	0.0526947	0.0551317	0.0411902	0.0430705
dimethyl-C45	0.550497	0.646103	0.453957	0.531105	1.33686	1.10644	0.987881	1.43098	0.875275	0.839901
methyl-C46	0.0222726	0.00809261	0.0102238	0.0064975	0.0106028	0.00822268	0.00748188	0.00800159	0.0104876	0.00763736
dimethyl-C46	0.0330017	0.0342191	0.0293816	0.0153459	0.0767711	0.0352911	0.0418985	0.0445661	0.0262949	0.0359354
methyl-C47	0.0232036	0.0367787	0.0366911	0.0167517	0.0173827	0.0575894	0.0158418	0.0329973	0.0159593	0.026064
dimethyl-C47	0.140024	0.204448	0.106442	0.1293	0.32653	0.158223	0.209233	0.230683	0.185612	0.153509
Sum of ngr	16.4972	16.7473	13.1978	16.5473	27.6809	27.4273	26.0065	30.7062	26.1514	22.7337
mgr	5	5.9	4.2	4.2	5.3	6.1	5.2	5.8	4.7	5.2
Summary
	FAS1899i Female 1	FAS1899i Female 2	FAS1899i Female 3	FAS1899i Female 4	FAS1899i Female 5	Control Female 1	Control Female 2	Control Female 3	Control Female 4	Control Female 5
Total CHC ngr in 2ul	16.4972	16.7473	13.1978	16.5473	27.6809	27.4273	26.0065	30.7062	26.1514	22.7337
Total CHC ngr in 200ul	1649.72	1674.73	1319.78	1654.73	2768.09	2742.73	2600.65	3070.62	2615.14	2273.37
ngr/mgr	329.943	283.852	314.233	393.984	522.281	449.629	500.125	529.417	556.413	437.186
	mean FAS1899i Female	mean Control Female	p-value
ngr/mgr	368.859	494.554	0.03
5 biological replicates,number of individuals per sample =3

## Sheet: FAS1899 Males
amount (ngr) of each CHC peak normalized to the internal standard
	FAS1899i Male 1	FAS1899i Male 2	FAS1899i Male 3	Control Male 1	Control Male 2	Control Male 3
C19	0.0154474	0.0136695	0.0116223	0.0117691	0.00816651	0.00901257
C20	0.00681055	0.00606896	0.00395252	0.00555069	0.00422503	0.00357751
C21	0.0220106	0.0254437	0.0196215	0.0169442	0.0168151	0.0190571
C22	0.00818027	0.008979	0.00839911	0.0059263	0.00638008	0.0040247
C23:1	0.00136972	0.000784944	0.000211742	0.000563416	0.000368627	0.000619184
C23	0.0428418	0.046216	0.0410545	0.0300488	0.0227698	0.023701
C24	0.111423	0.110773	0.105706	0.095718	0.0702376	0.0691423
C25:1	0.00106534	0.00315892	0.0027056	0.00131464	0.000340271	0.000343991
C25	0.268865	0.244635	0.185722	0.148804	0.0980264	0.0884058
methyl- C25	0.00563107	0.00756227	0.00562293	0.0046534	0.00564283	0.00567586
C26	0.0956711	0.0891008	0.125046	0.081257	0.0555776	0.0509795
C27:1	0.00536474	0.00721766	0.00388194	0.00175285	0.00124766	0
C27	1.90971	1.96502	1.59195	1.8705	1.3329	1.18343
methyl- C27	0.0220487	0.0321061	0.0197626	0.0255624	0.0136108	0.014826
methyl- C27	0.0121753	0.0112764	0.0105165	0.00525855	0.0137526	0.0117989
C28	0.264242	0.297628	0.332529	0.298402	0.193104	0.179254
methyl-C28	0.0124416	0.0121954	0.00809326	0.0208672	0.016333	0.0133813
C29:1	0.0942443	0.0922214	0.0554059	0.0267309	0.0201327	0.0169244
C29	3.00653	3.56225	3.46655	3.74173	3.41547	3.59265
methyl-C29	0.339234	0.514234	0.313661	0.656984	0.480037	0.410313
C30	0.256385	0.342331	0.39177	0.363695	0.24922	0.252902
methyl-C30	0.160866	0.219038	0.139491	0.258378	0.192622	0.159406
C31:1	0.203118	0.25436	0.154242	0.0579692	0.053139	0.0489844
C31	1.37828	1.77413	1.84108	2.08232	1.36259	1.53062
methyl-C31	2.01914	2.73792	1.96417	3.21706	2.71244	2.51912
dimethyl-C31	0.201634	0.339345	0.236916	0.491486	0.394261	0.344542
C32	0.0658417	0.080026	0.133445	0.0964275	0.0601429	0.0773637
methyl-C32	0.145304	0.215821	0.108389	0.241163	0.171213	0.155553
dimethyl-C32	0.0569956	0.0668926	0.0523239	0.074183	0.05019	0.038355
C-33	0.148063	0.217181	0.249527	0.287884	0.153434	0.177981
methyl-C33	0.7554	1.11029	0.704231	1.13964	0.960132	0.93631
dimethyl-C33	0.393072	0.664714	0.466727	0.98942	0.767368	0.639583
C-34	0.145951	0.169471	0.173299	0.18311	0.146572	0.142137
methyl-C34	0.0352132	0.0552716	0.0393841	0.0622887	0.0484319	0.0449253
dimethyl-C34	0.0380668	0.0673521	0.0545825	0.0860774	0.0743492	0.0515987
C-35	0.00545985	0.00495855	0.01094	0.0107884	0.0036012	0.00835899
methyl-C35	0.123294	0.186128	0.119376	0.187513	0.150598	0.160988
dimethyl-C35	0.465457	0.757548	0.553753	0.892137	0.758805	0.693659
methyl-C36	0.0179395	0.0354374	0.0220447	0.0314678	0.0291782	0.0340895
dimethyl-C36	0.00540278	0.00911301	0.00806973	0.00861817	0.00567118	0.0104573
methyl-C37	0.0221058	0.0333123	0.0318084	0.0367472	0.0313333	0.0409006
dimethyl-C37	0.123332	0.205119	0.179652	0.234527	0.283588	0.303022
methyl-C38	0.00816125	0.014397	0.0103754	0.0146279	0.0160495	0.0179907
dimethyl-C38	0.0300577	0.0476902	0.0364432	0.0514169	0.0788011	0.0750933
methyl-C39	0.0240652	0.0496621	0.0391017	0.0650641	0.072024	0.0714814
dimethyl-C39	0.441278	0.783489	0.688939	1.08495	1.4962	1.60231
methyl-C40	0.010368	0.0182643	0.0194332	0.0247068	0.0312482	0.0273473
dimethyl-C40	0.0618466	0.105144	0.0982955	0.171654	0.219021	0.238764
methylC41	0.0693611	0.15249	0.120693	0.143629	0.165882	0.219707
dimethyl-C41	0.988272	1.81452	1.58289	2.48201	3.09624	3.26124
methyl-C42	0.0154664	0.0341164	0.0303733	0.0357456	0.0357568	0.0408318
dimethyl-C42	0.0832295	0.145808	0.128316	0.220212	0.238729	0.252558
methyl-C43	0.0792725	0.178718	0.126669	0.135783	0.182527	0.197417
dimethyl-C43	1.40069	2.95625	2.43645	3.10626	3.57872	3.59268
methyl-C44	0.0205648	0.0243907	0.0385841	0.0366429	0.0438383	0.0486404
dimethyl-C44	0.0903444	0.175866	0.148125	0.214056	0.244655	0.277567
methyl-C45	0.0274515	0.0599812	0.0435954	0.0342223	0.0469007	0.06498
dimethyl-C45	0.964644	2.19756	1.68726	2.21554	2.28214	2.37361
methyl-C46	0.0128411	0.00993625	0.0137397	0.0146905	0.00881869	0.0129341
dimethyl-C46	0.0480353	0.0756418	0.0814267	0.105213	0.0897749	0.124009
methyl-C47	0.0632164	0.0782073	0.0726982	0.0507074	0.0922985	0.143788
dimethyl-C47	0.152629	0.400111	0.348387	0.490839	0.484886	0.475155
Sum of ngr	17.6034	25.9186	21.699	28.7812	26.9385	27.1861
mgr	5.6	5.5	5.3	5.5	5	5.3
Summary
	FAS1899i Male 1	FAS1899i Male 2	FAS1899i Male 3	Control Male 1	Control Male 2	Control Male 3
ngr in 2ul	17.6034	25.9186	21.699	28.7812	26.9385	27.1861
ngr in 200ul	1760.34	2591.86	2169.9	2878.12	2693.85	2718.61
ngr/mgr	314.347	471.246	409.415	523.295	538.77	512.945
	mean FAS1899i Male	mean Control Male	p-value
ngr/mgr	398.336	525.003	0.05
3 biological replicates,number of individuals per sample =5

## Sheet: Desat3050 Females
amount (ngr) of each CHC peak normalized to the internal standard
	Control Female 1	Control Female 2	Control Female 3	Control Female 4	Desat3050i Female 1	Desat3050i Female 2	Desat3050i Female 3	Desat3050i Female 4
C19	0.0340714	0.0394134	0.0413128	0.0377158	0.0323384	0.025984	0.0229299	0.0255133
C20	0.0173014	0.0181485	0.0321835	0.0215439	0.0175832	0.0160792	0.01543	0.0171031
C21	0.244759	0.293064	0.145201	0.271565	0.185423	0.168382	0.124485	0.175059
C22	0.0270446	0.0299419	0.0295256	0.0284827	0.0263134	0.0264343	0.0244052	0.0293297
C23:1	0.0046649	0.00427742	0.0171029	0.00436474	0.00430359	0.00591716	0.00430319	0.00473515
C23	0.142663	0.171219	0.330791	0.159593	0.121792	0.122009	0.101186	0.115834
C24	0.0283437	0.0306752	0.0355348	0.0286506	0.0284037	0.030036	0.0248356	0.0281282
C25:1	0.0104517	0.0144821	0.0171607	0.0122548	0.00965233	0.016851	0.00915965	0.0132867
C25	0.294774	0.364314	0.330791	0.265018	0.244198	0.295022	0.259851	0.301495
methyl- C25	0.032359	0.0331806	0.0355348	0.0301055	0.0293259	0.0302933	0.02502	0.0320859
C26	0.118748	0.119218	0.1088	0.10162	0.0818911	0.0795601	0.074937	0.081275
C27:1	0.0262179	0.0413077	0.0333969	0.0278112	0.0260674	0.0342809	0.026188	0.026432
C27	2.70788	2.43068	2.53221	2.52058	1.578	1.15153	1.55339	1.31743
methyl- C27	0.0420431	0.0523679	0.0483042	0.0432556	0.0302481	0.0311937	0.0258191	0.029047
methyl- C27	0.040744	0.049007	0.0479575	0.0337428	0.0220098	0.0232184	0.0255118	0.0281989
C28	0.192442	0.160587	0.167562	0.172295	0.134395	0.12574	0.155898	0.142479
methyl-C28	0.023974	0.0353193	0.0202808	0.0263563	0.0186899	0.0201312	0.0183808	0.0123679
C29:1	0.220608	0.257501	0.249899	0.27067	0.165442	0.172755	0.199791	0.186367
C29	3.46484	2.66679	2.834	3.63426	2.98214	2.27663	2.81644	2.74879
methyl-C29	0.721642	0.949526	0.895591	0.779161	0.528112	0.357538	0.644126	0.484399
C30	0.132152	0.151543	0.159589	0.148345	0.110356	0.0988552	0.114957	0.121064
methyl-C30	0.180632	0.190406	0.207777	0.178395	0.149826	0.106702	0.180365	0.167002
C31:1	0.246058	0.177146	0.241983	0.317786	0.211614	0.197775	0.249831	0.224319
C31	1.16587	0.795845	0.610793	0.79746	0.683717	0.578338	0.699391	0.649776
methyl-C31	2.40638	2.29099	2.82215	2.56031	2.18856	1.41652	2.71556	2.31181
dimethyl-C31	0.138175	0.166942	0.171202	0.277888	0.115644	0.0404554	0.116494	0.104951
C32	0.10127	0.0993584	0.117698	0.101116	0.101503	0.07345	0.102354	0.087777
methyl-C32	0.0328905	0.019004	0.018663	0.0524328	0.0396545	0.043221	0.0307371	0.0537121
dimethyl-C32	0.00566873	0.0137489	0.0146184	0.0144932	0.00233623	0.00488809	0.00387287	0.00367504
C-33	0.0441098	0.0586007	0.0645981	0.0511457	0.0482002	0.0492025	0.0537284	0.0578819
methyl-C33	0.533629	0.427559	0.561507	0.567583	0.48981	0.385323	0.579271	0.525319
dimethyl-C33	0.372365	0.369569	0.397816	0.27593	0.364452	0.300296	0.447716	0.396056
methyl-C34	0.0260407	0.0177207	0.0238632	0.0217677	0.0176447	0.0167224	0.0222536	0.0235344
dimethyl-C34	0.0439917	0.0358692	0.0399838	0.0412412	0.0484461	0.0558271	0.0519457	0.0465034
methyl-C35	0.0798347	0.0595784	0.0766742	0.0809714	0.0647997	0.0495241	0.0789328	0.0768932
dimethyl-C35	0.277768	0.239413	0.278847	0.231051	0.233685	0.191729	0.281613	0.271812
methyl-C36	0.00259817	0.00378857	0.00606691	0.00458857	0.00301251	0.0034088	0.00430319	0.00544189
dimethyl-C36	0.0145852	0.0152765	0.0127116	0.014717	0.0132182	0.0120916	0.012971	0.0120146
methyl-C37	0.0162976	0.01381	0.0165251	0.0180185	0.00725462	0.00848984	0.00805311	0.00890491
dimethyl-C37	0.11739	0.117324	0.123534	0.122269	0.0603732	0.0558914	0.0616586	0.0504611
methyl-C38	0.00336581	0.00482738	0.00468019	0.00363728	0.00411915	0.0041806	0.0021516	0.00416976
dimethyl-C38	0.0280484	0.0277421	0.0281389	0.0292102	0.0119886	0.014214	0.014385	0.0106011
methyl-C39	0.0199587	0.0237091	0.0285434	0.0263563	0.0109434	0.00984049	0.0133399	0.00911693
dimethyl-C39	0.412991	0.44198	0.484775	0.410789	0.210384	0.183946	0.197393	0.127213
methyl-C40	0.0087393	0.0110602	0.011556	0.00822585	0.00344287	0.00411629	0.00393435	0.00353369
dimethyl-C40	0.0572188	0.0626337	0.0623447	0.0517053	0.0317851	0.0272061	0.0341796	0.0174564
methylC41	0.0361382	0.0366636	0.0489975	0.0384432	0.0284037	0.0223823	0.0283396	0.01993
dimethyl-C41	0.584293	0.682126	0.698503	0.561372	0.354616	0.296758	0.338169	0.20559
methyl-C42	0.0082669	0.0114268	0.0114982	0.00889734	0.00497987	0.00424492	0.00534825	0.00360437
dimethyl-C42	0.0553292	0.062817	0.061998	0.0498587	0.0377486	0.0313224	0.0374992	0.0224743
methyl-C43	0.0376144	0.0375191	0.0429306	0.0463333	0.0317851	0.0230898	0.0328887	0.0294003
dimethyl-C43	0.503927	0.584051	0.619691	0.498419	0.359841	0.28338	0.332268	0.245309
methyl-C44	0.0102746	0.0113657	0.0114405	0.0130942	0.00750054	0.00488809	0.00805311	0.00537121
dimethyl-C44	0.0540892	0.0532844	0.0613625	0.0526007	0.0390397	0.0332519	0.0329501	0.0281282
methyl-C45	0.0339534	0.0281699	0.0381349	0.0351977	0.0264363	0.0180087	0.021393	0.0308138
dimethyl-C45	0.405433	0.42817	0.464552	0.423323	0.309121	0.23257	0.272392	0.227994
methyl-C46	0.00324771	0.00568286	0.00387127	0.00408494	0.00288955	0.00186519	0.00387287	0.00169617
dimethyl-C46	0.023915	0.0321418	0.0329347	0.0283708	0.0202883	0.0146643	0.0180119	0.0175271
methyl-C47	0.011987	0.0128323	0.0130005	0.0138217	0.0130337	0.00958323	0.0123563	0.0131453
dimethyl-C47	0.116268	0.150015	0.135841	0.140175	0.0892687	0.0690121	0.0903055	0.0696844
Sum of ngr	16.7483	15.7327	16.7845	16.7905	12.8181	9.98682	13.4673	12.091
mgr	3.9	3.5	4.1	3.9	3.4	2.6	2.7	3.1
Summary
	Control Female 1	Control Female 2	Control Female 3	Control Female 4	Desat3050i Female 1	Desat3050i Female 2	Desat3050i Female 3	Desat3050i Female 4
Total CHC ngr in 2ul	16.7483	15.7327	16.7845	16.7905	12.8181	9.98682	13.4673	12.091
Total CHC ngr in 100ul	837.417	786.636	839.227	839.523	640.903	499.341	673.366	604.551
ngr/mgr	214.722	224.753	204.689	215.262	188.501	192.054	249.395	195.017
	mean Control Female	mean Desat3050i Female	p-value
ngr/mgr	214.857	206.242	0.58
4 biological replicates, number of individuals per sample =2

## Sheet: Desat3050 Males
amount (ngr) of each CHC peak normalized to the internal standard
	Control Male 1	Control Male 2	Control Male 3	Control Male 4	Desat3050i Male 1	Desat3050i Male 2	Desat3050i Male 3	Desat3050i Male 4
C19	0.0089207	0.0138074	0.0187039	0.0110319	0.00937979	0.012179	0.0104864	0.0100624
C20	0.0174009	0.0177005	0.0242166	0.016976	0.0135285	0.0165475	0.0222267	0.0199288
C21	0.131167	0.155515	0.169975	0.135859	0.122719	0.124901	0.109538	0.087948
C22	0.0274229	0.0257981	0.0263823	0.0205022	0.020864	0.021578	0.0233665	0.025156
C23:1	0.005837	0.119232	0.00420016	0.00811022	0.00270571	0.00608949	0.00512923	0.00483518
C23	0.0956498	0.119232	0.12338	0.0940987	0.0927758	0.0927323	0.0921551	0.0774935
C24	0.0298458	0.0362315	0.0428548	0.0340025	0.0259147	0.0294546	0.0279258	0.0298605
C25:1	0.0162996	0.0252271	0.0129286	0.0169257	0.0119051	0.0119142	0.0143048	0.0225424
C25	0.256278	0.275526	0.270123	0.230159	0.259928	0.245036	0.252187	0.301349
methyl- C25	0.030011	0.0532572	0.0525677	0.0445306	0.023209	0.0245565	0.0260451	0.0284884
C26	0.0866189	0.0842979	0.086694	0.0803466	0.0663801	0.0712867	0.066509	0.0769055
C27:1	0.0107379	0.0159875	0.0112223	0.0122409	0.0185792	0.0141647	0.0106574	0.0141788
C27	1.51459	1.22165	1.43593	1.31899	1.06653	0.959558	1.00732	1.03205
methyl- C27	0.019989	0.0276148	0.0331419	0.0195955	0.0185191	0.0181361	0.0195481	0.0156163
methyl- C27	0.0240639	0.0289125	0.029073	0.0273531	0.0186393	0.0236299	0.0217137	0.025156
C28	0.12946	0.0992992	0.134208	0.109967	0.113279	0.0990204	0.111076	0.110098
methyl-C28	0.00748899	0.0101739	0.0118786	0.00967181	0.0129273	0.0122452	0.0107144	0.0136561
C29:1	0.0634361	0.0871529	0.0687777	0.0829156	0.0637345	0.0697644	0.0583592	0.0667777
C29	1.82814	1.33647	1.91265	1.42725	1.81397	1.43758	1.88151	1.76968
methyl-C29	0.396421	0.510148	0.554684	0.427121	0.365872	0.407797	0.421794	0.402757
C30	0.0867291	0.0972229	0.118852	0.0846787	0.0903707	0.0863119	0.0889636	0.0797805
methyl-C30	0.107544	0.116792	0.139262	0.0805984	0.105222	0.107294	0.0832075	0.101147
C31:1	0.0585903	0.0517519	0.0607711	0.05657	0.0707693	0.0605639	0.0644003	0.0650789
C31	0.389427	0.39237	0.450599	0.456842	0.409825	0.328435	0.49554	0.474828
methyl-C31	1.30865	1.31523	1.46376	1.32131	1.42988	1.33631	1.63771	1.51237
dimethyl-C31	0.0781388	0.0628082	0.12128	0.0820593	0.0979467	0.0336908	0.0832645	0.0898429
C32	0.0195485	0.020244	0.0232978	0.0189406	0.0707092	0.0199232	0.0212008	0.0214316
methyl-C32	0.060848	0.0540877	0.0977194	0.0645795	0.0591047	0.0655282	0.0747158	0.0735731
dimethyl-C32	0.0338656	0.0155204	0.0221165	0.0179835	0.00210444	0.033095	0.0458781	0.0663857
C-33	0.0397026	0.0399169	0.0393765	0.0314334	0.0392628	0.0206513	0.0442823	0.0213009
methyl-C33	0.26283	0.211575	0.302084	0.249855	0.319695	0.286868	0.33055	0.318599
dimethyl-C33	0.171421	0.152297	0.226021	0.11722	0.2369	0.176661	0.225857	0.209742
methyl-C34	0.0120595	0.009551	0.0135849	0.00559152	0.0143703	0.0116495	0.0146468	0.0107158
dimethyl-C34	0.0332599	0.0228913	0.0204102	0.0200992	0.0423894	0.0301827	0.0405209	0.0407723
methyl-C35	0.0285793	0.0242928	0.0360295	0.0276553	0.0324685	0.0297194	0.0339669	0.0301219
dimethyl-C35	0.136068	0.113522	0.153568	0.117875	0.153263	0.126423	0.155929	0.136823
methyl-C36	0.00143172	0.00243966	0.00223134	0.00171272	0.00180381	0.00205189	0.0026786	0.00307099
dimethyl-C36	0.00825991	0.00825331	0.00846596	0.00649825	0.00691459	0.00655282	0.0079788	0.00699141
methyl-C37	0.00688326	0.00856475	0.00597211	0.00458404	0.00607281	0.0066852	0.00381843	0.00509654
dimethyl-C37	0.0497247	0.0575655	0.0664151	0.0558144	0.0269368	0.0411702	0.0351067	0.0268548
methyl-C38	0.00225771	0.00181677	0.00196883	0.00075561	0.00354749	0.00185332	0.0019947	0.00261361
dimethyl-C38	0.0124449	0.0139112	0.017982	0.0140544	0.00685446	0.00781043	0.00809278	0.00771015
methyl-C39	0.0126101	0.0147937	0.0137162	0.0155656	0.00444939	0.00761186	0.00450232	0.00594596
dimethyl-C39	0.191134	0.238464	0.252075	0.230109	0.0811713	0.129071	0.106802	0.0811526
methyl-C40	0.00567181	0.00654036	0.00334701	0.00528927	0.00204431	0.00370665	0.00239364	0.00202555
dimethyl-C40	0.0294604	0.0335842	0.039639	0.0330957	0.0155729	0.0221075	0.0182373	0.015747
methylC41	0.0278634	0.0291721	0.0240853	0.025993	0.0142501	0.0207837	0.0166415	0.0147669
dimethyl-C41	0.308976	0.407527	0.399803	0.363398	0.17076	0.238615	0.18602	0.164657
methyl-C42	0.00748899	0.00607319	0.00682527	0.00680049	0.00342723	0.00430236	0.00370444	0.0040511
dimethyl-C42	0.03337	0.0406437	0.0425923	0.0311815	0.0214052	0.0254832	0.0243353	0.022085
methyl-C43	0.033315	0.0278225	0.0260541	0.0302748	0.0235697	0.0250199	0.0244493	0.0243719
dimethyl-C43	0.317511	0.381832	0.382346	0.329194	0.226799	0.257612	0.23811	0.216407
methyl-C44	0.00726872	0.00757851	0.00564397	0.00528927	0.00697472	0.00456712	0.00632605	0.00490052
dimethyl-C44	0.0272577	0.0366468	0.0397703	0.0301237	0.0243514	0.0236299	0.0282108	0.0233265
methyl-C45	0.0221916	0.014067	0.0220509	0.0190918	0.0205634	0.0182685	0.0229106	0.0205168
dimethyl-C45	0.244493	0.266182	0.326432	0.252374	0.212609	0.217104	0.239592	0.193015
methyl-C46	0.00154185	0.00238775	0.00157506	0.00256908	0.00306647	0.00191951	0.00336249	0.00254827
dimethyl-C46	0.0128304	0.0152608	0.0222477	0.0179332	0.00980068	0.0110537	0.0166985	0.0113692
methyl-C47	0.00814978	0.00825331	0.0071534	0.00564189	0.00968043	0.00721472	0.0100305	0.00869025
dimethyl-C47	0.0661894	0.0844018	0.105332	0.075158	0.0625921	0.0669182	0.0827515	0.0605704
Sum of ngr	8.96536	8.67708	10.136	8.44344	8.28085	7.60259	8.72795	8.31553
mgr	1.9	2.4	2.3	2.3	2.3	1.8	2.2	1.6
Summary
	Control Male 1	Control Male 2	Control Male 3	Control Male 4	Desat3050i Male 1	Desat3050i Male 2	Desat3050i Male 3	Desat3050i Male 4
Total CHC ngr in 2ul	8.96536	8.67708	10.136	8.44344	8.28085	7.60259	8.72795	8.31553
Total CHC ngr in 100ul	448.268	433.854	506.802	422.172	414.043	380.13	436.398	415.776
ngr/mgr	235.931	180.773	220.349	183.553	180.019	211.183	198.363	259.86
	mean Control Male	mean Desat3050i Male	p-value
ngr/mgr	205.151	212.356	0.75
4 biological replicates, number of individuals per sample =2

## Sheet: Percentage of each CHC
CHC	mean FAS1899i Females	mean Control Females
C29	16.6996	14.3066
methyl-C31	12.6347	14.4192
C27	10.8911	8.73387
C31	7.47806	7.05132
dimethyl-C43	4.81835	6.18907
methyl-C33	4.38448	5.22933
dimethyl-C41	4.1231	6.3528
methyl-C29	3.78957	5.05819
dimethyl-C45	3.73474	3.90687
dimethyl-C33	2.87418	3.17073
dimethyl-C39	2.58711	3.71802
C31:1	2.5743	1.21185
dimethyl-C35	2.50205	2.58653
C29:1	2.01575	0.801324
C28	1.91572	1.61276
C25	1.56815	0.825968
C30	1.41568	1.37778
methyl-C30	1.2103	1.61039
dimethyl-C31	1.06137	1.61327
dimethyl-C47	0.96742	0.703538
methyl-C32	0.823934	1.03915
C26	0.810511	0.48429
methyl-C35	0.760183	0.805862
dimethyl-C37	0.721384	0.786267
C-33	0.638521	0.620935
C24	0.620344	0.434247
C23	0.439198	0.318732
C21	0.435702	0.292899
dimethyl-C44	0.417635	0.4317
methyl-C43	0.390735	0.31298
dimethyl-C42	0.388757	0.41821
methylC41	0.331516	0.343598
dimethyl-C40	0.311255	0.385651
C32	0.28905	0.271245
methyl-C45	0.272256	0.175843
dimethyl-C32	0.259747	0.126368
C19	0.224847	0.11724
methyl- C27	0.221974	0.270371
dimethyl-C34	0.219314	0.18953
dimethyl-C46	0.199416	0.138707
methyl-C34	0.194731	0.18845
methyl-C28	0.166792	0.162102
methyl-C47	0.160461	0.110805
dimethyl-C38	0.147033	0.167963
methyl-C39	0.132235	0.151857
methyl-C37	0.130478	0.111598
methyl- C27	0.126832	0.125878
C27:1	0.104015	0.0300941
methyl-C44	0.101451	0.0758102
methyl-C42	0.101079	0.0705452
methyl-C36	0.0975237	0.0495434
C20	0.0900466	0.036349
methyl- C25	0.0816296	0.0442361
dimethyl-C36	0.0743745	0.0852464
methyl-C40	0.0716225	0.0333846
methyl-C46	0.0676734	0.0317012
C22	0.059518	0.0389337
methyl-C38	0.0276398	0.0205566
C23:1	0.0238572	0.00982503
C25:1	0.0188837	0.0118843
