# Supplementary material for: Isolation and transcriptomic analysis of Anopheles gambiae oenocytes enables the delineation of hydrocarbon biosynthesis
Source: eLife. 2020 Jun 15;9:e58019. doi: 10.7554/eLife.58019 (PMC7351493; doi:10.7554/eLife.58019)
Supplement: Supplementary file 1. [file elife-58019-supp1.xlsx]

## Sheet: information
Sheet 1: Differentially expressed genes in Female Oenocytes vs Female total carcass cells
Sheet 2: Differentially expressed genes in Male Oenocytes vs Male total carcass cells
Sheet 3: Commonly over-expressed genes in Female and Male Oenocytes vs Female and Male total carcass cells
log2FoldChange: log2 of the fold change in expression levels between the two groups compared
lfcSE standard error of the log2 fold change
stat: z-score of the log2 fold change used to calculated pvalue of differential expression
padj: corrected p-value, using Benjamini-Hochberg method
normcounts_i: mean normalised counts for samples of group i
normcounts_j: mean normalised counts for samples of group j
is_signif_pos: significantly differentially overexpressed, true if padj<0.001 and log2FC>1
is_signif_neg: significantly differentially down-regulated, true if padj<0.001 and log2FC<1
"is_signif_any": significantly differentially expressed (up or down), true if padj<0.001 and |log2FC|>1

## Sheet: Sheet 1
gene	log2FoldChange	lfcSE	stat	pvalue	padj	comparison	samples_i	normcounts_i	samples_j	normcounts_j	gene_name	is_signif_pos	is_signif_neg	is_signif_any
Anogam_AGAP004581	0.955991	0.517725253141811	1.84652092666315	0.0648166037070739	0.149202134787577	Fem.Oenocytes vs Female total carcass cells	Female Oenocytes	298335	Female total carcass cells	164596	heat shock protein 70kDa	FALSE	FALSE	FALSE
Anogam_AGAP001076	3.29421	0.700718610144854	4.7011904226613	2.58649168948106e-06	3.77531854019546e-05	Fem.Oenocytes vs Female total carcass cells	Female Oenocytes	266337	Female total carcass cells	29103.3	CYP4G16 cytochrome P450	TRUE	FALSE	TRUE
Anogam_AGAP004583	0.787225	0.509740312556859	1.54436415715942	0.122500138082561	0.238855859536431	Fem.Oenocytes vs Female total carcass cells	Female Oenocytes	226657	Female total carcass cells	140546	heat shock 70kDa protein	FALSE	FALSE	FALSE
Anogam_AGAP005547	1.38271	0.411060847848872	3.36375251243801	0.000768904605428872	0.0045740883271792	Fem.Oenocytes vs Female total carcass cells	Female Oenocytes	185751	Female total carcass cells	76189.1	alpha-crystallin B chain	FALSE	FALSE	FALSE
Anogam_AGAP028364	-0.0383171	0.360211349737099	-0.10637393274486	0.915285674369721	0.950203228505579	Fem.Oenocytes vs Female total carcass cells	Female Oenocytes	162957	Female total carcass cells	178972	COX1 cytochrome c oxidase subunit I	FALSE	FALSE	FALSE
Anogam_AGAP028371	-0.0845408	0.364413888095102	-0.231991255678618	0.816544805507971	0.884208535290249	Fem.Oenocytes vs Female total carcass cells	Female Oenocytes	145723	Female total carcass cells	165264	COX3 cytochrome c oxidase subunit III	FALSE	FALSE	FALSE
Anogam_AGAP007158	1.40104	0.440532382061636	3.18032786598119	0.00147108507820146	0.00773491393636039	Fem.Oenocytes vs Female total carcass cells	Female Oenocytes	139598	Female total carcass cells	56509.3	alpha-crystallin B chain	FALSE	FALSE	FALSE
Anogam_AGAP001899	3.44217	0.641741270247881	5.3638025407024	8.14879833225885e-08	1.84874732895061e-06	Fem.Oenocytes vs Female total carcass cells	Female Oenocytes	105057	Female total carcass cells	10352.5	fatty acid synthase2C animal type	TRUE	FALSE	TRUE
Anogam_AGAP006958	1.04649	0.389562336349377	2.68631833745572	0.00722442215995471	0.0275821968435286	Fem.Oenocytes vs Female total carcass cells	Female Oenocytes	99043.6	Female total carcass cells	51265.7	Hsp83 Heat shock protein 83	FALSE	FALSE	FALSE
Anogam_AGAP028366	-0.153601	0.367576247450046	-0.417875863829257	0.67603788022458	0.781783407601481	Fem.Oenocytes vs Female total carcass cells	Female Oenocytes	98668.6	Female total carcass cells	117374	COX2 cytochrome c oxidase subunit II	FALSE	FALSE	FALSE
Anogam_AGAP000877	3.26495	0.760979117595304	4.29046161710928	1.78302102416136e-05	0.000197740167382546	Fem.Oenocytes vs Female total carcass cells	Female Oenocytes	93677.3	Female total carcass cells	10451.8	CYP4G17 cytochrome P450	TRUE	FALSE	TRUE
Anogam_AGAP029054	3.88144	0.535815792216344	7.24397438396766	4.35723750646459e-13	5.05595173741875e-11	Fem.Oenocytes vs Female total carcass cells	Female Oenocytes	88480.4	Female total carcass cells	6413.17	NimB2 nimrod B2	TRUE	FALSE	TRUE
Anogam_AGAP002465	2.45309	0.343062938379614	7.15055345483763	8.64287173042682e-13	9.02386362711502e-11	Fem.Oenocytes vs Female total carcass cells	Female Oenocytes	85681	Female total carcass cells	16732.7	ferritin heavy chain	TRUE	FALSE	TRUE
Anogam_AGAP002464	2.34938	0.348608110082784	6.73930288194793	1.59148340332818e-11	1.09757274040655e-09	Fem.Oenocytes vs Female total carcass cells	Female Oenocytes	76614.7	Female total carcass cells	16080.6	secreted ferritin G subunit	TRUE	FALSE	TRUE
Anogam_AGAP004936	3.37234	0.484368849399119	6.96233936688241	3.34668102280076e-12	2.97767306306934e-10	Fem.Oenocytes vs Female total carcass cells	Female Oenocytes	73385.3	Female total carcass cells	7573.23		TRUE	FALSE	TRUE
Anogam_AGAP028387	-0.289806	0.351178960918144	-0.82523732891532	0.409236864403172	0.561216851864471	Fem.Oenocytes vs Female total carcass cells	Female Oenocytes	65464.9	Female total carcass cells	85590	CYTB cytochrome b	FALSE	FALSE	FALSE
Anogam_AGAP004977	3.60029	0.608390738330744	5.91772947027544	3.2641627697401e-09	1.13216655796545e-07	Fem.Oenocytes vs Female total carcass cells	Female Oenocytes	58317.4	Female total carcass cells	5133.46	PPO6 prophenoloxidase 6	TRUE	FALSE	TRUE
Anogam_AGAP006959	1.0377	0.365274462967791	2.84088479271086	0.00449885616874101	0.0189902212535305	Fem.Oenocytes vs Female total carcass cells	Female Oenocytes	56769.1	Female total carcass cells	29570	molecular chaperone HtpG	FALSE	FALSE	FALSE
Anogam_AGAP010057	3.51931	0.679763553322665	5.17724999917774	2.25180386075978e-07	4.47387516568816e-06	Fem.Oenocytes vs Female total carcass cells	Female Oenocytes	55750.8	Female total carcass cells	5215.38	nicotinic acetylcholine receptor2C beta-2 subunit	TRUE	FALSE	TRUE
Anogam_AGAP001971	1.01484	0.324701528100331	3.12545876815144	0.00177527955367939	0.00898351156936077	Fem.Oenocytes vs Female total carcass cells	Female Oenocytes	52316	Female total carcass cells	27683.8	Polyubiquitin-C	FALSE	FALSE	FALSE
Anogam_AGAP010833	3.47217	0.658032990275293	5.27658268700768	1.31615140314312e-07	2.8114532686765e-06	Fem.Oenocytes vs Female total carcass cells	Female Oenocytes	51244.3	Female total carcass cells	4953.41	CLIPB14 CLIP-domain serine protease	TRUE	FALSE	TRUE
Anogam_AGAP002076	-0.334446	0.273401536472187	-1.22327919713645	0.221224261624919	0.365366219198905	Fem.Oenocytes vs Female total carcass cells	Female Oenocytes	51115.7	Female total carcass cells	68846.9	heat shock 70kDa protein 1-8	FALSE	FALSE	FALSE
Anogam_AGAP028370	-0.366619	0.348110577101635	-1.05316699313047	0.292264463144207	0.44356838046273	Fem.Oenocytes vs Female total carcass cells	Female Oenocytes	48565.4	Female total carcass cells	66965.2	ATP6 adenosine triphosphatase subunit 6	FALSE	FALSE	FALSE
Anogam_AGAP000305	3.09062	0.521578314562015	5.92550589054715	3.11337423035293e-09	1.0982965374026e-07	Fem.Oenocytes vs Female total carcass cells	Female Oenocytes	46579.1	Female total carcass cells	5842.2	SPARC	TRUE	FALSE	TRUE
Anogam_AGAP002599	1.27906	0.218457467953813	5.85495278285576	4.77145556727877e-09	1.58651680948218e-07	Fem.Oenocytes vs Female total carcass cells	Female Oenocytes	46466	Female total carcass cells	20469.3	polyubiquitin	TRUE	FALSE	TRUE
Anogam_AGAP004582	1.52036	0.476292047181211	3.19207098707516	0.00141256612147324	0.00748104376548352	Fem.Oenocytes vs Female total carcass cells	Female Oenocytes	43956.8	Female total carcass cells	16403.9	heat shock 70kDa protein	FALSE	FALSE	FALSE
Anogam_AGAP009200	3.8107	0.631606648695447	6.03334995311053	1.60595107097789e-09	6.08595976231323e-08	Fem.Oenocytes vs Female total carcass cells	Female Oenocytes	38487.4	Female total carcass cells	2928.17	collagen type IV alpha	TRUE	FALSE	TRUE
Anogam_AGAP000651	1.77311	0.334944946779324	5.29372786686715	1.19847740460227e-07	2.59805525506153e-06	Fem.Oenocytes vs Female total carcass cells	Female Oenocytes	34297.8	Female total carcass cells	10729.1	Actin5C Actin-5C	TRUE	FALSE	TRUE
Anogam_AGAP007264	3.1576	0.696114257197195	4.53603848857363	5.73207238273094e-06	7.51930315642346e-05	Fem.Oenocytes vs Female total carcass cells	Female Oenocytes	34216.1	Female total carcass cells	4109.02	elongation of very long chain fatty acids protein 4	TRUE	FALSE	TRUE
Anogam_AGAP011228	4.40278	0.637773953552184	6.90335029257095	5.07901789759685e-12	4.25971402690254e-10	Fem.Oenocytes vs Female total carcass cells	Female Oenocytes	33461.9	Female total carcass cells	1690.99		TRUE	FALSE	TRUE
Anogam_AGAP010059	3.17855	0.653805610983457	4.86160597518729	1.16437216511129e-06	1.88212574935525e-05	Fem.Oenocytes vs Female total carcass cells	Female Oenocytes	32996.6	Female total carcass cells	3905.93		TRUE	FALSE	TRUE
Anogam_AGAP028380	-0.227678	0.324388024057695	-0.701870497678974	0.482759929029202	0.626614181634758	Fem.Oenocytes vs Female total carcass cells	Female Oenocytes	31148	Female total carcass cells	38997.1	ND5 NADH dehydrogenase subunit 5	FALSE	FALSE	FALSE
Anogam_AGAP007406	-1.26149	0.281656324375959	-4.47881177423443	7.5059681531305e-06	9.48161310405324e-05	Fem.Oenocytes vs Female total carcass cells	Female Oenocytes	30787.2	Female total carcass cells	78897.9	Elongation factor 1-alpha	FALSE	TRUE	TRUE
Anogam_AGAP012386	4.59667	0.722149252122186	6.36525744402815	1.94962446405005e-10	9.73100366641958e-09	Fem.Oenocytes vs Female total carcass cells	Female Oenocytes	30207	Female total carcass cells	1333.03		TRUE	FALSE	TRUE
Anogam_AGAP001218	0.750474	0.340023208480121	2.20712496416363	0.0273053301463752	0.0779760362985517	Fem.Oenocytes vs Female total carcass cells	Female Oenocytes	29784.9	Female total carcass cells	18927.4	tubulin alpha-4A chain	FALSE	FALSE	FALSE
Anogam_AGAP001082	0.831012	0.26743807975541	3.10730623569843	0.00188800708320542	0.00944091638168259	Fem.Oenocytes vs Female total carcass cells	Female Oenocytes	27841.2	Female total carcass cells	16741.6	saposin	FALSE	FALSE	FALSE
Anogam_AGAP005526	3.42638	0.616815517706696	5.55495479287408	2.77683617447618e-08	7.30400713039596e-07	Fem.Oenocytes vs Female total carcass cells	Female Oenocytes	27572.7	Female total carcass cells	2747.77	cubilin	TRUE	FALSE	TRUE
Anogam_AGAP005888	0.050782	1.42956654776001	0.0355226450408339	NA	NA	Fem.Oenocytes vs Female total carcass cells	Female Oenocytes	25774.5	Female total carcass cells	26554.5		FALSE	FALSE	FALSE
Anogam_AGAP000249	3.83357	0.472854895389982	8.10727790546709	5.17663707142731e-16	1.51335287185269e-13	Fem.Oenocytes vs Female total carcass cells	Female Oenocytes	24944.8	Female total carcass cells	1869.7	mannosyl-glycoprotein endo-beta-N-acetylglucosaminidase	TRUE	FALSE	TRUE
Anogam_AGAP009201	3.76712	0.659696227981689	5.71039069371346	1.12717112665308e-08	3.37228507833752e-07	Fem.Oenocytes vs Female total carcass cells	Female Oenocytes	24872.2	Female total carcass cells	1951.33	collagen type IV alpha	TRUE	FALSE	TRUE
Anogam_AGAP028382	-0.158308	0.347361703819675	-0.455743647768418	0.648574331047825	0.760510263039347	Fem.Oenocytes vs Female total carcass cells	Female Oenocytes	24543.2	Female total carcass cells	29293.3	ND4 NADH dehydrogenase subunit 4	FALSE	FALSE	FALSE
Anogam_AGAP012100	-0.914561	0.260797143225791	-3.50679177318399	0.000453543905378685	0.00296907309010538	Fem.Oenocytes vs Female total carcass cells	Female Oenocytes	24519.5	Female total carcass cells	49390.2	RpS26 40S ribosomal protein S26	FALSE	FALSE	FALSE
Anogam_AGAP003493	2.54129	0.52293111500428	4.85970202475243	1.17562561651468e-06	1.89433091467374e-05	Fem.Oenocytes vs Female total carcass cells	Female Oenocytes	23502.2	Female total carcass cells	4327.61	sugar transporter ERD6-like 6	TRUE	FALSE	TRUE
Anogam_AGAP000679	3.30548	0.549997153199238	6.00999398268586	1.85530212969684e-09	6.92826693104309e-08	Fem.Oenocytes vs Female total carcass cells	Female Oenocytes	22599.1	Female total carcass cells	2440.83	Aminoacylase	TRUE	FALSE	TRUE
Anogam_AGAP009441	-0.957626	0.282682184683315	-3.38764063183907	0.00070496566069322	0.00427322786742478	Fem.Oenocytes vs Female total carcass cells	Female Oenocytes	22377.8	Female total carcass cells	46448.8	elongation factor 2	FALSE	FALSE	FALSE
Anogam_AGAP010591	-0.973624	0.288272175063595	-3.37744676094283	0.000731621143247172	0.00440349855159121	Fem.Oenocytes vs Female total carcass cells	Female Oenocytes	22234.9	Female total carcass cells	46629.1	RpS20 40S ribosomal protein S20	FALSE	FALSE	FALSE
Anogam_AGAP006398	2.93768	0.44885579239694	6.54481039083531	5.95709170205957e-11	3.47321617486193e-09	Fem.Oenocytes vs Female total carcass cells	Female Oenocytes	22076	Female total carcass cells	3079.76		TRUE	FALSE	TRUE
Anogam_AGAP028049	3.37661	0.703885610658741	4.79710318331433	1.60976688709278e-06	2.48059258866466e-05	Fem.Oenocytes vs Female total carcass cells	Female Oenocytes	22063	Female total carcass cells	2277.04		TRUE	FALSE	TRUE
Anogam_AGAP004787	2.87387	0.69644640005464	4.12647130693086	3.6837194075941e-05	0.000360342418532532	Fem.Oenocytes vs Female total carcass cells	Female Oenocytes	21437.1	Female total carcass cells	3134.41	Fatty acyl-CoA reductase	TRUE	FALSE	TRUE
Anogam_AGAP011197	4.50082	0.735817716734992	6.11676061352651	9.54966544944536e-10	3.83185007367549e-08	Fem.Oenocytes vs Female total carcass cells	Female Oenocytes	19940.6	Female total carcass cells	940.608		TRUE	FALSE	TRUE
Anogam_AGAP000376	4.92335	0.983889688754163	5.00396140210829	5.61640073352166e-07	1.01352755388701e-05	Fem.Oenocytes vs Female total carcass cells	Female Oenocytes	19439.8	Female total carcass cells	684.303	Tsf1 Transferrin	TRUE	FALSE	TRUE
Anogam_AGAP002422	3.79298	0.501397202658054	7.56481974151844	3.88402830680367e-14	6.60299638606958e-12	Fem.Oenocytes vs Female total carcass cells	Female Oenocytes	19235.3	Female total carcass cells	1483.23	CLIPD1 CLIP-domain serine protease	TRUE	FALSE	TRUE
Anogam_AGAP002594	2.61004	0.362329531536585	7.20349389511979	5.86889105126732e-13	6.59895530072168e-11	Fem.Oenocytes vs Female total carcass cells	Female Oenocytes	19225.7	Female total carcass cells	3372.89	apolipoprotein D	TRUE	FALSE	TRUE
Anogam_AGAP012405	3.42647	0.659862596378622	5.19270983493646	2.07255070226809e-07	4.19097604458638e-06	Fem.Oenocytes vs Female total carcass cells	Female Oenocytes	19135.9	Female total carcass cells	1908.92		TRUE	FALSE	TRUE
Anogam_AGAP006921	1.94645	0.481427173085196	4.04308906246754	5.27515712881832e-05	0.000487142669152248	Fem.Oenocytes vs Female total carcass cells	Female Oenocytes	18646.6	Female total carcass cells	5185.64		TRUE	FALSE	TRUE
Anogam_AGAP001662	4.41992	0.618069548124304	7.15116176696369	8.60465145366432e-13	9.02386362711502e-11	Fem.Oenocytes vs Female total carcass cells	Female Oenocytes	18629.8	Female total carcass cells	929.66		TRUE	FALSE	TRUE
Anogam_AGAP011828	0.95772	0.294780946352991	3.24892229486691	0.0011584311829581	0.00637261713119747	Fem.Oenocytes vs Female total carcass cells	Female Oenocytes	18384.8	Female total carcass cells	10125.2	Cp1 Cathepsin L	FALSE	FALSE	FALSE
Anogam_AGAP010816	2.97678	0.603102509798289	4.93577904853934	7.98314463788844e-07	1.35686936768894e-05	Fem.Oenocytes vs Female total carcass cells	Female Oenocytes	18371.6	Female total carcass cells	2492.48	TEP3 thioester-containing protein 3	TRUE	FALSE	TRUE
Anogam_AGAP001381	3.01907	0.500134451726476	6.03651238652479	1.57480668725873e-09	5.99011971153579e-08	Fem.Oenocytes vs Female total carcass cells	Female Oenocytes	18057.9	Female total carcass cells	2379.22	laminin2C beta 1	TRUE	FALSE	TRUE
Anogam_AGAP003592	-0.816358	0.247698998360966	-3.29576454310566	0.000981542424804616	0.0055950652315325	Fem.Oenocytes vs Female total carcass cells	Female Oenocytes	18010.5	Female total carcass cells	33890.7	RpLP0 60S ribosomal protein LP0	FALSE	FALSE	FALSE
Anogam_AGAP013094	3.72687	0.76658093666138	4.86167224710805	1.16398233225428e-06	1.88212574935525e-05	Fem.Oenocytes vs Female total carcass cells	Female Oenocytes	17688.1	Female total carcass cells	1433.33	Elongation of very long chain fatty acids protein	TRUE	FALSE	TRUE
Anogam_AGAP011239	4.79658	0.895832798900083	5.35432393432407	NA	NA	Fem.Oenocytes vs Female total carcass cells	Female Oenocytes	17555	Female total carcass cells	674.992		FALSE	FALSE	FALSE
Anogam_AGAP010510	3.55543	0.457392484533862	7.77326643266367	7.64876235253616e-15	1.53455169394412e-12	Fem.Oenocytes vs Female total carcass cells	Female Oenocytes	17046.7	Female total carcass cells	1547.71	Tubulin beta chain	TRUE	FALSE	TRUE
Anogam_AGAP003768	-1.00956	0.26126570734328	-3.86412854862256	0.000111486501326578	0.000918462062458574	Fem.Oenocytes vs Female total carcass cells	Female Oenocytes	16613.7	Female total carcass cells	35742.7	RpS2 40S ribosomal protein S2	FALSE	FALSE	FALSE
Anogam_AGAP009124	1.17958	0.320469241691704	3.68079116308535	0.000232511384890326	0.00169327864071019	Fem.Oenocytes vs Female total carcass cells	Female Oenocytes	16519.5	Female total carcass cells	7801.17		FALSE	FALSE	FALSE
Anogam_AGAP005802	-0.583028	0.249285667971414	-2.33879343879085	0.019346126460845	0.0599485874278869	Fem.Oenocytes vs Female total carcass cells	Female Oenocytes	15392.4	Female total carcass cells	24644.4	RpL8 60S ribosomal protein L8	FALSE	FALSE	FALSE
Anogam_AGAP001473	3.31014	0.714057146538676	4.63567587004451	3.55773085471896e-06	4.97304673572191e-05	Fem.Oenocytes vs Female total carcass cells	Female Oenocytes	15219.4	Female total carcass cells	1644.43	propionyl-CoA synthetase	TRUE	FALSE	TRUE
Anogam_AGAP009668	1.70222	0.328161483919954	5.18712834340688	2.13561557528073e-07	4.2930488342382e-06	Fem.Oenocytes vs Female total carcass cells	Female Oenocytes	15173.5	Female total carcass cells	4988.48	lysosomal-associated membrane protein 1-2	TRUE	FALSE	TRUE
Anogam_AGAP003050	3.02786	0.734545459384561	4.12209227174731	3.75446747267407e-05	0.000365515805712665	Fem.Oenocytes vs Female total carcass cells	Female Oenocytes	15067.6	Female total carcass cells	1981.8	stearoyl-CoA desaturase (delta-9 desaturase)	TRUE	FALSE	TRUE
Anogam_AGAP006961	0.934075	0.358754761319138	2.60365984846264	0.00922342458891687	0.0333241809300132	Fem.Oenocytes vs Female total carcass cells	Female Oenocytes	14880	Female total carcass cells	8330.46	molecular chaperone HtpG	FALSE	FALSE	FALSE
Anogam_AGAP007120	-0.468601	0.299204979432143	-1.56615445171453	0.117312463023751	0.230613087734683	Fem.Oenocytes vs Female total carcass cells	Female Oenocytes	14876.2	Female total carcass cells	22015.3	nucleoside-diphosphate kinase	FALSE	FALSE	FALSE
Anogam_AGAP001151	0.646609	0.224168981386639	2.88447128622546	0.00392071511388262	0.0170491955143421	Fem.Oenocytes vs Female total carcass cells	Female Oenocytes	14763.3	Female total carcass cells	10086	14-3-3 protein epsilon	FALSE	FALSE	FALSE
Anogam_AGAP007740	-0.558286	0.271184883112493	-2.05869176718053	0.0395237754035678	0.103349672867188	Fem.Oenocytes vs Female total carcass cells	Female Oenocytes	14541.2	Female total carcass cells	22885.5	RpLP1 60S ribosomal protein LP1	FALSE	FALSE	FALSE
Anogam_AGAP010257	-0.773397	0.285645912629693	-2.70753732117816	0.00677844488720292	0.0262120363136282	Fem.Oenocytes vs Female total carcass cells	Female Oenocytes	14481.7	Female total carcass cells	26455.2	RpL13a 60S ribosomal protein L13a	FALSE	FALSE	FALSE
Anogam_AGAP012990	-0.30757	0.331677740888902	-0.927315025617991	0.353762995186598	0.507032212739777	Fem.Oenocytes vs Female total carcass cells	Female Oenocytes	14230.2	Female total carcass cells	18832.3	RpS23 40S ribosomal protein S23	FALSE	FALSE	FALSE
Anogam_AGAP000927	1.7046	0.272434407921005	6.25691304094277	3.92672213442299e-10	1.76220267014982e-08	Fem.Oenocytes vs Female total carcass cells	Female Oenocytes	14065.2	Female total carcass cells	4614.47	myosin regulatory light chain2C invertebrate	TRUE	FALSE	TRUE
Anogam_AGAP006723	2.69992	0.777407972440109	3.47297556957301	0.000514722206230273	0.0032978319437371	Fem.Oenocytes vs Female total carcass cells	Female Oenocytes	13941.7	Female total carcass cells	2304.3	COEAE2G carboxylesterase	FALSE	FALSE	FALSE
Anogam_AGAP013060	0.731265	0.629050310508023	1.16249059637232	0.245036242227208	0.392549057533864	Fem.Oenocytes vs Female total carcass cells	Female Oenocytes	13931.9	Female total carcass cells	8990.68		FALSE	FALSE	FALSE
Anogam_AGAP005984	2.59732	0.66662473705	3.89621991690232	9.77056779160626e-05	0.000822818515586134	Fem.Oenocytes vs Female total carcass cells	Female Oenocytes	13904.3	Female total carcass cells	2462.41	fatty acyl-CoA reductase 2	TRUE	FALSE	TRUE
Anogam_AGAP004978	3.7129	0.588062317066985	6.31379232959624	2.72279260933219e-10	1.31413273484372e-08	Fem.Oenocytes vs Female total carcass cells	Female Oenocytes	13880.6	Female total carcass cells	1130.05	PPO9 prophenoloxidase 9	TRUE	FALSE	TRUE
Anogam_AGAP012407	0.733369	0.265152276033509	2.76584129774697	0.00567761582550682	0.0228354422667397	Fem.Oenocytes vs Female total carcass cells	Female Oenocytes	13861.9	Female total carcass cells	8909.62	protein disulfide-isomerase A1	FALSE	FALSE	FALSE
Anogam_AGAP008468	3.32969	0.721187131667114	4.61695060129827	3.89419919770768e-06	5.36277876055787e-05	Fem.Oenocytes vs Female total carcass cells	Female Oenocytes	13810.7	Female total carcass cells	1473.65	fatty acid synthase2C animal type	TRUE	FALSE	TRUE
Anogam_AGAP001424	1.55587	0.305544590868885	5.0921167803816	3.54087888031107e-07	6.68455215928835e-06	Fem.Oenocytes vs Female total carcass cells	Female Oenocytes	13752.3	Female total carcass cells	4998.42	heat shock protein 90kDa beta	TRUE	FALSE	TRUE
Anogam_AGAP010623	0.935438	0.365350207425154	2.56038720229958	0.010455559869373	0.036801268862547	Fem.Oenocytes vs Female total carcass cells	Female Oenocytes	13644.2	Female total carcass cells	7632	X box-binding protein 1	FALSE	FALSE	FALSE
Anogam_AGAP011319	-0.682324	0.518768652688934	-1.31527521242481	0.188417425617082	0.325381788846241	Fem.Oenocytes vs Female total carcass cells	Female Oenocytes	13364	Female total carcass cells	22956.8	Pacifastin-related peptide	FALSE	FALSE	FALSE
Anogam_AGAP004248	3.82001	0.781592592179053	4.88747501345725	1.02137453305577e-06	1.68017752768917e-05	Fem.Oenocytes vs Female total carcass cells	Female Oenocytes	13213.8	Female total carcass cells	1003.44	GPXH3 glutathione peroxidase 3	TRUE	FALSE	TRUE
Anogam_AGAP003734	3.13142	0.677171509651545	4.62426148400098	3.75935386423866e-06	5.21215565567615e-05	Fem.Oenocytes vs Female total carcass cells	Female Oenocytes	13067.8	Female total carcass cells	1599.48		TRUE	FALSE	TRUE
Anogam_AGAP005986	3.0197	0.692924712701432	4.35790154241614	1.31315429390192e-05	0.000153732205208289	Fem.Oenocytes vs Female total carcass cells	Female Oenocytes	13040.9	Female total carcass cells	1723.53	fatty acyl-CoA reductase 2	TRUE	FALSE	TRUE
Anogam_AGAP006782	-1.10836	0.321660757911022	-3.44574065015565	0.000569496638774921	0.00357929337097358	Fem.Oenocytes vs Female total carcass cells	Female Oenocytes	12974.7	Female total carcass cells	29912.5	ADP2CATP carrier protein 1	FALSE	FALSE	FALSE
Anogam_AGAP004422	-0.483072	0.275661023282173	-1.75241307471415	0.0797028048380929	0.173477791768425	Fem.Oenocytes vs Female total carcass cells	Female Oenocytes	12667	Female total carcass cells	18921.4	RpL19 60S ribosomal protein L19	FALSE	FALSE	FALSE
Anogam_AGAP011317	0.45967	0.592647240205714	0.77562112346616	0.437972724378634	0.586485658401018	Fem.Oenocytes vs Female total carcass cells	Female Oenocytes	12584.6	Female total carcass cells	9809.45		FALSE	FALSE	FALSE
Anogam_AGAP007312	2.66187	0.420289404672523	6.33343051069519	2.39769321011516e-10	1.16824747266182e-08	Fem.Oenocytes vs Female total carcass cells	Female Oenocytes	12575	Female total carcass cells	2124.65		TRUE	FALSE	TRUE
Anogam_AGAP010131	-0.491748	0.303778247002889	-1.61877131880844	0.105496475342211	0.213660360411165	Fem.Oenocytes vs Female total carcass cells	Female Oenocytes	12190.7	Female total carcass cells	18332.4	ornithine decarboxylase antizyme 1	FALSE	FALSE	FALSE
Anogam_AGAP003197	3.52181	0.692710403156742	5.08410243373047	3.69368569676296e-07	6.94738824435269e-06	Fem.Oenocytes vs Female total carcass cells	Female Oenocytes	11810.1	Female total carcass cells	1102.1	fatty acyl-CoA elongase	TRUE	FALSE	TRUE
Anogam_AGAP002499	0.511606	0.436912841050907	1.17095558327984	0.241616631197326	0.388714051951422	Fem.Oenocytes vs Female total carcass cells	Female Oenocytes	11732.3	Female total carcass cells	8804.51	methylmalonate-semialdehyde dehydrogenase (acylating)2C mitochondrial	FALSE	FALSE	FALSE
Anogam_AGAP003532	-0.601403	0.27048807670551	-2.22340004737094	0.0261888365168328	0.0756541735852936	Fem.Oenocytes vs Female total carcass cells	Female Oenocytes	11497.5	Female total carcass cells	18651.6	RpS3a 40S ribosomal protein S3a	FALSE	FALSE	FALSE
Anogam_AGAP007619	2.81625	0.432286544797334	6.51477486094405	7.27987636175809e-11	4.06860281884352e-09	Fem.Oenocytes vs Female total carcass cells	Female Oenocytes	11390.4	Female total carcass cells	1728.82	cytosolic nonspecific dipeptidase	TRUE	FALSE	TRUE
Anogam_AGAP004559	1.90967	0.411145806912013	4.64474530113995	3.40496261950871e-06	4.79223899901143e-05	Fem.Oenocytes vs Female total carcass cells	Female Oenocytes	11378.8	Female total carcass cells	3243.5	Ras-related protein	TRUE	FALSE	TRUE
Anogam_AGAP007209	1.36235	0.471182274574921	2.8913439573396	0.00383598034642885	0.0167447742767321	Fem.Oenocytes vs Female total carcass cells	Female Oenocytes	11261.7	Female total carcass cells	4683.31	Tetraspanin	FALSE	FALSE	FALSE
Anogam_AGAP004017	3.85037	0.491224275055203	7.83831842220988	4.56619905926816e-15	9.34426975488635e-13	Fem.Oenocytes vs Female total carcass cells	Female Oenocytes	11079	Female total carcass cells	820.996		TRUE	FALSE	TRUE
Anogam_AGAP003277	1.10289	0.431786345070644	2.55425712653902	0.0106414640499707	0.0373528165212008	Fem.Oenocytes vs Female total carcass cells	Female Oenocytes	10908.4	Female total carcass cells	5437.43	cathepsin D	FALSE	FALSE	FALSE
Anogam_AGAP012616	3.52044	0.563690203197971	6.24534303823372	4.22871000068954e-10	1.86500692789032e-08	Fem.Oenocytes vs Female total carcass cells	Female Oenocytes	10838.5	Female total carcass cells	1008.28	PPO5 prophenoloxidase 5	TRUE	FALSE	TRUE
Anogam_AGAP004887	-0.418627	0.288160142846009	-1.45275814222933	0.14629091748707	0.271514406187933	Fem.Oenocytes vs Female total carcass cells	Female Oenocytes	10834.9	Female total carcass cells	15485.8	RpS17 40S ribosomal protein S17	FALSE	FALSE	FALSE
Anogam_AGAP004192	1.26171	0.307368764991321	4.10486980309283	4.04542653848632e-05	0.000387936310607236	Fem.Oenocytes vs Female total carcass cells	Female Oenocytes	10832.9	Female total carcass cells	4826.48	heat shock 70kDa protein 5	TRUE	FALSE	TRUE
Anogam_AGAP012056	1.45033	0.286378837193175	5.06437708051757	4.09737910119094e-07	7.60878093709358e-06	Fem.Oenocytes vs Female total carcass cells	Female Oenocytes	10642.2	Female total carcass cells	4164.49	cofilin	TRUE	FALSE	TRUE
Anogam_AGAP004993	3.13347	0.479784372510108	6.53099217687596	6.53354120025053e-11	3.69343610834052e-09	Fem.Oenocytes vs Female total carcass cells	Female Oenocytes	10570.7	Female total carcass cells	1286.32	laminin subunit alpha	TRUE	FALSE	TRUE
Anogam_AGAP004750	0.918272	0.341518187757975	2.68879355773113	0.00717107523049567	0.0274707756489823	Fem.Oenocytes vs Female total carcass cells	Female Oenocytes	10556.2	Female total carcass cells	5966.9	translation initiation factor 4G	FALSE	FALSE	FALSE
Anogam_AGAP000184	0.710136	0.414037393363265	1.71514963635865	0.0863177958700186	0.183618230216638	Fem.Oenocytes vs Female total carcass cells	Female Oenocytes	10546.7	Female total carcass cells	6894.06	malate dehydrogenase (oxaloacetate-decarboxylating)(NADP+)	FALSE	FALSE	FALSE
Anogam_AGAP009212	2.65796	0.465723014705959	5.70716640697266	1.14872463420663e-08	3.4167879236053e-07	Fem.Oenocytes vs Female total carcass cells	Female Oenocytes	10514.3	Female total carcass cells	1782.13	SRPN6 serine protease inhibitor (serpin) 6	TRUE	FALSE	TRUE
Anogam_AGAP007901	1.81626	0.293022894862146	6.19835475901679	5.70564224713088e-10	2.41240212696873e-08	Fem.Oenocytes vs Female total carcass cells	Female Oenocytes	10455	Female total carcass cells	3177.27	Ras-related protein Rab-5C	TRUE	FALSE	TRUE
Anogam_AGAP002437	-0.57963	0.289198250504344	-2.00426686385262	0.0450414814311989	0.114131856860829	Fem.Oenocytes vs Female total carcass cells	Female Oenocytes	10203.3	Female total carcass cells	16304.1	RpS8 40S ribosomal protein S8	FALSE	FALSE	FALSE
Anogam_AGAP005991	-0.654514	0.277869303769543	-2.35547315180418	0.0184991337972153	0.0578670550330502	Fem.Oenocytes vs Female total carcass cells	Female Oenocytes	10165.8	Female total carcass cells	17108.1	RpL14 60S ribosomal protein L14	FALSE	FALSE	FALSE
Anogam_AGAP005960	-0.691368	0.285151484952115	-2.42456293281975	0.0153268265851356	0.0498963059558091	Fem.Oenocytes vs Female total carcass cells	Female Oenocytes	10072.2	Female total carcass cells	17388.3	RpL7a 60S ribosomal protein L7a	FALSE	FALSE	FALSE
Anogam_AGAP004016	3.81769	0.506010815270907	7.54468365832296	4.53386679264461e-14	7.13700384959072e-12	Fem.Oenocytes vs Female total carcass cells	Female Oenocytes	9959.4	Female total carcass cells	754.648		TRUE	FALSE	TRUE
Anogam_AGAP029128	0.443137	0.318115565481983	1.39300706068804	0.163617655563235	0.29416989800195	Fem.Oenocytes vs Female total carcass cells	Female Oenocytes	9925.27	Female total carcass cells	7800.11		FALSE	FALSE	FALSE
Anogam_AGAP011284	-0.604784	0.270716346590083	-2.23401213630616	0.025482274529925	0.0739995089097713	Fem.Oenocytes vs Female total carcass cells	Female Oenocytes	9854.89	Female total carcass cells	16025.6	Eukaryotic translation initiation factor 5A	FALSE	FALSE	FALSE
Anogam_AGAP009863	-0.312921	0.255171949774819	-1.22631304951683	0.22008089248249	0.363791226475094	Fem.Oenocytes vs Female total carcass cells	Female Oenocytes	9739.42	Female total carcass cells	12936.8	eukaryotic translation initiation factor 4A2C isoform 2	FALSE	FALSE	FALSE
Anogam_AGAP002879	1.32808	0.247177891259371	5.37298209270021	7.74450227184817e-08	1.77239731960772e-06	Fem.Oenocytes vs Female total carcass cells	Female Oenocytes	9659.71	Female total carcass cells	4115.95	cathepsin F	TRUE	FALSE	TRUE
Anogam_AGAP003195	3.48705	0.749661670164333	4.65149433610629	3.29538327287306e-06	4.65723227182833e-05	Fem.Oenocytes vs Female total carcass cells	Female Oenocytes	9595.76	Female total carcass cells	918.021	fatty acyl-CoA elongase	TRUE	FALSE	TRUE
Anogam_AGAP001470	3.81317	0.594071762870281	6.41870974017762	1.37434162369623e-10	7.10215327962618e-09	Fem.Oenocytes vs Female total carcass cells	Female Oenocytes	9411.44	Female total carcass cells	715.658		TRUE	FALSE	TRUE
Anogam_AGAP000739	-1.16356	0.355005572823554	-3.27758192995099	0.00104700340765081	0.00587332174730435	Fem.Oenocytes vs Female total carcass cells	Female Oenocytes	9390.54	Female total carcass cells	22450.1	RpS10 40S ribosomal protein S10	FALSE	FALSE	FALSE
Anogam_AGAP002186	2.24811	0.457034773019036	4.91890892310787	8.70279485281359e-07	1.45978683498342e-05	Fem.Oenocytes vs Female total carcass cells	Female Oenocytes	9384.05	Female total carcass cells	2110.13	very low-density lipoprotein receptor	TRUE	FALSE	TRUE
Anogam_AGAP006871	-0.794573	0.268435162029744	-2.96001871178773	0.0030762035765101	0.0139705792254112	Fem.Oenocytes vs Female total carcass cells	Female Oenocytes	9381.27	Female total carcass cells	17396.4	RpS4 40S ribosomal protein S4	FALSE	FALSE	FALSE
Anogam_AGAP002306	-0.790881	0.278141319534492	-2.84345190963685	0.00446277435903269	0.0188924730002575	Fem.Oenocytes vs Female total carcass cells	Female Oenocytes	9376.51	Female total carcass cells	17346.6	RpL4 60S ribosomal protein L4	FALSE	FALSE	FALSE
Anogam_AGAP006037	-0.86009	0.279690754189919	-3.07514550686786	0.0021039987895769	0.0102666113029396	Fem.Oenocytes vs Female total carcass cells	Female Oenocytes	9339.32	Female total carcass cells	18122.4	RpL24 60S ribosomal protein L24	FALSE	FALSE	FALSE
Anogam_AGAP010065	-0.675308	0.282581405718095	-2.38978202174948	0.0168583750922677	0.0538205597329433	Fem.Oenocytes vs Female total carcass cells	Female Oenocytes	9313.65	Female total carcass cells	15901.7	RpL12 60S ribosomal protein L12	FALSE	FALSE	FALSE
Anogam_AGAP012334	-0.102228	0.353276837171949	-0.289370107468504	0.772298167728343	0.853064246830581	Fem.Oenocytes vs Female total carcass cells	Female Oenocytes	9256.11	Female total carcass cells	10629.9	high mobility group protein D2C isoform C	FALSE	FALSE	FALSE
Anogam_AGAP001911	-0.264099	0.33532114208488	-0.787601225313356	0.430929997747802	0.580320576066795	Fem.Oenocytes vs Female total carcass cells	Female Oenocytes	9229.24	Female total carcass cells	11846.5	RpL6 60S ribosomal protein L6	FALSE	FALSE	FALSE
Anogam_AGAP002413	-0.100408	0.276241063117006	-0.363480867984566	0.716245702191815	0.811366076374415	Fem.Oenocytes vs Female total carcass cells	Female Oenocytes	9193.03	Female total carcass cells	10531.3	Basic leucine zipper and W2 domain-containing protein 1	FALSE	FALSE	FALSE
Anogam_AGAP001502	0.602755	0.30392142493982	1.98325776583788	0.0473386443744745	0.118176759448463	Fem.Oenocytes vs Female total carcass cells	Female Oenocytes	9174.33	Female total carcass cells	6457.9	mitochondrial 10 kDa heat shock protein	FALSE	FALSE	FALSE
Anogam_AGAP000790	4.00053	0.451979663640185	8.85112984826424	8.66376873567977e-19	4.92487120574863e-16	Fem.Oenocytes vs Female total carcass cells	Female Oenocytes	9145.47	Female total carcass cells	610.842		TRUE	FALSE	TRUE
Anogam_AGAP008366	2.41119	0.376657986348742	6.40154897583418	1.53808458426842e-10	7.86884073311724e-09	Fem.Oenocytes vs Female total carcass cells	Female Oenocytes	9088.5	Female total carcass cells	1828.31	TEP2 thioester-containing protein 2	TRUE	FALSE	TRUE
Anogam_AGAP009584	0.433478	0.295505680336444	1.46690117583048	0.142402940625212	0.266325514252818	Fem.Oenocytes vs Female total carcass cells	Female Oenocytes	9083.33	Female total carcass cells	7192.75	TRX1 Thioredoxin	FALSE	FALSE	FALSE
Anogam_AGAP007107	0.719228	0.418408884337074	1.71895852984946	0.0856219233612582	0.182707720507277	Fem.Oenocytes vs Female total carcass cells	Female Oenocytes	9053.79	Female total carcass cells	5884.79	DnaJ homolog subfamily B member 4	FALSE	FALSE	FALSE
Anogam_AGAP006459	-0.0273136	0.251339788393009	-0.108671892278841	0.913462736504055	0.949177487550471	Fem.Oenocytes vs Female total carcass cells	Female Oenocytes	9026.22	Female total carcass cells	9833.17	SUI1 protein translation factor SUI1	FALSE	FALSE	FALSE
Anogam_AGAP007643	0.0514333	0.271208420331518	0.189645031874588	0.849587297167021	0.905612795563388	Fem.Oenocytes vs Female total carcass cells	Female Oenocytes	9021.76	Female total carcass cells	9311.74	Tyrosine 3-monooxygenase-tryptophan 5-monooxygenase activation protein2C beta polypeptide 2	FALSE	FALSE	FALSE
Anogam_AGAP009883	1.0311	0.38689201163878	2.66507565064773	0.00769710054676587	0.0289653301929049	Fem.Oenocytes vs Female total carcass cells	Female Oenocytes	8962.48	Female total carcass cells	4690.95		FALSE	FALSE	FALSE
Anogam_AGAP012053	2.29113	0.279587051375797	8.19470174323423	2.51215293912708e-16	7.67386448456352e-14	Fem.Oenocytes vs Female total carcass cells	Female Oenocytes	8953.23	Female total carcass cells	1957.7	alpha2Calpha-trehalase	TRUE	FALSE	TRUE
Anogam_AGAP001919	1.49597	0.287155131970924	5.20962222081984	1.89225523651962e-07	3.88786256627886e-06	Fem.Oenocytes vs Female total carcass cells	Female Oenocytes	8936.38	Female total carcass cells	3387.57	protein disulfide-isomerase A6	TRUE	FALSE	TRUE
Anogam_AGAP002667	-1.41263	0.32965007755461	-4.28523090194914	1.82549489869495e-05	0.000200627967813606	Fem.Oenocytes vs Female total carcass cells	Female Oenocytes	8884.56	Female total carcass cells	25277.7	Tctp Translationally-controlled tumor protein homolog	FALSE	TRUE	TRUE
Anogam_AGAP013103	-0.691916	0.298892261421102	-2.31493413376858	0.0206165369847548	0.0628570936913026	Fem.Oenocytes vs Female total carcass cells	Female Oenocytes	8804.78	Female total carcass cells	15199.5		FALSE	FALSE	FALSE
Anogam_AGAP010580	3.83067	0.522928054009774	7.32542937593502	2.38135012080185e-13	3.12384287641596e-11	Fem.Oenocytes vs Female total carcass cells	Female Oenocytes	8580.94	Female total carcass cells	644.251		TRUE	FALSE	TRUE
Anogam_AGAP005246	2.59191	0.307047824416717	8.44139909035009	3.13561556525845e-17	1.18828216532313e-14	Fem.Oenocytes vs Female total carcass cells	Female Oenocytes	8575.57	Female total carcass cells	1521.73	SRPN10 serine protease inhibitor (serpin) 10	TRUE	FALSE	TRUE
Anogam_AGAP009053	3.0207	0.44335440022651	6.81328739226973	9.53932996908674e-12	7.17694295909526e-10	Fem.Oenocytes vs Female total carcass cells	Female Oenocytes	8563.17	Female total carcass cells	1128.86	LL3 lipopolysaccharide-induced TNF-alpha transcription factor (LITAF-like 3)	TRUE	FALSE	TRUE
Anogam_AGAP013742	-0.789582	0.279269975604878	-2.82730686358786	0.00469413217564474	0.0196604013185415	Fem.Oenocytes vs Female total carcass cells	Female Oenocytes	8460.33	Female total carcass cells	15632.1	40S ribosomal protein S27a	FALSE	FALSE	FALSE
Anogam_AGAP028028	3.82487	0.533621087618787	7.16777269929635	7.62277242820302e-13	8.29746888142269e-11	Fem.Oenocytes vs Female total carcass cells	Female Oenocytes	8380.24	Female total carcass cells	632.116	LRIM16A leucine-rich immune protein (TM)	TRUE	FALSE	TRUE
Anogam_AGAP007938	1.08621	0.335760237222281	3.23507846504908	0.00121609306153503	0.00661513248571316	Fem.Oenocytes vs Female total carcass cells	Female Oenocytes	8367.44	Female total carcass cells	4214.71	cact protein cactus (TOLL pathway signalling)	FALSE	FALSE	FALSE
Anogam_AGAP003025	-0.767602	0.323928600270707	-2.36966510815439	0.0178042036873648	0.0561221848826608	Fem.Oenocytes vs Female total carcass cells	Female Oenocytes	8365.44	Female total carcass cells	15201.2	RpLp2 60S ribosomal protein LP2	FALSE	FALSE	FALSE
Anogam_AGAP012138	-0.592861	0.254408751427714	-2.33035009949946	0.0197876548650333	0.0608893089841009	Fem.Oenocytes vs Female total carcass cells	Female Oenocytes	8346.19	Female total carcass cells	13455.6	RpL21 60S ribosomal protein L21	FALSE	FALSE	FALSE
Anogam_AGAP028693	-0.597801	0.269115223352296	-2.22135637618969	0.0263268332404381	0.0759875000616167	Fem.Oenocytes vs Female total carcass cells	Female Oenocytes	8194.45	Female total carcass cells	13256.5	RpS18 40S ribosomal protein S18	FALSE	FALSE	FALSE
Anogam_AGAP010957	0.433233	0.244300122451968	1.77336378299633	0.0761684462298468	0.167856028822699	Fem.Oenocytes vs Female total carcass cells	Female Oenocytes	8184.05	Female total carcass cells	6479.36	calmodulin	FALSE	FALSE	FALSE
Anogam_AGAP007580	-0.734063	0.281966484000725	-2.6033711042628	0.00923119717877636	0.0333404904812	Fem.Oenocytes vs Female total carcass cells	Female Oenocytes	8180.76	Female total carcass cells	14545.9	RpL18 60S ribosomal protein L18	FALSE	FALSE	FALSE
Anogam_AGAP009861	1.21292	0.443629147862605	2.73408881887578	0.00625531684021817	0.0246170776573509	Fem.Oenocytes vs Female total carcass cells	Female Oenocytes	8168.81	Female total carcass cells	3766.18	Profilin protein	FALSE	FALSE	FALSE
Anogam_AGAP002468	-0.572519	0.298299855198519	-1.91927408246476	0.0549496562391636	0.131951392311458	Fem.Oenocytes vs Female total carcass cells	Female Oenocytes	8074.45	Female total carcass cells	12836.3	RpL26 60S ribosomal protein L26	FALSE	FALSE	FALSE
Anogam_AGAP012284	-0.719978	0.300097094983906	-2.39915015654843	0.0164331743786653	0.0527428608037965	Fem.Oenocytes vs Female total carcass cells	Female Oenocytes	8062.61	Female total carcass cells	14198.4	RpL18a-1 60S ribosomal protein L18a	FALSE	FALSE	FALSE
Anogam_AGAP005134	-1.56758	0.291771981875238	-5.3726147566263	7.76030100844662e-08	1.77239731960772e-06	Fem.Oenocytes vs Female total carcass cells	Female Oenocytes	8016.87	Female total carcass cells	25406.9	F-type H+-transporting ATPase subunit alpha	FALSE	TRUE	TRUE
Anogam_AGAP011050	1.13304	0.612212556930725	1.85072364822948	0.0642093201469966	0.148204322974074	Fem.Oenocytes vs Female total carcass cells	Female Oenocytes	7895.78	Female total carcass cells	3864.98	aldehyde reductase	FALSE	FALSE	FALSE
Anogam_AGAP007087	-1.07865	0.257945441204111	-4.18170536368675	2.89330752075388e-05	0.000295976337963587	Fem.Oenocytes vs Female total carcass cells	Female Oenocytes	7865.49	Female total carcass cells	17750.7	RpL41 60s ribosomal protein L41	FALSE	TRUE	TRUE
Anogam_AGAP003408	2.06211	0.501354503064272	4.11307336147721	3.90426245470715e-05	0.000377584247982642	Fem.Oenocytes vs Female total carcass cells	Female Oenocytes	7864.82	Female total carcass cells	2017.46	aldose reductase	TRUE	FALSE	TRUE
Anogam_AGAP011119	3.66732	0.55798759989307	6.57240680019145	4.95083770829238e-11	3.01529591852665e-09	Fem.Oenocytes vs Female total carcass cells	Female Oenocytes	7753.64	Female total carcass cells	651.936		TRUE	FALSE	TRUE
Anogam_AGAP006278	0.319874	0.46569672838305	0.686872875578677	0.492162841102769	0.633939110292233	Fem.Oenocytes vs Female total carcass cells	Female Oenocytes	7731.06	Female total carcass cells	6621.78		FALSE	FALSE	FALSE
Anogam_AGAP004904	1.86629	0.561374735540366	3.32449122894124	0.000885800197260005	0.00513861770543381	Fem.Oenocytes vs Female total carcass cells	Female Oenocytes	7690.16	Female total carcass cells	2260.19	CAT1 Catalase	FALSE	FALSE	FALSE
Anogam_AGAP003196	3.3633	0.787522387807427	4.27074133415184	1.94824268945503e-05	0.000211618038200678	Fem.Oenocytes vs Female total carcass cells	Female Oenocytes	7687.61	Female total carcass cells	801.662	elongation of very long chain fatty acids protein 7	TRUE	FALSE	TRUE
Anogam_AGAP009273	4.02844	0.572682435028708	7.03434098513398	2.00204975828226e-12	1.84889392188472e-10	Fem.Oenocytes vs Female total carcass cells	Female Oenocytes	7651.16	Female total carcass cells	501.166	Seminal fluid protein HACP027	TRUE	FALSE	TRUE
Anogam_AGAP003556	-0.70006	0.264322903087715	-2.64850131511402	0.00808495346723556	0.0300826881877589	Fem.Oenocytes vs Female total carcass cells	Female Oenocytes	7607.86	Female total carcass cells	13212.4	RpL3 60S ribosomal protein L3	FALSE	FALSE	FALSE
Anogam_AGAP002858	-0.292209	0.354788206045781	-0.823614383832128	0.410158700414843	0.56194374725742	Fem.Oenocytes vs Female total carcass cells	Female Oenocytes	7553.97	Female total carcass cells	9881.82	Sodium-potassium-transporting ATPase subunit alpha	FALSE	FALSE	FALSE
Anogam_AGAP003733	3.00093	0.704232614309011	4.26128017930697	2.03259218446961e-05	0.000219378465719806	Fem.Oenocytes vs Female total carcass cells	Female Oenocytes	7508.56	Female total carcass cells	1006.1	alpha-tocopherol transfer protein-like protein	TRUE	FALSE	TRUE
Anogam_AGAP000092	1.93307	0.288941904489038	6.69018536368693	2.22888088310872e-11	1.4809031945434e-09	Fem.Oenocytes vs Female total carcass cells	Female Oenocytes	7505.1	Female total carcass cells	2101.81	methylsterol monooxygenase	TRUE	FALSE	TRUE
Anogam_AGAP011974	3.40876	0.549136972308745	6.20748277887007	5.38400066072951e-10	2.31466784708338e-08	Fem.Oenocytes vs Female total carcass cells	Female Oenocytes	7503.9	Female total carcass cells	755.497	SCRC1 Class C Scavenger Receptor (Sushi-SCR-CCP and Somatomedin B domains).	TRUE	FALSE	TRUE
Anogam_AGAP003620	-2.72221	0.527627495748516	-5.15933508108586	2.47828416537945e-07	4.84852840920889e-06	Fem.Oenocytes vs Female total carcass cells	Female Oenocytes	7502.22	Female total carcass cells	52756.1		FALSE	TRUE	TRUE
Anogam_AGAP012956	0.371592	0.310842405770858	1.19543420372397	0.231917428792936	0.377855511943587	Fem.Oenocytes vs Female total carcass cells	Female Oenocytes	7468.37	Female total carcass cells	6176.49		FALSE	FALSE	FALSE
Anogam_AGAP011173	-0.604696	0.277680116205112	-2.17767032780366	0.0294305895177226	0.0823530888706396	Fem.Oenocytes vs Female total carcass cells	Female Oenocytes	7467.9	Female total carcass cells	12137.5	RpL11 60S ribosomal protein L11	FALSE	FALSE	FALSE
Anogam_AGAP011054	0.424627	0.24394832804927	1.74064221613225	0.0817463128428106	0.176759990069239	Fem.Oenocytes vs Female total carcass cells	Female Oenocytes	7343.41	Female total carcass cells	5847.61	TPX2 thioredoxin peroxidase 2	FALSE	FALSE	FALSE
Anogam_AGAP005175	-0.655805	0.546717023830366	-1.19953202937973	0.230321138214809	0.376340767520588	Fem.Oenocytes vs Female total carcass cells	Female Oenocytes	7305.34	Female total carcass cells	12315.5	acetyl-CoA carboxylase - biotin carboxylase	FALSE	FALSE	FALSE
Anogam_AGAP011424	-0.683643	0.287464505772987	-2.37818325367863	0.0173981771225555	0.0552679752617162	Fem.Oenocytes vs Female total carcass cells	Female Oenocytes	7272.61	Female total carcass cells	12487.4	RpS16 40S ribosomal protein S16	FALSE	FALSE	FALSE
Anogam_AGAP009833	-0.172951	0.32471624495517	-0.532622797761684	0.59429471755786	0.71936105193688	Fem.Oenocytes vs Female total carcass cells	Female Oenocytes	7236.96	Female total carcass cells	8732.68	voltage-dependent anion-selective channel protein 2	FALSE	FALSE	FALSE
Anogam_AGAP010252	-0.743127	0.286855530865768	-2.59059559151633	0.00958100083251445	0.0343613040723056	Fem.Oenocytes vs Female total carcass cells	Female Oenocytes	7211.62	Female total carcass cells	12902.5	RpL23 60S ribosomal protein L23	FALSE	FALSE	FALSE
Anogam_AGAP005548	0.695941	0.449500062073859	1.54825456639927	0.121561018485435	0.237396859811982	Fem.Oenocytes vs Female total carcass cells	Female Oenocytes	7189.51	Female total carcass cells	4744.04	alpha-crystallin B chain	FALSE	FALSE	FALSE
Anogam_AGAP001377	-0.546153	0.377725302064227	-1.44589964969824	0.148205350208982	0.273725116126048	Fem.Oenocytes vs Female total carcass cells	Female Oenocytes	7159.85	Female total carcass cells	11190	SRPN11 serine protease inhibitor (serpin) 11	FALSE	FALSE	FALSE
Anogam_AGAP000500	1.85168	0.479278035930052	3.86347507849909	0.000111785302613806	0.000919443099955356	Fem.Oenocytes vs Female total carcass cells	Female Oenocytes	7159.6	Female total carcass cells	2124.56	Cpr NADPH cytochrome P450 reductase	TRUE	FALSE	TRUE
Anogam_AGAP003300	2.46922	0.307205027466395	8.03770145241467	9.15393266817167e-16	2.28446436733494e-13	Fem.Oenocytes vs Female total carcass cells	Female Oenocytes	7137.88	Female total carcass cells	1378.75	solute carrier family 39 (zinc transporter)	TRUE	FALSE	TRUE
Anogam_AGAP008916	-0.478584	0.264254056947969	-1.81107497805222	0.0701292462087273	0.158157912102204	Fem.Oenocytes vs Female total carcass cells	Female Oenocytes	7098	Female total carcass cells	10575.6	RpL7 60S ribosomal protein L7	FALSE	FALSE	FALSE
Anogam_AGAP028032	3.65779	0.649344226894746	5.63305269191183	1.77047334528557e-08	5.0042771461221e-07	Fem.Oenocytes vs Female total carcass cells	Female Oenocytes	7073.73	Female total carcass cells	599.656		TRUE	FALSE	TRUE
Anogam_AGAP010188	0.997839	0.282430510133935	3.53304172497878	0.000410807630146139	0.00273657791123391	Fem.Oenocytes vs Female total carcass cells	Female Oenocytes	7045.99	Female total carcass cells	3770.46	stress-induced-phosphoprotein 1	FALSE	FALSE	FALSE
Anogam_AGAP003790	1.37401	0.4285627427691	3.20609830111501	0.00134548016142913	0.00720782880195959	Fem.Oenocytes vs Female total carcass cells	Female Oenocytes	7039.19	Female total carcass cells	2907.77	ANXB9 annexin B9	FALSE	FALSE	FALSE
Anogam_AGAP002122	-0.665692	0.263179451324081	-2.52942161132726	0.0114250692088944	0.0395605103706963	Fem.Oenocytes vs Female total carcass cells	Female Oenocytes	6982.5	Female total carcass cells	11836.6	RpL32 60S ribosomal protein L32	FALSE	FALSE	FALSE
Anogam_AGAP004115	3.26933	0.605213184120139	5.40194587955698	6.59218413812883e-08	1.54704651608565e-06	Fem.Oenocytes vs Female total carcass cells	Female Oenocytes	6896.54	Female total carcass cells	767.326	cystinosin	TRUE	FALSE	TRUE
Anogam_AGAP005947	-0.54029	0.290123904238135	-1.86227487188662	0.0625643555314084	0.145556727102631	Fem.Oenocytes vs Female total carcass cells	Female Oenocytes	6877.5	Female total carcass cells	10689.6	RpS13 40S ribosomal protein S13	FALSE	FALSE	FALSE
Anogam_AGAP003021	2.35697	0.312170717108284	7.55025843890523	4.34395385163296e-14	6.9448962202982e-12	Fem.Oenocytes vs Female total carcass cells	Female Oenocytes	6855.83	Female total carcass cells	1432.58	Clathrin heavy chain	TRUE	FALSE	TRUE
Anogam_AGAP002921	-0.78492	0.270373511662373	-2.90309445651023	0.00369495175877533	0.0162082581832871	Fem.Oenocytes vs Female total carcass cells	Female Oenocytes	6784.96	Female total carcass cells	12499.1	RpL36 60S ribosomal protein L36	FALSE	FALSE	FALSE
Anogam_AGAP007737	1.78618	0.544598521217401	3.27981529885384	0.00103875067137735	0.0058334230897547	Fem.Oenocytes vs Female total carcass cells	Female Oenocytes	6752.68	Female total carcass cells	2098.36		FALSE	FALSE	FALSE
Anogam_AGAP011077	-0.499749	0.284955156299885	-1.75377951381694	0.07946829467176	0.173114667038844	Fem.Oenocytes vs Female total carcass cells	Female Oenocytes	6729.69	Female total carcass cells	10172.1	RpS12 40S ribosomal protein S12	FALSE	FALSE	FALSE
Anogam_AGAP005427	-0.886615	0.293715759993999	-3.01861602937703	0.00253932142894228	0.0120066251667918	Fem.Oenocytes vs Female total carcass cells	Female Oenocytes	6724.03	Female total carcass cells	13273	RpL28 60S ribosomal protein L28	FALSE	FALSE	FALSE
Anogam_AGAP011421	2.73712	0.583353734790903	4.6920428795558	2.70490415158434e-06	3.92040400561119e-05	Fem.Oenocytes vs Female total carcass cells	Female Oenocytes	6717.88	Female total carcass cells	1079.54	IQ motif and SEC7 domain-containing protein	TRUE	FALSE	TRUE
Anogam_AGAP008165	2.45859	0.415324906550191	5.91968776428654	3.22553398312925e-09	1.12257359576117e-07	Fem.Oenocytes vs Female total carcass cells	Female Oenocytes	6649.3	Female total carcass cells	1294.86	cellular retinaldehyde binding protein	TRUE	FALSE	TRUE
Anogam_AGAP001730	0.48753	0.239856589092054	2.0325899213434	0.0420939706023422	0.108435424774211	Fem.Oenocytes vs Female total carcass cells	Female Oenocytes	6598.19	Female total carcass cells	5032.68	cyclin G2	FALSE	FALSE	FALSE
Anogam_AGAP010173	-0.820004	0.300080600084004	-2.73261397092359	0.00628339282256362	0.0247085608610573	Fem.Oenocytes vs Female total carcass cells	Female Oenocytes	6561.14	Female total carcass cells	12388.1	Rack1 guanine nucleotide-binding protein subunit beta-like protein	FALSE	FALSE	FALSE
Anogam_AGAP005775	1.48809	0.302486322845265	4.91951391730499	8.67593996780972e-07	1.45767188424678e-05	Fem.Oenocytes vs Female total carcass cells	Female Oenocytes	6560.93	Female total carcass cells	2502.32	Bax inhibitor 1	TRUE	FALSE	TRUE
Anogam_AGAP006745	2.88133	0.444847935909938	6.4771010904065	9.35015534257282e-11	5.035304708695e-09	Fem.Oenocytes vs Female total carcass cells	Female Oenocytes	6521.17	Female total carcass cells	945.807		TRUE	FALSE	TRUE
Anogam_AGAP000964	0.945461	0.583686385704308	1.61980937851018	0.105273231043495	0.213424945519525	Fem.Oenocytes vs Female total carcass cells	Female Oenocytes	6488.74	Female total carcass cells	3598.53		FALSE	FALSE	FALSE
Anogam_AGAP011706	-0.706992	0.292978503680459	-2.41312069239123	0.0158165811312528	0.051241417417894	Fem.Oenocytes vs Female total carcass cells	Female Oenocytes	6474.16	Female total carcass cells	11298.5	RpL27a 60S ribosomal protein L27a	FALSE	FALSE	FALSE
Anogam_AGAP009595	0.748083	0.357975303638915	2.08976118189615	0.0366392579794272	0.0975207196830151	Fem.Oenocytes vs Female total carcass cells	Female Oenocytes	6471.58	Female total carcass cells	4121.35	sodium-potassium-transporting ATPase subunit beta	FALSE	FALSE	FALSE
Anogam_AGAP010714	2.27894	0.634925320073992	3.58930273755274	0.000331563616516784	0.00230316288133044	Fem.Oenocytes vs Female total carcass cells	Female Oenocytes	6468.97	Female total carcass cells	1428.99	very-long-chain enoyl-CoA reductase	FALSE	FALSE	FALSE
Anogam_AGAP004919	-0.643236	0.244022917879536	-2.63596705726775	0.00838978761681929	0.0309126060119895	Fem.Oenocytes vs Female total carcass cells	Female Oenocytes	6463.22	Female total carcass cells	10791.5	RpL15 60S ribosomal protein L15	FALSE	FALSE	FALSE
Anogam_AGAP004212	0.675478	0.322016727592228	2.09764787689974	0.0359362624516768	0.0960553389251717	Fem.Oenocytes vs Female total carcass cells	Female Oenocytes	6436.39	Female total carcass cells	4305.85	Crc calreticulin	FALSE	FALSE	FALSE
Anogam_AGAP009508	-0.43898	0.302895549165604	-1.44927710078572	0.147260213385429	0.272668567383226	Fem.Oenocytes vs Female total carcass cells	Female Oenocytes	6405.05	Female total carcass cells	9282.77	RpL9 60S ribosomal protein L9	FALSE	FALSE	FALSE
Anogam_AGAP006258	3.47483	0.609040591273248	5.70541019280596	1.16063240050338e-08	3.43225165374293e-07	Fem.Oenocytes vs Female total carcass cells	Female Oenocytes	6362.61	Female total carcass cells	611.168	PPO2 prophenoloxidase 2	TRUE	FALSE	TRUE
Anogam_AGAP005160	0.928905	0.318578542000642	2.91578050801378	0.0035480000775651	0.0156479037903647	Fem.Oenocytes vs Female total carcass cells	Female Oenocytes	6346.25	Female total carcass cells	3565.22	Ras homolog gene family2C member A	FALSE	FALSE	FALSE
Anogam_AGAP010331	0.266103	0.21870145640442	1.21673948596882	0.223703350544398	0.368350930603522	Fem.Oenocytes vs Female total carcass cells	Female Oenocytes	6339.22	Female total carcass cells	5637.74	heat shock protein 110kDa	FALSE	FALSE	FALSE
Anogam_AGAP005124	0.510709	0.544240056773463	0.938388354501727	0.34804486843882	0.500950838928189	Fem.Oenocytes vs Female total carcass cells	Female Oenocytes	6335.29	Female total carcass cells	4764.08	Aldehyde dehydrogenase	FALSE	FALSE	FALSE
Anogam_AGAP011777	-0.773003	0.353020208565974	-2.18968519889502	0.0285470752454256	0.0806665766117632	Fem.Oenocytes vs Female total carcass cells	Female Oenocytes	6317.6	Female total carcass cells	11540.4	RpSA 40S ribosomal protein SA	FALSE	FALSE	FALSE
Anogam_AGAP008329	-0.784888	0.286293543929804	-2.74154926185603	0.00611501905028443	0.0242515019079497	Fem.Oenocytes vs Female total carcass cells	Female Oenocytes	6295.09	Female total carcass cells	11589.7	RpS5 40S ribosomal protein S5	FALSE	FALSE	FALSE
Anogam_AGAP004164	0.635584	0.278971120724682	2.27831410377124	0.0227078699528165	0.0677396283840288	Fem.Oenocytes vs Female total carcass cells	Female Oenocytes	6259.58	Female total carcass cells	4309.39	GSTD1-4 glutathione S-transferase delta class 1	FALSE	FALSE	FALSE
Anogam_AGAP007957	1.71865	0.411380471586983	4.17775527795063	2.9440016102953e-05	0.00029982947215342	Fem.Oenocytes vs Female total carcass cells	Female Oenocytes	6253.87	Female total carcass cells	2029.78	choline-ethanolamine kinase	TRUE	FALSE	TRUE
Anogam_AGAP004886	0.90245	0.231569612136323	3.89710017237751	9.73513592089874e-05	0.000820509973168335	Fem.Oenocytes vs Female total carcass cells	Female Oenocytes	6238.93	Female total carcass cells	3570.21	microtubule-associated protein2C RP-EB family	FALSE	FALSE	FALSE
Anogam_AGAP010870	1.89678	0.436717919111208	4.34326309723178	1.40381846119529e-05	0.00016284723338622	Fem.Oenocytes vs Female total carcass cells	Female Oenocytes	6237.37	Female total carcass cells	1794.02	solute carrier family 27 (fatty acid transporter)2C member 1-4	TRUE	FALSE	TRUE
Anogam_AGAP008075	-0.758638	0.305164053373191	-2.48600139214962	0.0129187460227689	0.0436685197571759	Fem.Oenocytes vs Female total carcass cells	Female Oenocytes	6235.77	Female total carcass cells	11273.5	cellular nucleic acid-binding protein	FALSE	FALSE	FALSE
Anogam_AGAP001805	-0.796691	0.294033927186548	-2.70952019687557	0.00673806026360215	0.0261249839398171	Fem.Oenocytes vs Female total carcass cells	Female Oenocytes	6224.72	Female total carcass cells	11557.4	RpL13 60S ribosomal protein L13	FALSE	FALSE	FALSE
Anogam_AGAP004674	-1.42648	0.495504974785099	-2.87883183585901	0.00399151110336746	0.0172762866369103	Fem.Oenocytes vs Female total carcass cells	Female Oenocytes	6222.26	Female total carcass cells	17904.7	Phenoloxidase inhibitor protein	FALSE	FALSE	FALSE
Anogam_AGAP011223	3.76092	0.66940754159626	5.61827996443025	1.92867807992802e-08	5.37717550785382e-07	Fem.Oenocytes vs Female total carcass cells	Female Oenocytes	6167.04	Female total carcass cells	485.573		TRUE	FALSE	TRUE
Anogam_AGAP012422	1.24318	0.280147551166305	4.4375879119717	9.09725711136763e-06	0.000111561889720204	Fem.Oenocytes vs Female total carcass cells	Female Oenocytes	6152.24	Female total carcass cells	2780.99	WNK lysine deficient protein kinase	TRUE	FALSE	TRUE
Anogam_AGAP011824	2.30106	0.565488813945872	4.06915989226697	4.71829602844472e-05	0.000442913807000425	Fem.Oenocytes vs Female total carcass cells	Female Oenocytes	6144.16	Female total carcass cells	1332.55	TPX4 thioredoxin peroxidase 4	TRUE	FALSE	TRUE
Anogam_AGAP005531	2.2011	0.325986665655085	6.75210217783082	1.4571819019593e-11	1.02122501512654e-09	Fem.Oenocytes vs Female total carcass cells	Female Oenocytes	6122.32	Female total carcass cells	1422.94	programmed cell death 6-interacting protein	TRUE	FALSE	TRUE
Anogam_AGAP010933	-0.549755	0.295810129334838	-1.85847372882577	0.0631017707239302	0.14664031752152	Fem.Oenocytes vs Female total carcass cells	Female Oenocytes	6102.46	Female total carcass cells	9544.14	RpS19 40S ribosomal protein S19	FALSE	FALSE	FALSE
Anogam_AGAP028491	-0.171848	0.622409761526517	-0.276100702825944	0.782470720871367	0.859776676971202	Fem.Oenocytes vs Female total carcass cells	Female Oenocytes	6102.29	Female total carcass cells	7362.7	aquaporin	FALSE	FALSE	FALSE
Anogam_AGAP011984	3.41584	0.425813673476424	8.02190496018419	1.04117687897043e-15	2.53650519657748e-13	Fem.Oenocytes vs Female total carcass cells	Female Oenocytes	6070.14	Female total carcass cells	609.48	UDP-N-acetyl-alpha-D-galactosamine-polypeptide N-acetylgalactosaminyltransferase 20	TRUE	FALSE	TRUE
Anogam_AGAP008908	2.0673	0.27312110239945	7.56918414580154	3.75575449977402e-14	6.51336949859114e-12	Fem.Oenocytes vs Female total carcass cells	Female Oenocytes	6068.33	Female total carcass cells	1547.85	actin-related protein 2-3 complex subunit 1A	TRUE	FALSE	TRUE
Anogam_AGAP003304	2.70497	0.369181703932667	7.32692936187069	2.35485863334238e-13	3.12384287641596e-11	Fem.Oenocytes vs Female total carcass cells	Female Oenocytes	6061.75	Female total carcass cells	995.885		TRUE	FALSE	TRUE
Anogam_AGAP010347	1.56899	0.498468402817984	3.14762120948495	0.00164604845541496	0.00846168578638571	Fem.Oenocytes vs Female total carcass cells	Female Oenocytes	6057.84	Female total carcass cells	2186.4	CuSOD3 copper-zinc superoxide dismutase 3	FALSE	FALSE	FALSE
Anogam_AGAP007237	3.82577	0.609343193438689	6.27851758127939	3.41816381883784e-10	1.58975691792495e-08	Fem.Oenocytes vs Female total carcass cells	Female Oenocytes	6036.56	Female total carcass cells	454.993	HPX4 heme peroxidase 4	TRUE	FALSE	TRUE
Anogam_AGAP004784	3.35641	0.627219249165348	5.35125997021118	8.73439360714336e-08	1.96850914952183e-06	Fem.Oenocytes vs Female total carcass cells	Female Oenocytes	6025.83	Female total carcass cells	630.514	fatty acyl-CoA reductase 2	TRUE	FALSE	TRUE
Anogam_AGAP006766	-0.468384	0.229757882493808	-2.03859786722158	0.0414901782754316	0.107258085930828	Fem.Oenocytes vs Female total carcass cells	Female Oenocytes	6025.8	Female total carcass cells	8913.84	nascent polypeptide-associated complex subunit alpha	FALSE	FALSE	FALSE
Anogam_AGAP013186	1.91085	0.36833434755254	5.18782284087776	2.12766863844251e-07	4.28549321034327e-06	Fem.Oenocytes vs Female total carcass cells	Female Oenocytes	5994.28	Female total carcass cells	1706.86		TRUE	FALSE	TRUE
Anogam_AGAP005625	1.26204	0.694089666856631	1.8182720956591	0.0690225555350082	0.156524554129921	Fem.Oenocytes vs Female total carcass cells	Female Oenocytes	5966.1	Female total carcass cells	2655.49	SCRASP1 Class A Scavenger Receptor (SRCR domain) with Serine Protease domain.	FALSE	FALSE	FALSE
Anogam_AGAP009537	-0.536055	0.344514934274102	-1.55596896761538	0.119715471795465	0.234584131923599	Fem.Oenocytes vs Female total carcass cells	Female Oenocytes	5955.17	Female total carcass cells	9237.32	cytochrome c	FALSE	FALSE	FALSE
Anogam_AGAP013202	0.769674	0.594259807523382	1.29518148162015	0.195257631502061	0.333377280728761	Fem.Oenocytes vs Female total carcass cells	Female Oenocytes	5938.26	Female total carcass cells	3722.25		FALSE	FALSE	FALSE
Anogam_AGAP012515	-0.196339	0.29958004280334	-0.655381036064804	0.512222458127711	0.651873158154569	Fem.Oenocytes vs Female total carcass cells	Female Oenocytes	5936.09	Female total carcass cells	7276.55	F-type H+-transporting ATPase subunit f	FALSE	FALSE	FALSE
Anogam_AGAP004655	1.68782	0.63589006091917	2.65426300447848	0.00794818502237787	0.0296809595434198	Fem.Oenocytes vs Female total carcass cells	Female Oenocytes	5914.33	Female total carcass cells	1967.36		FALSE	FALSE	FALSE
Anogam_AGAP008822	1.64254	0.500732666732489	3.28027492563113	0.00103705974662416	0.00582712538575421	Fem.Oenocytes vs Female total carcass cells	Female Oenocytes	5914.11	Female total carcass cells	2028.54	FK506-binding protein 14	FALSE	FALSE	FALSE
Anogam_AGAP007629	3.20619	0.591568562313452	5.41980535413968	5.96639601473922e-08	1.41972474471655e-06	Fem.Oenocytes vs Female total carcass cells	Female Oenocytes	5899.3	Female total carcass cells	682.267	LANB2 laminin gamma 1	TRUE	FALSE	TRUE
Anogam_AGAP001459	-0.671956	0.280267971060846	-2.39755007556473	0.0165051247818116	0.0529239851982127	Fem.Oenocytes vs Female total carcass cells	Female Oenocytes	5895.91	Female total carcass cells	10041.5	RpL17 60S ribosomal protein L17	FALSE	FALSE	FALSE
Anogam_AGAP028064	3.48504	0.460960303000584	7.56039511723362	4.01846798224156e-14	6.63176845069284e-12	Fem.Oenocytes vs Female total carcass cells	Female Oenocytes	5856.09	Female total carcass cells	559.01	LRIM16B leucine-rich immune protein (TM)	TRUE	FALSE	TRUE
Anogam_AGAP009075	-0.473642	0.2613540293339	-1.81226201705663	0.0699457205178367	0.157813585962184	Fem.Oenocytes vs Female total carcass cells	Female Oenocytes	5846.62	Female total carcass cells	8672.62	ATP-dependent RNA helicase UAP56-SUB2	FALSE	FALSE	FALSE
Anogam_AGAP010133	1.77719	0.414384931432519	4.28875165944131	1.79680135524031e-05	0.000198540728583357	Fem.Oenocytes vs Female total carcass cells	Female Oenocytes	5840.09	Female total carcass cells	1821.42	SCRPQ2 Class B Scavenger Receptor (CD36 domain).	TRUE	FALSE	TRUE
Anogam_AGAP009623	-0.527682	0.437410958807684	-1.20637566235057	0.227672675751931	0.372787136868901	Fem.Oenocytes vs Female total carcass cells	Female Oenocytes	5814.77	Female total carcass cells	8978.51	GAPDH glyceraldehyde 3-phosphate dehydrogenase	FALSE	FALSE	FALSE
Anogam_AGAP010249	2.30572	0.395931823206937	5.82352858726727	5.76179532892144e-09	1.86460120970439e-07	Fem.Oenocytes vs Female total carcass cells	Female Oenocytes	5741.77	Female total carcass cells	1243.88	Cation chloride cotransporter	TRUE	FALSE	TRUE
Anogam_AGAP011298	-0.672729	0.285215055555284	-2.35867386892465	0.0183403659604199	0.0575457347593341	Fem.Oenocytes vs Female total carcass cells	Female Oenocytes	5724.2	Female total carcass cells	9757.74	RpL10a 60S ribosomal protein L10a	FALSE	FALSE	FALSE
Anogam_AGAP008851	3.97095	0.588407505786898	6.74864745848869	1.49229688694836e-11	1.03871984675208e-09	Fem.Oenocytes vs Female total carcass cells	Female Oenocytes	5690.23	Female total carcass cells	387.445	E3 ubiquitin-protein ligase mind-bomb	TRUE	FALSE	TRUE
Anogam_AGAP009493	3.68078	0.542822025723244	6.78082667264101	1.19490164219539e-11	8.73302400210232e-10	Fem.Oenocytes vs Female total carcass cells	Female Oenocytes	5663.58	Female total carcass cells	472.382	alpha9 nicotinic acetylcholine receptor subunit alpha 9	TRUE	FALSE	TRUE
Anogam_AGAP000565	1.12017	0.323371093884801	3.46403140401082	0.000532144382651669	0.00337145592773491	Fem.Oenocytes vs Female total carcass cells	Female Oenocytes	5662.03	Female total carcass cells	2781.35	TRXR thioredoxin reductase	FALSE	FALSE	FALSE
Anogam_AGAP000952	-0.840471	0.264789650122338	-3.17410700696603	0.00150298269423066	0.00786309053231487	Fem.Oenocytes vs Female total carcass cells	Female Oenocytes	5652.98	Female total carcass cells	10814.6	RpL37 60S ribosomal protein L37	FALSE	FALSE	FALSE
Anogam_AGAP005046	-0.589915	0.298626559702085	-1.97542728122928	0.0482196793874543	0.119695235199523	Fem.Oenocytes vs Female total carcass cells	Female Oenocytes	5637.43	Female total carcass cells	9070.09	RpL22 60S ribosomal protein L22	FALSE	FALSE	FALSE
Anogam_AGAP001274	-0.588244	0.279604513823959	-2.10384397155488	0.0353920597089237	0.0950476522156711	Fem.Oenocytes vs Female total carcass cells	Female Oenocytes	5610.37	Female total carcass cells	9014.8	RpS15 40S ribosomal protein S15	FALSE	FALSE	FALSE
Anogam_AGAP010608	2.09258	0.388719314297569	5.38326355015732	7.31473154849349e-08	1.69715041279332e-06	Fem.Oenocytes vs Female total carcass cells	Female Oenocytes	5591.28	Female total carcass cells	1404.54	Clathrin light chain	TRUE	FALSE	TRUE
Anogam_AGAP010310	0.117624	0.208220057636671	0.564903688122099	0.572139274979524	0.701009347574002	Fem.Oenocytes vs Female total carcass cells	Female Oenocytes	5589.65	Female total carcass cells	5508.89	eukaryotic peptide chain release factor subunit	FALSE	FALSE	FALSE
Anogam_AGAP006068	2.38616	0.307132097862888	7.76916728086081	7.9003775638278e-15	1.55455121602089e-12	Fem.Oenocytes vs Female total carcass cells	Female Oenocytes	5586.8	Female total carcass cells	1143.09		TRUE	FALSE	TRUE
Anogam_AGAP004247	1.75441	0.262517356622122	6.68302869278752	2.34053725982801e-11	1.5351523873436e-09	Fem.Oenocytes vs Female total carcass cells	Female Oenocytes	5530.81	Female total carcass cells	1753.23	GPXH1 glutathione peroxidase 1	TRUE	FALSE	TRUE
Anogam_AGAP005985	3.04689	0.702478731384428	4.33734572206792	1.44213692713899e-05	0.000166853906483549	Fem.Oenocytes vs Female total carcass cells	Female Oenocytes	5522.98	Female total carcass cells	716.895	fatty acyl-CoA reductase 2	TRUE	FALSE	TRUE
Anogam_AGAP011805	-1.17903	0.283729356760101	-4.1554796678024	3.24605812122852e-05	0.000324986953976616	Fem.Oenocytes vs Female total carcass cells	Female Oenocytes	5461.18	Female total carcass cells	13223.8	ornithine decarboxylase	FALSE	TRUE	TRUE
Anogam_AGAP007927	-0.700392	0.289195062743776	-2.4218670929686	0.0154409967136327	0.0502200503413509	Fem.Oenocytes vs Female total carcass cells	Female Oenocytes	5445.23	Female total carcass cells	9457.9	RpL40 60S ribosomal protein L40	FALSE	FALSE	FALSE
Anogam_AGAP029078	-0.000535371	0.305584351326856	-0.00175195976941458	0.998602139063927	0.999090357573296	Fem.Oenocytes vs Female total carcass cells	Female Oenocytes	5410.41	Female total carcass cells	5783.5		FALSE	FALSE	FALSE
Anogam_AGAP007347	3.63071	1.66509719962498	2.18047726183405	NA	NA	Fem.Oenocytes vs Female total carcass cells	Female Oenocytes	5399.39	Female total carcass cells	464.553	LYSC1 C-type lysozyme	FALSE	FALSE	FALSE
Anogam_AGAP010216	-0.623249	0.295685720735583	-2.10780933949786	0.0350474846745037	0.0942707316481393	Fem.Oenocytes vs Female total carcass cells	Female Oenocytes	5391.75	Female total carcass cells	8877.83	RpL25 60S ribosomal protein L25	FALSE	FALSE	FALSE
Anogam_AGAP004039	1.61444	0.626372961102921	2.57744491173264	0.00995337454589025	0.0354113102759211	Fem.Oenocytes vs Female total carcass cells	Female Oenocytes	5388.02	Female total carcass cells	1886.14	afadin	FALSE	FALSE	FALSE
Anogam_AGAP009569	2.06789	0.355118005147024	5.82309513577655	5.77676488933045e-09	1.86460120970439e-07	Fem.Oenocytes vs Female total carcass cells	Female Oenocytes	5384.56	Female total carcass cells	1372.07	syntenin-1 isoform 1	TRUE	FALSE	TRUE
Anogam_AGAP011802	-0.873535	0.296846024571353	-2.94271970538194	0.00325342838480437	0.0146132920251617	Fem.Oenocytes vs Female total carcass cells	Female Oenocytes	5370.19	Female total carcass cells	10514.4	RpL39 60S ribosomal protein L39	FALSE	FALSE	FALSE
Anogam_AGAP001093	2.20163	0.255325847886878	8.62283649232363	6.53156856771022e-18	3.18242902784814e-15	Fem.Oenocytes vs Female total carcass cells	Female Oenocytes	5359.76	Female total carcass cells	1245.69	fos-like antigen2C invertebrate	TRUE	FALSE	TRUE
Anogam_AGAP001652	2.01631	0.688099927249397	2.93025254997425	0.00338686619437016	0.015106545292413	Fem.Oenocytes vs Female total carcass cells	Female Oenocytes	5346.6	Female total carcass cells	1411.01	lipase	FALSE	FALSE	FALSE
Anogam_AGAP001903	-0.43976	0.384420795983752	-1.14395579261823	0.252641971007708	0.401058527009562	Fem.Oenocytes vs Female total carcass cells	Female Oenocytes	5345.68	Female total carcass cells	7758.91	Mdh2 NAD-dependent malate dehydrogenase	FALSE	FALSE	FALSE
Anogam_AGAP003879	1.25375	0.443523651625327	2.8267889902271	0.00470172982929986	0.0196761143613072	Fem.Oenocytes vs Female total carcass cells	Female Oenocytes	5319.06	Female total carcass cells	2388.89	VhaAC45 vacuolar H+ ATPase AC45 accessory subunit	FALSE	FALSE	FALSE
Anogam_AGAP001069	0.84518	0.334597385418769	2.52596021369093	0.0115382547456909	0.0398445570563311	Fem.Oenocytes vs Female total carcass cells	Female Oenocytes	5236.8	Female total carcass cells	3120.63		FALSE	FALSE	FALSE
Anogam_AGAP004431	2.28232	0.234513621973783	9.73216278791974	2.19867619314596e-22	3.21383640118135e-19	Fem.Oenocytes vs Female total carcass cells	Female Oenocytes	5209.25	Female total carcass cells	1145.42		TRUE	FALSE	TRUE
Anogam_AGAP009998	-0.672206	0.284541184280743	-2.36241924343055	0.0181560966759391	0.0570443790975619	Fem.Oenocytes vs Female total carcass cells	Female Oenocytes	5195.06	Female total carcass cells	8853.13	RpS11 40S ribosomal protein S11	FALSE	FALSE	FALSE
Anogam_AGAP010514	1.20438	0.295422857129453	4.07681650517671	4.56564942556054e-05	0.000429767478586342	Fem.Oenocytes vs Female total carcass cells	Female Oenocytes	5181.5	Female total carcass cells	2403.66	activator of 90 kDa heat shock protein ATPase	TRUE	FALSE	TRUE
Anogam_AGAP003759	3.54067	0.445113298574719	7.95453009396968	1.79812663479958e-15	3.99965907114549e-13	Fem.Oenocytes vs Female total carcass cells	Female Oenocytes	5154.08	Female total carcass cells	474.836	juvenile hormone-inducible protein	TRUE	FALSE	TRUE
Anogam_AGAP001064	1.52989	0.235103569578339	6.50730191765474	7.65125401140429e-11	4.23176384025345e-09	Fem.Oenocytes vs Female total carcass cells	Female Oenocytes	5138.98	Female total carcass cells	1903.74	Transmembrane emp24 domain-containing protein 10 precursor	TRUE	FALSE	TRUE
Anogam_AGAP013509	3.59436	0.58730976738454	6.1200482490676	9.35470275702696e-10	3.7705395572097e-08	Fem.Oenocytes vs Female total carcass cells	Female Oenocytes	5135.02	Female total carcass cells	454.541	carboxylesterase clade H2C member 1	TRUE	FALSE	TRUE
Anogam_AGAP001097	3.83997	0.748999436963628	5.12679949171469	2.9470908734798e-07	5.65752979689406e-06	Fem.Oenocytes vs Female total carcass cells	Female Oenocytes	5098.81	Female total carcass cells	381.837	Elongation of very long chain fatty acids protein	TRUE	FALSE	TRUE
Anogam_AGAP003057	0.835628	0.421369959352359	1.98312148035821	0.047353861780561	0.118176759448463	Fem.Oenocytes vs Female total carcass cells	Female Oenocytes	5067.44	Female total carcass cells	3039.18	CLIPB8 CLIP-domain serine protease	FALSE	FALSE	FALSE
Anogam_AGAP003767	0.948045	0.440705256258393	2.15119932944287	0.0314604699512509	0.0866263532134552	Fem.Oenocytes vs Female total carcass cells	Female Oenocytes	5053.25	Female total carcass cells	2803.55		FALSE	FALSE	FALSE
Anogam_AGAP005929	1.18056	0.347419826097266	3.39807058806547	0.000678629075416116	0.00413563591403079	Fem.Oenocytes vs Female total carcass cells	Female Oenocytes	5039.04	Female total carcass cells	2377.19	pyridoxine kinase	FALSE	FALSE	FALSE
Anogam_AGAP010164	0.908979	0.337834488273666	2.69060440715228	0.0071322713405187	0.0273426003582568	Fem.Oenocytes vs Female total carcass cells	Female Oenocytes	5029.78	Female total carcass cells	2867.18	whd protein withered2C carnitine O-palmitoyltransferase	FALSE	FALSE	FALSE
Anogam_AGAP002056	3.14473	0.51869580555417	6.06275525757131	1.33809203390435e-09	5.20583942620127e-08	Fem.Oenocytes vs Female total carcass cells	Female Oenocytes	5026.4	Female total carcass cells	609.36	Beta-galactosidase	TRUE	FALSE	TRUE
Anogam_AGAP011369	-2.24863	0.401182254220181	-5.60501126638516	2.08241418442273e-08	5.69712885962926e-07	Fem.Oenocytes vs Female total carcass cells	Female Oenocytes	5022.43	Female total carcass cells	25520.8	gelsolin	FALSE	TRUE	TRUE
Anogam_AGAP011172	0.536976	0.497509799955965	1.07932705762522	0.280441955024976	0.430965871514973	Fem.Oenocytes vs Female total carcass cells	Female Oenocytes	5010.95	Female total carcass cells	3695.32	cystathionine gamma-lyase	FALSE	FALSE	FALSE
Anogam_AGAP009850	1.11491	0.397783972099183	2.80280575006765	0.00506601717955356	0.0208929817739589	Fem.Oenocytes vs Female total carcass cells	Female Oenocytes	5002.85	Female total carcass cells	2473.91	ABCG7 ATP-binding cassette transporter (ABC transporter) family G member 7	FALSE	FALSE	FALSE
Anogam_AGAP008860	1.48016	0.342389664453624	4.3230263608146	1.53903336296846e-05	0.000177135988412748	Fem.Oenocytes vs Female total carcass cells	Female Oenocytes	4994.27	Female total carcass cells	1915.19		TRUE	FALSE	TRUE
Anogam_AGAP007651	-0.379726	0.462966841454815	-0.82020180357285	0.412101073979384	0.56311674532012	Fem.Oenocytes vs Female total carcass cells	Female Oenocytes	4979.29	Female total carcass cells	6931.79	growth arrest and DNA-damage-inducible protein	FALSE	FALSE	FALSE
Anogam_AGAP009110	-2.61041	0.693593900800095	-3.76360036301399	0.000167484464466773	0.00128849702287521	Fem.Oenocytes vs Female total carcass cells	Female Oenocytes	4978.74	Female total carcass cells	32423.9		FALSE	FALSE	FALSE
Anogam_AGAP002878	2.18503	0.38276738828933	5.70850164268539	1.13975078279463e-08	3.39997959462235e-07	Fem.Oenocytes vs Female total carcass cells	Female Oenocytes	4964.48	Female total carcass cells	1166.84	Cystatin-like protein	TRUE	FALSE	TRUE
Anogam_AGAP002754	-0.693815	0.266469479740436	-2.60373312179849	0.00922145310260639	0.0333241809300132	Fem.Oenocytes vs Female total carcass cells	Female Oenocytes	4935.6	Female total carcass cells	8536.92	RpL35a 60S ribosomal protein L35a	FALSE	FALSE	FALSE
Anogam_AGAP005131	-0.405908	0.314367060298443	-1.29119098793335	0.196637459329712	0.335164831561155	Fem.Oenocytes vs Female total carcass cells	Female Oenocytes	4934.26	Female total carcass cells	6991.04	RpS24 40S ribosomal protein S24	FALSE	FALSE	FALSE
Anogam_AGAP004533	0.388119	0.350871900540544	1.1061568443599	0.268658638258142	0.417514457268728	Fem.Oenocytes vs Female total carcass cells	Female Oenocytes	4928.15	Female total carcass cells	4030.61	cathepsin B	FALSE	FALSE	FALSE
Anogam_AGAP011687	-0.847982	0.248877703658544	-3.40722504880284	0.000656269916159478	0.0040305845030875	Fem.Oenocytes vs Female total carcass cells	Female Oenocytes	4909.47	Female total carcass cells	9446.79	RpL27 60S ribosomal protein L27	FALSE	FALSE	FALSE
Anogam_AGAP010175	1.62208	0.353316674560755	4.59100195865343	4.41123196680405e-06	5.98617048863913e-05	Fem.Oenocytes vs Female total carcass cells	Female Oenocytes	4904.43	Female total carcass cells	1704.32	adenylyl cyclase-associated protein 1	TRUE	FALSE	TRUE
Anogam_AGAP003711	1.25821	0.330486553051174	3.8071519386817	0.000140576385090163	0.00111502137383143	Fem.Oenocytes vs Female total carcass cells	Female Oenocytes	4897.04	Female total carcass cells	2191	V-type H+-transporting ATPase subunit I	FALSE	FALSE	FALSE
Anogam_AGAP028389	-0.167747	0.332286165393894	-0.504828393710685	0.61367937123609	0.733709624855751	Fem.Oenocytes vs Female total carcass cells	Female Oenocytes	4889.48	Female total carcass cells	5875.71	ND1 NADH dehydrogenase subunit 1	FALSE	FALSE	FALSE
Anogam_AGAP009324	-0.586821	0.276860618863816	-2.11955236335262	0.0340438134014487	0.0921768453886273	Fem.Oenocytes vs Female total carcass cells	Female Oenocytes	4884.24	Female total carcass cells	7843.69	RpL34 60S ribosomal protein L34	FALSE	FALSE	FALSE
Anogam_AGAP010163	-0.566031	0.30752006166283	-1.84063208696309	0.0656754922895796	0.150569490725292	Fem.Oenocytes vs Female total carcass cells	Female Oenocytes	4870.93	Female total carcass cells	7713.11	RpL38 60S ribosomal protein L38	FALSE	FALSE	FALSE
Anogam_AGAP004819	0.561696	0.321997311560871	1.74441322804129	0.0810870600390635	0.175747102592707	Fem.Oenocytes vs Female total carcass cells	Female Oenocytes	4863.52	Female total carcass cells	3526.77	receptor expression-enhancing protein 5	FALSE	FALSE	FALSE
Anogam_AGAP009156	2.1936	0.417283907535594	5.25685448318393	1.46540171050532e-07	3.06625568545817e-06	Fem.Oenocytes vs Female total carcass cells	Female Oenocytes	4859.02	Female total carcass cells	1137.93		TRUE	FALSE	TRUE
Anogam_AGAP007055	0.743801	0.266897787161806	2.78683838334129	0.0053225016572128	0.0217404538748908	Fem.Oenocytes vs Female total carcass cells	Female Oenocytes	4858.32	Female total carcass cells	3103.63	sodium-dependent dicarboxylate transporter sdcS	FALSE	FALSE	FALSE
Anogam_AGAP007131	2.13619	0.319199674671516	6.69231761600937	2.19663441369491e-11	1.47868179742937e-09	Fem.Oenocytes vs Female total carcass cells	Female Oenocytes	4823.22	Female total carcass cells	1174.9	AP-2 complex subunit mu-1	TRUE	FALSE	TRUE
Anogam_AGAP008667	2.04519	0.564013418140346	3.62613020058713	0.000287700333859502	0.00203578825453003	Fem.Oenocytes vs Female total carcass cells	Female Oenocytes	4802.13	Female total carcass cells	1246.89	Hydroxysteroid (17-beta) dehydrogenase 4	FALSE	FALSE	FALSE
Anogam_AGAP003538	-0.761077	0.306327410970402	-2.48452165469201	0.0129725617987079	0.043821476501941	Fem.Oenocytes vs Female total carcass cells	Female Oenocytes	4785.55	Female total carcass cells	8672.93	RpL36a 60S ribosomal protein L36a	FALSE	FALSE	FALSE
Anogam_AGAP005512	2.91734	0.757491170278504	3.85132223803513	0.000117481791825684	0.000957065042962105	Fem.Oenocytes vs Female total carcass cells	Female Oenocytes	4785.36	Female total carcass cells	680.063	Elongation of very long chain fatty acids protein	TRUE	FALSE	TRUE
Anogam_AGAP009920	-0.591582	0.279895206246761	-2.11358345692864	0.034550860028075	0.0931798628906862	Fem.Oenocytes vs Female total carcass cells	Female Oenocytes	4758.09	Female total carcass cells	7664.54	RpL37a 60S ribosomal protein L37a	FALSE	FALSE	FALSE
Anogam_AGAP003720	1.06226	0.313033445946297	3.39343112217042	0.000690229140247681	0.00419882554281467	Fem.Oenocytes vs Female total carcass cells	Female Oenocytes	4751.09	Female total carcass cells	2430.86	annexin A4	FALSE	FALSE	FALSE
Anogam_AGAP000804	2.89277	0.340232598912378	8.50231868021552	1.85840796385106e-17	8.26749142874957e-15	Fem.Oenocytes vs Female total carcass cells	Female Oenocytes	4724.57	Female total carcass cells	680.847	GPXH2 glutathione peroxidase 2	TRUE	FALSE	TRUE
Anogam_AGAP004458	0.689294	0.349231610788141	1.97374565019322	0.0484106715875225	0.119936559729668	Fem.Oenocytes vs Female total carcass cells	Female Oenocytes	4698.92	Female total carcass cells	3119.14	Leucine-rich repeat-containing protein 58	FALSE	FALSE	FALSE
Anogam_AGAP000462	-0.753361	0.211332231763903	-3.56481940070675	0.000364106812594253	0.00248369393764293	Fem.Oenocytes vs Female total carcass cells	Female Oenocytes	4698.55	Female total carcass cells	8466.34	peptidyl-prolyl isomerase F (cyclophilin D)	FALSE	FALSE	FALSE
Anogam_AGAP011166	0.562257	0.336251748561792	1.67213006560497	0.0944986771175614	0.196127883218436	Fem.Oenocytes vs Female total carcass cells	Female Oenocytes	4690.9	Female total carcass cells	3397.22	protein phosphatase 12C catalytic subunit	FALSE	FALSE	FALSE
Anogam_AGAP005611	0.660981	0.584757490396537	1.13035081751202	0.258328429417584	0.406732453735177	Fem.Oenocytes vs Female total carcass cells	Female Oenocytes	4684.19	Female total carcass cells	3163.18		FALSE	FALSE	FALSE
Anogam_AGAP005933	1.32351	0.349435515272611	3.78756805333917	0.000152129024721481	0.00119004906800474	Fem.Oenocytes vs Female total carcass cells	Female Oenocytes	4677.87	Female total carcass cells	1998.04	NFkappaB essential modulator	FALSE	FALSE	FALSE
Anogam_AGAP007921	1.23019	0.449629332743167	2.73600513452016	0.00621900556362947	0.0245246554848486	Fem.Oenocytes vs Female total carcass cells	Female Oenocytes	4671.7	Female total carcass cells	2133.22	sterol carrier protein 2	FALSE	FALSE	FALSE
Anogam_AGAP009031	-0.777164	0.284105321071245	-2.7354800071376	0.00622893700759118	0.0245415800776561	Fem.Oenocytes vs Female total carcass cells	Female Oenocytes	4668.84	Female total carcass cells	8555.93	RpL5 60S ribosomal protein L5	FALSE	FALSE	FALSE
Anogam_AGAP010392	2.41777	0.343560299638107	7.0374101492663	1.95845741349186e-12	1.84889392188472e-10	Fem.Oenocytes vs Female total carcass cells	Female Oenocytes	4666.41	Female total carcass cells	933.414	calumenin	TRUE	FALSE	TRUE
Anogam_AGAP010592	-0.710974	0.291791927430111	-2.4365799040707	0.0148268932964857	0.0485934568256378	Fem.Oenocytes vs Female total carcass cells	Female Oenocytes	4664	Female total carcass cells	8163.71	S7 40S ribosomal protein S7	FALSE	FALSE	FALSE
Anogam_AGAP003814	2.31929	0.653247240877417	3.55040833776183	0.000384634051711582	0.00259773968126265	Fem.Oenocytes vs Female total carcass cells	Female Oenocytes	4656.62	Female total carcass cells	999.969	very-long-chain (3R)-3-hydroxyacyl-(acyl-carrier protein) dehydratase	FALSE	FALSE	FALSE
Anogam_AGAP000321	3.06372	0.5354918731898	5.72132304585192	1.05697706584759e-08	3.19026234151993e-07	Fem.Oenocytes vs Female total carcass cells	Female Oenocytes	4653.06	Female total carcass cells	594.001		TRUE	FALSE	TRUE
Anogam_AGAP001910	-0.795861	0.30287144468323	-2.62772026132193	0.00859591718686297	0.0315358281305063	Fem.Oenocytes vs Female total carcass cells	Female Oenocytes	4651.71	Female total carcass cells	8636.32	RpS3 40S ribosomal protein S3	FALSE	FALSE	FALSE
Anogam_AGAP029055	3.50604	0.561899964401322	6.23961652155347	4.38644903586811e-10	1.91804045021378e-08	Fem.Oenocytes vs Female total carcass cells	Female Oenocytes	4625.63	Female total carcass cells	435.287		TRUE	FALSE	TRUE
Anogam_AGAP001713	-1.51279	0.529957675312874	-2.85454521130922	0.00430984968217909	0.0183361255501274	Fem.Oenocytes vs Female total carcass cells	Female Oenocytes	4618.39	Female total carcass cells	14110.9	stearoyl-CoA desaturase (delta-9 desaturase)	FALSE	FALSE	FALSE
Anogam_AGAP013005	-2.70189	0.668205537938318	-4.04350822392171	5.26573083344026e-05	0.000487142669152248	Fem.Oenocytes vs Female total carcass cells	Female Oenocytes	4607.68	Female total carcass cells	31961.7		FALSE	TRUE	TRUE
Anogam_AGAP006645	0.351864	0.597559222868024	0.588835241724788	0.555971802402736	0.689205655704482	Fem.Oenocytes vs Female total carcass cells	Female Oenocytes	4605.98	Female total carcass cells	3865.93		FALSE	FALSE	FALSE
Anogam_AGAP011870	3.06383	0.556554143736411	5.50500442245628	3.69159002136281e-08	9.37279133959908e-07	Fem.Oenocytes vs Female total carcass cells	Female Oenocytes	4598	Female total carcass cells	589.345	MMP2 matrix metalloprotease 2	TRUE	FALSE	TRUE
Anogam_AGAP008985	0.159919	0.289267190803433	0.552841939140714	0.580371647679394	0.707116301387896	Fem.Oenocytes vs Female total carcass cells	Female Oenocytes	4583.92	Female total carcass cells	4390.76	DnaJ homolog subfamily C member 7	FALSE	FALSE	FALSE
Anogam_AGAP010929	-0.736953	0.227054228121411	-3.24571400696411	0.00117156470458526	0.00642623716631955	Fem.Oenocytes vs Female total carcass cells	Female Oenocytes	4556.51	Female total carcass cells	8113.71	tubB tubulin beta-chain	FALSE	FALSE	FALSE
Anogam_AGAP003412	-0.650421	0.300126719770401	-2.1671554896649	0.0302230000077543	0.0838962038121062	Fem.Oenocytes vs Female total carcass cells	Female Oenocytes	4539.26	Female total carcass cells	7617.36	RpS28 40S ribosomal protein S28	FALSE	FALSE	FALSE
Anogam_AGAP010160	1.46109	0.649481142102314	2.24963097762358	0.024472380320754	0.071732032117544	Fem.Oenocytes vs Female total carcass cells	Female Oenocytes	4538.67	Female total carcass cells	1759.64	myosin I	FALSE	FALSE	FALSE
Anogam_AGAP004960	1.31833	0.397987379962297	3.31249549532859	0.000924676151395208	0.00533631493574493	Fem.Oenocytes vs Female total carcass cells	Female Oenocytes	4521.71	Female total carcass cells	1941.18	Prosalpha3 26S proteasome alpha 3 subunit	FALSE	FALSE	FALSE
Anogam_AGAP005674	3.18742	0.262515429234449	12.141833126567	6.33897702515216e-34	2.16201376404523e-30	Fem.Oenocytes vs Female total carcass cells	Female Oenocytes	4511.33	Female total carcass cells	530.189	Miple	TRUE	FALSE	TRUE
Anogam_AGAP003475	2.56906	0.232645296968969	11.0427987634823	2.37517621798142e-28	4.86056061247717e-25	Fem.Oenocytes vs Female total carcass cells	Female Oenocytes	4477.42	Female total carcass cells	807.021	leucyl aminopeptidase	TRUE	FALSE	TRUE
Anogam_AGAP008718	2.43236	0.388809932668984	6.25590943249969	3.95206056769811e-10	1.76582898378546e-08	Fem.Oenocytes vs Female total carcass cells	Female Oenocytes	4465.57	Female total carcass cells	885.884	solute carrier family 9 (sodium-hydrogen exchanger)2C member 6-7	TRUE	FALSE	TRUE
Anogam_AGAP001648	4.29638	0.957409048680008	4.48750282731805	NA	NA	Fem.Oenocytes vs Female total carcass cells	Female Oenocytes	4443.2	Female total carcass cells	241.214	CLIPB17 CLIP-domain serine protease	FALSE	FALSE	FALSE
Anogam_AGAP008412	3.25703	0.383434411186229	8.49436247662518	1.99022287210232e-17	8.48498351139622e-15	Fem.Oenocytes vs Female total carcass cells	Female Oenocytes	4418.88	Female total carcass cells	494.093	ubiquitin thioesterase CYLD	TRUE	FALSE	TRUE
Anogam_AGAP010172	0.633207	0.235215759812042	2.69202627632389	0.00710193496083408	0.0272467186048948	Fem.Oenocytes vs Female total carcass cells	Female Oenocytes	4410.58	Female total carcass cells	3041.35	protein phosphatase 2 (formerly 2A)2C catalytic subunit	FALSE	FALSE	FALSE
Anogam_AGAP008432	-1.07422	0.289001631921256	-3.71700126701573	0.000201601432739609	0.00150239319722628	Fem.Oenocytes vs Female total carcass cells	Female Oenocytes	4407.41	Female total carcass cells	9917.36		FALSE	FALSE	FALSE
Anogam_AGAP001826	-1.30304	0.380507103489488	-3.42448480807777	0.000615966282493466	0.00380880161171978	Fem.Oenocytes vs Female total carcass cells	Female Oenocytes	4394.94	Female total carcass cells	11597.7	Lp lipophorin	FALSE	FALSE	FALSE
Anogam_AGAP001697	1.51078	0.451337564253467	3.34733481877513	0.000815925973408642	0.0047925112284255	Fem.Oenocytes vs Female total carcass cells	Female Oenocytes	4394.14	Female total carcass cells	1651.36	20S proteasome subunit beta 3	FALSE	FALSE	FALSE
Anogam_AGAP012014	0.969456	0.345091939681892	2.8092696683728	0.00496540354678655	0.0206025989824493	Fem.Oenocytes vs Female total carcass cells	Female Oenocytes	4389.37	Female total carcass cells	2397.97	Arf1 ADP-ribosylation factor 1	FALSE	FALSE	FALSE
Anogam_AGAP004362	0.584758	0.402853452998103	1.45153992527239	0.146629573156157	0.271845224231527	Fem.Oenocytes vs Female total carcass cells	Female Oenocytes	4385.32	Female total carcass cells	3126.56	glutamate dehydrogenase (NAD(P)+)	FALSE	FALSE	FALSE
Anogam_AGAP010087	1.57146	0.405498723602243	3.87536590744359	0.000106464595605765	0.000884209206362164	Fem.Oenocytes vs Female total carcass cells	Female Oenocytes	4380.21	Female total carcass cells	1578.17	phosphatidylinositol-binding clathrin assembly protein	TRUE	FALSE	TRUE
Anogam_AGAP001718	0.883221	0.673246179780809	1.31188462005419	0.189559067578776	0.326591288035182	Fem.Oenocytes vs Female total carcass cells	Female Oenocytes	4371.5	Female total carcass cells	2531.46		FALSE	FALSE	FALSE
Anogam_AGAP012418	-0.288367	0.337592905568388	-0.854184234264179	0.393002917216484	0.544657435860635	Fem.Oenocytes vs Female total carcass cells	Female Oenocytes	4369.71	Female total carcass cells	5711.06		FALSE	FALSE	FALSE
Anogam_AGAP005813	1.08257	0.375973451298788	2.8793898503131	0.00398445456945313	0.0172676574140806	Fem.Oenocytes vs Female total carcass cells	Female Oenocytes	4333.86	Female total carcass cells	2190.89	FeS cluster assembly scaffold IscU	FALSE	FALSE	FALSE
Anogam_AGAP002239	1.89424	0.445600897691566	4.25098459913086	2.1283280440513e-05	0.000228270991055901	Fem.Oenocytes vs Female total carcass cells	Female Oenocytes	4331.43	Female total carcass cells	1247.34	Diamine acetyltransferase 1	TRUE	FALSE	TRUE
Anogam_AGAP008737	2.34519	0.538078542386337	4.35845644891071	1.30982980281313e-05	0.000153518654551935	Fem.Oenocytes vs Female total carcass cells	Female Oenocytes	4330.24	Female total carcass cells	910.034	cytohesin-1	TRUE	FALSE	TRUE
Anogam_AGAP028154	0.334404	0.232170330789962	1.44033720546943	0.149772020081246	0.275650022193408	Fem.Oenocytes vs Female total carcass cells	Female Oenocytes	4328.95	Female total carcass cells	3670.9	V-type proton ATPase proteolipid subunit	FALSE	FALSE	FALSE
Anogam_AGAP011896	-0.709842	0.273781171314915	-2.59273325673857	0.00952165885218141	0.0341867358979749	Fem.Oenocytes vs Female total carcass cells	Female Oenocytes	4328.64	Female total carcass cells	7567.61	RpL31 60S ribosomal protein L31	FALSE	FALSE	FALSE
Anogam_AGAP009231	3.75424	0.465821104839036	8.05939224758234	7.66746946103934e-16	1.96133868813386e-13	Fem.Oenocytes vs Female total carcass cells	Female Oenocytes	4327.55	Female total carcass cells	343.188		TRUE	FALSE	TRUE
Anogam_AGAP003546	2.56749	0.60055219590157	4.27522036028834	1.90948335868849e-05	0.000208189446581934	Fem.Oenocytes vs Female total carcass cells	Female Oenocytes	4296.59	Female total carcass cells	777.027	Polychaetoid2C isoform F	TRUE	FALSE	TRUE
Anogam_AGAP009464	2.12854	0.494662367518283	4.30302506054202	1.68481784660315e-05	0.000188817702151626	Fem.Oenocytes vs Female total carcass cells	Female Oenocytes	4291.61	Female total carcass cells	1049.96	ABCG10 ATP-binding cassette transporter (ABC transporter) family G member 10	TRUE	FALSE	TRUE
Anogam_AGAP011872	0.632847	0.289184017199757	2.18838939361796	0.0286412502108924	0.080821089949766	Fem.Oenocytes vs Female total carcass cells	Female Oenocytes	4286.13	Female total carcass cells	2954.47	ubiquitin-activating enzyme E1	FALSE	FALSE	FALSE
Anogam_AGAP028120	3.71657	0.439224536304553	8.46165184952901	2.63616519691953e-17	1.07892969179522e-14	Fem.Oenocytes vs Female total carcass cells	Female Oenocytes	4285.71	Female total carcass cells	349.507	D7L3 D7 long form salivary protein	TRUE	FALSE	TRUE
Anogam_AGAP004146	1.22548	0.308063269713401	3.97801932391063	6.94917253348487e-05	0.000618833188534527	Fem.Oenocytes vs Female total carcass cells	Female Oenocytes	4276.65	Female total carcass cells	1958.15	Ras-related protein Rab-1A	TRUE	FALSE	TRUE
Anogam_AGAP002395	-0.374494	0.27474315047382	-1.36306858312257	0.172860896987244	0.306589131213986	Fem.Oenocytes vs Female total carcass cells	Female Oenocytes	4271.81	Female total carcass cells	5920.24	RpL10-2 60S ribosomal protein L10-2	FALSE	FALSE	FALSE
Anogam_AGAP009990	0.579839	0.332195113824497	1.74547857646481	0.0809015984439782	0.175468483254474	Fem.Oenocytes vs Female total carcass cells	Female Oenocytes	4268.42	Female total carcass cells	3050.72		FALSE	FALSE	FALSE
Anogam_AGAP010307	1.50662	0.300007080297405	5.02195075352836	5.114929966912e-07	9.36242637235126e-06	Fem.Oenocytes vs Female total carcass cells	Female Oenocytes	4247.35	Female total carcass cells	1598.32	Pleckstrin homology domain containing2C family F (with FYVE domain) member 2	TRUE	FALSE	TRUE
Anogam_AGAP004672	-0.29672	0.257802444331589	-1.15095709096682	0.249749888708537	0.397610216472033	Fem.Oenocytes vs Female total carcass cells	Female Oenocytes	4246.28	Female total carcass cells	5579.91		FALSE	FALSE	FALSE
Anogam_AGAP007699	-0.421675	0.261455992910551	-1.61279580944724	0.106788876852636	0.215430557562337	Fem.Oenocytes vs Female total carcass cells	Female Oenocytes	4233.18	Female total carcass cells	6066.15	GTP-binding nuclear protein Ran	FALSE	FALSE	FALSE
Anogam_AGAP005504	2.19113	0.578948576315924	3.78467701500319	0.000153908328890742	0.00120212978718326	Fem.Oenocytes vs Female total carcass cells	Female Oenocytes	4217.04	Female total carcass cells	986.116	phospholipid scramblase 1	FALSE	FALSE	FALSE
Anogam_AGAP002685	0.827931	0.251597409342	3.29069768003614	0.000999392554660933	0.00567783710121636	Fem.Oenocytes vs Female total carcass cells	Female Oenocytes	4166.53	Female total carcass cells	2510.89	APG8 autophagy related gene	FALSE	FALSE	FALSE
Anogam_AGAP005662	-0.209356	0.340162614062045	-0.615459180384202	0.538251518791284	0.675421822451855	Fem.Oenocytes vs Female total carcass cells	Female Oenocytes	4165.8	Female total carcass cells	5152.37	acyl-CoA dehydrogenase	FALSE	FALSE	FALSE
Anogam_AGAP007941	1.38491	0.233870012074377	5.92170504912889	3.18620704399511e-09	1.11354531177856e-07	Fem.Oenocytes vs Female total carcass cells	Female Oenocytes	4158.33	Female total carcass cells	1702.9	serine palmitoyltransferase	TRUE	FALSE	TRUE
Anogam_AGAP002919	-1.00928	0.243227433123701	-4.14952464945215	3.33166411562637e-05	0.000332906125303604	Fem.Oenocytes vs Female total carcass cells	Female Oenocytes	4155.1	Female total carcass cells	8934.76	RpS6 40S ribosomal protein S6	FALSE	FALSE	FALSE
Anogam_AGAP000953	-0.708928	0.301333553149917	-2.3526347579273	0.0186409339647465	0.0582749881843222	Fem.Oenocytes vs Female total carcass cells	Female Oenocytes	4127.77	Female total carcass cells	7212.7	RpL10-1 60S ribosomal protein L10-1	FALSE	FALSE	FALSE
Anogam_AGAP001419	1.02837	0.316294930741746	3.25128838768872	0.00114883261622468	0.00633002440991436	Fem.Oenocytes vs Female total carcass cells	Female Oenocytes	4123.19	Female total carcass cells	2161.14		FALSE	FALSE	FALSE
Anogam_AGAP003484	2.48818	0.328528502367608	7.57370535207051	3.62726605680904e-14	6.39899763677071e-12	Fem.Oenocytes vs Female total carcass cells	Female Oenocytes	4122.91	Female total carcass cells	786.886	oxysterol-binding protein	TRUE	FALSE	TRUE
Anogam_AGAP011034	3.76023	0.582456083600692	6.45582461328058	1.0763120304184e-10	5.75757640327825e-09	Fem.Oenocytes vs Female total carcass cells	Female Oenocytes	4116.55	Female total carcass cells	324.769	Odz2C odd Oz-ten-m homolog 1	TRUE	FALSE	TRUE
Anogam_AGAP008816	1.42629	0.442819559806146	3.22092701331434	0.00127776684273607	0.00690518382264368	Fem.Oenocytes vs Female total carcass cells	Female Oenocytes	4114.76	Female total carcass cells	1639.8	Prosalpha5 26S proteasome alpha 5 subunit	FALSE	FALSE	FALSE
Anogam_AGAP028433	0.764818	0.238504641475715	3.20672113363611	0.00134257073832454	0.00719601036906058	Fem.Oenocytes vs Female total carcass cells	Female Oenocytes	4112.33	Female total carcass cells	2587.54		FALSE	FALSE	FALSE
Anogam_AGAP010727	1.16662	0.295453393475698	3.94859022247253	7.86127875045918e-05	0.000678217573142482	Fem.Oenocytes vs Female total carcass cells	Female Oenocytes	4110.56	Female total carcass cells	1956.83		TRUE	FALSE	TRUE
Anogam_AGAP003016	1.04128	0.289902399075869	3.59181238902704	0.000328386229620725	0.00228264123741797	Fem.Oenocytes vs Female total carcass cells	Female Oenocytes	4102.85	Female total carcass cells	2129.59	mesencephalic astrocyte-derived neurotrophic factor homolog	FALSE	FALSE	FALSE
Anogam_AGAP003341	2.02553	0.452974421913675	4.47162869329207	7.76261228716289e-06	9.73370697576602e-05	Fem.Oenocytes vs Female total carcass cells	Female Oenocytes	4096.45	Female total carcass cells	1077.94		TRUE	FALSE	TRUE
Anogam_AGAP007609	2.16075	0.383205835417691	5.6386142461407	1.71424071497847e-08	4.87225305434992e-07	Fem.Oenocytes vs Female total carcass cells	Female Oenocytes	4073.03	Female total carcass cells	973.033		TRUE	FALSE	TRUE
Anogam_AGAP004002	0.301247	0.340484165498519	0.884761101366476	0.376285493248249	0.528431672648378	Fem.Oenocytes vs Female total carcass cells	Female Oenocytes	4063.23	Female total carcass cells	3525.88	60 kDa heat shock protein2C mitochondrial precursor	FALSE	FALSE	FALSE
Anogam_AGAP006366	0.743005	0.399528319228197	1.85970593710214	0.0629271415910398	0.146334207445345	Fem.Oenocytes vs Female total carcass cells	Female Oenocytes	4051.61	Female total carcass cells	2587.99	2-oxoglutarate dehydrogenase E1 component	FALSE	FALSE	FALSE
Anogam_AGAP012678	2.39859	0.702856387841497	3.41263383920491	0.000643383252436781	0.00395381227563552	Fem.Oenocytes vs Female total carcass cells	Female Oenocytes	4044.71	Female total carcass cells	822.752	G6PD Glucose-6-phosphate 1-dehydrogenase	FALSE	FALSE	FALSE
Anogam_AGAP002569	1.17382	0.290984846149718	4.03396733998652	5.48429439819368e-05	0.0005024953347335	Fem.Oenocytes vs Female total carcass cells	Female Oenocytes	4040.31	Female total carcass cells	1915.8	serine incorporator 1	TRUE	FALSE	TRUE
Anogam_AGAP011797	1.61248	0.287041792755307	5.61757966243328	1.936508989817e-08	5.38433695212163e-07	Fem.Oenocytes vs Female total carcass cells	Female Oenocytes	4033.86	Female total carcass cells	1410.21		TRUE	FALSE	TRUE
Anogam_AGAP002109	1.74165	0.426207082713088	4.08640398619721	4.38110666974591e-05	0.000416612299673235	Fem.Oenocytes vs Female total carcass cells	Female Oenocytes	4026.81	Female total carcass cells	1286.37	solute carrier family 31 (copper transporter)2C member 1	TRUE	FALSE	TRUE
Anogam_AGAP011762	1.42381	0.363276784706509	3.91935821294252	8.87850740881257e-05	0.000755781096563812	Fem.Oenocytes vs Female total carcass cells	Female Oenocytes	4024.72	Female total carcass cells	1604.8		TRUE	FALSE	TRUE
Anogam_AGAP005203	1.62762	0.474623861918686	3.42927957725042	0.000605185781870083	0.00375743987869823	Fem.Oenocytes vs Female total carcass cells	Female Oenocytes	4016	Female total carcass cells	1389.65	PGRPLC peptidoglycan recognition protein (long)	FALSE	FALSE	FALSE
Anogam_AGAP003816	-0.585775	0.291757173708362	-2.00774686645262	0.0446701976341944	0.113387611558689	Fem.Oenocytes vs Female total carcass cells	Female Oenocytes	4010.53	Female total carcass cells	6435.07	RpL30 60S ribosomal protein L30	FALSE	FALSE	FALSE
Anogam_AGAP004837	1.37884	0.564522203878525	2.44249703839625	0.0145860492923042	0.0479885711764811	Fem.Oenocytes vs Female total carcass cells	Female Oenocytes	3999.7	Female total carcass cells	1647.7		FALSE	FALSE	FALSE
Anogam_AGAP009264	1.27871	0.37088288067597	3.44774272764486	0.000565292216077334	0.00355723859465146	Fem.Oenocytes vs Female total carcass cells	Female Oenocytes	3993.42	Female total carcass cells	1760.29	ethanolamine-phosphate cytidylyltransferase	FALSE	FALSE	FALSE
Anogam_AGAP007721	1.49787	0.294208891120122	5.09118290244881	3.55836568551193e-07	6.70519294551715e-06	Fem.Oenocytes vs Female total carcass cells	Female Oenocytes	3992.7	Female total carcass cells	1512.87		TRUE	FALSE	TRUE
Anogam_AGAP008926	1.40098	0.38563755569274	3.6329009548965	0.000280252613343981	0.00199550782166709	Fem.Oenocytes vs Female total carcass cells	Female Oenocytes	3981.1	Female total carcass cells	1610.36	shingomyelin synthase	FALSE	FALSE	FALSE
Anogam_AGAP000523	-1.14201	0.269637434992703	-4.23535271020447	2.28193238919433e-05	0.000241675168345598	Fem.Oenocytes vs Female total carcass cells	Female Oenocytes	3972.14	Female total carcass cells	9374.06	F-type H+-transporting ATPase subunit c	FALSE	TRUE	TRUE
Anogam_AGAP028022	3.8676	0.438826709176748	8.81349583599961	1.21302618029835e-18	6.53246519832247e-16	Fem.Oenocytes vs Female total carcass cells	Female Oenocytes	3969.75	Female total carcass cells	291.057		TRUE	FALSE	TRUE
Anogam_AGAP011800	-0.40284	0.427007160357828	-0.943403164594102	0.345474725116585	0.498704393404347	Fem.Oenocytes vs Female total carcass cells	Female Oenocytes	3968.31	Female total carcass cells	5613.99	Transaldolase	FALSE	FALSE	FALSE
Anogam_AGAP011092	0.205556	0.391599558045923	0.524913990663163	0.599642983099377	0.723199946192657	Fem.Oenocytes vs Female total carcass cells	Female Oenocytes	3956.86	Female total carcass cells	3667.19	polyadenylate-binding protein	FALSE	FALSE	FALSE
Anogam_AGAP002238	2.36147	0.447485521089299	5.277191203682	1.31178994764743e-07	2.8114532686765e-06	Fem.Oenocytes vs Female total carcass cells	Female Oenocytes	3947.94	Female total carcass cells	822.043		TRUE	FALSE	TRUE
Anogam_AGAP013333	-0.892654	0.343531855174239	-2.59845926189664	0.00936431557446178	0.0337260390559285	Fem.Oenocytes vs Female total carcass cells	Female Oenocytes	3920.91	Female total carcass cells	7790.44	Phosphate carrier2C mitochondrial	FALSE	FALSE	FALSE
Anogam_AGAP004991	1.24786	0.430672992277487	2.89746294504312	0.00376194175658135	0.016449653014248	Fem.Oenocytes vs Female total carcass cells	Female Oenocytes	3908.23	Female total carcass cells	1761.94	20S proteasome subunit beta 6	FALSE	FALSE	FALSE
Anogam_AGAP009271	1.58344	0.421639494297148	3.75543654725707	0.0001730395985969	0.00132129938271902	Fem.Oenocytes vs Female total carcass cells	Female Oenocytes	3885.29	Female total carcass cells	1388.36	Prosbeta1 26S proteasome beta 1 subunit	FALSE	FALSE	FALSE
Anogam_AGAP012404	1.23204	0.380216734903523	3.24035026748378	0.00119382952804121	0.00651708851365966	Fem.Oenocytes vs Female total carcass cells	Female Oenocytes	3880.67	Female total carcass cells	1768.68	alanine--glyoxylate aminotransferase 22C mitochondrial	FALSE	FALSE	FALSE
Anogam_AGAP006209	2.64245	0.615871671446041	4.29058974956223	1.78199248650414e-05	0.000197740167382546	Fem.Oenocytes vs Female total carcass cells	Female Oenocytes	3829.92	Female total carcass cells	656.14	carboxypeptidase B	TRUE	FALSE	TRUE
Anogam_AGAP001617	1.2195	0.331289134951664	3.68107808829081	0.000232249855757542	0.0016925787208769	Fem.Oenocytes vs Female total carcass cells	Female Oenocytes	3828.95	Female total carcass cells	1759.57	Ras-related protein Rab-7A	FALSE	FALSE	FALSE
Anogam_AGAP001889	2.7664	0.703328894765505	3.93328837764776	8.3791610456459e-05	0.000717452517314216	Fem.Oenocytes vs Female total carcass cells	Female Oenocytes	3819.57	Female total carcass cells	602.542		TRUE	FALSE	TRUE
Anogam_AGAP007966	-1.44636	0.315018350957268	-4.59134074351378	4.40407631783389e-06	5.98439693015623e-05	Fem.Oenocytes vs Female total carcass cells	Female Oenocytes	3818.76	Female total carcass cells	11129.2	F-type H+-transporting ATPase subunit gamma	FALSE	TRUE	TRUE
Anogam_AGAP009431	-0.415646	0.288923706742498	-1.43860180588862	0.150263374414967	0.276169233895004	Fem.Oenocytes vs Female total carcass cells	Female Oenocytes	3811.34	Female total carcass cells	5436.42	RpS21 40S ribosomal protein S21	FALSE	FALSE	FALSE
Anogam_AGAP007366	1.83401	0.277371583232853	6.61211783798111	3.78860217833598e-11	2.36267794707645e-09	Fem.Oenocytes vs Female total carcass cells	Female Oenocytes	3788.52	Female total carcass cells	1135.93		TRUE	FALSE	TRUE
Anogam_AGAP000541	-0.989244	0.286515230112749	-3.45267622938022	0.000555054779144859	0.00349927325952569	Fem.Oenocytes vs Female total carcass cells	Female Oenocytes	3774.46	Female total carcass cells	8010.91	RpS15a-1 40S ribosomal protein S15a	FALSE	FALSE	FALSE
Anogam_AGAP008444	-1.85549	0.310291193042096	-5.97982712333817	2.2337455502114e-09	8.19200160206562e-08	Fem.Oenocytes vs Female total carcass cells	Female Oenocytes	3750.58	Female total carcass cells	14521.1	CPLCG1 cuticular protein CPLCG family (CPLCG1)	FALSE	TRUE	TRUE
Anogam_AGAP002194	1.72024	0.373472463251539	4.60605629851065	4.10377329456925e-06	5.62112561580088e-05	Fem.Oenocytes vs Female total carcass cells	Female Oenocytes	3737.91	Female total carcass cells	1214.71	1D-myo-inositol-triphosphate 3-kinase	TRUE	FALSE	TRUE
Anogam_AGAP003088	1.06723	0.388531791842512	2.74682863508497	0.00601745662797051	0.0239667638059144	Fem.Oenocytes vs Female total carcass cells	Female Oenocytes	3715.21	Female total carcass cells	1895.06		FALSE	FALSE	FALSE
Anogam_AGAP005630	0.317855	0.218413172263309	1.45529250255769	0.145588301372855	0.270453794416676	Fem.Oenocytes vs Female total carcass cells	Female Oenocytes	3707.08	Female total carcass cells	3178.39	transitional endoplasmic reticulum ATPase	FALSE	FALSE	FALSE
Anogam_AGAP010214	0.647769	0.425387811455092	1.52277191708252	0.127815778193281	0.246199367935552	Fem.Oenocytes vs Female total carcass cells	Female Oenocytes	3704.49	Female total carcass cells	2531.4		FALSE	FALSE	FALSE
Anogam_AGAP001995	1.1933	0.420484323753187	2.83791353122168	0.0045409482374041	0.0191127035644256	Fem.Oenocytes vs Female total carcass cells	Female Oenocytes	3689.3	Female total carcass cells	1727.14	Prosalpha2 26S proteasome alpha 2 subunit	FALSE	FALSE	FALSE
Anogam_AGAP028617	1.52086	0.581148999944229	2.61699354232903	0.00887080195132195	0.0323123975889247	Fem.Oenocytes vs Female total carcass cells	Female Oenocytes	3687.28	Female total carcass cells	1372.51	sortilin-related receptor	FALSE	FALSE	FALSE
Anogam_AGAP000162	0.320885	0.481242603773989	0.666783438713669	0.504910472802842	0.644893765786879	Fem.Oenocytes vs Female total carcass cells	Female Oenocytes	3686.28	Female total carcass cells	3152.81	Cystathionine beta-synthase	FALSE	FALSE	FALSE
Anogam_AGAP003325	-0.245074	0.355217801972038	-0.689926426640615	0.490240456109607	0.63239288286857	Fem.Oenocytes vs Female total carcass cells	Female Oenocytes	3676.54	Female total carcass cells	4664.13	NADH dehydrogenase (ubiquinone) 1 alpha subcomplex 4	FALSE	FALSE	FALSE
Anogam_AGAP001157	0.7031	0.254723238781173	2.76025041403842	0.00577570713047493	0.0231753079839292	Fem.Oenocytes vs Female total carcass cells	Female Oenocytes	3654.68	Female total carcass cells	2400.66		FALSE	FALSE	FALSE
Anogam_AGAP001813	1.06261	0.236696176586925	4.48935998086755	7.14374858729645e-06	9.11406926997722e-05	Fem.Oenocytes vs Female total carcass cells	Female Oenocytes	3647.55	Female total carcass cells	1867.44	Histone H3	TRUE	FALSE	TRUE
Anogam_AGAP005715	1.45206	0.281068957408227	5.16619576426307	2.38906568196403e-07	4.71000386471214e-06	Fem.Oenocytes vs Female total carcass cells	Female Oenocytes	3598.52	Female total carcass cells	1406.84	Autophagy-related protein 13	TRUE	FALSE	TRUE
Anogam_AGAP010876	-0.824737	0.312797551369926	-2.63664855219434	0.00837295298557112	0.0308616912638198	Fem.Oenocytes vs Female total carcass cells	Female Oenocytes	3592.99	Female total carcass cells	6807.88	molecular chaperone DnaK	FALSE	FALSE	FALSE
Anogam_AGAP005749	1.21841	0.287689075807935	4.23514823626881	2.28400984939595e-05	0.000241675168345598	Fem.Oenocytes vs Female total carcass cells	Female Oenocytes	3584.26	Female total carcass cells	1648.76	GSTO1 glutathione S-transferase omega class 1	TRUE	FALSE	TRUE
Anogam_AGAP004098	0.984537	0.318961124968685	3.08669829280174	0.00202392905886951	0.00996096302566274	Fem.Oenocytes vs Female total carcass cells	Female Oenocytes	3583.27	Female total carcass cells	1938.39	GTP-binding protein SAR1	FALSE	FALSE	FALSE
Anogam_AGAP000655	-0.531323	0.276529542325597	-1.92139591700276	0.0546818129044768	0.131431597284145	Fem.Oenocytes vs Female total carcass cells	Female Oenocytes	3577.37	Female total carcass cells	5524.95	RpS14-1 40S ribosomal protein S14a	FALSE	FALSE	FALSE
Anogam_AGAP010224	0.880387	0.274264686574032	3.20998885118056	0.00132740120658919	0.00712216525737842	Fem.Oenocytes vs Female total carcass cells	Female Oenocytes	3570.64	Female total carcass cells	2072.94	ER lumen protein retaining receptor	FALSE	FALSE	FALSE
Anogam_AGAP000889	1.60121	0.465039324793494	3.44316136851002	0.000574956134831931	0.00360695963923992	Fem.Oenocytes vs Female total carcass cells	Female Oenocytes	3553.57	Female total carcass cells	1250.77	Coactosin-like protein	FALSE	FALSE	FALSE
Anogam_AGAP011161	-1.19774	0.372108299765682	-3.21878970442014	0.00128732857868641	0.00694356669326271	Fem.Oenocytes vs Female total carcass cells	Female Oenocytes	3520.9	Female total carcass cells	8640.58	transketolase	FALSE	FALSE	FALSE
Anogam_AGAP006821	-0.229755	0.384639244885005	-0.597326723361103	0.550289266048026	0.685012657665619	Fem.Oenocytes vs Female total carcass cells	Female Oenocytes	3515.63	Female total carcass cells	4412.96	acetyl-CoA acyltransferase 2	FALSE	FALSE	FALSE
Anogam_AGAP010025	0.926647	0.323164281697144	2.86741805930733	0.0041383595263735	0.0177426538849473	Fem.Oenocytes vs Female total carcass cells	Female Oenocytes	3511.13	Female total carcass cells	1977.27	Rab GDP dissociation inhibitor beta	FALSE	FALSE	FALSE
Anogam_AGAP008632	2.08335	0.524062294595067	3.97538293367055	7.02661018507247e-05	0.00062413060911937	Fem.Oenocytes vs Female total carcass cells	Female Oenocytes	3510.52	Female total carcass cells	886.019	alpha-aminoadipic semialdehyde synthase	TRUE	FALSE	TRUE
Anogam_AGAP003549	0.915801	0.290471357523223	3.15280848688157	0.00161707859163514	0.00833549025169308	Fem.Oenocytes vs Female total carcass cells	Female Oenocytes	3509.88	Female total carcass cells	1990.89		FALSE	FALSE	FALSE
Anogam_AGAP007157	-0.540376	0.241853087258676	-2.23431654318947	0.0254622525883147	0.0739945500426757	Fem.Oenocytes vs Female total carcass cells	Female Oenocytes	3478.26	Female total carcass cells	5409.22	RpS27 40S ribosomal protein S27	FALSE	FALSE	FALSE
Anogam_AGAP003976	2.17435	0.592731124929373	3.6683612382498	0.00024411012106959	0.00176893396514451	Fem.Oenocytes vs Female total carcass cells	Female Oenocytes	3474.58	Female total carcass cells	825.739		FALSE	FALSE	FALSE
Anogam_AGAP004677	-0.0461415	0.359691202710936	-0.128280939771204	0.897926648333104	0.938580339985535	Fem.Oenocytes vs Female total carcass cells	Female Oenocytes	3454.88	Female total carcass cells	3819.07	methylenetetrahydrofolate dehydrogenase(NAD+) - 52C10-methenyltetrahydrofolate	FALSE	FALSE	FALSE
Anogam_AGAP009874	-2.21167	0.898631841963535	-2.46115156395053	0.0138491846906354	0.0459782147159576	Fem.Oenocytes vs Female total carcass cells	Female Oenocytes	3452.83	Female total carcass cells	17017.9	CPR76 cuticular protein RR-1 family 76	FALSE	FALSE	FALSE
Anogam_AGAP002652	1.59834	0.331800412751878	4.81718078661513	1.45600758436421e-06	2.26756006137209e-05	Fem.Oenocytes vs Female total carcass cells	Female Oenocytes	3443.22	Female total carcass cells	1216.8		TRUE	FALSE	TRUE
Anogam_AGAP004462	-0.625994	0.295702979838368	-2.11696943870282	0.0342624416113271	0.0926217444034606	Fem.Oenocytes vs Female total carcass cells	Female Oenocytes	3439.55	Female total carcass cells	5675.76	RpS25 40S ribosomal protein S25	FALSE	FALSE	FALSE
Anogam_AGAP010548	0.0677146	0.547811132974115	0.123609390180865	0.901624557222598	0.9410815535552	Fem.Oenocytes vs Female total carcass cells	Female Oenocytes	3432.98	Female total carcass cells	3498.61		FALSE	FALSE	FALSE
Anogam_AGAP005061	-0.725808	0.267724538874469	-2.7110241041279	0.00670757499666289	0.0260462646549733	Fem.Oenocytes vs Female total carcass cells	Female Oenocytes	3420.96	Female total carcass cells	6050.91	RpS9 40S ribosomal protein S9	FALSE	FALSE	FALSE
Anogam_AGAP008368	1.04603	0.908016095782901	1.1519969759609	0.249322315985559	0.397353786461603	Fem.Oenocytes vs Female total carcass cells	Female Oenocytes	3410.53	Female total carcass cells	1763.36	TEP14 thioester-containing protein 14	FALSE	FALSE	FALSE
Anogam_AGAP009561	3.38486	0.629025953383724	5.38111757174977	7.40248250153382e-08	1.71362445601118e-06	Fem.Oenocytes vs Female total carcass cells	Female Oenocytes	3405.03	Female total carcass cells	349.613		TRUE	FALSE	TRUE
Anogam_AGAP000494	1.19918	0.276543797918617	4.33632136482439	1.4488707137743e-05	0.00016732330861556	Fem.Oenocytes vs Female total carcass cells	Female Oenocytes	3401.92	Female total carcass cells	1584.93		TRUE	FALSE	TRUE
Anogam_AGAP010150	-0.0781531	0.377692242518922	-0.206922697704851	0.836070229917533	0.897336083998764	Fem.Oenocytes vs Female total carcass cells	Female Oenocytes	3390.74	Female total carcass cells	3832.91	cytochrome b5-related	FALSE	FALSE	FALSE
Anogam_AGAP004235	-1.13344	0.272095006124542	-4.16561439463933	3.1051517070118e-05	0.000313641779527589	Fem.Oenocytes vs Female total carcass cells	Female Oenocytes	3386.36	Female total carcass cells	7941.37	elongation factor 1-delta	FALSE	TRUE	TRUE
Anogam_AGAP002244	3.92084	0.406229400928637	9.6517772294314	4.83110917498706e-22	4.94319090784676e-19	Fem.Oenocytes vs Female total carcass cells	Female Oenocytes	3385.75	Female total carcass cells	239.277		TRUE	FALSE	TRUE
Anogam_AGAP005890	0.695895	0.940038932259529	0.740282830552658	0.459128396772126	0.60624619380209	Fem.Oenocytes vs Female total carcass cells	Female Oenocytes	3378.92	Female total carcass cells	2223.78		FALSE	FALSE	FALSE
Anogam_AGAP004981	3.34398	0.505015963514318	6.62152341130981	3.55515701729135e-11	2.24545472845217e-09	Fem.Oenocytes vs Female total carcass cells	Female Oenocytes	3377.97	Female total carcass cells	355.34	PPO4 prophenoloxidase 4	TRUE	FALSE	TRUE
Anogam_AGAP009176	-3.28793	0.592033659216742	-5.55361451032941	2.79822210120059e-08	7.34138680499601e-07	Fem.Oenocytes vs Female total carcass cells	Female Oenocytes	3369.4	Female total carcass cells	35089.2	fatty acid synthase2C animal type	FALSE	TRUE	TRUE
Anogam_AGAP003769	-1.01279	0.320450604598405	-3.16052139608911	0.00157487037893955	0.00815902466699215	Fem.Oenocytes vs Female total carcass cells	Female Oenocytes	3366.09	Female total carcass cells	7257.34	importin beta-3	FALSE	FALSE	FALSE
Anogam_AGAP006747	1.87571	0.529430813756528	3.54288782919465	0.000395771004537475	0.00265717120631722	Fem.Oenocytes vs Female total carcass cells	Female Oenocytes	3360.54	Female total carcass cells	977.439	REL2 IMD pathway signalling NF-kappaB Relish-like transcription factor	FALSE	FALSE	FALSE
Anogam_AGAP005317	2.6041	0.342004050398132	7.61424191126335	2.65243609795247e-14	4.93449566440904e-12	Fem.Oenocytes vs Female total carcass cells	Female Oenocytes	3359.18	Female total carcass cells	591.335	MFS transporter2C PCFT-HCP family2C solute carrier family 46 (folate transporter	TRUE	FALSE	TRUE
Anogam_AGAP006569	1.19114	0.543573183720458	2.19131010391626	0.0284293593883861	0.080400554245983	Fem.Oenocytes vs Female total carcass cells	Female Oenocytes	3355.57	Female total carcass cells	1574.25	acetyl-CoA synthetase	FALSE	FALSE	FALSE
Anogam_AGAP002924	2.7166	0.568479407748009	4.77870438309891	1.76428364464466e-06	2.6547279782359e-05	Fem.Oenocytes vs Female total carcass cells	Female Oenocytes	3348.16	Female total carcass cells	544.236	Protein tweety homolog	TRUE	FALSE	TRUE
Anogam_AGAP011231	6.90109	1.78574326827001	3.8645475189598	NA	NA	Fem.Oenocytes vs Female total carcass cells	Female Oenocytes	3341.34	Female total carcass cells	29.936	fibrinogen	FALSE	FALSE	FALSE
Anogam_AGAP005849	3.79973	0.654426914533724	5.80618786436441	6.39112492941264e-09	2.03086926328416e-07	Fem.Oenocytes vs Female total carcass cells	Female Oenocytes	3335.01	Female total carcass cells	256.005	colmedin	TRUE	FALSE	TRUE
Anogam_AGAP002338	2.43678	0.350717082051093	6.94800202925849	3.70495676655365e-12	3.21263708774381e-10	Fem.Oenocytes vs Female total carcass cells	Female Oenocytes	3328.29	Female total carcass cells	658.647	vacuolar protein sorting 29 homolog	TRUE	FALSE	TRUE
Anogam_AGAP010739	1.98968	0.660637912175141	3.01175055177171	0.00259745947500938	0.0122025736218071	Fem.Oenocytes vs Female total carcass cells	Female Oenocytes	3327.38	Female total carcass cells	898.405	Glucose-6-phosphate 1-dehydrogenase	FALSE	FALSE	FALSE
Anogam_AGAP011326	2.14903	0.407939544391746	5.26801249361517	1.3790872348634e-07	2.90944754373656e-06	Fem.Oenocytes vs Female total carcass cells	Female Oenocytes	3324.66	Female total carcass cells	801.023	IAP2 inhibitor of apoptosis 2	TRUE	FALSE	TRUE
Anogam_AGAP004443	0.420899	0.513788473840874	0.819206487138981	0.412668614359631	0.563591198895855	Fem.Oenocytes vs Female total carcass cells	Female Oenocytes	3321.64	Female total carcass cells	2656.74	glycogen synthase kinase 3 beta	FALSE	FALSE	FALSE
Anogam_AGAP001148	1.23976	0.332880958710405	3.72433680166922	0.00019582934414306	0.00147116435335667	Fem.Oenocytes vs Female total carcass cells	Female Oenocytes	3308.35	Female total carcass cells	1498.73		FALSE	FALSE	FALSE
Anogam_AGAP012184	-0.442949	0.288894067688616	-1.53325913775347	0.125212018398937	0.24269167877589	Fem.Oenocytes vs Female total carcass cells	Female Oenocytes	3289.22	Female total carcass cells	4783.32	FK506-binding protein 1	FALSE	FALSE	FALSE
Anogam_AGAP007939	-2.22329	0.492092903742528	-4.51802655530866	6.24186574697493e-06	8.1049200917573e-05	Fem.Oenocytes vs Female total carcass cells	Female Oenocytes	3281.53	Female total carcass cells	16400.4	starch phosphorylase	FALSE	TRUE	TRUE
Anogam_AGAP004386	3.05221	0.682396755729023	4.47277501167572	7.72110035357009e-06	9.69353359726738e-05	Fem.Oenocytes vs Female total carcass cells	Female Oenocytes	3277.68	Female total carcass cells	423.834	heart-and neural crest derivatives-expressed protein	TRUE	FALSE	TRUE
Anogam_AGAP003477	-0.494264	0.248019990225177	-1.99283843840398	0.0462791411891012	0.116314622756481	Fem.Oenocytes vs Female total carcass cells	Female Oenocytes	3275.9	Female total carcass cells	4930.1	T-complex protein 1 subunit zeta	FALSE	FALSE	FALSE
Anogam_AGAP010895	1.43662	0.357874148671716	4.01432108958272	5.96171440266705e-05	0.000539242403449447	Fem.Oenocytes vs Female total carcass cells	Female Oenocytes	3275.12	Female total carcass cells	1292.97	spectrin beta	TRUE	FALSE	TRUE
Anogam_AGAP010934	1.75692	0.582169165637929	3.01788876162564	0.00254542320429714	0.0120188141330726	Fem.Oenocytes vs Female total carcass cells	Female Oenocytes	3271.47	Female total carcass cells	1034.63		FALSE	FALSE	FALSE
Anogam_AGAP001382	2.04585	0.639802360127907	3.19762483186959	0.00138564423388687	0.00737280904894982	Fem.Oenocytes vs Female total carcass cells	Female Oenocytes	3267.92	Female total carcass cells	845.034	DH31 diuretic hormone 31	FALSE	FALSE	FALSE
Anogam_AGAP007796	2.94061	0.527237682267446	5.57739576712303	2.44145983822738e-08	6.55669739232087e-07	Fem.Oenocytes vs Female total carcass cells	Female Oenocytes	3260.38	Female total carcass cells	455.45	Nep3 neprilysin2C neutral endopeptidase 3	TRUE	FALSE	TRUE
Anogam_AGAP005608	0.398275	0.349172928407627	1.14062295645904	0.254026859910458	0.402852267607534	Fem.Oenocytes vs Female total carcass cells	Female Oenocytes	3256.86	Female total carcass cells	2643.43		FALSE	FALSE	FALSE
Anogam_AGAP009871	-1.90949	0.743492576717504	-2.56827129223089	0.0102207131791748	0.0361237779790385	Fem.Oenocytes vs Female total carcass cells	Female Oenocytes	3253.05	Female total carcass cells	13015.5	CPR75 cuticular protein RR-1 family 75	FALSE	FALSE	FALSE
Anogam_AGAP001440	0.552949	0.322977735752601	1.71203451561415	0.0868903078847339	0.184458974363577	Fem.Oenocytes vs Female total carcass cells	Female Oenocytes	3248.17	Female total carcass cells	2369.6	Proteasome 26S non-ATPase subunit 11	FALSE	FALSE	FALSE
Anogam_AGAP004593	1.74843	0.328988707797077	5.31456102363061	1.06914749489154e-07	2.36274668849464e-06	Fem.Oenocytes vs Female total carcass cells	Female Oenocytes	3226.17	Female total carcass cells	1026.73	EH domain-containing protein 1	TRUE	FALSE	TRUE
Anogam_AGAP005188	1.21549	0.434267707594572	2.79894196467821	0.00512703514738465	0.0210779078065924	Fem.Oenocytes vs Female total carcass cells	Female Oenocytes	3215.46	Female total carcass cells	1483.06		FALSE	FALSE	FALSE
Anogam_AGAP001312	-0.872743	0.302713674425286	-2.88306532310694	0.00393825762729967	0.0171109350499067	Fem.Oenocytes vs Female total carcass cells	Female Oenocytes	3215.16	Female total carcass cells	6296.87	succinyl-CoA synthetase alpha subunit	FALSE	FALSE	FALSE
Anogam_AGAP001408	-0.790822	0.270620753630502	-2.92225140255898	0.00347510913889081	0.0153861171393902	Fem.Oenocytes vs Female total carcass cells	Female Oenocytes	3209.37	Female total carcass cells	5934.81	RpL35 60S ribosomal protein L35	FALSE	FALSE	FALSE
Anogam_AGAP001763	2.55066	0.350308025348754	7.28118278786275	3.30905958345968e-13	4.03074972118565e-11	Fem.Oenocytes vs Female total carcass cells	Female Oenocytes	3201.39	Female total carcass cells	585.429	solute carrier family 27 (fatty acid transporter)2C member 1-4	TRUE	FALSE	TRUE
Anogam_AGAP001138	-1.08634	0.315012403525028	-3.44857126502856	0.000563560734264426	0.00354852518953453	Fem.Oenocytes vs Female total carcass cells	Female Oenocytes	3177.56	Female total carcass cells	7216.12	F-type H+-transporting ATPase subunit b	FALSE	FALSE	FALSE
Anogam_AGAP010225	2.40283	0.549694234077831	4.3712029387933	1.23563878303992e-05	0.000146331666991487	Fem.Oenocytes vs Female total carcass cells	Female Oenocytes	3172.74	Female total carcass cells	641.093	ER lumen protein retaining receptor	TRUE	FALSE	TRUE
Anogam_AGAP005914	1.71454	0.377917931819185	4.53680622663369	5.71125373498642e-06	7.50161081083196e-05	Fem.Oenocytes vs Female total carcass cells	Female Oenocytes	3165.51	Female total carcass cells	1031.93	SP11644	TRUE	FALSE	TRUE
Anogam_AGAP004400	-0.620695	0.314092548594622	-1.97615433858791	0.0481372996566568	0.119590475457282	Fem.Oenocytes vs Female total carcass cells	Female Oenocytes	3162.82	Female total carcass cells	5203.46		FALSE	FALSE	FALSE
Anogam_AGAP011940	2.58368	0.367273514408518	7.03474951655194	1.9961928011953e-12	1.84889392188472e-10	Fem.Oenocytes vs Female total carcass cells	Female Oenocytes	3162.25	Female total carcass cells	563.849	sphingomyelin phosphodiesterase	TRUE	FALSE	TRUE
Anogam_AGAP028034	-0.113055	0.363964015820735	-0.310622556105975	0.756087577589655	0.840626762348946	Fem.Oenocytes vs Female total carcass cells	Female Oenocytes	3159.11	Female total carcass cells	3651.9		FALSE	FALSE	FALSE
Anogam_AGAP028149	-0.113549	0.363952527694332	-0.311988169456027	0.755049514325363	0.839783000962367	Fem.Oenocytes vs Female total carcass cells	Female Oenocytes	3158.38	Female total carcass cells	3652.31		FALSE	FALSE	FALSE
Anogam_AGAP003184	2.5795	0.422560610705672	6.10446035803664	1.03148587093818e-09	4.09076101993779e-08	Fem.Oenocytes vs Female total carcass cells	Female Oenocytes	3155.8	Female total carcass cells	565.298	5-aminolevulinate synthase	TRUE	FALSE	TRUE
Anogam_AGAP012581	2.87129	0.689612315999644	4.16363182910022	3.13225040521347e-05	0.000315444745532916	Fem.Oenocytes vs Female total carcass cells	Female Oenocytes	3153.48	Female total carcass cells	463.074		TRUE	FALSE	TRUE
Anogam_AGAP008955	-1.44746	0.378905131982187	-3.82010963926725	0.000133392365709172	0.00106797393265747	Fem.Oenocytes vs Female total carcass cells	Female Oenocytes	3151.16	Female total carcass cells	9189.41	ubiquinol-cytochrome c reductase iron-sulfur subunit	FALSE	FALSE	FALSE
Anogam_AGAP006216	3.77583	0.457532776500957	8.25259074318361	1.54997124616656e-16	5.11590509379879e-14	Fem.Oenocytes vs Female total carcass cells	Female Oenocytes	3145.31	Female total carcass cells	245.22	GPRMTH2 methuselah receptor 2	TRUE	FALSE	TRUE
Anogam_AGAP001267	1.86847	0.349503475789898	5.3460798893815	8.98795498360009e-08	2.01677095158325e-06	Fem.Oenocytes vs Female total carcass cells	Female Oenocytes	3140.15	Female total carcass cells	920.899	Adaptor-related protein complex 22C beta 1 subunit	TRUE	FALSE	TRUE
Anogam_AGAP000654	-0.420742	0.255705324438672	-1.64541905672936	0.099883422301655	0.204770021436693	Fem.Oenocytes vs Female total carcass cells	Female Oenocytes	3140.13	Female total carcass cells	4494.3	RpS30 40S ribosomal protein S30	FALSE	FALSE	FALSE
Anogam_AGAP004026	2.14364	0.345755972240084	6.19987477497104	5.65081035135312e-10	2.39913242801017e-08	Fem.Oenocytes vs Female total carcass cells	Female Oenocytes	3134.72	Female total carcass cells	759.627	GPRMTH6 methuselah receptor 6	TRUE	FALSE	TRUE
Anogam_AGAP003878	-0.0799727	0.6211841652266	-0.128742332053608	0.897561537982807	0.938580339985535	Fem.Oenocytes vs Female total carcass cells	Female Oenocytes	3134.39	Female total carcass cells	3537.16		FALSE	FALSE	FALSE
Anogam_AGAP004739	-0.478754	0.280901855962278	-1.70434586415073	0.0883164912698587	0.186705441874627	Fem.Oenocytes vs Female total carcass cells	Female Oenocytes	3121.46	Female total carcass cells	4650.43	H-ACA ribonucleoprotein complex subunit 4	FALSE	FALSE	FALSE
Anogam_AGAP010298	1.05912	0.357674990380031	2.96113466818197	0.00306507886439353	0.0139262375401752	Fem.Oenocytes vs Female total carcass cells	Female Oenocytes	3121.15	Female total carcass cells	1604.12	V-type H+-transporting ATPase subunit D	FALSE	FALSE	FALSE
Anogam_AGAP011798	1.08924	0.312627552620446	3.48413860313649	0.00049372373568256	0.00317922043014723	Fem.Oenocytes vs Female total carcass cells	Female Oenocytes	3119.84	Female total carcass cells	1568.62	acyl-CoA oxidase	FALSE	FALSE	FALSE
Anogam_AGAP002016	1.21941	0.280774152093144	4.34302564092845	1.40533724667741e-05	0.00016284723338622	Fem.Oenocytes vs Female total carcass cells	Female Oenocytes	3118.88	Female total carcass cells	1431.7	iron-zinc purple acid phosphatase-like protein precursor	TRUE	FALSE	TRUE
Anogam_AGAP005245	0.403095	0.26862672689037	1.5005764057401	0.133465157703291	0.254446710195654	Fem.Oenocytes vs Female total carcass cells	Female Oenocytes	3110.51	Female total carcass cells	2516.2		FALSE	FALSE	FALSE
Anogam_AGAP007633	-0.637156	0.522035693634305	-1.22052126447481	0.222267333494262	0.366517221001335	Fem.Oenocytes vs Female total carcass cells	Female Oenocytes	3110.11	Female total carcass cells	5174.85	solute carrier family 36 (proton-coupled amino acid transporter)	FALSE	FALSE	FALSE
Anogam_AGAP003439	-0.54135	0.2702562409399	-2.00309935297676	0.0451666254374377	0.114279157140421	Fem.Oenocytes vs Female total carcass cells	Female Oenocytes	3105.14	Female total carcass cells	4827.84		FALSE	FALSE	FALSE
Anogam_AGAP005652	-0.00349671	0.246100550113468	-0.01420847090916	0.988663661861458	0.993616205497146	Fem.Oenocytes vs Female total carcass cells	Female Oenocytes	3090.96	Female total carcass cells	3310.72	ATP-dependent RNA helicase DDX5-DBP2	FALSE	FALSE	FALSE
Anogam_AGAP006348	-0.0240562	0.921790298351144	-0.0260973016444713	NA	NA	Fem.Oenocytes vs Female total carcass cells	Female Oenocytes	3081.96	Female total carcass cells	3345.91	LRIM1 leucine-rich immune protein (Long)	FALSE	FALSE	FALSE
Anogam_AGAP006360	0.812254	0.584658731631181	1.38927894390127	0.164747944149091	0.295633280346107	Fem.Oenocytes vs Female total carcass cells	Female Oenocytes	3069.98	Female total carcass cells	1866.38	glutamate synthase (NADPH-NADH)	FALSE	FALSE	FALSE
Anogam_AGAP008328	2.75402	0.739751512640192	3.7229000374316	0.000196947511988621	0.00147631277851104	Fem.Oenocytes vs Female total carcass cells	Female Oenocytes	3068.21	Female total carcass cells	488.086		FALSE	FALSE	FALSE
Anogam_AGAP011334	0.456443	0.565549849449358	0.807079163201485	0.419620876034838	0.570497050702693	Fem.Oenocytes vs Female total carcass cells	Female Oenocytes	3066.8	Female total carcass cells	2387.23	Failed axon connections protein	FALSE	FALSE	FALSE
Anogam_AGAP002969	-0.597986	0.341194042967744	-1.75262758279115	0.0796659534866306	0.173434475760682	Fem.Oenocytes vs Female total carcass cells	Female Oenocytes	3065.32	Female total carcass cells	4962.32	asparaginyl-tRNA synthetase	FALSE	FALSE	FALSE
Anogam_AGAP008036	1.90025	0.262191899464709	7.24756659373766	4.24325840559201e-13	4.99046206965718e-11	Fem.Oenocytes vs Female total carcass cells	Female Oenocytes	3061.61	Female total carcass cells	877.712		TRUE	FALSE	TRUE
Anogam_AGAP009554	0.629337	0.359798474373964	1.74913652319001	0.0802674232673596	0.174409911843624	Fem.Oenocytes vs Female total carcass cells	Female Oenocytes	3061.4	Female total carcass cells	2117.53		FALSE	FALSE	FALSE
Anogam_AGAP000385	1.96748	0.467947131381092	4.20448291297338	2.61679705225275e-05	0.0002715524080999	Fem.Oenocytes vs Female total carcass cells	Female Oenocytes	3056.2	Female total carcass cells	834.209		TRUE	FALSE	TRUE
Anogam_AGAP008327	1.33505	0.293586953271782	4.54737042245777	5.43203433733821e-06	7.20889433717829e-05	Fem.Oenocytes vs Female total carcass cells	Female Oenocytes	3054.69	Female total carcass cells	1294.99	DnaJ homolog subfamily B member 11	TRUE	FALSE	TRUE
Anogam_AGAP011859	2.30989	0.46524828811652	4.96486313316798	6.87495363228458e-07	1.20452954735507e-05	Fem.Oenocytes vs Female total carcass cells	Female Oenocytes	3052.53	Female total carcass cells	657.37	Beta-glucuronidase	TRUE	FALSE	TRUE
Anogam_AGAP010445	1.91164	0.39693104198594	4.8160580172835	1.4642196738061e-06	2.27688384534711e-05	Fem.Oenocytes vs Female total carcass cells	Female Oenocytes	3050.53	Female total carcass cells	867.383	Rab11 family-interacting protein 3-4	TRUE	FALSE	TRUE
Anogam_AGAP011560	3.60447	0.587882545989495	6.13127052740738	8.71800141432911e-10	3.55388806659026e-08	Fem.Oenocytes vs Female total carcass cells	Female Oenocytes	3049.34	Female total carcass cells	267.673		TRUE	FALSE	TRUE
Anogam_AGAP001703	1.77272	0.312936350192914	5.66479809106581	1.47197759542021e-08	4.24261260741961e-07	Fem.Oenocytes vs Female total carcass cells	Female Oenocytes	3045.4	Female total carcass cells	953.945	AP-2 complex subunit sigma	TRUE	FALSE	TRUE
Anogam_AGAP004775	1.86187	0.445163284699291	4.18244422216419	2.88391784446377e-05	0.00029567382148851	Fem.Oenocytes vs Female total carcass cells	Female Oenocytes	3045.24	Female total carcass cells	894.739	Xaa-Pro dipeptidase	TRUE	FALSE	TRUE
Anogam_AGAP007593	1.65777	0.292123355578845	5.67489406576222	1.38774506505231e-08	4.02249504408365e-07	Fem.Oenocytes vs Female total carcass cells	Female Oenocytes	3043.23	Female total carcass cells	1032.28	glycerol-3-phosphate dehydrogenase (NAD+)	TRUE	FALSE	TRUE
Anogam_AGAP006660	1.2827	0.548588705232075	2.33817503165598	0.0193781701896207	0.0600113309262103	Fem.Oenocytes vs Female total carcass cells	Female Oenocytes	3040.27	Female total carcass cells	1338.6	Isocitrate dehydrogenase [NADP]	FALSE	FALSE	FALSE
Anogam_AGAP000440	1.37265	0.450816265386389	3.04480166085316	0.0023283380165283	0.0111900209418119	Fem.Oenocytes vs Female total carcass cells	Female Oenocytes	3022.55	Female total carcass cells	1249.64	ABCD2 ATP-binding cassette transporter (ABC transporter) family D member 2	FALSE	FALSE	FALSE
Anogam_AGAP008724	-0.832233	0.310514012447539	-2.68018008595001	0.00735825618645558	0.0280199766653567	Fem.Oenocytes vs Female total carcass cells	Female Oenocytes	3020.06	Female total carcass cells	5752.65	mitochondrial cytochrome c oxidase subunit 5B isoform 1	FALSE	FALSE	FALSE
Anogam_AGAP007621	-0.541992	0.338561487417373	-1.60086586202808	0.109406632138713	0.219155963203468	Fem.Oenocytes vs Female total carcass cells	Female Oenocytes	3013.46	Female total carcass cells	4695.16	cytochrome c oxidase VIIc	FALSE	FALSE	FALSE
Anogam_AGAP007841	-1.23692	0.30015112926288	-4.12100218814475	3.77227842402303e-05	0.000366900692344141	Fem.Oenocytes vs Female total carcass cells	Female Oenocytes	3013.29	Female total carcass cells	7593.15	F-type H+-transporting ATPase subunit delta	FALSE	TRUE	TRUE
Anogam_AGAP010174	0.788168	0.262216218962506	3.00579593678217	0.00264886697895606	0.0124098932823619	Fem.Oenocytes vs Female total carcass cells	Female Oenocytes	3004.82	Female total carcass cells	1861.21	oligosaccharyltransferase complex subunit alpha (ribophorin I)	FALSE	FALSE	FALSE
Anogam_AGAP004758	0.184141	0.316561711229499	0.581689713313234	0.560775701638435	0.691862473962416	Fem.Oenocytes vs Female total carcass cells	Female Oenocytes	3003.89	Female total carcass cells	2829.58		FALSE	FALSE	FALSE
Anogam_AGAP002935	-0.260537	0.217406856454044	-1.19838324953568	0.230767850448021	0.376829978580299	Fem.Oenocytes vs Female total carcass cells	Female Oenocytes	2999.78	Female total carcass cells	3842.75	eIF3f Eukaryotic translation initiation factor 3 subunit F	FALSE	FALSE	FALSE
Anogam_AGAP004918	2.18043	1.42884899268028	1.52600592233507	NA	NA	Fem.Oenocytes vs Female total carcass cells	Female Oenocytes	2995.49	Female total carcass cells	702.823	fibrinogen	FALSE	FALSE	FALSE
Anogam_AGAP002862	2.65015	0.252991555804442	10.475270466566	1.12216369729066e-25	1.91366315844633e-22	Fem.Oenocytes vs Female total carcass cells	Female Oenocytes	2987.24	Female total carcass cells	509.455	CYP6AA1 cytochrome P450	TRUE	FALSE	TRUE
Anogam_AGAP003663	-0.797473	0.341831373885897	-2.33294406204955	0.0196510813878479	0.0606179875672173	Fem.Oenocytes vs Female total carcass cells	Female Oenocytes	2976.69	Female total carcass cells	5528.38	ATP-dependent RNA helicase DBP2	FALSE	FALSE	FALSE
Anogam_AGAP005091	0.681301	0.362459813882387	1.87966070190345	0.0601543346376109	0.141331607809882	Fem.Oenocytes vs Female total carcass cells	Female Oenocytes	2971.35	Female total carcass cells	1980.72	protein GDAP2 homolog	FALSE	FALSE	FALSE
Anogam_AGAP010588	-0.305603	0.29086243019665	-1.05068031135032	0.293405441604831	0.444606874149407	Fem.Oenocytes vs Female total carcass cells	Female Oenocytes	2965.98	Female total carcass cells	3916.5	T-complex protein 1 subunit theta	FALSE	FALSE	FALSE
Anogam_AGAP005445	1.26228	0.334531126889186	3.77328178818318	0.000161114139203115	0.00125077380297897	Fem.Oenocytes vs Female total carcass cells	Female Oenocytes	2964.63	Female total carcass cells	1321.76	Ras-related C3 botulinum toxin substrate	FALSE	FALSE	FALSE
Anogam_AGAP004852	0.431661	0.276979861879595	1.55845772645073	0.119124781576088	0.233637102757626	Fem.Oenocytes vs Female total carcass cells	Female Oenocytes	2962.63	Female total carcass cells	2349	Adducin	FALSE	FALSE	FALSE
Anogam_AGAP001002	4.19074	0.821969385805627	5.09841804853729	3.42503754100352e-07	6.50185234128905e-06	Fem.Oenocytes vs Female total carcass cells	Female Oenocytes	2962.45	Female total carcass cells	173.686	Toll protein	TRUE	FALSE	TRUE
Anogam_AGAP003430	1.17486	0.348697577260792	3.36929269577535	0.000753613558128171	0.00450934147764178	Fem.Oenocytes vs Female total carcass cells	Female Oenocytes	2959.06	Female total carcass cells	1403.05	VhaM8.9 vacuolar H+ ATPase M8.9 accessory subunit	FALSE	FALSE	FALSE
Anogam_AGAP000943	0.675399	0.295942624713177	2.28219526898646	0.0224778142958322	0.0672965134893144	Fem.Oenocytes vs Female total carcass cells	Female Oenocytes	2955.48	Female total carcass cells	1981.31	chloride intracellular channel	FALSE	FALSE	FALSE
Anogam_AGAP004817	0.389842	0.27260490995647	1.43006379990224	0.152698708756172	0.279470554555996	Fem.Oenocytes vs Female total carcass cells	Female Oenocytes	2954.83	Female total carcass cells	2409.3	lig Protein lingerer	FALSE	FALSE	FALSE
Anogam_AGAP004038	-1.81275	0.897186277650608	-2.02048528771523	0.0433330746884025	0.110901455780824	Fem.Oenocytes vs Female total carcass cells	Female Oenocytes	2953.66	Female total carcass cells	11060	HPX8 heme peroxidase 8	FALSE	FALSE	FALSE
Anogam_AGAP003018	1.78011	0.359959106585762	4.94531769891807	7.60197827384286e-07	1.30509130365705e-05	Fem.Oenocytes vs Female total carcass cells	Female Oenocytes	2952.77	Female total carcass cells	919.022	dynamin GTPase	TRUE	FALSE	TRUE
Anogam_AGAP012613	0.684813	0.419677851965318	1.63175890352181	0.102730285895155	0.209347995474851	Fem.Oenocytes vs Female total carcass cells	Female Oenocytes	2942.64	Female total carcass cells	1960.57		FALSE	FALSE	FALSE
Anogam_AGAP011483	1.78256	0.510346012213536	3.49284989984505	0.000477895050246532	0.00310071157522036	Fem.Oenocytes vs Female total carcass cells	Female Oenocytes	2942.04	Female total carcass cells	913.184	phospholipid-transporting ATPase	FALSE	FALSE	FALSE
Anogam_AGAP009889	0.919194	0.377705933581361	2.43362292878623	0.0149485585135999	0.0488669810578769	Fem.Oenocytes vs Female total carcass cells	Female Oenocytes	2936.9	Female total carcass cells	1662.09	cabut	FALSE	FALSE	FALSE
Anogam_AGAP007318	3.68415	0.627653794667104	5.86972306829199	4.36523665161241e-09	1.48389041260127e-07	Fem.Oenocytes vs Female total carcass cells	Female Oenocytes	2921.96	Female total carcass cells	243.216		TRUE	FALSE	TRUE
Anogam_AGAP009944	0.620373	0.246742572144257	2.51425079903956	0.0119285571378196	0.0408750825968421	Fem.Oenocytes vs Female total carcass cells	Female Oenocytes	2915.43	Female total carcass cells	2026.97	Retinal dehydrogenase 2	FALSE	FALSE	FALSE
Anogam_AGAP013161	2.36175	0.344539634207557	6.85480241746191	7.14111497924595e-12	5.62060680520343e-10	Fem.Oenocytes vs Female total carcass cells	Female Oenocytes	2909.35	Female total carcass cells	606.198	fatty-acid amide hydrolase 2	TRUE	FALSE	TRUE
Anogam_AGAP004078	0.381616	0.288302702068097	1.32366418862192	0.185614596905555	0.32189975517587	Fem.Oenocytes vs Female total carcass cells	Female Oenocytes	2905.62	Female total carcass cells	2386.31	DNA topoisomerase I	FALSE	FALSE	FALSE
Anogam_AGAP009154	1.70821	0.431543795766958	3.95836241512536	7.54653913159838e-05	0.000657718810856172	Fem.Oenocytes vs Female total carcass cells	Female Oenocytes	2905.38	Female total carcass cells	949.864	ARC-P34 actin-related protein 2-3 complex subunit 2	TRUE	FALSE	TRUE
Anogam_AGAP007259	1.54382	0.345587951991927	4.46722346178484	7.92413449306765e-06	9.87573010146994e-05	Fem.Oenocytes vs Female total carcass cells	Female Oenocytes	2866.75	Female total carcass cells	1053.05	TMEM9 protein	TRUE	FALSE	TRUE
Anogam_AGAP009523	1.96574	0.356793346943618	5.50945226003542	3.59951997995089e-08	9.16176329225311e-07	Fem.Oenocytes vs Female total carcass cells	Female Oenocytes	2865.5	Female total carcass cells	785.404	Major facilitator superfamily domain-containing protein 1	TRUE	FALSE	TRUE
Anogam_AGAP007790	-0.54031	0.369072337087979	-1.46396662994847	0.143203066286925	0.267528532818663	Fem.Oenocytes vs Female total carcass cells	Female Oenocytes	2861.64	Female total carcass cells	4445.61	sodium-potassium-transporting ATPase subunit beta	FALSE	FALSE	FALSE
Anogam_AGAP029101	2.56099	0.21967101579964	11.6583003839679	2.08155951091821e-31	5.32462922892877e-28	Fem.Oenocytes vs Female total carcass cells	Female Oenocytes	2846.94	Female total carcass cells	515.71		TRUE	FALSE	TRUE
Anogam_AGAP012102	1.21669	0.272142202003886	4.47079177241357	7.79305460101283e-06	9.75991856518522e-05	Fem.Oenocytes vs Female total carcass cells	Female Oenocytes	2839.37	Female total carcass cells	1307.15		TRUE	FALSE	TRUE
Anogam_AGAP011131	-0.878688	0.330170611489192	-2.66131509318112	0.00778360794427898	0.0292156553506465	Fem.Oenocytes vs Female total carcass cells	Female Oenocytes	2835.67	Female total carcass cells	5576.02	F-type H+-transporting ATPase subunit d	FALSE	FALSE	FALSE
Anogam_AGAP009522	1.92474	0.555870400743321	3.46257388005619	0.000535035003712262	0.00338557709213597	Fem.Oenocytes vs Female total carcass cells	Female Oenocytes	2833.72	Female total carcass cells	797.079	fibronectin type-III domain-containing protein 3a	FALSE	FALSE	FALSE
Anogam_AGAP007685	2.08667	0.433474681380164	4.8138278245615	1.48066389533969e-06	2.29896099804487e-05	Fem.Oenocytes vs Female total carcass cells	Female Oenocytes	2831.03	Female total carcass cells	713.114		TRUE	FALSE	TRUE
Anogam_AGAP009051	2.02393	0.480654356356599	4.21078362089792	2.54486406993522e-05	0.000264893684268334	Fem.Oenocytes vs Female total carcass cells	Female Oenocytes	2830.25	Female total carcass cells	742.935	LL1 lipopolysaccharide-induced TNF-alpha transcription factor (LITAF-like 1)	TRUE	FALSE	TRUE
Anogam_AGAP001315	0.733479	0.220568832200421	3.32539723302848	0.00088292642443683	0.00512718681886359	Fem.Oenocytes vs Female total carcass cells	Female Oenocytes	2821.96	Female total carcass cells	1815.19		FALSE	FALSE	FALSE
Anogam_AGAP010641	2.27979	0.71480695359386	3.18938027466118	0.00142578184988423	0.00754712875737996	Fem.Oenocytes vs Female total carcass cells	Female Oenocytes	2818.88	Female total carcass cells	619.345		FALSE	FALSE	FALSE
Anogam_AGAP009505	-0.471436	0.248815246630232	-1.89472414837642	0.058128956768039	0.137689545290379	Fem.Oenocytes vs Female total carcass cells	Female Oenocytes	2816.7	Female total carcass cells	4173.76	T-complex protein 12C delta subunit	FALSE	FALSE	FALSE
Anogam_AGAP008137	1.55566	0.584822285195389	2.66006031670971	0.00781266589799449	0.0292975546758685	Fem.Oenocytes vs Female total carcass cells	Female Oenocytes	2811.79	Female total carcass cells	1021.36	Niemann-Pick C1 protein	FALSE	FALSE	FALSE
Anogam_AGAP009604	0.10941	0.426093276533954	0.25677450399429	0.797352853176217	0.869640446712935	Fem.Oenocytes vs Female total carcass cells	Female Oenocytes	2811.26	Female total carcass cells	2783.6		FALSE	FALSE	FALSE
Anogam_AGAP010612	-1.18715	0.253091878147805	-4.69057554063083	2.72437621012882e-06	3.94283131287668e-05	Fem.Oenocytes vs Female total carcass cells	Female Oenocytes	2811.1	Female total carcass cells	6840.78	elongation factor 1-beta	FALSE	TRUE	TRUE
Anogam_AGAP002884	0.267599	0.33762775981306	0.792585249443811	0.42801950551331	0.577541287143899	Fem.Oenocytes vs Female total carcass cells	Female Oenocytes	2801.91	Female total carcass cells	2490.59	V-type H+-transporting ATPase subunit B	FALSE	FALSE	FALSE
Anogam_AGAP004692	0.300808	0.279151839971062	1.07757725278246	0.28122245810401	0.431533921913652	Fem.Oenocytes vs Female total carcass cells	Female Oenocytes	2791.43	Female total carcass cells	2423.19		FALSE	FALSE	FALSE
Anogam_AGAP005971	0.326494	0.453079334460022	0.720611774542732	0.471148407399216	0.615955012874975	Fem.Oenocytes vs Female total carcass cells	Female Oenocytes	2789.58	Female total carcass cells	2378.68		FALSE	FALSE	FALSE
Anogam_AGAP011948	-2.471	0.612554636773603	-4.03392353668632	5.48531738858702e-05	0.0005024953347335	Fem.Oenocytes vs Female total carcass cells	Female Oenocytes	2774.68	Female total carcass cells	16390	threonine 3-dehydrogenase	FALSE	TRUE	TRUE
Anogam_AGAP010557	0.173856	0.295580878431792	0.588184103474529	0.55640872620051	0.689372087796036	Fem.Oenocytes vs Female total carcass cells	Female Oenocytes	2771.15	Female total carcass cells	2626.39	B-cell receptor-associated protein 31	FALSE	FALSE	FALSE
Anogam_AGAP006508	1.91888	0.340974268726472	5.62764812372766	1.82683271220683e-08	5.13520667892865e-07	Fem.Oenocytes vs Female total carcass cells	Female Oenocytes	2768.49	Female total carcass cells	782.694	small calcium-binding mitochondrial carrier protein 3	TRUE	FALSE	TRUE
Anogam_AGAP007050	-1.13697	0.308215015947366	-3.68890164844186	0.000225224256217454	0.00165078408998352	Fem.Oenocytes vs Female total carcass cells	Female Oenocytes	2763.07	Female total carcass cells	6489.78	Nucleolar GTP-binding protein 1	FALSE	FALSE	FALSE
Anogam_AGAP004238	-0.289447	0.279509204777381	-1.03555514401582	0.300409727674944	0.452028284348533	Fem.Oenocytes vs Female total carcass cells	Female Oenocytes	2756.95	Female total carcass cells	3600.84	T-complex protein 1 subunit alpha	FALSE	FALSE	FALSE
Anogam_AGAP003139	-0.336217	0.422595767466264	-0.795600722074061	0.426264146766986	0.576183301407222	Fem.Oenocytes vs Female total carcass cells	Female Oenocytes	2753.37	Female total carcass cells	3713.22	SRPN9 serine protease inhibitor (serpin) 9	FALSE	FALSE	FALSE
Anogam_AGAP007640	1.48749	0.287064468017413	5.1817412794323	2.19823991101139e-07	4.40164202925021e-06	Fem.Oenocytes vs Female total carcass cells	Female Oenocytes	2742.12	Female total carcass cells	1045.41		TRUE	FALSE	TRUE
Anogam_AGAP010337	-0.170641	0.302928506447585	-0.56330452800092	0.573227535337594	0.701754503658084	Fem.Oenocytes vs Female total carcass cells	Female Oenocytes	2741.56	Female total carcass cells	3302.01	ubiquinol-cytochrome c reductase subunit 8	FALSE	FALSE	FALSE
Anogam_AGAP028360	0.316294	0.278291592951362	1.13655725588974	0.25572341742487	0.404477045461628	Fem.Oenocytes vs Female total carcass cells	Female Oenocytes	2726.19	Female total carcass cells	2340.92	ND2 NADH dehydrogenase subunit 2	FALSE	FALSE	FALSE
Anogam_AGAP001874	1.34176	0.433428008228567	3.09569072426817	0.00196355048632342	0.00972461208909062	Fem.Oenocytes vs Female total carcass cells	Female Oenocytes	2722.04	Female total carcass cells	1148.62	Ras-related protein Rap-1A	FALSE	FALSE	FALSE
Anogam_AGAP004598	-0.905224	0.319640331050207	-2.83200814216346	0.00462566707769427	0.0194213481899744	Fem.Oenocytes vs Female total carcass cells	Female Oenocytes	2719.35	Female total carcass cells	5450.14	Phosphoserine aminotransferase	FALSE	FALSE	FALSE
Anogam_AGAP012717	0.972301	0.246077569990603	3.95119894688161	7.77606472763301e-05	0.00067370613288011	Fem.Oenocytes vs Female total carcass cells	Female Oenocytes	2711.79	Female total carcass cells	1478.79	vesicle transport protein SEC22	FALSE	FALSE	FALSE
Anogam_AGAP004532	1.09752	0.412881147485613	2.6582011842541	0.00785589814104551	0.0294222363759801	Fem.Oenocytes vs Female total carcass cells	Female Oenocytes	2702.37	Female total carcass cells	1351.08	3-ketoacyl-CoA reductase	FALSE	FALSE	FALSE
Anogam_AGAP000562	0.500765	0.35896726409524	1.39501571398587	0.163011100988543	0.293442924932226	Fem.Oenocytes vs Female total carcass cells	Female Oenocytes	2693.12	Female total carcass cells	2034.79	Moe Moesin-ezrin-radixin homolog 1	FALSE	FALSE	FALSE
Anogam_AGAP001930	0.227775	0.391321448612297	0.582067423809355	0.560521266656899	0.691862473962416	Fem.Oenocytes vs Female total carcass cells	Female Oenocytes	2692.05	Female total carcass cells	2455.93	heterogeneous nuclear ribonucleoprotein 27C	FALSE	FALSE	FALSE
Anogam_AGAP005964	2.81867	0.290035463227414	9.71836885647583	2.51782375607545e-22	3.2202965840205e-19	Fem.Oenocytes vs Female total carcass cells	Female Oenocytes	2688.24	Female total carcass cells	408.112		TRUE	FALSE	TRUE
Anogam_AGAP002762	-0.381131	0.327613084309444	-1.16335753432174	0.244684471411278	0.392231162694689	Fem.Oenocytes vs Female total carcass cells	Female Oenocytes	2670.94	Female total carcass cells	3714.59	T-complex protein 1 subunit eta	FALSE	FALSE	FALSE
Anogam_AGAP002597	1.47116	0.297609654863268	4.94326933835535	7.68232320018504e-07	1.31667556087593e-05	Fem.Oenocytes vs Female total carcass cells	Female Oenocytes	2669.79	Female total carcass cells	1029.78	proteasome activator subunit 4	TRUE	FALSE	TRUE
Anogam_AGAP000719	-1.66559	0.321977613661996	-5.17299091840138	2.3037621496555e-07	4.55939928728725e-06	Fem.Oenocytes vs Female total carcass cells	Female Oenocytes	2669.24	Female total carcass cells	9056.66	Ahcy13 Adenosylhomocysteinase	FALSE	TRUE	TRUE
Anogam_AGAP003162	1.98106	0.601896982888324	3.29136367757718	0.000997029267905738	0.00567070787615982	Fem.Oenocytes vs Female total carcass cells	Female Oenocytes	2666.74	Female total carcass cells	721.709		FALSE	FALSE	FALSE
Anogam_AGAP002752	1.12402	0.286219820248778	3.92713161183991	8.59649458826772e-05	0.00073483151735301	Fem.Oenocytes vs Female total carcass cells	Female Oenocytes	2658.95	Female total carcass cells	1304.53	DnaJ (Hsp40) homolog2C subfamily C2C member 3	TRUE	FALSE	TRUE
Anogam_AGAP010304	0.327652	0.244529948554045	1.33992731716748	0.180268976003348	0.315787050584875	Fem.Oenocytes vs Female total carcass cells	Female Oenocytes	2656.86	Female total carcass cells	2263.84		FALSE	FALSE	FALSE
Anogam_AGAP003047	0.114173	0.405245836462646	0.281737773739473	0.778144587987172	0.857140211463531	Fem.Oenocytes vs Female total carcass cells	Female Oenocytes	2655.44	Female total carcass cells	2621.06	ATP-dependent RNA helicase	FALSE	FALSE	FALSE
Anogam_AGAP002107	1.55397	0.292783757584783	5.30757182617528	1.11095233505763e-07	2.4445729660881e-06	Fem.Oenocytes vs Female total carcass cells	Female Oenocytes	2650.82	Female total carcass cells	965.152	calcyclin binding protein	TRUE	FALSE	TRUE
Anogam_AGAP010398	0.923095	2.02017228274601	0.456938683675448	0.647715118367349	0.759763967801756	Fem.Oenocytes vs Female total carcass cells	Female Oenocytes	2646.86	Female total carcass cells	1489.13	Flavin-containing monooxygenase FMO GS-OX-like 1	FALSE	FALSE	FALSE
Anogam_AGAP004836	2.05615	0.609654469857511	3.37265359423302	0.00074447550672729	0.00446249173100974	Fem.Oenocytes vs Female total carcass cells	Female Oenocytes	2642.07	Female total carcass cells	680.932		FALSE	FALSE	FALSE
Anogam_AGAP010821	2.38084	0.383189683288579	6.21321816985534	5.19102955145499e-10	2.24112296921888e-08	Fem.Oenocytes vs Female total carcass cells	Female Oenocytes	2641.57	Female total carcass cells	542.6		TRUE	FALSE	TRUE
Anogam_AGAP007499	2.35801	0.510436622229621	4.61958455200736	3.84509167344538e-06	5.3094437250598e-05	Fem.Oenocytes vs Female total carcass cells	Female Oenocytes	2639.71	Female total carcass cells	550.6	chloride channel 7	TRUE	FALSE	TRUE
Anogam_AGAP001174	1.39899	0.573363807832505	2.4399709357238	0.0146884436104888	0.0482169249350407	Fem.Oenocytes vs Female total carcass cells	Female Oenocytes	2637.37	Female total carcass cells	1068.2	14.5 kDa salivary peptide	FALSE	FALSE	FALSE
Anogam_AGAP000044	0.641439	0.322432731793821	1.98937220125944	0.0466601356445047	0.116958968131938	Fem.Oenocytes vs Female total carcass cells	Female Oenocytes	2635.19	Female total carcass cells	1804.86	thioredoxin domain-containing protein	FALSE	FALSE	FALSE
Anogam_AGAP003553	1.10215	0.263216120723415	4.18724529585635	2.82360610783927e-05	0.000290071663608549	Fem.Oenocytes vs Female total carcass cells	Female Oenocytes	2634.52	Female total carcass cells	1311.82	Transmembrane emp24 protein transport domain containing 9	TRUE	FALSE	TRUE
Anogam_AGAP012185	2.73817	0.375522182930463	7.29162818698031	3.06231325469486e-13	3.77513123157082e-11	Fem.Oenocytes vs Female total carcass cells	Female Oenocytes	2630.22	Female total carcass cells	421.761	erythrocyte membrane protein band 4.1	TRUE	FALSE	TRUE
Anogam_AGAP005848	0.598521	1.4341795886864	0.417326515537175	NA	NA	Fem.Oenocytes vs Female total carcass cells	Female Oenocytes	2623.82	Female total carcass cells	1850.29	ficolin A	FALSE	FALSE	FALSE
Anogam_AGAP006608	2.28725	0.504911495097538	4.5300016288872	5.89832317078888e-06	7.71760136617799e-05	Fem.Oenocytes vs Female total carcass cells	Female Oenocytes	2622.93	Female total carcass cells	574.273		TRUE	FALSE	TRUE
Anogam_AGAP006427	2.05365	0.707445768650397	2.90290127452348	0.00369723168488976	0.0162082581832871	Fem.Oenocytes vs Female total carcass cells	Female Oenocytes	2609.69	Female total carcass cells	671.045	ABCC7 ATP-binding cassette transporter (ABC transporter) family C member 7	FALSE	FALSE	FALSE
Anogam_AGAP008727	-0.89081	0.336967912540149	-2.64360378762933	0.00820286131342448	0.030388007588327	Fem.Oenocytes vs Female total carcass cells	Female Oenocytes	2605.62	Female total carcass cells	5167.29	cytochrome c oxidase subunit 42C mitochondrial precursor	FALSE	FALSE	FALSE
Anogam_AGAP006614	-0.307095	0.306898124423212	-1.00064057810437	0.317000604857198	0.46994684136362	Fem.Oenocytes vs Female total carcass cells	Female Oenocytes	2594.89	Female total carcass cells	3435.26	transcription factor BTF3 homolog 4	FALSE	FALSE	FALSE
Anogam_AGAP004596	-1.13536	0.382545214148468	-2.96791321906161	0.00299828968543482	0.0136591718884101	Fem.Oenocytes vs Female total carcass cells	Female Oenocytes	2594.3	Female total carcass cells	6100.17	PyK pyruvate kinase	FALSE	FALSE	FALSE
Anogam_AGAP011157	0.196562	0.250932240173002	0.783326454913826	0.433435431882721	0.582544507950086	Fem.Oenocytes vs Female total carcass cells	Female Oenocytes	2594.04	Female total carcass cells	2420.38	cytosolic prostaglandin-E synthase	FALSE	FALSE	FALSE
Anogam_AGAP006690	3.61016	0.802117465767683	4.50078800812484	6.77020022705661e-06	8.66992349477387e-05	Fem.Oenocytes vs Female total carcass cells	Female Oenocytes	2592.67	Female total carcass cells	226.325	BTB (POZ) domain containing 9	TRUE	FALSE	TRUE
Anogam_AGAP010638	1.10691	0.291052764189629	3.80313424172214	0.000142876881353787	0.00113063901779733	Fem.Oenocytes vs Female total carcass cells	Female Oenocytes	2586.59	Female total carcass cells	1284.97	Ca2+ transporting ATPase2C plasma membrane	FALSE	FALSE	FALSE
Anogam_AGAP009572	-0.531301	0.288623047435245	-1.84081117247795	0.0656492349902558	0.150543023850358	Fem.Oenocytes vs Female total carcass cells	Female Oenocytes	2585.03	Female total carcass cells	3994.27	RpS15a-2 40S ribosomal protein S15a	FALSE	FALSE	FALSE
Anogam_AGAP002473	1.22007	0.399502570318183	3.05396306141252	0.00225839886346176	0.0108999703636513	Fem.Oenocytes vs Female total carcass cells	Female Oenocytes	2584.55	Female total carcass cells	1188.31	VATF V-type proton ATPase subunit F	FALSE	FALSE	FALSE
Anogam_AGAP001600	2.89536	0.443229948016534	6.53242048626468	6.47151568044937e-11	3.67869713568655e-09	Fem.Oenocytes vs Female total carcass cells	Female Oenocytes	2581.68	Female total carcass cells	372.206	Ser-Thr protein phosphatase-nucleotidase	TRUE	FALSE	TRUE
Anogam_AGAP004294	0.509137	0.2513114064017	2.02592126703286	0.0427728535051794	0.109907543210697	Fem.Oenocytes vs Female total carcass cells	Female Oenocytes	2579.91	Female total carcass cells	1938.86	Ubqn ubiquilin	FALSE	FALSE	FALSE
Anogam_AGAP010815	-1.4072	0.783018742272381	-1.79714551537529	0.0723125215494172	0.161559180702988	Fem.Oenocytes vs Female total carcass cells	Female Oenocytes	2571.33	Female total carcass cells	7281.17	TEP1 thioester-containing protein 1	FALSE	FALSE	FALSE
Anogam_AGAP002401	0.42465	0.282752764927505	1.50184214800628	0.133137880317693	0.253964726213766	Fem.Oenocytes vs Female total carcass cells	Female Oenocytes	2568.57	Female total carcass cells	2047.82	V-type H+-transporting ATPase subunit E	FALSE	FALSE	FALSE
Anogam_AGAP007768	-0.568567	0.332320229932592	-1.71090145696515	0.0870993056251562	0.184781276209123	Fem.Oenocytes vs Female total carcass cells	Female Oenocytes	2566.98	Female total carcass cells	4073.86	mitochondrial cytochrome c oxidase subunit VIC	FALSE	FALSE	FALSE
Anogam_AGAP003599	-1.26779	0.294317361325827	-4.30754568580419	1.6507600736143e-05	0.000185610737068369	Fem.Oenocytes vs Female total carcass cells	Female Oenocytes	2564.57	Female total carcass cells	6603.44	F-type H+-transporting ATPase oligomycin sensitivity conferral protein	FALSE	TRUE	TRUE
Anogam_AGAP010553	0.652877	0.295988743397279	2.20574788569972	0.0274016570432979	0.0781856538948756	Fem.Oenocytes vs Female total carcass cells	Female Oenocytes	2561.49	Female total carcass cells	1740.32	poly(U)-binding-splicing factor PUF60	FALSE	FALSE	FALSE
Anogam_AGAP008914	0.0959805	0.286196757588174	0.335365351393076	0.737349501650337	0.82751511514981	Fem.Oenocytes vs Female total carcass cells	Female Oenocytes	2560.83	Female total carcass cells	2562.21		FALSE	FALSE	FALSE
Anogam_AGAP028038	3.17014	0.483389359116703	6.55815153871702	5.44788337800927e-11	3.25565186059598e-09	Fem.Oenocytes vs Female total carcass cells	Female Oenocytes	2559.77	Female total carcass cells	305.201		TRUE	FALSE	TRUE
Anogam_AGAP005759	2.72803	0.546581482340287	4.99107090448954	6.00454490802875e-07	1.07222519195375e-05	Fem.Oenocytes vs Female total carcass cells	Female Oenocytes	2558.69	Female total carcass cells	413.127		TRUE	FALSE	TRUE
Anogam_AGAP006904	2.22137	0.572462370986141	3.88037720234711	0.000104294591493596	0.000871848251766724	Fem.Oenocytes vs Female total carcass cells	Female Oenocytes	2552.59	Female total carcass cells	584.686	MMP1 matrix metalloprotease 1	TRUE	FALSE	TRUE
Anogam_AGAP001367	3.62054	0.399527785207326	9.06205920622947	1.28010681886115e-19	1.00754253619902e-16	Fem.Oenocytes vs Female total carcass cells	Female Oenocytes	2550.63	Female total carcass cells	221.941	beta-12C3-glucuronyltransferase	TRUE	FALSE	TRUE
Anogam_AGAP005820	3.73032	0.414514518784742	8.99924971667068	2.27265449403773e-19	1.55025338553294e-16	Fem.Oenocytes vs Female total carcass cells	Female Oenocytes	2545.91	Female total carcass cells	205.135		TRUE	FALSE	TRUE
Anogam_AGAP008249	-0.445778	0.208797830603754	-2.13497564121588	0.0327629998828834	0.0894178514188792	Fem.Oenocytes vs Female total carcass cells	Female Oenocytes	2542.42	Female total carcass cells	3701.34	T-complex protein2C epsilon subunit	FALSE	FALSE	FALSE
Anogam_AGAP028164	-0.550035	0.475508295082966	-1.15672983783236	0.247382755125796	0.395379623624984	Fem.Oenocytes vs Female total carcass cells	Female Oenocytes	2541.53	Female total carcass cells	3981.21		FALSE	FALSE	FALSE
Anogam_AGAP004197	0.477261	0.482351940556179	0.989445570015844	0.322445188070694	0.475260611400077	Fem.Oenocytes vs Female total carcass cells	Female Oenocytes	2535.72	Female total carcass cells	1950.12	6-phosphogluconate dehydrogenase2C decarboxylating	FALSE	FALSE	FALSE
Anogam_AGAP007958	1.83813	0.50642628841765	3.62960889317031	0.000283850970157255	0.00201412144705203	Fem.Oenocytes vs Female total carcass cells	Female Oenocytes	2534.33	Female total carcass cells	759.3	acyl-CoA oxidase	FALSE	FALSE	FALSE
Anogam_AGAP005528	0.935917	0.298967635275106	3.13049492361353	0.00174512015452404	0.0088659729002433	Fem.Oenocytes vs Female total carcass cells	Female Oenocytes	2522.11	Female total carcass cells	1410.49		FALSE	FALSE	FALSE
Anogam_AGAP006040	1.28019	0.408542728519525	3.13354436363631	0.00172708808540638	0.00880058032364447	Fem.Oenocytes vs Female total carcass cells	Female Oenocytes	2520.48	Female total carcass cells	1111.13	peroxisomal membrane protein 2	FALSE	FALSE	FALSE
Anogam_AGAP003893	0.183162	0.312243246093315	0.586601705256947	0.557471237144995	0.690061178135445	Fem.Oenocytes vs Female total carcass cells	Female Oenocytes	2518.62	Female total carcass cells	2374.04	C-terminal-binding protein	FALSE	FALSE	FALSE
Anogam_AGAP004592	0.303641	0.253447599127018	1.19804099161814	0.230901059152408	0.376927191647644	Fem.Oenocytes vs Female total carcass cells	Female Oenocytes	2511.73	Female total carcass cells	2175.14	splicing factor2C arginine-serine-rich 4-5-6	FALSE	FALSE	FALSE
Anogam_AGAP011315	2.11587	0.294351162340587	7.18825777867794	6.56232787467502e-13	7.21997191544891e-11	Fem.Oenocytes vs Female total carcass cells	Female Oenocytes	2509.63	Female total carcass cells	619.698	fatty-acid amide hydrolase 2	TRUE	FALSE	TRUE
Anogam_AGAP007393	0.804462	0.353322170410906	2.27685111758396	0.0227951177842518	0.067960269571231	Fem.Oenocytes vs Female total carcass cells	Female Oenocytes	2504.01	Female total carcass cells	1531.91	protein disulfide isomerase family A2C member 3	FALSE	FALSE	FALSE
Anogam_AGAP002020	-0.725882	0.314805570853248	-2.30581106804409	0.0211211915134493	0.0641472340651865	Fem.Oenocytes vs Female total carcass cells	Female Oenocytes	2501.72	Female total carcass cells	4425.6	NADH dehydrogenase (ubiquinone) 1 beta subcomplex 8	FALSE	FALSE	FALSE
Anogam_AGAP007751	-1.41295	0.427297837624582	-3.30670951858231	0.00094398726222443	0.00541416909589706	Fem.Oenocytes vs Female total carcass cells	Female Oenocytes	2497.23	Female total carcass cells	7113.87		FALSE	FALSE	FALSE
Anogam_AGAP002337	-0.921407	0.233679429733712	-3.9430365824061	8.04563770791404e-05	0.000691789622078793	Fem.Oenocytes vs Female total carcass cells	Female Oenocytes	2496.97	Female total carcass cells	5055.11	eIF3d Eukaryotic translation initiation factor 3 subunit D	FALSE	FALSE	FALSE
Anogam_AGAP000290	1.88738	0.485783267268689	3.88522523935821	0.000102235059161198	0.000856731470382786	Fem.Oenocytes vs Female total carcass cells	Female Oenocytes	2496.42	Female total carcass cells	720.412	CLIPA27 CLIP-domain serine protease	TRUE	FALSE	TRUE
Anogam_AGAP000883	-1.19637	0.253389506878474	-4.72145199019458	2.34166909115987e-06	3.45742541713532e-05	Fem.Oenocytes vs Female total carcass cells	Female Oenocytes	2495.38	Female total carcass cells	6114.55	elongation factor 1-gamma	FALSE	TRUE	TRUE
Anogam_AGAP005110	1.24906	0.46563265389979	2.682504510849	0.00730731663254624	0.0278467276663736	Fem.Oenocytes vs Female total carcass cells	Female Oenocytes	2484.92	Female total carcass cells	1116.94	Actincytosk	FALSE	FALSE	FALSE
Anogam_AGAP008482	0.634501	0.304665538132824	2.08261451767048	0.0372863748377403	0.0988891102487711	Fem.Oenocytes vs Female total carcass cells	Female Oenocytes	2484.91	Female total carcass cells	1712.76	chromodomain-helicase-DNA-binding protein 7	FALSE	FALSE	FALSE
Anogam_AGAP002352	0.440215	0.315464846427256	1.39544965720054	0.162880285844159	0.293362275084921	Fem.Oenocytes vs Female total carcass cells	Female Oenocytes	2484.74	Female total carcass cells	1957.05		FALSE	FALSE	FALSE
Anogam_AGAP001107	1.40388	0.396869682627171	3.53738258358388	0.000404113824091059	0.00270077899941196	Fem.Oenocytes vs Female total carcass cells	Female Oenocytes	2475.98	Female total carcass cells	1001.4		FALSE	FALSE	FALSE
Anogam_AGAP010189	1.04368	0.334675473359946	3.1184869998434	0.00181782161188662	0.00917609804283368	Fem.Oenocytes vs Female total carcass cells	Female Oenocytes	2470.53	Female total carcass cells	1281.73		FALSE	FALSE	FALSE
Anogam_AGAP011294	3.74623	0.919847446075333	4.07266367381506	NA	NA	Fem.Oenocytes vs Female total carcass cells	Female Oenocytes	2470.34	Female total carcass cells	196.571	DEF1 defensin anti-microbial peptide	FALSE	FALSE	FALSE
Anogam_AGAP004397	2.80944	0.609205612263194	4.61163898464265	3.99506400562962e-06	5.49428694967772e-05	Fem.Oenocytes vs Female total carcass cells	Female Oenocytes	2469.6	Female total carcass cells	377.885	alpha-12C6-mannosyl-glycoprotein beta-12C2-N-acetylglucosaminyltransferase	TRUE	FALSE	TRUE
Anogam_AGAP010142	2.68272	0.396061929529909	6.77347871790074	1.2572207712585e-11	9.12332122802624e-10	Fem.Oenocytes vs Female total carcass cells	Female Oenocytes	2457.67	Female total carcass cells	409.389	Dat dopamine N-acetyltransferase	TRUE	FALSE	TRUE
Anogam_AGAP002414	0.548092	0.295077824333172	1.85745020772488	0.0632471289816281	0.146856673405701	Fem.Oenocytes vs Female total carcass cells	Female Oenocytes	2446.33	Female total carcass cells	1788.21	carboxypeptidase D	FALSE	FALSE	FALSE
Anogam_AGAP002054	1.73645	0.35351108885097	4.91199759332181	9.01531598563041e-07	1.50235689193763e-05	Fem.Oenocytes vs Female total carcass cells	Female Oenocytes	2440.61	Female total carcass cells	783.423	fermitin family homolog 2	TRUE	FALSE	TRUE
Anogam_AGAP008889	2.28961	0.427177645380087	5.35984944129969	8.32913372509802e-08	1.88548000608856e-06	Fem.Oenocytes vs Female total carcass cells	Female Oenocytes	2438.8	Female total carcass cells	534.342	ABCG15 ATP-binding cassette transporter (ABC transporter) family G member 15	TRUE	FALSE	TRUE
Anogam_AGAP010427	1.50262	0.45518280258114	3.30114368256734	0.000962915567497933	0.00551345947769381	Fem.Oenocytes vs Female total carcass cells	Female Oenocytes	2436.47	Female total carcass cells	918.452	serine palmitoyltransferase	FALSE	FALSE	FALSE
Anogam_AGAP011478	-2.03965	0.675076507834001	-3.02135987463239	0.00251642082752516	0.0119093514834586	Fem.Oenocytes vs Female total carcass cells	Female Oenocytes	2432.43	Female total carcass cells	10665.1		FALSE	FALSE	FALSE
Anogam_AGAP000897	-0.250095	0.289768509496951	-0.86308673592604	0.388089780135875	0.540029381553187	Fem.Oenocytes vs Female total carcass cells	Female Oenocytes	2431.73	Female total carcass cells	3090.48	coiled-coil-helix-coiled-coil-helix domain-containing protein 22C mitochondrial	FALSE	FALSE	FALSE
Anogam_AGAP010893	1.02294	0.408324715587019	2.50521334222037	0.0122377552573582	0.0417110965334075	Fem.Oenocytes vs Female total carcass cells	Female Oenocytes	2420.05	Female total carcass cells	1272.83	oxysterol-binding protein 1	FALSE	FALSE	FALSE
Anogam_AGAP003008	0.806131	0.310171700780508	2.59898450142958	0.00934999946532708	0.0336982016658072	Fem.Oenocytes vs Female total carcass cells	Female Oenocytes	2419.97	Female total carcass cells	1480.13	26S proteasome regulatory subunit T3	FALSE	FALSE	FALSE
Anogam_AGAP005393	0.889484	0.329429253896413	2.70007716550032	0.00693233950031318	0.0266861165414614	Fem.Oenocytes vs Female total carcass cells	Female Oenocytes	2418.09	Female total carcass cells	1396.14	Ras-related protein Rab-2A	FALSE	FALSE	FALSE
Anogam_AGAP009929	-0.723014	0.265663644752123	-2.72153835909883	0.00649788433741976	0.0253958565853625	Fem.Oenocytes vs Female total carcass cells	Female Oenocytes	2417.91	Female total carcass cells	4264.7	exportin-1	FALSE	FALSE	FALSE
Anogam_AGAP011159	-0.556906	0.347305814939635	-1.60350430684583	0.108823359037499	0.218415184321635	Fem.Oenocytes vs Female total carcass cells	Female Oenocytes	2415.39	Female total carcass cells	3803.27	CoVa cytochrome c oxidase subunit Va	FALSE	FALSE	FALSE
Anogam_AGAP011107	1.14794	0.396436083609402	2.8956407543214	0.00378385296071498	0.0165383953413224	Fem.Oenocytes vs Female total carcass cells	Female Oenocytes	2411.65	Female total carcass cells	1163.22	GRX1 glutaredoxin	FALSE	FALSE	FALSE
Anogam_AGAP004665	3.20282	0.786605484282902	4.07169367370465	4.6672532535129e-05	0.000438524658309862	Fem.Oenocytes vs Female total carcass cells	Female Oenocytes	2408.9	Female total carcass cells	280.69	CYP306A1 cytochrome P450	TRUE	FALSE	TRUE
Anogam_AGAP007784	-0.153463	0.391831891276435	-0.39165593968942	0.695312449308524	0.797046491297873	Fem.Oenocytes vs Female total carcass cells	Female Oenocytes	2394.5	Female total carcass cells	2851.29	enoyl-CoA hydratase - long-chain 3-hydroxyacyl-CoA dehydrogenase	FALSE	FALSE	FALSE
Anogam_AGAP005672	-0.929623	0.373763899030667	-2.48719414551459	0.0128755112806308	0.0435938137889024	Fem.Oenocytes vs Female total carcass cells	Female Oenocytes	2392.22	Female total carcass cells	4861.67	staphylococcal nuclease domain-containing protein 1	FALSE	FALSE	FALSE
Anogam_AGAP012412	1.41575	0.25857938086386	5.47508984038926	4.37289699158222e-08	1.09130443946023e-06	Fem.Oenocytes vs Female total carcass cells	Female Oenocytes	2391.11	Female total carcass cells	959.025	ceramide glucosyltransferase	TRUE	FALSE	TRUE
Anogam_AGAP008473	1.41629	0.414982949554281	3.4128967502911	0.00064276289465549	0.0039523737608864	Fem.Oenocytes vs Female total carcass cells	Female Oenocytes	2390.57	Female total carcass cells	956.54		FALSE	FALSE	FALSE
Anogam_AGAP009202	0.79775	0.326918801156066	2.44020697615629	0.014678849065402	0.0482028932399349	Fem.Oenocytes vs Female total carcass cells	Female Oenocytes	2384.34	Female total carcass cells	1467.9	selenoprotein T	FALSE	FALSE	FALSE
Anogam_AGAP008988	-1.18324	0.38980549618031	-3.03546324589842	0.0024016649322691	0.0114563336069825	Fem.Oenocytes vs Female total carcass cells	Female Oenocytes	2382.63	Female total carcass cells	5784.56	Glutamine synthetase	FALSE	FALSE	FALSE
Anogam_AGAP001610	-0.489497	0.490382701774858	-0.998194844499005	0.318184885913885	0.470771230139333	Fem.Oenocytes vs Female total carcass cells	Female Oenocytes	2372.76	Female total carcass cells	3560.77		FALSE	FALSE	FALSE
Anogam_AGAP002759	-0.369262	0.291112227053245	-1.2684540746031	0.204635841352783	0.345118498223451	Fem.Oenocytes vs Female total carcass cells	Female Oenocytes	2369.39	Female total carcass cells	3269.34	T-complex protein 1 subunit gamma	FALSE	FALSE	FALSE
Anogam_AGAP001896	1.46722	0.364051766757587	4.03026416780082	5.57142027249484e-05	0.000507629316368363	Fem.Oenocytes vs Female total carcass cells	Female Oenocytes	2362.25	Female total carcass cells	912.537		TRUE	FALSE	TRUE
Anogam_AGAP004071	1.70962	0.57836841680371	2.95593213449784	0.00311725673552003	0.0141210115862181	Fem.Oenocytes vs Female total carcass cells	Female Oenocytes	2362.24	Female total carcass cells	771.107	fimbrin	FALSE	FALSE	FALSE
Anogam_AGAP003987	-1.26163	0.330866792225052	-3.81309723137245	0.000137236090782908	0.00109446584636844	Fem.Oenocytes vs Female total carcass cells	Female Oenocytes	2360.08	Female total carcass cells	6050.58	complement component 1 Q subcomponent-binding protein2C mitochondrial	FALSE	FALSE	FALSE
Anogam_AGAP007698	1.9371	0.337050720050544	5.74719188972634	9.0737735697714e-09	2.79647142065967e-07	Fem.Oenocytes vs Female total carcass cells	Female Oenocytes	2351.97	Female total carcass cells	656.578	syntaxin 1A	TRUE	FALSE	TRUE
Anogam_AGAP006612	-0.477194	0.318527421359689	-1.49812667036029	0.134100342980567	0.255039908806163	Fem.Oenocytes vs Female total carcass cells	Female Oenocytes	2348.7	Female total carcass cells	3498.1	RpL29 60S ribosomal protein L29	FALSE	FALSE	FALSE
Anogam_AGAP005581	-1.23612	0.346101422354909	-3.57156734210691	0.00035485127808598	0.00243353771942074	Fem.Oenocytes vs Female total carcass cells	Female Oenocytes	2348.33	Female total carcass cells	5913.1	3-hydroxyisobutyrate dehydrogenase	FALSE	FALSE	FALSE
Anogam_AGAP000901	-0.821566	0.385904285811511	-2.1289380267554	0.0332593881003751	0.0903877978865971	Fem.Oenocytes vs Female total carcass cells	Female Oenocytes	2345.38	Female total carcass cells	4431.55	alanine transaminase	FALSE	FALSE	FALSE
Anogam_AGAP006001	-1.54975	0.798276515331393	-1.94137076819162	0.0522133213207113	0.127080567020342	Fem.Oenocytes vs Female total carcass cells	Female Oenocytes	2341.2	Female total carcass cells	7299.3	CPR26 cuticular protein RR-1 family 26	FALSE	FALSE	FALSE
Anogam_AGAP003119	-0.274687	0.291305160054586	-0.942951972519927	0.345705469334997	0.498718121771714	Fem.Oenocytes vs Female total carcass cells	Female Oenocytes	2339.55	Female total carcass cells	3027.59	translation initiation factor 1A	FALSE	FALSE	FALSE
Anogam_AGAP011423	1.54806	0.437929979776018	3.53494578329523	0.000407858833121197	0.00272047691036251	Fem.Oenocytes vs Female total carcass cells	Female Oenocytes	2335.35	Female total carcass cells	855.432	20S proteasome subunit beta 2	FALSE	FALSE	FALSE
Anogam_AGAP007635	-1.11687	0.258918187017281	-4.31358561844816	1.60627892043631e-05	0.000182176122283069	Fem.Oenocytes vs Female total carcass cells	Female Oenocytes	2306.49	Female total carcass cells	5343.15	60S ribosomal protein L7	FALSE	TRUE	TRUE
Anogam_AGAP001021	2.22324	0.261377174614172	8.50588155885125	1.80220877336798e-17	8.26749142874957e-15	Fem.Oenocytes vs Female total carcass cells	Female Oenocytes	2301.72	Female total carcass cells	526.407	dihydropyrimidine dehydrogenase (NADP+)	TRUE	FALSE	TRUE
Anogam_AGAP009105	0.505316	0.282797307227511	1.78684915468635	0.0739618722444178	0.164124458209691	Fem.Oenocytes vs Female total carcass cells	Female Oenocytes	2301.66	Female total carcass cells	1733.61	Serine-threonine-protein phosphatase 2A 65 kDa regulatory subunit A beta isoform isoform c	FALSE	FALSE	FALSE
Anogam_AGAP003935	1.28179	0.392439083062228	3.26622459028298	0.001089917695357	0.00606418589390582	Fem.Oenocytes vs Female total carcass cells	Female Oenocytes	2297.1	Female total carcass cells	1011.4	Prosalpha1 26S proteasome alpha 1 subunit	FALSE	FALSE	FALSE
Anogam_AGAP003457	2.33737	0.500318639436024	4.67176223402436	2.98626526057779e-06	4.27349176870377e-05	Fem.Oenocytes vs Female total carcass cells	Female Oenocytes	2293.57	Female total carcass cells	484.681		TRUE	FALSE	TRUE
Anogam_AGAP009621	2.02326	0.395048976344956	5.12153481065991	3.03058777598728e-07	5.79606992970129e-06	Fem.Oenocytes vs Female total carcass cells	Female Oenocytes	2289.46	Female total carcass cells	602.236	alpha-N-acetylgalactosaminidase	TRUE	FALSE	TRUE
Anogam_AGAP004396	-0.678006	0.364792712203548	-1.85860511101341	0.0630831321220505	0.146630306195552	Fem.Oenocytes vs Female total carcass cells	Female Oenocytes	2287.34	Female total carcass cells	3916.71	acetyl-CoA hydrolase-transferase (Precursor)	FALSE	FALSE	FALSE
Anogam_AGAP001423	-1.14786	0.434790930175355	-2.64001639098602	0.00829020175719268	0.0306339271865639	Fem.Oenocytes vs Female total carcass cells	Female Oenocytes	2286.18	Female total carcass cells	5401.13	Bifunctional purine biosynthesis protein	FALSE	FALSE	FALSE
Anogam_AGAP009486	0.598056	0.296132680477546	2.01955362083329	0.043429710055084	0.111035370857243	Fem.Oenocytes vs Female total carcass cells	Female Oenocytes	2285.68	Female total carcass cells	1615.16	V-type H+-transporting ATPase 54 kD subunit	FALSE	FALSE	FALSE
Anogam_AGAP000693	0.961776	1.51182506806856	0.636169135675705	NA	NA	Fem.Oenocytes vs Female total carcass cells	Female Oenocytes	2277.9	Female total carcass cells	1247.63	CEC1 cecropin anti-microbial peptide	FALSE	FALSE	FALSE
Anogam_AGAP012135	0.999899	0.394283407904663	2.53599007419036	0.0112129912242237	0.0390508258019935	Fem.Oenocytes vs Female total carcass cells	Female Oenocytes	2276.7	Female total carcass cells	1219.61	26S proteasome regulatory subunit N8	FALSE	FALSE	FALSE
Anogam_AGAP003206	1.81012	0.279342977937039	6.47991042200519	9.17770896789662e-11	4.96858826240837e-09	Fem.Oenocytes vs Female total carcass cells	Female Oenocytes	2273.75	Female total carcass cells	693.012		TRUE	FALSE	TRUE
Anogam_AGAP004725	-0.509675	0.243511095504891	-2.09302767345159	0.0363466842824642	0.0969244914199046	Fem.Oenocytes vs Female total carcass cells	Female Oenocytes	2267.71	Female total carcass cells	3452.54	eIF3c Eukaryotic translation initiation factor 3 subunit C	FALSE	FALSE	FALSE
Anogam_AGAP010386	0.174045	0.304205490113012	0.572128076025081	0.567235209589395	0.696999296452557	Fem.Oenocytes vs Female total carcass cells	Female Oenocytes	2266.85	Female total carcass cells	2146.62	Translocating chain-associated membrane protein 2	FALSE	FALSE	FALSE
Anogam_AGAP011832	-0.25535	0.322097495900152	-0.792771404874918	0.427911019510586	0.577471056664774	Fem.Oenocytes vs Female total carcass cells	Female Oenocytes	2266.45	Female total carcass cells	2893.48	Death-associated protein 1	FALSE	FALSE	FALSE
Anogam_AGAP008299	2.21597	0.706425920281209	3.13687718331916	0.00170757640243181	0.00870983138069905	Fem.Oenocytes vs Female total carcass cells	Female Oenocytes	2264.63	Female total carcass cells	522.344		FALSE	FALSE	FALSE
Anogam_AGAP009510	0.298761	0.440659400416793	0.677986861719838	0.497780023530676	0.638690981800523	Fem.Oenocytes vs Female total carcass cells	Female Oenocytes	2264.51	Female total carcass cells	1971.54	Malate dehydrogenase (Fragment)	FALSE	FALSE	FALSE
Anogam_AGAP013092	-0.829995	0.327382081904835	-2.53525002856877	0.0112367092676353	0.0390984015583111	Fem.Oenocytes vs Female total carcass cells	Female Oenocytes	2262.81	Female total carcass cells	4304.91	cytochrome c oxidase subunit VIb polypeptide 1	FALSE	FALSE	FALSE
Anogam_AGAP009192	1.337	0.345308469044744	3.87191130610706	0.000107985248724146	0.00089465997161576	Fem.Oenocytes vs Female total carcass cells	Female Oenocytes	2258.15	Female total carcass cells	957.236	GSTE5 glutathione S-transferase epsilon class 5	TRUE	FALSE	TRUE
Anogam_AGAP012188	-0.61735	0.293837472013451	-2.1009908473178	0.0356417697033043	0.0955177023583577	Fem.Oenocytes vs Female total carcass cells	Female Oenocytes	2258.01	Female total carcass cells	3704.93	ubiquinol-cytochrome c reductase subunit 7	FALSE	FALSE	FALSE
Anogam_AGAP011492	2.25537	0.427792783708697	5.2721191809236	1.34857453934923e-07	2.85685604277875e-06	Fem.Oenocytes vs Female total carcass cells	Female Oenocytes	2254.12	Female total carcass cells	505.826	Uncharacterized MFS-type transporter C19orf28	TRUE	FALSE	TRUE
Anogam_AGAP012851	3.58817	0.642225201732864	5.58708387317534	2.30914217229493e-08	6.23407459285534e-07	Fem.Oenocytes vs Female total carcass cells	Female Oenocytes	2254.02	Female total carcass cells	200.074	Aldo-keto reductase family 12C member C3	TRUE	FALSE	TRUE
Anogam_AGAP003721	0.33251	0.339415584622461	0.979654752614291	0.327256568148294	0.480138974088521	Fem.Oenocytes vs Female total carcass cells	Female Oenocytes	2250.44	Female total carcass cells	1908.53	ANXB10B annexin B10B	FALSE	FALSE	FALSE
Anogam_AGAP005576	-0.594984	0.264775273211059	-2.24713010196458	0.0246317136457361	0.0720827708017347	Fem.Oenocytes vs Female total carcass cells	Female Oenocytes	2242.09	Female total carcass cells	3620.63	aspartyl-tRNA synthetase	FALSE	FALSE	FALSE
Anogam_AGAP013219	3.24848	0.727117979509528	4.46761419008402	7.90967919500617e-06	9.86973628332965e-05	Fem.Oenocytes vs Female total carcass cells	Female Oenocytes	2241.17	Female total carcass cells	252.984	elongation of very long chain fatty acids protein 7	TRUE	FALSE	TRUE
Anogam_AGAP009982	-0.325104	0.628297325210951	-0.517436852257673	0.6048512397998	0.727584985378739	Fem.Oenocytes vs Female total carcass cells	Female Oenocytes	2239.8	Female total carcass cells	3011.52		FALSE	FALSE	FALSE
Anogam_AGAP012307	1.74311	0.534183747815806	3.26312741385638	0.00110189967654476	0.00611942054188117	Fem.Oenocytes vs Female total carcass cells	Female Oenocytes	2239.52	Female total carcass cells	715.004	Spondin-1	FALSE	FALSE	FALSE
Anogam_AGAP004317	0.849974	0.41546634630183	2.0458311020874	0.0407729908588615	0.105697806553806	Fem.Oenocytes vs Female total carcass cells	Female Oenocytes	2238.52	Female total carcass cells	1328.26	CLIPC2 CLIP-domain serine protease	FALSE	FALSE	FALSE
Anogam_AGAP004625	1.67017	0.307920786930038	5.42402401002849	5.82720494292211e-08	1.39962349708871e-06	Fem.Oenocytes vs Female total carcass cells	Female Oenocytes	2236.42	Female total carcass cells	751.288	cortactin	TRUE	FALSE	TRUE
Anogam_AGAP004176	0.980085	0.325053774471361	3.01514865546975	0.00256853332306049	0.0120887537161227	Fem.Oenocytes vs Female total carcass cells	Female Oenocytes	2236.07	Female total carcass cells	1212.93	serine-threonine-protein kinase-endoribonuclease IRE1	FALSE	FALSE	FALSE
Anogam_AGAP001264	1.78028	0.38699294706321	4.6002973127185	4.2188835180602e-06	5.76336664309638e-05	Fem.Oenocytes vs Female total carcass cells	Female Oenocytes	2235.42	Female total carcass cells	695.456	Plasma glutamate carboxypeptidase	TRUE	FALSE	TRUE
Anogam_AGAP010321	0.0148864	0.299328370322339	0.049732534781454	0.96033552952303	0.977240491106877	Fem.Oenocytes vs Female total carcass cells	Female Oenocytes	2235.22	Female total carcass cells	2367.66	DNA-directed RNA polymerase II subunit RPB3	FALSE	FALSE	FALSE
Anogam_AGAP000808	2.10226	0.684957162012169	3.069185972179	0.00214642929850066	0.0104234763086183	Fem.Oenocytes vs Female total carcass cells	Female Oenocytes	2220.09	Female total carcass cells	552.146	DNA damage-regulated autophagy modulator protein 2	FALSE	FALSE	FALSE
Anogam_AGAP003221	1.46838	0.70204868345048	2.09155734592324	0.0364781315076815	0.0972127432907085	Fem.Oenocytes vs Female total carcass cells	Female Oenocytes	2216.81	Female total carcass cells	856.171	ABCC3 ATP-binding cassette transporter (ABC transporter) family C member 3	FALSE	FALSE	FALSE
Anogam_AGAP008905	1.88175	0.348246836269059	5.4034880498989	6.53573118397367e-08	1.53732417182571e-06	Fem.Oenocytes vs Female total carcass cells	Female Oenocytes	2216.45	Female total carcass cells	644.427		TRUE	FALSE	TRUE
Anogam_AGAP004743	1.08829	0.266858659260526	4.07815649700142	4.5394208178853e-05	0.00042769202402028	Fem.Oenocytes vs Female total carcass cells	Female Oenocytes	2215.43	Female total carcass cells	1114.15	Transmembrane emp24 domain-containing protein	TRUE	FALSE	TRUE
Anogam_AGAP006254	0.602754	0.227675618863822	2.64742506214867	0.00811073336996299	0.0301668570852277	Fem.Oenocytes vs Female total carcass cells	Female Oenocytes	2214.81	Female total carcass cells	1559.31	polypeptide N-acetylglucosaminyltransferase	FALSE	FALSE	FALSE
Anogam_AGAP002396	0.66237	0.282183132178874	2.34730679113256	0.0189096775353466	0.0588275526122428	Fem.Oenocytes vs Female total carcass cells	Female Oenocytes	2213.8	Female total carcass cells	1495.28	dolichyl-diphosphooligosaccharide--protein glycosyltransferase	FALSE	FALSE	FALSE
Anogam_AGAP000167	-0.805585	0.393970112288303	-2.04478752160691	0.0408758105158223	0.105878289285871	Fem.Oenocytes vs Female total carcass cells	Female Oenocytes	2210.17	Female total carcass cells	4132.71	Lipid storage droplets surface-binding protein 2	FALSE	FALSE	FALSE
Anogam_AGAP000064	0.900283	0.515792234837145	1.74543634982935	0.0809089429236324	0.175468483254474	Fem.Oenocytes vs Female total carcass cells	Female Oenocytes	2210.02	Female total carcass cells	1263.35	plexA plexin A	FALSE	FALSE	FALSE
Anogam_AGAP028143	0.392318	0.228835987975671	1.71440572009703	0.0864542387310015	0.18379384390102	Fem.Oenocytes vs Female total carcass cells	Female Oenocytes	2208.77	Female total carcass cells	1798.4		FALSE	FALSE	FALSE
Anogam_AGAP009074	2.38886	0.510732150070298	4.67732200262535	2.90645671854928e-06	4.17462981411399e-05	Fem.Oenocytes vs Female total carcass cells	Female Oenocytes	2202.61	Female total carcass cells	448.764	atrophin-1 interacting protein 5 (WW domain containing E3 ubiquitin protein li	TRUE	FALSE	TRUE
Anogam_AGAP006914	3.98411	0.637502883802217	6.2495617842416	4.11605896127807e-10	1.83110936051292e-08	Fem.Oenocytes vs Female total carcass cells	Female Oenocytes	2200.44	Female total carcass cells	148.728	fibrinogen-related protein 1	TRUE	FALSE	TRUE
Anogam_AGAP012140	-0.828503	0.222528495621029	-3.72313245577236	0.000196766225623301	0.00147603520570206	Fem.Oenocytes vs Female total carcass cells	Female Oenocytes	2198.46	Female total carcass cells	4172.57	eIF3b Eukaryotic translation initiation factor 3 subunit B	FALSE	FALSE	FALSE
Anogam_AGAP000022	0.427588	0.329876456476282	1.2962055643647	0.194904673021286	0.332966191127979	Fem.Oenocytes vs Female total carcass cells	Female Oenocytes	2194.47	Female total carcass cells	1743.41	amino acid transporter protein	FALSE	FALSE	FALSE
Anogam_AGAP010156	-2.01559	0.408283382386104	-4.93673308832785	7.94420770247827e-07	1.35249805676801e-05	Fem.Oenocytes vs Female total carcass cells	Female Oenocytes	2192.4	Female total carcass cells	9479.71	ATP citrate lyase	FALSE	TRUE	TRUE
Anogam_AGAP012199	-0.828027	0.43292549897279	-1.9126311982117	0.0557952827806204	0.133660842133449	Fem.Oenocytes vs Female total carcass cells	Female Oenocytes	2177.54	Female total carcass cells	4138.96	Histone H2B	FALSE	FALSE	FALSE
Anogam_AGAP004366	0.928696	0.312729451489652	2.96964562562919	0.00298143462733774	0.0136248499807592	Fem.Oenocytes vs Female total carcass cells	Female Oenocytes	2175.25	Female total carcass cells	1221.26	1-pyrroline-5-carboxylate dehydrogenase	FALSE	FALSE	FALSE
Anogam_AGAP009443	0.117698	0.448051356613838	0.262688974572312	0.792790315446562	0.86711175923562	Fem.Oenocytes vs Female total carcass cells	Female Oenocytes	2174.96	Female total carcass cells	2142.96	excitatory amino acid transporter 3	FALSE	FALSE	FALSE
Anogam_AGAP004686	-0.550233	0.249250537049696	-2.20755165723133	0.0272755422421824	0.0779344731142168	Fem.Oenocytes vs Female total carcass cells	Female Oenocytes	2169.9	Female total carcass cells	3397.31		FALSE	FALSE	FALSE
Anogam_AGAP000832	0.369486	0.24766070720575	1.49190520356014	0.135723998356485	0.257379622545702	Fem.Oenocytes vs Female total carcass cells	Female Oenocytes	2162.81	Female total carcass cells	1790.19	Derlin-2-3	FALSE	FALSE	FALSE
Anogam_AGAP007103	0.732586	0.373774401294877	1.95996736289055	0.0499996051054465	0.122920701450968	Fem.Oenocytes vs Female total carcass cells	Female Oenocytes	2158.64	Female total carcass cells	1387.53	calsyntenin-1	FALSE	FALSE	FALSE
Anogam_AGAP004890	-1.41862	0.303756215863672	-4.67026626920644	3.00809570304224e-06	4.29275753273712e-05	Fem.Oenocytes vs Female total carcass cells	Female Oenocytes	2153.21	Female total carcass cells	6150.12	ribose-phosphate pyrophosphokinase	FALSE	TRUE	TRUE
Anogam_AGAP008557	1.83376	0.540516414003944	3.39260735505602	0.000692307973977415	0.00420646982763474	Fem.Oenocytes vs Female total carcass cells	Female Oenocytes	2153.03	Female total carcass cells	647.186	AMP-binding domain protein	FALSE	FALSE	FALSE
Anogam_AGAP003588	0.944024	0.330867272371261	2.85317913473493	0.00432842145146622	0.0183958903910706	Fem.Oenocytes vs Female total carcass cells	Female Oenocytes	2151.37	Female total carcass cells	1196.9	VATH V-type H+-transporting ATPase subunit H	FALSE	FALSE	FALSE
Anogam_AGAP000815	1.66232	0.399948644708642	4.15633143447833	3.23398578606245e-05	0.000324413162382264	Fem.Oenocytes vs Female total carcass cells	Female Oenocytes	2142.15	Female total carcass cells	723.417	INTB integrin beta subunit	TRUE	FALSE	TRUE
Anogam_AGAP012167	-0.295633	0.527019397686318	-0.560951985623409	0.574830269475764	0.702707684262368	Fem.Oenocytes vs Female total carcass cells	Female Oenocytes	2141.82	Female total carcass cells	2816.39	Pgi phosphoglucose isomerase (glucose-6-phosphate isomerase)	FALSE	FALSE	FALSE
Anogam_AGAP001313	1.07057	0.345328292507017	3.10013875842173	0.00193430002408592	0.0096076494400229	Fem.Oenocytes vs Female total carcass cells	Female Oenocytes	2141.43	Female total carcass cells	1089.46	Muscular protein 20	FALSE	FALSE	FALSE
Anogam_AGAP007592	2.02588	0.457683844105737	4.42636853958718	9.58327403342436e-06	0.000116872538629318	Fem.Oenocytes vs Female total carcass cells	Female Oenocytes	2130.71	Female total carcass cells	559.027	kinesin family member	TRUE	FALSE	TRUE
Anogam_AGAP002481	0.923561	0.289915195058917	3.18562424580037	0.00144442066474184	0.00762013351363053	Fem.Oenocytes vs Female total carcass cells	Female Oenocytes	2129.8	Female total carcass cells	1201.91	26S proteasome regulatory subunit N1	FALSE	FALSE	FALSE
Anogam_AGAP007473	-0.902775	0.317728538458047	-2.84134013362803	0.00449243695845877	0.0189709512830995	Fem.Oenocytes vs Female total carcass cells	Female Oenocytes	2128.51	Female total carcass cells	4257.49	FK506-binding nuclear protein	FALSE	FALSE	FALSE
Anogam_AGAP005558	-0.525859	0.314183018392595	-1.67373437212971	0.0941828153712515	0.19567077500074	Fem.Oenocytes vs Female total carcass cells	Female Oenocytes	2120.38	Female total carcass cells	3263.5	peptidase (mitochondrial processing) beta	FALSE	FALSE	FALSE
Anogam_AGAP009538	1.56186	0.288156887747126	5.42016214083669	5.95450051129139e-08	1.41972474471655e-06	Fem.Oenocytes vs Female total carcass cells	Female Oenocytes	2117.8	Female total carcass cells	767.374	alpha-Adaptin AP-2 complex subunit alpha	TRUE	FALSE	TRUE
Anogam_AGAP000851	-0.72361	0.298255060781209	-2.42614547670173	0.0152601518211211	0.0497584045359182	Fem.Oenocytes vs Female total carcass cells	Female Oenocytes	2116.11	Female total carcass cells	3738.5	cytochrome c oxidase subunit 6a2C mitochrondrial	FALSE	FALSE	FALSE
Anogam_AGAP007781	-1.25551	0.352547252616171	-3.56126332689585	0.000369074702991621	0.00251088587833129	Fem.Oenocytes vs Female total carcass cells	Female Oenocytes	2113.13	Female total carcass cells	5391.25	eukaryotic translation initiation factor 4E-binding protein 1	FALSE	FALSE	FALSE
Anogam_AGAP011122	0.0520008	0.357525269600915	0.145446362701674	0.884358461671566	0.929507527460037	Fem.Oenocytes vs Female total carcass cells	Female Oenocytes	2108.47	Female total carcass cells	2177.54	NAD+ kinase	FALSE	FALSE	FALSE
Anogam_AGAP004671	-0.601851	0.28417304930057	-2.11790490274544	0.0341831223178133	0.0924561743473079	Fem.Oenocytes vs Female total carcass cells	Female Oenocytes	2102.53	Female total carcass cells	3409.74	nuclear pore complex protein Nup160	FALSE	FALSE	FALSE
Anogam_AGAP003688	1.79091	0.577928857449256	3.09884121397188	0.00194279112816395	0.00964046499678639	Fem.Oenocytes vs Female total carcass cells	Female Oenocytes	2102.06	Female total carcass cells	649.512	threonine aldolase	FALSE	FALSE	FALSE
Anogam_AGAP002461	1.71353	0.406831511128422	4.21189146347284	2.53241224094629e-05	0.00026440451070778	Fem.Oenocytes vs Female total carcass cells	Female Oenocytes	2100.4	Female total carcass cells	684.305		TRUE	FALSE	TRUE
Anogam_AGAP006879	-0.720589	0.362752269451705	-1.98645049679787	0.0469833243486961	0.117567467531391	Fem.Oenocytes vs Female total carcass cells	Female Oenocytes	2098.22	Female total carcass cells	3699.47	F-type H+-transporting ATPase subunit e	FALSE	FALSE	FALSE
Anogam_AGAP008617	0.501945	0.345615245220697	1.45232381432016	0.146411588846076	0.271637965017779	Fem.Oenocytes vs Female total carcass cells	Female Oenocytes	2094.53	Female total carcass cells	1583.76	26S proteasome regulatory subunit N11	FALSE	FALSE	FALSE
Anogam_AGAP000669	-1.05938	0.309357873378957	-3.4244417129276	0.000616063982349123	0.00380880161171978	Fem.Oenocytes vs Female total carcass cells	Female Oenocytes	2093.98	Female total carcass cells	4666.19		FALSE	FALSE	FALSE
Anogam_AGAP003519	0.516111	0.24542698240525	2.10290979282997	0.03547365563962	0.0952417854905777	Fem.Oenocytes vs Female total carcass cells	Female Oenocytes	2092.95	Female total carcass cells	1564.82	ankyrin repeat domain-containing protein 17	FALSE	FALSE	FALSE
Anogam_AGAP010509	-0.969024	0.408035841148214	-2.37485097876475	0.0175560364814376	0.0555624389972376	Fem.Oenocytes vs Female total carcass cells	Female Oenocytes	2089.19	Female total carcass cells	4378.01	organic cation transporter 3	FALSE	FALSE	FALSE
Anogam_AGAP008762	-0.838745	0.339002643256902	-2.47415571949627	0.0133551471527564	0.0447738747270654	Fem.Oenocytes vs Female total carcass cells	Female Oenocytes	2088.99	Female total carcass cells	3987.24		FALSE	FALSE	FALSE
Anogam_AGAP009311	0.971952	0.442271800654965	2.1976354176811	0.0279750971817929	0.0793791443050763	Fem.Oenocytes vs Female total carcass cells	Female Oenocytes	2079.45	Female total carcass cells	1134.18	Tocopherol (alpha) transfer protein-like	FALSE	FALSE	FALSE
Anogam_AGAP001973	0.961347	0.457361925164238	2.10193966116926	0.0355585617201036	0.0953946522076823	Fem.Oenocytes vs Female total carcass cells	Female Oenocytes	2073.86	Female total carcass cells	1140.86	Prosalpha7 26S proteasome alpha 7 subunit	FALSE	FALSE	FALSE
Anogam_AGAP009647	1.39685	0.456586778723083	3.05932681333195	0.00221835007164833	0.0107370661935221	Fem.Oenocytes vs Female total carcass cells	Female Oenocytes	2064.56	Female total carcass cells	839.204	proteasome maturation protein	FALSE	FALSE	FALSE
Anogam_AGAP008163	-0.535601	0.244697554407832	-2.18882878186826	0.028609286947394	0.0807754481362405	Fem.Oenocytes vs Female total carcass cells	Female Oenocytes	2063.47	Female total carcass cells	3196.35	U4-U6 small nuclear ribonucleoprotein SNU13	FALSE	FALSE	FALSE
Anogam_AGAP009844	-0.0862174	0.802906690476574	-0.107381651871984	0.914486210020163	0.94966232628908	Fem.Oenocytes vs Female total carcass cells	Female Oenocytes	2057.84	Female total carcass cells	2331.1	CLIPB15 CLIP-domain serine protease	FALSE	FALSE	FALSE
Anogam_AGAP005183	2.70882	0.292926909043791	9.24742293826085	2.29970270338044e-20	2.13914164190806e-17	Fem.Oenocytes vs Female total carcass cells	Female Oenocytes	2055	Female total carcass cells	336.419		TRUE	FALSE	TRUE
Anogam_AGAP002509	1.65267	0.416195229143322	3.9708949452542	7.16031501283432e-05	0.000632134108812086	Fem.Oenocytes vs Female total carcass cells	Female Oenocytes	2054.07	Female total carcass cells	697.747		TRUE	FALSE	TRUE
Anogam_AGAP007243	0.938916	0.421124884959552	2.22954366243516	0.0257777535619306	0.0747825274867236	Fem.Oenocytes vs Female total carcass cells	Female Oenocytes	2046.4	Female total carcass cells	1143.04	26S protease regulatory subunit 8	FALSE	FALSE	FALSE
Anogam_AGAP011110	1.08321	0.310411859095301	3.48957808850159	0.00048378369041299	0.00312791821977583	Fem.Oenocytes vs Female total carcass cells	Female Oenocytes	2043.85	Female total carcass cells	1032.11	transcription initiation factor TFIIH subunit 1	FALSE	FALSE	FALSE
Anogam_AGAP003487	2.97072	0.671377105762094	4.42481979082905	9.65228231756444e-06	0.000117434188672199	Fem.Oenocytes vs Female total carcass cells	Female Oenocytes	2043.81	Female total carcass cells	279.58	Mesenchymal stem cell protein DSCD75	TRUE	FALSE	TRUE
Anogam_AGAP009685	-1.02068	0.422693307141182	-2.41471532749214	0.0157475119042444	0.0511000440037774	Fem.Oenocytes vs Female total carcass cells	Female Oenocytes	2038.14	Female total carcass cells	4423.21	aspartate aminotransferase2C mitochondrial	FALSE	FALSE	FALSE
Anogam_AGAP004092	0.091656	0.385822115802526	0.237560378672022	0.812222084037803	0.88129972045332	Fem.Oenocytes vs Female total carcass cells	Female Oenocytes	2037.9	Female total carcass cells	2046.99	APG2 autophagy related gene	FALSE	FALSE	FALSE
Anogam_AGAP001760	0.387134	0.457233754438021	0.846686402923969	0.397169939531525	0.548723038250954	Fem.Oenocytes vs Female total carcass cells	Female Oenocytes	2037.1	Female total carcass cells	1668.26	protein phosphatase 32C regulatory subunit	FALSE	FALSE	FALSE
Anogam_AGAP008769	1.93234	0.335384808338083	5.76156084693996	8.33396078360141e-09	2.59188713488783e-07	Fem.Oenocytes vs Female total carcass cells	Female Oenocytes	2036.64	Female total carcass cells	571.291	very long chain acyl-CoA dehydrogenase	TRUE	FALSE	TRUE
Anogam_AGAP001325	-0.224442	0.272876075465952	-0.822503953925806	0.41079013727657	0.562376864411809	Fem.Oenocytes vs Female total carcass cells	Female Oenocytes	2035.45	Female total carcass cells	2542.77	peroxiredoxin 52C atypical 2-Cys peroxiredoxin	FALSE	FALSE	FALSE
Anogam_AGAP012048	-0.887856	0.439458261341517	-2.02034121431175	0.0433480065413617	0.110911928714982	Fem.Oenocytes vs Female total carcass cells	Female Oenocytes	2034.77	Female total carcass cells	4030.47	Citrate synthase	FALSE	FALSE	FALSE
Anogam_AGAP005209	1.06536	0.536309788192191	1.98646165542685	0.0469820864468657	0.117567467531391	Fem.Oenocytes vs Female total carcass cells	Female Oenocytes	2030.84	Female total carcass cells	1036.98	Uridine kinase	FALSE	FALSE	FALSE
Anogam_AGAP009132	2.81655	0.515345683754845	5.46536858837254	4.619459086208e-08	1.14169819734493e-06	Fem.Oenocytes vs Female total carcass cells	Female Oenocytes	2026.75	Female total carcass cells	308.47	CKLF-like MARVEL transmembrane domain-containing protein 4	TRUE	FALSE	TRUE
Anogam_AGAP011791	-1.27997	0.908173948233215	-1.40939390542594	0.158718725181566	0.287689990444249	Fem.Oenocytes vs Female total carcass cells	Female Oenocytes	2025.72	Female total carcass cells	5249.94	CLIPA1 CLIP-domain serine protease	FALSE	FALSE	FALSE
Anogam_AGAP012281	-0.24363	0.241074054638432	-1.01060199385807	0.312206961143731	0.464654782025114	Fem.Oenocytes vs Female total carcass cells	Female Oenocytes	2024.99	Female total carcass cells	2563.77	eIF3m Eukaryotic translation initiation factor 3 subunit M	FALSE	FALSE	FALSE
Anogam_AGAP001759	0.412543	0.304997529419925	1.35260998960129	0.176180259385917	0.310431619431152	Fem.Oenocytes vs Female total carcass cells	Female Oenocytes	2017.8	Female total carcass cells	1620.56	protein transport protein SEC23	FALSE	FALSE	FALSE
Anogam_AGAP006570	2.42681	0.564590416339789	4.29835192249341	1.72072800024469e-05	0.000192000969449331	Fem.Oenocytes vs Female total carcass cells	Female Oenocytes	2015.64	Female total carcass cells	400.641	myo-inositol-1(or 4)-monophosphatase	TRUE	FALSE	TRUE
Anogam_AGAP007743	0.332825	0.571686412653255	0.582180190956761	0.560445314803343	0.691862473962416	Fem.Oenocytes vs Female total carcass cells	Female Oenocytes	2012.74	Female total carcass cells	1712.52	solute carrier family 16 (monocarboxylic acid transporters)2C member 10	FALSE	FALSE	FALSE
Anogam_AGAP009460	3.43166	0.692918326939892	4.95247733477217	7.32745932818287e-07	1.26990068499048e-05	Fem.Oenocytes vs Female total carcass cells	Female Oenocytes	2012.14	Female total carcass cells	199.078	c-Jun N-terminal kinase	TRUE	FALSE	TRUE
Anogam_AGAP002015	1.4571	0.259705740539206	5.61059802304371	2.01628623878925e-08	5.53100289418004e-07	Fem.Oenocytes vs Female total carcass cells	Female Oenocytes	2009.4	Female total carcass cells	782.037	dynein heavy chain 12C cytosolic	TRUE	FALSE	TRUE
Anogam_AGAP002415	3.49819	0.452391729337976	7.73266512703229	1.05318075557897e-14	2.01716100600715e-12	Fem.Oenocytes vs Female total carcass cells	Female Oenocytes	2002.85	Female total carcass cells	189.23		TRUE	FALSE	TRUE
Anogam_AGAP005316	1.34191	0.294498889720345	4.55657347504397	5.19948562502251e-06	6.92723136917062e-05	Fem.Oenocytes vs Female total carcass cells	Female Oenocytes	2001.76	Female total carcass cells	845.48	charged multivesicular body protein 4	TRUE	FALSE	TRUE
Anogam_AGAP010451	0.879046	0.263324780791265	3.33825696355056	0.000843057452172794	0.00491239399238726	Fem.Oenocytes vs Female total carcass cells	Female Oenocytes	2000.76	Female total carcass cells	1163.73	Lon-like ATP-dependent protease	FALSE	FALSE	FALSE
Anogam_AGAP009334	0.644343	0.324516422442805	1.9855491032916	0.0470834126741133	0.117760322288322	Fem.Oenocytes vs Female total carcass cells	Female Oenocytes	1995.6	Female total carcass cells	1367.38	V-type H+-transporting ATPase 21kDa proteolipid subunit	FALSE	FALSE	FALSE
Anogam_AGAP002171	-0.911517	0.265273296656116	-3.43614364713449	0.000590058026918125	0.00368710228025597	Fem.Oenocytes vs Female total carcass cells	Female Oenocytes	1994.51	Female total carcass cells	4009.71	nucleolar protein 58	FALSE	FALSE	FALSE
Anogam_AGAP001749	1.0076	0.285606055166557	3.52793176922397	0.000418820097991813	0.00277909678511817	Fem.Oenocytes vs Female total carcass cells	Female Oenocytes	1993.67	Female total carcass cells	1059.86	Stromal cell-derived factor 2	FALSE	FALSE	FALSE
Anogam_AGAP007638	0.372309	0.295342940646574	1.26059911054486	0.207453319277211	0.348663331610451	Fem.Oenocytes vs Female total carcass cells	Female Oenocytes	1992.69	Female total carcass cells	1646.97	oligosaccharyltransferase complex subunit delta (ribophorin II)	FALSE	FALSE	FALSE
Anogam_AGAP005981	0.336157	0.247813388364161	1.35649182044182	0.174942736136361	0.308823587267062	Fem.Oenocytes vs Female total carcass cells	Female Oenocytes	1992.56	Female total carcass cells	1688.08	DnaJ homolog subfamily A member 1	FALSE	FALSE	FALSE
Anogam_AGAP007717	1.64025	0.539355768046428	3.04112753646218	0.00235693973038449	0.0113062387816662	Fem.Oenocytes vs Female total carcass cells	Female Oenocytes	1987.21	Female total carcass cells	683.646		FALSE	FALSE	FALSE
Anogam_AGAP005777	0.957771	0.364393486254893	2.62839657205433	0.00857884388629667	0.0315070820691269	Fem.Oenocytes vs Female total carcass cells	Female Oenocytes	1978.3	Female total carcass cells	1090.81	Chloride channel protein	FALSE	FALSE	FALSE
Anogam_AGAP000126	2.38339	0.418693360997663	5.69245127370588	1.25228342666494e-08	3.67145100906465e-07	Fem.Oenocytes vs Female total carcass cells	Female Oenocytes	1978.04	Female total carcass cells	404.767		TRUE	FALSE	TRUE
Anogam_AGAP001084	3.07432	0.928443794234579	3.31126657150971	0.000928746893858639	0.00535376801011921	Fem.Oenocytes vs Female total carcass cells	Female Oenocytes	1977.49	Female total carcass cells	252.77	Fatty acyl-CoA reductase	FALSE	FALSE	FALSE
Anogam_AGAP012577	-2.08988	0.502514742044097	-4.15883503160318	3.19874804338305e-05	0.000321193228458247	Fem.Oenocytes vs Female total carcass cells	Female Oenocytes	1971.79	Female total carcass cells	8955.87		FALSE	TRUE	TRUE
Anogam_AGAP013189	-1.10966	0.395466312691494	-2.80595285064606	0.00501680324988847	0.0207569473727694	Fem.Oenocytes vs Female total carcass cells	Female Oenocytes	1969.59	Female total carcass cells	4544.41		FALSE	FALSE	FALSE
Anogam_AGAP002807	1.04955	0.340307348683001	3.08412951123563	0.00204148703774027	0.0100280822708394	Fem.Oenocytes vs Female total carcass cells	Female Oenocytes	1965.04	Female total carcass cells	1013.96		FALSE	FALSE	FALSE
Anogam_AGAP004484	0.0523435	0.346909703707221	0.150885104925019	0.880066350507323	0.92745473054477	Fem.Oenocytes vs Female total carcass cells	Female Oenocytes	1964.19	Female total carcass cells	2027.04	CDGSH iron sulfur domain-containing protein 2 homolog	FALSE	FALSE	FALSE
Anogam_AGAP001068	0.724683	0.261590771252038	2.77029364978293	0.00560057748986486	0.0226144865336611	Fem.Oenocytes vs Female total carcass cells	Female Oenocytes	1963.97	Female total carcass cells	1271.82	ubiquitin-conjugating enzyme E2 H	FALSE	FALSE	FALSE
Anogam_AGAP010253	1.25767	0.467864019509973	2.68810111589417	0.00718596327449891	0.0274866453176347	Fem.Oenocytes vs Female total carcass cells	Female Oenocytes	1958.77	Female total carcass cells	876.942	Prosalpha6 26S proteasome alpha 6 subunit	FALSE	FALSE	FALSE
Anogam_AGAP001256	2.32652	0.516497021027794	4.50442240183336	6.65537108513227e-06	8.54191005165252e-05	Fem.Oenocytes vs Female total carcass cells	Female Oenocytes	1958.46	Female total carcass cells	416.814	3-phosphoadenosine 5-phosphosulfate synthase	TRUE	FALSE	TRUE
Anogam_AGAP010039	-0.474584	0.32571928699312	-1.4570344848143	0.145106861330642	0.269706340624001	Fem.Oenocytes vs Female total carcass cells	Female Oenocytes	1953.53	Female total carcass cells	2904.58	NADH_dehyd NADH dehydrogenase [ubiquinone] flavoprotein 12C mitochondrial (Fragment)	FALSE	FALSE	FALSE
Anogam_AGAP004640	0.935561	0.267975746187797	3.49121435339059	0.000480830315892231	0.00311580480823895	Fem.Oenocytes vs Female total carcass cells	Female Oenocytes	1952.61	Female total carcass cells	1090.7		FALSE	FALSE	FALSE
Anogam_AGAP000536	1.95364	0.407757234454142	4.79118112094227	1.65802368002888e-06	2.5358592367796e-05	Fem.Oenocytes vs Female total carcass cells	Female Oenocytes	1950.4	Female total carcass cells	539.072	PGRPS1 peptidoglycan recognition protein (short)	TRUE	FALSE	TRUE
Anogam_AGAP001341	0.150305	0.273741810962558	0.549075972560158	0.582953313626524	0.709248312131581	Fem.Oenocytes vs Female total carcass cells	Female Oenocytes	1948.75	Female total carcass cells	1877.33	bleomycin hydrolase	FALSE	FALSE	FALSE
Anogam_AGAP004486	-0.376015	0.281497528259185	-1.33576822960549	0.181625040291326	0.317293394615136	Fem.Oenocytes vs Female total carcass cells	Female Oenocytes	1947.27	Female total carcass cells	2703.9	adiponectin receptor	FALSE	FALSE	FALSE
Anogam_AGAP000862	0.651658	0.362280191247929	1.79876881508901	0.072055258236198	0.161116565181988	Fem.Oenocytes vs Female total carcass cells	Female Oenocytes	1942.3	Female total carcass cells	1320.76	alpha 12C3-glucosidase	FALSE	FALSE	FALSE
Anogam_AGAP011174	0.84936	0.348070853135239	2.44019198879951	0.0146794581055157	0.0482028932399349	Fem.Oenocytes vs Female total carcass cells	Female Oenocytes	1940.52	Female total carcass cells	1152.82	26S proteasome regulatory subunit T1	FALSE	FALSE	FALSE
Anogam_AGAP005187	-0.0531704	0.266530782037135	-0.199490640583063	0.841878963953429	0.900680213213246	Fem.Oenocytes vs Female total carcass cells	Female Oenocytes	1933.93	Female total carcass cells	2145.09		FALSE	FALSE	FALSE
Anogam_AGAP006937	0.462911	0.232641431062195	1.98980538230165	0.0466123783107196	0.116896533057667	Fem.Oenocytes vs Female total carcass cells	Female Oenocytes	1933.59	Female total carcass cells	1500.67	ubiquitin-conjugating enzyme E2 variant	FALSE	FALSE	FALSE
Anogam_AGAP009059	2.15553	0.394532792191593	5.46348974821439	4.66864243946598e-08	1.14830647693788e-06	Fem.Oenocytes vs Female total carcass cells	Female Oenocytes	1933.54	Female total carcass cells	463.397	Glia maturation factor beta	TRUE	FALSE	TRUE
Anogam_AGAP003352	2.31591	0.625098165328127	3.70486985825841	0.000211499294179701	0.0015613714127321	Fem.Oenocytes vs Female total carcass cells	Female Oenocytes	1933.15	Female total carcass cells	414.803	Stomatin (EPB72)-like 3	FALSE	FALSE	FALSE
Anogam_AGAP012189	0.168058	0.42278692177409	0.397499623572452	0.690999064074274	0.794059122148245	Fem.Oenocytes vs Female total carcass cells	Female Oenocytes	1926.66	Female total carcass cells	1833.73	abhydrolase domain-containing protein 12	FALSE	FALSE	FALSE
Anogam_AGAP010010	0.361183	0.300541872667735	1.20177337063329	0.229451345411358	0.375159182845799	Fem.Oenocytes vs Female total carcass cells	Female Oenocytes	1926.63	Female total carcass cells	1603.83	oligosaccharyltransferase complex subunit gamma	FALSE	FALSE	FALSE
Anogam_AGAP007104	-0.201568	0.352280531582005	-0.572181027698441	0.567199339352139	0.696999296452557	Fem.Oenocytes vs Female total carcass cells	Female Oenocytes	1924.83	Female total carcass cells	2366.7	farnesyl diphosphate synthase	FALSE	FALSE	FALSE
Anogam_AGAP002063	-0.367149	0.261862213365128	-1.40207077901871	0.160894111923307	0.290808788765108	Fem.Oenocytes vs Female total carcass cells	Female Oenocytes	1924.63	Female total carcass cells	2653.83	nucleolar protein 56	FALSE	FALSE	FALSE
Anogam_AGAP005931	-0.0746141	0.581309760996176	-0.128355086667208	0.897867972725475	0.938580339985535	Fem.Oenocytes vs Female total carcass cells	Female Oenocytes	1923.81	Female total carcass cells	2164.12	Differentially expressed in FDCP 8 homolog	FALSE	FALSE	FALSE
Anogam_AGAP001032	0.657165	0.469718068595651	1.39906297597327	0.161794099020413	0.291971291212851	Fem.Oenocytes vs Female total carcass cells	Female Oenocytes	1922.63	Female total carcass cells	1302.35	Interferon-related developmental regulator 1	FALSE	FALSE	FALSE
Anogam_AGAP003474	-3.74181	0.466920159224172	-8.01380321277368	1.11214606693276e-15	2.64639036205953e-13	Fem.Oenocytes vs Female total carcass cells	Female Oenocytes	1922.51	Female total carcass cells	27438.6		FALSE	TRUE	TRUE
Anogam_AGAP004653	-0.64217	0.347830883095903	-1.84621294942405	0.0648612914431447	0.149271420163351	Fem.Oenocytes vs Female total carcass cells	Female Oenocytes	1922.13	Female total carcass cells	3209.55	electron transfer flavoprotein subunit beta2C mitochondrial	FALSE	FALSE	FALSE
Anogam_AGAP006099	-1.39149	0.293186572644935	-4.74608044015593	2.07396260406237e-06	3.07547613982118e-05	Fem.Oenocytes vs Female total carcass cells	Female Oenocytes	1913.4	Female total carcass cells	5369.73	ubiquinol-cytochrome c reductase core subunit 2	FALSE	TRUE	TRUE
Anogam_AGAP009323	-0.761027	0.294601170138833	-2.58324522472029	0.00978757269567266	0.0349499263514908	Fem.Oenocytes vs Female total carcass cells	Female Oenocytes	1909.93	Female total carcass cells	3461.27	prohibitin 1	FALSE	FALSE	FALSE
Anogam_AGAP002084	1.66028	0.329471789027281	5.0392138162563	4.67448031031955e-07	8.63344450093675e-06	Fem.Oenocytes vs Female total carcass cells	Female Oenocytes	1909.89	Female total carcass cells	647.026	glycerol-3-phosphate O-acyltransferase 3-4	TRUE	FALSE	TRUE
Anogam_AGAP002931	0.919678	0.23915955988587	3.84545911688316	0.000120326926448144	0.000978684508280933	Fem.Oenocytes vs Female total carcass cells	Female Oenocytes	1906.94	Female total carcass cells	1078.47	Arf2 ADP-ribosylation factor 2	FALSE	FALSE	FALSE
Anogam_AGAP005423	1.05331	0.419451594578492	2.51116359288533	0.0120333917341314	0.0411791519142583	Fem.Oenocytes vs Female total carcass cells	Female Oenocytes	1904.83	Female total carcass cells	982.536	Prosalpha4 26S proteasome alpha 4 subunit	FALSE	FALSE	FALSE
Anogam_AGAP012522	0.825641	0.258521169205092	3.1937075095974	0.00140458349368831	0.00745033608471686	Fem.Oenocytes vs Female total carcass cells	Female Oenocytes	1899.87	Female total carcass cells	1145.67		FALSE	FALSE	FALSE
Anogam_AGAP001928	-0.999026	0.262653981879648	-3.80358181373609	0.000142618861806953	0.00112947073839686	Fem.Oenocytes vs Female total carcass cells	Female Oenocytes	1898.26	Female total carcass cells	4055.92	nucleosome assembly protein 1-like 1	FALSE	FALSE	FALSE
Anogam_AGAP011792	-2.94492	0.6606384229102	-4.45768252908416	8.28504817465857e-06	0.000103004389943021	Fem.Oenocytes vs Female total carcass cells	Female Oenocytes	1898.15	Female total carcass cells	15591.4	CLIPA7 CLIP-domain serine protease	FALSE	TRUE	TRUE
Anogam_AGAP005108	-1.09653	0.244378192819093	-4.48703766370516	7.22203113101908e-06	9.1796052835512e-05	Fem.Oenocytes vs Female total carcass cells	Female Oenocytes	1894.63	Female total carcass cells	4329.84	Proliferation-associated 2G4	FALSE	TRUE	TRUE
Anogam_AGAP008491	0.934603	0.316682435221388	2.95122936374241	0.00316511784578208	0.0143171908921496	Fem.Oenocytes vs Female total carcass cells	Female Oenocytes	1894.27	Female total carcass cells	1060.47	oligosaccharyltransferase complex subunit epsilon	FALSE	FALSE	FALSE
Anogam_AGAP006890	1.72464	0.424259090155781	4.06505251110681	4.80216487659508e-05	0.000449549414614098	Fem.Oenocytes vs Female total carcass cells	Female Oenocytes	1893.39	Female total carcass cells	612.596	Arf3 ADP-ribosylation factor 3	TRUE	FALSE	TRUE
Anogam_AGAP008000	1.28845	0.351492114661734	3.66565565492116	0.00024670570051943	0.00178395245774898	Fem.Oenocytes vs Female total carcass cells	Female Oenocytes	1888.14	Female total carcass cells	825.329	sepiapterin reductase	FALSE	FALSE	FALSE
Anogam_AGAP006243	1.85124	0.462464089912746	4.00299211389852	6.25463878224022e-05	0.000564110628771146	Fem.Oenocytes vs Female total carcass cells	Female Oenocytes	1887.48	Female total carcass cells	559.192	phosphatidylinositol-42C5-bisphosphate 4-phosphatase	TRUE	FALSE	TRUE
Anogam_AGAP001090	0.782125	0.274878802508777	2.84534631669093	0.0044363161169822	0.0188009310834285	Fem.Oenocytes vs Female total carcass cells	Female Oenocytes	1886.33	Female total carcass cells	1173.23	Breast carcinoma amplified sequence 3	FALSE	FALSE	FALSE
Anogam_AGAP004744	-0.494276	0.337861068503832	-1.46295777545395	0.143478933238162	0.267897161476801	Fem.Oenocytes vs Female total carcass cells	Female Oenocytes	1883.53	Female total carcass cells	2840.45	skap succinyl-CoA ligase beta subunit	FALSE	FALSE	FALSE
Anogam_AGAP004626	0.8143	0.350648127022349	2.32227075564901	0.0202183611934406	0.0619013380404801	Fem.Oenocytes vs Female total carcass cells	Female Oenocytes	1881.47	Female total carcass cells	1145.52		FALSE	FALSE	FALSE
Anogam_AGAP004031	-0.961714	0.347688332622699	-2.76602343517003	0.00567444567456482	0.0228316665914854	Fem.Oenocytes vs Female total carcass cells	Female Oenocytes	1880.59	Female total carcass cells	3918.64	mitochondrial electron transfer flavoprotein subunit alpha	FALSE	FALSE	FALSE
Anogam_AGAP006478	2.19026	0.633556814496825	3.45708044849859	0.000546061805478603	0.00345108362795371	Fem.Oenocytes vs Female total carcass cells	Female Oenocytes	1873.1	Female total carcass cells	438.316	Synaptic vesicle membrane protein VAT-1 homolog-like	FALSE	FALSE	FALSE
Anogam_AGAP012357	2.56203	0.60619673369961	4.22640000729055	2.37459718714653e-05	0.000249967884967935	Fem.Oenocytes vs Female total carcass cells	Female Oenocytes	1872.68	Female total carcass cells	339.262	Vanin-like protein 1	TRUE	FALSE	TRUE
Anogam_AGAP009651	0.865095	0.269417988866913	3.21097672552952	0.00132284648379612	0.0071089103057783	Fem.Oenocytes vs Female total carcass cells	Female Oenocytes	1871.43	Female total carcass cells	1099.49	CD63 antigen	FALSE	FALSE	FALSE
Anogam_AGAP007917	1.81262	0.43439959447108	4.17269643967037	3.01015876322518e-05	0.000305252175077502	Fem.Oenocytes vs Female total carcass cells	Female Oenocytes	1870.53	Female total carcass cells	568.899	ABCC12 ATP-binding cassette transporter (ABC transporter) family C member 12	TRUE	FALSE	TRUE
Anogam_AGAP009919	0.740604	0.259096588633291	2.85840724416413	0.00425773567069145	0.0181597129564464	Fem.Oenocytes vs Female total carcass cells	Female Oenocytes	1868.3	Female total carcass cells	1195.77	transmembrane 9 superfamily member 2-4	FALSE	FALSE	FALSE
Anogam_AGAP009224	1.50874	0.507523356416556	2.97275752336502	0.002951375076822	0.0134995394662685	Fem.Oenocytes vs Female total carcass cells	Female Oenocytes	1866.63	Female total carcass cells	700.645		FALSE	FALSE	FALSE
Anogam_AGAP007801	0.742119	0.517290364499378	1.43462659876228	0.15139353080191	0.277758401858551	Fem.Oenocytes vs Female total carcass cells	Female Oenocytes	1864.12	Female total carcass cells	1190.76	vrille	FALSE	FALSE	FALSE
Anogam_AGAP001468	1.34117	0.426616375158705	3.143738597608	0.00166804370664997	0.00854653140032171	Fem.Oenocytes vs Female total carcass cells	Female Oenocytes	1863.56	Female total carcass cells	787.148		FALSE	FALSE	FALSE
Anogam_AGAP011833	-0.911143	0.410703789073657	-2.21849082402144	0.0265213845509671	0.0763380250993074	Fem.Oenocytes vs Female total carcass cells	Female Oenocytes	1863.33	Female total carcass cells	3747.38	enoyl-CoA hydratase	FALSE	FALSE	FALSE
Anogam_AGAP008184	2.06689	0.371616700780489	5.56189702483541	2.66857750361748e-08	7.09217792649717e-07	Fem.Oenocytes vs Female total carcass cells	Female Oenocytes	1858.65	Female total carcass cells	473.448	phospholipid-translocating ATPase	TRUE	FALSE	TRUE
Anogam_AGAP007710	1.07313	0.373268113350808	2.87496308791355	0.00404074734089546	0.0174495399323759	Fem.Oenocytes vs Female total carcass cells	Female Oenocytes	1855.59	Female total carcass cells	943.589	mucolipin	FALSE	FALSE	FALSE
Anogam_AGAP004670	1.64743	0.386737429428656	4.2598064174056	2.04604030440341e-05	0.000220137585643068	Fem.Oenocytes vs Female total carcass cells	Female Oenocytes	1846.93	Female total carcass cells	631.04		TRUE	FALSE	TRUE
Anogam_AGAP004372	2.2321	0.438227868119277	5.0934665331872	3.51575134597841e-07	6.66169773556502e-06	Fem.Oenocytes vs Female total carcass cells	Female Oenocytes	1846.54	Female total carcass cells	419.742	elongation of very long chain fatty acids protein 1	TRUE	FALSE	TRUE
Anogam_AGAP007258	0.860264	0.299490784945995	2.87242177408106	0.00407338911850388	0.0175638084536585	Fem.Oenocytes vs Female total carcass cells	Female Oenocytes	1845.6	Female total carcass cells	1087.79	aconitate hydratase 1 - homoaconitase	FALSE	FALSE	FALSE
Anogam_AGAP005771	1.76577	0.338985921953265	5.20898939868142	1.89871960514097e-07	3.89332645286622e-06	Fem.Oenocytes vs Female total carcass cells	Female Oenocytes	1844.46	Female total carcass cells	580.066	DnaJ homolog subfamily C member 13	TRUE	FALSE	TRUE
Anogam_AGAP007806	0.00634682	0.253684847667328	0.0250185306915085	0.980040182879994	0.989368661677608	Fem.Oenocytes vs Female total carcass cells	Female Oenocytes	1844.32	Female total carcass cells	1963.33	myosin light chain2C invertebrate	FALSE	FALSE	FALSE
Anogam_AGAP006367	3.5332	0.836093684499329	4.22584207664929	2.38048900260359e-05	0.000250330559862692	Fem.Oenocytes vs Female total carcass cells	Female Oenocytes	1844.31	Female total carcass cells	169.782		TRUE	FALSE	TRUE
Anogam_AGAP006911	-1.91153	0.678351103481403	-2.81790249273677	0.00483384870522542	0.0201138430060457	Fem.Oenocytes vs Female total carcass cells	Female Oenocytes	1839.17	Female total carcass cells	7386.76	SRPN2 serine protease inhibitor (serpin) 2	FALSE	FALSE	FALSE
Anogam_AGAP002235	3.67968	0.554724879793085	6.63334397402334	3.28165842049234e-11	2.10358103183721e-09	Fem.Oenocytes vs Female total carcass cells	Female Oenocytes	1838.29	Female total carcass cells	153.893	GATA-binding protein 4-5-6	TRUE	FALSE	TRUE
Anogam_AGAP003121	1.73557	0.303707214783601	5.71460727069207	1.09957669031047e-08	3.30907902801668e-07	Fem.Oenocytes vs Female total carcass cells	Female Oenocytes	1835.71	Female total carcass cells	589.771	phosphatidylinositol 4-kinase type 2	TRUE	FALSE	TRUE
Anogam_AGAP001099	0.160927	0.23065700570333	0.69768792814312	0.485372379297738	0.628728976449482	Fem.Oenocytes vs Female total carcass cells	Female Oenocytes	1835.48	Female total carcass cells	1754.76	Polybromo-1	FALSE	FALSE	FALSE
Anogam_AGAP006992	2.6632	0.415696187851076	6.40661249450592	1.48788338470942e-10	7.65026270972203e-09	Fem.Oenocytes vs Female total carcass cells	Female Oenocytes	1833.74	Female total carcass cells	309.609		TRUE	FALSE	TRUE
Anogam_AGAP003023	1.31756	0.286783763167218	4.59425623217501	4.34295475041393e-06	5.91705898884626e-05	Fem.Oenocytes vs Female total carcass cells	Female Oenocytes	1832.59	Female total carcass cells	786.596	syntaxin-binding protein 1	TRUE	FALSE	TRUE
Anogam_AGAP002896	1.75555	0.370523351728649	4.7380218317828	2.15814566638823e-06	3.19567966114101e-05	Fem.Oenocytes vs Female total carcass cells	Female Oenocytes	1832.43	Female total carcass cells	580.702	RNA-binding protein Nova	TRUE	FALSE	TRUE
Anogam_AGAP008837	1.35848	0.39666234465525	3.42478106708438	0.000615295031798575	0.00380880161171978	Fem.Oenocytes vs Female total carcass cells	Female Oenocytes	1832.19	Female total carcass cells	765.006	20S proteasome subunit beta 4	FALSE	FALSE	FALSE
Anogam_AGAP004801	2.42798	0.438872625008717	5.53230478135551	3.1605011041011e-08	8.20767697897524e-07	Fem.Oenocytes vs Female total carcass cells	Female Oenocytes	1825.89	Female total carcass cells	362.504	Huntingtin interacting protein	TRUE	FALSE	TRUE
Anogam_AGAP004742	-2.20199	0.510517431939099	-4.31324775112337	1.60873668065987e-05	0.000182176122283069	Fem.Oenocytes vs Female total carcass cells	Female Oenocytes	1824.35	Female total carcass cells	8985.91	Pyruvate carboxylase	FALSE	TRUE	TRUE
Anogam_AGAP006767	1.62434	0.43079655601189	3.77055476978843	0.000162885048466023	0.00126297793820869	Fem.Oenocytes vs Female total carcass cells	Female Oenocytes	1821.05	Female total carcass cells	631.751	NAD kinase domain-containing protein 1	FALSE	FALSE	FALSE
Anogam_AGAP004942	1.08607	0.25311723440325	4.29077587963574	1.78049940053262e-05	0.000197740167382546	Fem.Oenocytes vs Female total carcass cells	Female Oenocytes	1819.42	Female total carcass cells	915.695	poly(rC)-binding protein 2-3-4	TRUE	FALSE	TRUE
Anogam_AGAP013442	-0.816046	0.554487723441371	-1.47171194115718	0.14109868162121	0.26490306611894	Fem.Oenocytes vs Female total carcass cells	Female Oenocytes	1819.13	Female total carcass cells	3433.61	CLIPB9 CLIP-domain serine protease	FALSE	FALSE	FALSE
Anogam_AGAP009979	2.30305	0.428261623143847	5.37767716212205	7.54529544641418e-08	1.73881673440788e-06	Fem.Oenocytes vs Female total carcass cells	Female Oenocytes	1817.06	Female total carcass cells	393.825	glycoprotein-N-acetylgalactosamine 3-beta-galactosyltransferase	TRUE	FALSE	TRUE
Anogam_AGAP007996	0.559398	0.244663383171905	2.28639745637848	0.0222310170109071	0.0668040428944496	Fem.Oenocytes vs Female total carcass cells	Female Oenocytes	1813.94	Female total carcass cells	1316.38	nuclear receptor-binding protein	FALSE	FALSE	FALSE
Anogam_AGAP010517	-0.353336	0.277976717040505	-1.27109957899164	0.203693225104383	0.343925590638291	Fem.Oenocytes vs Female total carcass cells	Female Oenocytes	1813.62	Female total carcass cells	2479.45	MnSOD1 manganese-iron superoxide dismutase 1	FALSE	FALSE	FALSE
Anogam_AGAP002606	0.902916	0.365608619822499	2.46962393449197	0.0135255157899433	0.0451674535126304	Fem.Oenocytes vs Female total carcass cells	Female Oenocytes	1812.07	Female total carcass cells	1037.11	26S proteasome regulatory subunit N12	FALSE	FALSE	FALSE
Anogam_AGAP000586	-2.70385	0.557863225351407	-4.84680352936145	1.25466568785748e-06	1.99653799660307e-05	Fem.Oenocytes vs Female total carcass cells	Female Oenocytes	1811.29	Female total carcass cells	12593.2		FALSE	TRUE	TRUE
Anogam_AGAP006340	1.95471	0.577951995514545	3.38213403579762	0.000719250412502223	0.00434437439239831	Fem.Oenocytes vs Female total carcass cells	Female Oenocytes	1790.34	Female total carcass cells	493.501	misshapen-NIK-related kinase	FALSE	FALSE	FALSE
Anogam_AGAP007940	0.311628	0.288157300449341	1.08144985728486	0.27949705402519	0.430306027202188	Fem.Oenocytes vs Female total carcass cells	Female Oenocytes	1788.84	Female total carcass cells	1541.23	Reticulon-like protein	FALSE	FALSE	FALSE
Anogam_AGAP011586	2.33022	0.439805447366902	5.29830460626954	1.16882863167119e-07	2.54456479984247e-06	Fem.Oenocytes vs Female total carcass cells	Female Oenocytes	1784.28	Female total carcass cells	378.497	protein-tyrosine phosphatase	TRUE	FALSE	TRUE
Anogam_AGAP007494	0.992826	0.300954876604214	3.2989203353236	0.000970574511849814	0.00555110028241884	Fem.Oenocytes vs Female total carcass cells	Female Oenocytes	1784.08	Female total carcass cells	958.956	flotillin	FALSE	FALSE	FALSE
Anogam_AGAP010292	0.605955	0.343949097420172	1.76175748761941	0.0781102803055211	0.170920527819951	Fem.Oenocytes vs Female total carcass cells	Female Oenocytes	1782.37	Female total carcass cells	1250.79	guanine nucleotide exchange factor VAV	FALSE	FALSE	FALSE
Anogam_AGAP007297	-0.831329	0.316071485169989	-2.63019206343335	0.00853366412854402	0.0313749376080713	Fem.Oenocytes vs Female total carcass cells	Female Oenocytes	1781.27	Female total carcass cells	3390.78	NADH dehydrogenase (ubiquinone) 1 beta subcomplex 5	FALSE	FALSE	FALSE
Anogam_AGAP004657	-0.187698	0.342487714925489	-0.548042865961012	0.583662469644285	0.709942271683348	Fem.Oenocytes vs Female total carcass cells	Female Oenocytes	1781.26	Female total carcass cells	2169.93	mitochondrial inner membrane translocase subunit (TIM17)	FALSE	FALSE	FALSE
Anogam_AGAP003238	0.781299	0.379171317111601	2.06054385939302	0.0393465774397823	0.102965263520167	Fem.Oenocytes vs Female total carcass cells	Female Oenocytes	1777.9	Female total carcass cells	1104.76	N-myc downstream regulated	FALSE	FALSE	FALSE
Anogam_AGAP003002	-0.664021	0.260513541211229	-2.54889272307882	0.0108065536594223	0.0378414295151296	Fem.Oenocytes vs Female total carcass cells	Female Oenocytes	1775.86	Female total carcass cells	3007.97	AdoMet-dependent rRNA methyltransferase	FALSE	FALSE	FALSE
Anogam_AGAP001043	0.974562	0.424349065144417	2.2966037136764	0.0216413866085376	0.0654164454294111	Fem.Oenocytes vs Female total carcass cells	Female Oenocytes	1775.53	Female total carcass cells	965.145	arm Armadillo segment polarity protein	FALSE	FALSE	FALSE
Anogam_AGAP007713	0.352184	0.318091313256513	1.10717769249813	0.268217110228892	0.417018306011551	Fem.Oenocytes vs Female total carcass cells	Female Oenocytes	1775.2	Female total carcass cells	1487.77	solute carrier family 39 (zinc transporter)2C member 11	FALSE	FALSE	FALSE
Anogam_AGAP006116	1.91402	0.303924085647643	6.29767602806486	3.02141161842076e-10	1.43791086882238e-08	Fem.Oenocytes vs Female total carcass cells	Female Oenocytes	1771.41	Female total carcass cells	502.363	TBC1 domain family2C member 8B (with GRAM domain)	TRUE	FALSE	TRUE
Anogam_AGAP000721	1.24823	0.323080054630545	3.86354665467485	0.000111752537377026	0.000919443099955356	Fem.Oenocytes vs Female total carcass cells	Female Oenocytes	1769	Female total carcass cells	797.298	V-type H+-transporting ATPase subunit AC39	TRUE	FALSE	TRUE
Anogam_AGAP006936	-1.22459	0.316418702585726	-3.870157479103	0.000108765072232702	0.0009002753309329	Fem.Oenocytes vs Female total carcass cells	Female Oenocytes	1768.5	Female total carcass cells	4421.24	mitochondrial cytochrome c1 heme protein	FALSE	TRUE	TRUE
Anogam_AGAP012906	-0.94742	0.289301425796372	-3.27485509648836	0.00105716183966557	0.00591517959837844	Fem.Oenocytes vs Female total carcass cells	Female Oenocytes	1767.52	Female total carcass cells	3645.56	60S ribosomal protein L6	FALSE	FALSE	FALSE
Anogam_AGAP002061	1.0803	0.355291275870784	3.04061622264359	0.00236094552261513	0.0113201474167751	Fem.Oenocytes vs Female total carcass cells	Female Oenocytes	1764.51	Female total carcass cells	893.227	26S proteasome regulatory subunit N7	FALSE	FALSE	FALSE
Anogam_AGAP029051	0.592154	0.297138098536561	1.99285724740736	0.0462770809479432	0.116314622756481	Fem.Oenocytes vs Female total carcass cells	Female Oenocytes	1764.02	Female total carcass cells	1251.07		FALSE	FALSE	FALSE
Anogam_AGAP008148	2.33713	0.434563567923956	5.37810524817402	7.52738110390158e-08	1.73860414119912e-06	Fem.Oenocytes vs Female total carcass cells	Female Oenocytes	1760.4	Female total carcass cells	372.903	RING finger and SPRY domain-containing protein 1	TRUE	FALSE	TRUE
Anogam_AGAP000347	3.24238	0.444195523776422	7.29944833051129	2.88949999402855e-13	3.60553218767075e-11	Fem.Oenocytes vs Female total carcass cells	Female Oenocytes	1755.55	Female total carcass cells	197.983	CAPA pyrokinin capa-like	TRUE	FALSE	TRUE
Anogam_AGAP002816	1.80252	0.432839955051899	4.16439749342852	3.12175839492264e-05	0.000314697851200477	Fem.Oenocytes vs Female total carcass cells	Female Oenocytes	1753.7	Female total carcass cells	538.012	ERO1-like protein alpha	TRUE	FALSE	TRUE
Anogam_AGAP006246	1.61346	0.33545243821451	4.80978902414731	1.51089682832821e-06	2.33880428857099e-05	Fem.Oenocytes vs Female total carcass cells	Female Oenocytes	1751.36	Female total carcass cells	611.91	Sorcin	TRUE	FALSE	TRUE
Anogam_AGAP008909	-0.130544	0.334764493827656	-0.389956530201281	0.696568691176517	0.797560186683695	Fem.Oenocytes vs Female total carcass cells	Female Oenocytes	1749.69	Female total carcass cells	2049.73		FALSE	FALSE	FALSE
Anogam_AGAP011551	1.18047	0.367424578759096	3.21281470805883	0.00131441058126602	0.00707100371583275	Fem.Oenocytes vs Female total carcass cells	Female Oenocytes	1748.02	Female total carcass cells	823.608	protein transport protein SEC31	FALSE	FALSE	FALSE
Anogam_AGAP010382	0.380255	0.298032054484053	1.27588493393305	0.201996197628322	0.341747434617247	Fem.Oenocytes vs Female total carcass cells	Female Oenocytes	1747.25	Female total carcass cells	1435.42	Ars2 Serrate RNA effector molecule homolog	FALSE	FALSE	FALSE
Anogam_AGAP009347	0.832821	0.426658539657427	1.951961180041	0.050942813696087	0.124640571434329	Fem.Oenocytes vs Female total carcass cells	Female Oenocytes	1745.08	Female total carcass cells	1046.13	FK506-binding protein 4-5	FALSE	FALSE	FALSE
Anogam_AGAP000235	1.80662	0.386880297519557	4.6697017989337	3.01637266911036e-06	4.2985411072893e-05	Fem.Oenocytes vs Female total carcass cells	Female Oenocytes	1743.33	Female total carcass cells	532.599	Thymosin	TRUE	FALSE	TRUE
Anogam_AGAP001512	1.42779	0.475070158159918	3.00541926638911	0.00265214992329334	0.0124139057708771	Fem.Oenocytes vs Female total carcass cells	Female Oenocytes	1734.65	Female total carcass cells	690.583	glutamate--cysteine ligase catalytic subunit	FALSE	FALSE	FALSE
Anogam_AGAP005082	0.724151	0.23372020902181	3.09836607922267	0.0019459089508316	0.00965125563980073	Fem.Oenocytes vs Female total carcass cells	Female Oenocytes	1733.88	Female total carcass cells	1122.61		FALSE	FALSE	FALSE
Anogam_AGAP001827	0.801206	0.3575936441648	2.24054761161121	0.0250553934324792	0.0730144402802733	Fem.Oenocytes vs Female total carcass cells	Female Oenocytes	1733.29	Female total carcass cells	1062.69	hypoxia up-regulated 1	FALSE	FALSE	FALSE
Anogam_AGAP002182	-0.680322	0.241123226494172	-2.8214720000629	0.0047803810382829	0.019948147954205	Fem.Oenocytes vs Female total carcass cells	Female Oenocytes	1729.64	Female total carcass cells	2962.39	ABCE1 ATP-binding cassette transporter (ABC transporter) family E member 1	FALSE	FALSE	FALSE
Anogam_AGAP008521	-0.87742	0.516538457770625	-1.69865379664872	0.0893844337788342	0.1882629737392	Fem.Oenocytes vs Female total carcass cells	Female Oenocytes	1728.36	Female total carcass cells	3390.69	low density lipoprotein receptor adapter protein 1	FALSE	FALSE	FALSE
Anogam_AGAP003615	1.19754	0.302414800988505	3.959923059992	7.49739147802718e-05	0.000654550423235274	Fem.Oenocytes vs Female total carcass cells	Female Oenocytes	1725.83	Female total carcass cells	804.933	toll-interacting protein	TRUE	FALSE	TRUE
Anogam_AGAP000941	1.32412	0.423345109636662	3.12776612867762	0.00176140276710266	0.00893538577738937	Fem.Oenocytes vs Female total carcass cells	Female Oenocytes	1725.7	Female total carcass cells	738.131		FALSE	FALSE	FALSE
Anogam_AGAP000528	1.77019	0.494867233800888	3.57711050178651	0.000347413335208499	0.00239426229440826	Fem.Oenocytes vs Female total carcass cells	Female Oenocytes	1723.31	Female total carcass cells	539.558		FALSE	FALSE	FALSE
Anogam_AGAP004773	-1.09295	0.361737967869697	-3.0213889596835	0.00251617909385661	0.0119093514834586	Fem.Oenocytes vs Female total carcass cells	Female Oenocytes	1722.09	Female total carcass cells	3930.81	pyruvate dehydrogenase E1 component subunit alpha2C mitochondrial	FALSE	FALSE	FALSE
Anogam_AGAP000868	2.07941	0.425140232284958	4.89112667237974	1.00260411488518e-06	1.65653804418829e-05	Fem.Oenocytes vs Female total carcass cells	Female Oenocytes	1720.94	Female total carcass cells	435.222	beta-12C4-mannosyltransferase egghead protein	TRUE	FALSE	TRUE
Anogam_AGAP002525	-0.428947	0.291939856928618	-1.46930019930038	0.141751382795882	0.265455225957701	Fem.Oenocytes vs Female total carcass cells	Female Oenocytes	1717.25	Female total carcass cells	2473.67	eukaryotic translation initiation factor 2A	FALSE	FALSE	FALSE
Anogam_AGAP010315	0.55742	0.278849420162653	1.9990012459525	0.0456082190558436	0.115168632127194	Fem.Oenocytes vs Female total carcass cells	Female Oenocytes	1716.43	Female total carcass cells	1247.55	nardilysin	FALSE	FALSE	FALSE
Anogam_AGAP008645	3.0013	1.94565401448487	1.54256602216406	NA	NA	Fem.Oenocytes vs Female total carcass cells	Female Oenocytes	1716.04	Female total carcass cells	227.972	GAM1 gambicin anti-microbial peptide	FALSE	FALSE	FALSE
Anogam_AGAP007532	1.34155	0.401151188394943	3.34425776940891	0.000825030417601544	0.00483765686699083	Fem.Oenocytes vs Female total carcass cells	Female Oenocytes	1715.86	Female total carcass cells	723.721	vinculin	FALSE	FALSE	FALSE
Anogam_AGAP008501	0.533496	0.329855567247516	1.61736103264601	0.105800371975585	0.214060899129058	Fem.Oenocytes vs Female total carcass cells	Female Oenocytes	1715.85	Female total carcass cells	1267.7	glutaryl-CoA dehydrogenase	FALSE	FALSE	FALSE
Anogam_AGAP002440	1.00542	0.310496298614331	3.23809922389728	0.00120328951854177	0.00655943439196558	Fem.Oenocytes vs Female total carcass cells	Female Oenocytes	1715.03	Female total carcass cells	913.817	Cdc42 cell division cycle Cdc42 homolog	FALSE	FALSE	FALSE
Anogam_AGAP009928	0.784041	0.401047834632462	1.95498232727821	0.0505851562441249	0.124032427196234	Fem.Oenocytes vs Female total carcass cells	Female Oenocytes	1714.19	Female total carcass cells	1065.49		FALSE	FALSE	FALSE
Anogam_AGAP000794	-0.513139	0.284169337743336	-1.80574990309334	0.0709574138667876	0.159393251083418	Fem.Oenocytes vs Female total carcass cells	Female Oenocytes	1712.78	Female total carcass cells	2613.88	NADH dehydrogenase (ubiquinone) Fe-S protein 2	FALSE	FALSE	FALSE
Anogam_AGAP028024	1.10627	0.333489133593508	3.31726603376769	0.000909030150740364	0.00525491327817819	Fem.Oenocytes vs Female total carcass cells	Female Oenocytes	1711.03	Female total carcass cells	850.547		FALSE	FALSE	FALSE
Anogam_AGAP006520	2.16397	0.617870704920689	3.50229904769887	0.000461261584428035	0.00301188802288938	Fem.Oenocytes vs Female total carcass cells	Female Oenocytes	1710.09	Female total carcass cells	409.577	Fatty acid elongase 2	FALSE	FALSE	FALSE
Anogam_AGAP001761	1.38687	0.447537911113558	3.09888978567113	0.00194247266039435	0.00964046499678639	Fem.Oenocytes vs Female total carcass cells	Female Oenocytes	1705.36	Female total carcass cells	696.895	ceramide synthetase	FALSE	FALSE	FALSE
Anogam_AGAP029139	0.266151	0.265138773974431	1.00381674385094	0.315466952221194	0.468620478386652	Fem.Oenocytes vs Female total carcass cells	Female Oenocytes	1704.86	Female total carcass cells	1516.17		FALSE	FALSE	FALSE
Anogam_AGAP007827	-0.463961	0.313853715000157	-1.47827188350923	0.13933502020253	0.262470687893007	Fem.Oenocytes vs Female total carcass cells	Female Oenocytes	1704.13	Female total carcass cells	2515.84	Eno enolase	FALSE	FALSE	FALSE
Anogam_AGAP029113	0.132702	0.285682484266111	0.464509320546638	0.64228288333214	0.75547218057165	Fem.Oenocytes vs Female total carcass cells	Female Oenocytes	1702.06	Female total carcass cells	1658.68		FALSE	FALSE	FALSE
Anogam_AGAP005327	-1.29801	0.2983999365873	-4.34988603407193	1.36208302782729e-05	0.000159096273295991	Fem.Oenocytes vs Female total carcass cells	Female Oenocytes	1698.63	Female total carcass cells	4467.15	ribonuclease UK114	FALSE	TRUE	TRUE
Anogam_AGAP011438	-0.382004	0.260898277037605	-1.46418758912998	0.143142700304358	0.267464592679727	Fem.Oenocytes vs Female total carcass cells	Female Oenocytes	1698.27	Female total carcass cells	2366.55	Casein kinase II subunit beta	FALSE	FALSE	FALSE
Anogam_AGAP008601	-0.265597	0.246264766364468	-1.0785007863162	0.28081033104402	0.43109546995385	Fem.Oenocytes vs Female total carcass cells	Female Oenocytes	1696.74	Female total carcass cells	2182.13	ATP-dependent RNA helicase DDX18-HAS1	FALSE	FALSE	FALSE
Anogam_AGAP010718	1.36419	0.468344957867947	2.91278329844905	0.00358223098410492	0.0157784706970992	Fem.Oenocytes vs Female total carcass cells	Female Oenocytes	1696.22	Female total carcass cells	705.716	20S proteasome subunit beta 5	FALSE	FALSE	FALSE
Anogam_AGAP004210	1.70072	0.232847674979054	7.30401928821415	2.79296314077412e-13	3.52809862424702e-11	Fem.Oenocytes vs Female total carcass cells	Female Oenocytes	1695.29	Female total carcass cells	557.929		TRUE	FALSE	TRUE
Anogam_AGAP004315	0.656349	0.415314496700077	1.58036513376116	0.114023271456362	0.226090648761705	Fem.Oenocytes vs Female total carcass cells	Female Oenocytes	1694.4	Female total carcass cells	1150.74		FALSE	FALSE	FALSE
Anogam_AGAP007684	1.34273	0.329239224255828	4.07827849863209	4.53703990429831e-05	0.00042769202402028	Fem.Oenocytes vs Female total carcass cells	Female Oenocytes	1692.45	Female total carcass cells	714.003	Tubulointerstitial nephritis antigen	TRUE	FALSE	TRUE
Anogam_AGAP007584	0.199206	0.388308303868114	0.5130092460629	0.607944852998717	0.729762052543744	Fem.Oenocytes vs Female total carcass cells	Female Oenocytes	1689.69	Female total carcass cells	1575.72		FALSE	FALSE	FALSE
Anogam_AGAP004256	1.77363	0.67478039498133	2.62845121540343	0.0085774657527617	0.0315070820691269	Fem.Oenocytes vs Female total carcass cells	Female Oenocytes	1687.34	Female total carcass cells	526.953		FALSE	FALSE	FALSE
Anogam_AGAP028373	0.132693	0.378796934617901	0.350301918793043	0.726112125398254	0.818957150250765	Fem.Oenocytes vs Female total carcass cells	Female Oenocytes	1686.48	Female total carcass cells	1645.78	ND3 NADH dehydrogenase subunit 3	FALSE	FALSE	FALSE
Anogam_AGAP006935	-0.945605	0.238782966392767	-3.96010174931236	7.49178356641936e-05	0.000654550423235274	Fem.Oenocytes vs Female total carcass cells	Female Oenocytes	1683	Female total carcass cells	3463.56		FALSE	FALSE	FALSE
Anogam_AGAP007396	0.762086	0.305246503728413	2.49662430407315	0.0125381716098308	0.0426076421791881	Fem.Oenocytes vs Female total carcass cells	Female Oenocytes	1682.6	Female total carcass cells	1060.44	epsin	FALSE	FALSE	FALSE
Anogam_AGAP000770	1.31955	0.325027602743639	4.05979700321863	4.91153974577354e-05	0.000458111893151822	Fem.Oenocytes vs Female total carcass cells	Female Oenocytes	1681.78	Female total carcass cells	721.336	vacuole morphology and inheritance protein 14	TRUE	FALSE	TRUE
Anogam_AGAP006139	1.72602	0.37086457320311	4.65403742945082	3.25497676808217e-06	4.60648994343247e-05	Fem.Oenocytes vs Female total carcass cells	Female Oenocytes	1681.41	Female total carcass cells	543.237	vacuolar protein sorting 262C vps26	TRUE	FALSE	TRUE
Anogam_AGAP006653	1.57986	0.335642988371588	4.70695801635558	2.51440666522405e-06	3.69646681013972e-05	Fem.Oenocytes vs Female total carcass cells	Female Oenocytes	1679.58	Female total carcass cells	601.373	Protein rogdi	TRUE	FALSE	TRUE
Anogam_AGAP003331	0.103407	0.536912504343121	0.192594762160881	0.847276347322003	0.904374252639134	Fem.Oenocytes vs Female total carcass cells	Female Oenocytes	1679.37	Female total carcass cells	1675.63	Enolase-phosphatase E1	FALSE	FALSE	FALSE
Anogam_AGAP004263	-3.00867	0.613456589546799	-4.90446088890443	9.36842852421485e-07	1.55866277495555e-05	Fem.Oenocytes vs Female total carcass cells	Female Oenocytes	1669.11	Female total carcass cells	14304.9	TO1 takeout 1	FALSE	TRUE	TRUE
Anogam_AGAP006379	2.82732	0.583072781441257	4.84899829006207	1.24086490765702e-06	1.97765260672066e-05	Fem.Oenocytes vs Female total carcass cells	Female Oenocytes	1663.24	Female total carcass cells	250.473	ABCA1 ATP-binding cassette transporter (ABC transporter) family A member 1	TRUE	FALSE	TRUE
Anogam_AGAP003243	0.152648	0.32733238754088	0.466340314181368	0.640971926604742	0.754448953528094	Fem.Oenocytes vs Female total carcass cells	Female Oenocytes	1662.92	Female total carcass cells	1600.68		FALSE	FALSE	FALSE
Anogam_AGAP004948	0.0274478	0.432018479411385	0.0635337803852392	0.949341460712152	0.970298853861427	Fem.Oenocytes vs Female total carcass cells	Female Oenocytes	1661.56	Female total carcass cells	1743.56	duplex-specific nuclease	FALSE	FALSE	FALSE
Anogam_AGAP009146	-1.94646	0.406582545510537	-4.78736925688864	1.68981751466143e-06	2.55772378846386e-05	Fem.Oenocytes vs Female total carcass cells	Female Oenocytes	1660.4	Female total carcass cells	6831.56		FALSE	TRUE	TRUE
Anogam_AGAP005535	0.777741	0.319320310552911	2.43561348203885	0.0148665605466836	0.0486766872043734	Fem.Oenocytes vs Female total carcass cells	Female Oenocytes	1659.03	Female total carcass cells	1035.97	26S proteasome regulatory subunit N5	FALSE	FALSE	FALSE
Anogam_AGAP004528	0.79849	0.409687801864983	1.94901964550763	0.0512930786599022	0.125347690673064	Fem.Oenocytes vs Female total carcass cells	Female Oenocytes	1654.81	Female total carcass cells	1016.79		FALSE	FALSE	FALSE
Anogam_AGAP001243	3.26425	0.659140120056011	4.95227876977321	7.33494238496262e-07	1.26990068499048e-05	Fem.Oenocytes vs Female total carcass cells	Female Oenocytes	1654.69	Female total carcass cells	183.891		TRUE	FALSE	TRUE
Anogam_AGAP001324	1.1917	0.272481778850552	4.3735181510138	1.22260074423655e-05	0.000145040185732474	Fem.Oenocytes vs Female total carcass cells	Female Oenocytes	1654.56	Female total carcass cells	775.121	Erythroid differentiation-related factor 1	TRUE	FALSE	TRUE
Anogam_AGAP002922	1.15918	0.31534015003177	3.67598063623563	0.000236937495380877	0.00172183554881899	Fem.Oenocytes vs Female total carcass cells	Female Oenocytes	1654.19	Female total carcass cells	792.243	Secretory carrier-associated membrane protein	FALSE	FALSE	FALSE
Anogam_AGAP000994	1.19584	0.377897749649568	3.16445860759549	0.00155371760679266	0.00806986728563579	Fem.Oenocytes vs Female total carcass cells	Female Oenocytes	1654.08	Female total carcass cells	773.131	lysosomal Pro-X carboxypeptidase	FALSE	FALSE	FALSE
Anogam_AGAP006228	1.65963	0.393766949811818	4.21475100252043	2.50053914223831e-05	0.000261343375928319	Fem.Oenocytes vs Female total carcass cells	Female Oenocytes	1652.79	Female total carcass cells	560.041	COEAE2F carboxylesterase	TRUE	FALSE	TRUE
Anogam_AGAP009491	-0.714831	0.314009450178972	-2.27646220986609	0.0228183599467375	0.0680097462787703	Fem.Oenocytes vs Female total carcass cells	Female Oenocytes	1651.49	Female total carcass cells	2900.32	F-type H+-transporting ATPase subunit g	FALSE	FALSE	FALSE
Anogam_AGAP002071	1.39862	0.630743328536716	2.21741403397854	0.0265948115762681	0.0764376719237009	Fem.Oenocytes vs Female total carcass cells	Female Oenocytes	1649.05	Female total carcass cells	668.51	ABCD1 ATP-binding cassette transporter (ABC transporter) family D member 1	FALSE	FALSE	FALSE
Anogam_AGAP006389	0.587068	0.343426928706117	1.70944147069683	0.0873692046507714	0.185114990339706	Fem.Oenocytes vs Female total carcass cells	Female Oenocytes	1648.23	Female total carcass cells	1174.64	ribonuclease kappa	FALSE	FALSE	FALSE
Anogam_AGAP002339	1.7691	0.31433567516572	5.62805593067224	1.8225199913586e-08	5.13520667892865e-07	Fem.Oenocytes vs Female total carcass cells	Female Oenocytes	1648.22	Female total carcass cells	517.644	AN1-type zinc finger protein 2B	TRUE	FALSE	TRUE
Anogam_AGAP011537	0.242193	0.303284211710871	0.798569424628257	0.424540122560037	0.574665237998981	Fem.Oenocytes vs Female total carcass cells	Female Oenocytes	1647.52	Female total carcass cells	1489.85	Argonaute 3	FALSE	FALSE	FALSE
Anogam_AGAP003069	0.463693	0.260743420380282	1.77834809937085	0.075346701128512	0.166511327418345	Fem.Oenocytes vs Female total carcass cells	Female Oenocytes	1646.65	Female total carcass cells	1275.76	signal peptidase2C endoplasmic reticulum-type	FALSE	FALSE	FALSE
Anogam_AGAP007088	1.91821	0.354306271563322	5.4139905689657	6.16354138954726e-08	1.45647472281403e-06	Fem.Oenocytes vs Female total carcass cells	Female Oenocytes	1646.25	Female total carcass cells	465.215	peptidyl-prolyl cis-trans isomerase B (cyclophilin B)	TRUE	FALSE	TRUE
Anogam_AGAP001065	-3.34161	0.453599671638476	-7.36686241448068	1.7469060750529e-13	2.38916690443391e-11	Fem.Oenocytes vs Female total carcass cells	Female Oenocytes	1645.28	Female total carcass cells	17814.1	glycine hydroxymethyltransferase	FALSE	TRUE	TRUE
Anogam_AGAP005543	1.60519	0.270127112930168	5.94236523934753	2.809385902647e-09	9.98112380412641e-08	Fem.Oenocytes vs Female total carcass cells	Female Oenocytes	1637.76	Female total carcass cells	576.169	syntaxin 7	TRUE	FALSE	TRUE
Anogam_AGAP007397	-0.467815	0.274648437188857	-1.70332232816715	0.0885077643180138	0.186940670099809	Fem.Oenocytes vs Female total carcass cells	Female Oenocytes	1635.15	Female total carcass cells	2417.82	YrdC domain-containing protein2C mitochondrial	FALSE	FALSE	FALSE
Anogam_AGAP007596	1.42952	0.422960038792762	3.37979699502224	0.000725393871235029	0.00437631491183774	Fem.Oenocytes vs Female total carcass cells	Female Oenocytes	1634.72	Female total carcass cells	648.489	septin 7	FALSE	FALSE	FALSE
Anogam_AGAP003153	0.41624	0.329858458226005	1.26187329242064	0.206994383677334	0.34812073204906	Fem.Oenocytes vs Female total carcass cells	Female Oenocytes	1632.68	Female total carcass cells	1308.85	VATA V-type proton ATPase catalytic subunit A	FALSE	FALSE	FALSE
Anogam_AGAP004584	1.54885	0.460597042122997	3.36268989585346	0.000771870178581506	0.00458282772199046	Fem.Oenocytes vs Female total carcass cells	Female Oenocytes	1630.73	Female total carcass cells	595.041		FALSE	FALSE	FALSE
Anogam_AGAP007711	-3.62452	0.537867882710283	-6.73868153916158	1.59830275919249e-11	1.09757274040655e-09	Fem.Oenocytes vs Female total carcass cells	Female Oenocytes	1628.81	Female total carcass cells	21430.9		FALSE	TRUE	TRUE
Anogam_AGAP002655	-0.277008	0.236479691125097	-1.1713827924327	0.241444945797795	0.388498928353992	Fem.Oenocytes vs Female total carcass cells	Female Oenocytes	1623.61	Female total carcass cells	2102.8		FALSE	FALSE	FALSE
Anogam_AGAP001447	0.803979	0.245607180540883	3.27343313303452	0.00106249526420009	0.00593743940103515	Fem.Oenocytes vs Female total carcass cells	Female Oenocytes	1622.69	Female total carcass cells	993.188	solute carrier family 35 (UDP-galactose transporter)2C member B1	FALSE	FALSE	FALSE
Anogam_AGAP001701	0.0983643	0.294260540178069	0.334276191930251	0.738171154245108	0.827886858878241	Fem.Oenocytes vs Female total carcass cells	Female Oenocytes	1622.66	Female total carcass cells	1620.53	Small ubiquitin-related modifier	FALSE	FALSE	FALSE
Anogam_AGAP002032	2.32852	0.605699319154901	3.84434940596721	0.000120872684128365	0.000982342576649272	Fem.Oenocytes vs Female total carcass cells	Female Oenocytes	1622.55	Female total carcass cells	345.193		TRUE	FALSE	TRUE
Anogam_AGAP002323	2.18269	0.380591762312069	5.73499804702482	9.75134697295314e-09	2.96520240086801e-07	Fem.Oenocytes vs Female total carcass cells	Female Oenocytes	1621.55	Female total carcass cells	382.201		TRUE	FALSE	TRUE
Anogam_AGAP011484	-1.21483	0.360861407929595	-3.36646687312235	0.000761377263938534	0.00454251438170209	Fem.Oenocytes vs Female total carcass cells	Female Oenocytes	1618.93	Female total carcass cells	4018.82		FALSE	FALSE	FALSE
Anogam_AGAP004802	-2.62205	0.465275669543483	-5.63546611073794	1.74585475908229e-08	4.94836174374793e-07	Fem.Oenocytes vs Female total carcass cells	Female Oenocytes	1617.84	Female total carcass cells	10616.7	4-hydroxyphenylpyruvate dioxygenase	FALSE	TRUE	TRUE
Anogam_AGAP007722	-1.07141	0.260659732630667	-4.11036304685373	3.95037524743224e-05	0.000380246844136657	Fem.Oenocytes vs Female total carcass cells	Female Oenocytes	1615.59	Female total carcass cells	3628.86	Adk2 adenylate kinase 22C mitochondrial	FALSE	TRUE	TRUE
Anogam_AGAP010169	2.9277	0.851957282376574	3.43643431566945	0.000589425257210226	0.00368642984827324	Fem.Oenocytes vs Female total carcass cells	Female Oenocytes	1614.43	Female total carcass cells	228.352		FALSE	FALSE	FALSE
Anogam_AGAP003578	0.565473	0.415667568198719	1.36039835269716	0.17370389949405	0.307586512396287	Fem.Oenocytes vs Female total carcass cells	Female Oenocytes	1608.93	Female total carcass cells	1163.39	aldehyde dehydrogenase (NAD+)	FALSE	FALSE	FALSE
Anogam_AGAP003084	1.44933	0.474268779837682	3.05591770246794	0.00224372832263799	0.0108342747509353	Fem.Oenocytes vs Female total carcass cells	Female Oenocytes	1603.91	Female total carcass cells	627.841		FALSE	FALSE	FALSE
Anogam_AGAP007650	1.55819	0.439472585244977	3.54559009908317	0.000391735042704102	0.00263526164164916	Fem.Oenocytes vs Female total carcass cells	Female Oenocytes	1599.24	Female total carcass cells	581.872	growth arrest and DNA-damage-inducible protein	FALSE	FALSE	FALSE
Anogam_AGAP001285	1.6998	0.338353770643903	5.02372486357677	5.06788252164493e-07	9.29293440169729e-06	Fem.Oenocytes vs Female total carcass cells	Female Oenocytes	1598.57	Female total carcass cells	526.001	charged multivesicular body protein 2A	TRUE	FALSE	TRUE
Anogam_AGAP009515	-0.266917	0.526637471628902	-0.506833116210099	0.612271918087776	0.732978386085658	Fem.Oenocytes vs Female total carcass cells	Female Oenocytes	1596.89	Female total carcass cells	2050.55	REL1 TOLL pathway signalling NF-kappaB Relish-like transcription factor	FALSE	FALSE	FALSE
Anogam_AGAP009288	1.03152	0.237406280271338	4.34493840733027	1.39314747155458e-05	0.000161801191020959	Fem.Oenocytes vs Female total carcass cells	Female Oenocytes	1596.31	Female total carcass cells	835.271	Derlin-1	FALSE	FALSE	FALSE
Anogam_AGAP002263	0.133143	0.370977352740483	0.35889845586103	0.719671054823722	0.8138455164629	Fem.Oenocytes vs Female total carcass cells	Female Oenocytes	1596.17	Female total carcass cells	1555.03	choline-phosphate cytidylyltransferase	FALSE	FALSE	FALSE
Anogam_AGAP007121	0.877529	0.453240845918962	1.93612113340127	0.0528528667605156	0.128179789687982	Fem.Oenocytes vs Female total carcass cells	Female Oenocytes	1594.88	Female total carcass cells	930.078	cytochrome b5 protein	FALSE	FALSE	FALSE
Anogam_AGAP012129	-0.309764	0.304551863063312	-1.01711522730742	0.309098617238266	0.461370831740618	Fem.Oenocytes vs Female total carcass cells	Female Oenocytes	1594.36	Female total carcass cells	2111.43	dimethyladenosine transferase 12C mitochondrial	FALSE	FALSE	FALSE
Anogam_AGAP010318	1.09181	0.309528965434247	3.52731198608638	0.000419801788105882	0.0027820025232509	Fem.Oenocytes vs Female total carcass cells	Female Oenocytes	1592.77	Female total carcass cells	798.581	guanine nucleotide-binding protein subunit beta-5	FALSE	FALSE	FALSE
Anogam_AGAP009566	0.743862	0.331037420029935	2.24706217740943	0.0246360536951065	0.0720827708017347	Fem.Oenocytes vs Female total carcass cells	Female Oenocytes	1592.56	Female total carcass cells	1015.77	zinc finger protein 271	FALSE	FALSE	FALSE
Anogam_AGAP010429	-0.495484	0.368200368638502	-1.3456903129601	0.178402411748224	0.313321915037389	Fem.Oenocytes vs Female total carcass cells	Female Oenocytes	1590.66	Female total carcass cells	2399.09	succinate dehydrogenase (ubiquinone) flavoprotein subunit	FALSE	FALSE	FALSE
Anogam_AGAP000534	1.11988	0.295788404192953	3.78607876033516	0.000153043185254829	0.00119628561614012	Fem.Oenocytes vs Female total carcass cells	Female Oenocytes	1589.99	Female total carcass cells	782.33	glutathione synthase	FALSE	FALSE	FALSE
Anogam_AGAP008027	0.286935	0.271423424267641	1.05714743733351	0.290444304308526	0.441796903588011	Fem.Oenocytes vs Female total carcass cells	Female Oenocytes	1589.94	Female total carcass cells	1393.27	Slowmo	FALSE	FALSE	FALSE
Anogam_AGAP012885	-0.243777	0.429794293270005	-0.567193740009332	0.570582560650131	0.699772355336467	Fem.Oenocytes vs Female total carcass cells	Female Oenocytes	1588.54	Female total carcass cells	2013.43	Histone H4	FALSE	FALSE	FALSE
Anogam_AGAP006819	1.61582	0.38572141341502	4.18909331092873	2.80071227563226e-05	0.000288298672075143	Fem.Oenocytes vs Female total carcass cells	Female Oenocytes	1588.41	Female total carcass cells	554.508	abhydrolase domain-containing protein 1-3	TRUE	FALSE	TRUE
Anogam_AGAP003722	1.29949	0.375041983792483	3.46490606509653	0.000530416712664614	0.00336259219577716	Fem.Oenocytes vs Female total carcass cells	Female Oenocytes	1588.03	Female total carcass cells	690.99	ANXB10C annexin B10C	FALSE	FALSE	FALSE
Anogam_AGAP008433	0.484685	0.304101130099005	1.59382916838346	0.11097430256615	0.221587083158319	Fem.Oenocytes vs Female total carcass cells	Female Oenocytes	1587.86	Female total carcass cells	1212.7	RNA-binding protein 39	FALSE	FALSE	FALSE
Anogam_AGAP003914	1.63792	0.348580789315545	4.69883213040898	2.6165340627669e-06	3.81372885046024e-05	Fem.Oenocytes vs Female total carcass cells	Female Oenocytes	1587.24	Female total carcass cells	544.804		TRUE	FALSE	TRUE
Anogam_AGAP009158	2.54042	0.426944402661468	5.95024341427121	2.67743999727279e-09	9.57886924898432e-08	Fem.Oenocytes vs Female total carcass cells	Female Oenocytes	1586.84	Female total carcass cells	292.333	Guanylate cyclase	TRUE	FALSE	TRUE
Anogam_AGAP010792	-0.999158	0.341320370590742	-2.9273307450346	0.00341885090257222	0.0152094271457039	Fem.Oenocytes vs Female total carcass cells	Female Oenocytes	1585.44	Female total carcass cells	3391.08	NADH dehydrogenase (ubiquinone) 1 alpha subcomplex 9	FALSE	FALSE	FALSE
Anogam_AGAP007543	0.966469	0.286025907117895	3.37895681730558	0.000727614362037837	0.00438712442685395	Fem.Oenocytes vs Female total carcass cells	Female Oenocytes	1585.33	Female total carcass cells	867.805	TPX3 thioredoxin peroxidase 3	FALSE	FALSE	FALSE
Anogam_AGAP011479	3.71877	0.628003982297379	5.92157595447839	3.18870969850583e-09	1.11354531177856e-07	Fem.Oenocytes vs Female total carcass cells	Female Oenocytes	1584.73	Female total carcass cells	129.292	hyaluronoglucosaminidase	TRUE	FALSE	TRUE
Anogam_AGAP008929	-0.184329	0.283015358208277	-0.651303000818192	0.514850911676283	0.654420336783172	Fem.Oenocytes vs Female total carcass cells	Female Oenocytes	1583.77	Female total carcass cells	1925.35	threonyl-tRNA synthetase	FALSE	FALSE	FALSE
Anogam_AGAP005901	2.17087	0.354680405700738	6.1206481041457	9.31955144187331e-10	3.7705395572097e-08	Fem.Oenocytes vs Female total carcass cells	Female Oenocytes	1583.08	Female total carcass cells	376.369	sterile alpha and TIR motif-containing protein 1	TRUE	FALSE	TRUE
Anogam_AGAP009100	2.94769	0.984410875094519	2.9943731168485	NA	NA	Fem.Oenocytes vs Female total carcass cells	Female Oenocytes	1577.59	Female total carcass cells	218.474	Protein-glutamine gamma-glutamyltransferase E	FALSE	FALSE	FALSE
Anogam_AGAP009182	-0.0954846	0.247342120195594	-0.386042492161066	0.699465199203239	0.799299521805623	Fem.Oenocytes vs Female total carcass cells	Female Oenocytes	1576.02	Female total carcass cells	1800.97	protein transport protein SEC61 subunit alpha	FALSE	FALSE	FALSE
Anogam_AGAP001056	0.341965	0.324448047438254	1.05399053414628	0.291887250941901	0.443238997208004	Fem.Oenocytes vs Female total carcass cells	Female Oenocytes	1576.01	Female total carcass cells	1331.52	ubiquitin-conjugating enzyme E2 L3	FALSE	FALSE	FALSE
Anogam_AGAP010767	1.41924	0.439963663235182	3.22582083044737	0.0012561196414484	0.00680032601656084	Fem.Oenocytes vs Female total carcass cells	Female Oenocytes	1572.52	Female total carcass cells	627.986		FALSE	FALSE	FALSE
Anogam_AGAP012464	1.8989	0.393094458316302	4.83064020929869	1.36094737414996e-06	2.13576894667215e-05	Fem.Oenocytes vs Female total carcass cells	Female Oenocytes	1572.39	Female total carcass cells	451.845	natural resistance-associated macrophage protein	TRUE	FALSE	TRUE
Anogam_AGAP002155	0.36221	0.335731054305762	1.07887049198576	0.280645464801193	0.43109546995385	Fem.Oenocytes vs Female total carcass cells	Female Oenocytes	1568.6	Female total carcass cells	1304.46	hepatocyte nuclear factor 4	FALSE	FALSE	FALSE
Anogam_AGAP005088	1.82655	0.291861234209277	6.2582707118779	3.89269680786776e-10	1.7584495457249e-08	Fem.Oenocytes vs Female total carcass cells	Female Oenocytes	1567.23	Female total carcass cells	471.842		TRUE	FALSE	TRUE
Anogam_AGAP009094	0.546068	0.456403813357517	1.19645800131692	0.231517878659012	0.377563427923292	Fem.Oenocytes vs Female total carcass cells	Female Oenocytes	1567	Female total carcass cells	1147.21	cysteine desulfurase	FALSE	FALSE	FALSE
Anogam_AGAP000040	2.31574	0.66462167390381	3.48429683339487	0.000493431918159051	0.00317922043014723	Fem.Oenocytes vs Female total carcass cells	Female Oenocytes	1566.54	Female total carcass cells	336.042		FALSE	FALSE	FALSE
Anogam_AGAP009189	1.09538	0.344148814871105	3.18285625543809	0.00145829992159878	0.00768348341802198	Fem.Oenocytes vs Female total carcass cells	Female Oenocytes	1558.65	Female total carcass cells	778.863		FALSE	FALSE	FALSE
Anogam_AGAP006244	1.21748	0.313798264203543	3.87982389357887	0.000104532120600519	0.000873120537130212	Fem.Oenocytes vs Female total carcass cells	Female Oenocytes	1558.57	Female total carcass cells	716.801	CTL-like protein 1	TRUE	FALSE	TRUE
Anogam_AGAP010861	0.409435	0.413063131827077	0.991217511088105	0.321579381745652	0.4743261112904	Fem.Oenocytes vs Female total carcass cells	Female Oenocytes	1557.89	Female total carcass cells	1252.19	solute carrier family 6 (neurotransmitter transporter2C serotonin)	FALSE	FALSE	FALSE
Anogam_AGAP012421	1.36976	0.307074051333835	4.46069184066912	8.16954910218841e-06	0.000101692002936243	Fem.Oenocytes vs Female total carcass cells	Female Oenocytes	1555.38	Female total carcass cells	644.137		TRUE	FALSE	TRUE
Anogam_AGAP002645	0.945324	0.486084180556192	1.94477418518081	0.0518021623766907	0.12635035171354	Fem.Oenocytes vs Female total carcass cells	Female Oenocytes	1553.44	Female total carcass cells	861.453	septin 2	FALSE	FALSE	FALSE
Anogam_AGAP009849	3.01362	0.885484766910393	3.40335685280257	NA	NA	Fem.Oenocytes vs Female total carcass cells	Female Oenocytes	1552.41	Female total carcass cells	205.258	SP14D1	FALSE	FALSE	FALSE
Anogam_AGAP001420	-1.56368	0.431505490629813	-3.62378640934427	0.000290321384266953	0.0020479463692035	Fem.Oenocytes vs Female total carcass cells	Female Oenocytes	1551.52	Female total carcass cells	4910.01	22C3-bisphosphoglycerate-dependent phosphoglycerate mutase	FALSE	FALSE	FALSE
Anogam_AGAP009181	0.34847	0.287425094312364	1.21238629617185	0.225364544139856	0.370181905429298	Fem.Oenocytes vs Female total carcass cells	Female Oenocytes	1547.99	Female total carcass cells	1300.83		FALSE	FALSE	FALSE
Anogam_AGAP011733	0.804873	0.413841049270651	1.94488469968411	0.0517888569146238	0.126348017155563	Fem.Oenocytes vs Female total carcass cells	Female Oenocytes	1544.85	Female total carcass cells	946.888		FALSE	FALSE	FALSE
Anogam_AGAP010464	-0.459908	0.29947945341941	-1.53569206067006	0.12461392318675	0.241894507312436	Fem.Oenocytes vs Female total carcass cells	Female Oenocytes	1544.69	Female total carcass cells	2273.73	NADH dehydrogenase (ubiquinone) 1 alpha-beta subcomplex 1	FALSE	FALSE	FALSE
Anogam_AGAP007361	0.0754582	0.218158980697838	0.345886100126266	0.729428315150829	0.821429729322395	Fem.Oenocytes vs Female total carcass cells	Female Oenocytes	1542.82	Female total carcass cells	1565.43	translocation protein SEC63	FALSE	FALSE	FALSE
Anogam_AGAP005845	-0.278143	0.292622276334312	-0.950520128108142	0.341848031400178	0.494916091404893	Fem.Oenocytes vs Female total carcass cells	Female Oenocytes	1541	Female total carcass cells	1999.86	V-type H+-transporting ATPase subunit C	FALSE	FALSE	FALSE
Anogam_AGAP011076	0.583641	0.266015810252921	2.19400968109149	0.0282347135800496	0.0799827213042822	Fem.Oenocytes vs Female total carcass cells	Female Oenocytes	1537.12	Female total carcass cells	1097.24	ubiquitin-conjugating enzyme E2 I	FALSE	FALSE	FALSE
Anogam_AGAP011569	2.10312	0.625361803456114	3.36304159964907	0.00077088746245822	0.00458055779086673	Fem.Oenocytes vs Female total carcass cells	Female Oenocytes	1536.89	Female total carcass cells	382.224	secretory phospholipase A2	FALSE	FALSE	FALSE
Anogam_AGAP006097	0.514832	0.352513209235842	1.46046242852793	0.144163026173065	0.268733117836182	Fem.Oenocytes vs Female total carcass cells	Female Oenocytes	1536.89	Female total carcass cells	1150.06	target of Myb-like protein 2	FALSE	FALSE	FALSE
Anogam_AGAP028439	4.33904	0.758182653089741	5.72294402664653	1.04693765775032e-08	3.16930950121339e-07	Fem.Oenocytes vs Female total carcass cells	Female Oenocytes	1536.82	Female total carcass cells	81.289		TRUE	FALSE	TRUE
Anogam_AGAP004790	-0.826693	0.380273218291785	-2.1739459269449	0.0297091963477486	0.0827844490822887	Fem.Oenocytes vs Female total carcass cells	Female Oenocytes	1536.78	Female total carcass cells	2916.63	Up-regulated during skeletal muscle growth 5 homolog	FALSE	FALSE	FALSE
Anogam_AGAP001372	2.26879	0.493941889533456	4.59322447660139	4.36449141186955e-06	5.93849416572463e-05	Fem.Oenocytes vs Female total carcass cells	Female Oenocytes	1536.35	Female total carcass cells	340.348		TRUE	FALSE	TRUE
Anogam_AGAP010389	0.406698	0.470106213906047	0.865119245375588	0.3869733426203	0.539527666401862	Fem.Oenocytes vs Female total carcass cells	Female Oenocytes	1536.11	Female total carcass cells	1237.12	Prestin	FALSE	FALSE	FALSE
Anogam_AGAP012291	1.61797	0.251992824592922	6.42068071829818	1.35666306387969e-10	7.04638399472942e-09	Fem.Oenocytes vs Female total carcass cells	Female Oenocytes	1535.87	Female total carcass cells	534.88	CYP9J3 cytochrome P450	TRUE	FALSE	TRUE
Anogam_AGAP009824	0.0456322	0.313323119781889	0.145639541345113	0.88420595129377	0.929507527460037	Fem.Oenocytes vs Female total carcass cells	Female Oenocytes	1534.27	Female total carcass cells	1590.52	NADH dehydrogenase (ubiquinone) Fe-S protein 5	FALSE	FALSE	FALSE
Anogam_AGAP013457	0.772828	0.348730141423947	2.21611941167541	0.0266833251435388	0.076616669956047	Fem.Oenocytes vs Female total carcass cells	Female Oenocytes	1531.46	Female total carcass cells	957.643	CDC-like kinase 2	FALSE	FALSE	FALSE
Anogam_AGAP004882	0.684486	0.2495972832771	2.74236272182969	0.0060998941226516	0.0242102857497949	Fem.Oenocytes vs Female total carcass cells	Female Oenocytes	1531.12	Female total carcass cells	1018.67	transmembrane 9 superfamily member 3	FALSE	FALSE	FALSE
Anogam_AGAP000308	-0.881141	0.25800927541405	-3.41515413073223	0.000637459291773286	0.00392684134462629	Fem.Oenocytes vs Female total carcass cells	Female Oenocytes	1528.81	Female total carcass cells	3007.36	proteasome activator subunit 3 (PA28 gamma)	FALSE	FALSE	FALSE
Anogam_AGAP008288	1.24899	0.360092745220336	3.46851791549765	0.000523337631494812	0.0033300936849844	Fem.Oenocytes vs Female total carcass cells	Female Oenocytes	1528.7	Female total carcass cells	688.116	TIM timeless	FALSE	FALSE	FALSE
Anogam_AGAP000163	3.15593	0.648075964419417	4.86969452204218	1.11770905414948e-06	1.82108265000915e-05	Fem.Oenocytes vs Female total carcass cells	Female Oenocytes	1527.89	Female total carcass cells	183.998	GSTMS2 glutathione transferase microsomal 2	TRUE	FALSE	TRUE
Anogam_AGAP004616	-0.945809	0.339638181306702	-2.78475423829408	0.0053568307550881	0.02182839198967	Fem.Oenocytes vs Female total carcass cells	Female Oenocytes	1527.74	Female total carcass cells	3149.34	F-type H+-transporting ATPase subunit 6	FALSE	FALSE	FALSE
Anogam_AGAP008167	1.81893	0.372343130224914	4.88510181013767	1.03375423270679e-06	1.69781273018553e-05	Fem.Oenocytes vs Female total carcass cells	Female Oenocytes	1527.68	Female total carcass cells	462.443	abhydrolase domain containing 4	TRUE	FALSE	TRUE
Anogam_AGAP011580	-0.744595	0.247886048480325	-3.00377821076106	0.00266649630475715	0.0124639516629855	Fem.Oenocytes vs Female total carcass cells	Female Oenocytes	1525.31	Female total carcass cells	2731.49	eIF3k Eukaryotic translation initiation factor 3 subunit K	FALSE	FALSE	FALSE
Anogam_AGAP010805	0.901972	0.546126077025082	1.65158259454151	0.0986196706316541	0.202707205685634	Fem.Oenocytes vs Female total carcass cells	Female Oenocytes	1524.59	Female total carcass cells	871.428		FALSE	FALSE	FALSE
Anogam_AGAP005865	-1.36486	0.33845212995928	-4.03265653680414	5.51498549710503e-05	0.000503833317914096	Fem.Oenocytes vs Female total carcass cells	Female Oenocytes	1524.42	Female total carcass cells	4190.99	fumarylacetoacetase	FALSE	TRUE	TRUE
Anogam_AGAP001884	-0.838877	0.275234426717123	-3.04786455094368	0.00230473785842861	0.0110870135248903	Fem.Oenocytes vs Female total carcass cells	Female Oenocytes	1523.98	Female total carcass cells	2915.92	fumarate hydratase2C class II	FALSE	FALSE	FALSE
Anogam_AGAP007332	2.6671	0.414550562299034	6.43370636473289	1.24529324918266e-10	6.53427719263436e-09	Fem.Oenocytes vs Female total carcass cells	Female Oenocytes	1523.68	Female total carcass cells	256.762	Rab GTPase-activating protein 1 isoform a	TRUE	FALSE	TRUE
Anogam_AGAP001394	1.45012	0.321599068993236	4.50910803996981	6.51007514810249e-06	8.38930590873862e-05	Fem.Oenocytes vs Female total carcass cells	Female Oenocytes	1523.46	Female total carcass cells	597.223	synaptosomal-associated protein2C 23kDa	TRUE	FALSE	TRUE
Anogam_AGAP009842	0.203066	0.34198532092372	0.59378601245652	0.552655245649699	0.686660362791693	Fem.Oenocytes vs Female total carcass cells	Female Oenocytes	1521.9	Female total carcass cells	1414.15	ribonuclease T2	FALSE	FALSE	FALSE
Anogam_AGAP009659	0.0851789	0.260084383030841	0.327504919458289	0.743286022758012	0.831453217979663	Fem.Oenocytes vs Female total carcass cells	Female Oenocytes	1521.83	Female total carcass cells	1533.26		FALSE	FALSE	FALSE
Anogam_AGAP012194	0.720078	0.277496558561504	2.59490905914349	0.00946159498345659	0.0340165284155755	Fem.Oenocytes vs Female total carcass cells	Female Oenocytes	1515.04	Female total carcass cells	983.491	DnaJ (Hsp40) homolog2C subfamily B	FALSE	FALSE	FALSE
Anogam_AGAP010139	-0.697632	0.261488654602462	-2.66792496772574	0.00763213004241802	0.0287737489292635	Fem.Oenocytes vs Female total carcass cells	Female Oenocytes	1512.11	Female total carcass cells	2621.45	GMP synthase (glutamine-hydrolysing)	FALSE	FALSE	FALSE
Anogam_AGAP002065	2.36538	0.486150585512405	4.86552114779547	1.14155603302528e-06	1.85697954370663e-05	Fem.Oenocytes vs Female total carcass cells	Female Oenocytes	1508.5	Female total carcass cells	312.576	alpha-tocopherol transfer protein	TRUE	FALSE	TRUE
Anogam_AGAP003043	0.161804	0.433890093688705	0.372914734528829	0.709211905219143	0.805668503852812	Fem.Oenocytes vs Female total carcass cells	Female Oenocytes	1507.02	Female total carcass cells	1438.46		FALSE	FALSE	FALSE
Anogam_AGAP004349	-0.0155696	0.274446059942019	-0.056731072418321	0.954759421656372	0.973405580150259	Fem.Oenocytes vs Female total carcass cells	Female Oenocytes	1502.86	Female total carcass cells	1625.24		FALSE	FALSE	FALSE
Anogam_AGAP010233	2.42779	0.981660618825331	2.47315103424378	0.0133927529393773	0.0448715524257359	Fem.Oenocytes vs Female total carcass cells	Female Oenocytes	1499.91	Female total carcass cells	297.383	integrin beta 1	FALSE	FALSE	FALSE
Anogam_AGAP028602	2.87593	0.957041483025226	3.0050194059095	0.00265563905446397	0.0124245536375287	Fem.Oenocytes vs Female total carcass cells	Female Oenocytes	1498.09	Female total carcass cells	218.091		FALSE	FALSE	FALSE
Anogam_AGAP007474	1.91043	0.411919479902388	4.63788309340663	3.51995777342291e-06	4.94049491600318e-05	Fem.Oenocytes vs Female total carcass cells	Female Oenocytes	1495.08	Female total carcass cells	424.594	Talin-1	TRUE	FALSE	TRUE
Anogam_AGAP012746	1.14681	0.624639279801338	1.8359604863082	0.0663635008200553	0.151840639622273	Fem.Oenocytes vs Female total carcass cells	Female Oenocytes	1493.64	Female total carcass cells	721.566	Phyhd1 protein	FALSE	FALSE	FALSE
Anogam_AGAP006607	-0.558691	0.257713553103968	-2.16787747118272	0.0301680103887962	0.0837891102872319	Fem.Oenocytes vs Female total carcass cells	Female Oenocytes	1493.44	Female total carcass cells	2350.99	eIF3i Eukaryotic translation initiation factor 3 subunit I	FALSE	FALSE	FALSE
Anogam_AGAP007605	1.98771	0.316035802273716	6.28952097635118	3.18447077952946e-10	1.50154400996062e-08	Fem.Oenocytes vs Female total carcass cells	Female Oenocytes	1489.14	Female total carcass cells	400.939		TRUE	FALSE	TRUE
Anogam_AGAP000327	-2.51346	0.625537890303219	-4.0180824390508	5.86736711541321e-05	0.000532546042134691	Fem.Oenocytes vs Female total carcass cells	Female Oenocytes	1487.85	Female total carcass cells	9048.21	tyrosine aminotransferase	FALSE	TRUE	TRUE
Anogam_AGAP005889	-2.40366	0.675364696916536	-3.55906034296695	0.000372184019452023	0.0025286765518148	Fem.Oenocytes vs Female total carcass cells	Female Oenocytes	1487.65	Female total carcass cells	8388		FALSE	FALSE	FALSE
Anogam_AGAP001751	-0.0158954	0.253245696554088	-0.062766699718812	0.94995228333683	0.970553483192324	Fem.Oenocytes vs Female total carcass cells	Female Oenocytes	1485.87	Female total carcass cells	1605.67	Oxidation resistance protein	FALSE	FALSE	FALSE
Anogam_AGAP009037	1.93352	0.41779355869921	4.6279196866769	3.69357191430867e-06	5.14185412615052e-05	Fem.Oenocytes vs Female total carcass cells	Female Oenocytes	1484.35	Female total carcass cells	416.041		TRUE	FALSE	TRUE
Anogam_AGAP006386	1.92715	0.316472175041421	6.08948353248787	1.13275515273889e-09	4.44074740338097e-08	Fem.Oenocytes vs Female total carcass cells	Female Oenocytes	1483.67	Female total carcass cells	417.749	transcription factor AP-1	TRUE	FALSE	TRUE
Anogam_AGAP003869	0.193765	0.268620890463591	0.72133202608972	0.470705257131074	0.615653354335313	Fem.Oenocytes vs Female total carcass cells	Female Oenocytes	1482.47	Female total carcass cells	1387.09	cytosol aminopeptidase	FALSE	FALSE	FALSE
Anogam_AGAP010589	1.02919	0.276550291918213	3.72152755142834	0.000198021255193544	0.00148110634732481	Fem.Oenocytes vs Female total carcass cells	Female Oenocytes	1481.48	Female total carcass cells	777.019	guanine nucleotide-binding protein subunit gamma	FALSE	FALSE	FALSE
Anogam_AGAP009104	1.53875	0.328919990954292	4.67819346460446	2.89413420305545e-06	4.16494812456588e-05	Fem.Oenocytes vs Female total carcass cells	Female Oenocytes	1480.63	Female total carcass cells	545.752		TRUE	FALSE	TRUE
Anogam_AGAP006670	1.07925	0.838027066137225	1.28784679060989	0.197799300746833	0.336584474512156	Fem.Oenocytes vs Female total carcass cells	Female Oenocytes	1479.88	Female total carcass cells	747.501	gamma-glutamyl hydrolase	FALSE	FALSE	FALSE
Anogam_AGAP002101	-0.41289	0.330687930567284	-1.24858030420225	0.211818619879369	0.353885654679352	Fem.Oenocytes vs Female total carcass cells	Female Oenocytes	1478.64	Female total carcass cells	2103.2	isoleucyl-tRNA synthetase	FALSE	FALSE	FALSE
Anogam_AGAP003178	1.43309	0.3942246147561	3.63522180863085	0.000277741564054114	0.00198176546959672	Fem.Oenocytes vs Female total carcass cells	Female Oenocytes	1477.31	Female total carcass cells	585.91	GRX2 glutaredoxin	FALSE	FALSE	FALSE
Anogam_AGAP000268	3.95349	0.67609129848111	5.84757472068021	4.98791803005339e-09	1.6516626952591e-07	Fem.Oenocytes vs Female total carcass cells	Female Oenocytes	1475.67	Female total carcass cells	102.161		TRUE	FALSE	TRUE
Anogam_AGAP007391	0.535536	0.32436570501032	1.65102577897966	0.0987333111329697	0.20277784815587	Fem.Oenocytes vs Female total carcass cells	Female Oenocytes	1475.64	Female total carcass cells	1089.74	Coenzyme Q10 homolog B (S. cerevisiae)	FALSE	FALSE	FALSE
Anogam_AGAP009642	-0.888381	0.278261195117985	-3.19261421723171	0.00140991172793315	0.00747085282248162	Fem.Oenocytes vs Female total carcass cells	Female Oenocytes	1475.34	Female total carcass cells	2919.21	prohibitin 2	FALSE	FALSE	FALSE
Anogam_AGAP003168	-2.86589	0.392266032483627	-7.30599322863761	2.75226034022593e-13	3.52014097514897e-11	Fem.Oenocytes vs Female total carcass cells	Female Oenocytes	1475.28	Female total carcass cells	11488.6	Isocitrate dehydrogenase [NADP]	FALSE	TRUE	TRUE
Anogam_AGAP007967	0.705781	0.268991798364993	2.62380072456743	0.00869546440526064	0.0318553497295478	Fem.Oenocytes vs Female total carcass cells	Female Oenocytes	1475.11	Female total carcass cells	966.559	selenide2C water dikinase	FALSE	FALSE	FALSE
Anogam_AGAP001011	1.63207	0.593950549219431	2.74781415814817	0.00599940033955024	0.0239188977212808	Fem.Oenocytes vs Female total carcass cells	Female Oenocytes	1473.91	Female total carcass cells	508.457		FALSE	FALSE	FALSE
Anogam_AGAP009694	-0.417176	0.219007610702608	-1.90484823047264	0.056799802356421	0.135535349279594	Fem.Oenocytes vs Female total carcass cells	Female Oenocytes	1472.93	Female total carcass cells	2103.47	T-complex protein 1 subunit beta	FALSE	FALSE	FALSE
Anogam_AGAP006686	0.732789	0.330069460056699	2.22010610235734	0.0264115660727438	0.076146278967685	Fem.Oenocytes vs Female total carcass cells	Female Oenocytes	1471.48	Female total carcass cells	945.711	spectrin alpha	FALSE	FALSE	FALSE
Anogam_AGAP006115	2.6159	0.365139374018621	7.16410324950624	7.82973776166132e-13	8.43303966077039e-11	Fem.Oenocytes vs Female total carcass cells	Female Oenocytes	1470.95	Female total carcass cells	257.313	solute carrier family 42C anion exchanger	TRUE	FALSE	TRUE
Anogam_AGAP001866	1.15379	0.456245897308345	2.52886694317847	0.0114431399358497	0.0395962826593218	Fem.Oenocytes vs Female total carcass cells	Female Oenocytes	1470.53	Female total carcass cells	706.068		FALSE	FALSE	FALSE
Anogam_AGAP005122	0.399342	0.265111093594877	1.50631952930907	0.131985167124543	0.252177151646003	Fem.Oenocytes vs Female total carcass cells	Female Oenocytes	1468.46	Female total carcass cells	1191.38	UBX domain-containing protein 1	FALSE	FALSE	FALSE
Anogam_AGAP004310	0.155957	0.295913920316074	0.527036351977288	0.598168344610556	0.722177994342798	Fem.Oenocytes vs Female total carcass cells	Female Oenocytes	1465.05	Female total carcass cells	1406.17		FALSE	FALSE	FALSE
Anogam_AGAP002170	-0.883372	0.280110782647609	-3.15365147161767	0.00161241526943636	0.00831564165164961	Fem.Oenocytes vs Female total carcass cells	Female Oenocytes	1464.23	Female total carcass cells	2888.83	NADH dehydrogenase (ubiquinone) flavoprotein 2	FALSE	FALSE	FALSE
Anogam_AGAP012168	1.03577	0.272803874210868	3.7967680454198	0.000146594838782468	0.00115381414647862	Fem.Oenocytes vs Female total carcass cells	Female Oenocytes	1461.4	Female total carcass cells	762.694	Rho GDP-dissociation inhibitor	FALSE	FALSE	FALSE
Anogam_AGAP010480	0.847531	0.322097342549045	2.6312873254	0.00850620874896895	0.031285236491535	Fem.Oenocytes vs Female total carcass cells	Female Oenocytes	1461.11	Female total carcass cells	868.552	Kinase	FALSE	FALSE	FALSE
Anogam_AGAP001407	0.518605	0.37337701838247	1.38895799165677	0.164845524478836	0.295704664527955	Fem.Oenocytes vs Female total carcass cells	Female Oenocytes	1458.52	Female total carcass cells	1089.81	26S proteasome regulatory subunit T4	FALSE	FALSE	FALSE
Anogam_AGAP013128	2.83733	0.361771791188717	7.84288007682125	4.40328471122711e-15	9.19477738066853e-13	Fem.Oenocytes vs Female total carcass cells	Female Oenocytes	1458.22	Female total carcass cells	217.621	CYP6AA2 cytochrome P450	TRUE	FALSE	TRUE
Anogam_AGAP000985	1.85378	0.43210224335481	4.29014165533314	1.78559187364276e-05	0.000197740167382546	Fem.Oenocytes vs Female total carcass cells	Female Oenocytes	1457.55	Female total carcass cells	430.866	ARP2 actin-related protein 2 homolog	TRUE	FALSE	TRUE
Anogam_AGAP009823	0.219238	0.266683247445387	0.822091524874262	0.411024808633375	0.56243451991669	Fem.Oenocytes vs Female total carcass cells	Female Oenocytes	1454.46	Female total carcass cells	1336.86		FALSE	FALSE	FALSE
Anogam_AGAP004298	-0.0859637	0.229304987240544	-0.374888255029597	0.70774357426857	0.804804651246501	Fem.Oenocytes vs Female total carcass cells	Female Oenocytes	1453.4	Female total carcass cells	1648.33	calcineurin beta subunit	FALSE	FALSE	FALSE
Anogam_AGAP003649	0.236017	0.325704022530467	0.724636312919176	0.468675175427676	0.61371403541508	Fem.Oenocytes vs Female total carcass cells	Female Oenocytes	1453.12	Female total carcass cells	1319.9		FALSE	FALSE	FALSE
Anogam_AGAP004703	-0.184854	0.329453132394093	-0.561092350558741	0.574734582573916	0.702674662312857	Fem.Oenocytes vs Female total carcass cells	Female Oenocytes	1452.02	Female total carcass cells	1766.63	DNA-directed RNA polymerase III subunit RPC1	FALSE	FALSE	FALSE
Anogam_AGAP009921	-0.264606	0.247689991234696	-1.06829358502851	0.285388101266802	0.436290311095461	Fem.Oenocytes vs Female total carcass cells	Female Oenocytes	1451.27	Female total carcass cells	1863.21	importin subunit beta-1	FALSE	FALSE	FALSE
Anogam_AGAP011629	-0.903964	0.3241974158571	-2.78831335283066	0.0052983268217722	0.0216548884864665	Fem.Oenocytes vs Female total carcass cells	Female Oenocytes	1450.35	Female total carcass cells	2904.05	dihydrolipoamide dehydrogenase	FALSE	FALSE	FALSE
Anogam_AGAP000109	-0.626386	0.326055042042536	-1.92110645912884	0.0547182874766901	0.131488378924728	Fem.Oenocytes vs Female total carcass cells	Female Oenocytes	1448.07	Female total carcass cells	2392.46	cytochrome c oxidase subunit VIIa	FALSE	FALSE	FALSE
Anogam_AGAP005380	1.54087	0.366657190529519	4.20248356765893	2.64002418237105e-05	0.000273685181702336	Fem.Oenocytes vs Female total carcass cells	Female Oenocytes	1447.6	Female total carcass cells	532.567		TRUE	FALSE	TRUE
Anogam_AGAP003496	3.94785	0.824255422619312	4.78959420429745	1.67118928106005e-06	2.54703546295811e-05	Fem.Oenocytes vs Female total carcass cells	Female Oenocytes	1447.5	Female total carcass cells	100.329		TRUE	FALSE	TRUE
Anogam_AGAP009204	-0.353383	0.219400436313577	-1.61067790308166	0.107249944335224	0.215934952860688	Fem.Oenocytes vs Female total carcass cells	Female Oenocytes	1446.28	Female total carcass cells	1976.01	eIF3h Eukaryotic translation initiation factor 3 subunit H	FALSE	FALSE	FALSE
Anogam_AGAP012571	-1.66637	0.595008646407645	-2.80058112034005	0.00510106848203727	0.0209952263508469	Fem.Oenocytes vs Female total carcass cells	Female Oenocytes	1445.72	Female total carcass cells	4913.01		FALSE	FALSE	FALSE
Anogam_AGAP001582	1.21574	0.595271822552562	2.04233541309919	0.0411182716088743	0.10640418692514	Fem.Oenocytes vs Female total carcass cells	Female Oenocytes	1445.11	Female total carcass cells	665.135		FALSE	FALSE	FALSE
Anogam_AGAP002564	-2.70238	0.402621672505463	-6.71196136223754	1.92025548513001e-11	1.30987027492335e-09	Fem.Oenocytes vs Female total carcass cells	Female Oenocytes	1439.99	Female total carcass cells	10015.1	Aldo fructose biphosphate aldolase	FALSE	TRUE	TRUE
Anogam_AGAP007460	0.135363	0.663405751900478	0.204042981095007	0.838319911320964	0.898375506141193	Fem.Oenocytes vs Female total carcass cells	Female Oenocytes	1439.92	Female total carcass cells	1404.77	acyl-CoA-binding protein 2	FALSE	FALSE	FALSE
Anogam_AGAP000881	-1.21409	0.358297531992638	-3.3884828286308	0.000702804292336851	0.0042659621145105	Fem.Oenocytes vs Female total carcass cells	Female Oenocytes	1439.79	Female total carcass cells	3576.34	aldehyde dehydrogenase family 7 member A1	FALSE	FALSE	FALSE
Anogam_AGAP006915	1.51653	0.314645155285399	4.81981813816718	1.43689145737917e-06	2.24462189189368e-05	Fem.Oenocytes vs Female total carcass cells	Female Oenocytes	1437.86	Female total carcass cells	538.383		TRUE	FALSE	TRUE
Anogam_AGAP006944	-0.410396	0.227355780399432	-1.80508323355508	0.0710616583223147	0.159482054150211	Fem.Oenocytes vs Female total carcass cells	Female Oenocytes	1430.2	Female total carcass cells	2032.53	eIF3e Eukaryotic translation initiation factor 3 subunit E	FALSE	FALSE	FALSE
Anogam_AGAP009602	-0.526243	0.303550692764165	-1.7336248489331	0.0829846685252263	0.178795356339578	Fem.Oenocytes vs Female total carcass cells	Female Oenocytes	1428.76	Female total carcass cells	2200.91	NADH dehydrogenase (ubiquinone) 1 beta subcomplex 6	FALSE	FALSE	FALSE
Anogam_AGAP028730	1.41644	0.37159895438447	3.81174045465774	0.000137991729481588	0.00109660836270253	Fem.Oenocytes vs Female total carcass cells	Female Oenocytes	1427.41	Female total carcass cells	572.914	ankyrin	FALSE	FALSE	FALSE
Anogam_AGAP000779	2.81738	0.537962059113281	5.23714086595798	1.63083221455238e-07	3.38472113981744e-06	Fem.Oenocytes vs Female total carcass cells	Female Oenocytes	1426.75	Female total carcass cells	216.606	zinc finger homeobox protein 1-2	TRUE	FALSE	TRUE
Anogam_AGAP010672	-0.433177	0.346084231659325	-1.25165167893559	0.210696814728581	0.352493428434082	Fem.Oenocytes vs Female total carcass cells	Female Oenocytes	1425.36	Female total carcass cells	2060.3	succinate dehydrogenase (ubiquinone) cytochrome b560 subunit	FALSE	FALSE	FALSE
Anogam_AGAP000483	2.4597	0.472481865475194	5.20591225138781	1.93045858326629e-07	3.92692887156673e-06	Fem.Oenocytes vs Female total carcass cells	Female Oenocytes	1421.23	Female total carcass cells	275.859	Inositol polyphosphate-5-phosphatase F	TRUE	FALSE	TRUE
Anogam_AGAP004519	-1.3614	0.265746417213283	-5.12291657586031	3.00845476747269e-07	5.76451482786154e-06	Fem.Oenocytes vs Female total carcass cells	Female Oenocytes	1420.61	Female total carcass cells	3904.19	sideroflexin 12C22C3	FALSE	TRUE	TRUE
Anogam_AGAP005873	0.70107	0.371042769748159	1.88945928429787	0.058830313539357	0.138730529646163	Fem.Oenocytes vs Female total carcass cells	Female Oenocytes	1418.33	Female total carcass cells	934.578	DNA-directed RNA polymerases I2C II2C and III subunit RPABC2	FALSE	FALSE	FALSE
Anogam_AGAP001873	2.08934	0.259118086120677	8.06328078771265	7.4273657350713e-16	1.9486360564423e-13	Fem.Oenocytes vs Female total carcass cells	Female Oenocytes	1417.62	Female total carcass cells	356.103		TRUE	FALSE	TRUE
Anogam_AGAP005153	-3.10214	0.557668080610989	-5.56269928199587	2.656334143646e-08	7.0780236869234e-07	Fem.Oenocytes vs Female total carcass cells	Female Oenocytes	1416.86	Female total carcass cells	12973.2	cysteine dioxygenase	FALSE	TRUE	TRUE
Anogam_AGAP008794	1.0162	0.325069177640284	3.12610613606787	0.00177137608479932	0.00896819401269999	Fem.Oenocytes vs Female total carcass cells	Female Oenocytes	1414.92	Female total carcass cells	748.129		FALSE	FALSE	FALSE
Anogam_AGAP029053	0.437583	0.278127706089193	1.57331827035951	0.115645140891903	0.228520873234058	Fem.Oenocytes vs Female total carcass cells	Female Oenocytes	1409.96	Female total carcass cells	1113.52	DOME JAKSTAT pathway signalling Domeless	FALSE	FALSE	FALSE
Anogam_AGAP004489	1.36821	0.582034317218206	2.35073123706986	0.0187365617486225	0.058502441199849	Fem.Oenocytes vs Female total carcass cells	Female Oenocytes	1408.63	Female total carcass cells	584.857		FALSE	FALSE	FALSE
Anogam_AGAP003416	0.025676	0.239600029817305	0.107161761472526	0.914660650618632	0.949747085156266	Fem.Oenocytes vs Female total carcass cells	Female Oenocytes	1407.71	Female total carcass cells	1479.09	prefoldin alpha subunit	FALSE	FALSE	FALSE
Anogam_AGAP004159	0.971811	0.48656878765624	1.9972744011909	0.0457953826039135	0.115527207791727	Fem.Oenocytes vs Female total carcass cells	Female Oenocytes	1407.43	Female total carcass cells	765.943	malate dehydrogenase (oxaloacetate-decarboxylating)(NADP+)	FALSE	FALSE	FALSE
Anogam_AGAP001786	0.625219	0.296721672104453	2.10708770600225	0.0351099777944739	0.0944140059902909	Fem.Oenocytes vs Female total carcass cells	Female Oenocytes	1407.26	Female total carcass cells	975.123	AT-rich interactive domain-containing protein 1	FALSE	FALSE	FALSE
Anogam_AGAP000358	0.676759	0.407943277281806	1.65895470715503	0.097124919464414	0.20019785978241	Fem.Oenocytes vs Female total carcass cells	Female Oenocytes	1407.2	Female total carcass cells	943.224		FALSE	FALSE	FALSE
Anogam_AGAP009276	1.32973	0.356229003951406	3.73279191159968	0.000189369034422422	0.0014278732204939	Fem.Oenocytes vs Female total carcass cells	Female Oenocytes	1406.19	Female total carcass cells	598.875	Piezo-type mechanosensitive ion channel component	FALSE	FALSE	FALSE
Anogam_AGAP006091	2.23928	0.528588297720046	4.23634295620517	2.27189688233262e-05	0.000241141586099869	Fem.Oenocytes vs Female total carcass cells	Female Oenocytes	1405.26	Female total carcass cells	318.468		TRUE	FALSE	TRUE
Anogam_AGAP007867	-0.429874	0.35373291764156	-1.21525131441877	0.224270254434089	0.368987496923878	Fem.Oenocytes vs Female total carcass cells	Female Oenocytes	1403.72	Female total carcass cells	2025.82		FALSE	FALSE	FALSE
Anogam_AGAP009893	-0.485734	0.305555265281347	-1.58967767266084	0.111907478952832	0.222986820768331	Fem.Oenocytes vs Female total carcass cells	Female Oenocytes	1402.62	Female total carcass cells	2099.93	nocturnin	FALSE	FALSE	FALSE
Anogam_AGAP006729	2.19574	0.447913773766015	4.90214139644063	9.47975608034911e-07	1.57462441906059e-05	Fem.Oenocytes vs Female total carcass cells	Female Oenocytes	1402.15	Female total carcass cells	328.158	Ester hydrolase C11orf54	TRUE	FALSE	TRUE
Anogam_AGAP013541	1.21441	0.291032870786526	4.1727619604535	3.00929295189723e-05	0.000305252175077502	Fem.Oenocytes vs Female total carcass cells	Female Oenocytes	1400.49	Female total carcass cells	645.872		TRUE	FALSE	TRUE
Anogam_AGAP006456	-0.657893	0.317707895560681	-2.07074947445468	0.0383822141380983	0.101061969907623	Fem.Oenocytes vs Female total carcass cells	Female Oenocytes	1398.83	Female total carcass cells	2361.55	NADH dehydrogenase (ubiquinone) Fe-S protein 3	FALSE	FALSE	FALSE
Anogam_AGAP004251	-0.988589	0.223925787666958	-4.41480607211165	1.01100580943287e-05	0.000122373214164057	Fem.Oenocytes vs Female total carcass cells	Female Oenocytes	1397.09	Female total carcass cells	2965.21	solute carrier family 20 (sodium-dependent phosphate transporter)	FALSE	FALSE	FALSE
Anogam_AGAP004096	-0.0566918	0.287211646186391	-0.19738668629558	0.843524947468008	0.901404413837353	Fem.Oenocytes vs Female total carcass cells	Female Oenocytes	1397	Female total carcass cells	1552.91	Serine-threonine-protein phosphatase 2A 56 kDa regulatory subunit epsilon	FALSE	FALSE	FALSE
Anogam_AGAP005685	-0.550726	0.31081636745732	-1.77187036337873	0.0764160790331386	0.168295246944454	Fem.Oenocytes vs Female total carcass cells	Female Oenocytes	1396.96	Female total carcass cells	2187.92		FALSE	FALSE	FALSE
Anogam_AGAP011444	0.974052	0.423385190489743	2.30062956831732	0.021412578245752	0.0648604874104158	Fem.Oenocytes vs Female total carcass cells	Female Oenocytes	1396.85	Female total carcass cells	761.135	20S proteasome subunit beta 7	FALSE	FALSE	FALSE
Anogam_AGAP007683	1.2062	0.379685736282211	3.17682578473812	0.00148896450469003	0.00780485902253503	Fem.Oenocytes vs Female total carcass cells	Female Oenocytes	1395.54	Female total carcass cells	648.065	Vacuolar protein sorting-associated protein 35	FALSE	FALSE	FALSE
Anogam_AGAP005744	2.13149	0.270589572291996	7.87719461441107	3.34813214399229e-15	7.28895491432534e-13	Fem.Oenocytes vs Female total carcass cells	Female Oenocytes	1394.65	Female total carcass cells	340.616	LRIM26 leucine-rich immune protein (Coil-less)	TRUE	FALSE	TRUE
Anogam_AGAP007667	0.132849	0.495215669493619	0.268265587051361	0.788494893211886	0.863613760152432	Fem.Oenocytes vs Female total carcass cells	Female Oenocytes	1392.98	Female total carcass cells	1358.68	sugar transporter ERD6-like 4	FALSE	FALSE	FALSE
Anogam_AGAP005462	0.377747	0.328373826395458	1.15035666825636	0.24999699954078	0.397879810126187	Fem.Oenocytes vs Female total carcass cells	Female Oenocytes	1392.49	Female total carcass cells	1146.42		FALSE	FALSE	FALSE
Anogam_AGAP005551	2.15924	0.304927676730651	7.08114259462918	1.42970691965151e-12	1.43419227469355e-10	Fem.Oenocytes vs Female total carcass cells	Female Oenocytes	1391.04	Female total carcass cells	332.89		TRUE	FALSE	TRUE
Anogam_AGAP009670	-0.406043	0.436634772166604	-0.929937008652256	0.352403699914909	0.505863448026003	Fem.Oenocytes vs Female total carcass cells	Female Oenocytes	1390.66	Female total carcass cells	1968.72	SRPN4 serine protease inhibitor (serpin) 4	FALSE	FALSE	FALSE
Anogam_AGAP004234	0.492271	0.368335107081899	1.33647635671871	0.181393623381412	0.31705151254503	Fem.Oenocytes vs Female total carcass cells	Female Oenocytes	1388.48	Female total carcass cells	1055.79	BTB-POZ domain-containing protein	FALSE	FALSE	FALSE
Anogam_AGAP010007	0.733546	0.355907628465721	2.0610571212107	0.0392975909063023	0.102942383551788	Fem.Oenocytes vs Female total carcass cells	Female Oenocytes	1388.39	Female total carcass cells	893.522	coiled-coil domain-containing protein 47	FALSE	FALSE	FALSE
Anogam_AGAP003462	-0.839456	0.237518404604114	-3.53427661174309	0.000408892912106167	0.00272559757437805	Fem.Oenocytes vs Female total carcass cells	Female Oenocytes	1388.26	Female total carcass cells	2655.61	protein arginine N-methyltransferase 1	FALSE	FALSE	FALSE
Anogam_AGAP012038	2.0626	0.454246006230897	4.54070664591069	5.60659962832125e-06	7.38310519909692e-05	Fem.Oenocytes vs Female total carcass cells	Female Oenocytes	1385.28	Female total carcass cells	355.49	glutamate--cysteine ligase regulatory subunit	TRUE	FALSE	TRUE
Anogam_AGAP001886	1.84524	0.51646752098811	3.57281531322601	0.000353163845191526	0.00242521641879174	Fem.Oenocytes vs Female total carcass cells	Female Oenocytes	1383.98	Female total carcass cells	411.523		FALSE	FALSE	FALSE
Anogam_AGAP000852	-0.225686	0.248556573173343	-0.907987853654462	0.36388463903863	0.517264188197174	Fem.Oenocytes vs Female total carcass cells	Female Oenocytes	1382.35	Female total carcass cells	1727.84	Small ubiquitin-related modifier	FALSE	FALSE	FALSE
Anogam_AGAP002346	-0.57442	0.306129235738219	-1.87639706504798	0.0606007773005682	0.142315160279875	Fem.Oenocytes vs Female total carcass cells	Female Oenocytes	1379.66	Female total carcass cells	2196.04	RpS14-2 40S ribosomal protein S14b	FALSE	FALSE	FALSE
Anogam_AGAP012461	-0.00610344	0.223274234416163	-0.0273360485256851	0.978191705037928	0.988431515499514	Fem.Oenocytes vs Female total carcass cells	Female Oenocytes	1379.22	Female total carcass cells	1481.32	transcription factor Dp2C invertebrate	FALSE	FALSE	FALSE
Anogam_AGAP002175	0.409118	0.238820975139616	1.71307326848214	0.0866990611451109	0.184161260875394	Fem.Oenocytes vs Female total carcass cells	Female Oenocytes	1378.66	Female total carcass cells	1110.13	Yip1 interacting factor homolog B	FALSE	FALSE	FALSE
Anogam_AGAP011571	-1.77102	0.411676274251476	-4.30196259136568	1.69291898006686e-05	0.0001895180197379	Fem.Oenocytes vs Female total carcass cells	Female Oenocytes	1378.13	Female total carcass cells	5033.74		FALSE	TRUE	TRUE
Anogam_AGAP004940	0.216255	0.262591310584708	0.823543194700729	0.410199164216739	0.56194374725742	Fem.Oenocytes vs Female total carcass cells	Female Oenocytes	1377.77	Female total carcass cells	1267.17	cAMP-dependent protein kinase regulator	FALSE	FALSE	FALSE
Anogam_AGAP009265	-0.208991	0.283809244389242	-0.73638016452643	0.461499372511077	0.608591516887916	Fem.Oenocytes vs Female total carcass cells	Female Oenocytes	1377.41	Female total carcass cells	1703.34	ectonucleoside triphosphate diphosphohydrolase 5-6	FALSE	FALSE	FALSE
Anogam_AGAP001745	0.683174	0.282809160416908	2.4156722762665	0.0157061906026478	0.0509853243167171	Fem.Oenocytes vs Female total carcass cells	Female Oenocytes	1374.86	Female total carcass cells	915.859	26S proteasome regulatory subunit RPN2	FALSE	FALSE	FALSE
Anogam_AGAP005529	1.26886	0.316096341540309	4.01415881089531	5.96581705145401e-05	0.000539242403449447	Fem.Oenocytes vs Female total carcass cells	Female Oenocytes	1373.94	Female total carcass cells	609.615	Transmembrane BAX inhibitor motif-containing protein 4	TRUE	FALSE	TRUE
Anogam_AGAP003133	1.1687	0.481640606450029	2.42649600220794	0.0152454182891612	0.0497262097337257	Fem.Oenocytes vs Female total carcass cells	Female Oenocytes	1368.96	Female total carcass cells	649.945	E3 ubiquitin-protein ligase NEDD4	FALSE	FALSE	FALSE
Anogam_AGAP006383	0.0601978	0.290319840858092	0.207349915573464	0.835736594100689	0.897306171860367	Fem.Oenocytes vs Female total carcass cells	Female Oenocytes	1367.33	Female total carcass cells	1401.98	oligosaccharyltransferase complex subunit beta	FALSE	FALSE	FALSE
Anogam_AGAP012108	1.15978	0.305148530183689	3.80069163790934	0.000144292774990072	0.00114008005690998	Fem.Oenocytes vs Female total carcass cells	Female Oenocytes	1364.57	Female total carcass cells	652.58	Ras-related protein Ral-A	FALSE	FALSE	FALSE
Anogam_AGAP005782	0.446759	0.308781734245985	1.44684352456117	0.147940753477014	0.273483250149378	Fem.Oenocytes vs Female total carcass cells	Female Oenocytes	1364.19	Female total carcass cells	1071.56	ASNA1 arsenical pump-driving ATPase	FALSE	FALSE	FALSE
Anogam_AGAP004573	-0.202671	0.302653280914777	-0.669647270536682	0.503082672717601	0.643226102293006	Fem.Oenocytes vs Female total carcass cells	Female Oenocytes	1363.7	Female total carcass cells	1678.8	E3 ubiquitin-protein ligase RNF19A	FALSE	FALSE	FALSE
Anogam_AGAP004747	0.599752	0.273576633112485	2.19226408504552	0.0283604434589036	0.0802722150681885	Fem.Oenocytes vs Female total carcass cells	Female Oenocytes	1359.96	Female total carcass cells	959.435	Uncharacterized protein C05D11.1	FALSE	FALSE	FALSE
Anogam_AGAP011754	1.30478	0.459150024844708	2.84172859039084	0.00448696721455184	0.0189635062120175	Fem.Oenocytes vs Female total carcass cells	Female Oenocytes	1359.95	Female total carcass cells	588.313	Cu2+-exporting ATPase	FALSE	FALSE	FALSE
Anogam_AGAP011789	-2.6291	0.455058636425424	-5.77750131483535	7.58181296033684e-09	2.38623025565123e-07	Fem.Oenocytes vs Female total carcass cells	Female Oenocytes	1359.05	Female total carcass cells	8969.58	CLIPA6 CLIP-domain serine protease	FALSE	TRUE	TRUE
Anogam_AGAP012081	-0.997544	0.326059331765471	-3.05939437001691	0.00221784983197224	0.0107370661935221	Fem.Oenocytes vs Female total carcass cells	Female Oenocytes	1358.29	Female total carcass cells	2898.6	F-type H+-transporting ATPase subunit beta	FALSE	FALSE	FALSE
Anogam_AGAP011634	0.389877	0.343859464704314	1.13382550999449	0.256867748126482	0.405861513436975	Fem.Oenocytes vs Female total carcass cells	Female Oenocytes	1357.78	Female total carcass cells	1108.92	Fumarylacetoacetate hydrolase domain containing 2A	FALSE	FALSE	FALSE
Anogam_AGAP003691	-3.16803	0.617093403200978	-5.13379032988245	2.83964433794423e-07	5.49248409562294e-06	Fem.Oenocytes vs Female total carcass cells	Female Oenocytes	1356.92	Female total carcass cells	13001.5		FALSE	TRUE	TRUE
Anogam_AGAP005891	1.62588	0.593520456744133	2.73938721815514	0.00615538295908833	0.024364363031873	Fem.Oenocytes vs Female total carcass cells	Female Oenocytes	1354.9	Female total carcass cells	469.091	coronin homolog	FALSE	FALSE	FALSE
Anogam_AGAP010276	0.463317	0.378501277465516	1.22408202271753	0.220921287009535	0.365062436802577	Fem.Oenocytes vs Female total carcass cells	Female Oenocytes	1354.84	Female total carcass cells	1051.05	pyruvate dehydrogenase kinase	FALSE	FALSE	FALSE
Anogam_AGAP000457	0.284236	0.351073823865863	0.809619284564596	0.418159021029364	0.569038848673022	Fem.Oenocytes vs Female total carcass cells	Female Oenocytes	1354.44	Female total carcass cells	1190.62	protein-L-isoaspartate(D-aspartate) O-methyltransferase	FALSE	FALSE	FALSE
Anogam_AGAP004798	0.377745	0.404874421622259	0.932992022764138	0.350824087143282	0.504122542197967	Fem.Oenocytes vs Female total carcass cells	Female Oenocytes	1352.21	Female total carcass cells	1112.82	Coatomer protein complex2C subunit beta 2	FALSE	FALSE	FALSE
Anogam_AGAP005247	0.885606	0.444055435857925	1.99435971604069	0.046112757565936	0.116070291614922	Fem.Oenocytes vs Female total carcass cells	Female Oenocytes	1351.51	Female total carcass cells	781.556		FALSE	FALSE	FALSE
Anogam_AGAP000900	1.63134	0.658205626440288	2.47845966414837	0.013195102963767	0.0443244561803229	Fem.Oenocytes vs Female total carcass cells	Female Oenocytes	1351.22	Female total carcass cells	465.857	protein-tyrosine sulfotransferase	FALSE	FALSE	FALSE
Anogam_AGAP012374	-0.648936	0.335550329292052	-1.93394410809695	0.053120000185405	0.128614255063195	Fem.Oenocytes vs Female total carcass cells	Female Oenocytes	1351.2	Female total carcass cells	2267.75	NADH dehydrogenase (ubiquinone) 1 beta subcomplex 3	FALSE	FALSE	FALSE
Anogam_AGAP012010	-0.472882	0.301790776390399	-1.56692149879408	0.117133041799418	0.230481785325316	Fem.Oenocytes vs Female total carcass cells	Female Oenocytes	1351.16	Female total carcass cells	2006.4	6-phosphofructo-2-kinase - fructose-22C6-bisphosphatase	FALSE	FALSE	FALSE
Anogam_AGAP006613	0.354484	0.248726311237357	1.42519691516396	0.154100287816604	0.281412483480187	Fem.Oenocytes vs Female total carcass cells	Female Oenocytes	1349.38	Female total carcass cells	1129.37	eIF3j Eukaryotic translation initiation factor 3 subunit J	FALSE	FALSE	FALSE
Anogam_AGAP002736	1.6308	0.492389654046391	3.31201480267948	0.000926266446723454	0.00534247930263494	Fem.Oenocytes vs Female total carcass cells	Female Oenocytes	1348.17	Female total carcass cells	465.231		FALSE	FALSE	FALSE
Anogam_AGAP028138	1.34792	0.660646284931344	2.04030445209324	0.0413200116654392	0.106849315746438	Fem.Oenocytes vs Female total carcass cells	Female Oenocytes	1346.56	Female total carcass cells	564.085		FALSE	FALSE	FALSE
Anogam_AGAP006130	-0.268279	0.260532831703606	-1.02973280731308	0.303135450438613	0.455265673084327	Fem.Oenocytes vs Female total carcass cells	Female Oenocytes	1346.3	Female total carcass cells	1733.82	eIF3l Eukaryotic translation initiation factor 3 subunit L	FALSE	FALSE	FALSE
Anogam_AGAP012463	0.209862	0.222471026935993	0.943323258092024	0.345515582959677	0.498704393404347	Fem.Oenocytes vs Female total carcass cells	Female Oenocytes	1344.91	Female total carcass cells	1243.32	ER degradation enhancer2C mannosidase alpha-like 2	FALSE	FALSE	FALSE
Anogam_AGAP004868	0.864675	0.318376618600107	2.71588633781951	0.00660986063795236	0.0257254066365647	Fem.Oenocytes vs Female total carcass cells	Female Oenocytes	1344.54	Female total carcass cells	789.042		FALSE	FALSE	FALSE
Anogam_AGAP002320	0.522379	0.501098173328584	1.04246919032761	0.297194202474402	0.448442866792226	Fem.Oenocytes vs Female total carcass cells	Female Oenocytes	1342.71	Female total carcass cells	1001.81	isochorismatase domain-containing protein	FALSE	FALSE	FALSE
Anogam_AGAP005467	-0.147313	0.435180789489472	-0.338509198117628	0.734979496708353	0.825342573228034	Fem.Oenocytes vs Female total carcass cells	Female Oenocytes	1342.67	Female total carcass cells	1588.18	vigilin	FALSE	FALSE	FALSE
Anogam_AGAP009095	2.91519	0.678193528971453	4.29845982455361	1.71989067585335e-05	0.000192000969449331	Fem.Oenocytes vs Female total carcass cells	Female Oenocytes	1340.99	Female total carcass cells	189.64		TRUE	FALSE	TRUE
Anogam_AGAP001092	1.16663	0.259007873906398	4.50421452568499	6.66188841010429e-06	8.54191005165252e-05	Fem.Oenocytes vs Female total carcass cells	Female Oenocytes	1338.65	Female total carcass cells	637.526		TRUE	FALSE	TRUE
Anogam_AGAP009040	0.77185	0.316127923218452	2.44157481679732	0.0146233579208426	0.0480495177411885	Fem.Oenocytes vs Female total carcass cells	Female Oenocytes	1338.23	Female total carcass cells	838.148		FALSE	FALSE	FALSE
Anogam_AGAP007843	-0.880099	0.311034997857725	-2.82958042621958	0.00466090836688233	0.0195452518073525	Fem.Oenocytes vs Female total carcass cells	Female Oenocytes	1337.62	Female total carcass cells	2633.62	diacylglycerol O-acyltransferase 1	FALSE	FALSE	FALSE
Anogam_AGAP006204	1.39255	0.336550122746126	4.13771318373976	3.50784477988907e-05	0.000346450461272442	Fem.Oenocytes vs Female total carcass cells	Female Oenocytes	1335.03	Female total carcass cells	544.18		TRUE	FALSE	TRUE
Anogam_AGAP002493	2.08213	0.705977109316189	2.94929521590643	0.00318499573804149	0.0143689931180073	Fem.Oenocytes vs Female total carcass cells	Female Oenocytes	1334.48	Female total carcass cells	335.983		FALSE	FALSE	FALSE
Anogam_AGAP001136	0.718256	0.369843259754345	1.94205424135859	0.0521305342107238	0.126969680086676	Fem.Oenocytes vs Female total carcass cells	Female Oenocytes	1334.11	Female total carcass cells	867.961	tetratricopeptide repeat protein 35	FALSE	FALSE	FALSE
Anogam_AGAP010436	1.93331	0.487434273434946	3.96629918254902	7.29972240046344e-05	0.000641673192453109	Fem.Oenocytes vs Female total carcass cells	Female Oenocytes	1329.3	Female total carcass cells	371.55	adenylate cyclase 2	TRUE	FALSE	TRUE
Anogam_AGAP011329	-0.961634	0.35582120867555	-2.70257657211198	0.00688043344335568	0.0265062481146142	Fem.Oenocytes vs Female total carcass cells	Female Oenocytes	1327.66	Female total carcass cells	2765.46	acetyl-CoA C-acetyltransferase	FALSE	FALSE	FALSE
Anogam_AGAP004619	2.84606	0.481547808636725	5.91024289416412	3.41603644792543e-09	1.17686481263209e-07	Fem.Oenocytes vs Female total carcass cells	Female Oenocytes	1326.4	Female total carcass cells	197.348		TRUE	FALSE	TRUE
Anogam_AGAP011230	4.29218	0.716621461311063	5.98946620786125	2.10530867426389e-09	7.77672142782243e-08	Fem.Oenocytes vs Female total carcass cells	Female Oenocytes	1323.19	Female total carcass cells	72.3982		TRUE	FALSE	TRUE
Anogam_AGAP005369	-0.974013	0.227627640216705	-4.27897476543957	1.87756145706478e-05	0.000205467474103602	Fem.Oenocytes vs Female total carcass cells	Female Oenocytes	1320.73	Female total carcass cells	2772.69		FALSE	FALSE	FALSE
Anogam_AGAP006141	0.845252	0.269149480998826	3.14045532522932	0.00168685433138411	0.00862011091909307	Fem.Oenocytes vs Female total carcass cells	Female Oenocytes	1320.04	Female total carcass cells	785.387	Capping protein (actin filament) muscle Z-line2C alpha 1	FALSE	FALSE	FALSE
Anogam_AGAP012068	0.493098	0.445248738898787	1.10746736426641	0.268091914855319	0.416887001945232	Fem.Oenocytes vs Female total carcass cells	Female Oenocytes	1318.63	Female total carcass cells	1001.03	calpain2C invertebrate	FALSE	FALSE	FALSE
Anogam_AGAP006364	-0.526843	0.321394202542752	-1.63924163234417	0.101162946494096	0.206895716275752	Fem.Oenocytes vs Female total carcass cells	Female Oenocytes	1317.91	Female total carcass cells	2031.8	ABCB4 ATP-binding cassette transporter (ABC transporter) family B member 4	FALSE	FALSE	FALSE
Anogam_AGAP011532	0.828799	0.375887209506524	2.20491371239994	0.0274601500946588	0.0782870592835188	Fem.Oenocytes vs Female total carcass cells	Female Oenocytes	1317.61	Female total carcass cells	792.624	septin	FALSE	FALSE	FALSE
Anogam_AGAP000627	-0.134442	0.270788900209909	-0.496482264137326	0.619554197576505	0.737983533131874	Fem.Oenocytes vs Female total carcass cells	Female Oenocytes	1316.42	Female total carcass cells	1544.81	casein kinase 12C alpha	FALSE	FALSE	FALSE
Anogam_AGAP005781	-1.90081	0.572354983555792	-3.32103782048832	0.000896833834890259	0.00519321097826662	Fem.Oenocytes vs Female total carcass cells	Female Oenocytes	1314.37	Female total carcass cells	5234.48	glycine C-acetyltransferase	FALSE	FALSE	FALSE
Anogam_AGAP012755	2.22835	0.520064760139975	4.28474826384035	1.82946216890926e-05	0.000200632978695386	Fem.Oenocytes vs Female total carcass cells	Female Oenocytes	1313.41	Female total carcass cells	299.486	ER lumen protein retaining receptor	TRUE	FALSE	TRUE
Anogam_AGAP009563	0.709383	0.422454298240741	1.67919493096628	0.0931140595710343	0.193843958805864	Fem.Oenocytes vs Female total carcass cells	Female Oenocytes	1312.59	Female total carcass cells	857.683	myotubularin related protein 2	FALSE	FALSE	FALSE
Anogam_AGAP002141	-0.109235	0.31301313227968	-0.348978377153459	0.727105542829565	0.819625858128469	Fem.Oenocytes vs Female total carcass cells	Female Oenocytes	1309.18	Female total carcass cells	1510.74	protein phosphatase PTC7 homolog fig	FALSE	FALSE	FALSE
Anogam_AGAP004395	-0.679187	0.390439565051041	-1.73954480269334	0.0819389786866094	0.176952222440141	Fem.Oenocytes vs Female total carcass cells	Female Oenocytes	1308.42	Female total carcass cells	2242.29	nucleophosmin 3	FALSE	FALSE	FALSE
Anogam_AGAP008527	2.53135	0.425762097693909	5.94546662226395	2.75670420717432e-09	9.82808273442775e-08	Fem.Oenocytes vs Female total carcass cells	Female Oenocytes	1308.24	Female total carcass cells	241.578	CD63 antigen	TRUE	FALSE	TRUE
Anogam_AGAP012134	0.268406	0.355859120350735	0.75424685986742	0.450701004597289	0.597800819515583	Fem.Oenocytes vs Female total carcass cells	Female Oenocytes	1307.93	Female total carcass cells	1160.97	HIV-1 Vpr-binding protein	FALSE	FALSE	FALSE
Anogam_AGAP007082	-0.654179	0.31144587240945	-2.10045690691921	0.0356886675847905	0.0955933106616692	Fem.Oenocytes vs Female total carcass cells	Female Oenocytes	1307.86	Female total carcass cells	2202.09	NADH dehydrogenase (ubiquinone) Fe-S protein 4	FALSE	FALSE	FALSE
Anogam_AGAP008653	-0.227551	0.382762597780961	-0.594496472083532	0.552180101206649	0.686281446434418	Fem.Oenocytes vs Female total carcass cells	Female Oenocytes	1306.52	Female total carcass cells	1638.29	NADH dehydrogenase (ubiquinone) 1 alpha subcomplex 12	FALSE	FALSE	FALSE
Anogam_AGAP028463	-0.332404	1.43287283307528	-0.231984278037069	NA	NA	Fem.Oenocytes vs Female total carcass cells	Female Oenocytes	1305.82	Female total carcass cells	1755.37		FALSE	FALSE	FALSE
Anogam_AGAP011765	-1.35021	0.457577567411792	-2.95078208822429	0.00316970456999681	0.014327484472919	Fem.Oenocytes vs Female total carcass cells	Female Oenocytes	1304.89	Female total carcass cells	3556.24	Spondin-1	FALSE	FALSE	FALSE
Anogam_AGAP010539	1.50663	0.443957361434559	3.39364127339832	0.000689699738607881	0.00419810096694577	Fem.Oenocytes vs Female total carcass cells	Female Oenocytes	1303.29	Female total carcass cells	489.858	coiled-coil and C2 domain-containing protein 1-like	FALSE	FALSE	FALSE
Anogam_AGAP011627	-0.425246	0.250643676300743	-1.69661542485532	0.0897693916739696	0.188801729826939	Fem.Oenocytes vs Female total carcass cells	Female Oenocytes	1302.41	Female total carcass cells	1868.78	polyadenylate-binding protein-interacting protein 1	FALSE	FALSE	FALSE
Anogam_AGAP001797	0.35206	0.3638371524632	0.967631949736019	0.33322821493398	0.486320224676149	Fem.Oenocytes vs Female total carcass cells	Female Oenocytes	1302.28	Female total carcass cells	1089.74	Tropomyosin 1	FALSE	FALSE	FALSE
Anogam_AGAP003187	0.770399	0.34969581046908	2.20305485321843	0.0275908827028783	0.0785940734453928	Fem.Oenocytes vs Female total carcass cells	Female Oenocytes	1302.19	Female total carcass cells	817.35	protein-tyrosine phosphatase	FALSE	FALSE	FALSE
Anogam_AGAP011546	1.77244	0.341640961685128	5.18802631014663	2.12534581523886e-07	4.28549321034327e-06	Fem.Oenocytes vs Female total carcass cells	Female Oenocytes	1301.77	Female total carcass cells	408.277	calcium channel flower	TRUE	FALSE	TRUE
Anogam_AGAP011464	-0.211647	0.288402467145753	-0.733859428082812	0.463034416544006	0.609654326018483	Fem.Oenocytes vs Female total carcass cells	Female Oenocytes	1301.11	Female total carcass cells	1612.64		FALSE	FALSE	FALSE
Anogam_AGAP009082	0.463529	0.348375843778345	1.33054362860553	0.183339221602494	0.319143741993317	Fem.Oenocytes vs Female total carcass cells	Female Oenocytes	1300.68	Female total carcass cells	1009.72	DOX-A2 26S proteasome non-ATPase regulatory subunit 3	FALSE	FALSE	FALSE
Anogam_AGAP000618	-0.494718	0.295210373623931	-1.67581516892251	0.0937744019781747	0.19498063016474	Fem.Oenocytes vs Female total carcass cells	Female Oenocytes	1298.8	Female total carcass cells	1958.05	succinate dehydrogenase (ubiquinone) membrane anchor subunit	FALSE	FALSE	FALSE
Anogam_AGAP011829	-0.907726	0.290342728040107	-3.12639338099798	0.00176964659721954	0.00896819401269999	Fem.Oenocytes vs Female total carcass cells	Female Oenocytes	1298.06	Female total carcass cells	2604.14	NADH dehydrogenase (ubiquinone) 1 beta subcomplex 4	FALSE	FALSE	FALSE
Anogam_AGAP005263	0.230458	0.25845739909668	0.8916679363837	0.372570944454513	0.525306036056026	Fem.Oenocytes vs Female total carcass cells	Female Oenocytes	1298.04	Female total carcass cells	1183.85	protein transport protein SEC24	FALSE	FALSE	FALSE
Anogam_AGAP004220	3.47576	0.69626201182983	4.99203528380086	5.97463369302084e-07	1.0687491599124e-05	Fem.Oenocytes vs Female total carcass cells	Female Oenocytes	1297.21	Female total carcass cells	125.201		TRUE	FALSE	TRUE
Anogam_AGAP005293	0.367148	0.447936800606438	0.819642605864395	0.412419877670563	0.563475543134451	Fem.Oenocytes vs Female total carcass cells	Female Oenocytes	1297.04	Female total carcass cells	1074.88	beta-tubulin isotype I	FALSE	FALSE	FALSE
Anogam_AGAP003580	-2.65349	0.491723101050939	-5.39630446543563	6.80274719610621e-08	1.58917144544655e-06	Fem.Oenocytes vs Female total carcass cells	Female Oenocytes	1296.16	Female total carcass cells	8712		FALSE	TRUE	TRUE
Anogam_AGAP004205	1.24068	0.267668848747983	4.63513023453138	3.56712826967102e-06	4.97938014396642e-05	Fem.Oenocytes vs Female total carcass cells	Female Oenocytes	1295.59	Female total carcass cells	586.64	N-sulfoglucosamine sulfohydrolase	TRUE	FALSE	TRUE
Anogam_AGAP001209	0.913116	0.306573759523672	2.97845510219809	0.00289705470088153	0.0133225454828853	Fem.Oenocytes vs Female total carcass cells	Female Oenocytes	1295.01	Female total carcass cells	735.102	ubiquitin carboxyl-terminal hydrolase 6-32	FALSE	FALSE	FALSE
Anogam_AGAP012916	5.59306	0.932752413218872	5.99629865100382	2.01865626622531e-09	7.5108694240063e-08	Fem.Oenocytes vs Female total carcass cells	Female Oenocytes	1294.1	Female total carcass cells	28.774		TRUE	FALSE	TRUE
Anogam_AGAP005508	1.29699	0.386480203988429	3.35590948540464	0.000791044540315453	0.00467319153378043	Fem.Oenocytes vs Female total carcass cells	Female Oenocytes	1294.02	Female total carcass cells	564.077		FALSE	FALSE	FALSE
Anogam_AGAP003089	0.569323	0.221916410371268	2.56548532519646	0.010303157952143	0.0363523835056299	Fem.Oenocytes vs Female total carcass cells	Female Oenocytes	1291.9	Female total carcass cells	931.07	ATP-dependent RNA helicase	FALSE	FALSE	FALSE
Anogam_AGAP001651	1.05947	0.331099543981976	3.19985687807339	0.00137495846271969	0.00732738280757702	Fem.Oenocytes vs Female total carcass cells	Female Oenocytes	1291.66	Female total carcass cells	663.624	26S proteasome regulatory subunit N9	FALSE	FALSE	FALSE
Anogam_AGAP006907	1.64251	0.561432128996545	2.92556572505496	0.00343830538071406	0.0152694186872683	Fem.Oenocytes vs Female total carcass cells	Female Oenocytes	1288.85	Female total carcass cells	439.928	Cat eye syndrome chromosome region2C candidate 1a	FALSE	FALSE	FALSE
Anogam_AGAP004373	1.11654	0.361712194085502	3.08681788105579	0.00202311504222451	0.00996096302566274	Fem.Oenocytes vs Female total carcass cells	Female Oenocytes	1284.31	Female total carcass cells	634.45	elongation of very long chain fatty acids protein 1	FALSE	FALSE	FALSE
Anogam_AGAP010417	0.268134	0.261246207788857	1.02636626259996	0.304718974309671	0.456788719530207	Fem.Oenocytes vs Female total carcass cells	Female Oenocytes	1283.52	Female total carcass cells	1139.2	tetratricopeptide repeat protein 39B	FALSE	FALSE	FALSE
Anogam_AGAP002923	-0.999748	0.31525785359411	-3.17120604214641	0.00151807425611344	0.00792725972834285	Fem.Oenocytes vs Female total carcass cells	Female Oenocytes	1282.77	Female total carcass cells	2742.65	bystin	FALSE	FALSE	FALSE
Anogam_AGAP003192	0.238472	0.286837208481779	0.831384131358134	0.405756660659998	0.558099496151781	Fem.Oenocytes vs Female total carcass cells	Female Oenocytes	1281.38	Female total carcass cells	1162.54	alpha-soluble NSF attachment protein	FALSE	FALSE	FALSE
Anogam_AGAP003398	-0.631375	0.326155696220943	-1.93580939476239	0.0528910498619711	0.128211613880049	Fem.Oenocytes vs Female total carcass cells	Female Oenocytes	1281.25	Female total carcass cells	2123.92	nucleosome-remodeling factor 38 kDa subunit	FALSE	FALSE	FALSE
Anogam_AGAP004227	1.27573	0.27378195155233	4.6596394532215	3.16763733646867e-06	4.48909490675172e-05	Fem.Oenocytes vs Female total carcass cells	Female Oenocytes	1279.7	Female total carcass cells	565.1	ADP-ribosylation factor-like protein	TRUE	FALSE	TRUE
Anogam_AGAP004696	0.564529	0.228724582636357	2.46816101254737	0.0135809216367078	0.0452933475185118	Fem.Oenocytes vs Female total carcass cells	Female Oenocytes	1279.14	Female total carcass cells	925.055	exd Homeobox protein extradenticle	FALSE	FALSE	FALSE
Anogam_AGAP000498	0.534531	0.240411904055755	2.22339582942571	0.0261891206840412	0.0756541735852936	Fem.Oenocytes vs Female total carcass cells	Female Oenocytes	1278.6	Female total carcass cells	944.205	nuclear transport factor 2	FALSE	FALSE	FALSE
Anogam_AGAP000005	-0.397436	0.243937933007294	-1.62924961156486	0.103260188337745	0.210218513146003	Fem.Oenocytes vs Female total carcass cells	Female Oenocytes	1277.98	Female total carcass cells	1799.73	high mobility group protein B1	FALSE	FALSE	FALSE
Anogam_AGAP008532	-0.843239	0.478271622309406	-1.76309641297623	0.0778842301219607	0.170644848524176	Fem.Oenocytes vs Female total carcass cells	Female Oenocytes	1277.64	Female total carcass cells	2446.84	paxillin	FALSE	FALSE	FALSE
Anogam_AGAP028386	-0.100586	0.340437470021273	-0.295462225138181	0.767640804876607	0.849770672989456	Fem.Oenocytes vs Female total carcass cells	Female Oenocytes	1276.3	Female total carcass cells	1462.72	ND6 NADH dehydrogenase subunit 6	FALSE	FALSE	FALSE
Anogam_AGAP002459	1.74378	0.506738802550217	3.44117902224572	0.000579185191679884	0.00362681938878126	Fem.Oenocytes vs Female total carcass cells	Female Oenocytes	1276.22	Female total carcass cells	406.515		FALSE	FALSE	FALSE
Anogam_AGAP009907	0.69724	0.24250698457528	2.87513441171871	0.00403855534748562	0.0174495399323759	Fem.Oenocytes vs Female total carcass cells	Female Oenocytes	1275.68	Female total carcass cells	840.994	leukotriene-A4 hydrolase	FALSE	FALSE	FALSE
Anogam_AGAP002534	-0.841415	0.318196652164209	-2.6443228123096	0.00818545499107629	0.0303812532846727	Fem.Oenocytes vs Female total carcass cells	Female Oenocytes	1273.55	Female total carcass cells	2441.55	dihydropteridine reductase	FALSE	FALSE	FALSE
Anogam_AGAP001140	-0.328028	0.248669856436441	-1.31913231420049	0.187124881716982	0.323915038018637	Fem.Oenocytes vs Female total carcass cells	Female Oenocytes	1273.2	Female total carcass cells	1708.59		FALSE	FALSE	FALSE
Anogam_AGAP009564	-0.169111	0.310831873080184	-0.544059653549464	0.586400423371648	0.711834041041489	Fem.Oenocytes vs Female total carcass cells	Female Oenocytes	1272.59	Female total carcass cells	1531.34	ATP synthase epsilon chain2C mitochondrial	FALSE	FALSE	FALSE
Anogam_AGAP028206	3.0459	0.547370718692596	5.56459538468285	2.62761371653213e-08	7.03815276114051e-07	Fem.Oenocytes vs Female total carcass cells	Female Oenocytes	1272.11	Female total carcass cells	164.948		TRUE	FALSE	TRUE
Anogam_AGAP009527	-2.9986	0.663426827819121	-4.5198614862783	6.18801042327208e-06	8.0451998285794e-05	Fem.Oenocytes vs Female total carcass cells	Female Oenocytes	1272.07	Female total carcass cells	10833.7		FALSE	TRUE	TRUE
Anogam_AGAP011751	1.68322	0.464160037876842	3.62638287948955	0.000287419091936796	0.00203520563923688	Fem.Oenocytes vs Female total carcass cells	Female Oenocytes	1272.04	Female total carcass cells	423.433	Sorting nexin-33	FALSE	FALSE	FALSE
Anogam_AGAP012674	3.78427	0.668018901816186	5.66492094673193	1.4709233474718e-08	4.24261260741961e-07	Fem.Oenocytes vs Female total carcass cells	Female Oenocytes	1268.92	Female total carcass cells	98.5422		TRUE	FALSE	TRUE
Anogam_AGAP007749	0.950143	0.502178066651096	1.89204331801521	0.0584852094652358	0.138267251212637	Fem.Oenocytes vs Female total carcass cells	Female Oenocytes	1268.29	Female total carcass cells	701.124		FALSE	FALSE	FALSE
Anogam_AGAP011842	0.982842	0.262350359803724	3.74629592043899	0.000179464874894754	0.00136425304600529	Fem.Oenocytes vs Female total carcass cells	Female Oenocytes	1267.03	Female total carcass cells	685.573	signal peptidase complex subunit 2	FALSE	FALSE	FALSE
Anogam_AGAP008302	2.37534	1.06942529848504	2.22113764160314	0.0263416402187797	0.0759875000616167	Fem.Oenocytes vs Female total carcass cells	Female Oenocytes	1266.04	Female total carcass cells	260.164		FALSE	FALSE	FALSE
Anogam_AGAP009057	-0.165946	0.371709736228985	-0.446439694115985	0.655279665258017	0.765827702446605	Fem.Oenocytes vs Female total carcass cells	Female Oenocytes	1264.52	Female total carcass cells	1515.13	CCR4-NOT transcription complex2C subunit 1	FALSE	FALSE	FALSE
Anogam_AGAP028616	0.871686	0.28310742160983	3.07899290435455	0.00207701628591232	0.0101830525335194	Fem.Oenocytes vs Female total carcass cells	Female Oenocytes	1264.19	Female total carcass cells	737.725		FALSE	FALSE	FALSE
Anogam_AGAP002783	0.791825	0.313838106411692	2.52303641834786	0.0116346351121771	0.040082689046396	Fem.Oenocytes vs Female total carcass cells	Female Oenocytes	1264.07	Female total carcass cells	781.23	UDP glucuronosyltransferase 5 family2C polypeptide A2	FALSE	FALSE	FALSE
Anogam_AGAP002889	-0.514943	0.293993337749511	-1.75154673969808	0.0798517776178079	0.173691196553021	Fem.Oenocytes vs Female total carcass cells	Female Oenocytes	1263.62	Female total carcass cells	1931.52	NADH dehydrogenase (ubiquinone) 1 subcomplex unknown 2	FALSE	FALSE	FALSE
Anogam_AGAP007113	0.523426	0.494668481258365	1.0581343259868	0.289994207020651	0.441353670420244	Fem.Oenocytes vs Female total carcass cells	Female Oenocytes	1263.38	Female total carcass cells	942.326	1-acyl-sn-glycerol-3-phosphate acyltransferase gamma	FALSE	FALSE	FALSE
Anogam_AGAP005100	1.70155	0.414292143654891	4.10711581602979	4.00630373188473e-05	0.000384906101264268	Fem.Oenocytes vs Female total carcass cells	Female Oenocytes	1262.69	Female total carcass cells	414.884	charged multivesicular body protein 5	TRUE	FALSE	TRUE
Anogam_AGAP010368	0.690833	0.407377564047788	1.69580420013163	0.089922966811891	0.189047009743018	Fem.Oenocytes vs Female total carcass cells	Female Oenocytes	1260.6	Female total carcass cells	836.353	2-hydroxyacyl-CoA lyase 1	FALSE	FALSE	FALSE
Anogam_AGAP002024	2.23719	0.296282282630667	7.55086376829747	4.32380934161259e-14	6.9448962202982e-12	Fem.Oenocytes vs Female total carcass cells	Female Oenocytes	1259.77	Female total carcass cells	285.567		TRUE	FALSE	TRUE
Anogam_AGAP011309	-1.25824	0.254156817820897	-4.95063320694762	7.39724050306193e-07	1.2785230545157e-05	Fem.Oenocytes vs Female total carcass cells	Female Oenocytes	1258.38	Female total carcass cells	3217.98	nuclear GTP-binding protein	FALSE	TRUE	TRUE
Anogam_AGAP001335	0.212262	0.266341801414085	0.796953913748994	0.425477797447381	0.575421232901321	Fem.Oenocytes vs Female total carcass cells	Female Oenocytes	1258.32	Female total carcass cells	1162.47	dynein light chain LC8-type	FALSE	FALSE	FALSE
Anogam_AGAP007852	-1.20848	0.377177650334347	-3.20399571936172	0.00135534491798251	0.00723072058770768	Fem.Oenocytes vs Female total carcass cells	Female Oenocytes	1258.18	Female total carcass cells	3109.81	aconitate hydratase 1 - homoaconitase	FALSE	FALSE	FALSE
Anogam_AGAP002321	0.628721	0.336035273770651	1.87099673724741	0.0613455332604594	0.143569875645247	Fem.Oenocytes vs Female total carcass cells	Female Oenocytes	1257.57	Female total carcass cells	868.479		FALSE	FALSE	FALSE
Anogam_AGAP009835	0.679665	0.345621544221883	1.96649993346866	0.0492408900048719	0.121493317224463	Fem.Oenocytes vs Female total carcass cells	Female Oenocytes	1256.47	Female total carcass cells	838.727	ABCC14 ATP-binding cassette transporter (ABC transporter) family C member 14	FALSE	FALSE	FALSE
Anogam_AGAP003160	-0.76232	0.303930767754743	-2.50820211523949	0.0121347235256189	0.0414117295909234	Fem.Oenocytes vs Female total carcass cells	Female Oenocytes	1255.65	Female total carcass cells	2275.01	MAP kinase interacting serine-threonine kinase	FALSE	FALSE	FALSE
Anogam_AGAP011768	0.666512	0.441803513552861	1.50861664735873	0.131396777413178	0.25148743480951	Fem.Oenocytes vs Female total carcass cells	Female Oenocytes	1255.19	Female total carcass cells	844.83	growth factor receptor-binding protein 2	FALSE	FALSE	FALSE
Anogam_AGAP003857	0.446015	0.240786341490224	1.85232759093617	0.0639787960460437	0.147872383361897	Fem.Oenocytes vs Female total carcass cells	Female Oenocytes	1254.4	Female total carcass cells	983.675	ubiquitin-conjugating enzyme E2 A	FALSE	FALSE	FALSE
Anogam_AGAP009945	0.924291	0.283644701309709	3.25862233480884	0.00111954595726799	0.00619869817898599	Fem.Oenocytes vs Female total carcass cells	Female Oenocytes	1254.28	Female total carcass cells	706.775	dihydrodiol dehydrogenase - D-xylose 1-dehydrogenase (NADP)	FALSE	FALSE	FALSE
Anogam_AGAP007780	-0.729011	0.307763580126949	-2.36873593196703	0.0178489921974275	0.0562460388555829	Fem.Oenocytes vs Female total carcass cells	Female Oenocytes	1253.58	Female total carcass cells	2223.85	NADH dehydrogenase (ubiquinone) 1 beta subcomplex 10	FALSE	FALSE	FALSE
Anogam_AGAP009172	0.240704	0.248475305260093	0.968724479967167	0.332682675160545	0.486009299292219	Fem.Oenocytes vs Female total carcass cells	Female Oenocytes	1251.36	Female total carcass cells	1132.21	prolyl oligopeptidase	FALSE	FALSE	FALSE
Anogam_AGAP003405	-0.795463	0.228471541805427	-3.48167355372005	0.000498290757098236	0.00320661070857179	Fem.Oenocytes vs Female total carcass cells	Female Oenocytes	1250.24	Female total carcass cells	2321.01	adenylosuccinate synthase	FALSE	FALSE	FALSE
Anogam_AGAP006159	2.25055	0.643837957621271	3.49552203368721	0.000473135387466852	0.00307780617609034	Fem.Oenocytes vs Female total carcass cells	Female Oenocytes	1249.38	Female total carcass cells	280.486	Ras-related protein Rab-5C	FALSE	FALSE	FALSE
Anogam_AGAP000095	0.588626	0.349718031778536	1.68314411982618	0.0923471952941496	0.192757344400192	Fem.Oenocytes vs Female total carcass cells	Female Oenocytes	1248.21	Female total carcass cells	887.987	anoctamin 5	FALSE	FALSE	FALSE
Anogam_AGAP001649	2.53095	0.429891213442469	5.8874282858767	3.9225128381365e-09	1.34231275450878e-07	Fem.Oenocytes vs Female total carcass cells	Female Oenocytes	1247.03	Female total carcass cells	231.02	Glucosylceramidase	TRUE	FALSE	TRUE
Anogam_AGAP004762	2.62391	0.600900059527203	4.36663753254607	1.26173852191282e-05	0.000148562814225685	Fem.Oenocytes vs Female total carcass cells	Female Oenocytes	1244.17	Female total carcass cells	216.382	alpha-tocopherol transfer protein-like protein	TRUE	FALSE	TRUE
Anogam_AGAP001548	-0.841021	0.315282141487335	-2.66751840740749	0.00764137031597258	0.0287858685832791	Fem.Oenocytes vs Female total carcass cells	Female Oenocytes	1243.36	Female total carcass cells	2380.75	Stress-associated endoplasmic reticulum protein 2	FALSE	FALSE	FALSE
Anogam_AGAP010130	0.171865	0.28515375964726	0.602710494973744	0.546701298568153	0.682131797701539	Fem.Oenocytes vs Female total carcass cells	Female Oenocytes	1241.21	Female total carcass cells	1178.72	32C2-trans-enoyl-CoA isomerase mitochondrial	FALSE	FALSE	FALSE
Anogam_AGAP000812	-0.265445	0.378117070421165	-0.702018228396179	0.482667795692421	0.626574078346212	Fem.Oenocytes vs Female total carcass cells	Female Oenocytes	1240.77	Female total carcass cells	1594.48	calcium binding protein	FALSE	FALSE	FALSE
Anogam_AGAP007668	-0.492608	0.255009696937654	-1.93172082349951	0.0533939731604248	0.129063816058934	Fem.Oenocytes vs Female total carcass cells	Female Oenocytes	1240.5	Female total carcass cells	1866.36	eIF3g Eukaryotic translation initiation factor 3 subunit G	FALSE	FALSE	FALSE
Anogam_AGAP013027	3.59293	0.577237537893838	6.22436103066721	4.83522504841895e-10	2.09635689387385e-08	Fem.Oenocytes vs Female total carcass cells	Female Oenocytes	1239.27	Female total carcass cells	109.881	Protein toll	TRUE	FALSE	TRUE
Anogam_AGAP009119	0.833922	0.25716007418088	3.24281456459773	0.00118355215514532	0.00647599232697695	Fem.Oenocytes vs Female total carcass cells	Female Oenocytes	1236.88	Female total carcass cells	741.059	suppressor of tumorigenicity protein 13	FALSE	FALSE	FALSE
Anogam_AGAP003662	0.180158	0.350118432033803	0.514562322782448	0.606858899283541	0.728987842007219	Fem.Oenocytes vs Female total carcass cells	Female Oenocytes	1236.21	Female total carcass cells	1166.27	Prenylated Rab acceptor protein 1	FALSE	FALSE	FALSE
Anogam_AGAP002788	-0.32865	0.279563090427351	-1.17558433842635	0.239761016994126	0.386701564609694	Fem.Oenocytes vs Female total carcass cells	Female Oenocytes	1235.29	Female total carcass cells	1660.26	MICOS complex subunit	FALSE	FALSE	FALSE
Anogam_AGAP007299	-0.185731	0.258197344101013	-0.719337892329187	0.471932754075859	0.616628955148688	Fem.Oenocytes vs Female total carcass cells	Female Oenocytes	1235.25	Female total carcass cells	1502.65		FALSE	FALSE	FALSE
Anogam_AGAP011082	0.963448	0.277950712542348	3.46625413895745	0.000527764169559235	0.00335408880927335	Fem.Oenocytes vs Female total carcass cells	Female Oenocytes	1233.61	Female total carcass cells	677.014	heat shock transcription factor2C invertebrate	FALSE	FALSE	FALSE
Anogam_AGAP001957	0.910747	0.256216932888176	3.55459492651728	0.000378561828790301	0.00256348707626471	Fem.Oenocytes vs Female total carcass cells	Female Oenocytes	1231.96	Female total carcass cells	701.396	phosphatidylinositol transfer protein2C beta	FALSE	FALSE	FALSE
Anogam_AGAP008693	0.610883	0.248692057015317	2.45638332264173	0.0140343367767771	0.0464722763430365	Fem.Oenocytes vs Female total carcass cells	Female Oenocytes	1231.7	Female total carcass cells	862.886	Leptin receptor overlapping transcript-like 1	FALSE	FALSE	FALSE
Anogam_AGAP004848	0.620878	0.371134522934289	1.67291960659561	0.094343123452899	0.195844763475363	Fem.Oenocytes vs Female total carcass cells	Female Oenocytes	1231.32	Female total carcass cells	856.487		FALSE	FALSE	FALSE
Anogam_AGAP012047	3.22948	0.69168499114893	4.66900065204323	3.02668418510322e-06	4.30723679860586e-05	Fem.Oenocytes vs Female total carcass cells	Female Oenocytes	1229.02	Female total carcass cells	140.727	arylsulfatase B precursor	TRUE	FALSE	TRUE
Anogam_AGAP008008	-0.255797	0.344059648932417	-0.743468403316436	0.457198144227992	0.604321329510504	Fem.Oenocytes vs Female total carcass cells	Female Oenocytes	1228.91	Female total carcass cells	1569.57	coiled-coil domain-containing protein 72 homolog	FALSE	FALSE	FALSE
Anogam_AGAP007256	1.96446	0.598699997568676	3.28120278522696	0.00103365399484332	0.00582005961166142	Fem.Oenocytes vs Female total carcass cells	Female Oenocytes	1225.36	Female total carcass cells	335.14	Multiple epidermal growth factor-like domains 10	FALSE	FALSE	FALSE
Anogam_AGAP011504	-0.168713	0.285592956468957	-0.590745209662009	0.55469115113918	0.688368691140823	Fem.Oenocytes vs Female total carcass cells	Female Oenocytes	1224.64	Female total carcass cells	1473.04	protein transport protein SEC61 subunit beta	FALSE	FALSE	FALSE
Anogam_AGAP012647	2.1638	0.443115256252578	4.88315957410896	1.04399315521415e-06	1.70914207426419e-05	Fem.Oenocytes vs Female total carcass cells	Female Oenocytes	1224.02	Female total carcass cells	292.171	sulfotransferase	TRUE	FALSE	TRUE
Anogam_AGAP007948	-0.936201	0.26516883417066	-3.53058515407609	0.000414641520941739	0.00275673297093949	Fem.Oenocytes vs Female total carcass cells	Female Oenocytes	1222.09	Female total carcass cells	2501.59	NET1-associated nuclear protein 1 (U3 small nucleolar RNA-associated protein 1	FALSE	FALSE	FALSE
Anogam_AGAP005005	-0.524807	0.244343978931981	-2.14781983861379	0.0317280703930259	0.0872223579423539	Fem.Oenocytes vs Female total carcass cells	Female Oenocytes	1221.99	Female total carcass cells	1878.16		FALSE	FALSE	FALSE
Anogam_AGAP005894	-0.204081	0.324911924805065	-0.628110437641159	0.529931595953189	0.668754327798844	Fem.Oenocytes vs Female total carcass cells	Female Oenocytes	1221.73	Female total carcass cells	1504.28	electron-transferring-flavoprotein dehydrogenase	FALSE	FALSE	FALSE
Anogam_AGAP003319	0.488074	0.663954379167448	0.735101335685351	0.462277780940971	0.609225432069554	Fem.Oenocytes vs Female total carcass cells	Female Oenocytes	1219.93	Female total carcass cells	927.734		FALSE	FALSE	FALSE
Anogam_AGAP002008	2.66882	0.340271299149178	7.84321391408122	4.39158936988626e-15	9.19477738066853e-13	Fem.Oenocytes vs Female total carcass cells	Female Oenocytes	1219.35	Female total carcass cells	205.615		TRUE	FALSE	TRUE
Anogam_AGAP001712	1.51804	0.355162975102064	4.27419800914278	1.91826506366141e-05	0.000208805192887059	Fem.Oenocytes vs Female total carcass cells	Female Oenocytes	1217.26	Female total carcass cells	454.466	actin related protein 2-3 complex2C subunit 3	TRUE	FALSE	TRUE
Anogam_AGAP012113	0.223651	0.356550769519866	0.627262978819052	0.530486866561781	0.669124952990649	Fem.Oenocytes vs Female total carcass cells	Female Oenocytes	1217.07	Female total carcass cells	1114.86	ubiquitin carboxyl-terminal hydrolase L3	FALSE	FALSE	FALSE
Anogam_AGAP010303	0.501782	0.264200971576401	1.89924219121166	0.0575326397338163	0.136773691857902	Fem.Oenocytes vs Female total carcass cells	Female Oenocytes	1216.61	Female total carcass cells	918.733	autophagy-related protein 7	FALSE	FALSE	FALSE
Anogam_AGAP008419	1.64921	0.33215540554508	4.96518507924563	6.86355833211396e-07	1.20452954735507e-05	Fem.Oenocytes vs Female total carcass cells	Female Oenocytes	1216.02	Female total carcass cells	414.908	Ras-related protein Rab-14	TRUE	FALSE	TRUE
Anogam_AGAP003397	-0.75744	0.272439161966792	-2.78021855937606	0.00543223240858551	0.0220828772366495	Fem.Oenocytes vs Female total carcass cells	Female Oenocytes	1215.3	Female total carcass cells	2194.98	Similar to ATP-dependent RNA helicase dbp5	FALSE	FALSE	FALSE
Anogam_AGAP007542	1.44567	0.332400295364068	4.3491855690245	1.36644050309733e-05	0.000159313327871611	Fem.Oenocytes vs Female total carcass cells	Female Oenocytes	1214.04	Female total carcass cells	476.692	vacuolar protein sorting-associated protein VTA1	TRUE	FALSE	TRUE
Anogam_AGAP009897	-0.777001	0.651162818689732	-1.19325117683475	0.232771017248212	0.378891671728239	Fem.Oenocytes vs Female total carcass cells	Female Oenocytes	1214.02	Female total carcass cells	2224.24	proton-coupled amino acid transporter	FALSE	FALSE	FALSE
Anogam_AGAP003843	-0.518573	0.283874635761302	-1.82676702907586	0.0677348052027791	0.154150917890311	Fem.Oenocytes vs Female total carcass cells	Female Oenocytes	1213.56	Female total carcass cells	1859	cytochrome c heme-lyase	FALSE	FALSE	FALSE
Anogam_AGAP010490	0.814711	0.32269525186446	2.52470680461929	0.0115794851811559	0.0399195729021521	Fem.Oenocytes vs Female total carcass cells	Female Oenocytes	1211.4	Female total carcass cells	735.538	rabconnectin	FALSE	FALSE	FALSE
Anogam_AGAP012533	-0.0465933	0.341502052684053	-0.136436478460479	0.8914762376485	0.934492865855901	Fem.Oenocytes vs Female total carcass cells	Female Oenocytes	1211.23	Female total carcass cells	1339.47	NADH dehydrogenase (ubiquinone) 1 alpha subcomplex 6	FALSE	FALSE	FALSE
Anogam_AGAP007172	-0.430016	0.257497441988982	-1.66998225286021	0.0949228749462452	0.196888476880191	Fem.Oenocytes vs Female total carcass cells	Female Oenocytes	1210.39	Female total carcass cells	1744.52	translation initiation factor 4E	FALSE	FALSE	FALSE
Anogam_AGAP028383	-0.0668044	0.329819316167743	-0.202548399869826	0.839488024804106	0.899250572633544	Fem.Oenocytes vs Female total carcass cells	Female Oenocytes	1209.9	Female total carcass cells	1355.96	ND4L NADH dehydrogenase subunit 4L	FALSE	FALSE	FALSE
Anogam_AGAP007491	0.97511	0.360329766442096	2.70615944533456	0.00680663562314906	0.0262714053927051	Fem.Oenocytes vs Female total carcass cells	Female Oenocytes	1209.49	Female total carcass cells	658.322	Sulfhydryl oxidase	FALSE	FALSE	FALSE
Anogam_AGAP006100	1.97414	0.288090717517749	6.85250811093602	7.25662707348721e-12	5.66792429129169e-10	Fem.Oenocytes vs Female total carcass cells	Female Oenocytes	1209.39	Female total carcass cells	329.293	syntaxin 8	TRUE	FALSE	TRUE
Anogam_AGAP001678	0.474261	0.284049679736115	1.6696397009207	0.0949906705669327	0.196986112621697	Fem.Oenocytes vs Female total carcass cells	Female Oenocytes	1208.88	Female total carcass cells	930.492		FALSE	FALSE	FALSE
Anogam_AGAP008983	0.104999	0.392068419285405	0.267807623857205	0.788847402033253	0.863907376389195	Fem.Oenocytes vs Female total carcass cells	Female Oenocytes	1206.67	Female total carcass cells	1198.27		FALSE	FALSE	FALSE
Anogam_AGAP007000	0.0804289	0.397616768603244	0.202277324822322	0.839699925737808	0.899383402088271	Fem.Oenocytes vs Female total carcass cells	Female Oenocytes	1205.09	Female total carcass cells	1220.72		FALSE	FALSE	FALSE
Anogam_AGAP000552	1.40705	0.267309012331913	5.26375300741053	1.41144042009161e-07	2.95939720868388e-06	Fem.Oenocytes vs Female total carcass cells	Female Oenocytes	1200.21	Female total carcass cells	484.272	TBC domain-containing protein kinase-like protein	TRUE	FALSE	TRUE
Anogam_AGAP003017	0.791673	0.239679592637005	3.30304873786271	0.00095639763797407	0.00547920528093544	Fem.Oenocytes vs Female total carcass cells	Female Oenocytes	1199.85	Female total carcass cells	741.313	serine-threonine-protein phosphatase 6 catalytic subunit	FALSE	FALSE	FALSE
Anogam_AGAP004556	-1.0194	0.268630149914639	-3.79480161393376	0.000147761557532521	0.0011621031949829	Fem.Oenocytes vs Female total carcass cells	Female Oenocytes	1198.04	Female total carcass cells	2595.86	ribosome biogenesis protein SSF1-2	FALSE	FALSE	FALSE
Anogam_AGAP001273	-0.446427	0.336440854419448	-1.32691048650522	0.184538295057681	0.320630978948921	Fem.Oenocytes vs Female total carcass cells	Female Oenocytes	1195.96	Female total carcass cells	1739.89	karyopherin (importin) alpha 4	FALSE	FALSE	FALSE
Anogam_AGAP001279	-0.246603	0.241139231544327	-1.02265675373742	0.306470165517246	0.458718919661057	Fem.Oenocytes vs Female total carcass cells	Female Oenocytes	1195.84	Female total carcass cells	1517.81	protein phosphatase 32C catalytic subunit	FALSE	FALSE	FALSE
Anogam_AGAP006107	0.604432	0.326878456193548	1.84910442520601	0.0644427355328873	0.148542029730233	Fem.Oenocytes vs Female total carcass cells	Female Oenocytes	1195.4	Female total carcass cells	841.557	triple functional domain (PTPRF interacting)	FALSE	FALSE	FALSE
Anogam_AGAP011827	-0.582483	0.481047502232011	-1.21086396439272	0.225947545470039	0.370852628368534	Fem.Oenocytes vs Female total carcass cells	Female Oenocytes	1194.86	Female total carcass cells	1915.79	acetyl-CoA acyltransferase	FALSE	FALSE	FALSE
Anogam_AGAP009213	-2.69335	0.694897340768461	-3.8758973453626	0.000106232467307832	0.000883715939425799	Fem.Oenocytes vs Female total carcass cells	Female Oenocytes	1194.49	Female total carcass cells	8235.22	SRPN16 serine protease inhibitor (serpin) 16	FALSE	TRUE	TRUE
Anogam_AGAP004407	1.10017	0.281703537030865	3.9054026343375	9.40686285201396e-05	0.000794150335823488	Fem.Oenocytes vs Female total carcass cells	Female Oenocytes	1194.45	Female total carcass cells	595.731	lectin2C mannose-binding 2	TRUE	FALSE	TRUE
Anogam_AGAP010841	1.81063	0.616575820475738	2.93658439736943	0.00331848507863638	0.0148728599757369	Fem.Oenocytes vs Female total carcass cells	Female Oenocytes	1193.57	Female total carcass cells	363.429		FALSE	FALSE	FALSE
Anogam_AGAP007665	-0.940405	0.426548680316044	-2.20468317935037	0.0274763342839615	0.0783113794967951	Fem.Oenocytes vs Female total carcass cells	Female Oenocytes	1193.24	Female total carcass cells	2452.95		FALSE	FALSE	FALSE
Anogam_AGAP005401	-0.560842	0.230969405291442	-2.42820714958536	0.015173673816677	0.049523773681735	Fem.Oenocytes vs Female total carcass cells	Female Oenocytes	1191.76	Female total carcass cells	1879.31	karyopherin (Importin) alpha 6	FALSE	FALSE	FALSE
Anogam_AGAP007610	1.41173	0.365467804271963	3.86280200334317	0.000112093858040511	0.000921240446161049	Fem.Oenocytes vs Female total carcass cells	Female Oenocytes	1190.39	Female total carcass cells	478.989		TRUE	FALSE	TRUE
Anogam_AGAP004917	4.05114	0.834311840350702	4.85566468622328	NA	NA	Fem.Oenocytes vs Female total carcass cells	Female Oenocytes	1187.55	Female total carcass cells	76.6055	fibrinogen-related protein 1	FALSE	FALSE	FALSE
Anogam_AGAP009788	0.569052	0.291150526265734	1.95449417541152	0.0506428030257693	0.124114289954412	Fem.Oenocytes vs Female total carcass cells	Female Oenocytes	1185.68	Female total carcass cells	854.72	translocation protein SEC62	FALSE	FALSE	FALSE
Anogam_AGAP009473	-1.45327	0.449872085171177	-3.23041120857036	0.00123612292504469	0.00670626180755952	Fem.Oenocytes vs Female total carcass cells	Female Oenocytes	1185.3	Female total carcass cells	3473.86	salivary secreted mucin 3	FALSE	FALSE	FALSE
Anogam_AGAP007653	0.167167	0.298935193581539	0.559207114525085	0.576020378229755	0.703658131571974	Fem.Oenocytes vs Female total carcass cells	Female Oenocytes	1184.85	Female total carcass cells	1129.07	mitochondrial folate transporter-carrier	FALSE	FALSE	FALSE
Anogam_AGAP011964	1.86998	0.355886717224861	5.25443142414244	1.4848245601814e-07	3.10055610199511e-06	Fem.Oenocytes vs Female total carcass cells	Female Oenocytes	1184.14	Female total carcass cells	346.736		TRUE	FALSE	TRUE
Anogam_AGAP003687	-0.333451	0.489136082998473	-0.681715031316836	0.495419160909501	0.636825232968092	Fem.Oenocytes vs Female total carcass cells	Female Oenocytes	1181.47	Female total carcass cells	1590.68	glycerol-3-phosphate O-acyltransferase 1-2	FALSE	FALSE	FALSE
Anogam_AGAP010269	2.33817	0.628678666868788	3.71918838753641	0.000199863949316084	0.00149161774573463	Fem.Oenocytes vs Female total carcass cells	Female Oenocytes	1180.55	Female total carcass cells	250.489		FALSE	FALSE	FALSE
Anogam_AGAP008615	0.687294	0.298875468427233	2.29959835845741	0.0214709851863328	0.0650166085902804	Fem.Oenocytes vs Female total carcass cells	Female Oenocytes	1180.11	Female total carcass cells	783.463	Canopy homolog 2	FALSE	FALSE	FALSE
Anogam_AGAP010499	-0.19349	0.322379266213625	-0.600193393818932	0.548377355821424	0.683601011789086	Fem.Oenocytes vs Female total carcass cells	Female Oenocytes	1178.87	Female total carcass cells	1442.13	AD20590 S-(hydroxymethyl)glutathione dehydrogenase	FALSE	FALSE	FALSE
Anogam_AGAP007810	0.206322	0.34168612285523	0.603835591253859	0.545952954149431	0.681693114447751	Fem.Oenocytes vs Female total carcass cells	Female Oenocytes	1178.48	Female total carcass cells	1091.03	DNA-directed RNA polymerase II subunit RPB1	FALSE	FALSE	FALSE
Anogam_AGAP003372	-1.5342	0.408493525508958	-3.7557425264444	0.000172828303720322	0.00132067154866792	Fem.Oenocytes vs Female total carcass cells	Female Oenocytes	1178.42	Female total carcass cells	3646.14	Haloacid dehalogenase-like hydrolase domain-containing protein 1A	FALSE	FALSE	FALSE
Anogam_AGAP010405	1.90823	0.37665551941959	5.06623975545757	4.05750819967178e-07	7.54844070891667e-06	Fem.Oenocytes vs Female total carcass cells	Female Oenocytes	1178.29	Female total carcass cells	336.288	transcription factor MAFF-G-K	TRUE	FALSE	TRUE
Anogam_AGAP004766	1.2751	0.365037284129437	3.49306589576403	0.000477508660709427	0.00310017044186476	Fem.Oenocytes vs Female total carcass cells	Female Oenocytes	1177.17	Female total carcass cells	519.883	endophilin-A	FALSE	FALSE	FALSE
Anogam_AGAP003652	-0.0557723	0.318998428450481	-0.174835584504409	0.8612088265656	0.914475790101621	Fem.Oenocytes vs Female total carcass cells	Female Oenocytes	1174.98	Female total carcass cells	1307.29	aldehyde dehydrogenase (NAD+)	FALSE	FALSE	FALSE
Anogam_AGAP004348	-0.619155	0.272781134971027	-2.26978554731132	0.0232205978962616	0.0688875493402576	Fem.Oenocytes vs Female total carcass cells	Female Oenocytes	1174.88	Female total carcass cells	1931.06		FALSE	FALSE	FALSE
Anogam_AGAP004494	1.50513	0.485138170802671	3.10246700579227	0.00191914939776203	0.00955558960481804	Fem.Oenocytes vs Female total carcass cells	Female Oenocytes	1174.6	Female total carcass cells	442.292		FALSE	FALSE	FALSE
Anogam_AGAP001613	0.159871	0.233643910754783	0.684251819763969	0.493816165171861	0.635643100017421	Fem.Oenocytes vs Female total carcass cells	Female Oenocytes	1173.84	Female total carcass cells	1122.53		FALSE	FALSE	FALSE
Anogam_AGAP012413	-0.961924	0.430251911391414	-2.23572259879118	0.0253699477690936	0.0737877503051069	Fem.Oenocytes vs Female total carcass cells	Female Oenocytes	1171.14	Female total carcass cells	2437.11	CycA cyclin A	FALSE	FALSE	FALSE
Anogam_AGAP012920	-1.36423	0.503357497740208	-2.71025997978652	0.00672304881085635	0.0260865511690111	Fem.Oenocytes vs Female total carcass cells	Female Oenocytes	1170.54	Female total carcass cells	3225.84		FALSE	FALSE	FALSE
Anogam_AGAP010551	0.623656	0.398047384827249	1.56678888771156	0.117164045659112	0.230486344942893	Fem.Oenocytes vs Female total carcass cells	Female Oenocytes	1170.38	Female total carcass cells	811.853	STE20-like kinase	FALSE	FALSE	FALSE
Anogam_AGAP005121	1.02398	0.303731655958632	3.37133654728574	0.000748044135292236	0.00447948925030841	Fem.Oenocytes vs Female total carcass cells	Female Oenocytes	1169.39	Female total carcass cells	615.521	PRA1 family protein	FALSE	FALSE	FALSE
Anogam_AGAP012292	0.390571	0.54718282852423	0.713785605076788	0.475359762198077	0.620313874099059	Fem.Oenocytes vs Female total carcass cells	Female Oenocytes	1169.33	Female total carcass cells	951.305	CYP9J4 cytochrome P450	FALSE	FALSE	FALSE
Anogam_AGAP001942	1.36156	0.383318949387165	3.55203006502957	0.000382271179101649	0.002583486594827	Fem.Oenocytes vs Female total carcass cells	Female Oenocytes	1168.68	Female total carcass cells	486.881		FALSE	FALSE	FALSE
Anogam_AGAP000700	1.46593	0.270442913282987	5.42048151710774	5.94387179089087e-08	1.41972474471655e-06	Fem.Oenocytes vs Female total carcass cells	Female Oenocytes	1166.62	Female total carcass cells	451.953	Vesicle-associated membrane protein 7	TRUE	FALSE	TRUE
Anogam_AGAP005109	-0.00253733	0.37969424371587	-0.00668256567493711	0.994668123705432	0.99700439319286	Fem.Oenocytes vs Female total carcass cells	Female Oenocytes	1163.21	Female total carcass cells	1248.09	MICOS complex subunit MIC13	FALSE	FALSE	FALSE
Anogam_AGAP009255	1.65109	0.303515196468605	5.4398796974967	5.33165617509005e-08	1.28663929206418e-06	Fem.Oenocytes vs Female total carcass cells	Female Oenocytes	1163.14	Female total carcass cells	396.011	Sorting nexin-2	TRUE	FALSE	TRUE
Anogam_AGAP010428	-1.58556	0.379201774165217	-4.18130252918568	2.8984391188381e-05	0.000295976337963587	Fem.Oenocytes vs Female total carcass cells	Female Oenocytes	1162.78	Female total carcass cells	3728.68	12C4-alpha-glucan branching enzyme	FALSE	TRUE	TRUE
Anogam_AGAP013341	1.35526	0.326294253305435	4.15349099398091	3.2744110577154e-05	0.000327505121627995	Fem.Oenocytes vs Female total carcass cells	Female Oenocytes	1160.78	Female total carcass cells	486.023		TRUE	FALSE	TRUE
Anogam_AGAP012350	1.02828	0.334844018889431	3.07093623175623	0.0021338871917489	0.0103773449362998	Fem.Oenocytes vs Female total carcass cells	Female Oenocytes	1158.94	Female total carcass cells	608.371	Echinoderm microtubule associated protein like 1	FALSE	FALSE	FALSE
Anogam_AGAP004631	-0.319277	0.324742295852094	-0.983171482029201	0.325523047861015	0.478212753153468	Fem.Oenocytes vs Female total carcass cells	Female Oenocytes	1158.11	Female total carcass cells	1545.86		FALSE	FALSE	FALSE
Anogam_AGAP029166	3.95397	0.63969664438343	6.18101366245123	6.36913035643155e-10	2.63841869663998e-08	Fem.Oenocytes vs Female total carcass cells	Female Oenocytes	1157.2	Female total carcass cells	79.633		TRUE	FALSE	TRUE
Anogam_AGAP003424	0.908287	0.366355004507907	2.4792523363093	0.0131658127058324	0.0442987818500745	Fem.Oenocytes vs Female total carcass cells	Female Oenocytes	1156.62	Female total carcass cells	659.06	catenin alpha	FALSE	FALSE	FALSE
Anogam_AGAP012339	-0.744737	0.357950984521733	-2.08055543840424	0.0374746162843844	0.0991935813380288	Fem.Oenocytes vs Female total carcass cells	Female Oenocytes	1156.09	Female total carcass cells	2071.82	Translocase of outer mitochondrial membrane 20 homolog	FALSE	FALSE	FALSE
Anogam_AGAP012332	2.28388	0.852193818214905	2.68000632548829	NA	NA	Fem.Oenocytes vs Female total carcass cells	Female Oenocytes	1156	Female total carcass cells	253.245	Differentially expressed in FDCP 6-like protein	FALSE	FALSE	FALSE
Anogam_AGAP006996	-0.556888	0.291970432631787	-1.90734392476433	0.0564760656843348	0.13488867975773	Fem.Oenocytes vs Female total carcass cells	Female Oenocytes	1155.79	Female total carcass cells	1816.76	mitochondrial translation elongation factor TU	FALSE	FALSE	FALSE
Anogam_AGAP013252	1.44637	1.01332086483952	1.4273557929203	NA	NA	Fem.Oenocytes vs Female total carcass cells	Female Oenocytes	1155.5	Female total carcass cells	452.721		FALSE	FALSE	FALSE
Anogam_AGAP006133	0.18619	0.361725400812141	0.514726226974983	0.606744343562994	0.728987842007219	Fem.Oenocytes vs Female total carcass cells	Female Oenocytes	1155.39	Female total carcass cells	1084.22	nucleosome-remodeling factor subunit BPTF	FALSE	FALSE	FALSE
Anogam_AGAP008761	-0.491105	0.310158988719646	-1.58339879158809	0.113330598249115	0.22507738378978	Fem.Oenocytes vs Female total carcass cells	Female Oenocytes	1154.44	Female total carcass cells	1734.72	translocon-associated protein subunit gamma	FALSE	FALSE	FALSE
Anogam_AGAP007636	1.29781	0.369442692383312	3.51289527631629	0.000443252145103708	0.00291475318039919	Fem.Oenocytes vs Female total carcass cells	Female Oenocytes	1154.15	Female total carcass cells	501.45	phosphatidate phosphatase LPIN	FALSE	FALSE	FALSE
Anogam_AGAP000011	-0.376719	0.682560243338404	-0.551921037801052	0.581002454000526	0.707677616018661	Fem.Oenocytes vs Female total carcass cells	Female Oenocytes	1153.39	Female total carcass cells	1603.54	branched-chain-amino-acid aminotransferase 2	FALSE	FALSE	FALSE
Anogam_AGAP003612	-0.404166	0.264948242494835	-1.52545264384676	0.127146236700376	0.245232854649999	Fem.Oenocytes vs Female total carcass cells	Female Oenocytes	1152.76	Female total carcass cells	1632.63		FALSE	FALSE	FALSE
Anogam_AGAP007253	1.79872	0.592373718998586	3.03646407074393	0.00239370634816649	0.0114290262969853	Fem.Oenocytes vs Female total carcass cells	Female Oenocytes	1151.83	Female total carcass cells	353.185	hippocampus abundant gene transcript 1	FALSE	FALSE	FALSE
Anogam_AGAP005300	1.13092	0.404592533778029	2.79521536533291	0.0051865151080232	0.0212784110017899	Fem.Oenocytes vs Female total carcass cells	Female Oenocytes	1151.28	Female total carcass cells	561.404	nuclear factor erythroid 22C invertebrate	FALSE	FALSE	FALSE
Anogam_AGAP012103	-0.196784	0.351537554746873	-0.559780122639133	0.575629423426505	0.703348490625746	Fem.Oenocytes vs Female total carcass cells	Female Oenocytes	1150.37	Female total carcass cells	1408.95	Insulin-like growth factor 2 mRNA-binding protein 2	FALSE	FALSE	FALSE
Anogam_AGAP010935	1.37611	0.309468539221093	4.44670385121397	8.71979186719287e-06	0.00010775472268734	Fem.Oenocytes vs Female total carcass cells	Female Oenocytes	1149.96	Female total carcass cells	474.41	porphobilinogen synthase	TRUE	FALSE	TRUE
Anogam_AGAP010587	1.2069	0.398284588618647	3.03024098436588	0.00244358680940071	0.0116237936930674	Fem.Oenocytes vs Female total carcass cells	Female Oenocytes	1149.7	Female total carcass cells	532.322	tetratricopeptide repeat protein 7B	FALSE	FALSE	FALSE
Anogam_AGAP001711	-0.513327	0.320830499070318	-1.59999345396546	0.109600035589952	0.219414510693874	Fem.Oenocytes vs Female total carcass cells	Female Oenocytes	1149.23	Female total carcass cells	1755.28	NADH dehydrogenase (ubiquinone) Fe-S protein 8	FALSE	FALSE	FALSE
Anogam_AGAP001399	0.499291	0.302178337669409	1.65230708926323	0.0984719648577118	0.202444272538498	Fem.Oenocytes vs Female total carcass cells	Female Oenocytes	1147.63	Female total carcass cells	867.986	Coatomer subunit beta	FALSE	FALSE	FALSE
Anogam_AGAP005728	-0.434704	0.344786507145641	-1.26079301290837	0.207383431825194	0.348603133634859	Fem.Oenocytes vs Female total carcass cells	Female Oenocytes	1147.21	Female total carcass cells	1655.64	puromycin-sensitive aminopeptidase	FALSE	FALSE	FALSE
Anogam_AGAP003164	0.704178	0.692828658487965	1.01638063610058	0.309448163050737	0.461727545516071	Fem.Oenocytes vs Female total carcass cells	Female Oenocytes	1146.36	Female total carcass cells	751.42		FALSE	FALSE	FALSE
Anogam_AGAP007380	-0.686247	0.350410282340992	-1.95841079835191	0.0501818286973621	0.123220655443103	Fem.Oenocytes vs Female total carcass cells	Female Oenocytes	1145.38	Female total carcass cells	1972.41	NADH dehydrogenase (ubiquinone) 1 beta subcomplex 11	FALSE	FALSE	FALSE
Anogam_AGAP010624	0.159984	0.303351201033274	0.527387691027112	0.597924389533729	0.721968651605984	Fem.Oenocytes vs Female total carcass cells	Female Oenocytes	1143.26	Female total carcass cells	1095.43	Developmentally regulated GTP-binding protein	FALSE	FALSE	FALSE
Anogam_AGAP008369	-4.02491	0.445157087166005	-9.04155328352455	1.54461141287182e-19	1.12889028403603e-16	Fem.Oenocytes vs Female total carcass cells	Female Oenocytes	1142.9	Female total carcass cells	19861		FALSE	TRUE	TRUE
Anogam_AGAP000561	0.628826	0.351443890834385	1.78926437464287	0.0735722485739319	0.163650271175755	Fem.Oenocytes vs Female total carcass cells	Female Oenocytes	1142.04	Female total carcass cells	789.397	kinesin family member 5	FALSE	FALSE	FALSE
Anogam_AGAP013178	0.49841	0.314497340272251	1.58478230654281	0.113015803781399	0.224639384045129	Fem.Oenocytes vs Female total carcass cells	Female Oenocytes	1141.06	Female total carcass cells	863.935		FALSE	FALSE	FALSE
Anogam_AGAP005856	0.0430539	0.320126105104363	0.134490556896373	0.893014677757586	0.935284646848156	Fem.Oenocytes vs Female total carcass cells	Female Oenocytes	1139.6	Female total carcass cells	1182.95	nodal modulator 2	FALSE	FALSE	FALSE
Anogam_AGAP000320	0.375475	0.260694744971321	1.44028646690084	0.149786368588287	0.275650022193408	Fem.Oenocytes vs Female total carcass cells	Female Oenocytes	1139.26	Female total carcass cells	938.603	dynein intermediate chain2C cytosolic	FALSE	FALSE	FALSE
Anogam_AGAP007294	0.96996	0.44106839299285	2.19911456014468	0.0278697774821096	0.0791681185999293	Fem.Oenocytes vs Female total carcass cells	Female Oenocytes	1139.08	Female total carcass cells	621.009	IAP1 inhibitor of apoptosis 1	FALSE	FALSE	FALSE
Anogam_AGAP008297	-0.82197	0.289623193956734	-2.83806620881857	0.00453877668155621	0.0191114251052194	Fem.Oenocytes vs Female total carcass cells	Female Oenocytes	1134.26	Female total carcass cells	2144.72	leucyl-tRNA synthetase	FALSE	FALSE	FALSE
Anogam_AGAP002278	0.679152	0.254387332826236	2.66975555391415	0.00759064857125885	0.0286701794688522	Fem.Oenocytes vs Female total carcass cells	Female Oenocytes	1132.79	Female total carcass cells	756.494	ABCB1 ATP-binding cassette transporter (ABC transporter) family B member 1	FALSE	FALSE	FALSE
Anogam_AGAP011764	3.30656	0.809668361136389	4.08384666941775	4.42962649541638e-05	0.000419666095380559	Fem.Oenocytes vs Female total carcass cells	Female Oenocytes	1132.24	Female total carcass cells	122.121		TRUE	FALSE	TRUE
Anogam_AGAP009444	0.174912	0.245538363946235	0.712360470371961	0.476241587217046	0.621306122708761	Fem.Oenocytes vs Female total carcass cells	Female Oenocytes	1130.37	Female total carcass cells	1071.1	chromobox protein 5	FALSE	FALSE	FALSE
Anogam_AGAP000672	-0.881689	0.219906814870997	-4.00937495121564	6.08796822884638e-05	0.000549797801567133	Fem.Oenocytes vs Female total carcass cells	Female Oenocytes	1130.05	Female total carcass cells	2226.49	Obg-like ATPase 1	FALSE	FALSE	FALSE
Anogam_AGAP005824	1.24982	0.324232648916483	3.85470045711183	0.000115871410566118	0.000946961879323097	Fem.Oenocytes vs Female total carcass cells	Female Oenocytes	1129.98	Female total carcass cells	509.038	presqualene diphosphate phosphatase	TRUE	FALSE	TRUE
Anogam_AGAP005406	0.844244	0.444258648271194	1.90034410696637	0.0573879766738729	0.136588457159122	Fem.Oenocytes vs Female total carcass cells	Female Oenocytes	1129.91	Female total carcass cells	672.81	RNA exonuclease 1	FALSE	FALSE	FALSE
Anogam_AGAP011130	-0.503617	0.310786561358538	-1.62046045627447	0.10513340219144	0.213352830468627	Fem.Oenocytes vs Female total carcass cells	Female Oenocytes	1129.43	Female total carcass cells	1713.8	NADH dehydrogenase (ubiquinone) 1 alpha subcomplex 10	FALSE	FALSE	FALSE
Anogam_AGAP000909	0.58968	0.233890958847834	2.52117457620251	0.0116963807314038	0.0402691202496338	Fem.Oenocytes vs Female total carcass cells	Female Oenocytes	1128.12	Female total carcass cells	801.501	endoplasmic reticulum resident protein 44 precursor	FALSE	FALSE	FALSE
Anogam_AGAP003167	-0.6529	0.386640565425935	-1.68864847963315	0.0912868142949929	0.191011591792713	Fem.Oenocytes vs Female total carcass cells	Female Oenocytes	1127.68	Female total carcass cells	1896.05	NAD(P) transhydrogenase	FALSE	FALSE	FALSE
Anogam_AGAP007218	-0.291449	0.281807796428972	-1.03421076295297	0.301037643611673	0.452823651913773	Fem.Oenocytes vs Female total carcass cells	Female Oenocytes	1127.41	Female total carcass cells	1476.7	eukaryotic translation initiation factor 22C subunit 2 beta	FALSE	FALSE	FALSE
Anogam_AGAP006186	0.289659	0.251646758140793	1.15105228401486	0.249710726599761	0.397609734604538	Fem.Oenocytes vs Female total carcass cells	Female Oenocytes	1127.37	Female total carcass cells	986.412	Ca-P60A Calcium-transporting ATPase sarcoplasmic-endoplasmic reticulum type	FALSE	FALSE	FALSE
Anogam_AGAP007310	0.31	0.419183744619966	0.739533353795856	0.459583194128797	0.606690135766462	Fem.Oenocytes vs Female total carcass cells	Female Oenocytes	1126.6	Female total carcass cells	970.421		FALSE	FALSE	FALSE
Anogam_AGAP009950	0.41134	0.369211901668518	1.11410273330539	0.265235116189393	0.413891369353342	Fem.Oenocytes vs Female total carcass cells	Female Oenocytes	1125.83	Female total carcass cells	904.662		FALSE	FALSE	FALSE
Anogam_AGAP008844	1.26038	0.367817664565288	3.42665066522284	0.000611074655051507	0.00378710834069474	Fem.Oenocytes vs Female total carcass cells	Female Oenocytes	1125.15	Female total carcass cells	501.677	GALE1 galectin 1	FALSE	FALSE	FALSE
Anogam_AGAP001257	-2.72529	0.51648264257452	-5.27664059408156	1.31573575934005e-07	2.8114532686765e-06	Fem.Oenocytes vs Female total carcass cells	Female Oenocytes	1124.64	Female total carcass cells	7955.46	UTP--glucose-1-phosphate uridylyltransferase	FALSE	TRUE	TRUE
Anogam_AGAP006096	-0.654896	0.402902104998584	-1.62544653168509	0.104067447919888	0.211735559180015	Fem.Oenocytes vs Female total carcass cells	Female Oenocytes	1124.56	Female total carcass cells	1894.19	SCOT succinyl-CoA transferase	FALSE	FALSE	FALSE
Anogam_AGAP004912	0.273993	0.268815818851356	1.01926016070478	0.308079472212265	0.460050957337405	Fem.Oenocytes vs Female total carcass cells	Female Oenocytes	1123.78	Female total carcass cells	993.277	ATP-dependent RNA helicase DDX5-DBP2	FALSE	FALSE	FALSE
Anogam_AGAP006885	0.203839	0.328242302615305	0.621001363703217	0.534598725916835	0.672410320218658	Fem.Oenocytes vs Female total carcass cells	Female Oenocytes	1122.18	Female total carcass cells	1040.73	pre-mRNA-processing factor 8	FALSE	FALSE	FALSE
Anogam_AGAP010218	0.489099	0.423256110467952	1.15556322224957	0.247859858621106	0.395833006619502	Fem.Oenocytes vs Female total carcass cells	Female Oenocytes	1121.22	Female total carcass cells	854.315	Lkb1 interacting protein	FALSE	FALSE	FALSE
Anogam_AGAP009166	1.02396	0.286783804094055	3.57050329800048	0.000356295967984854	0.00244180867007436	Fem.Oenocytes vs Female total carcass cells	Female Oenocytes	1120.39	Female total carcass cells	589.451	IKK1 IMD pathway signalling IKK-beta). (ird5orthologue immune response deficient 5)	FALSE	FALSE	FALSE
Anogam_AGAP005205	0.824554	0.442681303881152	1.86263639544041	0.0625134401349481	0.145556727102631	Fem.Oenocytes vs Female total carcass cells	Female Oenocytes	1119.05	Female total carcass cells	675.705	PGRPLA peptidoglycan recognition protein (long)	FALSE	FALSE	FALSE
Anogam_AGAP002215	1.72528	0.482389202435594	3.57652144288098	0.000348196767025905	0.00239754328412453	Fem.Oenocytes vs Female total carcass cells	Female Oenocytes	1117.53	Female total carcass cells	361.345		FALSE	FALSE	FALSE
Anogam_AGAP008408	0.705958	0.30491341324629	2.31527295596932	0.0205979988129951	0.0628192917599303	Fem.Oenocytes vs Female total carcass cells	Female Oenocytes	1116.99	Female total carcass cells	732.918		FALSE	FALSE	FALSE
Anogam_AGAP002883	1.17436	0.655282813281791	1.79213799655068	0.0731108637100501	0.162871839207758	Fem.Oenocytes vs Female total carcass cells	Female Oenocytes	1115.34	Female total carcass cells	527.79		FALSE	FALSE	FALSE
Anogam_AGAP009672	-1.00787	0.473331707032175	-2.12931695301749	0.0332280461219909	0.0903266120935735	Fem.Oenocytes vs Female total carcass cells	Female Oenocytes	1114.9	Female total carcass cells	2395.66		FALSE	FALSE	FALSE
Anogam_AGAP004232	1.01926	0.338044488749179	3.01516484186767	0.00256839624506532	0.0120887537161227	Fem.Oenocytes vs Female total carcass cells	Female Oenocytes	1114.19	Female total carcass cells	588.833	pellino	FALSE	FALSE	FALSE
Anogam_AGAP006518	1.20265	0.328834660675911	3.65732065512372	0.000254865467203658	0.00183130860985101	Fem.Oenocytes vs Female total carcass cells	Female Oenocytes	1113.08	Female total carcass cells	517.32	charged multivesicular body protein 1	FALSE	FALSE	FALSE
Anogam_AGAP001073	0.729114	0.274481688516978	2.65633048690327	0.00789961549880112	0.0295529547821511	Fem.Oenocytes vs Female total carcass cells	Female Oenocytes	1112.94	Female total carcass cells	718.381		FALSE	FALSE	FALSE
Anogam_AGAP004880	0.926681	0.56507891914051	1.63991450058771	0.1010229454197	0.206650695228782	Fem.Oenocytes vs Female total carcass cells	Female Oenocytes	1112.1	Female total carcass cells	627.342	L-lactate dehydrogenase	FALSE	FALSE	FALSE
Anogam_AGAP002277	-0.921548	0.250008973325283	-3.68605800242494	0.000227754464126609	0.00166694111369347	Fem.Oenocytes vs Female total carcass cells	Female Oenocytes	1111.84	Female total carcass cells	2251.97	mitochondrial import inner membrane translocase subunit Tim13	FALSE	FALSE	FALSE
Anogam_AGAP007545	0.689596	0.40994736282316	1.68215791029299	0.0925382233569023	0.193037905631939	Fem.Oenocytes vs Female total carcass cells	Female Oenocytes	1109.55	Female total carcass cells	735.539	Contactin associated protein-like 2	FALSE	FALSE	FALSE
Anogam_AGAP001526	-0.432805	0.248620227443068	-1.74082883685691	0.081713585630566	0.176741612719526	Fem.Oenocytes vs Female total carcass cells	Female Oenocytes	1108.48	Female total carcass cells	1600.58	RIO kinase 2	FALSE	FALSE	FALSE
Anogam_AGAP009547	0.894652	0.522473083954543	1.71234037006683	0.0868339611056848	0.184409524705971	Fem.Oenocytes vs Female total carcass cells	Female Oenocytes	1107.56	Female total carcass cells	636.115	torsin A	FALSE	FALSE	FALSE
Anogam_AGAP004261	0.7346	0.432147843650003	1.69988077953206	0.089153352939722	0.187892298100769	Fem.Oenocytes vs Female total carcass cells	Female Oenocytes	1107.2	Female total carcass cells	710.561	CRY2 cryptochrome 2	FALSE	FALSE	FALSE
Anogam_AGAP006652	-0.111785	0.262780325509424	-0.425392721698878	0.670550410905471	0.777811110348575	Fem.Oenocytes vs Female total carcass cells	Female Oenocytes	1107.19	Female total carcass cells	1279.95	ubiquitin carboxyl-terminal hydrolase 10	FALSE	FALSE	FALSE
Anogam_AGAP005375	-0.580812	0.221555806206744	-2.62151429269481	0.00875400915831102	0.0320099621499394	Fem.Oenocytes vs Female total carcass cells	Female Oenocytes	1106.27	Female total carcass cells	1768.96	nonsense-mediated mRNA decay protein	FALSE	FALSE	FALSE
Anogam_AGAP000935	-1.55564	0.371195258233378	-4.19090141157049	2.7784837956443e-05	0.000286298551833157	Fem.Oenocytes vs Female total carcass cells	Female Oenocytes	1105.9	Female total carcass cells	3476.08	mitochondrial processing peptidase	FALSE	TRUE	TRUE
Anogam_AGAP007033	-0.835648	1.47949088994174	-0.564821402984166	NA	NA	Fem.Oenocytes vs Female total carcass cells	Female Oenocytes	1104.94	Female total carcass cells	2104.59	APL1C Anopheles Plasmodium-responsive Leucine-Rich Repeat 1C	FALSE	FALSE	FALSE
Anogam_AGAP003823	0.70856	0.579796885975221	1.22208338440846	0.22167609580204	0.365660134168382	Fem.Oenocytes vs Female total carcass cells	Female Oenocytes	1103.98	Female total carcass cells	721.072	influenza virus NS1A-binding protein	FALSE	FALSE	FALSE
Anogam_AGAP029116	0.799047	0.429873180946924	1.85879737172656	0.0630558651588354	0.146600230017088	Fem.Oenocytes vs Female total carcass cells	Female Oenocytes	1103.59	Female total carcass cells	677.532		FALSE	FALSE	FALSE
Anogam_AGAP009774	1.7517	0.423277726662205	4.13840609159116	3.49726962477054e-05	0.000345739737204369	Fem.Oenocytes vs Female total carcass cells	Female Oenocytes	1102.87	Female total carcass cells	351.082		TRUE	FALSE	TRUE
Anogam_AGAP005935	0.680289	0.286757225585779	2.37235316470207	0.0176751870181425	0.0558080755510193	Fem.Oenocytes vs Female total carcass cells	Female Oenocytes	1101.12	Female total carcass cells	734.198		FALSE	FALSE	FALSE
Anogam_AGAP000076	1.11338	0.482846485975216	2.30587128479534	0.021117825572824	0.0641472340651865	Fem.Oenocytes vs Female total carcass cells	Female Oenocytes	1100.52	Female total carcass cells	542.699	sterol regulatory element-binding transcription factor 1	FALSE	FALSE	FALSE
Anogam_AGAP007208	-0.526045	0.307644194346952	-1.70991205319636	0.0872821372414893	0.185054046468073	Fem.Oenocytes vs Female total carcass cells	Female Oenocytes	1100.18	Female total carcass cells	1695.7	NADH dehydrogenase (ubiquinone) 1 alpha subcomplex 11	FALSE	FALSE	FALSE
Anogam_AGAP005414	0.242886	0.342914614861939	0.708299292395196	0.478759416438639	0.62323999351147	Fem.Oenocytes vs Female total carcass cells	Female Oenocytes	1100.15	Female total carcass cells	994.141	misexpression suppressor of ras 6	FALSE	FALSE	FALSE
Anogam_AGAP010462	0.471312	0.297417951443269	1.58467874997236	0.113039342372819	0.224639384045129	Fem.Oenocytes vs Female total carcass cells	Female Oenocytes	1098.26	Female total carcass cells	847.931	SWI-SNF related2C matrix associated2C actin dependent regulator of chromatin	FALSE	FALSE	FALSE
Anogam_AGAP007864	0.983861	0.367896535949776	2.67428737377741	0.00748882481660182	0.0284009101273053	Fem.Oenocytes vs Female total carcass cells	Female Oenocytes	1096.98	Female total carcass cells	592.478	F-actin capping protein subunit beta	FALSE	FALSE	FALSE
Anogam_AGAP005563	-3.42505	0.657864504862707	-5.20631402596469	1.92628559092691e-07	3.92624584987333e-06	Fem.Oenocytes vs Female total carcass cells	Female Oenocytes	1096.9	Female total carcass cells	12573.9	Tret1 Facilitated trehalose transporter Tret1	FALSE	TRUE	TRUE
Anogam_AGAP003545	-1.89473	0.892026900455157	-2.1240754706972	NA	NA	Fem.Oenocytes vs Female total carcass cells	Female Oenocytes	1095.82	Female total carcass cells	4334.92	Osk protein oskar	FALSE	FALSE	FALSE
Anogam_AGAP004142	-0.923008	0.382456748206469	-2.41336496297465	0.0158059836670537	0.051228009148335	Fem.Oenocytes vs Female total carcass cells	Female Oenocytes	1095.15	Female total carcass cells	2223.55	aspartate aminotransferase2C cytoplasmic	FALSE	FALSE	FALSE
Anogam_AGAP006963	0.64643	0.29356335003622	2.2020120347577	0.0276644583743807	0.0787232618230367	Fem.Oenocytes vs Female total carcass cells	Female Oenocytes	1094.73	Female total carcass cells	748.602	mitochondrial carrier homolog 1	FALSE	FALSE	FALSE
Anogam_AGAP007960	0.699547	0.289760481630457	2.41422480067933	0.0157687300297344	0.0511353151884394	Fem.Oenocytes vs Female total carcass cells	Female Oenocytes	1092.95	Female total carcass cells	719.511		FALSE	FALSE	FALSE
Anogam_AGAP008232	3.53267	0.665856327813494	5.30545076846684	1.1239490054165e-07	2.46257949109671e-06	Fem.Oenocytes vs Female total carcass cells	Female Oenocytes	1090.17	Female total carcass cells	100.87		TRUE	FALSE	TRUE
Anogam_AGAP004417	0.51517	0.339575950408085	1.51709673494086	0.129242262494103	0.24843261879385	Fem.Oenocytes vs Female total carcass cells	Female Oenocytes	1089.98	Female total carcass cells	816.136	zinc finger protein	FALSE	FALSE	FALSE
Anogam_AGAP009187	1.24861	0.525517536169342	2.37595369632196	0.017503659161677	0.0554481240068975	Fem.Oenocytes vs Female total carcass cells	Female Oenocytes	1089.78	Female total carcass cells	491.335	Indanol dehydrogenase	FALSE	FALSE	FALSE
Anogam_AGAP009438	-0.725683	0.254803221382538	-2.84801228037053	0.00439932269495617	0.0186702073060106	Fem.Oenocytes vs Female total carcass cells	Female Oenocytes	1088.77	Female total carcass cells	1924.82	pre-rRNA-processing protein TSR1	FALSE	FALSE	FALSE
Anogam_AGAP007024	0.539705	0.365751862290641	1.47560374624289	0.140050298860454	0.263369722098909	Fem.Oenocytes vs Female total carcass cells	Female Oenocytes	1088.51	Female total carcass cells	800.388	nuclear transport factor 2	FALSE	FALSE	FALSE
Anogam_AGAP006023	-2.29596	0.351845755810742	-6.52545894898501	6.77936244181097e-11	3.81134266508845e-09	Fem.Oenocytes vs Female total carcass cells	Female Oenocytes	1088.17	Female total carcass cells	5701.89	tyrosine 3-monooxygenase	FALSE	TRUE	TRUE
Anogam_AGAP000999	-1.14173	0.282474825839358	-4.04189299258412	5.30214288715326e-05	0.000489193201274591	Fem.Oenocytes vs Female total carcass cells	Female Oenocytes	1085.58	Female total carcass cells	2562.01	TOLL5A TOLL-like receptor 5A	FALSE	TRUE	TRUE
Anogam_AGAP010235	0.813896	0.35883141419201	2.26818521708852	0.0233179200875409	0.0691161524726879	Fem.Oenocytes vs Female total carcass cells	Female Oenocytes	1084.67	Female total carcass cells	659.735	TBC1 domain family member 24	FALSE	FALSE	FALSE
Anogam_AGAP012445	1.86259	0.670796570972728	2.77667786754619	0.00549175776257205	0.0222861698236321	Fem.Oenocytes vs Female total carcass cells	Female Oenocytes	1084.15	Female total carcass cells	318.397	phosphatidate phosphatase	FALSE	FALSE	FALSE
Anogam_AGAP012513	-0.0834814	0.368295936119511	-0.226669247698161	0.820680941510021	0.88690769159835	Fem.Oenocytes vs Female total carcass cells	Female Oenocytes	1084.03	Female total carcass cells	1229.7	Hydroxysteroid dehydrogenase-like protein 2	FALSE	FALSE	FALSE
Anogam_AGAP010229	0.1265	0.359465033026297	0.351910487791756	0.724905393574951	0.817891196511353	Fem.Oenocytes vs Female total carcass cells	Female Oenocytes	1082.93	Female total carcass cells	1062.06	beta-ureidopropionase	FALSE	FALSE	FALSE
Anogam_AGAP029118	2.55322	0.526931059250798	4.8454589066901	1.26319356482121e-06	2.00698704274078e-05	Fem.Oenocytes vs Female total carcass cells	Female Oenocytes	1080.95	Female total carcass cells	197.266		TRUE	FALSE	TRUE
Anogam_AGAP009852	0.680505	0.39349530541133	1.72938541150968	0.0837401392201278	0.179892736615651	Fem.Oenocytes vs Female total carcass cells	Female Oenocytes	1077.65	Female total carcass cells	719.755	mitochondrial fission 1 protein	FALSE	FALSE	FALSE
Anogam_AGAP004684	0.451779	0.335809067027487	1.34534366027923	0.178514280243239	0.313357027869071	Fem.Oenocytes vs Female total carcass cells	Female Oenocytes	1077.63	Female total carcass cells	844.066	rRNA-processing protein CGR1	FALSE	FALSE	FALSE
Anogam_AGAP005133	1.67562	0.64563093569095	2.59531512361563	0.00945042290971414	0.0339883048197522	Fem.Oenocytes vs Female total carcass cells	Female Oenocytes	1076.93	Female total carcass cells	359.564		FALSE	FALSE	FALSE
Anogam_AGAP013510	1.80748	0.32315154964211	5.59327721838054	2.22823084487646e-08	6.04754854238089e-07	Fem.Oenocytes vs Female total carcass cells	Female Oenocytes	1076.73	Female total carcass cells	329.562		TRUE	FALSE	TRUE
Anogam_AGAP004610	0.215908	0.279273351850987	0.773104777272798	0.439460374058316	0.587785431028064	Fem.Oenocytes vs Female total carcass cells	Female Oenocytes	1074.98	Female total carcass cells	990.757	signal recognition particle subunit SRP54	FALSE	FALSE	FALSE
Anogam_AGAP003052	-0.181084	0.279058605332277	-0.648910701183635	0.516396097448971	0.655635298312181	Fem.Oenocytes vs Female total carcass cells	Female Oenocytes	1074.87	Female total carcass cells	1302.97	small glutamine-rich tetratricopeptide repeat-containing protein alpha	FALSE	FALSE	FALSE
Anogam_AGAP007112	-0.579734	0.282766310046556	-2.05022437083265	0.040342540834567	0.104847568661237	Fem.Oenocytes vs Female total carcass cells	Female Oenocytes	1074.68	Female total carcass cells	1719.09	Pescadillo homolog	FALSE	FALSE	FALSE
Anogam_AGAP004884	-1.00636	0.325590948616818	-3.09086257347027	0.00199575979732407	0.00984125987769632	Fem.Oenocytes vs Female total carcass cells	Female Oenocytes	1074.53	Female total carcass cells	2308.22	muskelin	FALSE	FALSE	FALSE
Anogam_AGAP002482	0.770302	0.352462857539887	2.1854838119144	0.0288533916074297	0.0811541915277806	Fem.Oenocytes vs Female total carcass cells	Female Oenocytes	1074.07	Female total carcass cells	673.453	lysophosphatidylglycerol acyltransferase 1	FALSE	FALSE	FALSE
Anogam_AGAP010891	0.51104	0.257072211021219	1.98792470609647	0.0468200178673481	0.117273542917676	Fem.Oenocytes vs Female total carcass cells	Female Oenocytes	1073.37	Female total carcass cells	805.829	ariadne-1	FALSE	FALSE	FALSE
Anogam_AGAP004541	-0.000464981	0.264589102840384	-0.00175736914191423	0.99859782301577	0.999090357573296	Fem.Oenocytes vs Female total carcass cells	Female Oenocytes	1072.97	Female total carcass cells	1147.38		FALSE	FALSE	FALSE
Anogam_AGAP005618	1.08646	0.348753313373185	3.11525458051161	0.00183786214413304	0.00925443182026045	Fem.Oenocytes vs Female total carcass cells	Female Oenocytes	1070.81	Female total carcass cells	540.216	12C2-dihydroxy-3-keto-5-methylthiopentene dioxygenase	FALSE	FALSE	FALSE
Anogam_AGAP010251	1.48164	0.452368405954834	3.27529590541746	0.00105551351326277	0.00591133785862326	Fem.Oenocytes vs Female total carcass cells	Female Oenocytes	1070.72	Female total carcass cells	410.699	coatomer protein complex2C subunit alpha (xenin)	FALSE	FALSE	FALSE
Anogam_AGAP009901	0.849373	0.413495168111371	2.05412932785526	0.0399631762020049	0.104152628349189	Fem.Oenocytes vs Female total carcass cells	Female Oenocytes	1069.95	Female total carcass cells	634.475	diphosphoinositol-polyphosphate diphosphatase	FALSE	FALSE	FALSE
Anogam_AGAP008364	-2.09841	0.651542355582343	-3.22068130733638	0.00127886271930314	0.00690518382264368	Fem.Oenocytes vs Female total carcass cells	Female Oenocytes	1069.88	Female total carcass cells	4893.69	TEP15 thioester-containing protein 15	FALSE	FALSE	FALSE
Anogam_AGAP002036	1.86795	0.495481469412007	3.76996248002627	0.000163272091175911	0.00126464802188639	Fem.Oenocytes vs Female total carcass cells	Female Oenocytes	1069.62	Female total carcass cells	313.113	zinc finger2C FYVE domain containing 1	FALSE	FALSE	FALSE
Anogam_AGAP001464	0.62583	0.337502724998176	1.85429505034407	0.0636969598708177	0.147550271497786	Fem.Oenocytes vs Female total carcass cells	Female Oenocytes	1068.72	Female total carcass cells	740.278	cyclic AMP-responsive element-binding protein 3	FALSE	FALSE	FALSE
Anogam_AGAP004065	-0.409193	0.512084322980758	-0.79907295479924	0.424248110638144	0.574345947082494	Fem.Oenocytes vs Female total carcass cells	Female Oenocytes	1068.18	Female total carcass cells	1518.5	hemomucin	FALSE	FALSE	FALSE
Anogam_AGAP001595	-0.993097	0.316237517557095	-3.14035031544295	0.00168745916447844	0.00862011091909307	Fem.Oenocytes vs Female total carcass cells	Female Oenocytes	1067.45	Female total carcass cells	2272.5	RpS29 40S ribosomal protein S29	FALSE	FALSE	FALSE
Anogam_AGAP004376	3.25204	0.501034314735534	6.49065437200629	8.54643429677727e-11	4.65144232577793e-09	Fem.Oenocytes vs Female total carcass cells	Female Oenocytes	1065.96	Female total carcass cells	120.116	aldose 1-epimerase	TRUE	FALSE	TRUE
Anogam_AGAP002536	4.96558	1.12327015422296	4.42064758027588	9.84055513071431e-06	0.000119440759308978	Fem.Oenocytes vs Female total carcass cells	Female Oenocytes	1065.1	Female total carcass cells	36.3923		TRUE	FALSE	TRUE
Anogam_AGAP005838	2.84727	0.960225078194073	2.96520973903669	NA	NA	Fem.Oenocytes vs Female total carcass cells	Female Oenocytes	1064.38	Female total carcass cells	157.576		FALSE	FALSE	FALSE
Anogam_AGAP009617	1.73725	0.65403307229183	2.65621362102802	0.00790235381977769	0.0295529547821511	Fem.Oenocytes vs Female total carcass cells	Female Oenocytes	1063.83	Female total carcass cells	341.781	fatty-acid amide hydrolase 2	FALSE	FALSE	FALSE
Anogam_AGAP006942	-0.458099	0.306093798973678	-1.49659553319962	0.13449853311452	0.255654651834994	Fem.Oenocytes vs Female total carcass cells	Female Oenocytes	1061.96	Female total carcass cells	1559.79	Importin-4	FALSE	FALSE	FALSE
Anogam_AGAP010837	0.570618	0.23525670962456	2.4255118723078	0.0152868157353797	0.049805699239514	Fem.Oenocytes vs Female total carcass cells	Female Oenocytes	1061.52	Female total carcass cells	764.195	mitogen-activated protein kinase kinase kinase kinase 5	FALSE	FALSE	FALSE
Anogam_AGAP005916	0.431208	0.272054753773286	1.58500567353113	0.11296504522123	0.224639384045129	Fem.Oenocytes vs Female total carcass cells	Female Oenocytes	1061.41	Female total carcass cells	842.438	ubiquitin-conjugating enzyme E2 M	FALSE	FALSE	FALSE
Anogam_AGAP005934	0.973471	0.318930492718487	3.0522969033336	0.00227097352712058	0.0109554932246571	Fem.Oenocytes vs Female total carcass cells	Female Oenocytes	1061.39	Female total carcass cells	577.694	Tumor susceptibility 101 protein	FALSE	FALSE	FALSE
Anogam_AGAP009701	-1.28631	0.368378783413645	-3.49181538707599	0.000479749710153453	0.00311077251856155	Fem.Oenocytes vs Female total carcass cells	Female Oenocytes	1059.48	Female total carcass cells	2764.33	Aats-ala alanyl-tRNA synthetase	FALSE	FALSE	FALSE
Anogam_AGAP001306	0.849372	0.338632776844038	2.50823967267528	0.0121334337168018	0.0414117295909234	Fem.Oenocytes vs Female total carcass cells	Female Oenocytes	1058.9	Female total carcass cells	628.227	actin related protein 2-3 complex2C subunit 4	FALSE	FALSE	FALSE
Anogam_AGAP007520	1.78417	0.592522692496377	3.01113926191256	0.00260269454287162	0.0122215560177432	Fem.Oenocytes vs Female total carcass cells	Female Oenocytes	1058.07	Female total carcass cells	329.124	Peroxisomal membrane protein PMP34	FALSE	FALSE	FALSE
Anogam_AGAP004296	0.917326	0.272744898759571	3.363311000145	0.000770135500563853	0.00457874865878521	Fem.Oenocytes vs Female total carcass cells	Female Oenocytes	1057.65	Female total carcass cells	598.778	signal peptidase complex subunit 1	FALSE	FALSE	FALSE
Anogam_AGAP008502	1.02435	0.312969523007817	3.27298952946239	0.0010641641960743	0.005940277170885	Fem.Oenocytes vs Female total carcass cells	Female Oenocytes	1057.33	Female total carcass cells	556.774	L-xylulose reductase	FALSE	FALSE	FALSE
Anogam_AGAP003112	0.291028	0.305307481233175	0.953228804251718	0.340474155146961	0.493586222083268	Fem.Oenocytes vs Female total carcass cells	Female Oenocytes	1057.03	Female total carcass cells	924.974	vesicle transport through interaction with t-SNAREs 1	FALSE	FALSE	FALSE
Anogam_AGAP006128	-0.72549	0.236895135271495	-3.06249552556358	0.00219499757028034	0.0106391355467117	Fem.Oenocytes vs Female total carcass cells	Female Oenocytes	1056.86	Female total carcass cells	1868.5	protein AIR1-2	FALSE	FALSE	FALSE
Anogam_AGAP008061	-2.65817	0.506838572476645	-5.24460848791085	1.56614531462737e-07	3.26370648864914e-06	Fem.Oenocytes vs Female total carcass cells	Female Oenocytes	1056.74	Female total carcass cells	7115.58	IDGF4 imaginal disc growth factor 4	FALSE	TRUE	TRUE
Anogam_AGAP002419	0.526132	0.428175685410935	1.22877578115236	0.219155884318464	0.363024608765828	Fem.Oenocytes vs Female total carcass cells	Female Oenocytes	1056.69	Female total carcass cells	786.044	CYP4D22 cytochrome P450	FALSE	FALSE	FALSE
Anogam_AGAP002340	-0.442239	0.275955772058295	-1.60257359989194	0.109028826199149	0.218572008717839	Fem.Oenocytes vs Female total carcass cells	Female Oenocytes	1055.79	Female total carcass cells	1533.02	eIF3a Eukaryotic translation initiation factor 3 subunit A	FALSE	FALSE	FALSE
Anogam_AGAP001802	-0.533143	0.231015014937482	-2.30782756185011	0.0210087293043299	0.0638625425555269	Fem.Oenocytes vs Female total carcass cells	Female Oenocytes	1055.6	Female total carcass cells	1633.47	mitofusin	FALSE	FALSE	FALSE
Anogam_AGAP008852	2.61648	0.36781709569423	7.11353179243945	1.13110414855106e-12	1.14588689583905e-10	Fem.Oenocytes vs Female total carcass cells	Female Oenocytes	1053.73	Female total carcass cells	184.379		TRUE	FALSE	TRUE
Anogam_AGAP004812	0.447962	0.3528653870782	1.26949718023581	0.204263795602566	0.344604642474107	Fem.Oenocytes vs Female total carcass cells	Female Oenocytes	1052.75	Female total carcass cells	825.46	calcium-independent phospholipase A2	FALSE	FALSE	FALSE
Anogam_AGAP001492	0.902829	0.433719579491782	2.08159537932002	0.0373794438307321	0.0990845775326555	Fem.Oenocytes vs Female total carcass cells	Female Oenocytes	1049.89	Female total carcass cells	601.228		FALSE	FALSE	FALSE
Anogam_AGAP010308	-0.720786	0.28171259170699	-2.55858469476489	0.010509921538167	0.0369544732572251	Fem.Oenocytes vs Female total carcass cells	Female Oenocytes	1049.33	Female total carcass cells	1848.03	nucleolar complex protein 3	FALSE	FALSE	FALSE
Anogam_AGAP001057	-0.649055	0.301317989384382	-2.15405220911633	0.0312360777984703	0.086147587071145	Fem.Oenocytes vs Female total carcass cells	Female Oenocytes	1048.94	Female total carcass cells	1757.14	ATP-dependent RNA helicase DDX10-DBP4	FALSE	FALSE	FALSE
Anogam_AGAP008503	0.30895	0.246490232712863	1.25339523815056	0.210061903595551	0.351833916776833	Fem.Oenocytes vs Female total carcass cells	Female Oenocytes	1047.74	Female total carcass cells	904.381		FALSE	FALSE	FALSE
Anogam_AGAP007919	0.44951	0.219752165270391	2.04553292266097	0.0408023468489987	0.105747115744416	Fem.Oenocytes vs Female total carcass cells	Female Oenocytes	1046.24	Female total carcass cells	819.007		FALSE	FALSE	FALSE
Anogam_AGAP004320	1.60974	0.49046997312296	3.28204292306184	0.00103057916174208	0.00581305732246137	Fem.Oenocytes vs Female total carcass cells	Female Oenocytes	1045.98	Female total carcass cells	366.124	Dedicator of cytokinesis protein 1	FALSE	FALSE	FALSE
Anogam_AGAP010191	1.42771	0.288234854155121	4.95327342205377	7.29753202499761e-07	1.26771388250892e-05	Fem.Oenocytes vs Female total carcass cells	Female Oenocytes	1044.32	Female total carcass cells	415.582	calumenin isoform b precursor	TRUE	FALSE	TRUE
Anogam_AGAP003576	-0.41733	0.281154630369194	-1.4843418509263	0.137718252839846	0.260131652770409	Fem.Oenocytes vs Female total carcass cells	Female Oenocytes	1041.92	Female total carcass cells	1486.19	transportin-3	FALSE	FALSE	FALSE
Anogam_AGAP004990	-0.0984797	0.368416744009462	-0.267305290982282	0.789234113327928	0.864101760804794	Fem.Oenocytes vs Female total carcass cells	Female Oenocytes	1039.26	Female total carcass cells	1190.55	mbf1 multiprotein bridging factor 1	FALSE	FALSE	FALSE
Anogam_AGAP011988	0.775312	0.341739347928031	2.26872382029401	0.0232851261103048	0.0690389482354793	Fem.Oenocytes vs Female total carcass cells	Female Oenocytes	1038.52	Female total carcass cells	649.878	Protein kinase C	FALSE	FALSE	FALSE
Anogam_AGAP001380	-0.676133	0.321784875362615	-2.10119486812927	0.0356238637174797	0.0954947271567335	Fem.Oenocytes vs Female total carcass cells	Female Oenocytes	1038.42	Female total carcass cells	1775.7	translation initiation factor 6	FALSE	FALSE	FALSE
Anogam_AGAP006780	0.084765	0.377099111413456	0.224781623876818	0.822149162300294	0.887646958811503	Fem.Oenocytes vs Female total carcass cells	Female Oenocytes	1037.43	Female total carcass cells	1046.62	isovaleryl-CoA dehydrogenase	FALSE	FALSE	FALSE
Anogam_AGAP006826	3.85979	0.651125502674677	5.92787705621804	3.06876109871708e-09	1.08649008865305e-07	Fem.Oenocytes vs Female total carcass cells	Female Oenocytes	1036.99	Female total carcass cells	76.4281	Integrin alpha-ps	TRUE	FALSE	TRUE
Anogam_AGAP010477	0.832372	0.347757816687169	2.39353815735921	0.0166867455423446	0.0533892371448623	Fem.Oenocytes vs Female total carcass cells	Female Oenocytes	1036.92	Female total carcass cells	623.124	phosducin-like 3	FALSE	FALSE	FALSE
Anogam_AGAP005095	-1.93284	0.864260121176744	-2.23641402363617	0.0253246633763542	0.0736979396094586	Fem.Oenocytes vs Female total carcass cells	Female Oenocytes	1034.38	Female total carcass cells	4204.48	actin beta-gamma 1	FALSE	FALSE	FALSE
Anogam_AGAP001411	0.0153211	0.357037118937971	0.0429116488339206	0.965771962878444	0.981016452315322	Fem.Oenocytes vs Female total carcass cells	Female Oenocytes	1034.37	Female total carcass cells	1094.3	BCL2-adenovirus E1B 19 kDa protein-interacting protein 3	FALSE	FALSE	FALSE
Anogam_AGAP002630	-1.1394	0.294794399557271	-3.86506505864588	0.000111059592515584	0.000915682313150246	Fem.Oenocytes vs Female total carcass cells	Female Oenocytes	1033.43	Female total carcass cells	2434.62	NADH dehydrogenase (ubiquinone) 1 beta subcomplex 2	FALSE	TRUE	TRUE
Anogam_AGAP010937	1.39579	0.35005788362652	3.9873052749311	6.68280138622272e-05	0.000596670364605854	Fem.Oenocytes vs Female total carcass cells	Female Oenocytes	1033.13	Female total carcass cells	420.125	solute carrier family 31 (copper transporters)2C member 1	TRUE	FALSE	TRUE
Anogam_AGAP008345	-0.488148	0.279621435523054	-1.74574654552835	0.0808550031948342	0.17544151425986	Fem.Oenocytes vs Female total carcass cells	Female Oenocytes	1033.03	Female total carcass cells	1550.7	methionyl aminopeptidase	FALSE	FALSE	FALSE
Anogam_AGAP002684	-0.863474	0.248652091915323	-3.47262009445033	0.000515404361201076	0.00330013605995583	Fem.Oenocytes vs Female total carcass cells	Female Oenocytes	1030.93	Female total carcass cells	2006.55	ribosomal RNA-processing protein 1	FALSE	FALSE	FALSE
Anogam_AGAP000913	0.347237	0.333248173298416	1.04197789645757	0.297421926880603	0.448654158313774	Fem.Oenocytes vs Female total carcass cells	Female Oenocytes	1029.08	Female total carcass cells	863.819	G protein-coupled receptor 107	FALSE	FALSE	FALSE
Anogam_AGAP005617	0.407419	0.328648554461179	1.23968046406185	0.215093605779936	0.357734454485446	Fem.Oenocytes vs Female total carcass cells	Female Oenocytes	1028.98	Female total carcass cells	830.02		FALSE	FALSE	FALSE
Anogam_AGAP011893	1.11262	0.614853321007401	1.80956256065275	0.0703636502779117	0.158546767153401	Fem.Oenocytes vs Female total carcass cells	Female Oenocytes	1028.95	Female total carcass cells	507.705	Potentail helicase MOV-10	FALSE	FALSE	FALSE
Anogam_AGAP002149	-0.620554	0.469668595203344	-1.32125975755862	0.18641476720799	0.322904333514839	Fem.Oenocytes vs Female total carcass cells	Female Oenocytes	1027.93	Female total carcass cells	1688.6		FALSE	FALSE	FALSE
Anogam_AGAP003028	0.861949	0.302026685190716	2.85388213692172	0.00431885511562827	0.0183668019713668	Fem.Oenocytes vs Female total carcass cells	Female Oenocytes	1026.75	Female total carcass cells	603.975	Ras-related protein Rab-35	FALSE	FALSE	FALSE
Anogam_AGAP003793	0.581519	0.521526983304073	1.11503223673957	0.264836607693155	0.413332545746853	Fem.Oenocytes vs Female total carcass cells	Female Oenocytes	1025.94	Female total carcass cells	734.838		FALSE	FALSE	FALSE
Anogam_AGAP007365	-2.78479	0.778915227212248	-3.57521630456396	0.000349938454902548	0.00240629722484064	Fem.Oenocytes vs Female total carcass cells	Female Oenocytes	1024.04	Female total carcass cells	7517.39		FALSE	FALSE	FALSE
Anogam_AGAP012800	2.10663	0.469734798960858	4.48471581231822	7.30111772081358e-06	9.24567283655502e-05	Fem.Oenocytes vs Female total carcass cells	Female Oenocytes	1023.86	Female total carcass cells	254.681		TRUE	FALSE	TRUE
Anogam_AGAP004867	0.689894	0.292818881005872	2.35604368635551	0.0184707453130662	0.0578136023381135	Fem.Oenocytes vs Female total carcass cells	Female Oenocytes	1023.17	Female total carcass cells	679.187	V-type H+-transporting ATPase subunit G	FALSE	FALSE	FALSE
Anogam_AGAP004609	0.194142	0.334309378401217	0.580725495668962	0.561425475581914	0.692025715715473	Fem.Oenocytes vs Female total carcass cells	Female Oenocytes	1021.93	Female total carcass cells	955.565	protein kinase C substrate 80K-H	FALSE	FALSE	FALSE
Anogam_AGAP010494	1.15342	0.311345622739402	3.7046217532426	0.000211706403200207	0.00156177355266367	Fem.Oenocytes vs Female total carcass cells	Female Oenocytes	1020.87	Female total carcass cells	490.461	partitioning defective protein 6	FALSE	FALSE	FALSE
Anogam_AGAP002729	1.86692	0.458168599861618	4.07475170001952	4.60634684667976e-05	0.00043319982477231	Fem.Oenocytes vs Female total carcass cells	Female Oenocytes	1020.38	Female total carcass cells	298.565	Ras GTPase-activating protein 1	TRUE	FALSE	TRUE
Anogam_AGAP004435	1.05048	0.427423938647388	2.4577067659537	0.0139827293274462	0.0463455680629902	Fem.Oenocytes vs Female total carcass cells	Female Oenocytes	1019.31	Female total carcass cells	527.52		FALSE	FALSE	FALSE
Anogam_AGAP012432	1.04792	0.360505343916041	2.90680217686574	0.00365144035522833	0.0160418796542277	Fem.Oenocytes vs Female total carcass cells	Female Oenocytes	1018.29	Female total carcass cells	527.585	Golgi apparatus membrane protein TVP23 homolog (Fragment)	FALSE	FALSE	FALSE
Anogam_AGAP008895	0.959946	0.363954634988135	2.63754314492612	0.00835090017284415	0.030802599339777	Fem.Oenocytes vs Female total carcass cells	Female Oenocytes	1017.38	Female total carcass cells	559.14	actin related protein 2-3 complex2C subunit 5	FALSE	FALSE	FALSE
Anogam_AGAP005624	1.13704	0.338876593184912	3.35532005527835	0.000792732110501938	0.00468045871590065	Fem.Oenocytes vs Female total carcass cells	Female Oenocytes	1015.44	Female total carcass cells	494.606	mitochondrial inner membrane protein COX18	FALSE	FALSE	FALSE
Anogam_AGAP008887	1.30657	0.340193741620912	3.84067220994829	0.000122697862166263	0.000994017835063505	Fem.Oenocytes vs Female total carcass cells	Female Oenocytes	1015.08	Female total carcass cells	438.95	hepatocyte growth factor-regulated tyrosine kinase substrate	TRUE	FALSE	TRUE
Anogam_AGAP009072	-0.23156	0.296688114283112	-0.780481915991054	0.435107267888784	0.584024342783423	Fem.Oenocytes vs Female total carcass cells	Female Oenocytes	1014.42	Female total carcass cells	1274.48	NADH dehydrogenase (ubiquinone) Fe-S protein 6	FALSE	FALSE	FALSE
Anogam_AGAP013301	0.0577084	0.384560464533689	0.150063299656005	0.880714674684746	0.92776566700478	Fem.Oenocytes vs Female total carcass cells	Female Oenocytes	1013.62	Female total carcass cells	1041.32		FALSE	FALSE	FALSE
Anogam_AGAP004710	-0.243372	0.348369363216029	-0.698603868542568	0.484799625427728	0.628225654429649	Fem.Oenocytes vs Female total carcass cells	Female Oenocytes	1013.22	Female total carcass cells	1283.67	ubiquinol-cytochrome c reductase subunit 9	FALSE	FALSE	FALSE
Anogam_AGAP003735	1.29437	0.476673528196697	2.71541583302487	0.00661925993069943	0.025742405021253	Fem.Oenocytes vs Female total carcass cells	Female Oenocytes	1013.08	Female total carcass cells	441.906		FALSE	FALSE	FALSE
Anogam_AGAP007565	-0.78713	0.386201351746903	-2.03813412120482	0.041536521622141	0.107350767678138	Fem.Oenocytes vs Female total carcass cells	Female Oenocytes	1012.78	Female total carcass cells	1871.58	chaperone DnaJ protein	FALSE	FALSE	FALSE
Anogam_AGAP011717	0.526491	0.328439976843529	1.60300531807344	0.108933479982533	0.218507619521913	Fem.Oenocytes vs Female total carcass cells	Female Oenocytes	1012.16	Female total carcass cells	751.306	Argonaute 4	FALSE	FALSE	FALSE
Anogam_AGAP008863	-1.05682	0.427980119022568	-2.46932599012393	0.0135367837370528	0.045190333180269	Fem.Oenocytes vs Female total carcass cells	Female Oenocytes	1009.93	Female total carcass cells	2246.71	for protein kinase2C cGMP-dependent	FALSE	FALSE	FALSE
Anogam_AGAP008802	-1.43749	0.440623800054908	-3.26240465485059	0.00110471327316544	0.00612984067843208	Fem.Oenocytes vs Female total carcass cells	Female Oenocytes	1009.25	Female total carcass cells	2923.16	Pgk Phosphoglycerate kinase	FALSE	FALSE	FALSE
Anogam_AGAP003074	-0.704087	0.373792421071427	-1.88363070481391	0.0596149455682376	0.140257558761602	Fem.Oenocytes vs Female total carcass cells	Female Oenocytes	1008.42	Female total carcass cells	1755.92	SLC25A10 mitochondrial dicarboxylate transporter (solute carrier family 25)	FALSE	FALSE	FALSE
Anogam_AGAP004246	1.23488	0.406649553558882	3.03670976470526	0.00239175627807674	0.0114250467961164	Fem.Oenocytes vs Female total carcass cells	Female Oenocytes	1008.09	Female total carcass cells	457.885	Receptor protein-tyrosine phosphatase 10d	FALSE	FALSE	FALSE
Anogam_AGAP002393	1.37417	0.442417034520752	3.10605074967135	0.00189604171872259	0.00947011374270345	Fem.Oenocytes vs Female total carcass cells	Female Oenocytes	1008.03	Female total carcass cells	415.776	solute carrier family 35 (GDP-fucose transporter)2C member C1	FALSE	FALSE	FALSE
Anogam_AGAP001621	-0.555702	0.373110339163119	-1.48937778668251	0.136387914600029	0.258286348729871	Fem.Oenocytes vs Female total carcass cells	Female Oenocytes	1007.99	Female total carcass cells	1584.94	proline synthetase co-transcribed homolog	FALSE	FALSE	FALSE
Anogam_AGAP005197	0.290335	0.287583562450795	1.00956611771133	0.312703209547088	0.465325660280077	Fem.Oenocytes vs Female total carcass cells	Female Oenocytes	1006.84	Female total carcass cells	881.502	ubiquitin-conjugating enzyme E2 N	FALSE	FALSE	FALSE
Anogam_AGAP009447	-2.3602	0.479592164090262	-4.92127424187347	8.59825462884804e-07	1.45177130961012e-05	Fem.Oenocytes vs Female total carcass cells	Female Oenocytes	1006.25	Female total carcass cells	5513.58	S-adenosylmethionine synthetase	FALSE	TRUE	TRUE
Anogam_AGAP006726	2.94027	0.466513766556638	6.30264106872705	2.92616000627988e-10	1.39908734505868e-08	Fem.Oenocytes vs Female total carcass cells	Female Oenocytes	1005.66	Female total carcass cells	140.707	COEAE5G carboxylesterase	TRUE	FALSE	TRUE
Anogam_AGAP003492	-1.44834	0.336367007444231	-4.30583765436437	1.66355029823128e-05	0.000186843541728896	Fem.Oenocytes vs Female total carcass cells	Female Oenocytes	1005.23	Female total carcass cells	2934.62	facilitated glucose transporter (solute carrier family 2)	FALSE	TRUE	TRUE
Anogam_AGAP007523	0.249297	0.39907909052372	0.624681255773432	0.53218027776125	0.670517005547729	Fem.Oenocytes vs Female total carcass cells	Female Oenocytes	1004.99	Female total carcass cells	903.622	myosin heavy chain	FALSE	FALSE	FALSE
Anogam_AGAP007583	0.676769	0.507807057484296	1.33272957016133	0.182620565662393	0.318423733664727	Fem.Oenocytes vs Female total carcass cells	Female Oenocytes	1004.94	Female total carcass cells	672.931	golgi-associated plant pathogenesis-related protein 1	FALSE	FALSE	FALSE
Anogam_AGAP004440	-0.241053	0.315027697536439	-0.765179387040928	0.444164732308606	0.591218100817179	Fem.Oenocytes vs Female total carcass cells	Female Oenocytes	1002.86	Female total carcass cells	1268.57	spectrin beta	FALSE	FALSE	FALSE
Anogam_AGAP007847	2.45555	0.644149897241428	3.81208590182012	0.00013779896625027	0.00109639115293372	Fem.Oenocytes vs Female total carcass cells	Female Oenocytes	1002.72	Female total carcass cells	194.949	dual specificity tyrosine-phosphorylation-regulated kinase	FALSE	FALSE	FALSE
Anogam_AGAP009170	1.67238	0.436452765773969	3.83174358715258	0.000127238312174319	0.0010259278251912	Fem.Oenocytes vs Female total carcass cells	Female Oenocytes	1001.98	Female total carcass cells	335.76		FALSE	FALSE	FALSE
Anogam_AGAP010909	0.736874	0.306565014568304	2.40364710046445	0.0162324348294881	0.052278965431326	Fem.Oenocytes vs Female total carcass cells	Female Oenocytes	1001.42	Female total carcass cells	642.56		FALSE	FALSE	FALSE
Anogam_AGAP012439	0.0686507	0.294943929739913	0.232758328783451	0.815949073025345	0.883750493828234	Fem.Oenocytes vs Female total carcass cells	Female Oenocytes	1001.36	Female total carcass cells	1021.5		FALSE	FALSE	FALSE
Anogam_AGAP007552	-0.974033	0.232617748737888	-4.18726721729879	2.82333349792217e-05	0.000290071663608549	Fem.Oenocytes vs Female total carcass cells	Female Oenocytes	999.734	Female total carcass cells	2099.45		FALSE	FALSE	FALSE
Anogam_AGAP008001	-1.13573	0.308463149591306	-3.68190418602566	0.0002314984176281	0.0016883049245693	Fem.Oenocytes vs Female total carcass cells	Female Oenocytes	999.271	Female total carcass cells	2346.75	RpS27a 40S ribosomal protein S27a	FALSE	FALSE	FALSE
Anogam_AGAP003312	1.47714	0.249307244448649	5.92496832258242	3.12357596153399e-09	1.0982965374026e-07	Fem.Oenocytes vs Female total carcass cells	Female Oenocytes	999.186	Female total carcass cells	383.365		TRUE	FALSE	TRUE
Anogam_AGAP003789	0.798174	0.309782616851595	2.57656183239556	0.00997883561761942	0.0354525854303757	Fem.Oenocytes vs Female total carcass cells	Female Oenocytes	998.86	Female total carcass cells	614.324	flotillin	FALSE	FALSE	FALSE
Anogam_AGAP010710	1.28985	0.394690787648338	3.26799666311846	0.001083116426282	0.00603516498554321	Fem.Oenocytes vs Female total carcass cells	Female Oenocytes	998.095	Female total carcass cells	435.938	Tyrosine-protein kinase shark	FALSE	FALSE	FALSE
Anogam_AGAP004175	-0.180632	0.313218757550426	-0.576695738001084	0.564145012052144	0.694207067145826	Fem.Oenocytes vs Female total carcass cells	Female Oenocytes	998.054	Female total carcass cells	1211.22	uridine monophosphate synthetase	FALSE	FALSE	FALSE
Anogam_AGAP007712	-0.144326	0.264354311308942	-0.545955493244284	0.585096531205175	0.710850230485127	Fem.Oenocytes vs Female total carcass cells	Female Oenocytes	997.454	Female total carcass cells	1178.4	A-kinase anchor protein 13	FALSE	FALSE	FALSE
Anogam_AGAP011338	1.90884	0.460253678990147	4.14735876837774	3.36332811015154e-05	0.00033476238543843	Fem.Oenocytes vs Female total carcass cells	Female Oenocytes	997.101	Female total carcass cells	284.347	peptide-O-fucosyltransferase	TRUE	FALSE	TRUE
Anogam_AGAP010026	1.23127	0.396142459213045	3.10814698260619	0.00188264411690424	0.00943277597704925	Fem.Oenocytes vs Female total carcass cells	Female Oenocytes	997.006	Female total carcass cells	453.19	phospholipid-translocating ATPase	FALSE	FALSE	FALSE
Anogam_AGAP010258	0.470561	0.275874396615545	1.70570869473224	0.0880623300196696	0.186283597428418	Fem.Oenocytes vs Female total carcass cells	Female Oenocytes	996.484	Female total carcass cells	769.703	kinesin light chain	FALSE	FALSE	FALSE
Anogam_AGAP002711	1.49308	0.512068318283233	2.91578810656634	0.0035479136745442	0.0156479037903647	Fem.Oenocytes vs Female total carcass cells	Female Oenocytes	995.204	Female total carcass cells	378.144	stardust2C isoform B	FALSE	FALSE	FALSE
Anogam_AGAP000948	0.673477	0.323093835204241	2.08446134629783	0.0371182226991017	0.0984686685655194	Fem.Oenocytes vs Female total carcass cells	Female Oenocytes	995.156	Female total carcass cells	667.045	Protein YIPF	FALSE	FALSE	FALSE
Anogam_AGAP011118	1.4611	0.590812776966002	2.4730260233875	0.0133974386884894	0.0448715524257359	Fem.Oenocytes vs Female total carcass cells	Female Oenocytes	993.723	Female total carcass cells	384.84	focal adhesion kinase 1	FALSE	FALSE	FALSE
Anogam_AGAP004551	-1.03623	0.29479686994941	-3.51505088493762	0.000439669734867155	0.0028930551300069	Fem.Oenocytes vs Female total carcass cells	Female Oenocytes	993.666	Female total carcass cells	2175.75	gamma-interferon-inducible lysosomal thiol reductase	FALSE	FALSE	FALSE
Anogam_AGAP012991	2.99091	0.686841630903814	4.3545803003731	1.33322103382609e-05	0.000155903058492669	Fem.Oenocytes vs Female total carcass cells	Female Oenocytes	993.484	Female total carcass cells	133.383	Fascin	TRUE	FALSE	TRUE
Anogam_AGAP006072	1.30317	0.559813559826422	2.32786793952204	0.0199191171217947	0.0611825210928123	Fem.Oenocytes vs Female total carcass cells	Female Oenocytes	991.987	Female total carcass cells	430.946	molybdenum cofactor biosynthesis protein	FALSE	FALSE	FALSE
Anogam_AGAP005216	0.961552	0.343323242839698	2.80071842572162	0.00509889876538333	0.02099474131485	Fem.Oenocytes vs Female total carcass cells	Female Oenocytes	991.345	Female total carcass cells	545.256	1-phosphatidylinositol-3-phosphate 5-kinase	FALSE	FALSE	FALSE
Anogam_AGAP011925	1.4064	0.516274977765515	2.72413811588296	0.00644695395778688	0.0252511010785357	Fem.Oenocytes vs Female total carcass cells	Female Oenocytes	991.247	Female total carcass cells	399.808	Patatin-like phospholipase domain containing 5	FALSE	FALSE	FALSE
Anogam_AGAP009020	-0.403398	0.310174410646987	-1.30055180637658	0.193411912435013	0.331129643053114	Fem.Oenocytes vs Female total carcass cells	Female Oenocytes	990.288	Female total carcass cells	1401.46		FALSE	FALSE	FALSE
Anogam_AGAP011727	0.89999	0.277158181103326	3.24720852024667	0.00116542970484136	0.00639786827257902	Fem.Oenocytes vs Female total carcass cells	Female Oenocytes	990.013	Female total carcass cells	567.687		FALSE	FALSE	FALSE
Anogam_AGAP002651	0.715627	0.272333987385468	2.6277535569439	0.00859507593658561	0.0315358281305063	Fem.Oenocytes vs Female total carcass cells	Female Oenocytes	989.6	Female total carcass cells	644.325	IAP6 inhibitor of apoptosis 6	FALSE	FALSE	FALSE
Anogam_AGAP007019	1.6042	0.455356689279513	3.52294240028624	0.000426784102065572	0.00281732576279673	Fem.Oenocytes vs Female total carcass cells	Female Oenocytes	989.01	Female total carcass cells	347.955	strumpellin	FALSE	FALSE	FALSE
Anogam_AGAP003134	1.0805	0.390976725445352	2.763586213559	0.00571699871971546	0.0229667573223905	Fem.Oenocytes vs Female total carcass cells	Female Oenocytes	988.428	Female total carcass cells	500.345	FK506-binding protein 2	FALSE	FALSE	FALSE
Anogam_AGAP004749	0.568374	0.326199920326244	1.74240908235525	0.0814368877986294	0.176277181289523	Fem.Oenocytes vs Female total carcass cells	Female Oenocytes	987.497	Female total carcass cells	713.05	coproporphyrinogen III oxidase	FALSE	FALSE	FALSE
Anogam_AGAP005549	0.230152	0.291254402528652	0.790210060368135	0.429405101663733	0.578952826488776	Fem.Oenocytes vs Female total carcass cells	Female Oenocytes	986.996	Female total carcass cells	900.165	Pre-mRNA-splicing factor rse1	FALSE	FALSE	FALSE
Anogam_AGAP004353	2.09011	0.486192936253756	4.29893068674201	1.71624130785333e-05	0.000191918918709893	Fem.Oenocytes vs Female total carcass cells	Female Oenocytes	986.286	Female total carcass cells	247.488	dual specificity phosphatase	TRUE	FALSE	TRUE
Anogam_AGAP003623	-0.407754	0.271170264447354	-1.50368313817985	0.132662972893797	0.253200436233787	Fem.Oenocytes vs Female total carcass cells	Female Oenocytes	986.275	Female total carcass cells	1397.81	long-chain acyl-CoA synthetase	FALSE	FALSE	FALSE
Anogam_AGAP008631	1.08838	0.451938914978094	2.40825203119973	0.0160291111622776	0.0517871377999447	Fem.Oenocytes vs Female total carcass cells	Female Oenocytes	984.44	Female total carcass cells	495.736	ethanolaminephosphotransferase	FALSE	FALSE	FALSE
Anogam_AGAP000099	1.01011	0.439404237595696	2.29882342908683	0.0215149678380959	0.0650920020459484	Fem.Oenocytes vs Female total carcass cells	Female Oenocytes	984.227	Female total carcass cells	522.149	STAT2 JAKSTAT pathway signalling transcription factor	FALSE	FALSE	FALSE
Anogam_AGAP008813	0.722838	0.308802123968458	2.34078010503218	0.0192434973553799	0.0596665045273475	Fem.Oenocytes vs Female total carcass cells	Female Oenocytes	983.042	Female total carcass cells	636.059	FMS-like tyrosine kinase 1	FALSE	FALSE	FALSE
Anogam_AGAP010246	1.26552	0.561511958706887	2.25377364474651	0.0242104116286887	0.0711841758002135	Fem.Oenocytes vs Female total carcass cells	Female Oenocytes	982.717	Female total carcass cells	437.822	Valacyclovir hydrolase	FALSE	FALSE	FALSE
Anogam_AGAP004332	-0.298488	0.256296092094243	-1.16462051038395	0.24417263778789	0.391840406186589	Fem.Oenocytes vs Female total carcass cells	Female Oenocytes	982.689	Female total carcass cells	1291.08	Macrophage erythroblast attacher	FALSE	FALSE	FALSE
Anogam_AGAP003715	1.32391	0.317777276966352	4.16615691596909	3.0977751663069e-05	0.000313205884403678	Fem.Oenocytes vs Female total carcass cells	Female Oenocytes	981.815	Female total carcass cells	419.57	cyclin G-associated kinase	TRUE	FALSE	TRUE
Anogam_AGAP013181	0.434028	0.340994055467288	1.27283059124188	0.203078163293813	0.343113567837236	Fem.Oenocytes vs Female total carcass cells	Female Oenocytes	981.775	Female total carcass cells	778.295	carboxypeptidase A	FALSE	FALSE	FALSE
Anogam_AGAP007553	1.55931	0.349015471195033	4.46773590496501	7.90518141006002e-06	9.86973628332965e-05	Fem.Oenocytes vs Female total carcass cells	Female Oenocytes	981.504	Female total carcass cells	356.861		TRUE	FALSE	TRUE
Anogam_AGAP027995	-0.342063	0.239342716868083	-1.42917642664004	0.152953531340547	0.279867763354162	Fem.Oenocytes vs Female total carcass cells	Female Oenocytes	980.525	Female total carcass cells	1328.54		FALSE	FALSE	FALSE
Anogam_AGAP011165	-0.358252	0.300339377431174	-1.19282492163786	0.232937947651326	0.379042792679448	Fem.Oenocytes vs Female total carcass cells	Female Oenocytes	980.167	Female total carcass cells	1345.09	prefoldin	FALSE	FALSE	FALSE
Anogam_AGAP002058	1.83837	0.498834988054643	3.68533595869137	0.000228401155257094	0.00167047935710549	Fem.Oenocytes vs Female total carcass cells	Female Oenocytes	980.073	Female total carcass cells	293.924	beta-galactosidase	FALSE	FALSE	FALSE
Anogam_AGAP007319	-0.121061	0.255898498102172	-0.473080457767457	0.636155778418943	0.751152951892992	Fem.Oenocytes vs Female total carcass cells	Female Oenocytes	979.808	Female total carcass cells	1139.67		FALSE	FALSE	FALSE
Anogam_AGAP007851	-2.97815	0.613365816420791	-4.85542802681617	1.20126980786284e-06	1.92957498807732e-05	Fem.Oenocytes vs Female total carcass cells	Female Oenocytes	979.795	Female total carcass cells	8235.45		FALSE	TRUE	TRUE
Anogam_AGAP005202	0.0719991	0.358955875892953	0.200579316779621	0.84102753220519	0.900051637854148	Fem.Oenocytes vs Female total carcass cells	Female Oenocytes	979.511	Female total carcass cells	996.561	RING-box protein 1	FALSE	FALSE	FALSE
Anogam_AGAP000367	0.704694	0.274899695919758	2.56345714462562	0.010363549408593	0.0365402610436676	Fem.Oenocytes vs Female total carcass cells	Female Oenocytes	978.449	Female total carcass cells	641.179	glyoxalase domain-containing protein 4	FALSE	FALSE	FALSE
Anogam_AGAP000434	0.716183	0.349150161054844	2.05121645757925	0.0402458718879408	0.104649494576216	Fem.Oenocytes vs Female total carcass cells	Female Oenocytes	978.032	Female total carcass cells	636.25	dolichyl-diphosphooligosaccharide--protein glycosyltransferase	FALSE	FALSE	FALSE
Anogam_AGAP011603	-1.53169	0.792199665508326	-1.93346165525541	0.0531793523406701	0.128667813382014	Fem.Oenocytes vs Female total carcass cells	Female Oenocytes	977.549	Female total carcass cells	3018.58	long-chain acyl-CoA synthetase	FALSE	FALSE	FALSE
Anogam_AGAP008542	1.44791	0.427770105190229	3.38478950473659	0.000712328573510627	0.00431274909121937	Fem.Oenocytes vs Female total carcass cells	Female Oenocytes	977.007	Female total carcass cells	382.488	abhydrolase domain-containing protein 2	FALSE	FALSE	FALSE
Anogam_AGAP008060	-2.77521	0.369424896995488	-7.5122384783051	5.81247782446025e-14	8.74606957351136e-12	Fem.Oenocytes vs Female total carcass cells	Female Oenocytes	976.704	Female total carcass cells	7137.91	IDGF2 imaginal disc growth factor 2	FALSE	TRUE	TRUE
Anogam_AGAP008227	-4.04126	0.58368678718521	-6.92367487975734	4.40075274804426e-12	3.78390774100747e-10	Fem.Oenocytes vs Female total carcass cells	Female Oenocytes	976.287	Female total carcass cells	17149.8	trehalose 6-phosphate synthase-phosphatase	FALSE	TRUE	TRUE
Anogam_AGAP000260	-0.820516	0.430160961034282	-1.90746182809657	0.0564608095625221	0.134883727164073	Fem.Oenocytes vs Female total carcass cells	Female Oenocytes	976.007	Female total carcass cells	1845.56	mitochondrial ATP synthase epsilon chain	FALSE	FALSE	FALSE
Anogam_AGAP011190	-0.763245	0.337920218081369	-2.25865356277277	0.0239049431805112	0.070529232590251	Fem.Oenocytes vs Female total carcass cells	Female Oenocytes	975.914	Female total carcass cells	1772.7	eukaryotic translation initiation factor 2 subunit alpha	FALSE	FALSE	FALSE
Anogam_AGAP002064	2.37143	0.608723977103593	3.89574701888411	9.78965302916146e-05	0.000823747777914309	Fem.Oenocytes vs Female total carcass cells	Female Oenocytes	974.856	Female total carcass cells	201.159		TRUE	FALSE	TRUE
[truncated: 11,463 more rows]

## Sheet: Sheet 2
gene	log2FoldChange	lfcSE	stat	pvalue	padj	comparison	samples_i	normcounts_i	samples_j	normcounts_j	gene_name	is_signif_pos	is_signif_neg	is_signif_any
[truncated: 13,044 more rows]

[truncated: 1 more sheets: Sheet 3]
