# Supplementary material for: Isolation and transcriptomic analysis of Anopheles gambiae oenocytes enables the delineation of hydrocarbon biosynthesis
Source: eLife. 2020 Jun 15;9:e58019. doi: 10.7554/eLife.58019 (PMC7351493; doi:10.7554/eLife.58019)
Supplement: Supplementary file 4. [file elife-58019-supp4.xlsx]

## Sheet: Information
Sheet 1: Differentially expressed genes in Female Oenocytes vs Male Oenocytes
log2FoldChange: log2 of the fold change in expression levels between the two groups compared
lfcSE standard error of the log2 fold change
stat: z-score of the log2 fold change used to calculated pvalue of differential expression
padj: corrected p-value, using Benjamini-Hochberg method
normcounts_i: mean normalised counts for samples of group i
normcounts_j: mean normalised counts for samples of group j
is_signif_pos: significantly differentially overexpressed, true if padj<0.001 and log2FC>1
is_signif_neg: significantly differentially down-regulated, true if padj<0.001 and log2FC<1
"is_signif_any": true if padj<0.001 and |log2FC|>1

## Sheet: Sheet 1
gene	log2FoldChange	lfcSE	stat	pvalue	padj	comparison	samples_i	normcounts_i	samples_j	normcounts_j	gene_name	is_signif_pos	is_signif_neg	is_signif_any
Anogam_AGAP000002	0.647981933662352	0.311010599011368	2.08347218944351	0.0372082040968068	0.221851193611056	Female vs Male Oenocytes	Female Oenocytes	428.492	Male Oenocytes	280.036	KIBRLG WW domain-containing protein	FALSE	FALSE	FALSE
Anogam_AGAP000005	1.10552110715832	0.22188540022625	4.98239679596337	6.28014873698908e-07	5.03203098800007e-05	Female vs Male Oenocytes	Female Oenocytes	1277.98	Male Oenocytes	610.395	high mobility group protein B1	TRUE	FALSE	TRUE
Anogam_AGAP000007	0.454908607789595	0.507199140864575	0.896903348483901	0.369770493176436	0.741046047557114	Female vs Male Oenocytes	Female Oenocytes	691.248	Male Oenocytes	509.603	IGL1 contactin-like putative cell adhesion molecule	FALSE	FALSE	FALSE
Anogam_AGAP000008	0.201147273490667	0.242226591441527	0.830409544607013	0.406307271011846	0.768224227019053	Female vs Male Oenocytes	Female Oenocytes	961.31	Male Oenocytes	857.669	DnaJ (Hsp40) homolog subfamily A member 1	FALSE	FALSE	FALSE
Anogam_AGAP000009	-0.267616298013034	0.245042133690933	-1.09212360332519	0.274778776066657	0.654891199927572	Female vs Male Oenocytes	Female Oenocytes	363.785	Male Oenocytes	451.096	syntaxin-binding protein	FALSE	FALSE	FALSE
Anogam_AGAP000010	0.321838869352222	0.48825477766172	0.659161741117058	0.509791911980733	0.834033173781595	Female vs Male Oenocytes	Female Oenocytes	365.595	Male Oenocytes	296.72	ethanolamine kinase	FALSE	FALSE	FALSE
Anogam_AGAP000011	0.033138010950654	0.740078215925791	0.0447763631431854	0.964285565671052	0.992901672605709	Female vs Male Oenocytes	Female Oenocytes	1153.39	Male Oenocytes	1183.69	branched-chain-amino-acid aminotransferase 2	FALSE	FALSE	FALSE
Anogam_AGAP000012	0.328906778159509	0.526394896946717	0.624828964086257	0.532083318719155	0.843896601542978	Female vs Male Oenocytes	Female Oenocytes	85.2293	Male Oenocytes	70.7867	TTRNA1 tyrosyl-tRNA synthetase	FALSE	FALSE	FALSE
Anogam_AGAP000013	0.281596676044694	0.417563223253079	0.674380932906111	0.500069161708846	0.829113646071552	Female vs Male Oenocytes	Female Oenocytes	337.549	Male Oenocytes	282.58		FALSE	FALSE	FALSE
Anogam_AGAP000014	0.713328896523272	0.831624330305891	0.857753760355824	0.391028447463507	0.757304490024839	Female vs Male Oenocytes	Female Oenocytes	33.2076	Male Oenocytes	20.6257		FALSE	FALSE	FALSE
Anogam_AGAP000015	-0.806455492633282	1.10278096905629	-0.731292537015223	0.464600487959589	0.807062916605801	Female vs Male Oenocytes	Female Oenocytes	20.3383	Male Oenocytes	36.9277	proto-oncogene tyrosine-protein kinase ROS	FALSE	FALSE	FALSE
Anogam_AGAP000016	-0.0849105534847886	1.55301632313986	-0.0546746046513653	0.956397701643945	0.99137241641324	Female vs Male Oenocytes	Female Oenocytes	30.992	Male Oenocytes	34.0696	SCRB10 Class B Scavenger Receptor (CD36 domain).	FALSE	FALSE	FALSE
Anogam_AGAP000017	0.19388705555245	0.274730819495631	0.705734638394047	0.480353175782618	0.818498646477549	Female vs Male Oenocytes	Female Oenocytes	514.151	Male Oenocytes	463.338		FALSE	FALSE	FALSE
Anogam_AGAP000018	1.30593559402074	0.658675241614094	1.98266992823432	0.0474043107236772	0.25557319270176	Female vs Male Oenocytes	Female Oenocytes	57.8533	Male Oenocytes	23.8362	phosphatidylinositol-42C5-bisphosphate 3-kinase	FALSE	FALSE	FALSE
Anogam_AGAP000019	0.858035751850301	3.90190048090184	0.219902008277768	0.825947472216023	NA	Female vs Male Oenocytes	Female Oenocytes	1.8546	Male Oenocytes	1.00417	chaoptin	FALSE	FALSE	FALSE
Anogam_AGAP000020	-0.144225750055261	0.631891129884431	-0.228244618786846	0.819456075966666	0.95702435153017	Female vs Male Oenocytes	Female Oenocytes	85.2527	Male Oenocytes	98.2949		FALSE	FALSE	FALSE
Anogam_AGAP000021	0.302501192766192	0.436373825913046	0.693215712773915	0.488174188897161	0.824288661185661	Female vs Male Oenocytes	Female Oenocytes	192.405	Male Oenocytes	159.853		FALSE	FALSE	FALSE
Anogam_AGAP000022	1.51603359959088	0.342760336804482	4.42301350770249	9.73336534686748e-06	0.000473907778802505	Female vs Male Oenocytes	Female Oenocytes	2194.47	Male Oenocytes	781.491	amino acid transporter protein	TRUE	FALSE	TRUE
Anogam_AGAP000023	0.534691981987594	1.59398226157775	0.335444123109843	0.73729008856545	0.931237270270468	Female vs Male Oenocytes	Female Oenocytes	68.4031	Male Oenocytes	48.202		FALSE	FALSE	FALSE
Anogam_AGAP000025	0.796304984699189	0.409440045428569	1.94486346313703	0.0517914134798968	0.270485408699936	Female vs Male Oenocytes	Female Oenocytes	209.643	Male Oenocytes	123.016		FALSE	FALSE	FALSE
Anogam_AGAP000028	0.574008547654961	0.38747883598052	1.48139329004235	0.138501801730531	0.468392932671947	Female vs Male Oenocytes	Female Oenocytes	156.517	Male Oenocytes	108.273	calcium-calmodulin-dependent protein kinase (CaM kinase) II	FALSE	FALSE	FALSE
Anogam_AGAP000029	0.0370937522042934	0.37519488552039	0.0988652927740338	0.92124522621256	0.983757283456955	Female vs Male Oenocytes	Female Oenocytes	947.502	Male Oenocytes	943.616	E1A-CREB-binding protein	FALSE	FALSE	FALSE
Anogam_AGAP000032	0.00608842729320398	0.707890629372884	0.00860080221516378	0.993137637307945	0.998041536366349	Female vs Male Oenocytes	Female Oenocytes	443.414	Male Oenocytes	442.216		FALSE	FALSE	FALSE
Anogam_AGAP000033	-0.105388875406323	0.358331172642845	-0.294110262942058	0.76867364884199	0.940260013296801	Female vs Male Oenocytes	Female Oenocytes	253.479	Male Oenocytes	281.271	Protein retinal degeneration B	FALSE	FALSE	FALSE
Anogam_AGAP000035	-0.0789367656793278	0.347248187799046	-0.227320885904836	0.820174233581071	0.95702435153017	Female vs Male Oenocytes	Female Oenocytes	373.525	Male Oenocytes	405.132		FALSE	FALSE	FALSE
Anogam_AGAP000037	0.452344235774894	1.07220322565338	0.421882927557174	0.673110471965135	0.907512947272645	Female vs Male Oenocytes	Female Oenocytes	120.311	Male Oenocytes	87.4523		FALSE	FALSE	FALSE
Anogam_AGAP000038	0.863416473599241	1.22658408724199	0.703919513207334	0.481482898718999	0.819326083171327	Female vs Male Oenocytes	Female Oenocytes	32.6855	Male Oenocytes	17.9523	gamma-aminobutyric acid receptor subunit beta	FALSE	FALSE	FALSE
Anogam_AGAP000039	1.62540181269339	3.08707619494002	0.526518203650936	0.598528207477831	NA	Female vs Male Oenocytes	Female Oenocytes	2.97004	Male Oenocytes	0.995476	gamma-aminobutyric acid receptor subunit alpha	FALSE	FALSE	FALSE
Anogam_AGAP000040	0.399438439541989	0.668800343390389	0.597246163955438	0.550343042085624	0.849429818938769	Female vs Male Oenocytes	Female Oenocytes	1566.54	Male Oenocytes	1190.62		FALSE	FALSE	FALSE
Anogam_AGAP000041	-0.0653885761553028	0.98892030975655	-0.0661211783297282	0.947281349877435	0.989482140869716	Female vs Male Oenocytes	Female Oenocytes	12.8015	Male Oenocytes	13.8487		FALSE	FALSE	FALSE
Anogam_AGAP000042	0.0228978470166769	0.466823425318547	0.0490503384680237	0.960879179892489	0.992580096902443	Female vs Male Oenocytes	Female Oenocytes	90.9726	Male Oenocytes	91.5188	Histone-lysine N-methyltransferase	FALSE	FALSE	FALSE
Anogam_AGAP000043	-0.352069950318237	0.554451174673746	-0.634988194452657	0.525436114606294	0.841624099202526	Female vs Male Oenocytes	Female Oenocytes	29.1889	Male Oenocytes	38.1593	tousled-like kinase	FALSE	FALSE	FALSE
Anogam_AGAP000044	0.836574851427195	0.326974184201864	2.55853486864492	0.0105114278044276	0.100624919414727	Female vs Male Oenocytes	Female Oenocytes	2635.19	Male Oenocytes	1504.26	thioredoxin domain-containing protein	FALSE	FALSE	FALSE
Anogam_AGAP000045	0.572911544992225	1.06778078714261	0.536544159522985	0.591582524854157	NA	Female vs Male Oenocytes	Female Oenocytes	8.4139	Male Oenocytes	5.8106	GPROAR1 putative octopamine receptor 1	FALSE	FALSE	FALSE
Anogam_AGAP000046	2.13177091748379	0.735856709948287	2.89699188532725	0.0037675950045367	0.0519499278674329	Female vs Male Oenocytes	Female Oenocytes	168.657	Male Oenocytes	38.9443		FALSE	FALSE	FALSE
Anogam_AGAP000047	4.53274804132104	1.04970731594052	4.31810655454925	1.57373454758636e-05	0.000693260725378303	Female vs Male Oenocytes	Female Oenocytes	53.4836	Male Oenocytes	2.46875	CPR130 cuticular protein RR-2 family 130	TRUE	FALSE	TRUE
Anogam_AGAP000048	1.03778857356219	0.606548657816784	1.71097332454351	0.0870860372883393	0.3667994683138	Female vs Male Oenocytes	Female Oenocytes	102.682	Male Oenocytes	50.9607		FALSE	FALSE	FALSE
Anogam_AGAP000049	0.906018158478054	0.459823036563581	1.97036269702589	0.0487968175805724	0.259664154784793	Female vs Male Oenocytes	Female Oenocytes	102.89	Male Oenocytes	55.8471		FALSE	FALSE	FALSE
Anogam_AGAP000051	2.16242471715455	3.91706666832859	0.552052058403503	0.580912686890184	NA	Female vs Male Oenocytes	Female Oenocytes	3.22046	Male Oenocytes	0.724498	HPX5 heme peroxidase 5	FALSE	FALSE	FALSE
Anogam_AGAP000053	0.587052040953791	0.392597819269496	1.4953013290958	0.134835818385254	0.461051508026996	Female vs Male Oenocytes	Female Oenocytes	253.423	Male Oenocytes	172.999	Mannose-6-phosphate isomerase	FALSE	FALSE	FALSE
Anogam_AGAP000054	-0.218855450489596	0.358026339358597	-0.611283099678294	0.541012177442205	0.84586533317695	Female vs Male Oenocytes	Female Oenocytes	315.558	Male Oenocytes	377.643	protein scribble	FALSE	FALSE	FALSE
Anogam_AGAP000055	-0.33088691884173	0.635812580200224	-0.52041580985631	0.602773793188586	0.876129389277435	Female vs Male Oenocytes	Female Oenocytes	45.9624	Male Oenocytes	59.9163		FALSE	FALSE	FALSE
Anogam_AGAP000056	-0.800419880012269	1.65327118538641	-0.484143126117081	0.628284296686552	0.888172802398054	Female vs Male Oenocytes	Female Oenocytes	6.9535	Male Oenocytes	12.2303	neuronal PAS domain-containing protein	FALSE	FALSE	FALSE
Anogam_AGAP000057	0.00676039729329851	0.474283591851517	0.014253913501218	0.988627407590273	0.997548091188757	Female vs Male Oenocytes	Female Oenocytes	127.092	Male Oenocytes	131.263	paired box protein	FALSE	FALSE	FALSE
Anogam_AGAP000058	0.26425053829105	0.406490357622127	0.650078244996641	0.515641680954627	0.83720510289557	Female vs Male Oenocytes	Female Oenocytes	97.6673	Male Oenocytes	83.5273		FALSE	FALSE	FALSE
Anogam_AGAP000061	-0.226638209027096	0.773862170814668	-0.292866375401846	0.769624291044783	0.940631369886105	Female vs Male Oenocytes	Female Oenocytes	23.9073	Male Oenocytes	28.9551	One cut domain family member	FALSE	FALSE	FALSE
Anogam_AGAP000062	0.504607365978002	0.572837403742308	0.880891091750357	0.378376769535015	0.747199371073525	Female vs Male Oenocytes	Female Oenocytes	94.6472	Male Oenocytes	68.2079		FALSE	FALSE	FALSE
Anogam_AGAP000063	2.54640863887479	1.38992793692927	1.83204364141388	0.0669449189133796	NA	Female vs Male Oenocytes	Female Oenocytes	11.7494	Male Oenocytes	1.9513	paired box protein	FALSE	FALSE	FALSE
Anogam_AGAP000064	0.915637595122835	0.590160087808442	1.55150714871799	0.120780195519083	0.435527735507508	Female vs Male Oenocytes	Female Oenocytes	2210.02	Male Oenocytes	1178.69	plexA plexin A	FALSE	FALSE	FALSE
Anogam_AGAP000065	0.907522257345049	0.583082808414133	1.55642087924582	0.119608043458494	0.433760317260738	Female vs Male Oenocytes	Female Oenocytes	281.177	Male Oenocytes	152.091		FALSE	FALSE	FALSE
Anogam_AGAP000066	1.08287891081439	1.04578076406829	1.03547411467178	0.300447549061883	0.680319149811687	Female vs Male Oenocytes	Female Oenocytes	14.3076	Male Oenocytes	6.74908		FALSE	FALSE	FALSE
Anogam_AGAP000067	-1.01886382910509	1.39737945729712	-0.729124665304458	0.465925408069441	0.807985165731873	Female vs Male Oenocytes	Female Oenocytes	15.0502	Male Oenocytes	30.1501		FALSE	FALSE	FALSE
Anogam_AGAP000068	0.612098266751346	4.03887150541803	0.151551804985683	0.879540448246622	NA	Female vs Male Oenocytes	Female Oenocytes	0.777958	Male Oenocytes	0.541262	NFI nuclear factor I	FALSE	FALSE	FALSE
Anogam_AGAP000069	NA	NA	NA	NA	NA	Female vs Male Oenocytes	Female Oenocytes	0	Male Oenocytes	0		FALSE	FALSE	FALSE
Anogam_AGAP000070	1.78838486988799	0.610914655888572	2.92738904305184	0.00341821004064214	0.0489222297799921	Female vs Male Oenocytes	Female Oenocytes	64.4724	Male Oenocytes	18.9944	protein kinase	FALSE	FALSE	FALSE
Anogam_AGAP000071	0.789099831694316	2.20038764119415	0.358618552895559	0.719880465609159	NA	Female vs Male Oenocytes	Female Oenocytes	5.13308	Male Oenocytes	3.0543		FALSE	FALSE	FALSE
Anogam_AGAP000072	-1.34445275022999	4.02386263579771	-0.334119941935707	0.738289052467029	NA	Female vs Male Oenocytes	Female Oenocytes	0.400672	Male Oenocytes	1.08497		FALSE	FALSE	FALSE
Anogam_AGAP000073	-5.41372934898554	3.9205571087372	-1.38085715851982	0.167322884719986	NA	Female vs Male Oenocytes	Female Oenocytes	0	Male Oenocytes	9.37003	gamma-sarcoglycan	FALSE	FALSE	FALSE
Anogam_AGAP000074	NA	NA	NA	NA	NA	Female vs Male Oenocytes	Female Oenocytes	0	Male Oenocytes	0		FALSE	FALSE	FALSE
Anogam_AGAP000075	-0.793694734233299	0.960532704965478	-0.82630682966888	0.408630060243929	0.769328305835748	Female vs Male Oenocytes	Female Oenocytes	19.0864	Male Oenocytes	33.949	otopetrin	FALSE	FALSE	FALSE
Anogam_AGAP000076	0.857943385095725	0.553969295045177	1.54872010555343	0.12144901854378	0.436754494133395	Female vs Male Oenocytes	Female Oenocytes	1100.52	Male Oenocytes	615.274	sterol regulatory element-binding transcription factor 1	FALSE	FALSE	FALSE
Anogam_AGAP000078	1.39123677523561	1.11970027531903	1.24250820143741	0.214049116400459	0.588215989330562	Female vs Male Oenocytes	Female Oenocytes	13.6427	Male Oenocytes	5.20954		FALSE	FALSE	FALSE
Anogam_AGAP000079	-3.22233755633555	3.96930732800679	-0.811813570997452	0.416898613730752	NA	Female vs Male Oenocytes	Female Oenocytes	0	Male Oenocytes	2.11369		FALSE	FALSE	FALSE
Anogam_AGAP000080	-0.705906685863554	0.905387328953223	-0.77967369686927	0.435582964917239	0.788510064574803	Female vs Male Oenocytes	Female Oenocytes	15.4339	Male Oenocytes	25.8453		FALSE	FALSE	FALSE
Anogam_AGAP000081	-0.240841054618782	0.469236303062153	-0.513261768211658	0.607768223628471	0.877945178094872	Female vs Male Oenocytes	Female Oenocytes	84.7181	Male Oenocytes	102.951	glucuronyl-N-acetylglucosaminyl transferase	FALSE	FALSE	FALSE
Anogam_AGAP000082	0.94990504315039	0.465604096938097	2.0401561098735	0.0413347796369788	0.235247604913812	Female vs Male Oenocytes	Female Oenocytes	603.435	Male Oenocytes	318.022	translation initiation factor eIF-2B subunit epsilon	FALSE	FALSE	FALSE
Anogam_AGAP000083	-0.4140367247938	0.681062464900628	-0.607927680839395	0.543235439670551	0.846419205954298	Female vs Male Oenocytes	Female Oenocytes	47.1455	Male Oenocytes	63.6126	potassium channel tetramerisation domain containing protein	FALSE	FALSE	FALSE
Anogam_AGAP000084	-0.509246100820925	0.39725476312999	-1.28191314009315	0.199873117941834	0.568448532190079	Female vs Male Oenocytes	Female Oenocytes	65.1472	Male Oenocytes	95.2595		FALSE	FALSE	FALSE
Anogam_AGAP000085	-0.257924123962808	1.36423326359544	-0.189061600274318	0.850044537212305	0.964978216171848	Female vs Male Oenocytes	Female Oenocytes	10.0175	Male Oenocytes	12.1709	CPR129 cuticular protein RR-2 family 129	FALSE	FALSE	FALSE
Anogam_AGAP000088	-0.52390857711992	2.75954846603853	-0.189853008043746	0.849424316790827	NA	Female vs Male Oenocytes	Female Oenocytes	3.66748	Male Oenocytes	5.4831	CYP4H19 cytochrome P450	FALSE	FALSE	FALSE
Anogam_AGAP000090	0.717943023811017	0.53981599552838	1.32997730663443	0.183525748410568	0.545591006668403	Female vs Male Oenocytes	Female Oenocytes	73.853	Male Oenocytes	46.0849	adenylate cyclase	FALSE	FALSE	FALSE
Anogam_AGAP000091	3.38754212147075	0.834976451800945	4.05705108708662	4.96962145928178e-05	0.00179329319041317	Female vs Male Oenocytes	Female Oenocytes	631.876	Male Oenocytes	60.7378	methylsterol monooxygenase	FALSE	FALSE	FALSE
Anogam_AGAP000092	-0.0478543889907183	0.27934543696962	-0.171309005473115	0.863980799793224	0.966006264902761	Female vs Male Oenocytes	Female Oenocytes	7505.1	Male Oenocytes	7949.18	methylsterol monooxygenase	FALSE	FALSE	FALSE
Anogam_AGAP000093	-0.200517415118135	0.478349874656888	-0.41918567505001	0.675080440387806	0.907793271764095	Female vs Male Oenocytes	Female Oenocytes	327.564	Male Oenocytes	388.165		FALSE	FALSE	FALSE
Anogam_AGAP000094	2.07133511617159	0.786371871085639	2.63404019438281	0.00843754988809256	0.0878817888037153	Female vs Male Oenocytes	Female Oenocytes	96.9449	Male Oenocytes	23.8804	4-nitrophenylphosphatase	FALSE	FALSE	FALSE
Anogam_AGAP000095	0.960207613195883	0.322861779669053	2.97405166439996	0.00293895586994849	0.0444380608210934	Female vs Male Oenocytes	Female Oenocytes	1248.21	Male Oenocytes	655.137	anoctamin 5	FALSE	FALSE	FALSE
Anogam_AGAP000096	0.375071121998943	0.345304899889021	1.08620272147742	0.277389313519734	0.658843412555027	Female vs Male Oenocytes	Female Oenocytes	260.623	Male Oenocytes	206.794		FALSE	FALSE	FALSE
Anogam_AGAP000097	0.114310501137495	0.455980152417246	0.250691835009729	0.802052373861749	0.952642291231842	Female vs Male Oenocytes	Female Oenocytes	86.653	Male Oenocytes	82.2772	solute carrier family 25	FALSE	FALSE	FALSE
Anogam_AGAP000098	0.882250669765007	0.441503357773319	1.9982875650472	0.0456854928537768	0.249943857677437	Female vs Male Oenocytes	Female Oenocytes	89.4912	Male Oenocytes	49.7895	APG1 autophagy related gene	FALSE	FALSE	FALSE
Anogam_AGAP000099	0.514490333701816	0.428802829645761	1.19982961429346	0.230205520264882	0.606346795377437	Female vs Male Oenocytes	Female Oenocytes	984.227	Male Oenocytes	698.755	STAT2 JAKSTAT pathway signalling transcription factor	FALSE	FALSE	FALSE
Anogam_AGAP000100	-1.51670136409433	1.28534437410577	-1.17999611205326	0.238001761252383	0.615634449035142	Female vs Male Oenocytes	Female Oenocytes	12.7032	Male Oenocytes	36.05		FALSE	FALSE	FALSE
Anogam_AGAP000102	0.901910837538153	0.363985784323052	2.47787379722959	0.0132167885153053	0.116721969489579	Female vs Male Oenocytes	Female Oenocytes	368.395	Male Oenocytes	202.115	alpha-12C6-mannosyltransferase	FALSE	FALSE	FALSE
Anogam_AGAP000104	0.444539417908927	1.40219726652292	0.317030583728969	0.751220395869376	0.935667286094958	Female vs Male Oenocytes	Female Oenocytes	21.5041	Male Oenocytes	15.8387		FALSE	FALSE	FALSE
Anogam_AGAP000105	0.0674068574564854	0.357889292599961	0.18834555503685	0.850605776556161	0.964978216171848	Female vs Male Oenocytes	Female Oenocytes	129.737	Male Oenocytes	126.8		FALSE	FALSE	FALSE
Anogam_AGAP000106	-0.127692638417385	0.418819820076606	-0.304886808828744	0.760452362784945	0.938065312719263	Female vs Male Oenocytes	Female Oenocytes	159.888	Male Oenocytes	180.011	Ubiquinone biosynthesis monooxygenase COQ62C mitochondrial	FALSE	FALSE	FALSE
Anogam_AGAP000107	-2.03452613330491	1.37647560836982	-1.47806915061462	0.139389270253567	0.469988473856958	Female vs Male Oenocytes	Female Oenocytes	8.2211	Male Oenocytes	34.3899		FALSE	FALSE	FALSE
Anogam_AGAP000108	0.290049627188084	1.61443649459435	0.179659979292628	0.857419514027124	NA	Female vs Male Oenocytes	Female Oenocytes	5.15014	Male Oenocytes	4.48072	OEH ovary ecdysteroidogenic hormone	FALSE	FALSE	FALSE
Anogam_AGAP000109	-0.12298080392779	0.31181131929649	-0.39440775981212	0.693280015655927	0.913244975963069	Female vs Male Oenocytes	Female Oenocytes	1448.07	Male Oenocytes	1633.58	cytochrome c oxidase subunit VIIa	FALSE	FALSE	FALSE
Anogam_AGAP000110	0.48547179943335	0.366844705652117	1.32337142107682	0.185711890961062	0.549521431352071	Female vs Male Oenocytes	Female Oenocytes	234.894	Male Oenocytes	172.903	mRpL40 39S ribosomal protein L402C mitochondrial	FALSE	FALSE	FALSE
Anogam_AGAP000111	0.689592213364309	4.0804728567969	0.168998113102418	0.865798125578915	NA	Female vs Male Oenocytes	Female Oenocytes	0.410702	Male Oenocytes	0		FALSE	FALSE	FALSE
Anogam_AGAP000112	1.31587381860528	0.551884217259508	2.38432949784198	0.0171102747311036	0.137205796425304	Female vs Male Oenocytes	Female Oenocytes	432.49	Male Oenocytes	176.141	NAD+ synthase (glutamine-hydrolysing)	FALSE	FALSE	FALSE
Anogam_AGAP000113	1.44607724680891	1.72150726003654	0.840006475940287	0.400904755551218	0.764318366829798	Female vs Male Oenocytes	Female Oenocytes	14.3588	Male Oenocytes	5.22145		FALSE	FALSE	FALSE
Anogam_AGAP000114	4.42973894259527	2.3267107039619	1.90386322418699	0.0569279997749434	0.285971086396396	Female vs Male Oenocytes	Female Oenocytes	15.9209	Male Oenocytes	0.722138	ovo	FALSE	FALSE	FALSE
Anogam_AGAP000115	NA	NA	NA	NA	NA	Female vs Male Oenocytes	Female Oenocytes	0	Male Oenocytes	0	GPRNPY4 putative neuropeptide Y receptor 4	FALSE	FALSE	FALSE
Anogam_AGAP000116	0.862787420562621	0.513200566521949	1.68118953260298	0.092726106023262	0.378802170941232	Female vs Male Oenocytes	Female Oenocytes	166.429	Male Oenocytes	92.8564	Rab11 family-interacting protein 1-2-5	FALSE	FALSE	FALSE
Anogam_AGAP000117	0.301497444214842	0.959033269703648	0.314376418148672	0.753235164480783	0.936326641332982	Female vs Male Oenocytes	Female Oenocytes	16.7285	Male Oenocytes	14.0088	Wnt inhibitory factor 1000117]	FALSE	FALSE	FALSE
Anogam_AGAP000118	-0.0583337646251759	0.272412451432724	-0.214137658974015	0.830439709239663	0.959446334582248	Female vs Male Oenocytes	Female Oenocytes	417.617	Male Oenocytes	447.628	ubiquinone biosynthesis monooxygenase Coq7	FALSE	FALSE	FALSE
Anogam_AGAP000119	-0.565696813780505	0.34809432187855	-1.62512508313157	0.104135909258578	0.400761172598961	Female vs Male Oenocytes	Female Oenocytes	107.289	Male Oenocytes	162.507	golgi to ER traffic protein 4 homolog	FALSE	FALSE	FALSE
Anogam_AGAP000120	-0.188296652414819	0.313384612937007	-0.600848429187772	0.547940944504642	0.847916071756663	Female vs Male Oenocytes	Female Oenocytes	390.152	Male Oenocytes	455.143	tubulin folding cofactor B	FALSE	FALSE	FALSE
Anogam_AGAP000121	0.627628235328369	4.03861879993864	0.155406654210074	0.876500738598503	NA	Female vs Male Oenocytes	Female Oenocytes	0.727804	Male Oenocytes	0.359005		FALSE	FALSE	FALSE
Anogam_AGAP000123	1.01293156518664	2.96681847630404	0.341420135163953	0.732787319111622	NA	Female vs Male Oenocytes	Female Oenocytes	2.84332	Male Oenocytes	1.44266	CTLSE2 C-type lectin (CTL)	FALSE	FALSE	FALSE
Anogam_AGAP000124	0.487333992498635	0.344454002959416	1.41480136189926	0.157126744704141	0.501957087010341	Female vs Male Oenocytes	Female Oenocytes	202.963	Male Oenocytes	148.95	inositol polyphosphate-4-phosphatase	FALSE	FALSE	FALSE
Anogam_AGAP000126	0.429705650709141	0.42181346320231	1.01871013657771	0.308340598832828	0.689379936205886	Female vs Male Oenocytes	Female Oenocytes	1978.04	Male Oenocytes	1494.42		FALSE	FALSE	FALSE
Anogam_AGAP000127	0.0663622922487933	0.284824577084348	0.232993560205097	0.815766406386687	0.956474127363858	Female vs Male Oenocytes	Female Oenocytes	521.091	Male Oenocytes	514.601	zinc finger protein-like 1 homolog	FALSE	FALSE	FALSE
Anogam_AGAP000128	-1.47221590482096	2.19325846608434	-0.671245969221917	0.502063848504364	NA	Female vs Male Oenocytes	Female Oenocytes	3.20324	Male Oenocytes	9.50259	MFS transporter2C VNT family2C synaptic vesicle glycoprotein 2	FALSE	FALSE	FALSE
Anogam_AGAP000129	-0.564619101077191	0.488785089159147	-1.1551479650259	0.248029839086361	0.628113026981532	Female vs Male Oenocytes	Female Oenocytes	158.018	Male Oenocytes	237.555		FALSE	FALSE	FALSE
Anogam_AGAP000130	-1.64261412461148	2.6186819026353	-0.627267528354034	0.530483884834301	NA	Female vs Male Oenocytes	Female Oenocytes	0.709434	Male Oenocytes	2.35583	predicted G-protein coupled receptor GPCR	FALSE	FALSE	FALSE
Anogam_AGAP000131	1.08252611386836	1.11789372569289	0.968362277189979	0.332863472136499	0.70877143596171	Female vs Male Oenocytes	Female Oenocytes	32.9092	Male Oenocytes	16.3601		FALSE	FALSE	FALSE
Anogam_AGAP000132	0.552237528773527	0.499922664618436	1.10464591397355	0.269313047857349	0.648573983931094	Female vs Male Oenocytes	Female Oenocytes	277.588	Male Oenocytes	197.609		FALSE	FALSE	FALSE
Anogam_AGAP000133	2.54511550594479	2.15474448681414	1.18116812527866	0.237535940990791	NA	Female vs Male Oenocytes	Female Oenocytes	7.21052	Male Oenocytes	1.27339		FALSE	FALSE	FALSE
Anogam_AGAP000136	1.15149158758151	1.24663677147714	0.923678503576552	0.355653727420584	0.728635460082921	Female vs Male Oenocytes	Female Oenocytes	31.2915	Male Oenocytes	14.1232	tetratricopeptide repeat domain 21B	FALSE	FALSE	FALSE
Anogam_AGAP000137	3.15481056784476	3.95138720031532	0.798405827602269	0.424635022554557	NA	Female vs Male Oenocytes	Female Oenocytes	2.21091	Male Oenocytes	0	solute carrier family 452C member 1-2-4	FALSE	FALSE	FALSE
Anogam_AGAP000138	0.450462527297888	0.730372920572628	0.61675688488658	0.537395094205048	0.844411058133218	Female vs Male Oenocytes	Female Oenocytes	35.268	Male Oenocytes	26.2211	alpha4 nicotinic acetylcholine receptor subunit alpha 4	FALSE	FALSE	FALSE
Anogam_AGAP000139	1.1325088582664	0.755157832180183	1.49969822202172	0.133692591348282	0.458044067176846	Female vs Male Oenocytes	Female Oenocytes	62.4916	Male Oenocytes	28.8193	DNA polymerase gamma	FALSE	FALSE	FALSE
Anogam_AGAP000140	3.12764367412819	1.36199316012339	2.29637252645588	0.0216545904482518	0.160727288403655	Female vs Male Oenocytes	Female Oenocytes	19.4217	Male Oenocytes	2.35865	IR100a ionotropic receptor IR100a	FALSE	FALSE	FALSE
Anogam_AGAP000141	-0.0239065061814495	0.310492033093955	-0.0769955542602131	0.938627081656779	0.987215628566101	Female vs Male Oenocytes	Female Oenocytes	379.155	Male Oenocytes	394.691		FALSE	FALSE	FALSE
Anogam_AGAP000142	0.0815231633137769	0.326859377068585	0.249413567525312	0.803040891335106	0.952642291231842	Female vs Male Oenocytes	Female Oenocytes	184.58	Male Oenocytes	178.268		FALSE	FALSE	FALSE
Anogam_AGAP000143	0.0102060105481521	0.564281142243094	0.01808674751664	0.985569650173394	0.996443937093694	Female vs Male Oenocytes	Female Oenocytes	607.715	Male Oenocytes	630.882	beta-mannosidase	FALSE	FALSE	FALSE
Anogam_AGAP000144	-0.351177504029573	0.816496718136244	-0.430102774731513	0.667120881707735	0.904064734619511	Female vs Male Oenocytes	Female Oenocytes	55.8389	Male Oenocytes	74.6762	progestin and adipoQ receptor family member 3	FALSE	FALSE	FALSE
Anogam_AGAP000145	-0.201529413598137	0.29299393388104	-0.687827938717534	0.491561140015943	0.825842192636988	Female vs Male Oenocytes	Female Oenocytes	424.315	Male Oenocytes	504.557	ubiquitin-conjugating enzyme E2D	FALSE	FALSE	FALSE
Anogam_AGAP000146	-0.827905749619764	0.669545145041999	-1.23651968168305	0.216265454446986	0.591519245377049	Female vs Male Oenocytes	Female Oenocytes	37.6762	Male Oenocytes	67.7949		FALSE	FALSE	FALSE
Anogam_AGAP000147	-0.140991379147949	0.393107200261311	-0.358658857060434	0.71985031055336	0.924235785886628	Female vs Male Oenocytes	Female Oenocytes	130.06	Male Oenocytes	147.654	PDZ-binding kinase	FALSE	FALSE	FALSE
Anogam_AGAP000149	0.375270802871523	0.412707256373592	0.909290537241777	0.363196784248415	0.734915584909897	Female vs Male Oenocytes	Female Oenocytes	615.9	Male Oenocytes	485.234	Ras association domain-containing protein 2-4	FALSE	FALSE	FALSE
Anogam_AGAP000150	11.1345169289433	3.90693706479972	2.84993506275333	0.00437281558951972	0.0562101195011392	Female vs Male Oenocytes	Female Oenocytes	587.351	Male Oenocytes	0	SG6 salivary gland protein 6	FALSE	FALSE	FALSE
Anogam_AGAP000151	9.25154635855037	3.9074150139456	2.36768971955411	0.0178995402570347	0.141798564619913	Female vs Male Oenocytes	Female Oenocytes	146.373	Male Oenocytes	0		FALSE	FALSE	FALSE
Anogam_AGAP000152	6.90761374029139	2.50067181781603	2.76230319031794	0.00573951529840344	0.067269005424078	Female vs Male Oenocytes	Female Oenocytes	30.336	Male Oenocytes	0		FALSE	FALSE	FALSE
Anogam_AGAP000153	2.42220635082328	1.6030136805596	1.51103286278737	0.130780078274297	NA	Female vs Male Oenocytes	Female Oenocytes	10.144	Male Oenocytes	1.98056		FALSE	FALSE	FALSE
Anogam_AGAP000154	-1.54927823827029	1.41013902022116	-1.09867056797514	0.271911784782768	0.651359303660416	Female vs Male Oenocytes	Female Oenocytes	5.57482	Male Oenocytes	16.2717	AMP dependent ligase	FALSE	FALSE	FALSE
Anogam_AGAP000155	-0.266258805089015	0.341410474864684	-0.779878839963964	0.435462194557281	0.788510064574803	Female vs Male Oenocytes	Female Oenocytes	90.2041	Male Oenocytes	111.147	alkylated DNA repair protein alkB homolog	FALSE	FALSE	FALSE
Anogam_AGAP000156	0.440837969279023	0.755024046715446	0.583872753717957	0.559305925475094	0.853170004142491	Female vs Male Oenocytes	Female Oenocytes	74.4481	Male Oenocytes	56.8904		FALSE	FALSE	FALSE
Anogam_AGAP000158	-0.602593066212558	0.385094053206701	-1.56479452537563	0.117631095837805	0.429499114189274	Female vs Male Oenocytes	Female Oenocytes	177.397	Male Oenocytes	278.015	histone arginine demethylase	FALSE	FALSE	FALSE
Anogam_AGAP000159	0.00372275242476765	0.354701251959177	0.0104954589367959	0.991625989095457	0.997995878933861	Female vs Male Oenocytes	Female Oenocytes	283.371	Male Oenocytes	290.589	Kinesin-like protein	FALSE	FALSE	FALSE
Anogam_AGAP000160	0.306788064058008	1.70369749115882	0.180071911621668	0.857096113412612	NA	Female vs Male Oenocytes	Female Oenocytes	4.30573	Male Oenocytes	3.60976		FALSE	FALSE	FALSE
Anogam_AGAP000161	-0.243012599713497	0.45470619447871	-0.534438726950036	0.593038031305506	0.871444766290951	Female vs Male Oenocytes	Female Oenocytes	577.373	Male Oenocytes	692.402	Adaptor-related protein complex 32C delta 1 subunit	FALSE	FALSE	FALSE
Anogam_AGAP000162	0.0756865009863012	0.489768660591949	0.154535206264166	0.877187754031108	0.970303623709557	Female vs Male Oenocytes	Female Oenocytes	3686.28	Male Oenocytes	3532.92	Cystathionine beta-synthase	FALSE	FALSE	FALSE
Anogam_AGAP000163	-0.689873423262922	0.74063229451377	-0.931465490194198	0.351612827790246	0.725174733602258	Female vs Male Oenocytes	Female Oenocytes	1527.89	Male Oenocytes	2593.67	GSTMS2 glutathione transferase microsomal 2	FALSE	FALSE	FALSE
Anogam_AGAP000164	1.11676384027431	0.85237660763076	1.31017654670092	0.190136117891479	0.555567228547168	Female vs Male Oenocytes	Female Oenocytes	24.988	Male Oenocytes	11.4938		FALSE	FALSE	FALSE
Anogam_AGAP000165	-0.1822393238775	0.453786887508175	-0.401596716199115	0.687980846963821	0.911125008342444	Female vs Male Oenocytes	Female Oenocytes	571.453	Male Oenocytes	675.504	GSTMS1 glutathione transferase microsomal 1	FALSE	FALSE	FALSE
Anogam_AGAP000166	-0.625308361713402	0.845110417682393	-0.739913209717885	0.459352658503726	0.804539182949038	Female vs Male Oenocytes	Female Oenocytes	11.3922	Male Oenocytes	17.9222		FALSE	FALSE	FALSE
Anogam_AGAP000167	-0.894985893372439	0.270968465002144	-3.30291531660467	0.000956852789448311	0.0191671928846969	Female vs Male Oenocytes	Female Oenocytes	2210.17	Male Oenocytes	4230.55	Lipid storage droplets surface-binding protein 2	FALSE	FALSE	FALSE
Anogam_AGAP000168	1.69655497664428	0.911550542425736	1.86117488573871	0.0627194837319592	0.301053521913404	Female vs Male Oenocytes	Female Oenocytes	30.7393	Male Oenocytes	9.58446	GPRFZ3 putative frizzled receptor 3	FALSE	FALSE	FALSE
Anogam_AGAP000169	1.89646345777342	1.0213990289114	1.85673121286855	0.0633494044609847	0.301940768053855	Female vs Male Oenocytes	Female Oenocytes	41.7449	Male Oenocytes	11.5528	fanconi anemia group M protein	FALSE	FALSE	FALSE
Anogam_AGAP000170	0.397113942161241	0.273499327559638	1.45197410796064	0.146508804736504	0.481869652086017	Female vs Male Oenocytes	Female Oenocytes	746.807	Male Oenocytes	586.631	NADH dehydrogenase (ubiquinone) Fe-S protein 7	FALSE	FALSE	FALSE
Anogam_AGAP000171	-0.0567591193895933	0.362650057818388	-0.156512092486741	0.87562938827847	0.970090441142324	Female vs Male Oenocytes	Female Oenocytes	690.233	Male Oenocytes	732.258	E3 ubiquitin-protein ligase	FALSE	FALSE	FALSE
Anogam_AGAP000172	-1.60087802537489	0.379705231330356	-4.21610737299027	2.48555449530136e-05	0.00101578323470629	Female vs Male Oenocytes	Female Oenocytes	46.6695	Male Oenocytes	146.489	methyltransferase	FALSE	FALSE	FALSE
Anogam_AGAP000173	0.573712473771692	0.263691272850263	2.17569761627065	0.0295778785679902	0.19443442655547	Female vs Male Oenocytes	Female Oenocytes	593.473	Male Oenocytes	410.015		FALSE	FALSE	FALSE
Anogam_AGAP000175	0.435271186541205	0.30412011453882	1.43124760820661	0.152359263483592	0.493132272649185	Female vs Male Oenocytes	Female Oenocytes	202.069	Male Oenocytes	153.751	stromal interaction molecule	FALSE	FALSE	FALSE
Anogam_AGAP000177	-1.93459476414312	3.59725157958313	-0.537798016442128	0.59071650154249	NA	Female vs Male Oenocytes	Female Oenocytes	0.408217	Male Oenocytes	1.61363	CPR128 cuticular protein RR-2 family 128	FALSE	FALSE	FALSE
Anogam_AGAP000178	0.46671167499276	0.434571375096776	1.07395862161613	0.282841227501328	0.664491284362126	Female vs Male Oenocytes	Female Oenocytes	487.983	Male Oenocytes	358.518	splicing factor 3B subunit 1	FALSE	FALSE	FALSE
Anogam_AGAP000179	1.16607866289453	0.43857755339056	2.65877415266649	0.00784255155030287	0.0834788750793745	Female vs Male Oenocytes	Female Oenocytes	346.533	Male Oenocytes	157.839	Amidophosphoribosyltransferase	FALSE	FALSE	FALSE
Anogam_AGAP000180	1.11571784183394	0.488673019642131	2.28315826122549	0.0224210477281277	0.163670431622258	Female vs Male Oenocytes	Female Oenocytes	768.667	Male Oenocytes	366.082	phosphoribosylaminoimidazole carboxylase	FALSE	FALSE	FALSE
Anogam_AGAP000181	-1.4127428732376	0.769602244979793	-1.83567925178635	0.0664051083133351	0.311550638014955	Female vs Male Oenocytes	Female Oenocytes	125.791	Male Oenocytes	339.379	riboflavin transporter 2	FALSE	FALSE	FALSE
Anogam_AGAP000182	-0.388509612579963	0.55951042720171	-0.69437421304733	0.487447561029217	0.824101409043581	Female vs Male Oenocytes	Female Oenocytes	319.333	Male Oenocytes	437.255		FALSE	FALSE	FALSE
Anogam_AGAP000183	-0.543889146132826	0.626311697143549	-0.86840010910441	0.385175335157875	0.752167378730865	Female vs Male Oenocytes	Female Oenocytes	104.944	Male Oenocytes	158.692		FALSE	FALSE	FALSE
Anogam_AGAP000184	-1.22175020642704	0.50513326585825	-2.41866907013384	0.0155774046540362	0.129400546742426	Female vs Male Oenocytes	Female Oenocytes	10546.7	Male Oenocytes	25573.2	malate dehydrogenase (oxaloacetate-decarboxylating)(NADP+)	FALSE	FALSE	FALSE
Anogam_AGAP000185	0.0476101557659669	0.394185345476969	0.120781140933482	0.903864388089784	0.979369865713125	Female vs Male Oenocytes	Female Oenocytes	114.174	Male Oenocytes	114.63	double stranded RNA-specific editase	FALSE	FALSE	FALSE
Anogam_AGAP000186	2.01285325413062	2.09927395096528	0.958833054259108	0.337642854479876	NA	Female vs Male Oenocytes	Female Oenocytes	6.84848	Male Oenocytes	1.76244		FALSE	FALSE	FALSE
Anogam_AGAP000187	-0.550661186367981	0.272207764207195	-2.02294445190342	0.0430788748486919	0.240741838981708	Female vs Male Oenocytes	Female Oenocytes	291.668	Male Oenocytes	438.46		FALSE	FALSE	FALSE
Anogam_AGAP000188	-0.107726570086053	0.624244659793366	-0.172571071928291	0.862988591959811	0.965980865262181	Female vs Male Oenocytes	Female Oenocytes	140.616	Male Oenocytes	152.648	Uridine phosphorylase	FALSE	FALSE	FALSE
Anogam_AGAP000189	0.50662191756242	0.413964696812434	1.22382879859914	0.221016817948674	0.597813514026475	Female vs Male Oenocytes	Female Oenocytes	99.7419	Male Oenocytes	71.7297	transcription initiation factor TFIID subunit 3	FALSE	FALSE	FALSE
Anogam_AGAP000190	2.57375454607638	3.97333410837259	0.647756890278363	0.517142202070159	NA	Female vs Male Oenocytes	Female Oenocytes	1.45738	Male Oenocytes	0		FALSE	FALSE	FALSE
Anogam_AGAP000191	0.329161756550487	0.820296442318575	0.40127171052956	0.688220089194653	0.911125008342444	Female vs Male Oenocytes	Female Oenocytes	437.53	Male Oenocytes	366.456		FALSE	FALSE	FALSE
Anogam_AGAP000192	4.18934433798091	1.51559302139349	2.76416180257221	0.00570692325875121	0.0671371688798293	Female vs Male Oenocytes	Female Oenocytes	39.6981	Male Oenocytes	2.13736	CYP4C26 cytochrome P450	FALSE	FALSE	FALSE
Anogam_AGAP000193	-1.23396113827818	4.0804728567969	-0.302406407684529	0.762342270655386	NA	Female vs Male Oenocytes	Female Oenocytes	0	Male Oenocytes	0.360706	CYP4C37 cytochrome P450	FALSE	FALSE	FALSE
Anogam_AGAP000194	-1.36767810248593	4.02304718421624	-0.339960741164506	0.73388609294624	NA	Female vs Male Oenocytes	Female Oenocytes	0.360037	Male Oenocytes	1.03929	CYP4C25 cytochrome P450	FALSE	FALSE	FALSE
Anogam_AGAP000195	0.0816645130739054	0.387336283623701	0.210836207519466	0.833015084026462	0.959778248987011	Female vs Male Oenocytes	Female Oenocytes	548.18	Male Oenocytes	527.128	cytoplasmic FMR1 interacting protein	FALSE	FALSE	FALSE
Anogam_AGAP000196	1.61835825702135	0.947653428841511	1.70775328592412	0.0876821302644626	0.367655431911094	Female vs Male Oenocytes	Female Oenocytes	23.671	Male Oenocytes	7.87181		FALSE	FALSE	FALSE
Anogam_AGAP000198	0.513052259997187	1.00217516048093	0.511938711144049	0.608693904356374	0.878304654080769	Female vs Male Oenocytes	Female Oenocytes	32.8319	Male Oenocytes	23.9513	Cht5-5 chitinase	FALSE	FALSE	FALSE
Anogam_AGAP000199	0.0919885183568377	0.490477063147672	0.18754907266508	0.851230151789085	0.964978216171848	Female vs Male Oenocytes	Female Oenocytes	165.174	Male Oenocytes	159.131	phospholipase D3-4	FALSE	FALSE	FALSE
Anogam_AGAP000200	-0.0400374275928053	1.3751427837138	-0.0291151057671827	0.976772788245378	0.994958948266764	Female vs Male Oenocytes	Female Oenocytes	15.1989	Male Oenocytes	16.4354		FALSE	FALSE	FALSE
Anogam_AGAP000201	-0.0368767636899998	0.511132668949968	-0.0721471467784607	0.942484806253443	0.988225181703765	Female vs Male Oenocytes	Female Oenocytes	293.496	Male Oenocytes	313.283	26S proteasome non-ATPase regulatory subunit 9	FALSE	FALSE	FALSE
Anogam_AGAP000202	0.0624831695929194	0.559908124137635	0.111595397350512	0.911144221609333	0.981350931318435	Female vs Male Oenocytes	Female Oenocytes	41.8718	Male Oenocytes	41.1525		FALSE	FALSE	FALSE
Anogam_AGAP000203	-0.672285458719125	0.584729666375365	-1.14973721597966	0.250252121150133	0.629769964440051	Female vs Male Oenocytes	Female Oenocytes	136.933	Male Oenocytes	221.979	inositol-12C42C5-trisphosphate 5-phosphatase	FALSE	FALSE	FALSE
Anogam_AGAP000204	1.61427132831233	1.31681680414054	1.22588907070177	0.220240422202277	0.596689706158246	Female vs Male Oenocytes	Female Oenocytes	83.0309	Male Oenocytes	28.2001		FALSE	FALSE	FALSE
Anogam_AGAP000205	0.252218362801081	0.675940333662902	0.373137021479864	0.709046466042886	0.920992222221613	Female vs Male Oenocytes	Female Oenocytes	50.3967	Male Oenocytes	43.1427		FALSE	FALSE	FALSE
Anogam_AGAP000206	0.394416481994108	0.622962157777327	0.633130724025598	0.526648280117979	0.84252223694192	Female vs Male Oenocytes	Female Oenocytes	60.1769	Male Oenocytes	47.2421		FALSE	FALSE	FALSE
Anogam_AGAP000209	3.80437026342865	2.28012435885654	1.66849244369132	0.0952180107099091	0.383197135570716	Female vs Male Oenocytes	Female Oenocytes	21.0338	Male Oenocytes	1.44289	glutamate receptor binding protein	FALSE	FALSE	FALSE
Anogam_AGAP000210	-2.76086379903108	0.913465162396357	-3.02240732617357	0.00250772855720989	0.0397486694675511	Female vs Male Oenocytes	Female Oenocytes	24.3462	Male Oenocytes	170.978	triacylglycerol lipase	FALSE	FALSE	FALSE
Anogam_AGAP000211	-1.9972021219672	0.701843953858723	-2.8456498214263	0.00443209045362122	0.0564875715121494	Female vs Male Oenocytes	Female Oenocytes	73.7631	Male Oenocytes	303.393	triacylglycerol lipase	FALSE	FALSE	FALSE
Anogam_AGAP000213	1.91009363481296	2.14382133775372	0.890976128082733	0.372941977101573	NA	Female vs Male Oenocytes	Female Oenocytes	6.33488	Male Oenocytes	1.73805	ankyrin repeat and SOCS box protein 17	FALSE	FALSE	FALSE
Anogam_AGAP000214	0.856956068799956	0.949686704420401	0.902356603299991	0.366867466109681	0.738671020010312	Female vs Male Oenocytes	Female Oenocytes	32.8316	Male Oenocytes	18.2301	guanylate cyclase soluble subunit beta	FALSE	FALSE	FALSE
Anogam_AGAP000215	2.17684421354975	3.99417999378432	0.545004035105409	0.585750742398689	NA	Female vs Male Oenocytes	Female Oenocytes	1.07296	Male Oenocytes	0	homeobox protein OTX	FALSE	FALSE	FALSE
Anogam_AGAP000216	-3.90592758638589	3.94583981029046	-0.989884986258062	0.322230338719669	NA	Female vs Male Oenocytes	Female Oenocytes	0	Male Oenocytes	3.13017		FALSE	FALSE	FALSE
Anogam_AGAP000217	3.39939486231686	2.05688012577233	1.65269469023647	0.0983930155909049	NA	Female vs Male Oenocytes	Female Oenocytes	10.2668	Male Oenocytes	1.01516		FALSE	FALSE	FALSE
Anogam_AGAP000218	-0.481962901833428	0.742652615069344	-0.648974893582546	0.516354604227461	0.837233896202021	Female vs Male Oenocytes	Female Oenocytes	239.074	Male Oenocytes	349.87		FALSE	FALSE	FALSE
Anogam_AGAP000219	1.5745432188397	4.03873968642138	0.389860040777935	0.696640043350389	NA	Female vs Male Oenocytes	Female Oenocytes	0.709576	Male Oenocytes	0	Tektin-3	FALSE	FALSE	FALSE
Anogam_AGAP000220	-0.550321107861469	0.398334433345538	-1.38155545138145	0.167108240509016	0.518765655193869	Female vs Male Oenocytes	Female Oenocytes	491.158	Male Oenocytes	739.732	xylulokinase	FALSE	FALSE	FALSE
Anogam_AGAP000222	0.82823021182829	0.511320430191851	1.6197870511795	0.105278028793401	0.402596475385814	Female vs Male Oenocytes	Female Oenocytes	313.596	Male Oenocytes	179.479		FALSE	FALSE	FALSE
Anogam_AGAP000223	0.694478802966864	0.534342175920593	1.29968928949016	0.193707482724941	0.559355092000284	Female vs Male Oenocytes	Female Oenocytes	91.725	Male Oenocytes	58.1401		FALSE	FALSE	FALSE
Anogam_AGAP000225	-0.0244561836344593	2.10001416545312	-0.0116457231750065	0.990708267308326	NA	Female vs Male Oenocytes	Female Oenocytes	4.82641	Male Oenocytes	4.84968	netrin 1	FALSE	FALSE	FALSE
Anogam_AGAP000226	2.89550967750355	3.96011508909387	0.731168062634787	0.464676505163846	NA	Female vs Male Oenocytes	Female Oenocytes	1.73732	Male Oenocytes	0	Or41 odorant receptor 41	FALSE	FALSE	FALSE
Anogam_AGAP000228	0.391485016870915	0.929661673801344	0.421104825447037	0.67367853809921	0.907512947272645	Female vs Male Oenocytes	Female Oenocytes	25.4863	Male Oenocytes	19.8228	netrin 1	FALSE	FALSE	FALSE
Anogam_AGAP000230	2.93487001941891	3.95868850807017	0.741374324712816	0.458466507711389	NA	Female vs Male Oenocytes	Female Oenocytes	1.81727	Male Oenocytes	0	Or52 odorant receptor 52	FALSE	FALSE	FALSE
Anogam_AGAP000232	-0.155295947916023	1.53668593675498	-0.101059002494655	0.919503622643114	0.982864376472303	Female vs Male Oenocytes	Female Oenocytes	10.9699	Male Oenocytes	12.1614	regulator of G-protein signaling	FALSE	FALSE	FALSE
Anogam_AGAP000233	0.685088502239948	0.668705991720839	1.02449882417974	0.305599725920662	0.687092976351891	Female vs Male Oenocytes	Female Oenocytes	87.1113	Male Oenocytes	54.8306		FALSE	FALSE	FALSE
Anogam_AGAP000234	0.121399287143993	0.41084966785123	0.295483473989207	0.767624574909264	0.940112260550077	Female vs Male Oenocytes	Female Oenocytes	128.899	Male Oenocytes	122.023		FALSE	FALSE	FALSE
Anogam_AGAP000235	0.472244380696113	0.376222729458484	1.25522554518659	0.209396894672245	0.581239170808718	Female vs Male Oenocytes	Female Oenocytes	1743.33	Male Oenocytes	1279.39	Thymosin	FALSE	FALSE	FALSE
Anogam_AGAP000236	-0.218487603920945	0.420513267991111	-0.519573627164513	0.603360783512947	0.876129389277435	Female vs Male Oenocytes	Female Oenocytes	323.599	Male Oenocytes	386.531	32C5-cyclic-nucleotide phosphodiesterase	FALSE	FALSE	FALSE
Anogam_AGAP000237	0.0350721331287001	0.665781068543517	0.052678177235386	0.957988326921923	0.992237966420474	Female vs Male Oenocytes	Female Oenocytes	37.6171	Male Oenocytes	37.5014	cAMP response element-binding protein (CREB)	FALSE	FALSE	FALSE
Anogam_AGAP000238	-0.043883850508858	0.717582646263706	-0.0611551167483654	0.951235674434638	0.990895855842934	Female vs Male Oenocytes	Female Oenocytes	108.296	Male Oenocytes	115.378		FALSE	FALSE	FALSE
Anogam_AGAP000239	-1.21270849171037	1.14776392458392	-1.05658355846129	0.290701687443275	0.67155059510165	Female vs Male Oenocytes	Female Oenocytes	11.5748	Male Oenocytes	26.9128	allantoinase	FALSE	FALSE	FALSE
Anogam_AGAP000240	0.744969361124672	0.505989560418075	1.47230184059359	0.140939386498971	0.472176694544881	Female vs Male Oenocytes	Female Oenocytes	50.785	Male Oenocytes	31.2128	HtrA serine peptidase 2	FALSE	FALSE	FALSE
Anogam_AGAP000241	0.016812627559181	0.606043487906966	0.0277416190333885	0.977868229276954	0.995068998825109	Female vs Male Oenocytes	Female Oenocytes	491.773	Male Oenocytes	489.222	N-acetylglucosamine kinase	FALSE	FALSE	FALSE
Anogam_AGAP000242	0.475331824488862	0.48292742420068	0.984271757346582	0.324981912069012	0.703770150503143	Female vs Male Oenocytes	Female Oenocytes	144.683	Male Oenocytes	108.312	vesicle transport protein SEC20	FALSE	FALSE	FALSE
Anogam_AGAP000243	1.59093000813893	0.794603431971613	2.0021685587129	0.0452666059851612	0.248721912799676	Female vs Male Oenocytes	Female Oenocytes	382.642	Male Oenocytes	126.849	Rhophilin-2	FALSE	FALSE	FALSE
Anogam_AGAP000244	-0.512978754567077	1.51177287227399	-0.339322635016899	0.734366692809734	0.929929749381763	Female vs Male Oenocytes	Female Oenocytes	7.67126	Male Oenocytes	11.325		FALSE	FALSE	FALSE
Anogam_AGAP000245	0.15278777422691	0.434663932335335	0.351507826761749	0.725207401744103	0.927626467842234	Female vs Male Oenocytes	Female Oenocytes	305.763	Male Oenocytes	279.387		FALSE	FALSE	FALSE
Anogam_AGAP000246	0.728220608634745	1.23542048245734	0.589451623131796	0.555558355298523	NA	Female vs Male Oenocytes	Female Oenocytes	8.19858	Male Oenocytes	4.90766		FALSE	FALSE	FALSE
Anogam_AGAP000247	0.947522525234613	0.584506699325049	1.6210635846069	0.105004002770654	0.402001780358981	Female vs Male Oenocytes	Female Oenocytes	55.1474	Male Oenocytes	29.2177		FALSE	FALSE	FALSE
Anogam_AGAP000248	1.08378692906216	0.590537287455683	1.83525571049312	0.0664678100560602	0.311550638014955	Female vs Male Oenocytes	Female Oenocytes	210.755	Male Oenocytes	101.196	protein phosphatase 1H	FALSE	FALSE	FALSE
Anogam_AGAP000249	1.04211077601577	0.511098939753963	2.03896094270402	0.0414539257630165	0.235488811276643	Female vs Male Oenocytes	Female Oenocytes	24944.8	Male Oenocytes	12235.4	mannosyl-glycoprotein endo-beta-N-acetylglucosaminidase	FALSE	FALSE	FALSE
Anogam_AGAP000250	-0.121025217924971	0.366421559884541	-0.330289565829876	0.741181176242293	0.932194187491908	Female vs Male Oenocytes	Female Oenocytes	219.653	Male Oenocytes	247.551	STAGA complex 65 subunit gamma	FALSE	FALSE	FALSE
Anogam_AGAP000251	-0.902961003619435	0.67689260780391	-1.33397970846361	0.182210506738199	0.544065175049271	Female vs Male Oenocytes	Female Oenocytes	43.8877	Male Oenocytes	83.3013		FALSE	FALSE	FALSE
Anogam_AGAP000252	0.707508479112051	0.61541831674453	1.1496383189481	0.250292868747993	0.629769964440051	Female vs Male Oenocytes	Female Oenocytes	336.528	Male Oenocytes	210.863	oligopeptidase A	FALSE	FALSE	FALSE
Anogam_AGAP000253	0.0164550169516224	1.90350833806662	0.0086445730877836	0.993102714502764	NA	Female vs Male Oenocytes	Female Oenocytes	3.47669	Male Oenocytes	3.3769	solute carrier family 25	FALSE	FALSE	FALSE
Anogam_AGAP000254	-0.510938763102899	0.995603309145458	-0.513195123408584	0.607814836839462	0.877945178094872	Female vs Male Oenocytes	Female Oenocytes	21.7708	Male Oenocytes	31.3788	potassium voltage-gated channel Shaker-related subfamily A	FALSE	FALSE	FALSE
Anogam_AGAP000255	-0.190535543265398	0.465981950431328	-0.408890393906959	0.682620098892863	0.909794033789489	Female vs Male Oenocytes	Female Oenocytes	121.885	Male Oenocytes	143.285	disks large protein 1	FALSE	FALSE	FALSE
Anogam_AGAP000256	0.262782472063691	2.70363940749586	0.0971958284581611	0.92257088076986	NA	Female vs Male Oenocytes	Female Oenocytes	5.3985	Male Oenocytes	4.539	IR93a ionotropic receptor IR93a	FALSE	FALSE	FALSE
Anogam_AGAP000258	0.672051141679832	0.724304769281575	0.927856850019679	0.353481829879894	0.726172343419981	Female vs Male Oenocytes	Female Oenocytes	35.0917	Male Oenocytes	22.3879	Hexosyltransferase	FALSE	FALSE	FALSE
Anogam_AGAP000260	0.210686924550148	0.488825817614939	0.43100613134168	0.666463912306638	0.903624652366364	Female vs Male Oenocytes	Female Oenocytes	976.007	Male Oenocytes	879.806	mitochondrial ATP synthase epsilon chain	FALSE	FALSE	FALSE
Anogam_AGAP000261	0.576650691456379	0.35415079646184	1.62826315009717	0.103469099542782	0.400548028703316	Female vs Male Oenocytes	Female Oenocytes	304.542	Male Oenocytes	209.609	DnaJ-like protein subfamily C	FALSE	FALSE	FALSE
Anogam_AGAP000262	0.70980655689929	1.35712486215507	0.523022292710884	0.600958739941815	NA	Female vs Male Oenocytes	Female Oenocytes	5.1201	Male Oenocytes	3.21087		FALSE	FALSE	FALSE
Anogam_AGAP000264	0.539982036459473	0.415615348241483	1.29923507094769	0.193863269170032	0.559417413844542	Female vs Male Oenocytes	Female Oenocytes	99.4465	Male Oenocytes	70.7014		FALSE	FALSE	FALSE
Anogam_AGAP000266	1.70497109759478	1.98824697832736	0.85752480259224	0.391154913479811	0.757304490024839	Female vs Male Oenocytes	Female Oenocytes	13.6516	Male Oenocytes	4.213		FALSE	FALSE	FALSE
Anogam_AGAP000267	1.19301960780916	0.69572513871417	1.71478582765326	0.0863845008553017	0.36490190149587	Female vs Male Oenocytes	Female Oenocytes	73.7028	Male Oenocytes	32.8057		FALSE	FALSE	FALSE
Anogam_AGAP000268	1.04973530013719	0.726813298266815	1.44429842249781	0.148655049342086	0.485450790051522	Female vs Male Oenocytes	Female Oenocytes	1475.67	Male Oenocytes	714.293		FALSE	FALSE	FALSE
Anogam_AGAP000269	0.162430512232664	0.394196360016963	0.412054825228915	0.680299238952005	0.909794033789489	Female vs Male Oenocytes	Female Oenocytes	217.335	Male Oenocytes	198.644	ubiquitin carboxyl-terminal hydrolase 30	FALSE	FALSE	FALSE
Anogam_AGAP000270	0.627762556824677	0.305918653319978	2.05205714006613	0.0401641096080643	0.231563727689327	Female vs Male Oenocytes	Female Oenocytes	396.133	Male Oenocytes	263.275	nucleolar protein 53	FALSE	FALSE	FALSE
Anogam_AGAP000271	0.849480448368892	0.427966581708232	1.98492238571102	0.0471531073706032	0.254822103347455	Female vs Male Oenocytes	Female Oenocytes	243.883	Male Oenocytes	137.668		FALSE	FALSE	FALSE
Anogam_AGAP000272	0.903444644092029	0.324141459787245	2.78719249516868	0.00531668867392812	0.0640169425648906	Female vs Male Oenocytes	Female Oenocytes	342.388	Male Oenocytes	188.731	transcription initiation factor TFIID subunit 9 - adenylate kinase	FALSE	FALSE	FALSE
Anogam_AGAP000273	0.0893767847382516	0.263004961060087	0.339829273098131	0.73398510170511	0.929929749381763	Female vs Male Oenocytes	Female Oenocytes	459.647	Male Oenocytes	445.842		FALSE	FALSE	FALSE
Anogam_AGAP000274	0.197167368658515	0.669864841030543	0.294339031669712	0.76849884994656	0.940260013296801	Female vs Male Oenocytes	Female Oenocytes	187.716	Male Oenocytes	168.772		FALSE	FALSE	FALSE
Anogam_AGAP000275	-0.130774133779655	0.484888229389326	-0.26969954280877	0.787391412302081	0.947918558942801	Female vs Male Oenocytes	Female Oenocytes	517.062	Male Oenocytes	577.294	epidermal retinal dehydrogenase	FALSE	FALSE	FALSE
Anogam_AGAP000277	0.900830506698092	1.22390061131868	0.736032401950922	0.46171097909024	NA	Female vs Male Oenocytes	Female Oenocytes	6.45885	Male Oenocytes	3.57853	EF-hand calcium-binding domain-containing protein 1	FALSE	FALSE	FALSE
Anogam_AGAP000278	-0.956810238471946	0.584784239085917	-1.636176515235	0.101802650038271	0.397742667187062	Female vs Male Oenocytes	Female Oenocytes	142.649	Male Oenocytes	285.851	OBP9 odorant-binding protein 9	FALSE	FALSE	FALSE
Anogam_AGAP000279	0.912012703318594	0.812458688715726	1.12253424818465	0.26163535422154	0.641278697554744	Female vs Male Oenocytes	Female Oenocytes	25.4272	Male Oenocytes	13.5228	OBP8 odorant-binding protein 8	FALSE	FALSE	FALSE
Anogam_AGAP000280	0.814326589133924	1.22753826039551	0.663381839415377	0.507086033934818	0.833351303466939	Female vs Male Oenocytes	Female Oenocytes	65.2238	Male Oenocytes	37.2123	guanylate cyclase soluble subunit alpha	FALSE	FALSE	FALSE
Anogam_AGAP000281	0.568005646419414	0.26430802000813	2.14902917589085	0.0316320872368432	0.201180074826323	Female vs Male Oenocytes	Female Oenocytes	416.621	Male Oenocytes	288.294		FALSE	FALSE	FALSE
Anogam_AGAP000283	0.927963592753184	0.73194065771903	1.2678126060725	0.204864879300467	0.575408504488423	Female vs Male Oenocytes	Female Oenocytes	30.6149	Male Oenocytes	16.4362		FALSE	FALSE	FALSE
Anogam_AGAP000284	0.0833444323886302	0.863593037250424	0.0965089212089861	0.923116388901132	0.984174047307023	Female vs Male Oenocytes	Female Oenocytes	47.9332	Male Oenocytes	46.6819	CYP315A1 cytochrome P450	FALSE	FALSE	FALSE
Anogam_AGAP000285	0.343597334860534	0.238354160264182	1.44154116915646	0.149431855247001	0.487221582503519	Female vs Male Oenocytes	Female Oenocytes	712.429	Male Oenocytes	577.412		FALSE	FALSE	FALSE
Anogam_AGAP000286	0.671020919954071	0.496223207456417	1.35225622234326	0.176293363666744	0.534805947344725	Female vs Male Oenocytes	Female Oenocytes	134.034	Male Oenocytes	86.8034		FALSE	FALSE	FALSE
Anogam_AGAP000287	0.32210692563314	0.507865532416823	0.634236633662265	0.525926403243525	0.841879358094402	Female vs Male Oenocytes	Female Oenocytes	182.048	Male Oenocytes	148.888	prostaglandin reductase 12C gene	FALSE	FALSE	FALSE
Anogam_AGAP000288	0.855628646118301	0.575171362051502	1.48760648142577	0.136854703152495	0.465325115478466	Female vs Male Oenocytes	Female Oenocytes	155.98	Male Oenocytes	89.3526	prostaglandin reductase 1	FALSE	FALSE	FALSE
Anogam_AGAP000289	0.137609362692821	0.451901794991154	0.304511653235444	0.760738116037956	0.938065312719263	Female vs Male Oenocytes	Female Oenocytes	128.708	Male Oenocytes	120.311	prostaglandin reductase 12C gene 2	FALSE	FALSE	FALSE
Anogam_AGAP000290	1.0466575219757	0.583005267152628	1.79527970148114	0.0726091474480317	0.329558735250299	Female vs Male Oenocytes	Female Oenocytes	2496.42	Male Oenocytes	1218.06	CLIPA27 CLIP-domain serine protease	FALSE	FALSE	FALSE
Anogam_AGAP000291	0.597736097550509	0.379992391684214	1.57302122524402	0.115713903571934	0.425113636624255	Female vs Male Oenocytes	Female Oenocytes	271.048	Male Oenocytes	182.781	Translocase of inner mitochondrial membrane 44 homolog (yeast)	FALSE	FALSE	FALSE
Anogam_AGAP000292	0.983970975618548	0.527802950740557	1.86427714024324	0.0622827953204402	0.30058908485975	Female vs Male Oenocytes	Female Oenocytes	80.1784	Male Oenocytes	41.4008		FALSE	FALSE	FALSE
Anogam_AGAP000293	-0.638188525853617	1.43904236795087	-0.443481401289363	0.657417568947535	0.901275125511944	Female vs Male Oenocytes	Female Oenocytes	6.72555	Male Oenocytes	11.0486	IR100h ionotropic receptor IR100h	FALSE	FALSE	FALSE
Anogam_AGAP000294	4.9644443581412	3.16166932462605	1.57019721179361	0.116369238030739	NA	Female vs Male Oenocytes	Female Oenocytes	7.62977	Male Oenocytes	0		FALSE	FALSE	FALSE
Anogam_AGAP000295	-1.65660585074101	1.78527220179699	-0.927929001008098	0.353444399712603	0.726172343419981	Female vs Male Oenocytes	Female Oenocytes	7.05744	Male Oenocytes	22.9453		FALSE	FALSE	FALSE
Anogam_AGAP000296	0.0204002821234613	0.904862304467307	0.0225451784462067	0.982013073957797	0.996360723191779	Female vs Male Oenocytes	Female Oenocytes	439.889	Male Oenocytes	429.56		FALSE	FALSE	FALSE
Anogam_AGAP000297	0.277983099401138	0.398764159335933	0.697111545491117	0.485732989358453	0.822158832287362	Female vs Male Oenocytes	Female Oenocytes	578.391	Male Oenocytes	484.627		FALSE	FALSE	FALSE
Anogam_AGAP000298	1.27382289125835	1.50163155170885	0.848292572041886	0.396275053300391	0.760539939548885	Female vs Male Oenocytes	Female Oenocytes	14.5343	Male Oenocytes	6.36484		FALSE	FALSE	FALSE
Anogam_AGAP000299	-0.159651366581575	0.95237909548624	-0.167634261753786	0.866871015613278	0.96682150974142	Female vs Male Oenocytes	Female Oenocytes	12.8386	Male Oenocytes	14.9178		FALSE	FALSE	FALSE
Anogam_AGAP000300	0.556776472619457	0.309145589081851	1.80101703625485	0.0717001948107879	0.32729715691882	Female vs Male Oenocytes	Female Oenocytes	747.828	Male Oenocytes	522.786	Bifunctional pyrimidine biosynthesis protein (PyrABCN)	FALSE	FALSE	FALSE
Anogam_AGAP000301	0.834608743840512	0.54219712026252	1.53930869908791	0.123728951244209	0.440986133718056	Female vs Male Oenocytes	Female Oenocytes	137.196	Male Oenocytes	79.9342		FALSE	FALSE	FALSE
Anogam_AGAP000303	-0.742924146615107	1.16848156292784	-0.635803054310568	0.524904796466004	0.841379232362355	Female vs Male Oenocytes	Female Oenocytes	11.1428	Male Oenocytes	18.9358		FALSE	FALSE	FALSE
Anogam_AGAP000304	-0.415385834227787	0.397451525214768	-1.04512326126646	0.295966004470465	0.676189955431399	Female vs Male Oenocytes	Female Oenocytes	575.542	Male Oenocytes	792.162	Protein twisted gastrulation	FALSE	FALSE	FALSE
Anogam_AGAP000305	0.96458744231512	0.674887376960924	1.42925690306839	0.152930407992707	0.493538357969252	Female vs Male Oenocytes	Female Oenocytes	46579.1	Male Oenocytes	23930.3	SPARC	FALSE	FALSE	FALSE
Anogam_AGAP000306	0.490088175752484	0.395129332513748	1.24032344709673	0.214855783286079	0.589636607180797	Female vs Male Oenocytes	Female Oenocytes	200.541	Male Oenocytes	145.947	Histone H2A	FALSE	FALSE	FALSE
Anogam_AGAP000307	0.046212385157622	0.515737144874527	0.0896045313332336	0.928601483411705	0.985652309919423	Female vs Male Oenocytes	Female Oenocytes	83.7577	Male Oenocytes	83.5546	Integrin alpha-PS1	FALSE	FALSE	FALSE
Anogam_AGAP000308	0.861768877380291	0.301075761894848	2.86229908364815	0.00420579821245772	0.0553663681888354	Female vs Male Oenocytes	Female Oenocytes	1528.81	Male Oenocytes	863.977	proteasome activator subunit 3 (PA28 gamma)	FALSE	FALSE	FALSE
Anogam_AGAP000309	2.19379052635739	3.36496969094323	0.651949565032325	0.514433708744611	NA	Female vs Male Oenocytes	Female Oenocytes	2.22552	Male Oenocytes	0.506901		FALSE	FALSE	FALSE
Anogam_AGAP000310	0.217153019868813	0.498680035128447	0.435455611959441	0.663231751617969	0.902520233279547	Female vs Male Oenocytes	Female Oenocytes	344.458	Male Oenocytes	301.593	mitogen-activated protein kinase kinase 3	FALSE	FALSE	FALSE
Anogam_AGAP000311	-0.0590635942166468	0.514676930891153	-0.114758580910902	0.908636479734808	0.980433340693897	Female vs Male Oenocytes	Female Oenocytes	293.96	Male Oenocytes	310.017	UNC93-like protein MFSD11	FALSE	FALSE	FALSE
Anogam_AGAP000312	-0.439207576141383	0.260824731313313	-1.68391844565456	0.0921974310046052	0.377472028265774	Female vs Male Oenocytes	Female Oenocytes	287.081	Male Oenocytes	399.729		FALSE	FALSE	FALSE
Anogam_AGAP000313	-0.343518438859652	0.338703005894248	-1.01421727260049	0.310479088462133	0.692099716142534	Female vs Male Oenocytes	Female Oenocytes	156.199	Male Oenocytes	203.821	alanine-glyoxylate aminotransferase 2-like	FALSE	FALSE	FALSE
Anogam_AGAP000314	0.794002363378261	0.860730139633396	0.92247538086263	0.356280666162247	0.7290683459716	Female vs Male Oenocytes	Female Oenocytes	22.9296	Male Oenocytes	13.3743		FALSE	FALSE	FALSE
Anogam_AGAP000315	-0.910092788079779	0.770195437874344	-1.18163876767634	0.237349064080875	0.614571011726967	Female vs Male Oenocytes	Female Oenocytes	102.429	Male Oenocytes	199.601	CLIPC6 CLIP-domain serine protease	FALSE	FALSE	FALSE
Anogam_AGAP000316	0.801078710101333	0.450910198687704	1.77658148436814	0.0756371242652345	0.337580428299573	Female vs Male Oenocytes	Female Oenocytes	158.138	Male Oenocytes	92.8187		FALSE	FALSE	FALSE
Anogam_AGAP000317	2.73367081796292	0.843190394263112	3.24205640453477	0.00118670532883956	0.0224042920710045	Female vs Male Oenocytes	Female Oenocytes	212.482	Male Oenocytes	32.1734		FALSE	FALSE	FALSE
Anogam_AGAP000319	0.156973378385251	0.496439830452186	0.316198195141334	0.751852077595766	0.935667286094958	Female vs Male Oenocytes	Female Oenocytes	152.463	Male Oenocytes	138.766	Katanin p80 WD40 repeat-containing subunit B1	FALSE	FALSE	FALSE
Anogam_AGAP000320	0.947645814963894	0.262674961255933	3.60767471110643	0.000308953493110761	0.00793669259245256	Female vs Male Oenocytes	Female Oenocytes	1139.26	Male Oenocytes	605.15	dynein intermediate chain2C cytosolic	FALSE	FALSE	FALSE
Anogam_AGAP000321	0.566068741579739	0.535486640252118	1.05711085772975	0.290460996456719	0.67155059510165	Female vs Male Oenocytes	Female Oenocytes	4653.06	Male Oenocytes	3167.46		FALSE	FALSE	FALSE
Anogam_AGAP000322	-0.174292186112839	0.29264770850955	-0.595569967045041	0.551462545005325	0.849559439964252	Female vs Male Oenocytes	Female Oenocytes	828.876	Male Oenocytes	966.27	Adaptin ear-binding coat-associated protein 1	FALSE	FALSE	FALSE
Anogam_AGAP000323	-0.878125661807899	0.323380601304624	-2.71545559092058	0.00661846522104821	0.0731264952110604	Female vs Male Oenocytes	Female Oenocytes	145.236	Male Oenocytes	274.847		FALSE	FALSE	FALSE
Anogam_AGAP000324	0.659797775411892	0.623785871899396	1.05773119452488	0.290178009280047	0.671312379851315	Female vs Male Oenocytes	Female Oenocytes	106.865	Male Oenocytes	70.434	tRNA (guanine9-N1)-methyltransferase	FALSE	FALSE	FALSE
Anogam_AGAP000325	0.875310091290995	0.251367235624631	3.48219643310278	0.000497318734342345	0.0116875645281009	Female vs Male Oenocytes	Female Oenocytes	522.652	Male Oenocytes	292.187	lysyl-tRNA synthetase2C class II	FALSE	FALSE	FALSE
Anogam_AGAP000326	0.639290607454759	0.512873188826479	1.24648864745209	0.21258505446187	0.585616002762315	Female vs Male Oenocytes	Female Oenocytes	146.147	Male Oenocytes	95.841		FALSE	FALSE	FALSE
Anogam_AGAP000327	3.74571431127157	0.910373103452204	4.11448261934315	3.88048794508615e-05	0.00147894551794744	Female vs Male Oenocytes	Female Oenocytes	1487.85	Male Oenocytes	115.253	tyrosine aminotransferase	FALSE	FALSE	FALSE
Anogam_AGAP000328	0.206126659456996	0.240527917078163	0.856976029896822	0.391458132028369	0.757503099774184	Female vs Male Oenocytes	Female Oenocytes	359.327	Male Oenocytes	320.03	AMME syndrome candidate gene 1 protein	FALSE	FALSE	FALSE
Anogam_AGAP000329	1.22869447712943	0.957632445579822	1.28305435222121	0.199473034692212	0.56778674154628	Female vs Male Oenocytes	Female Oenocytes	34.7963	Male Oenocytes	14.9768	alpha3 nicotinic acetylcholine receptor subunit alpha 3	FALSE	FALSE	FALSE
Anogam_AGAP000330	0.29773542819002	0.574182659194795	0.518537826634384	0.604083075200494	0.876411373430314	Female vs Male Oenocytes	Female Oenocytes	108.338	Male Oenocytes	91.5183		FALSE	FALSE	FALSE
Anogam_AGAP000331	1.45908624765111	0.774897914805622	1.88293995863586	0.0597085052283044	0.293036486353765	Female vs Male Oenocytes	Female Oenocytes	64.2961	Male Oenocytes	24.1668	low density lipoprotein-related protein 2]	FALSE	FALSE	FALSE
Anogam_AGAP000332	0.32835918849226	0.430678535795383	0.762422923830745	0.445807628780317	0.796515219438621	Female vs Male Oenocytes	Female Oenocytes	226.554	Male Oenocytes	183.261	Vir protein virilizer	FALSE	FALSE	FALSE
Anogam_AGAP000334	0.31087529165062	0.48600428745269	0.639655450942666	0.52239662387369	0.841138252530321	Female vs Male Oenocytes	Female Oenocytes	177.349	Male Oenocytes	145.019		FALSE	FALSE	FALSE
Anogam_AGAP000336	0.0234945412145986	0.378717055728692	0.0620371880780299	0.950533217218235	0.990540298864594	Female vs Male Oenocytes	Female Oenocytes	69.6285	Male Oenocytes	70.2757	transcription initiation factor TFIID TATA-box-binding protein	FALSE	FALSE	FALSE
Anogam_AGAP000337	1.13287382846452	0.430080157817132	2.63409926701666	0.00843608201460829	0.0878817888037153	Female vs Male Oenocytes	Female Oenocytes	307.52	Male Oenocytes	142.648	regulator of nonsense transcripts 2	FALSE	FALSE	FALSE
Anogam_AGAP000338	0.486396265968581	0.587626560234771	0.82773022678596	0.407823296854821	0.769120443499393	Female vs Male Oenocytes	Female Oenocytes	69.5112	Male Oenocytes	51.021	phosphomevalonate kinase	FALSE	FALSE	FALSE
Anogam_AGAP000339	0.853993683997775	0.569372722996763	1.49988513587896	0.133644158950606	0.458044067176846	Female vs Male Oenocytes	Female Oenocytes	45.145	Male Oenocytes	25.4957	E3 ubiquitin-protein ligase Hakai	FALSE	FALSE	FALSE
Anogam_AGAP000340	-2.38186859931717	1.99796429904058	-1.1921477277952	0.233203325431394	0.609251141772292	Female vs Male Oenocytes	Female Oenocytes	4.56421	Male Oenocytes	23.2669		FALSE	FALSE	FALSE
Anogam_AGAP000341	-0.351662133816343	2.73855875393077	-0.128411389133641	0.897823418550571	NA	Female vs Male Oenocytes	Female Oenocytes	4.62066	Male Oenocytes	5.84352	GALE2 galectin 2	FALSE	FALSE	FALSE
Anogam_AGAP000342	0.300526249343605	2.24062722495881	0.134125947411502	0.893302981955361	NA	Female vs Male Oenocytes	Female Oenocytes	3.83395	Male Oenocytes	3.14587	inhibin2C beta	FALSE	FALSE	FALSE
Anogam_AGAP000343	0.578356815304335	0.622279118284805	0.929417038608762	0.352673001036041	0.725658597013775	Female vs Male Oenocytes	Female Oenocytes	240.851	Male Oenocytes	162.252		FALSE	FALSE	FALSE
Anogam_AGAP000344	1.34868761470968	1.86682776923963	0.722448871252331	0.470018549325043	0.811487743117007	Female vs Male Oenocytes	Female Oenocytes	15.1597	Male Oenocytes	6.03298	CPR127 cuticular protein RR-1 family 127	FALSE	FALSE	FALSE
Anogam_AGAP000345	-0.0354810849795458	2.34459166768725	-0.0151331617648138	0.98792594472525	NA	Female vs Male Oenocytes	Female Oenocytes	3.00665	Male Oenocytes	3.10794	CPR126 cuticular protein RR-2 family 126	FALSE	FALSE	FALSE
Anogam_AGAP000346	0.319721572406016	0.458238603810049	0.697718546075504	0.485353227442184	0.822139539200581	Female vs Male Oenocytes	Female Oenocytes	291.874	Male Oenocytes	240.276	SPZ1 spaetzle-like cytokine 1	FALSE	FALSE	FALSE
Anogam_AGAP000347	6.01819784470347	0.613119758750962	9.81569711105648	9.63695756651977e-23	4.90328400984526e-19	Female vs Male Oenocytes	Female Oenocytes	1755.55	Male Oenocytes	28.2544	CAPA pyrokinin capa-like	TRUE	FALSE	TRUE
Anogam_AGAP000348	-0.66774207449248	0.905693765944659	-0.737271359923749	0.460957345283879	0.80527072027618	Female vs Male Oenocytes	Female Oenocytes	10.715	Male Oenocytes	17.5818		FALSE	FALSE	FALSE
Anogam_AGAP000349	0.113037978082632	0.262736473276987	0.430233292975135	0.667025946048308	0.904056476689875	Female vs Male Oenocytes	Female Oenocytes	655.858	Male Oenocytes	622.026	transient receptor potential cation channel subfamily C2C invertebrate	FALSE	FALSE	FALSE
Anogam_AGAP000351	-0.455169116366852	0.449485980526114	-1.0126436331431	0.311230410483607	0.692560825952588	Female vs Male Oenocytes	Female Oenocytes	268.25	Male Oenocytes	374.276	GPRNPY1	FALSE	FALSE	FALSE
Anogam_AGAP000352	2.15899328191081	3.99526224051329	0.540388378018818	0.588929221057861	NA	Female vs Male Oenocytes	Female Oenocytes	1.11068	Male Oenocytes	0	TWDL1 cuticular protein TWDL family (TWDL1)	FALSE	FALSE	FALSE
Anogam_AGAP000354	-0.296425964069295	0.33235902278479	-0.891884810544884	0.372454676976721	0.743739951513954	Female vs Male Oenocytes	Female Oenocytes	498.046	Male Oenocytes	628.6		FALSE	FALSE	FALSE
Anogam_AGAP000355	0.0263535425937841	0.470672428974454	0.055991260527424	0.955348769329505	0.99137241641324	Female vs Male Oenocytes	Female Oenocytes	77.2436	Male Oenocytes	77.2369		FALSE	FALSE	FALSE
Anogam_AGAP000356	3.1909591623668	1.49135252857725	2.13964109841351	0.0323837825554893	0.204936176172052	Female vs Male Oenocytes	Female Oenocytes	27.2528	Male Oenocytes	3.14035		FALSE	FALSE	FALSE
Anogam_AGAP000357	NA	NA	NA	NA	NA	Female vs Male Oenocytes	Female Oenocytes	0	Male Oenocytes	0	E3 ubiquitin-protein ligase ZNRF1-2	FALSE	FALSE	FALSE
Anogam_AGAP000358	0.563239333913536	0.42022152429913	1.34033908627822	0.18013512959513	0.540908555793566	Female vs Male Oenocytes	Female Oenocytes	1407.2	Male Oenocytes	989.241		FALSE	FALSE	FALSE
Anogam_AGAP000359	1.72183411137019	1.11767493344736	1.54054999342193	0.123426346502346	0.440851703056467	Female vs Male Oenocytes	Female Oenocytes	38.7064	Male Oenocytes	11.8533	venom allergen	FALSE	FALSE	FALSE
Anogam_AGAP000360	2.53782221689528	2.05256563706609	1.23641464665793	0.216304474550604	0.591519245377049	Female vs Male Oenocytes	Female Oenocytes	13.8788	Male Oenocytes	2.45791		FALSE	FALSE	FALSE
Anogam_AGAP000361	-0.871647037556398	0.769484273605455	-1.13276783873991	0.257311760675336	0.637236426534977	Female vs Male Oenocytes	Female Oenocytes	44.2849	Male Oenocytes	82.9112		FALSE	FALSE	FALSE
Anogam_AGAP000363	0.567832816288857	0.943838907098029	0.601620479955358	0.547426793242853	0.847711448568474	Female vs Male Oenocytes	Female Oenocytes	80.457	Male Oenocytes	54.4578		FALSE	FALSE	FALSE
Anogam_AGAP000364	0.531481770344538	2.14790164273358	0.247442322204351	0.804565923892886	0.953448566616281	Female vs Male Oenocytes	Female Oenocytes	10.2246	Male Oenocytes	7.07933	protein stoned-A	FALSE	FALSE	FALSE
Anogam_AGAP000365	0.886565606762076	1.04865284879356	0.845432888283327	0.397869188435135	0.762074240657468	Female vs Male Oenocytes	Female Oenocytes	249.169	Male Oenocytes	134.719	alpha-12C3-fucosyltransferase	FALSE	FALSE	FALSE
Anogam_AGAP000366	-2.02953430318776	3.9023135284198	-0.520084890259856	0.60300440915996	NA	Female vs Male Oenocytes	Female Oenocytes	0.809848	Male Oenocytes	3.20952		FALSE	FALSE	FALSE
Anogam_AGAP000367	0.555342786838464	0.335169907397393	1.6568993056409	0.097539834791278	0.387872355934367	Female vs Male Oenocytes	Female Oenocytes	978.449	Male Oenocytes	682.222	glyoxalase domain-containing protein 4	FALSE	FALSE	FALSE
Anogam_AGAP000368	0.845005037066052	0.655491477316247	1.2891167411142	0.197357504291839	0.56521198828025	Female vs Male Oenocytes	Female Oenocytes	85.9271	Male Oenocytes	49.1453	PI-3-kinase-related kinase SMG-1	FALSE	FALSE	FALSE
Anogam_AGAP000369	-2.30809739049571	2.54987645915357	-0.905180085180239	0.36536999043173	0.737117037813666	Female vs Male Oenocytes	Female Oenocytes	4.06675	Male Oenocytes	20.1398	GPRNNA10 putative GPCR class a orphan receptor 10	FALSE	FALSE	FALSE
Anogam_AGAP000372	1.27153707363833	0.613731033665249	2.07181485681865	0.0382827106261968	0.225589467812369	Female vs Male Oenocytes	Female Oenocytes	46.7999	Male Oenocytes	19.7143		FALSE	FALSE	FALSE
Anogam_AGAP000374	0.414205432768885	0.904394301010675	0.457992086312357	0.646958126786349	0.896992814788647	Female vs Male Oenocytes	Female Oenocytes	32.8285	Male Oenocytes	25.249	anaphase-promoting complex subunit 1	FALSE	FALSE	FALSE
Anogam_AGAP000375	-0.0640596411096214	0.289132705756827	-0.221557920754556	0.824658042703197	0.957521707273817	Female vs Male Oenocytes	Female Oenocytes	875.253	Male Oenocytes	946.342		FALSE	FALSE	FALSE
Anogam_AGAP000376	2.21686207391069	1.06990434855502	2.07201893973486	0.0382636749445446	0.225589467812369	Female vs Male Oenocytes	Female Oenocytes	19439.8	Male Oenocytes	4124.6	Tsf1 Transferrin	FALSE	FALSE	FALSE
Anogam_AGAP000377	-0.246891981882519	1.39835226656932	-0.176559217433986	0.8598546304973	0.965980865262181	Female vs Male Oenocytes	Female Oenocytes	39.3459	Male Oenocytes	46.3965	E3 ubiquitin-protein ligase	FALSE	FALSE	FALSE
Anogam_AGAP000378	1.04420828535905	0.278617534549479	3.7478197021861	0.000178378399033219	0.00497309202345764	Female vs Male Oenocytes	Female Oenocytes	857.152	Male Oenocytes	427.293	programmed cell death protein 4	FALSE	FALSE	FALSE
Anogam_AGAP000379	-0.00677043802642575	0.927830657810066	-0.00729706220573249	0.99417783839576	0.998358167750758	Female vs Male Oenocytes	Female Oenocytes	21.6322	Male Oenocytes	22.518	PBD3 piggyBac-derived 3	FALSE	FALSE	FALSE
Anogam_AGAP000380	-0.126671181076405	0.304925239537561	-0.415417173299627	0.677836537056158	0.908949513138207	Female vs Male Oenocytes	Female Oenocytes	656.653	Male Oenocytes	734.102	5-nucleotidase	FALSE	FALSE	FALSE
Anogam_AGAP000382	1.8382956418819	1.35772866422852	1.35394920230725	0.17575258459841	0.534047734287312	Female vs Male Oenocytes	Female Oenocytes	15.4896	Male Oenocytes	4.50036	CPF4 cuticular protein 4 from fifty-one aa family	FALSE	FALSE	FALSE
Anogam_AGAP000383	-0.371274867608369	2.19517243008379	-0.16913243921991	0.865692469670309	NA	Female vs Male Oenocytes	Female Oenocytes	3.27258	Male Oenocytes	4.27631	putative G-protein coupled receptor GPCR	FALSE	FALSE	FALSE
Anogam_AGAP000384	0.801463064029358	0.664497559472444	1.20611889781153	0.227771649225718	0.603123680073095	Female vs Male Oenocytes	Female Oenocytes	41.3694	Male Oenocytes	23.9809	E3 ubiquitin-protein ligase UBR3	FALSE	FALSE	FALSE
Anogam_AGAP000385	1.20009138334496	0.46776921379541	2.56556299121866	0.0103008515947066	0.0997063005793671	Female vs Male Oenocytes	Female Oenocytes	3056.2	Male Oenocytes	1345.58		FALSE	FALSE	FALSE
Anogam_AGAP000386	0.953406220851228	0.686872833493882	1.38803891253288	0.165125196320207	0.516147856143342	Female vs Male Oenocytes	Female Oenocytes	40.2059	Male Oenocytes	21.3302	E3 ubiquitin-protein ligase UBR3	FALSE	FALSE	FALSE
Anogam_AGAP000387	1.32820272764759	0.884070181602586	1.50237249857235	0.133000934728188	0.457544797766749	Female vs Male Oenocytes	Female Oenocytes	52.9575	Male Oenocytes	21.3219	UDP-N-acetylglucosamine transporter	FALSE	FALSE	FALSE
Anogam_AGAP000388	-5.13299157698134	3.92351255504622	-1.30826434348466	0.190783664673922	NA	Female vs Male Oenocytes	Female Oenocytes	0	Male Oenocytes	7.36227	TRAF6 TOLL pathway signalling TNF Receptor-Associated Factor (TRAF).	FALSE	FALSE	FALSE
Anogam_AGAP000389	-0.34514962642155	1.19876073673073	-0.287922031349512	0.773406422113557	0.942130780406529	Female vs Male Oenocytes	Female Oenocytes	12.0631	Male Oenocytes	15.3688		FALSE	FALSE	FALSE
Anogam_AGAP000390	-4.45463155457067	2.03844923804712	-2.18530413778579	0.0288665542150449	0.192368078383954	Female vs Male Oenocytes	Female Oenocytes	2.11593	Male Oenocytes	47.775	Phospholipid-transporting ATPase	FALSE	FALSE	FALSE
Anogam_AGAP000391	0.330836351197505	0.378228217933524	0.874700340987388	0.381736974544486	0.748613500282268	Female vs Male Oenocytes	Female Oenocytes	275.257	Male Oenocytes	223.318	negative elongation factor C-D	FALSE	FALSE	FALSE
Anogam_AGAP000392	-0.478666645748557	0.221170869561989	-2.16423910932085	0.0304460031978499	0.197438002021006	Female vs Male Oenocytes	Female Oenocytes	471.781	Male Oenocytes	676.7	synaptobrevin homolog YKT6	FALSE	FALSE	FALSE
Anogam_AGAP000393	-0.251001407616074	0.285617239808383	-0.878803421615822	0.379507870750079	0.747845099293727	Female vs Male Oenocytes	Female Oenocytes	152.185	Male Oenocytes	185.794	Trimeric intracellular cation channel type B	FALSE	FALSE	FALSE
Anogam_AGAP000394	0.732576268030324	0.39207324806084	1.8684678734231	0.0616968840993208	0.298823175913702	Female vs Male Oenocytes	Female Oenocytes	227.312	Male Oenocytes	140.483	facilitated glucose transporter (solute carrier family 2)	FALSE	FALSE	FALSE
Anogam_AGAP000395	0.652048982656152	0.381097036678719	1.71097888437757	0.0870850108885855	0.3667994683138	Female vs Male Oenocytes	Female Oenocytes	217.869	Male Oenocytes	142.489	endoplasmic reticulum protein	FALSE	FALSE	FALSE
Anogam_AGAP000396	0.48801795168958	0.410131042604038	1.18990737348486	0.234082800070601	0.610619475395651	Female vs Male Oenocytes	Female Oenocytes	861.435	Male Oenocytes	636.851	TPX1 thioredoxin peroxidase 1	FALSE	FALSE	FALSE
Anogam_AGAP000397	0.665417452247997	0.336739802898436	1.97605821028735	0.0481481847515014	0.257600382771439	Female vs Male Oenocytes	Female Oenocytes	203.517	Male Oenocytes	131.663	nucleolar protein 14	FALSE	FALSE	FALSE
Anogam_AGAP000398	-0.409057021552688	0.405743834868575	-1.00816571047884	0.313374916246576	0.694750141116593	Female vs Male Oenocytes	Female Oenocytes	94.5872	Male Oenocytes	129.856	methionyl-tRNA formyltransferase	FALSE	FALSE	FALSE
Anogam_AGAP000399	0.540348664747675	0.292959290007039	1.84444966648674	0.0651176348033721	0.308059996168812	Female vs Male Oenocytes	Female Oenocytes	435.724	Male Oenocytes	306.826	squid	FALSE	FALSE	FALSE
Anogam_AGAP000400	0.0504904312196695	0.428126569968415	0.11793342147252	0.906120411518852	0.979640302378329	Female vs Male Oenocytes	Female Oenocytes	99.466	Male Oenocytes	98.4519		FALSE	FALSE	FALSE
Anogam_AGAP000401	2.17545761527626	1.28293287895501	1.69569090555091	0.0899444317346336	0.373949447781773	Female vs Male Oenocytes	Female Oenocytes	17.8627	Male Oenocytes	3.9054	carbonic anhydrase 2	FALSE	FALSE	FALSE
Anogam_AGAP000402	0.698331878626335	0.350038108504722	1.99501671863512	0.0460410564632878	0.251316416142574	Female vs Male Oenocytes	Female Oenocytes	260.722	Male Oenocytes	165.899	Nogo-B receptor precursor	FALSE	FALSE	FALSE
Anogam_AGAP000403	0.356618110069461	0.53633217383877	0.664920225682128	0.506101518513084	0.832649892433898	Female vs Male Oenocytes	Female Oenocytes	134.434	Male Oenocytes	106.653		FALSE	FALSE	FALSE
Anogam_AGAP000405	1.40945594929259	0.636484502449231	2.21443875517615	0.0267986113937564	0.183391169833803	Female vs Male Oenocytes	Female Oenocytes	165.661	Male Oenocytes	63.3069	sphingomyelin phosphodiesterase 4	FALSE	FALSE	FALSE
Anogam_AGAP000406	-0.231636504043238	0.464712434558636	-0.498451271834884	0.618166006324544	0.883615294333271	Female vs Male Oenocytes	Female Oenocytes	265.724	Male Oenocytes	316.356	Rho-associated protein kinase	FALSE	FALSE	FALSE
Anogam_AGAP000407	-0.335409313924845	0.363111665771213	-0.923708449885435	0.355638131491841	0.728635460082921	Female vs Male Oenocytes	Female Oenocytes	772.315	Male Oenocytes	1007.34		FALSE	FALSE	FALSE
Anogam_AGAP000408	1.15935204560815	2.08958253588733	0.554824720104122	0.5790145569464	NA	Female vs Male Oenocytes	Female Oenocytes	9.68624	Male Oenocytes	4.29597		FALSE	FALSE	FALSE
Anogam_AGAP000410	0.502576785655963	0.400226034852143	1.25573236594074	0.209213020376552	0.581168049381315	Female vs Male Oenocytes	Female Oenocytes	126.783	Male Oenocytes	92.1848	histone deacetylase 4-5	FALSE	FALSE	FALSE
Anogam_AGAP000411	-0.933833547571927	2.07646155767564	-0.449723494335838	0.652909828472124	NA	Female vs Male Oenocytes	Female Oenocytes	3.35994	Male Oenocytes	6.30668		FALSE	FALSE	FALSE
Anogam_AGAP000412	-0.0381173644988687	0.491926203373485	-0.0774859404469024	0.938236975543417	0.987215628566101	Female vs Male Oenocytes	Female Oenocytes	254.488	Male Oenocytes	264.631		FALSE	FALSE	FALSE
Anogam_AGAP000413	1.83604118724869	0.827120535817714	2.21979881739186	0.0264324272470811	0.181496594839299	Female vs Male Oenocytes	Female Oenocytes	32.6537	Male Oenocytes	9.1754		FALSE	FALSE	FALSE
Anogam_AGAP000414	0.789692301054822	0.354568308714523	2.22719369341786	0.0259343314385477	0.179896221348781	Female vs Male Oenocytes	Female Oenocytes	266.511	Male Oenocytes	158.077	prostaglandin reductase 1	FALSE	FALSE	FALSE
Anogam_AGAP000415	0.368995248465141	0.28337631570167	1.30213863339803	0.192868998533374	0.557566741214663	Female vs Male Oenocytes	Female Oenocytes	802.176	Male Oenocytes	636.07	5-hydroxyisourate hydrolase	FALSE	FALSE	FALSE
Anogam_AGAP000416	1.08811216616883	0.454676559331653	2.39315650617285	0.0167041140735526	0.135551088367202	Female vs Male Oenocytes	Female Oenocytes	756.322	Male Oenocytes	366.435	hydroxyacylglutathione hydrolase	FALSE	FALSE	FALSE
Anogam_AGAP000417	-2.80549840179614	3.99000604179727	-0.703131366821797	0.481973886112819	NA	Female vs Male Oenocytes	Female Oenocytes	0	Male Oenocytes	1.62635		FALSE	FALSE	FALSE
Anogam_AGAP000418	-1.23396113827818	4.0804728567969	-0.302406407684529	0.762342270655386	NA	Female vs Male Oenocytes	Female Oenocytes	0	Male Oenocytes	0.500789	novel protein kinase C	FALSE	FALSE	FALSE
Anogam_AGAP000419	2.57375454607639	3.97333410837259	0.647756890278364	0.517142202070158	NA	Female vs Male Oenocytes	Female Oenocytes	1.40396	Male Oenocytes	0		FALSE	FALSE	FALSE
Anogam_AGAP000420	-6.44756996883481	2.89264120866835	-2.22895599686315	0.0258168327219856	0.179570806410749	Female vs Male Oenocytes	Female Oenocytes	0	Male Oenocytes	17.6387		FALSE	FALSE	FALSE
Anogam_AGAP000421	-4.92555304977724	3.92609493868315	-1.25456799356699	0.209635628437157	NA	Female vs Male Oenocytes	Female Oenocytes	0	Male Oenocytes	6.24957		FALSE	FALSE	FALSE
Anogam_AGAP000422	-0.272464191370914	4.0804728567969	-0.0667727003543391	0.9467626568526	NA	Female vs Male Oenocytes	Female Oenocytes	0.390494	Male Oenocytes	0.528821	(heparan sulfate)-glucosamine 3-sulfotransferase 3	FALSE	FALSE	FALSE
Anogam_AGAP000424	-2.92834018466807	3.94631872817427	-0.742043505954432	0.458060976630438	NA	Female vs Male Oenocytes	Female Oenocytes	0.359536	Male Oenocytes	2.89436		FALSE	FALSE	FALSE
Anogam_AGAP000425	0.517803582347947	0.310250822449127	1.66898375404904	0.0951205995029483	0.383197135570716	Female vs Male Oenocytes	Female Oenocytes	680.885	Male Oenocytes	491.842		FALSE	FALSE	FALSE
Anogam_AGAP000426	0.158542138457625	0.295100207235209	0.537248482279984	0.591095986120374	0.870242455408298	Female vs Male Oenocytes	Female Oenocytes	550.735	Male Oenocytes	506.811	benzodiazapine receptor	FALSE	FALSE	FALSE
Anogam_AGAP000427	7.2733591489102	1.29576404812011	5.6131817821789	1.98639728118181e-08	2.59148445298796e-06	Female vs Male Oenocytes	Female Oenocytes	427.551	Male Oenocytes	2.80707	vitellogenin receptor	TRUE	FALSE	TRUE
Anogam_AGAP000428	-0.405895867238883	0.40127342200053	-1.01151944032403	0.31176788142343	0.693557758945651	Female vs Male Oenocytes	Female Oenocytes	346.049	Male Oenocytes	471.68		FALSE	FALSE	FALSE
Anogam_AGAP000429	1.14904795419113	0.59363883637311	1.93560104862974	0.0529165818499255	0.274594154464478	Female vs Male Oenocytes	Female Oenocytes	254.219	Male Oenocytes	115.573	Protein FAN	FALSE	FALSE	FALSE
Anogam_AGAP000430	1.25277773132604	1.08634567016819	1.15320359414889	0.248826828648094	0.628629373270286	Female vs Male Oenocytes	Female Oenocytes	41.5905	Male Oenocytes	17.6049		FALSE	FALSE	FALSE
Anogam_AGAP000431	3.57213132811174	3.94022484758593	0.906580580115951	0.364628635113022	NA	Female vs Male Oenocytes	Female Oenocytes	2.95775	Male Oenocytes	0		FALSE	FALSE	FALSE
Anogam_AGAP000432	-0.279491560450312	0.349456892736582	-0.799788375217399	0.423833419369293	0.781928885806017	Female vs Male Oenocytes	Female Oenocytes	387.467	Male Oenocytes	482.522		FALSE	FALSE	FALSE
Anogam_AGAP000433	0.230146446958203	0.387692110928263	0.593632009707798	0.552758266758073	0.849806333665228	Female vs Male Oenocytes	Female Oenocytes	162.516	Male Oenocytes	142.834	Ras-related protein Rab-39B	FALSE	FALSE	FALSE
Anogam_AGAP000434	0.536517815846413	0.39968515637245	1.34235111635333	0.17948217674561	0.539560009029048	Female vs Male Oenocytes	Female Oenocytes	978.032	Male Oenocytes	685.852	dolichyl-diphosphooligosaccharide--protein glycosyltransferase	FALSE	FALSE	FALSE
Anogam_AGAP000436	1.017293641768	0.406977586131525	2.49963063430043	0.0124322853375563	0.112051566130768	Female vs Male Oenocytes	Female Oenocytes	274.612	Male Oenocytes	138.028	Cht11 chitinase	FALSE	FALSE	FALSE
Anogam_AGAP000437	0.689592213364308	4.0804728567969	0.168998113102418	0.865798125578915	NA	Female vs Male Oenocytes	Female Oenocytes	0.389273	Male Oenocytes	0		FALSE	FALSE	FALSE
Anogam_AGAP000438	1.23607086032819	0.289132698612919	4.27509882575752	1.91052529674805e-05	0.000820316684375873	Female vs Male Oenocytes	Female Oenocytes	302.719	Male Oenocytes	132.136		TRUE	FALSE	TRUE
Anogam_AGAP000439	0.788721494312361	0.407896016674594	1.93363372543443	0.0531581776268276	0.275116944384065	Female vs Male Oenocytes	Female Oenocytes	371.913	Male Oenocytes	223.033	4a-hydroxytetrahydrobiopterin dehydratase	FALSE	FALSE	FALSE
Anogam_AGAP000440	-0.431856272821643	0.544856383206276	-0.792605695982363	0.428007589079262	0.784680829969477	Female vs Male Oenocytes	Female Oenocytes	3022.55	Male Oenocytes	4260.27	ABCD2 ATP-binding cassette transporter (ABC transporter) family D member 2	FALSE	FALSE	FALSE
Anogam_AGAP000441	0.374696106042192	0.60716660277695	0.617122391660664	0.537154000374032	0.844302769305116	Female vs Male Oenocytes	Female Oenocytes	38.321	Male Oenocytes	29.9947	nuclear transcription factor Y2C gamma	FALSE	FALSE	FALSE
Anogam_AGAP000444	0.468219022422082	0.37434699421346	1.25076207278185	0.21102129611828	0.58272800795105	Female vs Male Oenocytes	Female Oenocytes	481.024	Male Oenocytes	360.051	Ciao1 cytosolic iron-sulfur protein assembly protein	FALSE	FALSE	FALSE
Anogam_AGAP000445	-2.9447020566291	3.94583276382158	-0.746281515939649	0.45549737486827	NA	Female vs Male Oenocytes	Female Oenocytes	0.385812	Male Oenocytes	3.13489	GPRADS putative adenosine receptor	FALSE	FALSE	FALSE
Anogam_AGAP000446	-0.516795538656865	1.74579553026815	-0.296022947531252	0.767212556761097	NA	Female vs Male Oenocytes	Female Oenocytes	3.94798	Male Oenocytes	5.86552		FALSE	FALSE	FALSE
Anogam_AGAP000447	1.34538816426068	0.482111775240668	2.79061461128815	0.00526080709290456	0.0635795403532029	Female vs Male Oenocytes	Female Oenocytes	199.055	Male Oenocytes	80.0439		FALSE	FALSE	FALSE
Anogam_AGAP000448	1.37762086520427	0.67704369766923	2.03475915948531	0.0418751123015111	0.236827750765118	Female vs Male Oenocytes	Female Oenocytes	210.358	Male Oenocytes	81.4858	solute carrier family 25 (mitochondrial ornithine transporter) member 2-15	FALSE	FALSE	FALSE
Anogam_AGAP000449	0.808968696362086	1.08684322712195	0.744328782822067	0.456677592297892	0.803372318885315	Female vs Male Oenocytes	Female Oenocytes	40.9557	Male Oenocytes	23.6333		FALSE	FALSE	FALSE
Anogam_AGAP000452	0.774586840765547	0.422957354289319	1.83135919711588	0.0670469472835849	0.3136872347392	Female vs Male Oenocytes	Female Oenocytes	483.148	Male Oenocytes	287.531		FALSE	FALSE	FALSE
Anogam_AGAP000453	0.00973391366612529	0.387663060393193	0.0251092112213439	0.979967853007593	0.995920590452938	Female vs Male Oenocytes	Female Oenocytes	155.591	Male Oenocytes	158.51		FALSE	FALSE	FALSE
Anogam_AGAP000454	0.305508867009832	0.302789769308273	1.00898015051093	0.312984153820385	0.694366996875365	Female vs Male Oenocytes	Female Oenocytes	313.437	Male Oenocytes	260.852		FALSE	FALSE	FALSE
Anogam_AGAP000456	0.565954367366142	0.353162881813309	1.60253072027349	0.109038299889816	0.411247703653734	Female vs Male Oenocytes	Female Oenocytes	198.34	Male Oenocytes	137.313		FALSE	FALSE	FALSE
Anogam_AGAP000457	-0.156278925008764	0.364217269535811	-0.429081589700397	0.667863849664934	0.904495868562494	Female vs Male Oenocytes	Female Oenocytes	1354.44	Male Oenocytes	1564.05	protein-L-isoaspartate(D-aspartate) O-methyltransferase	FALSE	FALSE	FALSE
Anogam_AGAP000458	0.689592213364308	4.0804728567969	0.168998113102418	0.865798125578915	NA	Female vs Male Oenocytes	Female Oenocytes	0.385854	Male Oenocytes	0		FALSE	FALSE	FALSE
Anogam_AGAP000460	4.07489404092782	2.11925346170393	1.92279692569265	0.0545055583486197	NA	Female vs Male Oenocytes	Female Oenocytes	8.07466	Male Oenocytes	0.510103		FALSE	FALSE	FALSE
Anogam_AGAP000461	1.00162325803015	0.549829113887169	1.82169920204644	0.0685006391133957	0.318666774868386	Female vs Male Oenocytes	Female Oenocytes	135.692	Male Oenocytes	68.6982	Odz2C odd Oz-ten-m homolog 2 (Drosophila)	FALSE	FALSE	FALSE
Anogam_AGAP000462	-0.0443253119385746	0.210413987843905	-0.210657629717361	0.833154439201	0.959830133964607	Female vs Male Oenocytes	Female Oenocytes	4698.55	Male Oenocytes	4989.15	peptidyl-prolyl isomerase F (cyclophilin D)	FALSE	FALSE	FALSE
Anogam_AGAP000463	0.774014374887848	0.399337246219159	1.93824738918309	0.0525930476661996	0.273587792804295	Female vs Male Oenocytes	Female Oenocytes	228.753	Male Oenocytes	136.273		FALSE	FALSE	FALSE
Anogam_AGAP000466	-0.435334060065745	0.675877166723623	-0.644102333233222	0.519509077463245	0.839009040172786	Female vs Male Oenocytes	Female Oenocytes	124.46	Male Oenocytes	171.121	ACE2 acetylcholinesterase	FALSE	FALSE	FALSE
Anogam_AGAP000467	-0.257931298576668	0.314487006239365	-0.820165200658081	0.412121937162548	0.772187964015115	Female vs Male Oenocytes	Female Oenocytes	636.612	Male Oenocytes	781.435	lysophospholipid hydrolase	FALSE	FALSE	FALSE
Anogam_AGAP000468	-0.711328033111287	0.833949251860654	-0.852963212718541	0.393679704960651	0.758950532724734	Female vs Male Oenocytes	Female Oenocytes	44.7159	Male Oenocytes	74.6848		FALSE	FALSE	FALSE
Anogam_AGAP000469	-0.0847201906783976	0.433971817584602	-0.195220489546839	0.845220339310405	0.964460550763485	Female vs Male Oenocytes	Female Oenocytes	117.173	Male Oenocytes	127.474		FALSE	FALSE	FALSE
Anogam_AGAP000470	-0.146557637945425	0.265815678079434	-0.551350616353143	0.581393346687708	0.863561333512497	Female vs Male Oenocytes	Female Oenocytes	625.157	Male Oenocytes	709.056	methylthioribulose-1-phosphate dehydratase	FALSE	FALSE	FALSE
Anogam_AGAP000471	0.641542760803211	0.403958568626191	1.58813999907221	0.112254685225719	0.417661307808746	Female vs Male Oenocytes	Female Oenocytes	356.627	Male Oenocytes	235.508	F-box and leucine-rich repeat protein 4	FALSE	FALSE	FALSE
Anogam_AGAP000472	-1.02381374822292	0.478668090961448	-2.1388802962957	0.0324453642009521	0.205022697753461	Female vs Male Oenocytes	Female Oenocytes	47.2139	Male Oenocytes	99.6103	chordin	FALSE	FALSE	FALSE
Anogam_AGAP000473	0.8129281417759	0.831593854535462	0.977554292088909	0.328294813215527	0.705317948882339	Female vs Male Oenocytes	Female Oenocytes	121.804	Male Oenocytes	69.8733	proton-coupled amino acid transporter	FALSE	FALSE	FALSE
Anogam_AGAP000474	3.52439296548373	1.48665586580513	2.37068513739392	0.0177551492639687	0.141062963700497	Female vs Male Oenocytes	Female Oenocytes	33.5632	Male Oenocytes	3.06559	origin recognition complex subunit 2	FALSE	FALSE	FALSE
Anogam_AGAP000475	0.092834281260096	0.361253883620458	0.256977946727432	0.797195797478679	0.951480448603399	Female vs Male Oenocytes	Female Oenocytes	286.293	Male Oenocytes	276.481		FALSE	FALSE	FALSE
Anogam_AGAP000476	1.60918766583577	3.97339564686052	0.404990544323779	0.685484461443139	NA	Female vs Male Oenocytes	Female Oenocytes	1.38777	Male Oenocytes	0.485073	Xaa-Pro aminopeptidase	FALSE	FALSE	FALSE
Anogam_AGAP000477	1.7300596279056	1.92787561352424	0.8973917278527	0.369509925064882	NA	Female vs Male Oenocytes	Female Oenocytes	4.60585	Male Oenocytes	1.49401	serine-threonine kinase 32	FALSE	FALSE	FALSE
Anogam_AGAP000478	0.0692672072500295	0.323263501789747	0.214274753773723	0.83033280439331	0.959446334582248	Female vs Male Oenocytes	Female Oenocytes	110.574	Male Oenocytes	108.399	BTB-POZ domain-containing protein KCTD9	FALSE	FALSE	FALSE
Anogam_AGAP000479	1.55119755782486	0.599364964088243	2.58806845706196	0.00965157973812306	0.0958190004050149	Female vs Male Oenocytes	Female Oenocytes	329.141	Male Oenocytes	114.664	pre-rRNA-processing protein IPI3	FALSE	FALSE	FALSE
Anogam_AGAP000480	0.37945107478147	0.374274003438542	1.01383230279251	0.310662778621708	0.692205919696629	Female vs Male Oenocytes	Female Oenocytes	245.125	Male Oenocytes	194.714	nuclear pore complex protein Nup43	FALSE	FALSE	FALSE
Anogam_AGAP000481	-0.894576673779984	0.657391911359347	-1.36079659381599	0.173577978641035	0.530270042224908	Female vs Male Oenocytes	Female Oenocytes	59.3487	Male Oenocytes	114.83	cyanogenic beta-glucosidase	FALSE	FALSE	FALSE
Anogam_AGAP000482	-0.698074707722837	0.505591246214636	-1.38070964034549	0.167368255969512	0.518775319142783	Female vs Male Oenocytes	Female Oenocytes	655.191	Male Oenocytes	1107.08		FALSE	FALSE	FALSE
Anogam_AGAP000483	0.239210888745398	0.48089213815298	0.497431481546286	0.618884809874184	0.884145981367359	Female vs Male Oenocytes	Female Oenocytes	1421.23	Male Oenocytes	1224	Inositol polyphosphate-5-phosphatase F	FALSE	FALSE	FALSE
Anogam_AGAP000484	2.15554421184288	3.99547172490486	0.539496800442057	0.589544104100909	NA	Female vs Male Oenocytes	Female Oenocytes	1.10545	Male Oenocytes	0	homeobox protein Nkx-1	FALSE	FALSE	FALSE
Anogam_AGAP000485	3.06340176189561	2.91395378302842	1.05128701070608	0.293126790997336	NA	Female vs Male Oenocytes	Female Oenocytes	4.27016	Male Oenocytes	0.533997	venom allergen	FALSE	FALSE	FALSE
Anogam_AGAP000488	-0.190485886107065	2.02193156450048	-0.0942098582620055	0.924942453845631	NA	Female vs Male Oenocytes	Female Oenocytes	1.79839	Male Oenocytes	2.09559	homeobox protein Nkx-5	FALSE	FALSE	FALSE
Anogam_AGAP000489	0.133930426978669	0.431236171334939	0.310573267924332	0.756125051967607	0.936882568620485	Female vs Male Oenocytes	Female Oenocytes	242.934	Male Oenocytes	226.71	Eph receptor B1	FALSE	FALSE	FALSE
Anogam_AGAP000491	0.280702366231347	0.272704373922999	1.02932843427955	0.303325366045732	0.684147414462275	Female vs Male Oenocytes	Female Oenocytes	438.167	Male Oenocytes	371.878	HIG1 domain family member 2A	FALSE	FALSE	FALSE
Anogam_AGAP000492	0.820042000147141	0.601751264797213	1.36275908023806	0.172958451273625	0.529649473415711	Female vs Male Oenocytes	Female Oenocytes	32.9064	Male Oenocytes	19.3054	cell division cycle 14	FALSE	FALSE	FALSE
Anogam_AGAP000493	1.5745432188397	4.03873968642138	0.389860040777935	0.696640043350389	NA	Female vs Male Oenocytes	Female Oenocytes	0.714754	Male Oenocytes	0		FALSE	FALSE	FALSE
Anogam_AGAP000494	-0.222069763527008	0.289640246518128	-0.766708930117931	0.443254592969819	0.795043574912226	Female vs Male Oenocytes	Female Oenocytes	3401.92	Male Oenocytes	4078.84		FALSE	FALSE	FALSE
Anogam_AGAP000495	2.46052806959776	1.7265203890014	1.42513698956136	0.154117606087452	NA	Female vs Male Oenocytes	Female Oenocytes	6.90805	Male Oenocytes	1.26507	SUMO-conjugating enzyme UBC9	FALSE	FALSE	FALSE
Anogam_AGAP000496	0.695824180951276	0.309896064032186	2.24534694599738	0.024745868456767	0.17499232620991	Female vs Male Oenocytes	Female Oenocytes	319.52	Male Oenocytes	203.727	geminin	FALSE	FALSE	FALSE
Anogam_AGAP000497	1.16331904135077	0.560370276958021	2.07598277279421	0.0378955443273595	0.224854261851435	Female vs Male Oenocytes	Female Oenocytes	54.2146	Male Oenocytes	24.5094		FALSE	FALSE	FALSE
Anogam_AGAP000498	0.401813787981938	0.212321579623431	1.8924773859284	0.0584274039002162	0.291097877162197	Female vs Male Oenocytes	Female Oenocytes	1278.6	Male Oenocytes	993.849	nuclear transport factor 2	FALSE	FALSE	FALSE
Anogam_AGAP000499	0.56653973473865	0.42842948871234	1.32236400543157	0.186046968762917	0.549826262973385	Female vs Male Oenocytes	Female Oenocytes	359.363	Male Oenocytes	246.64		FALSE	FALSE	FALSE
Anogam_AGAP000500	-0.0886052206633395	0.585746877026264	-0.151268788854962	0.879763688821287	0.970569157902222	Female vs Male Oenocytes	Female Oenocytes	7159.6	Male Oenocytes	7958.45	Cpr NADPH cytochrome P450 reductase	FALSE	FALSE	FALSE
Anogam_AGAP000502	-0.394170344878064	0.941346434734557	-0.418730374210439	0.675413194599146	0.907806718827224	Female vs Male Oenocytes	Female Oenocytes	9.05865	Male Oenocytes	12.0419	Echinoderm microtubule-associated protein-like 2	FALSE	FALSE	FALSE
Anogam_AGAP000504	-0.0446956580401999	0.456216407428795	-0.0979702994289522	0.921955877506944	0.984141719239553	Female vs Male Oenocytes	Female Oenocytes	65.1824	Male Oenocytes	68.6084		FALSE	FALSE	FALSE
Anogam_AGAP000506	NA	NA	NA	NA	NA	Female vs Male Oenocytes	Female Oenocytes	0	Male Oenocytes	0	ABCG2 ATP-binding cassette transporter (ABC transporter) family G member 2	FALSE	FALSE	FALSE
Anogam_AGAP000507	1.81294405080204	0.76902863543607	2.35744674159504	0.0184010946325366	0.144929983731186	Female vs Male Oenocytes	Female Oenocytes	73.6541	Male Oenocytes	21.179		FALSE	FALSE	FALSE
Anogam_AGAP000508	2.34300272110614	0.839318031901678	2.79155532474085	0.00524553892964131	0.0634703973222711	Female vs Male Oenocytes	Female Oenocytes	74.764	Male Oenocytes	14.7502	mRpL22 39S ribosomal protein L222C mitochondrial	FALSE	FALSE	FALSE
Anogam_AGAP000509	1.62709687174219	2.70915233532714	0.600592609918968	0.548111361319493	NA	Female vs Male Oenocytes	Female Oenocytes	6.34153	Male Oenocytes	2.10347	Post-GPI attachment to proteins factor 2-like	FALSE	FALSE	FALSE
Anogam_AGAP000512	-0.469767840905518	0.264827641667187	-1.77386256943632	0.0760858854416742	0.338692025483148	Female vs Male Oenocytes	Female Oenocytes	312.945	Male Oenocytes	444.294	transcriptional enhancer factor	FALSE	FALSE	FALSE
Anogam_AGAP000513	0.780656343659076	0.631394254839453	1.2364007712702	0.216309629582162	0.591519245377049	Female vs Male Oenocytes	Female Oenocytes	677.954	Male Oenocytes	396.516	dipeptidase E	FALSE	FALSE	FALSE
Anogam_AGAP000514	1.67117564762996	0.280699301651486	5.95361526657758	2.6228297472277e-09	4.37539598488345e-07	Female vs Male Oenocytes	Female Oenocytes	364.345	Male Oenocytes	117.701	Protein MAK16 homolog	TRUE	FALSE	TRUE
Anogam_AGAP000515	-0.564674767382524	0.241777451330632	-2.33551459937563	0.0195165541325272	0.150111619090535	Female vs Male Oenocytes	Female Oenocytes	475.081	Male Oenocytes	721.79	enhancer of rudimentary protein	FALSE	FALSE	FALSE
Anogam_AGAP000516	-0.46514100823363	0.280947537254946	-1.65561518274331	0.0977997735167449	0.388147619074257	Female vs Male Oenocytes	Female Oenocytes	373.751	Male Oenocytes	529.814	enhancer of rudimentary protein	FALSE	FALSE	FALSE
Anogam_AGAP000519	-0.110704553842934	0.502683628471892	-0.220227092295536	0.825694297936069	0.957959773776928	Female vs Male Oenocytes	Female Oenocytes	68.4522	Male Oenocytes	76.0236	diacylglycerol kinase (ATP dependent)	FALSE	FALSE	FALSE
Anogam_AGAP000520	1.85276487747342	1.66665137115541	1.11166912861265	0.26628043793586	NA	Female vs Male Oenocytes	Female Oenocytes	6.05864	Male Oenocytes	1.72991		FALSE	FALSE	FALSE
Anogam_AGAP000521	0.358767713669183	1.25640117331572	0.285551877289619	0.775221365634426	0.943192514478255	Female vs Male Oenocytes	Female Oenocytes	18.4982	Male Oenocytes	14.9283		FALSE	FALSE	FALSE
Anogam_AGAP000522	0.799982684661497	2.81079572850752	0.284610751520628	0.775942373265185	NA	Female vs Male Oenocytes	Female Oenocytes	1.45279	Male Oenocytes	0.866464		FALSE	FALSE	FALSE
Anogam_AGAP000523	0.154524718560686	0.251343621660625	0.614794668508965	0.538690330678474	0.844605768286161	Female vs Male Oenocytes	Female Oenocytes	3972.14	Male Oenocytes	3688	F-type H+-transporting ATPase subunit c	FALSE	FALSE	FALSE
Anogam_AGAP000526	0.555903014117656	0.280731771944277	1.98019273083204	0.0476818763673806	0.256183090767933	Female vs Male Oenocytes	Female Oenocytes	421.701	Male Oenocytes	294.995	translation initiation factor 4B	FALSE	FALSE	FALSE
Anogam_AGAP000528	0.917107410084612	0.527341785332636	1.73911386427707	0.0820147364246905	0.354086532820386	Female vs Male Oenocytes	Female Oenocytes	1723.31	Male Oenocytes	924.888		FALSE	FALSE	FALSE
Anogam_AGAP000529	-0.697436949151366	0.416097338594894	-1.67613893303552	0.0937109822919249	0.379750848021067	Female vs Male Oenocytes	Female Oenocytes	827.388	Male Oenocytes	1387.15	vacuolar protein sorting-associated protein 16-like protein	FALSE	FALSE	FALSE
Anogam_AGAP000530	0.812195364331996	0.820873500136431	0.989428169135691	0.322453698026729	0.701546361676063	Female vs Male Oenocytes	Female Oenocytes	35.0547	Male Oenocytes	20.3475	Werner Syndrome-like exonuclease	FALSE	FALSE	FALSE
Anogam_AGAP000531	0.591779453272491	0.3870926580273	1.52877984379326	0.126319030811255	0.445971722676233	Female vs Male Oenocytes	Female Oenocytes	198.114	Male Oenocytes	135.941	lipoyl(octanoyl) transferase	FALSE	FALSE	FALSE
Anogam_AGAP000532	0.569513679492283	0.4220778960169	1.34930941626349	0.177237602382691	0.536297901232905	Female vs Male Oenocytes	Female Oenocytes	275.375	Male Oenocytes	189.314	histone deacetylase 6-10	FALSE	FALSE	FALSE
Anogam_AGAP000533	-0.139590541050885	0.583378662221267	-0.239279476762797	0.81088887841133	0.955331881506176	Female vs Male Oenocytes	Female Oenocytes	68.4799	Male Oenocytes	76.6092		FALSE	FALSE	FALSE
Anogam_AGAP000534	-0.538799520354918	0.38742004329317	-1.3907373396972	0.164305090322286	0.515085828441031	Female vs Male Oenocytes	Female Oenocytes	1589.99	Male Oenocytes	2397.74	glutathione synthase	FALSE	FALSE	FALSE
Anogam_AGAP000535	-3.50381181179994	1.96673789886665	-1.78153469957488	0.0748251414351524	0.335427594380665	Female vs Male Oenocytes	Female Oenocytes	1.44215	Male Oenocytes	16.6556		FALSE	FALSE	FALSE
Anogam_AGAP000536	0.0954014787638964	0.362011254332131	0.263531803562023	0.7921407139065	0.950344718782426	Female vs Male Oenocytes	Female Oenocytes	1950.4	Male Oenocytes	1868.83	PGRPS1 peptidoglycan recognition protein (short)	FALSE	FALSE	FALSE
Anogam_AGAP000537	-3.21827724941296	2.29013878649381	-1.40527607688795	0.159939199320883	NA	Female vs Male Oenocytes	Female Oenocytes	0.395324	Male Oenocytes	3.85119	TWDL8 cuticular protein TWDL family (TWDL8)	FALSE	FALSE	FALSE
Anogam_AGAP000538	NA	NA	NA	NA	NA	Female vs Male Oenocytes	Female Oenocytes	0	Male Oenocytes	0	TWDL9 cuticular protein TWDL family (TWDL9)	FALSE	FALSE	FALSE
Anogam_AGAP000539	3.37920352193474	3.94498991000203	0.856581030376578	0.391676473117943	NA	Female vs Male Oenocytes	Female Oenocytes	2.52255	Male Oenocytes	0		FALSE	FALSE	FALSE
Anogam_AGAP000540	-1.43667218961819	1.76239869867253	-0.815180010459787	0.414969278275638	NA	Female vs Male Oenocytes	Female Oenocytes	3.70485	Male Oenocytes	10.0694	proton-coupled amino acid transporter	FALSE	FALSE	FALSE
Anogam_AGAP000541	0.615454041803032	0.239345208783845	2.57140740326602	0.0101286097114087	0.0990093491097934	Female vs Male Oenocytes	Female Oenocytes	3774.46	Male Oenocytes	2540.64	RpS15a-1 40S ribosomal protein S15a	FALSE	FALSE	FALSE
Anogam_AGAP000543	1.03064774125706	0.395391528060564	2.60665104867698	0.00914324865897454	0.0932090300299428	Female vs Male Oenocytes	Female Oenocytes	268.061	Male Oenocytes	134.424	vitamin-K-epoxide reductase (warfarin-sensitive)	FALSE	FALSE	FALSE
Anogam_AGAP000544	0.347213921752695	0.362496338997931	0.957841181824119	0.338142849497369	0.712410276705015	Female vs Male Oenocytes	Female Oenocytes	200.018	Male Oenocytes	160.937	solute carrier family 352C member E1	FALSE	FALSE	FALSE
Anogam_AGAP000545	0.922402266456854	0.406025716018744	2.271782870064	0.0230996279887811	0.167542276845215	Female vs Male Oenocytes	Female Oenocytes	488.363	Male Oenocytes	263.539		FALSE	FALSE	FALSE
Anogam_AGAP000546	1.18275047796592	0.322287889817409	3.66985702949	0.000242686164242451	0.00653326562786027	Female vs Male Oenocytes	Female Oenocytes	623.119	Male Oenocytes	283.968	acyl-CoA-binding protein	FALSE	FALSE	FALSE
Anogam_AGAP000547	0.605464212968104	0.462580106754235	1.30888510795771	0.19057327182507	0.555756978365652	Female vs Male Oenocytes	Female Oenocytes	209.94	Male Oenocytes	141.567	rabenosyn-5	FALSE	FALSE	FALSE
Anogam_AGAP000548	0.410741396133545	2.19438612502847	0.187178268878371	0.851520862634609	NA	Female vs Male Oenocytes	Female Oenocytes	5.1723	Male Oenocytes	3.96051	SG1b salivary gland protein 1-like 2	FALSE	FALSE	FALSE
Anogam_AGAP000549	0.478526568743547	0.473700909882546	1.01018714290035	0.312405637941642	0.693817051157141	Female vs Male Oenocytes	Female Oenocytes	819.961	Male Oenocytes	609.459	2-oxoisovalerate dehydrogenase E2 component (dihydrolipoyl transacylase)	FALSE	FALSE	FALSE
Anogam_AGAP000550	-1.6372160023573	2.23305573666267	-0.733172923307387	NA	NA	Female vs Male Oenocytes	Female Oenocytes	346.896	Male Oenocytes	1045.71		FALSE	FALSE	FALSE
Anogam_AGAP000551	1.30997313246019	0.656747504680476	1.99463739583987	0.0460824418862386	0.251316416142574	Female vs Male Oenocytes	Female Oenocytes	316.461	Male Oenocytes	128.156	2-oxoglutarate dehydrogenase E1 component DHKTD1	FALSE	FALSE	FALSE
Anogam_AGAP000552	0.0961647117693347	0.387700490642132	0.248038664098828	0.804104491703218	0.953315887965695	Female vs Male Oenocytes	Female Oenocytes	1200.21	Male Oenocytes	1162.69	TBC domain-containing protein kinase-like protein	FALSE	FALSE	FALSE
Anogam_AGAP000553	2.01535358170802	1.00198707638918	2.01135686197738	0.0442877763797576	0.245598044926656	Female vs Male Oenocytes	Female Oenocytes	41.2353	Male Oenocytes	10.7148	white protein white	FALSE	FALSE	FALSE
Anogam_AGAP000554	1.49581813012983	0.667044007572191	2.24245793853105	0.024931790832211	0.175534697593272	Female vs Male Oenocytes	Female Oenocytes	226.766	Male Oenocytes	81.066		FALSE	FALSE	FALSE
Anogam_AGAP000555	1.11541842009744	0.775570125413049	1.4381915748797	0.150379705065602	0.488890123620984	Female vs Male Oenocytes	Female Oenocytes	158.624	Male Oenocytes	73.7611	mal Molybdenum cofactor sulfurase	FALSE	FALSE	FALSE
Anogam_AGAP000556	1.57594814999385	0.584901800495042	2.69438074675103	0.00705195567561636	0.0770791632170484	Female vs Male Oenocytes	Female Oenocytes	96.8232	Male Oenocytes	33.7525	selenoprotein W-related protein	FALSE	FALSE	FALSE
Anogam_AGAP000558	-0.39277718097264	0.425016896011214	-0.924144862613359	0.355410898285147	0.728635460082921	Female vs Male Oenocytes	Female Oenocytes	580.976	Male Oenocytes	775.578	mannosyl-oligosaccharide alpha-12C2-mannosidase	FALSE	FALSE	FALSE
Anogam_AGAP000559	2.2036558420617	1.19753591806199	1.84015845272345	0.065744977690551	0.309878576537807	Female vs Male Oenocytes	Female Oenocytes	19.1423	Male Oenocytes	4.27377		FALSE	FALSE	FALSE
Anogam_AGAP000560	1.28238624695931	0.594387143252527	2.15749324580274	0.03096725283137	0.198190418120768	Female vs Male Oenocytes	Female Oenocytes	98.2755	Male Oenocytes	40.8922	spastic paraplegia 7	FALSE	FALSE	FALSE
Anogam_AGAP000561	0.255561550040166	0.344421434968323	0.742002454242344	0.458085848617143	0.803980958180071	Female vs Male Oenocytes	Female Oenocytes	1142.04	Male Oenocytes	977.766	kinesin family member 5	FALSE	FALSE	FALSE
Anogam_AGAP000562	0.15606632065493	0.329679524477114	0.473387969430186	0.635936411370327	0.892532792847074	Female vs Male Oenocytes	Female Oenocytes	2693.12	Male Oenocytes	2470.85	Moe Moesin-ezrin-radixin homolog 1	FALSE	FALSE	FALSE
Anogam_AGAP000563	0.402095304536846	0.493775987513062	0.814327376594451	0.415457430391558	0.774303079059431	Female vs Male Oenocytes	Female Oenocytes	65.3429	Male Oenocytes	50.2715	Arf-GAP with coiled-coil2C ANK repeat and PH domain-containing protein	FALSE	FALSE	FALSE
Anogam_AGAP000564	0.462009580938946	0.393559107253754	1.17392679377397	0.240424349268157	0.61762684106539	Female vs Male Oenocytes	Female Oenocytes	222.741	Male Oenocytes	167.375	C-factor	FALSE	FALSE	FALSE
Anogam_AGAP000565	-0.00532801266767201	0.421108362772141	-0.012652355399921	0.989905150303449	0.997715588048303	Female vs Male Oenocytes	Female Oenocytes	5662.03	Male Oenocytes	5800.62	TRXR thioredoxin reductase	FALSE	FALSE	FALSE
Anogam_AGAP000566	-0.402356762976973	0.822924201637387	-0.48893538697294	0.624887441739641	0.886869540745131	Female vs Male Oenocytes	Female Oenocytes	30.363	Male Oenocytes	41.8775		FALSE	FALSE	FALSE
Anogam_AGAP000567	0.145858736450532	0.311226798538964	0.468657381482757	0.639314554666674	0.89402455773761	Female vs Male Oenocytes	Female Oenocytes	688.881	Male Oenocytes	636.209	palmitoyltransferase ZDHHC9	FALSE	FALSE	FALSE
Anogam_AGAP000569	1.39414947043401	1.39520002564632	0.999247021794011	0.317675042418639	0.698076273566892	Female vs Male Oenocytes	Female Oenocytes	13.6828	Male Oenocytes	5.3716	forkhead box protein P	FALSE	FALSE	FALSE
Anogam_AGAP000570	-5.67915507233082	1.87463585623053	-3.0294710588489	NA	NA	Female vs Male Oenocytes	Female Oenocytes	88.144	Male Oenocytes	4621.08		FALSE	FALSE	FALSE
Anogam_AGAP000571	2.45884113571948	2.07654720579022	1.18410076537787	0.236373177199899	NA	Female vs Male Oenocytes	Female Oenocytes	10.498	Male Oenocytes	2.06432	CLIPC5 CLIP-domain serine protease	FALSE	FALSE	FALSE
Anogam_AGAP000572	0.198245419266285	0.593784151172156	0.333867818591889	0.738479304772796	0.931371216130695	Female vs Male Oenocytes	Female Oenocytes	87.5672	Male Oenocytes	78.3922	CLIPC10 CLIP-domain serine protease	FALSE	FALSE	FALSE
Anogam_AGAP000573	-0.423529216888016	0.577279010234145	-0.733664674065027	0.4631531335533	0.806325425505616	Female vs Male Oenocytes	Female Oenocytes	203.111	Male Oenocytes	280.045	CLIPC4 CLIP-domain serine protease	FALSE	FALSE	FALSE
Anogam_AGAP000574	-1.58709187895307	1.01904601417128	-1.55742906294937	0.119368650422696	0.43320092250405	Female vs Male Oenocytes	Female Oenocytes	22.6255	Male Oenocytes	68.3088	PDGF- and VEGF-related factor 1	FALSE	FALSE	FALSE
Anogam_AGAP000575	6.038522984737	2.03515675770044	2.96710460355891	0.00300618664499797	0.0451194030966066	Female vs Male Oenocytes	Female Oenocytes	15.7389	Male Oenocytes	0	kinesin family member 4-7-21-27	FALSE	FALSE	FALSE
Anogam_AGAP000576	0.101250757937203	0.575264200704186	0.176007402882468	0.860288126582187	0.965980865262181	Female vs Male Oenocytes	Female Oenocytes	247.622	Male Oenocytes	233.055		FALSE	FALSE	FALSE
Anogam_AGAP000577	0.211693459857381	0.707001946381649	0.299424154262661	0.76461643463588	0.938823263830985	Female vs Male Oenocytes	Female Oenocytes	662.722	Male Oenocytes	576.578	AMP deaminase	FALSE	FALSE	FALSE
Anogam_AGAP000578	-0.184581532504095	0.450617872957362	-0.409618755893335	0.682085636090845	0.909794033789489	Female vs Male Oenocytes	Female Oenocytes	506.63	Male Oenocytes	587.459		FALSE	FALSE	FALSE
Anogam_AGAP000579	-10.0839927462504	3.90730785864949	-2.58080323103483	NA	NA	Female vs Male Oenocytes	Female Oenocytes	0	Male Oenocytes	217.404	Niemann-Pick C1 protein	FALSE	FALSE	FALSE
Anogam_AGAP000580	NA	NA	NA	NA	NA	Female vs Male Oenocytes	Female Oenocytes	0	Male Oenocytes	0	OBP38 odorant-binding protein 38	FALSE	FALSE	FALSE
Anogam_AGAP000581	0.773226209379137	2.80763441771918	0.275401314536983	0.783007934266381	NA	Female vs Male Oenocytes	Female Oenocytes	1.49096	Male Oenocytes	0.863119		FALSE	FALSE	FALSE
Anogam_AGAP000585	0.0930084148873756	0.479487718162575	0.193974551097553	0.846195808706603	0.964460550763485	Female vs Male Oenocytes	Female Oenocytes	94.0239	Male Oenocytes	90.2614		FALSE	FALSE	FALSE
Anogam_AGAP000586	-0.357340568686563	0.610816404095556	-0.58502123762652	0.558533436700809	0.852696876304724	Female vs Male Oenocytes	Female Oenocytes	1811.29	Male Oenocytes	2354.06		FALSE	FALSE	FALSE
Anogam_AGAP000587	0.975786035083668	0.653129697225283	1.49401572035254	0.135171510459774	0.461348853913771	Female vs Male Oenocytes	Female Oenocytes	45.0447	Male Oenocytes	23.3012		FALSE	FALSE	FALSE
Anogam_AGAP000588	2.0148778409512	1.73020129964143	1.16453376920291	0.244207766452207	NA	Female vs Male Oenocytes	Female Oenocytes	7.01976	Male Oenocytes	1.75258		FALSE	FALSE	FALSE
Anogam_AGAP000589	1.2563873677806	0.818572808573332	1.53485109036339	0.124820409810491	0.443524763864551	Female vs Male Oenocytes	Female Oenocytes	52.3205	Male Oenocytes	22.1597	poly(ADP-ribose) glycohydrolase	FALSE	FALSE	FALSE
Anogam_AGAP000591	0.179135432875399	0.337108049831511	0.531388772724154	0.595149400026363	0.872595175637036	Female vs Male Oenocytes	Female Oenocytes	117.231	Male Oenocytes	106.404	decaprenyl-diphosphate synthase subunit 1	FALSE	FALSE	FALSE
Anogam_AGAP000592	-3.1733273048902	3.97144811503682	-0.79903531733809	0.424269933644543	NA	Female vs Male Oenocytes	Female Oenocytes	0	Male Oenocytes	1.82265		FALSE	FALSE	FALSE
Anogam_AGAP000594	-0.915904239869468	0.616213557226651	-1.48634224146514	0.137188618914356	0.465540459409126	Female vs Male Oenocytes	Female Oenocytes	49.6234	Male Oenocytes	97.8299		FALSE	FALSE	FALSE
Anogam_AGAP000595	-0.515825284058925	0.478858465253912	-1.07719779744399	0.281391909072478	0.663607340212311	Female vs Male Oenocytes	Female Oenocytes	146.181	Male Oenocytes	216.904	lysophosphatidylcholine acyltransferase 2B	FALSE	FALSE	FALSE
Anogam_AGAP000596	0.279164573739147	0.226686552939259	1.23150036964896	0.218135778495294	0.59379671617455	Female vs Male Oenocytes	Female Oenocytes	649.006	Male Oenocytes	549.479	lysophosphatidylcholine acyltransferase - lyso-PAF acetyltransferase	FALSE	FALSE	FALSE
Anogam_AGAP000597	1.86961399558598	0.748830193841969	2.49671288759563	0.0125350402183318	0.112782112521436	Female vs Male Oenocytes	Female Oenocytes	62.3416	Male Oenocytes	17.7518	DNA cross-link repair 1C protein	FALSE	FALSE	FALSE
Anogam_AGAP000598	0.251556601341149	0.348288418914043	0.722265190802203	0.470131449765255	0.811544975879769	Female vs Male Oenocytes	Female Oenocytes	214.508	Male Oenocytes	185.636	scaffold protein Nfu-NifU	FALSE	FALSE	FALSE
Anogam_AGAP000599	-0.509335208990123	0.684581456335744	-0.744009648926755	0.456870637715145	0.803372318885315	Female vs Male Oenocytes	Female Oenocytes	48.2741	Male Oenocytes	69.9814	XK-related protein	FALSE	FALSE	FALSE
Anogam_AGAP000601	0.364903907470351	0.346913373620516	1.0518588651169	0.292864306962799	0.673336463545739	Female vs Male Oenocytes	Female Oenocytes	949.138	Male Oenocytes	750.816	protein halfway	FALSE	FALSE	FALSE
Anogam_AGAP000602	0.306063673393653	0.564079788821002	0.542589327714373	0.587412588639375	0.867689142400098	Female vs Male Oenocytes	Female Oenocytes	51.9423	Male Oenocytes	43.3305	phosphoinositide-3-kinase2C regulatory subunit 4	FALSE	FALSE	FALSE
Anogam_AGAP000603	-8.04357383724319	2.09436360459931	-3.84058136780985	0.000122743278877353	0.00366286101424031	Female vs Male Oenocytes	Female Oenocytes	0	Male Oenocytes	57.4019		FALSE	FALSE	FALSE
Anogam_AGAP000604	-9.13719937410894	1.93850314886039	-4.71353341854541	2.43457775210977e-06	0.000159833956164316	Female vs Male Oenocytes	Female Oenocytes	0	Male Oenocytes	121.246		FALSE	FALSE	FALSE
Anogam_AGAP000605	-2.99120772698719	1.42277003024016	-2.10238314232855	0.0355197266885313	NA	Female vs Male Oenocytes	Female Oenocytes	1.57595	Male Oenocytes	12.4133		FALSE	FALSE	FALSE
Anogam_AGAP000606	1.39015994400117	1.5479316215802	0.898075809435323	0.369145134692178	NA	Female vs Male Oenocytes	Female Oenocytes	8.36343	Male Oenocytes	3.27368	GPRNNA19 putative GPCR class a orphan receptor 19	FALSE	FALSE	FALSE
Anogam_AGAP000607	1.57289504991847	4.03888814789479	0.389437635389412	0.696952436041503	NA	Female vs Male Oenocytes	Female Oenocytes	0.743605	Male Oenocytes	0	SG1c salivary gland protein 1-like 3	FALSE	FALSE	FALSE
Anogam_AGAP000609	0.318365829792015	3.04645061194231	0.104503853942026	0.916769510024235	NA	Female vs Male Oenocytes	Female Oenocytes	2.23798	Male Oenocytes	1.78026	SG1e salivary gland protein 1-like 5	FALSE	FALSE	FALSE
Anogam_AGAP000610	6.12242974124935	1.69868766158689	3.60421158032658	0.000313101923191668	0.00794544930273918	Female vs Male Oenocytes	Female Oenocytes	109.117	Male Oenocytes	1.44145	SG1f salivary gland protein 1-like 6	FALSE	FALSE	FALSE
Anogam_AGAP000611	5.99766244599428	2.71312165217829	2.2106131662688	0.0270626362249717	0.184206947307901	Female vs Male Oenocytes	Female Oenocytes	15.3618	Male Oenocytes	0	SG1d salivary gland protein 1-like 4	FALSE	FALSE	FALSE
Anogam_AGAP000612	10.0321620370559	3.90714099910047	2.56764781188229	0.0102391125754734	0.0997063005793671	Female vs Male Oenocytes	Female Oenocytes	258.464	Male Oenocytes	0	SG1 salivary gland protein 1	FALSE	FALSE	FALSE
Anogam_AGAP000614	0.257634585360081	0.553457798005587	0.465499964565464	0.641573462284027	0.894826144764564	Female vs Male Oenocytes	Female Oenocytes	57.3206	Male Oenocytes	48.6491		FALSE	FALSE	FALSE
Anogam_AGAP000615	0.02941975364457	0.426634291884642	0.0689577800101563	0.945023226132125	0.988804262101975	Female vs Male Oenocytes	Female Oenocytes	240.274	Male Oenocytes	240.823		FALSE	FALSE	FALSE
Anogam_AGAP000616	-0.181576986003293	0.491755926943012	-0.36924208953019	0.711947286076567	0.922313887092953	Female vs Male Oenocytes	Female Oenocytes	842.051	Male Oenocytes	994.491	26S proteasome regulatory subunit T5	FALSE	FALSE	FALSE
Anogam_AGAP000617	0.0123943555722624	0.29554406243401	0.0419374203297685	0.966548585516659	0.993361316512332	Female vs Male Oenocytes	Female Oenocytes	537.745	Male Oenocytes	549.391	dual specificity phosphatase	FALSE	FALSE	FALSE
Anogam_AGAP000618	-0.160311236387051	0.28661994412745	-0.559316403731368	0.575945802178526	0.861156034733882	Female vs Male Oenocytes	Female Oenocytes	1298.8	Male Oenocytes	1499.89	succinate dehydrogenase (ubiquinone) membrane anchor subunit	FALSE	FALSE	FALSE
Anogam_AGAP000619	0.249561588430166	0.474258901895925	0.526213819988415	0.598739652920055	0.874214825117338	Female vs Male Oenocytes	Female Oenocytes	145.355	Male Oenocytes	124.587	inhibitor of growth protein 3	FALSE	FALSE	FALSE
Anogam_AGAP000620	-0.573610748484647	0.446480570609489	-1.28473843263015	0.198883703280901	0.567538015868326	Female vs Male Oenocytes	Female Oenocytes	80.5319	Male Oenocytes	123.151		FALSE	FALSE	FALSE
Anogam_AGAP000621	-2.24292292353559	1.4351836588393	-1.56281247331755	0.118096709468555	NA	Female vs Male Oenocytes	Female Oenocytes	2.17901	Male Oenocytes	10.5832	carboxypeptidase A1	FALSE	FALSE	FALSE
Anogam_AGAP000622	1.30126540790513	0.688968050814981	1.88871661953825	0.0589298104709955	0.291384718830345	Female vs Male Oenocytes	Female Oenocytes	128.906	Male Oenocytes	52.6852		FALSE	FALSE	FALSE
Anogam_AGAP000623	0.520809572837792	0.816333682310519	0.637986137437956	0.523482704045672	0.84130979841272	Female vs Male Oenocytes	Female Oenocytes	151.947	Male Oenocytes	105.668	DNA ligase 4	FALSE	FALSE	FALSE
Anogam_AGAP000624	-0.429594262829843	0.483519882037853	-0.88847279871774	0.374286481374015	0.745496033365038	Female vs Male Oenocytes	Female Oenocytes	714.469	Male Oenocytes	1003.45		FALSE	FALSE	FALSE
Anogam_AGAP000625	0.131854839559365	0.315374877297524	0.418089229837334	0.675881879136846	0.908114065623983	Female vs Male Oenocytes	Female Oenocytes	578.934	Male Oenocytes	542.724	vacuolar protein-sorting-associated protein 4	FALSE	FALSE	FALSE
Anogam_AGAP000626	-0.319459554146816	0.396088393078628	-0.806536015013697	0.419933850494452	0.779647302067423	Female vs Male Oenocytes	Female Oenocytes	70.8611	Male Oenocytes	90.6168	Vesicle-associated membrane protein-associated protein B	FALSE	FALSE	FALSE
Anogam_AGAP000627	-0.0739757077435908	0.215444196796852	-0.343363659097973	0.731324895322229	0.929858277455314	Female vs Male Oenocytes	Female Oenocytes	1316.42	Male Oenocytes	1422.21	casein kinase 12C alpha	FALSE	FALSE	FALSE
Anogam_AGAP000628	0.129874083384539	2.19527696910961	0.0591606823248434	0.952824125722788	NA	Female vs Male Oenocytes	Female Oenocytes	3.52511	Male Oenocytes	3.27488		FALSE	FALSE	FALSE
Anogam_AGAP000629	1.18573278949841	0.638005421655882	1.85849955071064	0.0630981071295538	0.301590576867233	Female vs Male Oenocytes	Female Oenocytes	221.246	Male Oenocytes	100.862		FALSE	FALSE	FALSE
Anogam_AGAP000630	-1.09639719828887	0.385995954619616	-2.84043701797168	0.00450517681720833	0.0570207453879502	Female vs Male Oenocytes	Female Oenocytes	127.535	Male Oenocytes	279.712		FALSE	FALSE	FALSE
Anogam_AGAP000631	-0.0137968880264169	0.527946104395185	-0.0261331372872287	0.979151146349208	0.995531112727024	Female vs Male Oenocytes	Female Oenocytes	473.323	Male Oenocytes	484.983	integrator complex subunit 6	FALSE	FALSE	FALSE
Anogam_AGAP000633	-0.704105859003164	0.359095875146366	-1.96077400977155	0.0499053911692744	0.263537758452795	Female vs Male Oenocytes	Female Oenocytes	573.413	Male Oenocytes	963.304		FALSE	FALSE	FALSE
Anogam_AGAP000634	0.733096386077258	0.600610510919651	1.220585342329	0.222243058851933	0.599084865397952	Female vs Male Oenocytes	Female Oenocytes	124.109	Male Oenocytes	76.6976	Regulator of telomere elongation helicase 1 homolog	FALSE	FALSE	FALSE
Anogam_AGAP000635	1.27105101297539	1.2667374418712	1.00340526060225	0.315665366951362	0.695886216225533	Female vs Male Oenocytes	Female Oenocytes	33.1869	Male Oenocytes	13.6878		FALSE	FALSE	FALSE
Anogam_AGAP000636	0.153929571909478	0.601948995814423	0.255718628953297	0.798168109504815	0.951741115809819	Female vs Male Oenocytes	Female Oenocytes	84.9138	Male Oenocytes	77.6323		FALSE	FALSE	FALSE
Anogam_AGAP000637	1.03781464189536	0.695343473142271	1.4925208648403	0.135562651612341	0.461984441663492	Female vs Male Oenocytes	Female Oenocytes	152.231	Male Oenocytes	74.7566	solute carrier family 6 (neurotransmitter transporter2C amino acid-orphan)	FALSE	FALSE	FALSE
Anogam_AGAP000638	4.73923000843153	3.92169725298132	1.20846401512221	0.226868829289567	NA	Female vs Male Oenocytes	Female Oenocytes	7.02248	Male Oenocytes	0	OBP32 odorant-binding protein 32	FALSE	FALSE	FALSE
Anogam_AGAP000639	0.456578702636982	0.39493540987819	1.15608449183578	0.247646598722152	0.628021455976509	Female vs Male Oenocytes	Female Oenocytes	244.322	Male Oenocytes	183.744	tRNA dimethylallyltransferase	FALSE	FALSE	FALSE
Anogam_AGAP000640	4.83990161647693	2.34841869709526	2.06091938480279	0.0393107316042957	NA	Female vs Male Oenocytes	Female Oenocytes	7.03524	Male Oenocytes	0	OBP33 odorant-binding protein 33	FALSE	FALSE	FALSE
Anogam_AGAP000641	1.34896347096621	2.27420172418931	0.593159110125589	0.553074674771429	0.850035929689482	Female vs Male Oenocytes	Female Oenocytes	12.7989	Male Oenocytes	5.24782	OBP34 odorant-binding protein 34	FALSE	FALSE	FALSE
Anogam_AGAP000642	-2.30589937344931	4.02387505139452	-0.573054417445238	0.566607849220618	NA	Female vs Male Oenocytes	Female Oenocytes	0	Male Oenocytes	1.10596	OBP35 odorant-binding protein 35	FALSE	FALSE	FALSE
Anogam_AGAP000643	-2.30589937344931	4.02387505139452	-0.573054417445238	0.566607849220618	NA	Female vs Male Oenocytes	Female Oenocytes	0	Male Oenocytes	1.10596	OBP36 odorant-binding protein 36	FALSE	FALSE	FALSE
Anogam_AGAP000644	-1.23396113827818	4.0804728567969	-0.302406407684529	0.762342270655386	NA	Female vs Male Oenocytes	Female Oenocytes	0	Male Oenocytes	0.484343	OBP37 odorant-binding protein 37	FALSE	FALSE	FALSE
Anogam_AGAP000646	0.665586034187716	0.478112792928209	1.39211090778668	0.163888815674732	0.514891197377607	Female vs Male Oenocytes	Female Oenocytes	424.367	Male Oenocytes	272.042	Myc proto-oncogene protein	FALSE	FALSE	FALSE
Anogam_AGAP000647	0.689592213364309	4.0804728567969	0.168998113102418	0.865798125578915	NA	Female vs Male Oenocytes	Female Oenocytes	0.399987	Male Oenocytes	0		FALSE	FALSE	FALSE
Anogam_AGAP000648	0.252826383447025	0.661550981518018	0.382172184019561	0.702333652658348	0.917922842210551	Female vs Male Oenocytes	Female Oenocytes	45.0004	Male Oenocytes	38.7781		FALSE	FALSE	FALSE
Anogam_AGAP000649	0.831101426773307	0.599033664419901	1.38740354029709	0.165318746070534	0.516166405661325	Female vs Male Oenocytes	Female Oenocytes	102.605	Male Oenocytes	59.6336	epimerase	FALSE	FALSE	FALSE
Anogam_AGAP000650	1.19822714337747	0.504531433641365	2.37493060586826	0.0175522497242021	0.140197561376358	Female vs Male Oenocytes	Female Oenocytes	378.529	Male Oenocytes	171.367	ribonucleases P-MRP protein subunit RPP40	FALSE	FALSE	FALSE
Anogam_AGAP000651	0.02333848531545	0.3278309024887	0.0711906203420052	0.9432460463597	0.988383957219693	Female vs Male Oenocytes	Female Oenocytes	34297.8	Male Oenocytes	34436.4	Actin5C Actin-5C	FALSE	FALSE	FALSE
Anogam_AGAP000652	0.872789215268284	0.304350280665198	2.86771286479738	0.0041345057304487	0.0547109626957685	Female vs Male Oenocytes	Female Oenocytes	970.534	Male Oenocytes	544.998	mRpL38 39S ribosomal protein L382C mitochondrial	FALSE	FALSE	FALSE
Anogam_AGAP000653	0.00570482643004966	0.240363631578734	0.0237341497654189	0.981064666098475	0.996239301688263	Female vs Male Oenocytes	Female Oenocytes	519.972	Male Oenocytes	531.3	xenotropic and polytropic retrovirus receptor 1	FALSE	FALSE	FALSE
Anogam_AGAP000654	0.903620719789515	0.230087440512736	3.9272926752362	8.59074183084266e-05	0.00273185590220797	Female vs Male Oenocytes	Female Oenocytes	3140.13	Male Oenocytes	1731.51	RpS30 40S ribosomal protein S30	FALSE	FALSE	FALSE
Anogam_AGAP000655	0.856835041573731	0.260684523830048	3.28686578314998	0.00101309106707462	0.020135184958108	Female vs Male Oenocytes	Female Oenocytes	3577.37	Male Oenocytes	2030.25	RpS14-1 40S ribosomal protein S14a	FALSE	FALSE	FALSE
Anogam_AGAP000656	0.497400597321355	0.380610846303184	1.30684819456023	0.191264273385534	0.556177473718827	Female vs Male Oenocytes	Female Oenocytes	312.986	Male Oenocytes	226.663	Polypeptide N-acetylgalactosaminyltransferase	FALSE	FALSE	FALSE
Anogam_AGAP000657	1.26470112624512	1.90706308156024	0.663166907520659	0.507223663175546	NA	Female vs Male Oenocytes	Female Oenocytes	4.28872	Male Oenocytes	1.89501	amiloride-sensitive sodium channel	FALSE	FALSE	FALSE
Anogam_AGAP000658	2.81186743660825	1.42165578090006	1.97788204035441	0.0479420154643588	0.256902553641556	Female vs Male Oenocytes	Female Oenocytes	33.6696	Male Oenocytes	5.01373	GPRGHP3 putative growth hormone releasing hormone receptor 3	FALSE	FALSE	FALSE
Anogam_AGAP000659	-0.00799896523858376	0.437943637235722	-0.0182648280702805	0.985427585917312	0.996443937093694	Female vs Male Oenocytes	Female Oenocytes	157.502	Male Oenocytes	161.113	Sidekick homolog 2	FALSE	FALSE	FALSE
Anogam_AGAP000660	0.103921461233442	0.358727551352381	0.289694674528521	0.772049830823418	0.941731354419592	Female vs Male Oenocytes	Female Oenocytes	393.681	Male Oenocytes	375.405		FALSE	FALSE	FALSE
Anogam_AGAP000662	0.758016494910291	0.309836959841562	2.44650120275486	0.0144250316104299	0.122938962870799	Female vs Male Oenocytes	Female Oenocytes	435.383	Male Oenocytes	264.046	forkhead box protein K	FALSE	FALSE	FALSE
Anogam_AGAP000663	-1.07506847730262	1.03631378219044	-1.03739668021231	NA	NA	Female vs Male Oenocytes	Female Oenocytes	240.702	Male Oenocytes	505.104	solute carrier family 41	FALSE	FALSE	FALSE
Anogam_AGAP000666	0.428472243653168	0.503244395482552	0.851419802186399	0.394536195537249	0.758950532724734	Female vs Male Oenocytes	Female Oenocytes	166.784	Male Oenocytes	125.964	ubiquitin carboxyl-terminal hydrolase 16-45	FALSE	FALSE	FALSE
Anogam_AGAP000667	1.70614377756533	2.13223753733326	0.800165904451324	0.423614681309566	NA	Female vs Male Oenocytes	Female Oenocytes	9.40499	Male Oenocytes	2.81005	GPRDOP2 GPCR Dopamine Family 2	FALSE	FALSE	FALSE
Anogam_AGAP000668	0.93289278774494	0.389055768254238	2.3978382120666	0.0164921478358856	0.134474436200298	Female vs Male Oenocytes	Female Oenocytes	115.195	Male Oenocytes	61.9406	bromodomain adjacent to zinc finger domain protein 1A	FALSE	FALSE	FALSE
Anogam_AGAP000669	0.373882093659865	0.269745225393546	1.38605639122764	0.165729684976518	0.51654118700261	Female vs Male Oenocytes	Female Oenocytes	2093.98	Male Oenocytes	1670.93		FALSE	FALSE	FALSE
Anogam_AGAP000670	0.367429256323837	0.562609699194911	0.653080202580269	0.513704574594599	0.836316114499765	Female vs Male Oenocytes	Female Oenocytes	287.215	Male Oenocytes	231.199	periplasmic divalent cation tolerance protein	FALSE	FALSE	FALSE
Anogam_AGAP000671	0.917397764572657	0.835209928828126	1.09840380592679	0.272028201218847	0.651484814215813	Female vs Male Oenocytes	Female Oenocytes	62.2541	Male Oenocytes	33.1312	Ras-related protein Rab-10	FALSE	FALSE	FALSE
Anogam_AGAP000672	0.725384690268609	0.245185776726031	2.95851048113263	0.00309129729099449	0.0458262082329376	Female vs Male Oenocytes	Female Oenocytes	1130.05	Male Oenocytes	703.656	Obg-like ATPase 1	FALSE	FALSE	FALSE
Anogam_AGAP000673	-0.0764528357918784	1.71258452004343	-0.044641788418092	0.964392833503891	NA	Female vs Male Oenocytes	Female Oenocytes	2.19744	Male Oenocytes	2.38683		FALSE	FALSE	FALSE
Anogam_AGAP000674	1.63268843545756	3.17326278952702	0.514514095979083	0.606892607742574	NA	Female vs Male Oenocytes	Female Oenocytes	2.82702	Male Oenocytes	0.98771	transcription factor Sp2C invertebrate	FALSE	FALSE	FALSE
Anogam_AGAP000675	-0.300763607424675	0.478820435573008	-0.628134442642886	0.529915871736922	0.843620762014224	Female vs Male Oenocytes	Female Oenocytes	164.975	Male Oenocytes	207.291	uncharacterized protein FAM107B	FALSE	FALSE	FALSE
Anogam_AGAP000676	0.884255863100728	0.927004688012933	0.953884995982233	0.340141859098697	0.714314651725659	Female vs Male Oenocytes	Female Oenocytes	72.0793	Male Oenocytes	39.5406		FALSE	FALSE	FALSE
Anogam_AGAP000678	-1.00341207966485	0.617863384782067	-1.62400314435007	0.104375137474857	0.4012547785962	Female vs Male Oenocytes	Female Oenocytes	45.2601	Male Oenocytes	93.4745	WD repeat-containing protein 68	FALSE	FALSE	FALSE
Anogam_AGAP000679	0.961985120557708	0.632930500907934	1.51989060280354	0.128538472641822	0.450130597009672	Female vs Male Oenocytes	Female Oenocytes	22599.1	Male Oenocytes	11654.8	Aminoacylase	FALSE	FALSE	FALSE
Anogam_AGAP000680	1.81469274044237	0.699909464417733	2.59275353841949	0.00952109740212455	0.094893914950068	Female vs Male Oenocytes	Female Oenocytes	109.334	Male Oenocytes	32.4506		FALSE	FALSE	FALSE
Anogam_AGAP000681	1.17678643323959	0.461438403292486	2.55025681617071	0.0107643592216459	0.102372074242494	Female vs Male Oenocytes	Female Oenocytes	213.974	Male Oenocytes	96.5772	tRNA-m4X modification enzyme	FALSE	FALSE	FALSE
Anogam_AGAP000682	-0.131417536315311	0.327678113801003	-0.401056801721949	0.688378304382221	0.911125008342444	Female vs Male Oenocytes	Female Oenocytes	392.937	Male Oenocytes	441.966	MAX-like protein X	FALSE	FALSE	FALSE
Anogam_AGAP000684	1.04571914879671	0.361058178931622	2.8962621810452	0.00377636752433746	0.0520004275069797	Female vs Male Oenocytes	Female Oenocytes	343.262	Male Oenocytes	170.661		FALSE	FALSE	FALSE
Anogam_AGAP000685	1.31487886061478	0.959480411530351	1.37040719624237	0.170559826964524	0.525466787523765	Female vs Male Oenocytes	Female Oenocytes	830.029	Male Oenocytes	331.278		FALSE	FALSE	FALSE
Anogam_AGAP000686	3.21037658023915	1.55615698060983	2.06301589122523	0.0391111183825728	0.227685778410218	Female vs Male Oenocytes	Female Oenocytes	27.0296	Male Oenocytes	3.02416		FALSE	FALSE	FALSE
Anogam_AGAP000687	NA	NA	NA	NA	NA	Female vs Male Oenocytes	Female Oenocytes	0	Male Oenocytes	0		FALSE	FALSE	FALSE
Anogam_AGAP000688	3.66643765306488	2.05225859207917	1.7865378501597	0.0740122144316969	NA	Female vs Male Oenocytes	Female Oenocytes	6.01534	Male Oenocytes	0.354267	carbonic anhydrase-related protein 10	FALSE	FALSE	FALSE
Anogam_AGAP000689	0.118003220333911	1.26920940377156	0.0929737992668934	NA	NA	Female vs Male Oenocytes	Female Oenocytes	350.022	Male Oenocytes	315.138		FALSE	FALSE	FALSE
Anogam_AGAP000690	-0.209581224875133	0.948232374609253	-0.221023064058003	0.825074474522524	0.957568185759717	Female vs Male Oenocytes	Female Oenocytes	35.1614	Male Oenocytes	41.1628		FALSE	FALSE	FALSE
Anogam_AGAP000691	1.51911382115398	1.33526741696072	1.13768508229739	0.255252004733635	0.635538145380345	Female vs Male Oenocytes	Female Oenocytes	49.772	Male Oenocytes	17.1508		FALSE	FALSE	FALSE
Anogam_AGAP000692	-4.55220694029889	2.44390229402292	-1.86267959706584	0.0625073580998373	0.300778017155865	Female vs Male Oenocytes	Female Oenocytes	49.9195	Male Oenocytes	1209.98	CEC2 cecropin anti-microbial peptide	FALSE	FALSE	FALSE
Anogam_AGAP000693	1.15933258375487	1.78238709460963	0.650438160857973	NA	NA	Female vs Male Oenocytes	Female Oenocytes	2277.9	Male Oenocytes	991.251	CEC1 cecropin anti-microbial peptide	FALSE	FALSE	FALSE
Anogam_AGAP000694	0.392082885564201	1.79457590565361	0.218482196450419	NA	NA	Female vs Male Oenocytes	Female Oenocytes	853.926	Male Oenocytes	632.179	CEC3 cecropin anti-microbial peptide	FALSE	FALSE	FALSE
Anogam_AGAP000695	0.315058393825289	1.2609795636971	0.249852101410399	NA	NA	Female vs Male Oenocytes	Female Oenocytes	225.306	Male Oenocytes	177.402		FALSE	FALSE	FALSE
Anogam_AGAP000696	2.92252198605005	2.28328033219528	1.27996634703202	0.200556971739682	NA	Female vs Male Oenocytes	Female Oenocytes	3.78959	Male Oenocytes	0.536575		FALSE	FALSE	FALSE
Anogam_AGAP000697	6.67502435522962	1.66734953458979	4.00337434758204	6.24453739167685e-05	0.00215404788127809	Female vs Male Oenocytes	Female Oenocytes	25.2849	Male Oenocytes	0		FALSE	FALSE	FALSE
Anogam_AGAP000698	-0.40395006794621	0.343839559189375	-1.1748213873312	0.24006618171702	0.617209061433148	Female vs Male Oenocytes	Female Oenocytes	525.883	Male Oenocytes	717.272		FALSE	FALSE	FALSE
Anogam_AGAP000699	0.0586154182546277	0.316143225268982	0.185407794852338	0.852909195009323	0.964978216171848	Female vs Male Oenocytes	Female Oenocytes	308.598	Male Oenocytes	303.377		FALSE	FALSE	FALSE
Anogam_AGAP000700	-0.131054178716312	0.25715088667082	-0.509639225487391	0.610304237807142	0.878911871329066	Female vs Male Oenocytes	Female Oenocytes	1166.62	Male Oenocytes	1315.05	Vesicle-associated membrane protein 7	FALSE	FALSE	FALSE
Anogam_AGAP000702	1.1550954254908	0.781790667229614	1.47749963501616	0.139541756053997	0.470346773635467	Female vs Male Oenocytes	Female Oenocytes	48.5052	Male Oenocytes	22.6111		FALSE	FALSE	FALSE
Anogam_AGAP000703	1.18605416092495	0.673036072010922	1.76224456644829	0.0780279852658306	0.343728475352854	Female vs Male Oenocytes	Female Oenocytes	143.046	Male Oenocytes	63.7713		FALSE	FALSE	FALSE
Anogam_AGAP000704	-0.259701510557458	0.415629864250432	-0.624838426915778	0.532077107411068	0.843896601542978	Female vs Male Oenocytes	Female Oenocytes	381.171	Male Oenocytes	463.717	cell cycle control protein 50A	FALSE	FALSE	FALSE
Anogam_AGAP000705	1.12298914075481	0.361377278533326	3.10752559018802	0.00188660651091522	0.0321576345981128	Female vs Male Oenocytes	Female Oenocytes	524.234	Male Oenocytes	245.995	protein DJ-1	FALSE	FALSE	FALSE
Anogam_AGAP000706	NA	NA	NA	NA	NA	Female vs Male Oenocytes	Female Oenocytes	0	Male Oenocytes	0		FALSE	FALSE	FALSE
Anogam_AGAP000707	-0.29077567475217	0.362730919880046	-0.801629138338494	0.422767517181263	0.78173495073192	Female vs Male Oenocytes	Female Oenocytes	126.513	Male Oenocytes	159.256		FALSE	FALSE	FALSE
Anogam_AGAP000708	-0.163439652118103	0.36982551998805	-0.441937192769672	0.658534655831893	0.901275125511944	Female vs Male Oenocytes	Female Oenocytes	393.228	Male Oenocytes	449.382	phosphorylase kinase alpha-beta subunit	FALSE	FALSE	FALSE
Anogam_AGAP000711	0.974027503631467	0.503430336649119	1.93478110618976	0.0530171625724044	0.274835785194492	Female vs Male Oenocytes	Female Oenocytes	469.724	Male Oenocytes	244.809		FALSE	FALSE	FALSE
Anogam_AGAP000713	-0.0375775218885382	0.268263285087772	-0.140077021260078	0.888599135950594	0.973742127450481	Female vs Male Oenocytes	Female Oenocytes	568.956	Male Oenocytes	602.125		FALSE	FALSE	FALSE
Anogam_AGAP000714	-3.90592758638589	3.94583981029046	-0.989884986258062	0.322230338719669	NA	Female vs Male Oenocytes	Female Oenocytes	0	Male Oenocytes	3.04095	IR7n ionotropic receptor IR7n	FALSE	FALSE	FALSE
Anogam_AGAP000715	0.429763441158907	1.34732525782894	0.318975272423394	0.749745263858683	0.935557198825515	Female vs Male Oenocytes	Female Oenocytes	9.80915	Male Oenocytes	7.35078	carbonic anhydrase-related protein 10	FALSE	FALSE	FALSE
Anogam_AGAP000717	-0.236082717345268	0.566230968377974	-0.416937134366831	0.676724390950777	0.908489103207798	Female vs Male Oenocytes	Female Oenocytes	607.115	Male Oenocytes	727.709		FALSE	FALSE	FALSE
Anogam_AGAP000718	1.21254212380219	0.567633842648012	2.13613430472307	0.0326684683182393	0.205587095613112	Female vs Male Oenocytes	Female Oenocytes	49.4926	Male Oenocytes	22.2738		FALSE	FALSE	FALSE
Anogam_AGAP000719	0.725084588789606	0.331153875934303	2.18956998991446	0.0285554374479298	0.19094574452699	Female vs Male Oenocytes	Female Oenocytes	2669.24	Male Oenocytes	1669.13	Ahcy13 Adenosylhomocysteinase	FALSE	FALSE	FALSE
Anogam_AGAP000720	0.351391823196248	0.312279820161129	1.1252466554353	0.260484527722382	0.63978229130439	Female vs Male Oenocytes	Female Oenocytes	510.776	Male Oenocytes	412.122	neuronal cell adhesion molecule	FALSE	FALSE	FALSE
Anogam_AGAP000721	-0.213558188058604	0.345016192801816	-0.618980188507489	0.535929410299941	0.844225225789751	Female vs Male Oenocytes	Female Oenocytes	1769	Male Oenocytes	2118.04	V-type H+-transporting ATPase subunit AC39	FALSE	FALSE	FALSE
Anogam_AGAP000723	-0.419099868723131	0.342174733501627	-1.22481243554805	0.22064589844962	0.597629135646349	Female vs Male Oenocytes	Female Oenocytes	99.604	Male Oenocytes	136.222	cytoplasmic dynein 1 light intermediate chain 2	FALSE	FALSE	FALSE
Anogam_AGAP000724	-0.353600692828569	1.08254269493745	-0.326639027247789	0.743940921750729	0.932997636151765	Female vs Male Oenocytes	Female Oenocytes	21.2004	Male Oenocytes	27.918		FALSE	FALSE	FALSE
Anogam_AGAP000725	0.0944911594906016	0.392412493149339	0.240795492345963	0.809713623433556	0.954752422622317	Female vs Male Oenocytes	Female Oenocytes	168.652	Male Oenocytes	162.765	aryl hydrocarbon receptor interacting protein	FALSE	FALSE	FALSE
Anogam_AGAP000726	-0.359087823947524	0.738946120135353	-0.485945881794129	0.627005536653412	0.887731183201113	Female vs Male Oenocytes	Female Oenocytes	70.8604	Male Oenocytes	91.2486		FALSE	FALSE	FALSE
Anogam_AGAP000727	0.544406554713916	0.379169303320137	1.43578752274223	0.151062811311616	0.489870990410136	Female vs Male Oenocytes	Female Oenocytes	95.061	Male Oenocytes	66.8288	adenylate cyclase 1	FALSE	FALSE	FALSE
Anogam_AGAP000728	0.413606056198174	0.480778483518667	0.860284040107455	0.389632488354517	0.75637165232651	Female vs Male Oenocytes	Female Oenocytes	89.6664	Male Oenocytes	68.7896	wengen	FALSE	FALSE	FALSE
Anogam_AGAP000731	1.37697031255417	1.92107719708437	0.716769901097159	0.47351608654958	NA	Female vs Male Oenocytes	Female Oenocytes	9.13689	Male Oenocytes	3.62448		FALSE	FALSE	FALSE
Anogam_AGAP000732	1.43191149014538	3.65887666107293	0.391352762824612	0.69553650332394	NA	Female vs Male Oenocytes	Female Oenocytes	5.6867	Male Oenocytes	2.05322	Synaptic vesicle protein	FALSE	FALSE	FALSE
Anogam_AGAP000733	-0.0484191355066631	0.358716789937937	-0.134978726574355	0.892628694122673	0.975345172489243	Female vs Male Oenocytes	Female Oenocytes	663.449	Male Oenocytes	703.245	UV excision repair protein RAD23	FALSE	FALSE	FALSE
Anogam_AGAP000734	-0.616484145201441	0.856993850007761	-0.719356556871276	0.471921256870294	0.812979636010177	Female vs Male Oenocytes	Female Oenocytes	12.9476	Male Oenocytes	20.1626		FALSE	FALSE	FALSE
Anogam_AGAP000735	0.983261081092406	0.366342905536759	2.6839910538236	0.007274905290022	0.0789226399053986	Female vs Male Oenocytes	Female Oenocytes	697.54	Male Oenocytes	360.561	histidyl-tRNA synthetase	FALSE	FALSE	FALSE
Anogam_AGAP000736	-0.133108883897982	0.925148379434029	-0.143878416540504	0.885596479442769	0.972779552548534	Female vs Male Oenocytes	Female Oenocytes	10.4401	Male Oenocytes	11.8754		FALSE	FALSE	FALSE
Anogam_AGAP000737	0.947828513512524	0.578007947141163	1.63981917238422	0.101042770597549	0.396533449132535	Female vs Male Oenocytes	Female Oenocytes	90.5034	Male Oenocytes	47.7451	protein SPT2	FALSE	FALSE	FALSE
Anogam_AGAP000738	0.777784253962582	1.81338427432516	0.428913090829592	0.667986473122057	NA	Female vs Male Oenocytes	Female Oenocytes	3.41508	Male Oenocytes	1.96595	Suppressor of defective silencing 3 homolog	FALSE	FALSE	FALSE
Anogam_AGAP000739	0.903960928055465	0.38641197593783	2.33937088999774	0.0193162467413596	0.149576232333972	Female vs Male Oenocytes	Female Oenocytes	9390.54	Male Oenocytes	5127.52	RpS10 40S ribosomal protein S10	FALSE	FALSE	FALSE
Anogam_AGAP000740	0.281563579211875	0.47179277370953	0.596795022946296	0.550644241272672	0.849559439964252	Female vs Male Oenocytes	Female Oenocytes	64.4378	Male Oenocytes	54.9696	GDP-D-glucose phosphorylase C15orf58 homolog	FALSE	FALSE	FALSE
Anogam_AGAP000741	0.30754225182982	1.55852599337986	0.197328920490364	0.843570148982434	NA	Female vs Male Oenocytes	Female Oenocytes	5.34282	Male Oenocytes	4.54512		FALSE	FALSE	FALSE
Anogam_AGAP000743	NA	NA	NA	NA	NA	Female vs Male Oenocytes	Female Oenocytes	0	Male Oenocytes	0		FALSE	FALSE	FALSE
Anogam_AGAP000744	NA	NA	NA	NA	NA	Female vs Male Oenocytes	Female Oenocytes	0	Male Oenocytes	0		FALSE	FALSE	FALSE
Anogam_AGAP000745	0.765060841485373	2.44546965647177	0.312848225068216	0.754395974739067	NA	Female vs Male Oenocytes	Female Oenocytes	3.91793	Male Oenocytes	2.3891		FALSE	FALSE	FALSE
Anogam_AGAP000747	0.0569658293671746	0.537406954356015	0.10600128804704	0.915581330231922	0.98158607020878	Female vs Male Oenocytes	Female Oenocytes	336.044	Male Oenocytes	327.882	mitogen-activated protein kinase kinase kinase 5	FALSE	FALSE	FALSE
Anogam_AGAP000748	1.97688071550753	1.28189672156417	1.54215287569761	0.123036448418253	0.43998235706957	Female vs Male Oenocytes	Female Oenocytes	25.5337	Male Oenocytes	6.85839	Muscular protein 20	FALSE	FALSE	FALSE
Anogam_AGAP000749	7.64157158676309	1.85815758743986	4.1124453805296	3.91490111007542e-05	0.00148649379463162	Female vs Male Oenocytes	Female Oenocytes	51.1271	Male Oenocytes	0	Muscular protein 20	FALSE	FALSE	FALSE
Anogam_AGAP000750	NA	NA	NA	NA	NA	Female vs Male Oenocytes	Female Oenocytes	0	Male Oenocytes	0		FALSE	FALSE	FALSE
Anogam_AGAP000751	0.60125044474753	0.652363658047015	0.921649201838583	0.356711585402396	0.729644969129388	Female vs Male Oenocytes	Female Oenocytes	55.9781	Male Oenocytes	37.9231	mitotic spindle assembly checkpoint protein MAD2	FALSE	FALSE	FALSE
Anogam_AGAP000752	0.703537168492624	0.353402981733514	1.99075051670937	0.0465083219432518	0.252409964850416	Female vs Male Oenocytes	Female Oenocytes	793.053	Male Oenocytes	500.882	acyl-CoA-binding domain-containing protein 6	FALSE	FALSE	FALSE
Anogam_AGAP000754	0.450423468662505	0.356262537376384	1.26430208457939	0.206121621675158	0.577821934481105	Female vs Male Oenocytes	Female Oenocytes	172.416	Male Oenocytes	129.04		FALSE	FALSE	FALSE
Anogam_AGAP000755	-1.03360377950313	1.34356504653889	-0.769299396531456	0.441715595397879	0.794051605370932	Female vs Male Oenocytes	Female Oenocytes	36.981	Male Oenocytes	77.4335		FALSE	FALSE	FALSE
Anogam_AGAP000756	0.505321798660533	0.515527378121626	0.980203613049072	0.326985621417233	0.705257669254295	Female vs Male Oenocytes	Female Oenocytes	528.134	Male Oenocytes	376.239	carboxypeptidase M	FALSE	FALSE	FALSE
Anogam_AGAP000757	0.84758895997113	0.521501750961036	1.62528497442084	0.104101851526104	0.400761172598961	Female vs Male Oenocytes	Female Oenocytes	288.136	Male Oenocytes	162.363	peptide-O-fucosyltransferase	FALSE	FALSE	FALSE
Anogam_AGAP000758	0.153573471145782	0.559549811411518	0.274458981155544	0.783731921993052	0.947403661631018	Female vs Male Oenocytes	Female Oenocytes	30.8759	Male Oenocytes	28.7087		FALSE	FALSE	FALSE
Anogam_AGAP000759	0.646475242199531	0.292867930905739	2.20739512243696	0.0272864668471464	0.184959430908234	Female vs Male Oenocytes	Female Oenocytes	522.115	Male Oenocytes	343.199	mRpL32 39S ribosomal protein L322C mitochondrial	FALSE	FALSE	FALSE
Anogam_AGAP000760	0.387879420508338	0.436759940404787	0.888083783848979	0.374495684787847	0.745621766638411	Female vs Male Oenocytes	Female Oenocytes	283.299	Male Oenocytes	223.06	alkylated DNA repair protein alkB homolog 7	FALSE	FALSE	FALSE
Anogam_AGAP000761	0.275336258926917	0.587725065869583	0.46847799237478	0.639442805507716	0.89402455773761	Female vs Male Oenocytes	Female Oenocytes	390.246	Male Oenocytes	337.331	GSTT1 glutathione S-transferase theta class 1	FALSE	FALSE	FALSE
Anogam_AGAP000762	0.212279084864403	0.570728537356206	0.371944052154368	0.709934505415194	0.9210956302468	Female vs Male Oenocytes	Female Oenocytes	32.7952	Male Oenocytes	29.4037		FALSE	FALSE	FALSE
Anogam_AGAP000763	-0.40596356622127	0.328434312181298	-1.23605710842165	0.216437336602842	0.591583759675133	Female vs Male Oenocytes	Female Oenocytes	232.588	Male Oenocytes	315.312	activin receptor type-22C invertebrate	FALSE	FALSE	FALSE
Anogam_AGAP000765	-0.289052804489275	0.980869880676857	-0.294690264410822	0.768230500969268	0.940260013296801	Female vs Male Oenocytes	Female Oenocytes	35.7363	Male Oenocytes	43.6341		FALSE	FALSE	FALSE
Anogam_AGAP000767	0.585676769916549	0.53273943934079	1.09936814635174	0.271607518954887	0.650783638541307	Female vs Male Oenocytes	Female Oenocytes	242.846	Male Oenocytes	167.612	membrane-associated progesterone receptor component 2	FALSE	FALSE	FALSE
Anogam_AGAP000768	-1.44518053357845	0.555030515656334	-2.60378572495153	0.00922003799844274	0.0937293772948585	Female vs Male Oenocytes	Female Oenocytes	116.894	Male Oenocytes	330.668	septin 4	FALSE	FALSE	FALSE
Anogam_AGAP000769	0.667633726956274	0.304893817479529	2.18972536890192	0.0285441600855836	0.19094574452699	Female vs Male Oenocytes	Female Oenocytes	813.211	Male Oenocytes	523.348		FALSE	FALSE	FALSE
Anogam_AGAP000770	-0.62183658822682	0.399333696971203	-1.55718536387793	0.119426482287781	0.433256286545617	Female vs Male Oenocytes	Female Oenocytes	1681.78	Male Oenocytes	2683.93	vacuole morphology and inheritance protein 14	FALSE	FALSE	FALSE
Anogam_AGAP000771	0.084504002856178	0.384344658423849	0.219865167900911	0.825976164513094	0.958177547889335	Female vs Male Oenocytes	Female Oenocytes	340.179	Male Oenocytes	331.4	Vacuolar-sorting protein SNF8	FALSE	FALSE	FALSE
Anogam_AGAP000772	6.94055777899985	2.0169593972335	3.44109940364673	0.000579355650221421	0.013248366509333	Female vs Male Oenocytes	Female Oenocytes	30.1043	Male Oenocytes	0		FALSE	FALSE	FALSE
Anogam_AGAP000773	3.36603346189026	1.62400419398067	2.07267535044945	0.0382025032824898	0.225589467812369	Female vs Male Oenocytes	Female Oenocytes	15.3675	Male Oenocytes	1.44082	single-minded	FALSE	FALSE	FALSE
Anogam_AGAP000774	0.0615964799737042	0.382408070118437	0.161075261708329	0.872034124103244	0.969469799138735	Female vs Male Oenocytes	Female Oenocytes	115.161	Male Oenocytes	112.656	PH and SEC7 domain-containing protein	FALSE	FALSE	FALSE
Anogam_AGAP000776	0.287763546303343	0.224724175915322	1.2805188633188	0.200362714938194	0.569045768130355	Female vs Male Oenocytes	Female Oenocytes	414.256	Male Oenocytes	349.508	myosin VI	FALSE	FALSE	FALSE
Anogam_AGAP000777	1.61697656942769	2.84432881446548	0.568491435028252	0.569701319858324	NA	Female vs Male Oenocytes	Female Oenocytes	1.55942	Male Oenocytes	0.530586		FALSE	FALSE	FALSE
Anogam_AGAP000778	1.09819369617171	0.327956848648528	3.34859205013475	0.000812232944406479	0.0171123420118636	Female vs Male Oenocytes	Female Oenocytes	230.656	Male Oenocytes	111.468		FALSE	FALSE	FALSE
Anogam_AGAP000779	0.307662222990091	0.522404590037304	0.588934762169914	0.555905037403744	0.851389294582764	Female vs Male Oenocytes	Female Oenocytes	1426.75	Male Oenocytes	1165.09	zinc finger homeobox protein 1-2	FALSE	FALSE	FALSE
Anogam_AGAP000780	-0.232966363330311	0.381189195721989	-0.611156784989833	0.541095789693736	0.84586533317695	Female vs Male Oenocytes	Female Oenocytes	766.729	Male Oenocytes	935.956	Yippee-like 5	FALSE	FALSE	FALSE
Anogam_AGAP000781	-0.0807578480415958	0.282003757464332	-0.286371531953116	0.774593576282788	0.942794829507418	Female vs Male Oenocytes	Female Oenocytes	384.746	Male Oenocytes	420.609	mitochondrial import inner membrane translocase subunit Tim9	FALSE	FALSE	FALSE
Anogam_AGAP000782	0.503757177094735	0.637726783942655	0.789926328607884	0.429570794229168	0.785091793108573	Female vs Male Oenocytes	Female Oenocytes	78.2328	Male Oenocytes	57.7051		FALSE	FALSE	FALSE
Anogam_AGAP000783	-0.253323046311598	0.386189431265785	-0.655955408933123	0.511852815372663	0.83538319955609	Female vs Male Oenocytes	Female Oenocytes	91.4333	Male Oenocytes	112.031		FALSE	FALSE	FALSE
Anogam_AGAP000784	0.256484507133707	0.477859930330541	0.536735747975967	0.591450159355719	0.870242455408298	Female vs Male Oenocytes	Female Oenocytes	691.583	Male Oenocytes	586.933	abhydrolase domain containing 4	FALSE	FALSE	FALSE
Anogam_AGAP000785	0.614983814121069	2.86254816490597	0.214837892218058	0.829893708893227	NA	Female vs Male Oenocytes	Female Oenocytes	4.52371	Male Oenocytes	3.01537	Synaptic vesicle protein	FALSE	FALSE	FALSE
Anogam_AGAP000786	20.6204178175182	3.36653770641381	6.12511120200225	NA	NA	Female vs Male Oenocytes	Female Oenocytes	38.6102	Male Oenocytes	0		FALSE	FALSE	FALSE
Anogam_AGAP000787	0.366880099480805	0.464815349822464	0.789302891182347	0.42993499723673	0.785091793108573	Female vs Male Oenocytes	Female Oenocytes	341.331	Male Oenocytes	268.804	E3 ubiquitin-protein ligase NEDD4	FALSE	FALSE	FALSE
Anogam_AGAP000788	-2.89815075220494	3.98488665955349	-0.727285616833499	0.467051007273774	NA	Female vs Male Oenocytes	Female Oenocytes	0	Male Oenocytes	1.54796		FALSE	FALSE	FALSE
Anogam_AGAP000789	5.03242855756686	3.9189542793928	1.28412535559016	0.199098097532495	NA	Female vs Male Oenocytes	Female Oenocytes	7.8659	Male Oenocytes	0		FALSE	FALSE	FALSE
Anogam_AGAP000790	1.0336729267886	0.605854387039905	1.70614086305282	0.0879818560213549	0.367983299166999	Female vs Male Oenocytes	Female Oenocytes	9145.47	Male Oenocytes	4507.1		FALSE	FALSE	FALSE
Anogam_AGAP000791	-0.186479659751054	0.316244573523752	-0.589669121190622	0.555412501045608	0.851360039989641	Female vs Male Oenocytes	Female Oenocytes	440.82	Male Oenocytes	518.964	Tango10	FALSE	FALSE	FALSE
Anogam_AGAP000792	-1.44045142904384	0.697436102401148	-2.0653525449638	0.0388896552115879	0.227433529625213	Female vs Male Oenocytes	Female Oenocytes	229.313	Male Oenocytes	629.263	Adenosylhomocysteinase	FALSE	FALSE	FALSE
Anogam_AGAP000793	-0.0881723205206951	0.682839197710875	-0.129126038482092	0.897257918753758	0.977405623887367	Female vs Male Oenocytes	Female Oenocytes	21.2187	Male Oenocytes	23.0798		FALSE	FALSE	FALSE
Anogam_AGAP000794	-0.100410997318261	0.281118571553185	-0.3571837917484	0.720954218981881	0.924798957816667	Female vs Male Oenocytes	Female Oenocytes	1712.78	Male Oenocytes	1892.59	NADH dehydrogenase (ubiquinone) Fe-S protein 2	FALSE	FALSE	FALSE
Anogam_AGAP000795	0.515313061971588	1.38821919083435	0.37120439291858	0.71048530142047	0.921358280521817	Female vs Male Oenocytes	Female Oenocytes	15.2372	Male Oenocytes	10.979		FALSE	FALSE	FALSE
Anogam_AGAP000797	0.11470565535385	1.00770452018149	0.113828660144535	0.909373618737875	0.98068948116539	Female vs Male Oenocytes	Female Oenocytes	17.7028	Male Oenocytes	17.0515	E3 ubiquitin-protein ligase HECW2	FALSE	FALSE	FALSE
Anogam_AGAP000798	NA	NA	NA	NA	NA	Female vs Male Oenocytes	Female Oenocytes	0	Male Oenocytes	0	GLURIIc ionotropic receptor GLURIIc	FALSE	FALSE	FALSE
Anogam_AGAP000801	-1.42660807620554	0.917990559706458	-1.55405527989495	0.120171231138846	0.43476893328258	Female vs Male Oenocytes	Female Oenocytes	49.6604	Male Oenocytes	137.488	GLURIIb ionotropic receptor GLURIIb	FALSE	FALSE	FALSE
Anogam_AGAP000803	-0.45685218609083	0.799013844847927	-0.571770050089409	0.567477770100162	0.857768677454942	Female vs Male Oenocytes	Female Oenocytes	43.0593	Male Oenocytes	59.4495	GLURIIa ionotropic receptor GLURIIa	FALSE	FALSE	FALSE
Anogam_AGAP000804	0.82542755325369	0.183389724353656	4.50094767393783	6.76511600897709e-06	0.000360428379619638	Female vs Male Oenocytes	Female Oenocytes	4724.57	Male Oenocytes	2739.39	GPXH2 glutathione peroxidase 2	FALSE	FALSE	FALSE
Anogam_AGAP000805	0.261663263299395	2.5781893294343	0.101491096992791	0.919160624637774	0.982864376472303	Female vs Male Oenocytes	Female Oenocytes	9.83927	Male Oenocytes	8.21624	BTB-POZ domain-containing protein KCTD16	FALSE	FALSE	FALSE
Anogam_AGAP000806	0.997075724099342	0.704888113329449	1.41451629733091	0.157210365693619	0.501968208753771	Female vs Male Oenocytes	Female Oenocytes	849.776	Male Oenocytes	428.575	Angiopoietin-like 1	FALSE	FALSE	FALSE
Anogam_AGAP000807	0.293989367081418	0.387617424520814	0.758452403023052	0.448180196802667	0.798193793547014	Female vs Male Oenocytes	Female Oenocytes	268.279	Male Oenocytes	224.527	helix-loop-helix transcription factor	FALSE	FALSE	FALSE
Anogam_AGAP000808	0.77986216660033	0.705230962850451	1.10582519441323	0.268802187857564	0.648028247467477	Female vs Male Oenocytes	Female Oenocytes	2220.09	Male Oenocytes	1292.22	DNA damage-regulated autophagy modulator protein 2	FALSE	FALSE	FALSE
Anogam_AGAP000809	-0.872146112960305	0.533117604359884	-1.6359356844115	0.101853048647516	0.397742667187062	Female vs Male Oenocytes	Female Oenocytes	214.915	Male Oenocytes	409.443	Proteasome 26S non-ATPase subunit 10	FALSE	FALSE	FALSE
Anogam_AGAP000810	0.728402633608666	0.431431585200894	1.6883386812523	0.0913462339503976	0.375547437108279	Female vs Male Oenocytes	Female Oenocytes	142.727	Male Oenocytes	87.892		FALSE	FALSE	FALSE
Anogam_AGAP000812	0.422896352645136	0.357279253500852	1.18365773691398	0.236548575191687	0.613836531739866	Female vs Male Oenocytes	Female Oenocytes	1240.77	Male Oenocytes	945.486	calcium binding protein	FALSE	FALSE	FALSE
Anogam_AGAP000813	-0.304595938846862	0.478634249574493	-0.636385589033063	0.524525131407517	0.841356831211049	Female vs Male Oenocytes	Female Oenocytes	229.749	Male Oenocytes	295.166	Frataxin homolog2C mitochondrial	FALSE	FALSE	FALSE
Anogam_AGAP000814	-0.326297668176047	0.525278469692299	-0.621189877375305	0.534474698915234	0.844040159951508	Female vs Male Oenocytes	Female Oenocytes	128.575	Male Oenocytes	163.252		FALSE	FALSE	FALSE
Anogam_AGAP000815	0.0102536363911921	0.416958829810178	0.0245914839982166	0.980380812032023	0.995960690890788	Female vs Male Oenocytes	Female Oenocytes	2142.15	Male Oenocytes	2168.66	INTB integrin beta subunit	FALSE	FALSE	FALSE
Anogam_AGAP000816	NA	NA	NA	NA	NA	Female vs Male Oenocytes	Female Oenocytes	0	Male Oenocytes	0		FALSE	FALSE	FALSE
Anogam_AGAP000817	-2.89815075220494	3.98488665955349	-0.727285616833498	0.467051007273774	NA	Female vs Male Oenocytes	Female Oenocytes	0	Male Oenocytes	1.70998		FALSE	FALSE	FALSE
Anogam_AGAP000818	-2.47735901522452	1.13612436803711	-2.180535058415	0.0292178230320663	0.193363282594616	Female vs Male Oenocytes	Female Oenocytes	15.7113	Male Oenocytes	91.5054	CYP9K1 cytochrome P450	FALSE	FALSE	FALSE
Anogam_AGAP000819	NA	NA	NA	NA	NA	Female vs Male Oenocytes	Female Oenocytes	0	Male Oenocytes	0	nuclear receptor subfamily 2 group E member (Tailless)	FALSE	FALSE	FALSE
Anogam_AGAP000820	-1.27696630808077	3.02905595619414	-0.421572373223904	0.673337174879026	NA	Female vs Male Oenocytes	Female Oenocytes	1.57862	Male Oenocytes	3.83997	CPR125 cuticular protein RR-2 family 125	FALSE	FALSE	FALSE
Anogam_AGAP000821	-4.03208657243079	3.94258524653276	-1.0227011770961	0.306449154688868	NA	Female vs Male Oenocytes	Female Oenocytes	0	Male Oenocytes	3.5813		FALSE	FALSE	FALSE
Anogam_AGAP000822	-0.715008404689713	1.02561235126468	-0.697152685230474	0.485707245744286	0.822158832287362	Female vs Male Oenocytes	Female Oenocytes	11.3514	Male Oenocytes	19.1955		FALSE	FALSE	FALSE
Anogam_AGAP000823	1.29320642419289	0.592927798591229	2.18105210662325	0.0291795626679557	0.193363282594616	Female vs Male Oenocytes	Female Oenocytes	767.615	Male Oenocytes	316.725	CD81 antigen	FALSE	FALSE	FALSE
Anogam_AGAP000824	0.530033101911165	0.436207242440515	1.21509468514486	0.224329980446154	0.599669243624575	Female vs Male Oenocytes	Female Oenocytes	420.7	Male Oenocytes	297.654	bone morphogenetic protein 5	FALSE	FALSE	FALSE
Anogam_AGAP000825	0.715675150910792	0.736695849419912	0.971466245499182	0.331316154029154	0.707916616564885	Female vs Male Oenocytes	Female Oenocytes	76.3356	Male Oenocytes	46.9915		FALSE	FALSE	FALSE
Anogam_AGAP000826	0.972857211149872	0.668175622404106	1.45599027939618	0.145395306798471	0.47988900235413	Female vs Male Oenocytes	Female Oenocytes	352.594	Male Oenocytes	181.346	cap-specific mRNA (nucleoside-2-O-)-methyltransferase 1	FALSE	FALSE	FALSE
Anogam_AGAP000829	-0.0588899128722705	0.50476925982374	-0.116666995317493	0.907123945543271	0.980094631933418	Female vs Male Oenocytes	Female Oenocytes	145.436	Male Oenocytes	154.853	calpain-15	FALSE	FALSE	FALSE
Anogam_AGAP000830	-0.0933409974750718	0.517938055761066	-0.180216526738734	0.856982584388311	0.965849460486815	Female vs Male Oenocytes	Female Oenocytes	213.729	Male Oenocytes	232.409	CASPS7 short caspase 7	FALSE	FALSE	FALSE
Anogam_AGAP000831	0.536168450383037	0.341537637442298	1.56986636787175	0.116446203392433	0.426550239640531	Female vs Male Oenocytes	Female Oenocytes	300.917	Male Oenocytes	213.796	DnaJ homolog subfamily C member 25	FALSE	FALSE	FALSE
Anogam_AGAP000832	-0.0288222391549358	0.195614513788433	-0.147342027934127	0.882862060967942	0.972019464982893	Female vs Male Oenocytes	Female Oenocytes	2162.81	Male Oenocytes	2268.52	Derlin-2-3	FALSE	FALSE	FALSE
Anogam_AGAP000833	1.0871717653589	0.78079511908061	1.39239057569808	0.163804156756685	0.514784156626322	Female vs Male Oenocytes	Female Oenocytes	232.604	Male Oenocytes	113.44	MIP myoinhibitory-like peptide	FALSE	FALSE	FALSE
Anogam_AGAP000834	0.557130309737768	1.29947671325844	0.428734354416219	0.66811655654028	0.904495868562494	Female vs Male Oenocytes	Female Oenocytes	18.9981	Male Oenocytes	13.2132		FALSE	FALSE	FALSE
Anogam_AGAP000835	6.50824749193928	3.50979405959149	1.85431036164463	0.0636947705737041	0.302743425644647	Female vs Male Oenocytes	Female Oenocytes	253.846	Male Oenocytes	2.89415		FALSE	FALSE	FALSE
Anogam_AGAP000840	0.304724461705112	0.804986121061376	0.378546230465853	0.705024857308061	0.918843871409686	Female vs Male Oenocytes	Female Oenocytes	12.3268	Male Oenocytes	10.2303	amiloride-sensitive sodium channel2C other	FALSE	FALSE	FALSE
Anogam_AGAP000841	-0.0393011034429201	0.326121664386127	-0.120510557055135	0.904078717272564	0.979369865713125	Female vs Male Oenocytes	Female Oenocytes	393.977	Male Oenocytes	413.096	Ras-related protein Rab-40	FALSE	FALSE	FALSE
Anogam_AGAP000842	0.0585454423975027	0.258116232307745	0.226818134892425	0.820565161580555	0.957057454177612	Female vs Male Oenocytes	Female Oenocytes	416.782	Male Oenocytes	411.943	NADH dehydrogenase (ubiquinone) 1 alpha subcomplex2C assembly factor 1	FALSE	FALSE	FALSE
Anogam_AGAP000843	0.331344697486635	0.51077326335199	0.648711906555483	0.516524606953252	0.837233896202021	Female vs Male Oenocytes	Female Oenocytes	101.287	Male Oenocytes	82.7649	cardiolipin synthase	FALSE	FALSE	FALSE
Anogam_AGAP000844	0.758193436107639	0.527366739296744	1.43769672907076	0.150520121590462	0.488890123620984	Female vs Male Oenocytes	Female Oenocytes	57.003	Male Oenocytes	34.2474	Progestin and adipoQ receptor family member 4	FALSE	FALSE	FALSE
Anogam_AGAP000847	0.343033104064763	0.432019439981076	0.794022380288693	0.427182402547809	0.784680829969477	Female vs Male Oenocytes	Female Oenocytes	925.511	Male Oenocytes	739.868	CDC-like kinase	FALSE	FALSE	FALSE
Anogam_AGAP000848	0.660795497586448	0.688051017804739	0.960387355714914	0.33686029943428	0.712006956542772	Female vs Male Oenocytes	Female Oenocytes	110.932	Male Oenocytes	70.8801		FALSE	FALSE	FALSE
Anogam_AGAP000849	1.070152565696	0.275849271167893	3.8794830276882	0.000104678704451223	0.00320846535089049	Female vs Male Oenocytes	Female Oenocytes	582.598	Male Oenocytes	286.167	NADH dehydrogenase (ubiquinone) 1 beta subcomplex 1	FALSE	FALSE	FALSE
Anogam_AGAP000850	0.181849657195943	0.3962980669322	0.458870916539328	0.64632686500948	0.896992814788647	Female vs Male Oenocytes	Female Oenocytes	167.336	Male Oenocytes	151.575		FALSE	FALSE	FALSE
Anogam_AGAP000851	0.0129707045888029	0.276260410181005	0.0469510074943586	0.962552274787471	0.992620513796175	Female vs Male Oenocytes	Female Oenocytes	2116.11	Male Oenocytes	2168.38	cytochrome c oxidase subunit 6a2C mitochrondrial	FALSE	FALSE	FALSE
Anogam_AGAP000852	0.630669311633993	0.231532881033423	2.72388659795994	0.00645186556515987	0.0718317111499637	Female vs Male Oenocytes	Female Oenocytes	1382.35	Male Oenocytes	921.538	Small ubiquitin-related modifier	FALSE	FALSE	FALSE
Anogam_AGAP000853	1.68295308683192	2.10946944697761	0.797808704574131	0.424981509175994	NA	Female vs Male Oenocytes	Female Oenocytes	9.72716	Male Oenocytes	3.04839	gamma-glutamyltranspeptidase	FALSE	FALSE	FALSE
Anogam_AGAP000854	0.461411943175097	2.23780870787263	0.206189180313691	0.836643139126195	NA	Female vs Male Oenocytes	Female Oenocytes	1.78804	Male Oenocytes	1.35343		FALSE	FALSE	FALSE
Anogam_AGAP000855	0.341227063410935	0.316989030065396	1.07646331906356	0.281720097259943	0.663607340212311	Female vs Male Oenocytes	Female Oenocytes	866.503	Male Oenocytes	702.931		FALSE	FALSE	FALSE
Anogam_AGAP000856	0.724267327565232	0.35531253814149	2.03839507424537	0.0415104385157251	0.235568625447186	Female vs Male Oenocytes	Female Oenocytes	287.53	Male Oenocytes	179.583	tRNA-dihydrouridine synthase 2	FALSE	FALSE	FALSE
Anogam_AGAP000857	0.516029952230114	0.399291623542586	1.29236358041224	0.196231262932271	0.563121690934391	Female vs Male Oenocytes	Female Oenocytes	457.98	Male Oenocytes	328.67	mRpL3 39S ribosomal protein L32C mitochondrial	FALSE	FALSE	FALSE
Anogam_AGAP000858	0.60730299349248	0.968409386485711	0.627113906543533	0.530584572001416	0.843827675082314	Female vs Male Oenocytes	Female Oenocytes	10.6005	Male Oenocytes	7.05945		FALSE	FALSE	FALSE
Anogam_AGAP000859	NA	NA	NA	NA	NA	Female vs Male Oenocytes	Female Oenocytes	0	Male Oenocytes	0		FALSE	FALSE	FALSE
Anogam_AGAP000860	0.468494616821997	0.799484912248333	0.585995569953264	0.557878491860224	0.85216925603357	Female vs Male Oenocytes	Female Oenocytes	32.2882	Male Oenocytes	23.6006	Protein tweety homolog	FALSE	FALSE	FALSE
Anogam_AGAP000861	0.0484502491967022	0.441819125632424	0.10966082359461	0.912678371215366	0.981496315869193	Female vs Male Oenocytes	Female Oenocytes	272.403	Male Oenocytes	269.353		FALSE	FALSE	FALSE
Anogam_AGAP000862	0.478671733668791	0.40789221006691	1.17352506827789	0.240585310152184	0.61762684106539	Female vs Male Oenocytes	Female Oenocytes	1942.3	Male Oenocytes	1419.54	alpha 12C3-glucosidase	FALSE	FALSE	FALSE
Anogam_AGAP000863	4.49154816157332	2.59981643339174	1.72764049949235	0.0840526971396146	NA	Female vs Male Oenocytes	Female Oenocytes	5.40489	Male Oenocytes	0	lachesin	FALSE	FALSE	FALSE
Anogam_AGAP000864	-0.237313923834581	0.463020413960439	-0.512534472950598	0.608277000178105	0.878304654080769	Female vs Male Oenocytes	Female Oenocytes	101.456	Male Oenocytes	121.69		FALSE	FALSE	FALSE
Anogam_AGAP000865	-0.382232384193066	0.305325119912385	-1.2518864622169	0.210611238407065	0.582227645213336	Female vs Male Oenocytes	Female Oenocytes	961.559	Male Oenocytes	1285.1		FALSE	FALSE	FALSE
Anogam_AGAP000866	0.521660951659704	0.466365393258871	1.11856702748555	0.263324896621064	0.642973946734381	Female vs Male Oenocytes	Female Oenocytes	119.272	Male Oenocytes	84.953		FALSE	FALSE	FALSE
Anogam_AGAP000867	0.349373416485191	0.492489405219595	0.709402908534468	0.478074483353726	0.817167544026268	Female vs Male Oenocytes	Female Oenocytes	82.7583	Male Oenocytes	66.655		FALSE	FALSE	FALSE
Anogam_AGAP000868	0.62062806307912	0.435914685275118	1.42373745148646	0.154522488039578	0.497301754580288	Female vs Male Oenocytes	Female Oenocytes	1720.94	Male Oenocytes	1136.69	beta-12C4-mannosyltransferase egghead protein	FALSE	FALSE	FALSE
Anogam_AGAP000869	-0.711904692010917	0.655443773374952	-1.08614151347451	0.277416388272473	0.658843412555027	Female vs Male Oenocytes	Female Oenocytes	209.872	Male Oenocytes	360.214	partitioning defective protein 3	FALSE	FALSE	FALSE
Anogam_AGAP000870	0.46347149385357	0.287381923010199	1.61273711651349	0.106801633087439	0.4063045874795	Female vs Male Oenocytes	Female Oenocytes	385.748	Male Oenocytes	286.105		FALSE	FALSE	FALSE
Anogam_AGAP000871	2.15899328191081	3.99526224051329	0.540388378018818	0.588929221057861	NA	Female vs Male Oenocytes	Female Oenocytes	1.15814	Male Oenocytes	0		FALSE	FALSE	FALSE
Anogam_AGAP000874	-0.954450766255851	1.38183273566407	-0.690713674399363	0.489745494224015	0.824981493251246	Female vs Male Oenocytes	Female Oenocytes	10.3332	Male Oenocytes	19.9572		FALSE	FALSE	FALSE
Anogam_AGAP000875	1.04315932971	1.38571138323002	0.752796969364897	0.451571928224219	0.800270492948803	Female vs Male Oenocytes	Female Oenocytes	40.7657	Male Oenocytes	20.5006		FALSE	FALSE	FALSE
Anogam_AGAP000876	0.697056687504461	2.51198168517716	0.277492742728855	0.781401777574676	NA	Female vs Male Oenocytes	Female Oenocytes	2.19952	Male Oenocytes	1.42099	achaete-scute complex protein	FALSE	FALSE	FALSE
Anogam_AGAP000877	-0.480779789178593	0.809854030191673	-0.593662278947731	0.552738017215698	0.849806333665228	Female vs Male Oenocytes	Female Oenocytes	93677.3	Male Oenocytes	137776	CYP4G17 cytochrome P450	FALSE	FALSE	FALSE
Anogam_AGAP000878	0.655447855054311	4.03816920685742	0.16231312297198	0.87105928107504	NA	Female vs Male Oenocytes	Female Oenocytes	0.729622	Male Oenocytes	0.347301	achaete-scute complex protein	FALSE	FALSE	FALSE
Anogam_AGAP000879	3.48638280118331	1.81980842769439	1.91579660151392	0.0553909904994819	0.281518754341417	Female vs Male Oenocytes	Female Oenocytes	64.73	Male Oenocytes	5.98138	yellow protein	FALSE	FALSE	FALSE
Anogam_AGAP000880	0.258591211284783	0.294144703300814	0.879129246193936	0.379331201936371	0.747641741410906	Female vs Male Oenocytes	Female Oenocytes	835.538	Male Oenocytes	714.943	suppressor of cytokine signaling2C invertebrate	FALSE	FALSE	FALSE
Anogam_AGAP000881	0.398876855160158	0.348228862165091	1.14544455815686	0.25202504938374	0.631773102412782	Female vs Male Oenocytes	Female Oenocytes	1439.79	Male Oenocytes	1129.88	aldehyde dehydrogenase family 7 member A1	FALSE	FALSE	FALSE
Anogam_AGAP000882	-0.771987884468101	0.73599766681656	-1.04889990726086	0.29422418822435	0.67463392054326	Female vs Male Oenocytes	Female Oenocytes	57.4036	Male Oenocytes	101.223	17-beta-hydroxysteroid dehydrogenase type 6 precursor	FALSE	FALSE	FALSE
Anogam_AGAP000883	0.752223053771747	0.25918693795096	2.90224136956344	0.00370502950691376	0.0512260601390685	Female vs Male Oenocytes	Female Oenocytes	2495.38	Male Oenocytes	1526.64	elongation factor 1-gamma	FALSE	FALSE	FALSE
Anogam_AGAP000884	-0.0997531845618193	0.513592190065027	-0.194226443648197	0.845998578076826	0.964460550763485	Female vs Male Oenocytes	Female Oenocytes	126.395	Male Oenocytes	138.412	ubiquitin carboxyl-terminal hydrolase 1	FALSE	FALSE	FALSE
Anogam_AGAP000885	0.485020473987501	0.771475661035952	0.628691867396318	0.529550803379878	0.843435432022794	Female vs Male Oenocytes	Female Oenocytes	63.5684	Male Oenocytes	46.0202	aminopeptidase N	FALSE	FALSE	FALSE
Anogam_AGAP000886	0.215968529713469	0.278860599002533	0.774467710698372	0.438654255660662	0.790883363855935	Female vs Male Oenocytes	Female Oenocytes	781.674	Male Oenocytes	688.407	Palmitoyltransferase	FALSE	FALSE	FALSE
Anogam_AGAP000887	0.414354559292334	0.517198388191446	0.801152069984712	0.423043614932372	0.78173495073192	Female vs Male Oenocytes	Female Oenocytes	191.695	Male Oenocytes	147.118	Xaa-Pro aminopeptidase	FALSE	FALSE	FALSE
Anogam_AGAP000888	0.280787522028506	0.377846285928273	0.743126325401564	0.457405202796235	0.803756750760575	Female vs Male Oenocytes	Female Oenocytes	485.658	Male Oenocytes	414.805	GSTT2 glutathione S-transferase theta class 2	FALSE	FALSE	FALSE
Anogam_AGAP000889	0.0845804275457623	0.453795015651498	0.186384655248655	0.85214312492657	0.964978216171848	Female vs Male Oenocytes	Female Oenocytes	3553.57	Male Oenocytes	3393.57	Coactosin-like protein	FALSE	FALSE	FALSE
Anogam_AGAP000890	0.198328022180663	0.482929704991077	0.410676792359103	0.681309546404438	0.909794033789489	Female vs Male Oenocytes	Female Oenocytes	317.265	Male Oenocytes	287.645	mRpS29 28S ribosomal protein S292C mitochondrial	FALSE	FALSE	FALSE
Anogam_AGAP000891	0.0080231542324623	0.358438812154623	0.0223836090300436	0.98214195517632	0.996360723191779	Female vs Male Oenocytes	Female Oenocytes	470.894	Male Oenocytes	483.91	phosphatidylinositide phosphatase SAC1	FALSE	FALSE	FALSE
Anogam_AGAP000892	NA	NA	NA	NA	NA	Female vs Male Oenocytes	Female Oenocytes	0	Male Oenocytes	0		FALSE	FALSE	FALSE
Anogam_AGAP000893	2.13896424934765	1.39940725264597	1.52847875077347	0.126393715428288	0.445971722676233	Female vs Male Oenocytes	Female Oenocytes	17.0528	Male Oenocytes	3.97984		FALSE	FALSE	FALSE
Anogam_AGAP000894	-0.515423474651227	0.402975757618098	-1.27904337893124	0.200881780635434	0.569724916317218	Female vs Male Oenocytes	Female Oenocytes	75.1341	Male Oenocytes	110.888		FALSE	FALSE	FALSE
Anogam_AGAP000896	1.01922568528238	0.539251076829229	1.89007630967633	0.0587477549941971	0.291258309604237	Female vs Male Oenocytes	Female Oenocytes	251.141	Male Oenocytes	129.136		FALSE	FALSE	FALSE
Anogam_AGAP000897	0.280028349740543	0.244697130415516	1.14438755070414	0.252462948831479	0.632462571961874	Female vs Male Oenocytes	Female Oenocytes	2431.73	Male Oenocytes	2051.11	coiled-coil-helix-coiled-coil-helix domain-containing protein 22C mitochondrial	FALSE	FALSE	FALSE
Anogam_AGAP000898	0.533018886944578	0.490211534700335	1.08732424517593	0.276893537274074	0.658410352047074	Female vs Male Oenocytes	Female Oenocytes	82.4108	Male Oenocytes	58.1391	slingshot	FALSE	FALSE	FALSE
Anogam_AGAP000899	-2.59984221144205	0.649913369175967	-4.00029039983962	6.32648002423773e-05	0.00216412758494896	Female vs Male Oenocytes	Female Oenocytes	37.5667	Male Oenocytes	238.217		FALSE	FALSE	FALSE
Anogam_AGAP000900	1.16842340547719	0.677187694629574	1.72540554818606	0.0844544121483116	0.360147459566725	Female vs Male Oenocytes	Female Oenocytes	1351.22	Male Oenocytes	601.378	protein-tyrosine sulfotransferase	FALSE	FALSE	FALSE
Anogam_AGAP000901	-0.23219991297318	0.241917242163244	-0.959832010719159	0.337139768854866	0.712006956542772	Female vs Male Oenocytes	Female Oenocytes	2345.38	Male Oenocytes	2824.37	alanine transaminase	FALSE	FALSE	FALSE
Anogam_AGAP000903	0.725927095611851	0.799373010277846	0.908120597366095	0.363814509246533	0.735580458194461	Female vs Male Oenocytes	Female Oenocytes	55.7457	Male Oenocytes	34.2368	deltex	FALSE	FALSE	FALSE
Anogam_AGAP000904	0.788574033098918	0.710107485429751	1.11049953602683	0.266783827933985	0.646036453823057	Female vs Male Oenocytes	Female Oenocytes	63.1956	Male Oenocytes	38.0365		FALSE	FALSE	FALSE
Anogam_AGAP000906	-0.874555231884409	0.887013476963444	-0.985954841270639	0.324155273470645	0.702483803648401	Female vs Male Oenocytes	Female Oenocytes	39.2695	Male Oenocytes	75.4476		FALSE	FALSE	FALSE
Anogam_AGAP000907	-0.660887380398759	2.6022012784332	-0.253972429372059	0.799516858058524	0.952534166121974	Female vs Male Oenocytes	Female Oenocytes	6.11525	Male Oenocytes	10.1281		FALSE	FALSE	FALSE
Anogam_AGAP000908	0.195316556574958	0.34714039604948	0.562644275335557	0.573677136612648	0.860024724766529	Female vs Male Oenocytes	Female Oenocytes	359.889	Male Oenocytes	323.667	dynactin 4	FALSE	FALSE	FALSE
Anogam_AGAP000909	-0.183145400654992	0.283751363233895	-0.645443244986371	0.518639986580302	0.838607121944345	Female vs Male Oenocytes	Female Oenocytes	1128.12	Male Oenocytes	1321.1	endoplasmic reticulum resident protein 44 precursor	FALSE	FALSE	FALSE
Anogam_AGAP000911	-0.394752520515463	0.364700647114562	-1.0824014808821	0.279074170556805	0.660432269671174	Female vs Male Oenocytes	Female Oenocytes	857.834	Male Oenocytes	1147.92		FALSE	FALSE	FALSE
Anogam_AGAP000912	0.0710137560988234	0.535007026409735	0.132734249445983	0.894403555372273	0.975922215255013	Female vs Male Oenocytes	Female Oenocytes	35.3825	Male Oenocytes	34.4628	Sorting nexin-25	FALSE	FALSE	FALSE
Anogam_AGAP000913	0.0959527676410996	0.355762127253346	0.269710461824312	0.787383011358188	0.947918558942801	Female vs Male Oenocytes	Female Oenocytes	1029.08	Male Oenocytes	982.316	G protein-coupled receptor 107	FALSE	FALSE	FALSE
Anogam_AGAP000915	1.52510463606506	1.43837074144163	1.06030009657768	0.289008095325691	NA	Female vs Male Oenocytes	Female Oenocytes	8.40237	Male Oenocytes	3.09152		FALSE	FALSE	FALSE
Anogam_AGAP000916	NA	NA	NA	NA	NA	Female vs Male Oenocytes	Female Oenocytes	0	Male Oenocytes	0		FALSE	FALSE	FALSE
Anogam_AGAP000917	NA	NA	NA	NA	NA	Female vs Male Oenocytes	Female Oenocytes	0	Male Oenocytes	0		FALSE	FALSE	FALSE
Anogam_AGAP000918	NA	NA	NA	NA	NA	Female vs Male Oenocytes	Female Oenocytes	0	Male Oenocytes	0		FALSE	FALSE	FALSE
Anogam_AGAP000919	NA	NA	NA	NA	NA	Female vs Male Oenocytes	Female Oenocytes	0	Male Oenocytes	0		FALSE	FALSE	FALSE
Anogam_AGAP000920	NA	NA	NA	NA	NA	Female vs Male Oenocytes	Female Oenocytes	0	Male Oenocytes	0		FALSE	FALSE	FALSE
Anogam_AGAP000921	NA	NA	NA	NA	NA	Female vs Male Oenocytes	Female Oenocytes	0	Male Oenocytes	0		FALSE	FALSE	FALSE
Anogam_AGAP000922	-3.02629453055432	2.73585640060211	-1.10615985908043	0.268657333624026	NA	Female vs Male Oenocytes	Female Oenocytes	0.702671	Male Oenocytes	5.9979		FALSE	FALSE	FALSE
Anogam_AGAP000923	-0.152434100748205	0.452172941612739	-0.337114600897007	0.736030511093268	0.930996586417858	Female vs Male Oenocytes	Female Oenocytes	342.983	Male Oenocytes	392.063	SWI-SNF-related matrix-associated actin-dependent regulator of chromatin	FALSE	FALSE	FALSE
Anogam_AGAP000924	0.777875242632908	0.424378309829098	1.83297596652894	0.0668061452573929	0.312992326951763	Female vs Male Oenocytes	Female Oenocytes	179.765	Male Oenocytes	107.441		FALSE	FALSE	FALSE
Anogam_AGAP000926	-0.423700207319857	0.465845141841271	-0.909530161987235	0.363070344083194	0.734827082112193	Female vs Male Oenocytes	Female Oenocytes	580.107	Male Oenocytes	809.549	inositol hexakisphosphate-diphosphoinositol-pentakisphosphate kinase	FALSE	FALSE	FALSE
Anogam_AGAP000927	-0.451188171652471	0.245007118949671	-1.8415308648446	0.0655438018309416	0.309500569573857	Female vs Male Oenocytes	Female Oenocytes	14065.2	Male Oenocytes	19778.2	myosin regulatory light chain2C invertebrate	FALSE	FALSE	FALSE
Anogam_AGAP000928	0.56695127465639	0.47960846325199	1.18211274007171	0.237160969940411	0.614396647177603	Female vs Male Oenocytes	Female Oenocytes	318.139	Male Oenocytes	222.03	peroxin-10	FALSE	FALSE	FALSE
Anogam_AGAP000929	5.85689031264302	2.76307130299468	2.11970292127286	0.0340311064926958	NA	Female vs Male Oenocytes	Female Oenocytes	14.1133	Male Oenocytes	0	CTLSE1 C-type lectin (CTL) - selectin like	FALSE	FALSE	FALSE
Anogam_AGAP000930	0.479660834014465	0.459524360670447	1.04382025212905	0.296568559874604	0.676806832313069	Female vs Male Oenocytes	Female Oenocytes	345.908	Male Oenocytes	252.28	coronin	FALSE	FALSE	FALSE
Anogam_AGAP000931	0.922118029700909	0.31408961350945	2.93584375299047	0.00332641824990579	0.0482188491610275	Female vs Male Oenocytes	Female Oenocytes	456.651	Male Oenocytes	246.665	UPF0729 protein AGAP000931	FALSE	FALSE	FALSE
Anogam_AGAP000932	-0.529987048564054	0.702660755080358	-0.754257363503165	0.450694698720753	0.800103851502722	Female vs Male Oenocytes	Female Oenocytes	151.125	Male Oenocytes	219.231	Rap guanine nucleotide exchange factor (GEF) 1	FALSE	FALSE	FALSE
Anogam_AGAP000933	0.496534421456503	0.353948595087516	1.40284331778102	0.160663566485454	0.509385840944347	Female vs Male Oenocytes	Female Oenocytes	228.283	Male Oenocytes	165.156	APG10 autophagy related gene	FALSE	FALSE	FALSE
Anogam_AGAP000934	0.739319168985816	0.837682912558345	0.882576399616272	0.377465184430121	0.747199371073525	Female vs Male Oenocytes	Female Oenocytes	27.7666	Male Oenocytes	16.8141		FALSE	FALSE	FALSE
Anogam_AGAP000935	0.112480711470299	0.371109073718989	0.303093401471158	0.761818682650365	0.938065312719263	Female vs Male Oenocytes	Female Oenocytes	1105.9	Male Oenocytes	1053.83	mitochondrial processing peptidase	FALSE	FALSE	FALSE
Anogam_AGAP000938	0.447067668413087	0.983175830434965	0.454717919800063	0.649312187231004	0.897988694925618	Female vs Male Oenocytes	Female Oenocytes	38.3871	Male Oenocytes	28.4993		FALSE	FALSE	FALSE
Anogam_AGAP000939	0.348322473511596	0.514893398068861	0.67649434779704	0.498726833448301	0.828912554826217	Female vs Male Oenocytes	Female Oenocytes	84.5442	Male Oenocytes	68.9599	platelet-activating factor acetylhydrolase IB subunit beta-gamma	FALSE	FALSE	FALSE
Anogam_AGAP000940	0.771749105318948	1.07712299539108	0.716491160824902	0.473688123522278	0.814231477189646	Female vs Male Oenocytes	Female Oenocytes	140.789	Male Oenocytes	81.7797	CTL7 C-type lectin (CTL)	FALSE	FALSE	FALSE
Anogam_AGAP000941	-0.0773245151073986	0.462938675483951	-0.167029715170296	0.867346668026731	0.966928099675724	Female vs Male Oenocytes	Female Oenocytes	1725.7	Male Oenocytes	1897.95		FALSE	FALSE	FALSE
Anogam_AGAP000942	0.483061015286423	0.280513377828456	1.72206052711623	0.0850585546169109	0.360949062461087	Female vs Male Oenocytes	Female Oenocytes	211.441	Male Oenocytes	155.764	Uncharacterized Nudix hydrolase NudL	FALSE	FALSE	FALSE
Anogam_AGAP000943	-0.242458940557721	0.296614267331972	-0.817421706442598	0.413687475191341	0.773856222495478	Female vs Male Oenocytes	Female Oenocytes	2955.48	Male Oenocytes	3607.29	chloride intracellular channel	FALSE	FALSE	FALSE
Anogam_AGAP000944	0.044834363372012	4.01821121473242	0.0111577916082735	0.991097555063749	NA	Female vs Male Oenocytes	Female Oenocytes	0.812711	Male Oenocytes	0.739748		FALSE	FALSE	FALSE
Anogam_AGAP000945	-1.23921628257257	0.86795326571418	-1.42774540003937	0.153365153489324	0.494657306468262	Female vs Male Oenocytes	Female Oenocytes	19.335	Male Oenocytes	46.5517	sn1-specific diacylglycerol lipase	FALSE	FALSE	FALSE
Anogam_AGAP000946	-0.557196343147209	0.676682503073307	-0.82342360060527	0.41026714667229	0.770562023534224	Female vs Male Oenocytes	Female Oenocytes	68.8359	Male Oenocytes	102.549	C-4 methylsterol oxidase	FALSE	FALSE	FALSE
Anogam_AGAP000947	0.627521413088098	0.371226757251812	1.69039919895223	0.0909516082158331	0.375427504744355	Female vs Male Oenocytes	Female Oenocytes	812.333	Male Oenocytes	546.07	GSTU1 glutathione S-transferase unclassified 1	FALSE	FALSE	FALSE
Anogam_AGAP000948	0.271753454022904	0.283297879398831	0.959249870135193	0.337432882737028	0.712093947476566	Female vs Male Oenocytes	Female Oenocytes	995.156	Male Oenocytes	842.636	Protein YIPF	FALSE	FALSE	FALSE
Anogam_AGAP000949	-0.194669105626961	0.282316301305731	-0.689542561752911	0.490481898873776	0.825255258422543	Female vs Male Oenocytes	Female Oenocytes	564.981	Male Oenocytes	666.225	transmembrane emp24 domain-containing protein 3 precursor	FALSE	FALSE	FALSE
Anogam_AGAP000950	0.696475316795694	0.272048941238616	2.56011037434919	0.0104638924060388	0.100366900373166	Female vs Male Oenocytes	Female Oenocytes	525.21	Male Oenocytes	333.571	mRpL9 39S ribosomal protein L92C mitochondrial	FALSE	FALSE	FALSE
Anogam_AGAP000951	-0.376225198119675	0.242456040883704	-1.55172540452451	0.120727941337682	0.435493630291475	Female vs Male Oenocytes	Female Oenocytes	551.226	Male Oenocytes	736.954		FALSE	FALSE	FALSE
Anogam_AGAP000952	1.06965742969443	0.298366800568703	3.58504172600841	0.000337024317561603	0.00839931576243555	Female vs Male Oenocytes	Female Oenocytes	5652.98	Male Oenocytes	2767.52	RpL37 60S ribosomal protein L37	FALSE	FALSE	FALSE
Anogam_AGAP000953	0.79429261317758	0.236483200027618	3.35876972691852	0.000782902759912398	0.0166038955471677	Female vs Male Oenocytes	Female Oenocytes	4127.77	Male Oenocytes	2447.88	RpL10-1 60S ribosomal protein L10-1	FALSE	FALSE	FALSE
Anogam_AGAP000954	0.154261122072315	0.314587594159955	0.490359839154622	0.623879290198794	0.886644829277462	Female vs Male Oenocytes	Female Oenocytes	726.656	Male Oenocytes	675.09	phosphoribosyl pyrophosphate synthetase-associated protein 2	FALSE	FALSE	FALSE
Anogam_AGAP000955	-1.65369739408966	1.05379785061064	-1.56927383476005	0.116584146353409	0.42674829974543	Female vs Male Oenocytes	Female Oenocytes	86.1036	Male Oenocytes	270.921		FALSE	FALSE	FALSE
Anogam_AGAP000957	-1.30934816536237	2.26353916474944	-0.578451738654722	0.562959171656842	NA	Female vs Male Oenocytes	Female Oenocytes	1.49384	Male Oenocytes	3.71226	Osi23 protein osiris 23	FALSE	FALSE	FALSE
Anogam_AGAP000958	0.224166526829404	0.325969417052049	0.687691897162273	0.491646823679775	0.825849798244535	Female vs Male Oenocytes	Female Oenocytes	533.626	Male Oenocytes	467.349	calcium-binding mitochondrial carrier protein Aralar1	FALSE	FALSE	FALSE
Anogam_AGAP000960	0.692084522655651	0.40302557799426	1.71722233139632	0.0859385567916046	0.363470803786936	Female vs Male Oenocytes	Female Oenocytes	169.237	Male Oenocytes	107.006	STAM-binding protein	FALSE	FALSE	FALSE
Anogam_AGAP000961	-0.469803574665656	0.381345280164118	-1.23196378479752	0.217962612611936	0.593520884650537	Female vs Male Oenocytes	Female Oenocytes	95.4078	Male Oenocytes	135.547		FALSE	FALSE	FALSE
Anogam_AGAP000962	0.929988718414231	2.285110320367	0.406977601967537	0.684024438792514	0.909828118944494	Female vs Male Oenocytes	Female Oenocytes	13.9973	Male Oenocytes	7.18048	alpha7 nicotinic acetylcholine receptor subunit alpha 7	FALSE	FALSE	FALSE
Anogam_AGAP000963	1.14559839189099	3.20767801795179	0.357142576492915	0.720985071992787	NA	Female vs Male Oenocytes	Female Oenocytes	2.31844	Male Oenocytes	1.07851		FALSE	FALSE	FALSE
Anogam_AGAP000964	0.0347646313906245	0.62306946477489	0.0557957552986242	0.955504516459189	0.99137241641324	Female vs Male Oenocytes	Female Oenocytes	6488.74	Male Oenocytes	6366.16		FALSE	FALSE	FALSE
Anogam_AGAP000965	0.124577975132344	1.05460533469958	0.118127579136353	0.905966571445902	0.979640302378329	Female vs Male Oenocytes	Female Oenocytes	16.3814	Male Oenocytes	15.0477	ELAV (embryonic lethal2C abnormal vision Drosophila)-like	FALSE	FALSE	FALSE
Anogam_AGAP000966	0.420676329114297	1.03187592042975	0.407681118228918	0.68350780152522	0.909794033789489	Female vs Male Oenocytes	Female Oenocytes	55.3305	Male Oenocytes	41.5021	beta1 nicotinic acetylcholine receptor beta 1	FALSE	FALSE	FALSE
Anogam_AGAP000967	0.526311644941712	0.278569836517506	1.88933465130794	0.0588470012329316	0.291258309604237	Female vs Male Oenocytes	Female Oenocytes	233.268	Male Oenocytes	166.422	estrogen receptor binding site associated antigen 9 variant 1	FALSE	FALSE	FALSE
Anogam_AGAP000968	-0.545282229237899	0.619426047560656	-0.880302388614846	0.378695518986897	0.747199371073525	Female vs Male Oenocytes	Female Oenocytes	50.049	Male Oenocytes	76.0184		FALSE	FALSE	FALSE
Anogam_AGAP000969	0.0196401152267447	0.380801122180766	0.0515757808545048	0.958866717727264	0.992237966420474	Female vs Male Oenocytes	Female Oenocytes	716.869	Male Oenocytes	718.919	tropomodulin	FALSE	FALSE	FALSE
Anogam_AGAP000970	1.14516708139902	0.938816489184429	1.21979864498743	0.222541215201348	0.59908567484876	Female vs Male Oenocytes	Female Oenocytes	19.6737	Male Oenocytes	9.02058	DnaJ homolog subfamily C	FALSE	FALSE	FALSE
Anogam_AGAP000971	1.30919757161446	0.644781690059414	2.03045091353915	0.0423107258872536	0.238270031338513	Female vs Male Oenocytes	Female Oenocytes	798.067	Male Oenocytes	324.452	prolyl 4-hydroxylase	FALSE	FALSE	FALSE
Anogam_AGAP000973	0.615925727043604	0.364709223574604	1.68881313449319	0.0912552459680549	0.375547437108279	Female vs Male Oenocytes	Female Oenocytes	308.091	Male Oenocytes	208.701	neutral ceramidase	FALSE	FALSE	FALSE
Anogam_AGAP000974	0.10362124101609	0.894378138243159	0.115858423395316	0.907764747048219	0.980094631933418	Female vs Male Oenocytes	Female Oenocytes	83.5933	Male Oenocytes	78.4967		FALSE	FALSE	FALSE
Anogam_AGAP000975	0.298988344604459	0.30519918119438	0.979649891046185	0.327258968728241	0.705317948882339	Female vs Male Oenocytes	Female Oenocytes	566.397	Male Oenocytes	470.176		FALSE	FALSE	FALSE
Anogam_AGAP000976	3.36244166807218	1.93787922377599	1.7351141530484	0.0827205879401456	NA	Female vs Male Oenocytes	Female Oenocytes	9.98776	Male Oenocytes	1.05316		FALSE	FALSE	FALSE
Anogam_AGAP000977	0.552417379392854	0.455116571913535	1.2137931542906	0.224826721113909	0.600324511691194	Female vs Male Oenocytes	Female Oenocytes	170.293	Male Oenocytes	120.053	RNA-binding motif protein2C X-linked 2	FALSE	FALSE	FALSE
Anogam_AGAP000978	0.898636571494597	0.50878110139208	1.76625383497113	0.0773532728620724	0.341791969016261	Female vs Male Oenocytes	Female Oenocytes	72.9977	Male Oenocytes	40.144	origin recognition complex subunit 5	FALSE	FALSE	FALSE
Anogam_AGAP000979	0.711375556346427	0.518148929104302	1.37291716027696	0.169778101182813	0.523375327972221	Female vs Male Oenocytes	Female Oenocytes	95.039	Male Oenocytes	59.6622	DNA polymerase gamma 2	FALSE	FALSE	FALSE
Anogam_AGAP000981	-0.193217681308051	0.359951893266744	-0.536787512226991	0.591414398570795	0.870242455408298	Female vs Male Oenocytes	Female Oenocytes	152.312	Male Oenocytes	178.491	nuclear receptor interaction protein	FALSE	FALSE	FALSE
Anogam_AGAP000982	-0.664885882583672	0.356832708976581	-1.8632985874266	0.0624202687842333	0.300778017155865	Female vs Male Oenocytes	Female Oenocytes	236.083	Male Oenocytes	386.738	uncharacterized protein Enpp4	FALSE	FALSE	FALSE
Anogam_AGAP000983	0.0821069582385034	0.320947289035031	0.255826925615631	0.798084481945309	0.951741115809819	Female vs Male Oenocytes	Female Oenocytes	494.059	Male Oenocytes	477.619		FALSE	FALSE	FALSE
Anogam_AGAP000984	-0.625730908963973	0.735870413101261	-0.85032758189976	0.395142985968032	0.759534383303872	Female vs Male Oenocytes	Female Oenocytes	62.2496	Male Oenocytes	100.316		FALSE	FALSE	FALSE
Anogam_AGAP000985	-0.037282480651916	0.422977492970028	-0.0881429420514293	0.929763066355226	0.985959666864399	Female vs Male Oenocytes	Female Oenocytes	1457.55	Male Oenocytes	1516.86	ARP2 actin-related protein 2 homolog	FALSE	FALSE	FALSE
Anogam_AGAP000986	1.49194967412836	0.499438465131943	2.98725424309122	0.00281495515416291	0.0430751633815966	Female vs Male Oenocytes	Female Oenocytes	137.923	Male Oenocytes	50.8718	CPAP3-D cuticular protein	FALSE	FALSE	FALSE
Anogam_AGAP000987	2.69451483901487	0.918467181837442	2.93370834832046	0.00334938772830964	0.0483452049975587	Female vs Male Oenocytes	Female Oenocytes	218.799	Male Oenocytes	35.2847	CPAP3-A1b cuticular protein	FALSE	FALSE	FALSE
Anogam_AGAP000988	3.17125844573798	1.12963512533848	2.80732988431796	0.00499540566073267	0.0613187551310201	Female vs Male Oenocytes	Female Oenocytes	66.0944	Male Oenocytes	7.62057	CPAP3-A1c cuticular protein	FALSE	FALSE	FALSE
Anogam_AGAP000989	0.230440661107394	1.6007870240687	0.143954603356096	0.885536317432757	0.972779552548534	Female vs Male Oenocytes	Female Oenocytes	9.98373	Male Oenocytes	8.72966	CPAP3-A1a cuticular protein	FALSE	FALSE	FALSE
Anogam_AGAP000990	2.86088281968687	1.90790840196716	1.49948646210538	0.13374747816661	NA	Female vs Male Oenocytes	Female Oenocytes	10.9915	Male Oenocytes	1.43785	testis development protein nyd-sp29	FALSE	FALSE	FALSE
Anogam_AGAP000991	1.29189776448619	0.651927130036685	1.98165976681089	0.0475173330585311	0.255974791531822	Female vs Male Oenocytes	Female Oenocytes	50.0868	Male Oenocytes	21.0796	seryl-tRNA synthetase	FALSE	FALSE	FALSE
Anogam_AGAP000992	1.66354740755185	1.57423193654525	1.05673590335272	0.290632134326757	0.67155059510165	Female vs Male Oenocytes	Female Oenocytes	14.3099	Male Oenocytes	4.45539		FALSE	FALSE	FALSE
Anogam_AGAP000994	0.787510085891122	0.261774664762431	3.00835104346639	0.0026266953254378	0.0411523670408201	Female vs Male Oenocytes	Female Oenocytes	1654.08	Male Oenocytes	990.394	lysosomal Pro-X carboxypeptidase	FALSE	FALSE	FALSE
Anogam_AGAP000995	0.306751888981858	0.320121027463594	0.958237237373427	0.337943144041434	0.712304362682223	Female vs Male Oenocytes	Female Oenocytes	531.949	Male Oenocytes	444.209	trafficking protein particle complex 1	FALSE	FALSE	FALSE
Anogam_AGAP000996	0.80403607053745	1.284378825068	0.626011621216878	0.531307318865031	0.843827675082314	Female vs Male Oenocytes	Female Oenocytes	29.9011	Male Oenocytes	17.0879		FALSE	FALSE	FALSE
Anogam_AGAP000997	-0.0685527069673279	0.290971751780529	-0.235599182902933	0.813743707562531	0.955975059819478	Female vs Male Oenocytes	Female Oenocytes	547.82	Male Oenocytes	594.489	mitogen-activated protein kinase kinase 1 interacting protein 1	FALSE	FALSE	FALSE
Anogam_AGAP000998	0.109619325229419	0.784860885491899	0.139667203775503	0.888922939964551	0.973742127450481	Female vs Male Oenocytes	Female Oenocytes	210.613	Male Oenocytes	197.822	insulin-like growth factor 2 receptor	FALSE	FALSE	FALSE
Anogam_AGAP000999	-0.0876808202627123	0.284428539922873	-0.308270120454467	0.757876800074682	0.937419997272391	Female vs Male Oenocytes	Female Oenocytes	1085.58	Male Oenocytes	1188.89	TOLL5A TOLL-like receptor 5A	FALSE	FALSE	FALSE
Anogam_AGAP001002	7.73983176497805	1.13038728838165	6.84706192694275	7.53820923886379e-12	2.64513162809234e-09	Female vs Male Oenocytes	Female Oenocytes	2962.45	Male Oenocytes	13.767	Toll protein	TRUE	FALSE	TRUE
Anogam_AGAP001004	-0.0600839553686749	0.823301483262708	-0.0729792871629051	0.941822600001448	0.988152293646708	Female vs Male Oenocytes	Female Oenocytes	141.201	Male Oenocytes	153.583	TOLL1A TOLL-like receptor 1A	FALSE	FALSE	FALSE
Anogam_AGAP001005	-4.32262185774344	3.69581867492325	-1.1695979261843	0.242162812296201	NA	Female vs Male Oenocytes	Female Oenocytes	0	Male Oenocytes	4.03705		FALSE	FALSE	FALSE
Anogam_AGAP001006	-4.56097628189864	2.66318739805834	-1.71260057975039	0.0867860465722541	NA	Female vs Male Oenocytes	Female Oenocytes	0	Male Oenocytes	5.08879		FALSE	FALSE	FALSE
Anogam_AGAP001007	0.798896188087677	0.355505400417342	2.2472125237755	0.0246264481816278	0.17475504651063	Female vs Male Oenocytes	Female Oenocytes	311.812	Male Oenocytes	185.76		FALSE	FALSE	FALSE
Anogam_AGAP001008	-0.635489182295642	2.05312167045182	-0.309523391351568	0.756923421456523	NA	Female vs Male Oenocytes	Female Oenocytes	4.62572	Male Oenocytes	7.5053		FALSE	FALSE	FALSE
Anogam_AGAP001009	-0.34607708128939	0.789159046579776	-0.438539078769092	0.660995548170354	0.901275125511944	Female vs Male Oenocytes	Female Oenocytes	169.817	Male Oenocytes	226.993		FALSE	FALSE	FALSE
Anogam_AGAP001010	0.834361263394197	0.751137446264881	1.11079705524356	0.266655714298557	0.646036453823057	Female vs Male Oenocytes	Female Oenocytes	88.5972	Male Oenocytes	51.3615	chondroitin sulfate synthase	FALSE	FALSE	FALSE
Anogam_AGAP001011	0.340865130622337	0.603540688429016	0.564775726239088	0.572226319448879	0.85991034371166	Female vs Male Oenocytes	Female Oenocytes	1473.91	Male Oenocytes	1171.17		FALSE	FALSE	FALSE
Anogam_AGAP001012	1.5745432188397	4.03873968642138	0.389860040777935	0.696640043350389	NA	Female vs Male Oenocytes	Female Oenocytes	0.722852	Male Oenocytes	0	Or36 odorant receptor 36	FALSE	FALSE	FALSE
Anogam_AGAP001013	NA	NA	NA	NA	NA	Female vs Male Oenocytes	Female Oenocytes	0	Male Oenocytes	0		FALSE	FALSE	FALSE
Anogam_AGAP001014	-1.41862002231343	0.961229915445901	-1.47583840194502	0.139987278891208	0.47141931011722	Female vs Male Oenocytes	Female Oenocytes	23.3775	Male Oenocytes	63.837		FALSE	FALSE	FALSE
Anogam_AGAP001015	1.10261118047878	0.671532956352344	1.64193159851452	0.100604180465289	0.395880951436497	Female vs Male Oenocytes	Female Oenocytes	525.791	Male Oenocytes	246.478	notch gene homolog 1	FALSE	FALSE	FALSE
Anogam_AGAP001018	-0.370127827171622	3.98572189939208	-0.0928634351604098	0.926012054696318	NA	Female vs Male Oenocytes	Female Oenocytes	0.719179	Male Oenocytes	1.00941		FALSE	FALSE	FALSE
Anogam_AGAP001019	0.868692266863985	0.649977662014383	1.33649557151206	0.181387347011645	0.543201189873603	Female vs Male Oenocytes	Female Oenocytes	163.264	Male Oenocytes	92.5541	polycomb-like protein 2	FALSE	FALSE	FALSE
Anogam_AGAP001021	0.377154384583163	0.229539711268284	1.6430899145915	0.100364331234419	0.395523941907091	Female vs Male Oenocytes	Female Oenocytes	2301.72	Male Oenocytes	1821.99	dihydropyrimidine dehydrogenase (NADP+)	FALSE	FALSE	FALSE
Anogam_AGAP001022	-0.382707421548391	0.92025515833272	-0.415870987609311	0.677504410282528	0.908816883605985	Female vs Male Oenocytes	Female Oenocytes	13.0676	Male Oenocytes	17.3507	GPRCCK1 putative gastrin-cholecystokinin receptor 1	FALSE	FALSE	FALSE
Anogam_AGAP001023	3.91069259863853	1.21460891190023	3.2197134076024	0.00128318810798026	0.0237413130669221	Female vs Male Oenocytes	Female Oenocytes	294.573	Male Oenocytes	20.2771	myofilin variant B	FALSE	FALSE	FALSE
Anogam_AGAP001024	NA	NA	NA	NA	NA	Female vs Male Oenocytes	Female Oenocytes	0	Male Oenocytes	0		FALSE	FALSE	FALSE
Anogam_AGAP001025	1.80846498972103	0.653286283147254	2.76825801547312	0.00563568195133006	0.0665298138477201	Female vs Male Oenocytes	Female Oenocytes	126.476	Male Oenocytes	37.1868	protein msta2C isoform A	FALSE	FALSE	FALSE
Anogam_AGAP001026	1.07215731527106	0.312599425675823	3.42981217240919	0.000603999198684739	0.0137194103701248	Female vs Male Oenocytes	Female Oenocytes	243.152	Male Oenocytes	119.598	carboxypeptidase A	FALSE	FALSE	FALSE
Anogam_AGAP001027	-0.938978265647508	0.543287860698038	-1.72832550398066	0.0839298830863348	0.35855184310938	Female vs Male Oenocytes	Female Oenocytes	855.922	Male Oenocytes	1706.89	sugar transporter ERD6-like 7	FALSE	FALSE	FALSE
Anogam_AGAP001028	0.445119994732008	0.376471168404118	1.18234816392155	0.237067582045373	0.614396647177603	Female vs Male Oenocytes	Female Oenocytes	217.477	Male Oenocytes	163.268		FALSE	FALSE	FALSE
Anogam_AGAP001029	0.255838867757867	0.476644794186093	0.536749526856223	0.591440640265094	0.870242455408298	Female vs Male Oenocytes	Female Oenocytes	144.104	Male Oenocytes	123.039		FALSE	FALSE	FALSE
Anogam_AGAP001030	0.378667626107573	0.651515185579121	0.581210744567652	0.561098427037079	0.85465693410293	Female vs Male Oenocytes	Female Oenocytes	208.168	Male Oenocytes	167.339		FALSE	FALSE	FALSE
Anogam_AGAP001031	0.841878505670762	0.480021742801489	1.75383410917475	0.0794589366086253	0.348073241037181	Female vs Male Oenocytes	Female Oenocytes	129.878	Male Oenocytes	73.5923	INO80 complex subunit E	FALSE	FALSE	FALSE
Anogam_AGAP001032	0.327977453676101	0.473673498989413	0.692412504342853	0.488678315374954	0.824737262389398	Female vs Male Oenocytes	Female Oenocytes	1922.63	Male Oenocytes	1549.52	Interferon-related developmental regulator 1	FALSE	FALSE	FALSE
Anogam_AGAP001033	1.30384943613746	0.926818845208118	1.40680073876215	0.159486483463421	0.50685023601617	Female vs Male Oenocytes	Female Oenocytes	29.216	Male Oenocytes	11.804	Protein mab-21-like	FALSE	FALSE	FALSE
Anogam_AGAP001034	0.541247606250801	1.10201572051866	0.491143271527983	0.623325118353915	0.886149765058102	Female vs Male Oenocytes	Female Oenocytes	24.231	Male Oenocytes	16.9812	mab-21 Protein mab-21	FALSE	FALSE	FALSE
Anogam_AGAP001035	0.12874109283931	0.315749732626639	0.407731438973349	0.683470853439133	0.909794033789489	Female vs Male Oenocytes	Female Oenocytes	172.448	Male Oenocytes	161.641	rapamycin-insensitive companion of mTOR	FALSE	FALSE	FALSE
Anogam_AGAP001036	0.33209412718715	0.385196845007337	0.862141347966714	0.388609740469595	0.755539304359687	Female vs Male Oenocytes	Female Oenocytes	554.186	Male Oenocytes	454.884	G protein beta subunit-like	FALSE	FALSE	FALSE
Anogam_AGAP001037	-0.000760661975655183	0.362402753725293	-0.00209894093749568	0.998325288661607	0.998820146928986	Female vs Male Oenocytes	Female Oenocytes	712.589	Male Oenocytes	737.037	Xaa-Pro aminopeptidase	FALSE	FALSE	FALSE
Anogam_AGAP001038	-1.95824292771931	1.33459600554489	-1.46729266353513	0.142296458612299	0.474290456219705	Female vs Male Oenocytes	Female Oenocytes	23.863	Male Oenocytes	96.8677	cholesterol 7-dehydrogenase	FALSE	FALSE	FALSE
Anogam_AGAP001039	-3.58599510358967	1.8042292987515	-1.98754953490176	NA	NA	Female vs Male Oenocytes	Female Oenocytes	283.011	Male Oenocytes	3495.26	CYP307A1 cytochrome P450	FALSE	FALSE	FALSE
Anogam_AGAP001040	0.715382853317237	0.364177085271103	1.96438184128111	0.0494858270680647	0.262001964747464	Female vs Male Oenocytes	Female Oenocytes	283.989	Male Oenocytes	179.52		FALSE	FALSE	FALSE
Anogam_AGAP001041	-0.224402107011299	0.225578886755962	-0.994783289510883	0.319841675274162	0.699035414001262	Female vs Male Oenocytes	Female Oenocytes	756.811	Male Oenocytes	910.518	E3 ubiquitin-protein ligase MARCH5	FALSE	FALSE	FALSE
Anogam_AGAP001042	1.20155623825937	0.750856738552865	1.60024699328816	0.109543800821764	0.411486791126714	Female vs Male Oenocytes	Female Oenocytes	66.0683	Male Oenocytes	29.2649	cytochrome b5 domain-containing protein 2 homolog	FALSE	FALSE	FALSE
Anogam_AGAP001043	0.261756348796756	0.411588085728345	0.635966778128559	0.524798075801906	0.841379232362355	Female vs Male Oenocytes	Female Oenocytes	1775.53	Male Oenocytes	1502.96	arm Armadillo segment polarity protein	FALSE	FALSE	FALSE
Anogam_AGAP001044	-0.211121832752207	0.498572646116575	-0.423452498641177	0.671965148668456	0.907014884918328	Female vs Male Oenocytes	Female Oenocytes	36.1109	Male Oenocytes	43.1111		FALSE	FALSE	FALSE
Anogam_AGAP001045	0.945709141130147	0.34415921840142	2.74788263851498	0.00599814749033861	0.0687355279973938	Female vs Male Oenocytes	Female Oenocytes	744.415	Male Oenocytes	400.092	DNA-directed RNA polymerase I subunit RPA49	FALSE	FALSE	FALSE
Anogam_AGAP001046	-0.348211077076295	0.327231125123301	-1.06411355871202	0.287277259330609	0.669108123357354	Female vs Male Oenocytes	Female Oenocytes	939.289	Male Oenocytes	1237.04	Abl interactor 2	FALSE	FALSE	FALSE
Anogam_AGAP001047	-0.701091303791386	0.451794511848547	-1.5517924308616	0.120711897635079	0.435493630291475	Female vs Male Oenocytes	Female Oenocytes	763.678	Male Oenocytes	1284.59	inositol polyphosphate 1-phosphatase	FALSE	FALSE	FALSE
Anogam_AGAP001048	-0.29721141802004	1.67979380530875	-0.176933274239222	0.859560801870443	0.965980865262181	Female vs Male Oenocytes	Female Oenocytes	25.651	Male Oenocytes	32.1432		FALSE	FALSE	FALSE
Anogam_AGAP001050	0.975598601690908	0.350663476010386	2.78215060430762	0.00539999749536284	0.064645004992727	Female vs Male Oenocytes	Female Oenocytes	401.717	Male Oenocytes	210.214	chondroitin polymerizing factor	FALSE	FALSE	FALSE
Anogam_AGAP001051	0.377323499713938	0.306595130950171	1.23068979779481	0.218438905265112	0.594023062527465	Female vs Male Oenocytes	Female Oenocytes	702.956	Male Oenocytes	555.922		FALSE	FALSE	FALSE
Anogam_AGAP001052	3.74318230934788	3.93649734901051	0.950891611876426	0.341659400349948	NA	Female vs Male Oenocytes	Female Oenocytes	3.18807	Male Oenocytes	0	ubiquitin carboxyl-terminal hydrolase 2-21	FALSE	FALSE	FALSE
Anogam_AGAP001053	4.6074521717803	1.26880714202821	3.63132584863545	0.000281968901727108	0.0073761325037919	Female vs Male Oenocytes	Female Oenocytes	245.812	Male Oenocytes	10.2928		FALSE	FALSE	FALSE
Anogam_AGAP001056	-0.183882940934079	0.334091986710771	-0.55039614312351	0.582047693481697	0.863919579779297	Female vs Male Oenocytes	Female Oenocytes	1576.01	Male Oenocytes	1856.88	ubiquitin-conjugating enzyme E2 L3	FALSE	FALSE	FALSE
Anogam_AGAP001057	0.291897058445164	0.339194285432836	0.860560071266184	0.389480385138541	0.756220644756687	Female vs Male Oenocytes	Female Oenocytes	1048.94	Male Oenocytes	885.297	ATP-dependent RNA helicase DDX10-DBP4	FALSE	FALSE	FALSE
Anogam_AGAP001058	-0.116283128795408	0.345940706143174	-0.336136010392725	0.736768304308528	0.93100139881331	Female vs Male Oenocytes	Female Oenocytes	474.175	Male Oenocytes	530.49	palmitoyl-protein thioesterase	FALSE	FALSE	FALSE
Anogam_AGAP001061	2.02533586568813	1.91785466360976	1.05604241245062	0.290948838377541	NA	Female vs Male Oenocytes	Female Oenocytes	9.24299	Male Oenocytes	2.45088		FALSE	FALSE	FALSE
Anogam_AGAP001064	0.136304377516419	0.236403998015663	0.576573910172995	0.56422732789493	0.856080662670096	Female vs Male Oenocytes	Female Oenocytes	5138.98	Male Oenocytes	4815.35	Transmembrane emp24 domain-containing protein 10 precursor	FALSE	FALSE	FALSE
Anogam_AGAP001065	0.84614554715528	0.588504357268759	1.43778977454344	0.150493711552971	0.488890123620984	Female vs Male Oenocytes	Female Oenocytes	1645.28	Male Oenocytes	953.452	glycine hydroxymethyltransferase	FALSE	FALSE	FALSE
Anogam_AGAP001067	0.295959506093499	1.18335257658207	0.250102557724877	0.802508038046352	0.952642291231842	Female vs Male Oenocytes	Female Oenocytes	27.7453	Male Oenocytes	22.9403		FALSE	FALSE	FALSE
Anogam_AGAP001068	-0.0589202780425177	0.258127358462182	-0.228260492779769	0.819443736026896	0.95702435153017	Female vs Male Oenocytes	Female Oenocytes	1963.97	Male Oenocytes	2114.92	ubiquitin-conjugating enzyme E2 H	FALSE	FALSE	FALSE
Anogam_AGAP001069	-0.454617912045908	0.28298880418618	-1.60648727200816	0.108166889300404	0.409184485323757	Female vs Male Oenocytes	Female Oenocytes	5236.8	Male Oenocytes	7426.71		FALSE	FALSE	FALSE
Anogam_AGAP001070	-0.131598253447643	0.276060777161515	-0.476700293322181	0.633575553977243	0.890929700281113	Female vs Male Oenocytes	Female Oenocytes	859.536	Male Oenocytes	968.448	DnaJ-like protein subfamily C	FALSE	FALSE	FALSE
Anogam_AGAP001072	-0.5067710958648	0.753287821865788	-0.672745637397402	0.501109128066499	0.829961993360139	Female vs Male Oenocytes	Female Oenocytes	75.7558	Male Oenocytes	108.103		FALSE	FALSE	FALSE
Anogam_AGAP001073	-0.157730453074515	0.272541918520792	-0.57873832374333	0.562765752810554	0.855681277641666	Female vs Male Oenocytes	Female Oenocytes	1112.94	Male Oenocytes	1276.53		FALSE	FALSE	FALSE
Anogam_AGAP001076	-0.377986096491038	0.764359800106092	-0.494513312236691	0.620943707160294	0.885471295412437	Female vs Male Oenocytes	Female Oenocytes	266337	Male Oenocytes	364580	CYP4G16 cytochrome P450	FALSE	FALSE	FALSE
Anogam_AGAP001078	-0.148128276142132	1.45001946551432	-0.102156060428879	0.918632803926348	0.982862728709338	Female vs Male Oenocytes	Female Oenocytes	11.6975	Male Oenocytes	12.9962		FALSE	FALSE	FALSE
Anogam_AGAP001081	0.0596480147473962	0.346459954946387	0.17216423975067	0.863308410603506	0.965980865262181	Female vs Male Oenocytes	Female Oenocytes	358.777	Male Oenocytes	353.214	Wiskott-Aldrich syndrome protein	FALSE	FALSE	FALSE
Anogam_AGAP001082	-0.257437019454183	0.233067169841456	-1.10456148598408	0.269349647297938	0.648573983931094	Female vs Male Oenocytes	Female Oenocytes	27841.2	Male Oenocytes	34311.6	saposin	FALSE	FALSE	FALSE
Anogam_AGAP001083	-0.0676064143161797	0.239714304152701	-0.282029120269408	0.777921181508067	0.945209067824011	Female vs Male Oenocytes	Female Oenocytes	554.902	Male Oenocytes	596.351		FALSE	FALSE	FALSE
Anogam_AGAP001084	0.692251091477152	0.971222849324548	0.712762361345379	0.475992819997042	0.815850250343591	Female vs Male Oenocytes	Female Oenocytes	1977.49	Male Oenocytes	1289.86	Fatty acyl-CoA reductase	FALSE	FALSE	FALSE
Anogam_AGAP001085	0.106453725293006	0.896195540682159	0.118784038148613	0.905446454855674	0.979640302378329	Female vs Male Oenocytes	Female Oenocytes	20.7964	Male Oenocytes	19.8334		FALSE	FALSE	FALSE
Anogam_AGAP001087	0.34013725774962	1.65100388345741	0.206018448022865	0.836776500965998	NA	Female vs Male Oenocytes	Female Oenocytes	5.3497	Male Oenocytes	4.46665		FALSE	FALSE	FALSE
Anogam_AGAP001089	-0.377720525063239	2.2590326921055	-0.16720454129913	0.867209111283592	NA	Female vs Male Oenocytes	Female Oenocytes	3.77087	Male Oenocytes	4.7902		FALSE	FALSE	FALSE
Anogam_AGAP001090	-0.174237611042304	0.206850921702227	-0.842334226062229	0.399600898297109	0.763344986121904	Female vs Male Oenocytes	Female Oenocytes	1886.33	Male Oenocytes	2187.38	Breast carcinoma amplified sequence 3	FALSE	FALSE	FALSE
Anogam_AGAP001091	0.119698542390452	0.248233120099538	0.482202142657089	0.62966235489435	0.888935089262612	Female vs Male Oenocytes	Female Oenocytes	786.028	Male Oenocytes	747.106	N-terminal kinase-like protein	FALSE	FALSE	FALSE
Anogam_AGAP001092	0.363792781205144	0.235917797959197	1.5420319465175	0.123065830623632	0.43998235706957	Female vs Male Oenocytes	Female Oenocytes	1338.65	Male Oenocytes	1074.28		FALSE	FALSE	FALSE
Anogam_AGAP001093	0.116343281936558	0.2217806362252	0.524587195333056	0.599870190014993	0.874789202291855	Female vs Male Oenocytes	Female Oenocytes	5359.76	Male Oenocytes	5085.54	fos-like antigen2C invertebrate	FALSE	FALSE	FALSE
Anogam_AGAP001094	-0.392171014217206	0.950770202368956	-0.412477182435951	0.679989701705072	0.909783783475787	Female vs Male Oenocytes	Female Oenocytes	45.5377	Male Oenocytes	59.5893	run runt	FALSE	FALSE	FALSE
Anogam_AGAP001096	-0.577840031162475	1.44763348972789	-0.399161828779668	0.689773967072911	0.911636849844894	Female vs Male Oenocytes	Female Oenocytes	12.3567	Male Oenocytes	18.8407		FALSE	FALSE	FALSE
Anogam_AGAP001097	-0.227644720990438	0.813143486146285	-0.279956397448759	0.779510957518622	0.946088886277735	Female vs Male Oenocytes	Female Oenocytes	5098.81	Male Oenocytes	6300.51	Elongation of very long chain fatty acids protein	FALSE	FALSE	FALSE
Anogam_AGAP001098	-0.430826381771769	0.702096832457835	-0.613628151922538	0.539461076075099	0.844807003715021	Female vs Male Oenocytes	Female Oenocytes	571.469	Male Oenocytes	810.482	DAMOX	FALSE	FALSE	FALSE
Anogam_AGAP001099	-0.0879514995940605	0.268598179723945	-0.327446372438018	0.743330297692083	0.932921695771416	Female vs Male Oenocytes	Female Oenocytes	1835.48	Male Oenocytes	2015.16	Polybromo-1	FALSE	FALSE	FALSE
Anogam_AGAP001100	-0.167043592626893	0.945950631217451	-0.176588066136079	0.859831968610322	0.965980865262181	Female vs Male Oenocytes	Female Oenocytes	33.0289	Male Oenocytes	37.7071		FALSE	FALSE	FALSE
Anogam_AGAP001101	0.110426162996845	1.00572348145662	0.109797737681247	0.912569785266662	0.981496315869193	Female vs Male Oenocytes	Female Oenocytes	63.0872	Male Oenocytes	60.3707	COEBE2O carboxylesterase	FALSE	FALSE	FALSE
Anogam_AGAP001102	0.133440713192288	0.236451674678745	0.564346661420719	0.572518231327338	0.85991034371166	Female vs Male Oenocytes	Female Oenocytes	769.357	Male Oenocytes	718.952	C-myc promoter-binding protein	FALSE	FALSE	FALSE
Anogam_AGAP001103	-0.339169766689471	0.250996282628863	-1.35129398386743	0.176601278438747	0.535168138592225	Female vs Male Oenocytes	Female Oenocytes	681.878	Male Oenocytes	889.24	mitogen-activated protein kinase kinase 1	FALSE	FALSE	FALSE
Anogam_AGAP001104	3.41117809667613	0.626840464978076	5.44186007008249	5.2727087161418e-08	5.96167598838432e-06	Female vs Male Oenocytes	Female Oenocytes	550.653	Male Oenocytes	53.7536	chromatin assembly factor 1 subunit A	TRUE	FALSE	TRUE
Anogam_AGAP001106	-0.302194889064134	2.7297037407626	-0.110706112370901	0.911849398807251	NA	Female vs Male Oenocytes	Female Oenocytes	4.29366	Male Oenocytes	5.41086	Disconnected protein	FALSE	FALSE	FALSE
Anogam_AGAP001107	-0.283119901593845	0.422092648158205	-0.670752980013357	0.502377905906576	0.830984465836971	Female vs Male Oenocytes	Female Oenocytes	2475.98	Male Oenocytes	3133.8		FALSE	FALSE	FALSE
Anogam_AGAP001108	0.903171180091114	0.289866251400416	3.11582040243619	0.00183433953748371	0.0314776376617777	Female vs Male Oenocytes	Female Oenocytes	439.312	Male Oenocytes	242.418	mitochondrial import inner membrane translocase subunit TIM50-C	FALSE	FALSE	FALSE
Anogam_AGAP001109	-0.0698578379399601	0.551134190249728	-0.126752865592146	0.899136002544422	0.978005386158501	Female vs Male Oenocytes	Female Oenocytes	496.74	Male Oenocytes	531.277	protein-tyrosine phosphatase	FALSE	FALSE	FALSE
Anogam_AGAP001110	-0.490209947573529	0.224381100785976	-2.1847203077995	0.0289093602593697	0.192401340745157	Female vs Male Oenocytes	Female Oenocytes	547.178	Male Oenocytes	789.882	Sorting nexin family member 27 isoform 1	FALSE	FALSE	FALSE
Anogam_AGAP001111	-0.376783351554602	0.399647373217374	-0.942789510966367	0.345788577870458	0.719251183129249	Female vs Male Oenocytes	Female Oenocytes	510.269	Male Oenocytes	677.049		FALSE	FALSE	FALSE
Anogam_AGAP001112	-4.66475953333276	1.0636753146085	-4.38551075621201	1.15713939651838e-05	0.000540139931145461	Female vs Male Oenocytes	Female Oenocytes	4.0088	Male Oenocytes	104.385		FALSE	TRUE	TRUE
Anogam_AGAP001113	-0.454429107554247	0.745356567642989	-0.609680154816734	0.542073703072895	0.846143724206057	Female vs Male Oenocytes	Female Oenocytes	43.4729	Male Oenocytes	61.8227	A disintegrin and metalloproteinase with thrombospondin motifs 18	FALSE	FALSE	FALSE
Anogam_AGAP001114	0.299840834500413	2.8385745143347	0.105630778049414	0.91587530400431	NA	Female vs Male Oenocytes	Female Oenocytes	6.45915	Male Oenocytes	5.65251	Gr38 gustatory receptor 38	FALSE	FALSE	FALSE
Anogam_AGAP001115	NA	NA	NA	NA	NA	Female vs Male Oenocytes	Female Oenocytes	0	Male Oenocytes	0	Gr42 gustatory receptor 42	FALSE	FALSE	FALSE
Anogam_AGAP001116	-0.194626662451821	0.984938804056003	-0.197602796894937	0.843355846349609	0.964158311871689	Female vs Male Oenocytes	Female Oenocytes	235.358	Male Oenocytes	280.729	D-amino-acid oxidase	FALSE	FALSE	FALSE
Anogam_AGAP001117	-5.25299809901288	3.18497082134584	-1.64930807648441	0.0990845358832722	NA	Female vs Male Oenocytes	Female Oenocytes	0	Male Oenocytes	8.25673	Gr37 gustatory receptor 37	FALSE	FALSE	FALSE
Anogam_AGAP001118	NA	NA	NA	NA	NA	Female vs Male Oenocytes	Female Oenocytes	0	Male Oenocytes	0		FALSE	FALSE	FALSE
Anogam_AGAP001119	NA	NA	NA	NA	NA	Female vs Male Oenocytes	Female Oenocytes	0	Male Oenocytes	0	Gr39 gustatory receptor 39	FALSE	FALSE	FALSE
Anogam_AGAP001120	-2.89815075220494	3.98488665955349	-0.727285616833499	0.467051007273774	NA	Female vs Male Oenocytes	Female Oenocytes	0	Male Oenocytes	1.59937	Gr40 gustatory receptor 40	FALSE	FALSE	FALSE
Anogam_AGAP001121	NA	NA	NA	NA	NA	Female vs Male Oenocytes	Female Oenocytes	0	Male Oenocytes	0	Gr60 gustatory receptor 60	FALSE	FALSE	FALSE
Anogam_AGAP001122	NA	NA	NA	NA	NA	Female vs Male Oenocytes	Female Oenocytes	0	Male Oenocytes	0	Gr41 gustatory receptor 41	FALSE	FALSE	FALSE
Anogam_AGAP001123	NA	NA	NA	NA	NA	Female vs Male Oenocytes	Female Oenocytes	0	Male Oenocytes	0	Gr36 gustatory receptor 36	FALSE	FALSE	FALSE
Anogam_AGAP001124	6.38420110889389	2.02719979013855	3.14927080199508	0.00163678444444299	0.0285693284848231	Female vs Male Oenocytes	Female Oenocytes	41.6187	Male Oenocytes	0.520338	Aminomethyltransferase	FALSE	FALSE	FALSE
Anogam_AGAP001125	NA	NA	NA	NA	NA	Female vs Male Oenocytes	Female Oenocytes	0	Male Oenocytes	0	Gr58 gustatory receptor 58	FALSE	FALSE	FALSE
Anogam_AGAP001126	2.00797323224441	2.48111098118771	0.809304076870918	0.418340261788112	0.777785588585806	Female vs Male Oenocytes	Female Oenocytes	15.3444	Male Oenocytes	3.78792	defective proboscis extension response	FALSE	FALSE	FALSE
Anogam_AGAP001127	-0.0588646711788561	0.856068232452445	-0.0687616581802387	0.945179338157771	0.988804262101975	Female vs Male Oenocytes	Female Oenocytes	94.7337	Male Oenocytes	102.368	P37NB protein	FALSE	FALSE	FALSE
Anogam_AGAP001130	0.464957807597575	0.42240139692597	1.10074874510669	0.271006024728615	0.650297375714417	Female vs Male Oenocytes	Female Oenocytes	422.539	Male Oenocytes	318.26	poly(A) RNA polymerase GLD2	FALSE	FALSE	FALSE
Anogam_AGAP001132	0.106172300723029	0.676501469692926	0.156943193000337	0.875289618544236	0.970044343095855	Female vs Male Oenocytes	Female Oenocytes	88.0194	Male Oenocytes	84.4623		FALSE	FALSE	FALSE
Anogam_AGAP001133	-0.305773626650487	0.29358841718482	-1.04150439442574	0.297641514766738	0.678038964465262	Female vs Male Oenocytes	Female Oenocytes	361.683	Male Oenocytes	460.879	regulator of nonsense transcripts 1	FALSE	FALSE	FALSE
Anogam_AGAP001134	0.619879801230326	0.298729627902456	2.07505296874247	0.0379816259044495	0.225233697671141	Female vs Male Oenocytes	Female Oenocytes	450.961	Male Oenocytes	303.194	mRpS30 28S ribosomal protein S302C mitochondrial	FALSE	FALSE	FALSE
Anogam_AGAP001135	2.88301727711452	0.566581390809584	5.08844329143072	3.61014699960505e-07	3.11329287016788e-05	Female vs Male Oenocytes	Female Oenocytes	293.46	Male Oenocytes	40.2951	DNA replication licensing factor MCM3	TRUE	FALSE	TRUE
Anogam_AGAP001136	-0.332320038921637	0.356270905946055	-0.932773441151985	0.350936956724889	0.724652124537067	Female vs Male Oenocytes	Female Oenocytes	1334.11	Male Oenocytes	1742.59	tetratricopeptide repeat protein 35	FALSE	FALSE	FALSE
Anogam_AGAP001137	-0.681462779314756	0.432907849150851	-1.57415205257065	0.115452301101731	0.424839416272151	Female vs Male Oenocytes	Female Oenocytes	42.8463	Male Oenocytes	70.5247	Gr59 gustatory receptor 59	FALSE	FALSE	FALSE
Anogam_AGAP001138	0.296827341070682	0.268573894813838	1.1051980360058	0.269073787705954	0.648223215837071	Female vs Male Oenocytes	Female Oenocytes	3177.56	Male Oenocytes	2675.88	F-type H+-transporting ATPase subunit b	FALSE	FALSE	FALSE
Anogam_AGAP001139	0.289313413667825	0.422705184004889	0.684433086262975	0.493701729291565	0.826913913747672	Female vs Male Oenocytes	Female Oenocytes	288.886	Male Oenocytes	245.522	mRpL19 39S ribosomal protein L192C mitochondrial	FALSE	FALSE	FALSE
Anogam_AGAP001140	0.0240945420474927	0.210833544565911	0.114282298374774	0.909014014407972	0.980560630693263	Female vs Male Oenocytes	Female Oenocytes	1273.2	Male Oenocytes	1288.74		FALSE	FALSE	FALSE
Anogam_AGAP001141	0.342165956911267	0.273273164491662	1.25210229679068	0.210532590899606	0.582168381791953	Female vs Male Oenocytes	Female Oenocytes	911.429	Male Oenocytes	739.123		FALSE	FALSE	FALSE
Anogam_AGAP001143	-0.110992479140432	0.226600418686567	-0.489815860816908	0.624264206154397	0.88672704659787	Female vs Male Oenocytes	Female Oenocytes	478.755	Male Oenocytes	533.178	histone deacetylase 3	FALSE	FALSE	FALSE
Anogam_AGAP001144	-0.0536060220054993	0.462649591198198	-0.115867436231095	0.90775760395221	0.980094631933418	Female vs Male Oenocytes	Female Oenocytes	432.077	Male Oenocytes	466.708		FALSE	FALSE	FALSE
Anogam_AGAP001145	1.23141088750455	0.45121045668308	2.72912754849886	0.00635021371288591	0.0713242546824802	Female vs Male Oenocytes	Female Oenocytes	149.599	Male Oenocytes	65.2733	pre-mRNA-splicing factor 38A	FALSE	FALSE	FALSE
Anogam_AGAP001146	0.463041135340996	0.316480709581815	1.46309434136709	0.143441566034858	0.476156584014971	Female vs Male Oenocytes	Female Oenocytes	223.558	Male Oenocytes	167.181	U3 small nucleolar RNA-associated protein 12	FALSE	FALSE	FALSE
Anogam_AGAP001147	0.328139993702816	0.556386128572558	0.589770263584176	0.555344681302394	0.851360039989641	Female vs Male Oenocytes	Female Oenocytes	81.3069	Male Oenocytes	66.3163		FALSE	FALSE	FALSE
Anogam_AGAP001148	0.217115075505574	0.34330114363068	0.632433301006256	0.527103779444702	0.842680129744677	Female vs Male Oenocytes	Female Oenocytes	3308.35	Male Oenocytes	2914.6		FALSE	FALSE	FALSE
Anogam_AGAP001149	0.950490199338374	0.278438060620951	3.41365040834815	0.000640987665714108	0.0143671596614686	Female vs Male Oenocytes	Female Oenocytes	379.993	Male Oenocytes	201.581	protein MAK11	FALSE	FALSE	FALSE
Anogam_AGAP001150	0.107641503829259	0.321972416873791	0.334319022959824	0.738138837224927	0.931371216130695	Female vs Male Oenocytes	Female Oenocytes	918.311	Male Oenocytes	878.99		FALSE	FALSE	FALSE
Anogam_AGAP001151	-0.0181656238204876	0.207771337689669	-0.0874308459601878	0.930329051719063	0.986086226279092	Female vs Male Oenocytes	Female Oenocytes	14763.3	Male Oenocytes	15403.1	14-3-3 protein epsilon	FALSE	FALSE	FALSE
Anogam_AGAP001152	0.101309952011327	0.305448094533016	0.33167649045647	0.740133554601824	0.93201324732436	Female vs Male Oenocytes	Female Oenocytes	578.032	Male Oenocytes	557.551	GPN-loop GTPase 3	FALSE	FALSE	FALSE
Anogam_AGAP001153	0.2020157831799	0.242019158533467	0.834709881664036	0.403881076517909	0.766342314869708	Female vs Male Oenocytes	Female Oenocytes	708.866	Male Oenocytes	635.889	Polymerase delta-interacting protein 2	FALSE	FALSE	FALSE
Anogam_AGAP001154	-0.125032155336694	0.342362543166737	-0.365203956543229	0.714959165082429	0.923673960025699	Female vs Male Oenocytes	Female Oenocytes	331.865	Male Oenocytes	370.619	SWI-SNF-related matrix-associated actin-dependent regulator of chromatin	FALSE	FALSE	FALSE
Anogam_AGAP001156	-0.288973109909889	0.448652275842854	-0.644091483470163	0.519516112630575	0.839009040172786	Female vs Male Oenocytes	Female Oenocytes	184.92	Male Oenocytes	234.145		FALSE	FALSE	FALSE
Anogam_AGAP001157	-0.285972645948836	0.23488897893646	-1.21748005054845	0.223421622167265	0.599669243624575	Female vs Male Oenocytes	Female Oenocytes	3654.68	Male Oenocytes	4580.05		FALSE	FALSE	FALSE
Anogam_AGAP001158	0.95019110667769	0.76002502935041	1.25021028253479	0.211222741603727	0.582996514522574	Female vs Male Oenocytes	Female Oenocytes	90.1765	Male Oenocytes	48.3956		FALSE	FALSE	FALSE
Anogam_AGAP001159	0.171196429789758	0.550742761559047	0.310846445453288	0.755917359137454	0.936882568620485	Female vs Male Oenocytes	Female Oenocytes	132.018	Male Oenocytes	121.557	WD repeat-containing protein 24	FALSE	FALSE	FALSE
Anogam_AGAP001160	1.97731955050645	1.33499143806191	1.48114773932711	0.13856720884175	0.468458444243738	Female vs Male Oenocytes	Female Oenocytes	59.8237	Male Oenocytes	15.0041		FALSE	FALSE	FALSE
Anogam_AGAP001161	-1.93565851238216	3.9849033974072	-0.485747913899647	0.627145907792793	NA	Female vs Male Oenocytes	Female Oenocytes	0.368251	Male Oenocytes	1.58446	GPROP6 long wavelength sensitive opsin	FALSE	FALSE	FALSE
Anogam_AGAP001162	0.355341998855066	1.46463388189027	0.242614897312397	0.808303739586538	0.954649646272286	Female vs Male Oenocytes	Female Oenocytes	18.0299	Male Oenocytes	14.8939	GPROP5 long wavelength sensitive opsin	FALSE	FALSE	FALSE
Anogam_AGAP001165	-10.0368442756321	1.55990421749372	-6.43426959365377	1.24068480492609e-10	3.23723296793022e-08	Female vs Male Oenocytes	Female Oenocytes	0	Male Oenocytes	214.302	zinc finger protein DZIP1	FALSE	TRUE	TRUE
Anogam_AGAP001166	1.08776707089323	0.493296656166817	2.20509719110154	0.0274472751554514	0.185830653347886	Female vs Male Oenocytes	Female Oenocytes	120.555	Male Oenocytes	58.666	GINS complex subunit 4	FALSE	FALSE	FALSE
Anogam_AGAP001167	0.929783391340701	0.386716218579402	2.40430410381093	0.0162032879313284	0.133186315015507	Female vs Male Oenocytes	Female Oenocytes	514.014	Male Oenocytes	279.465	pre-rRNA-processing protein TSR2	FALSE	FALSE	FALSE
Anogam_AGAP001168	-0.615292241810063	0.348461675153911	-1.76573863262953	0.0774397082385258	0.342025378053489	Female vs Male Oenocytes	Female Oenocytes	228.072	Male Oenocytes	357.852		FALSE	FALSE	FALSE
Anogam_AGAP001169	0.508796876620463	0.632320240979829	0.804650624234396	0.421021319960558	0.780100683160713	Female vs Male Oenocytes	Female Oenocytes	37.986	Male Oenocytes	27.2526	Gr49 gustatory receptor 49	FALSE	FALSE	FALSE
Anogam_AGAP001170	2.85596751710467	1.49786831093224	1.90668798869721	0.0565610033031314	0.284933054263696	Female vs Male Oenocytes	Female Oenocytes	19.1037	Male Oenocytes	2.63959	Gr48 gustatory receptor 48	FALSE	FALSE	FALSE
Anogam_AGAP001171	-0.354461971117465	0.947230658167678	-0.374208718922945	0.708249037710653	0.920781810149874	Female vs Male Oenocytes	Female Oenocytes	18.7397	Male Oenocytes	24.2374	Gr50 gustatory receptor 50	FALSE	FALSE	FALSE
Anogam_AGAP001172	-0.323825456081972	0.923142432234581	-0.350786016084335	0.725748888946729	0.927640339093844	Female vs Male Oenocytes	Female Oenocytes	13.6935	Male Oenocytes	17.6422	Gr51 gustatory receptor 51	FALSE	FALSE	FALSE
Anogam_AGAP001173	0.0470399353317181	0.91877814119076	0.0511983614137284	0.959167457536535	0.992237966420474	Female vs Male Oenocytes	Female Oenocytes	30.1547	Male Oenocytes	30.4513	Gr52 gustatory receptor 52	FALSE	FALSE	FALSE
Anogam_AGAP001174	0.469483075334552	0.735381338644263	0.638421252570923	0.523199500088701	0.84130979841272	Female vs Male Oenocytes	Female Oenocytes	2637.37	Male Oenocytes	1905.6	14.5 kDa salivary peptide	FALSE	FALSE	FALSE
Anogam_AGAP001175	0.182574647011921	0.72238485867458	0.252738751123474	0.800470100712426	0.952642291231842	Female vs Male Oenocytes	Female Oenocytes	75.8101	Male Oenocytes	68.0649	GPRCAL2 putative calcitonin receptor 2	FALSE	FALSE	FALSE
Anogam_AGAP001176	-4.25647512824453	3.80758123188769	-1.11789476547406	0.263611940945887	NA	Female vs Male Oenocytes	Female Oenocytes	0	Male Oenocytes	4.18981		FALSE	FALSE	FALSE
Anogam_AGAP001177	-0.0820743929587001	0.659747746253989	-0.124402687882928	0.900996445259163	0.978290634545161	Female vs Male Oenocytes	Female Oenocytes	29.425	Male Oenocytes	32.4507	Ca2+-triggered coelenterazine-binding protein 1	FALSE	FALSE	FALSE
Anogam_AGAP001179	0.412495206703138	0.289537672680779	1.42466851682517	0.154253043906489	0.49689109680039	Female vs Male Oenocytes	Female Oenocytes	458.717	Male Oenocytes	353.228	nuclear pore complex protein Nup88	FALSE	FALSE	FALSE
Anogam_AGAP001181	0.806092553549506	0.845111675140073	0.953829626618162	0.340169890159448	0.714314651725659	Female vs Male Oenocytes	Female Oenocytes	217.978	Male Oenocytes	129.305		FALSE	FALSE	FALSE
Anogam_AGAP001182	-1.82896240391091	1.3981350078046	-1.3081443449319	NA	NA	Female vs Male Oenocytes	Female Oenocytes	24.1043	Male Oenocytes	87.4504		FALSE	FALSE	FALSE
Anogam_AGAP001183	NA	NA	NA	NA	NA	Female vs Male Oenocytes	Female Oenocytes	0	Male Oenocytes	0	Pyrimidine-specific ribonucleoside hydrolase rihA	FALSE	FALSE	FALSE
Anogam_AGAP001184	NA	NA	NA	NA	NA	Female vs Male Oenocytes	Female Oenocytes	0	Male Oenocytes	0	ganglioside GM2 activator	FALSE	FALSE	FALSE
Anogam_AGAP001185	-0.145698729245589	0.479102954313298	-0.304107348814871	0.761046108286456	0.938065312719263	Female vs Male Oenocytes	Female Oenocytes	71.9034	Male Oenocytes	82.4303	sodium-coupled monocarboxylate transporter 1	FALSE	FALSE	FALSE
Anogam_AGAP001187	1.14369377699872	0.851560257087043	1.34305678016373	0.179253588883681	0.539191404221204	Female vs Male Oenocytes	Female Oenocytes	605.035	Male Oenocytes	272.82	Homeobox protein cut-like	FALSE	FALSE	FALSE
Anogam_AGAP001189	-0.120043828929532	0.861291631957283	-0.139376518330652	0.889152626894155	0.973742127450481	Female vs Male Oenocytes	Female Oenocytes	56.677	Male Oenocytes	63.807	OBP10 odorant-binding protein 10	FALSE	FALSE	FALSE
Anogam_AGAP001190	0.387358865285309	3.66127892090714	0.105798786067174	0.915741999963331	NA	Female vs Male Oenocytes	Female Oenocytes	4.53632	Male Oenocytes	3.71779	female reproductive tract protease GLEANR_896	FALSE	FALSE	FALSE
Anogam_AGAP001192	-5.83643661357794	2.58274548502922	-2.25978000829297	NA	NA	Female vs Male Oenocytes	Female Oenocytes	32.1042	Male Oenocytes	1883.39		FALSE	FALSE	FALSE
Anogam_AGAP001193	-4.93032368108278	2.29913461398734	-2.14442584226603	NA	NA	Female vs Male Oenocytes	Female Oenocytes	18.9225	Male Oenocytes	592.937		FALSE	FALSE	FALSE
Anogam_AGAP001194	0.11726138021576	0.792729135457978	0.147921118287163	0.882405021564777	0.97200189428915	Female vs Male Oenocytes	Female Oenocytes	564.255	Male Oenocytes	522.353		FALSE	FALSE	FALSE
Anogam_AGAP001195	0.155130398295904	0.24252672199759	0.639642498023148	0.522405046775907	0.841138252530321	Female vs Male Oenocytes	Female Oenocytes	443.472	Male Oenocytes	410.137	Cbp80 Nuclear cap-binding protein subunit 1	FALSE	FALSE	FALSE
Anogam_AGAP001196	0.659311421521057	0.908202744467986	0.725951804855284	0.467868316495458	0.809494075381765	Female vs Male Oenocytes	Female Oenocytes	49.7259	Male Oenocytes	32.6342	Enn protein	FALSE	FALSE	FALSE
Anogam_AGAP001197	0.589942878439938	0.821436389441688	0.718184494895471	0.472643536912922	0.813504620376837	Female vs Male Oenocytes	Female Oenocytes	37.8973	Male Oenocytes	25.4914	GALE10 galectin 10	FALSE	FALSE	FALSE
Anogam_AGAP001198	0.816108528261747	2.11136312427623	0.386531581838394	0.699103017632293	0.916218637772756	Female vs Male Oenocytes	Female Oenocytes	14.3868	Male Oenocytes	8.58856	chymotrypsin	FALSE	FALSE	FALSE
Anogam_AGAP001199	1.76070065848549	1.24891797627767	1.40978085985532	0.158604399950416	0.505151290734096	Female vs Male Oenocytes	Female Oenocytes	38.6662	Male Oenocytes	11.7067	serine protease	FALSE	FALSE	FALSE
Anogam_AGAP001200	-0.417637752237132	0.717308813537205	-0.582228664077986	0.560412668321628	0.854217991737699	Female vs Male Oenocytes	Female Oenocytes	345.68	Male Oenocytes	481.095	glycogen debranching enzyme	FALSE	FALSE	FALSE
Anogam_AGAP001201	-0.245931687014969	1.08194017764226	-0.22730617837938	0.820185669191687	0.95702435153017	Female vs Male Oenocytes	Female Oenocytes	25.6092	Male Oenocytes	30.6191	defective proboscis extension response	FALSE	FALSE	FALSE
Anogam_AGAP001202	-1.39910657781355	2.80885654550901	-0.49810538742199	0.618409763524857	NA	Female vs Male Oenocytes	Female Oenocytes	2.16277	Male Oenocytes	5.89408	organic cation transporter	FALSE	FALSE	FALSE
Anogam_AGAP001203	-0.645352406665412	1.8035996224896	-0.357813562732177	0.720482840087962	0.924427358559464	Female vs Male Oenocytes	Female Oenocytes	14.0834	Male Oenocytes	21.7953		FALSE	FALSE	FALSE
Anogam_AGAP001205	-6.52523317728962	2.92984005659705	-2.22716361686601	NA	NA	Female vs Male Oenocytes	Female Oenocytes	5.20816	Male Oenocytes	463.404	chitin synthase	FALSE	FALSE	FALSE
Anogam_AGAP001206	-2.85575057979022	3.98718959429974	-0.716231448806177	0.473848447284301	NA	Female vs Male Oenocytes	Female Oenocytes	0	Male Oenocytes	1.44282		FALSE	FALSE	FALSE
Anogam_AGAP001207	-0.187865892476704	0.411784365744719	-0.456223956285822	0.648228940200046	0.896992814788647	Female vs Male Oenocytes	Female Oenocytes	620.039	Male Oenocytes	734.327	COMM domain-containing protein 4	FALSE	FALSE	FALSE
Anogam_AGAP001208	-0.112782621853189	0.247053411514903	-0.456511088681671	0.648022498839079	0.896992814788647	Female vs Male Oenocytes	Female Oenocytes	456.631	Male Oenocytes	506.7		FALSE	FALSE	FALSE
Anogam_AGAP001209	-0.139895977994313	0.288006345062851	-0.485739222043124	0.627152071151022	0.887731183201113	Female vs Male Oenocytes	Female Oenocytes	1295.01	Male Oenocytes	1457.46	ubiquitin carboxyl-terminal hydrolase 6-32	FALSE	FALSE	FALSE
Anogam_AGAP001211	0.176526310822006	0.379082329635361	0.465667473848771	0.641453537671178	0.894826144764564	Female vs Male Oenocytes	Female Oenocytes	745.509	Male Oenocytes	670.652	Ras-related protein Rab-8A	FALSE	FALSE	FALSE
Anogam_AGAP001212	-1.9433412556629	0.448497364571233	-4.33300484947274	1.47087868635639e-05	0.000659368348562228	Female vs Male Oenocytes	Female Oenocytes	966.519	Male Oenocytes	3791.9	PGRPLB peptidoglycan recognition protein (long)	FALSE	TRUE	TRUE
Anogam_AGAP001213	-1.51879769999646	0.76451709672685	-1.986610510738	0.0469655755494317	0.253943515829446	Female vs Male Oenocytes	Female Oenocytes	202.838	Male Oenocytes	608.907		FALSE	FALSE	FALSE
Anogam_AGAP001214	-0.38524828718489	0.697966886570411	-0.551957828655566	0.580977246555863	0.863294637439295	Female vs Male Oenocytes	Female Oenocytes	28.128	Male Oenocytes	37.4927		FALSE	FALSE	FALSE
Anogam_AGAP001215	-0.579030380032966	0.58248143914183	-0.994075246219091	0.320186235570624	0.699335070164543	Female vs Male Oenocytes	Female Oenocytes	119.783	Male Oenocytes	186.32	tetratricopeptide repeat protein 39C	FALSE	FALSE	FALSE
Anogam_AGAP001217	-0.326492507103417	0.378400184361811	-0.862823329893617	0.388234609991418	0.754954211976432	Female vs Male Oenocytes	Female Oenocytes	243.736	Male Oenocytes	313.831	soluble calcium-activated nucleotidase 1	FALSE	FALSE	FALSE
Anogam_AGAP001218	-0.0433679149941246	0.345740727693247	-0.125434788326709	0.900179348493028	0.978284144650082	Female vs Male Oenocytes	Female Oenocytes	29784.9	Male Oenocytes	31258.8	tubulin alpha-4A chain	FALSE	FALSE	FALSE
Anogam_AGAP001220	0.0861498274258567	0.677238268943374	0.127207559549562	0.898776122335434	0.978005386158501	Female vs Male Oenocytes	Female Oenocytes	57.1326	Male Oenocytes	56.165	NAD-dependent deacetylase sirtuin 7	FALSE	FALSE	FALSE
Anogam_AGAP001222	-0.217862609394463	0.442648194289599	-0.492180047733185	0.622592068000336	0.885711852924845	Female vs Male Oenocytes	Female Oenocytes	107.792	Male Oenocytes	128.007		FALSE	FALSE	FALSE
Anogam_AGAP001223	1.01475434020035	0.515049524295748	1.97020731470021	0.0488146155761899	0.259664154784793	Female vs Male Oenocytes	Female Oenocytes	245.934	Male Oenocytes	125.678	ATP-dependent RNA helicase DDX55-SPB4	FALSE	FALSE	FALSE
Anogam_AGAP001224	0.619049171973035	0.427929072868406	1.4466162998077	0.148004418451567	0.484070848545699	Female vs Male Oenocytes	Female Oenocytes	173.452	Male Oenocytes	116.462	cleavage and polyadenylation specificity factor subunit 3	FALSE	FALSE	FALSE
Anogam_AGAP001225	-0.769375040514415	0.681187727733399	-1.12946110035548	0.258703370360887	0.638197696192093	Female vs Male Oenocytes	Female Oenocytes	66.6637	Male Oenocytes	117.37		FALSE	FALSE	FALSE
Anogam_AGAP001226	-0.120514403435169	0.659289629009486	-0.182794326093419	0.854959400725646	0.965717243862683	Female vs Male Oenocytes	Female Oenocytes	56.4253	Male Oenocytes	64.1992		FALSE	FALSE	FALSE
Anogam_AGAP001227	-0.599338166323993	0.427462953122391	-1.40208212652382	0.1608907237282	0.509510311789213	Female vs Male Oenocytes	Female Oenocytes	110.581	Male Oenocytes	174.035	gamma-tubulin complex component 5	FALSE	FALSE	FALSE
Anogam_AGAP001228	0.0555232723813376	0.326515626702311	0.170047825710832	0.864972524845062	0.966317717813307	Female vs Male Oenocytes	Female Oenocytes	213.99	Male Oenocytes	212.935	DNA-directed RNA polymerase II subunit RPB4	FALSE	FALSE	FALSE
Anogam_AGAP001229	-0.172578831985793	0.282775813432321	-0.610302663056782	0.541661333180764	0.84586533317695	Female vs Male Oenocytes	Female Oenocytes	834.38	Male Oenocytes	972.458	dynein light chain Tctex-type 1	FALSE	FALSE	FALSE
Anogam_AGAP001230	-1.11583155700786	1.13013583459056	-0.987342868755342	0.323474581689535	0.702483803648401	Female vs Male Oenocytes	Female Oenocytes	5.39584	Male Oenocytes	12.2591		FALSE	FALSE	FALSE
Anogam_AGAP001231	-0.308956468710253	0.526091118695125	-0.587267980262743	0.557023742358509	0.851603606105798	Female vs Male Oenocytes	Female Oenocytes	55.5695	Male Oenocytes	71.3973		FALSE	FALSE	FALSE
Anogam_AGAP001232	0.319116002759318	0.392618120407074	0.81278979795546	0.416338585766376	0.775377278323323	Female vs Male Oenocytes	Female Oenocytes	365.656	Male Oenocytes	300.926	alpha-12C3-alpha-12C 6-mannosyltransferase	FALSE	FALSE	FALSE
Anogam_AGAP001233	0.421537077771302	0.335629693136807	1.25595883317594	0.209130896003631	0.581168049381315	Female vs Male Oenocytes	Female Oenocytes	345.311	Male Oenocytes	266.99		FALSE	FALSE	FALSE
Anogam_AGAP001234	0.403915590472281	0.425356172376372	0.949593815027282	0.342318682378685	0.71701500763594	Female vs Male Oenocytes	Female Oenocytes	253.967	Male Oenocytes	196.108	Activating signal cointegrator 1 complex subunit 3	FALSE	FALSE	FALSE
Anogam_AGAP001235	-0.662522612447943	0.477288483183177	-1.38809679217354	0.165107573262184	0.516147856143342	Female vs Male Oenocytes	Female Oenocytes	198.302	Male Oenocytes	321.649	phosphatidylserine decarboxylase	FALSE	FALSE	FALSE
Anogam_AGAP001236	0.416431241943305	0.894559569214182	0.465515384636839	0.641562422229867	0.894826144764564	Female vs Male Oenocytes	Female Oenocytes	89.2331	Male Oenocytes	68	Sugar transporter ERD6-like 6	FALSE	FALSE	FALSE
Anogam_AGAP001237	-0.311055925901004	0.400572334339663	-0.776528729608286	0.437436864338283	0.790088308751574	Female vs Male Oenocytes	Female Oenocytes	207.607	Male Oenocytes	266.592	Med29 Mediator of RNA polymerase II transcription subunit 29	FALSE	FALSE	FALSE
Anogam_AGAP001238	-1.7069654198064	1.95851256012068	-0.871562151075111	0.38344728624702	0.750376843240321	Female vs Male Oenocytes	Female Oenocytes	5.95099	Male Oenocytes	18.9371	Ras-specific guanine nucleotide-releasing factor 2	FALSE	FALSE	FALSE
Anogam_AGAP001239	-0.377130173537143	1.2008137370699	-0.31406217458619	0.753473817363457	0.936326641332982	Female vs Male Oenocytes	Female Oenocytes	6.86946	Male Oenocytes	8.9866	defective proboscis extension response	FALSE	FALSE	FALSE
Anogam_AGAP001240	-6.36637646578922	1.82351763650358	-3.49126125152051	NA	NA	Female vs Male Oenocytes	Female Oenocytes	15.5132	Male Oenocytes	1307.96	SP11372	FALSE	FALSE	FALSE
Anogam_AGAP001241	0.891784062089472	3.68138504108122	0.242241453186205	0.808593076364115	NA	Female vs Male Oenocytes	Female Oenocytes	4.88137	Male Oenocytes	2.55946	eupolytin	FALSE	FALSE	FALSE
Anogam_AGAP001242	1.69641359726052	0.6817899481828	2.48817630970072	0.0128400061060003	0.114815379731686	Female vs Male Oenocytes	Female Oenocytes	672.84	Male Oenocytes	208.917	defective proboscis extension response	FALSE	FALSE	FALSE
Anogam_AGAP001243	0.672311747138654	0.83979341374404	0.800568016056825	0.423381773039555	0.781911601170691	Female vs Male Oenocytes	Female Oenocytes	1654.69	Male Oenocytes	1032.03		FALSE	FALSE	FALSE
Anogam_AGAP001244	0.123057366139241	2.82171721550422	0.0436108074413304	0.965214636802781	NA	Female vs Male Oenocytes	Female Oenocytes	4.80052	Male Oenocytes	4.68996	eupolytin	FALSE	FALSE	FALSE
Anogam_AGAP001245	0.479488789630237	2.5214250593082	0.190165790516016	0.849179217148882	NA	Female vs Male Oenocytes	Female Oenocytes	2.55986	Male Oenocytes	1.90224	eupolytin	FALSE	FALSE	FALSE
Anogam_AGAP001246	2.18610163506478	2.59195958652211	0.84341655881992	0.398995514204012	NA	Female vs Male Oenocytes	Female Oenocytes	2.16365	Male Oenocytes	0.518079	eupolytin	FALSE	FALSE	FALSE
Anogam_AGAP001247	0.689592213364308	4.0804728567969	0.168998113102418	0.865798125578915	NA	Female vs Male Oenocytes	Female Oenocytes	0.407872	Male Oenocytes	0	eupolytin	FALSE	FALSE	FALSE
Anogam_AGAP001248	1.52419272996087	1.76988286089074	0.861182829463518	0.389137355403901	NA	Female vs Male Oenocytes	Female Oenocytes	9.23385	Male Oenocytes	3.15475	eupolytin	FALSE	FALSE	FALSE
Anogam_AGAP001249	3.00165587202232	2.9621702962807	1.01332994790718	0.310902587463066	NA	Female vs Male Oenocytes	Female Oenocytes	7.13277	Male Oenocytes	0.880185	eupolytin	FALSE	FALSE	FALSE
Anogam_AGAP001250	4.74049150270439	3.27095425419904	1.44926866421896	0.147262568497104	NA	Female vs Male Oenocytes	Female Oenocytes	7.05443	Male Oenocytes	0	eupolytin	FALSE	FALSE	FALSE
Anogam_AGAP001251	-1.26977708836082	0.717756480330107	-1.76909177856093	0.0768785596938632	0.340433517599979	Female vs Male Oenocytes	Female Oenocytes	19.0166	Male Oenocytes	46.3413	eupolytin	FALSE	FALSE	FALSE
Anogam_AGAP001252	0.0878472640163517	1.59498139675484	0.05507729694847	0.956076883095012	0.99137241641324	Female vs Male Oenocytes	Female Oenocytes	12.8971	Male Oenocytes	12.082	eupolytin	FALSE	FALSE	FALSE
Anogam_AGAP001253	0.0701229717219881	0.375694202827437	0.186649065102016	0.851935794299942	0.964978216171848	Female vs Male Oenocytes	Female Oenocytes	207.891	Male Oenocytes	202.247		FALSE	FALSE	FALSE
Anogam_AGAP001255	-0.284281285144562	0.334197275543245	-0.850639146242161	0.394969836786568	0.759344995114324	Female vs Male Oenocytes	Female Oenocytes	357.306	Male Oenocytes	445.322		FALSE	FALSE	FALSE
Anogam_AGAP001256	0.322545041215884	0.65160261333417	0.49500268202649	0.620598227309683	0.88510267149311	Female vs Male Oenocytes	Female Oenocytes	1958.46	Male Oenocytes	1570.45	3-phosphoadenosine 5-phosphosulfate synthase	FALSE	FALSE	FALSE
Anogam_AGAP001257	-1.00424104008635	0.474535813906062	-2.11625974406465	0.0343227224837565	0.210783357872484	Female vs Male Oenocytes	Female Oenocytes	1124.64	Male Oenocytes	2340.78	UTP--glucose-1-phosphate uridylyltransferase	FALSE	FALSE	FALSE
Anogam_AGAP001258	-0.154079312681916	0.557890199162673	-0.276182146438799	0.782408169227471	0.946969930806763	Female vs Male Oenocytes	Female Oenocytes	33.3736	Male Oenocytes	38.2569		FALSE	FALSE	FALSE
Anogam_AGAP001259	0.997126299148794	2.20400737161492	0.452415137984852	0.650969943513058	NA	Female vs Male Oenocytes	Female Oenocytes	8.05533	Male Oenocytes	4.21853		FALSE	FALSE	FALSE
Anogam_AGAP001261	1.14080508927091	0.399390593903217	2.85636443793506	0.00428522953090701	0.0558287045582846	Female vs Male Oenocytes	Female Oenocytes	442.285	Male Oenocytes	208.207	L-caldesmon	FALSE	FALSE	FALSE
Anogam_AGAP001264	0.19111947604234	0.547190368990278	0.349274195733763	0.726883468881843	0.928380008813067	Female vs Male Oenocytes	Female Oenocytes	2235.42	Male Oenocytes	1981.58	Plasma glutamate carboxypeptidase	FALSE	FALSE	FALSE
Anogam_AGAP001265	0.148730581998727	0.895065963431765	0.166167174348224	0.868025391354277	0.967260882875725	Female vs Male Oenocytes	Female Oenocytes	39.5664	Male Oenocytes	35.6392	solute carrier family 7 (cationic amino acid transporter)2C member 14	FALSE	FALSE	FALSE
Anogam_AGAP001267	-0.503242335577321	0.348696585948786	-1.44320981580024	0.148961375258376	0.485999023606679	Female vs Male Oenocytes	Female Oenocytes	3140.15	Male Oenocytes	4602.68	Adaptor-related protein complex 22C beta 1 subunit	FALSE	FALSE	FALSE
Anogam_AGAP001268	-0.505236119125996	0.410975033290368	-1.22935964036781	0.218936995303554	0.594424456832703	Female vs Male Oenocytes	Female Oenocytes	299.791	Male Oenocytes	440.496		FALSE	FALSE	FALSE
Anogam_AGAP001269	0.0687194520351798	0.429986207606155	0.159817805361151	0.873024597716047	0.969646180567398	Female vs Male Oenocytes	Female Oenocytes	92.465	Male Oenocytes	89.8005		FALSE	FALSE	FALSE
Anogam_AGAP001270	0.319816868206016	0.448378002060281	0.713275108806562	0.475675536962409	0.815841805047157	Female vs Male Oenocytes	Female Oenocytes	85.3402	Male Oenocytes	70.0895		FALSE	FALSE	FALSE
Anogam_AGAP001271	-0.545056478155044	0.315301399564056	-1.72868397954673	0.0838656701405208	0.358515926305712	Female vs Male Oenocytes	Female Oenocytes	781.451	Male Oenocytes	1164.76	pre-mRNA cleavage complex 2 protein Pcf11	FALSE	FALSE	FALSE
Anogam_AGAP001272	-0.200091280835057	0.496488686211733	-0.403012770264267	0.686938830023962	0.911125008342444	Female vs Male Oenocytes	Female Oenocytes	235.907	Male Oenocytes	274.69		FALSE	FALSE	FALSE
Anogam_AGAP001273	-0.14013437130897	0.345465805407532	-0.40563890583515	0.685007937939126	0.909828118944494	Female vs Male Oenocytes	Female Oenocytes	1195.96	Male Oenocytes	1347.88	karyopherin (importin) alpha 4	FALSE	FALSE	FALSE
Anogam_AGAP001274	0.699292730921157	0.252315908513087	2.77149679162972	0.00557992221954874	0.0662019831022731	Female vs Male Oenocytes	Female Oenocytes	5610.37	Male Oenocytes	3566.39	RpS15 40S ribosomal protein S15	FALSE	FALSE	FALSE
Anogam_AGAP001275	0.0531244262040247	1.04379733570777	0.0508953456640151	0.959408914327171	0.992265448927695	Female vs Male Oenocytes	Female Oenocytes	7.87429	Male Oenocytes	7.89425		FALSE	FALSE	FALSE
Anogam_AGAP001276	0.720150159032079	0.486813217722708	1.47931513117271	0.139056110673001	0.469487386266908	Female vs Male Oenocytes	Female Oenocytes	107.502	Male Oenocytes	67.4633	asparaginyl-tRNA synthetase	FALSE	FALSE	FALSE
Anogam_AGAP001277	-0.138303292882209	0.372495900290144	-0.371288094109175	0.710422964743847	0.921358280521817	Female vs Male Oenocytes	Female Oenocytes	178.755	Male Oenocytes	201.297		FALSE	FALSE	FALSE
Anogam_AGAP001278	-0.468294936175616	0.485971627060826	-0.96362608452654	0.335233424330229	0.71101065003856	Female vs Male Oenocytes	Female Oenocytes	91.8416	Male Oenocytes	131.219	Cysteine-rich hydrophobic domain 2	FALSE	FALSE	FALSE
Anogam_AGAP001279	0.0489293406793778	0.255967689675577	0.191154363042431	0.848404657257649	0.96473911080968	Female vs Male Oenocytes	Female Oenocytes	1195.84	Male Oenocytes	1190.51	protein phosphatase 32C catalytic subunit	FALSE	FALSE	FALSE
Anogam_AGAP001280	3.54456835975092	0.842930516253054	4.20505402450848	2.61019800920551e-05	0.00104985671706226	Female vs Male Oenocytes	Female Oenocytes	97.4526	Male Oenocytes	8.27269	potassium inwardly-rectifying channel subfamily J	FALSE	FALSE	FALSE
Anogam_AGAP001281	-0.345006322196639	0.236526341756252	-1.4586380511993	0.144664754790488	0.478734486096913	Female vs Male Oenocytes	Female Oenocytes	779.881	Male Oenocytes	1021.28	potassium inwardly-rectifying channel subfamily J	FALSE	FALSE	FALSE
Anogam_AGAP001283	0.378491439503529	1.26150949031423	0.300030592246477	0.764153820709071	0.938793828266993	Female vs Male Oenocytes	Female Oenocytes	147.078	Male Oenocytes	111.01	potassium inwardly-rectifying channel subfamily J	FALSE	FALSE	FALSE
Anogam_AGAP001284	2.78271427357162	1.67865078005234	1.65770886156849	NA	NA	Female vs Male Oenocytes	Female Oenocytes	50.3465	Male Oenocytes	7.2473	potassium inwardly-rectifying channel subfamily J	FALSE	FALSE	FALSE
Anogam_AGAP001285	-0.628926077610518	0.308188666173651	-2.04071773767354	0.0412788912494554	0.235192607701264	Female vs Male Oenocytes	Female Oenocytes	1598.57	Male Oenocytes	2525.27	charged multivesicular body protein 2A	FALSE	FALSE	FALSE
Anogam_AGAP001286	-0.214385251455063	0.35002106730677	-0.612492422540866	0.540212009880895	0.8455925876862	Female vs Male Oenocytes	Female Oenocytes	250.717	Male Oenocytes	298.294	integrator complex subunit 4	FALSE	FALSE	FALSE
Anogam_AGAP001287	0.0575574023358593	0.241831979461551	0.238005752853752	0.81187663226975	0.955766950073668	Female vs Male Oenocytes	Female Oenocytes	954.083	Male Oenocytes	939.061		FALSE	FALSE	FALSE
Anogam_AGAP001290	0.252875904575	0.646004740689652	0.39144589605494	0.695467673097816	0.914673194519602	Female vs Male Oenocytes	Female Oenocytes	241.765	Male Oenocytes	212.509	replication factor C subunit 1	FALSE	FALSE	FALSE
Anogam_AGAP001291	-1.65606828123121	2.16610473959052	-0.764537490252793	0.444547004137408	NA	Female vs Male Oenocytes	Female Oenocytes	1.88255	Male Oenocytes	5.86454	zinc finger protein ZIC2C invertebrate	FALSE	FALSE	FALSE
Anogam_AGAP001292	0.620424355028256	0.42826806249546	1.44868228420566	0.14742633010615	0.483470942687779	Female vs Male Oenocytes	Female Oenocytes	133.685	Male Oenocytes	89.3385		FALSE	FALSE	FALSE
Anogam_AGAP001293	-5.10005603294908	1.36877962896242	-3.72598767912339	0.000194551907475034	0.00537978318061399	Female vs Male Oenocytes	Female Oenocytes	3.73879	Male Oenocytes	125.928		FALSE	FALSE	FALSE
Anogam_AGAP001294	-2.46182295006213	1.92409843900222	-1.27946829546764	0.200732197299526	0.569459692996122	Female vs Male Oenocytes	Female Oenocytes	2.85729	Male Oenocytes	16.3163		FALSE	FALSE	FALSE
Anogam_AGAP001296	-0.193680233013568	0.366400577130838	-0.528602423419238	0.597081278812818	0.87328885561574	Female vs Male Oenocytes	Female Oenocytes	367.878	Male Oenocytes	435.186	E3 ubiquitin-protein ligase TRIP12	FALSE	FALSE	FALSE
Anogam_AGAP001297	0.0160135156489957	0.294802338307278	0.0543195001130027	0.956680613644771	0.991530256448432	Female vs Male Oenocytes	Female Oenocytes	441.31	Male Oenocytes	448.423	solute carrier family 25	FALSE	FALSE	FALSE
Anogam_AGAP001298	-0.1320394243772	0.290856626887279	-0.453967392079986	0.649852296565362	0.898130038932628	Female vs Male Oenocytes	Female Oenocytes	334.34	Male Oenocytes	376.853		FALSE	FALSE	FALSE
Anogam_AGAP001299	-0.46699248678771	0.38191400956967	-1.2227686732778	0.221417080687974	0.597813514026475	Female vs Male Oenocytes	Female Oenocytes	424.024	Male Oenocytes	596.033	mannose-1-phosphate guanylyltransferase	FALSE	FALSE	FALSE
Anogam_AGAP001300	-0.245359482448165	0.325792090206411	-0.753116757048071	0.451379755626995	0.800216096386813	Female vs Male Oenocytes	Female Oenocytes	393.838	Male Oenocytes	482.564		FALSE	FALSE	FALSE
Anogam_AGAP001301	-2.62062955360704	0.946408331945134	-2.76902629145383	0.00562240979750804	0.0664502231120114	Female vs Male Oenocytes	Female Oenocytes	6.92695	Male Oenocytes	44.5808	Bardet-Biedl syndrome 5 protein	FALSE	FALSE	FALSE
Anogam_AGAP001302	0.0797957662620214	0.358601931126482	0.22251906455539	0.823909833891461	0.957057454177612	Female vs Male Oenocytes	Female Oenocytes	437.352	Male Oenocytes	427.71	RNA polymerase II-associated factor 1	FALSE	FALSE	FALSE
Anogam_AGAP001303	0.551291338656698	1.17248475478031	0.470190624150157	0.638218832118612	0.893699578318287	Female vs Male Oenocytes	Female Oenocytes	17.8627	Male Oenocytes	13.0019	SAP1 chemosensory protein 6	FALSE	FALSE	FALSE
Anogam_AGAP001304	-0.653946217840321	1.52583411995195	-0.428582772720349	0.668226884710584	0.904495868562494	Female vs Male Oenocytes	Female Oenocytes	14.8109	Male Oenocytes	22.9806	lachesin	FALSE	FALSE	FALSE
Anogam_AGAP001306	-0.352356709660044	0.333142090150992	-1.05767694949727	0.290202747539891	0.671312379851315	Female vs Male Oenocytes	Female Oenocytes	1058.9	Male Oenocytes	1383.9	actin related protein 2-3 complex2C subunit 4	FALSE	FALSE	FALSE
Anogam_AGAP001307	-0.56986453727501	0.465465001608715	-1.22429083885034	0.220842531632352	0.59775531773428	Female vs Male Oenocytes	Female Oenocytes	501.962	Male Oenocytes	775.333	ubiquitin fusion degradation protein 1	FALSE	FALSE	FALSE
Anogam_AGAP001308	-1.00751762717636	1.22784017588932	-0.820560889731936	0.411896432774471	0.771907569044754	Female vs Male Oenocytes	Female Oenocytes	17.5657	Male Oenocytes	35.7396	coiled-coil domain-containing protein 64	FALSE	FALSE	FALSE
Anogam_AGAP001309	-2.38916960395394	1.28610923891118	-1.85767237468616	0.0632155538178828	0.301868360230303	Female vs Male Oenocytes	Female Oenocytes	4.14686	Male Oenocytes	21.6617		FALSE	FALSE	FALSE
Anogam_AGAP001310	-0.143447738302647	0.294463795577631	-0.487148982173698	0.626152756694269	0.887731183201113	Female vs Male Oenocytes	Female Oenocytes	167.259	Male Oenocytes	190.425	Protein-S-isoprenylcysteine O-methyltransferase	FALSE	FALSE	FALSE
Anogam_AGAP001311	1.18526695434744	0.277455836829549	4.2719121280393	1.93803949217149e-05	0.000825166940265149	Female vs Male Oenocytes	Female Oenocytes	495.819	Male Oenocytes	224.501	RpL20 60S ribosomal protein L20	TRUE	FALSE	TRUE
Anogam_AGAP001312	-0.26892951096474	0.264301504688326	-1.01751032890211	0.308910721178394	0.690266907929587	Female vs Male Oenocytes	Female Oenocytes	3215.16	Male Oenocytes	4008.93	succinyl-CoA synthetase alpha subunit	FALSE	FALSE	FALSE
Anogam_AGAP001313	-0.781406287444321	0.344168850274528	-2.27041548594833	0.0231823857682934	0.167664504319938	Female vs Male Oenocytes	Female Oenocytes	2141.43	Male Oenocytes	3750.77	Muscular protein 20	FALSE	FALSE	FALSE
Anogam_AGAP001314	-0.291106991243869	0.248398955342753	-1.17193323475207	0.241223862493341	0.61806051138651	Female vs Male Oenocytes	Female Oenocytes	578.893	Male Oenocytes	730.314		FALSE	FALSE	FALSE
Anogam_AGAP001315	-0.30306539655238	0.238532884836516	-1.27053926656734	0.20389260503058	0.574262703789422	Female vs Male Oenocytes	Female Oenocytes	2821.96	Male Oenocytes	3588.07		FALSE	FALSE	FALSE
Anogam_AGAP001316	-0.928964712363984	0.769025601827103	-1.2079763146466	0.227056373031108	0.602562639055706	Female vs Male Oenocytes	Female Oenocytes	114.073	Male Oenocytes	228.727		FALSE	FALSE	FALSE
Anogam_AGAP001318	1.04108998699385	0.354995799801475	2.93268254885287	0.00336047301567866	0.0483679963331627	Female vs Male Oenocytes	Female Oenocytes	184.429	Male Oenocytes	91.8597	acetyl-CoA C-acetyltransferase	FALSE	FALSE	FALSE
Anogam_AGAP001319	-0.0640709344029264	0.23344761681709	-0.274455294410339	0.783734754860121	0.947403661631018	Female vs Male Oenocytes	Female Oenocytes	338.065	Male Oenocytes	364.229	5-nucleotidase domain-containing protein 1	FALSE	FALSE	FALSE
Anogam_AGAP001320	-0.284240859570981	0.317498672438612	-0.895250545105631	0.37065317060427	0.741889587739782	Female vs Male Oenocytes	Female Oenocytes	357.366	Male Oenocytes	449.965	golgi apparatus protein 1	FALSE	FALSE	FALSE
Anogam_AGAP001321	0.0696862827623331	0.536582846949498	0.129870500256397	0.896668883974164	0.977136706288402	Female vs Male Oenocytes	Female Oenocytes	501.583	Male Oenocytes	497.772		FALSE	FALSE	FALSE
Anogam_AGAP001322	0.00120212936541116	0.503318656231183	0.00238840613303037	0.99809432943334	0.998820146928986	Female vs Male Oenocytes	Female Oenocytes	186.372	Male Oenocytes	189.648		FALSE	FALSE	FALSE
Anogam_AGAP001323	0.669949690205017	0.633254519699093	1.05794695397257	0.29007962696989	0.671312379851315	Female vs Male Oenocytes	Female Oenocytes	26.1699	Male Oenocytes	16.8394		FALSE	FALSE	FALSE
Anogam_AGAP001324	-1.18814512606646	0.36302767736728	-3.27287752460922	0.00106458596567602	0.0206347176889889	Female vs Male Oenocytes	Female Oenocytes	1654.56	Male Oenocytes	3909.24	Erythroid differentiation-related factor 1	FALSE	FALSE	FALSE
Anogam_AGAP001325	0.162239704817336	0.21314554270756	0.761168649160694	0.446556341188464	0.796940955442618	Female vs Male Oenocytes	Female Oenocytes	2035.45	Male Oenocytes	1870.14	peroxiredoxin 52C atypical 2-Cys peroxiredoxin	FALSE	FALSE	FALSE
Anogam_AGAP001326	0.576742988767849	0.398459962001419	1.447430215751	0.14777646815215	0.483914015262802	Female vs Male Oenocytes	Female Oenocytes	169.958	Male Oenocytes	117.506	mitotic spindle assembly checkpoint protein MAD2B	FALSE	FALSE	FALSE
Anogam_AGAP001328	-0.363234342574551	0.36919041420132	-0.983867209446231	0.325180808137864	0.703855271434684	Female vs Male Oenocytes	Female Oenocytes	285.356	Male Oenocytes	378.807	tripartite motif-containing protein 33	FALSE	FALSE	FALSE
Anogam_AGAP001329	-0.0385626592387696	2.08843724926374	-0.0184648397994072	0.985268026556261	NA	Female vs Male Oenocytes	Female Oenocytes	6.6542	Male Oenocytes	7.0497	CPLCX1 cuticular protein unclassified	FALSE	FALSE	FALSE
Anogam_AGAP001330	-0.405882338878622	0.751853452540616	-0.539842355590827	0.589305754318736	0.869116566327933	Female vs Male Oenocytes	Female Oenocytes	226.8	Male Oenocytes	300.253	furin	FALSE	FALSE	FALSE
Anogam_AGAP001331	-2.21707221782497	4.03118083432039	-0.549980839100398	0.582332515871492	NA	Female vs Male Oenocytes	Female Oenocytes	0	Male Oenocytes	1.0627		FALSE	FALSE	FALSE
Anogam_AGAP001332	NA	NA	NA	NA	NA	Female vs Male Oenocytes	Female Oenocytes	0	Male Oenocytes	0		FALSE	FALSE	FALSE
Anogam_AGAP001333	-0.17266720021201	0.738273446446308	-0.233879737979398	0.815078343760297	0.956474127363858	Female vs Male Oenocytes	Female Oenocytes	173.274	Male Oenocytes	204.698	st protein scarlet	FALSE	FALSE	FALSE
Anogam_AGAP001334	0.14765153580722	0.341275116989437	0.432646649160155	0.665271493952336	0.90327914825675	Female vs Male Oenocytes	Female Oenocytes	292.714	Male Oenocytes	273.204		FALSE	FALSE	FALSE
Anogam_AGAP001335	-0.46225380967463	0.278179330021575	-1.66171156440264	0.096570621283691	0.385699273236932	Female vs Male Oenocytes	Female Oenocytes	1258.32	Male Oenocytes	1790.2	dynein light chain LC8-type	FALSE	FALSE	FALSE
Anogam_AGAP001336	1.8150835486296	1.01749860367711	1.78386834347499	0.0744450609570755	0.334312859796646	Female vs Male Oenocytes	Female Oenocytes	97.5262	Male Oenocytes	29.0031		FALSE	FALSE	FALSE
Anogam_AGAP001337	-2.66271193611368	0.708667610467521	-3.75734956245149	0.000171722538349906	0.00482720593991338	Female vs Male Oenocytes	Female Oenocytes	12.163	Male Oenocytes	80.4703		FALSE	FALSE	FALSE
Anogam_AGAP001338	-0.648470947471541	0.460430547346776	-1.40840122621826	0.159012296343749	0.506133602625585	Female vs Male Oenocytes	Female Oenocytes	104.563	Male Oenocytes	167.045	DEAH (Asp-Glu-Ala-His) box polypeptide 34	FALSE	FALSE	FALSE
Anogam_AGAP001339	-0.140404552516861	0.551085056480106	-0.254778370173298	0.798894282193616	0.95238381157477	Female vs Male Oenocytes	Female Oenocytes	95.929	Male Oenocytes	109.086	phosphatidylinositol glycan2C class V	FALSE	FALSE	FALSE
Anogam_AGAP001340	0.125944962406692	0.460019575025631	0.273781745917388	0.784252352479068	0.947471439965214	Female vs Male Oenocytes	Female Oenocytes	160.273	Male Oenocytes	150.57		FALSE	FALSE	FALSE
Anogam_AGAP001341	0.0607899558758122	0.24407009415407	0.24906761349237	0.803308480843226	0.952642291231842	Female vs Male Oenocytes	Female Oenocytes	1948.75	Male Oenocytes	1930.64	bleomycin hydrolase	FALSE	FALSE	FALSE
Anogam_AGAP001342	0.59295307932353	0.357372882391794	1.65919998001826	0.0970755016411472	0.386956661620167	Female vs Male Oenocytes	Female Oenocytes	171.516	Male Oenocytes	117.501		FALSE	FALSE	FALSE
Anogam_AGAP001343	-0.88663600177497	0.902760264075785	-0.982138932181156	0.326031407740247	0.704392709387135	Female vs Male Oenocytes	Female Oenocytes	15.3021	Male Oenocytes	28.8671	fatty acyl-CoA reductase 2	FALSE	FALSE	FALSE
Anogam_AGAP001344	-5.69802099060889	2.49864889369995	-2.28044084343974	0.0225815555551771	NA	Female vs Male Oenocytes	Female Oenocytes	0	Male Oenocytes	10.6449		FALSE	FALSE	FALSE
Anogam_AGAP001345	3.37709141625629	3.94504564376419	0.856033547189586	0.391979223701557	NA	Female vs Male Oenocytes	Female Oenocytes	2.66142	Male Oenocytes	0	hexamerin	FALSE	FALSE	FALSE
Anogam_AGAP001346	-8.0652155094054	1.84783880980561	-4.36467481178936	NA	NA	Female vs Male Oenocytes	Female Oenocytes	0.772854	Male Oenocytes	211.713		FALSE	FALSE	FALSE
Anogam_AGAP001347	-0.735568006732971	0.415284769712734	-1.77123761904822	0.0765211959632293	0.339460074792619	Female vs Male Oenocytes	Female Oenocytes	128.894	Male Oenocytes	218.627		FALSE	FALSE	FALSE
Anogam_AGAP001348	-1.0785388741192	1.89061757177029	-0.570469083871522	0.568359585142852	NA	Female vs Male Oenocytes	Female Oenocytes	3.28367	Male Oenocytes	7.13351		FALSE	FALSE	FALSE
Anogam_AGAP001349	-0.37013231456507	0.364290787311274	-1.01603534170301	0.309612557166305	0.691228034603844	Female vs Male Oenocytes	Female Oenocytes	350.089	Male Oenocytes	468.66	chronic lymphocytic leukemia deletion region gene 6 protein-like protein	FALSE	FALSE	FALSE
Anogam_AGAP001350	1.20634110252232	0.948416406502923	1.27195300951239	0.203389815645892	0.574026682751468	Female vs Male Oenocytes	Female Oenocytes	99.2327	Male Oenocytes	43.077		FALSE	FALSE	FALSE
Anogam_AGAP001351	0.37892020861515	1.16724286881863	0.324628420303529	0.74546231492114	0.933639940509233	Female vs Male Oenocytes	Female Oenocytes	38.7179	Male Oenocytes	29.8705		FALSE	FALSE	FALSE
Anogam_AGAP001352	0.0474665970941061	1.79308788099421	0.026471985894962	0.978880877783353	NA	Female vs Male Oenocytes	Female Oenocytes	4.47186	Male Oenocytes	4.51429		FALSE	FALSE	FALSE
Anogam_AGAP001353	-6.52699250501884	2.64047481606259	-2.47190106313975	0.0134396705061213	0.117493201950421	Female vs Male Oenocytes	Female Oenocytes	0	Male Oenocytes	20.5962		FALSE	FALSE	FALSE
Anogam_AGAP001354	-4.42113685559308	3.70097772458212	-1.19458618359889	0.232248750009174	NA	Female vs Male Oenocytes	Female Oenocytes	0	Male Oenocytes	4.79076		FALSE	FALSE	FALSE
Anogam_AGAP001355	-1.88346741909678	4.06165474294612	-0.463719232258183	0.642848916282631	NA	Female vs Male Oenocytes	Female Oenocytes	0	Male Oenocytes	0.732935		FALSE	FALSE	FALSE
Anogam_AGAP001356	-0.170021468882497	0.671769710039149	-0.253094872158777	0.800194901334537	0.952642291231842	Female vs Male Oenocytes	Female Oenocytes	107.881	Male Oenocytes	123.709	ACE1 Acetylcholinesterase	FALSE	FALSE	FALSE
Anogam_AGAP001357	-0.0427678971365312	0.352774077684838	-0.12123310595043	0.903506402741955	0.979369865713125	Female vs Male Oenocytes	Female Oenocytes	279.709	Male Oenocytes	298.508	beta-catenin-like protein 1	FALSE	FALSE	FALSE
Anogam_AGAP001358	0.150775604577829	0.414525886538218	0.363730250568871	0.716059451728628	0.923767040515074	Female vs Male Oenocytes	Female Oenocytes	287.316	Male Oenocytes	263.347		FALSE	FALSE	FALSE
Anogam_AGAP001360	2.44675509452165	1.15044324126077	2.12679340168078	0.0334372527917231	0.20797169217029	Female vs Male Oenocytes	Female Oenocytes	132.234	Male Oenocytes	25.6814		FALSE	FALSE	FALSE
Anogam_AGAP001361	0.103528219595219	0.509204754333828	0.203313536871156	0.838889975595321	0.962816618833558	Female vs Male Oenocytes	Female Oenocytes	168.565	Male Oenocytes	162.267	WD repeat-containing protein	FALSE	FALSE	FALSE
Anogam_AGAP001362	0.0840831646698919	0.39723953719744	0.211668670402513	0.832365531659643	0.959742626803427	Female vs Male Oenocytes	Female Oenocytes	316.574	Male Oenocytes	305.16	polyadenylation factor subunit 2	FALSE	FALSE	FALSE
Anogam_AGAP001363	-0.0130482362486941	0.28660363461157	-0.0455271136612703	0.963687163723574	0.992834668896308	Female vs Male Oenocytes	Female Oenocytes	284.95	Male Oenocytes	295.986	cohesin loading complex subunit SCC4 homolog	FALSE	FALSE	FALSE
Anogam_AGAP001364	0.235755248205355	0.334621476791829	0.704543086910172	0.481094627255347	0.818920200399614	Female vs Male Oenocytes	Female Oenocytes	492.975	Male Oenocytes	433.179	Ubiquitin-fold modifier 1	FALSE	FALSE	FALSE
Anogam_AGAP001365	-0.605967821615107	0.649640036832174	-0.932774747951149	0.350936281861062	0.724652124537067	Female vs Male Oenocytes	Female Oenocytes	155.25	Male Oenocytes	241.208		FALSE	FALSE	FALSE
Anogam_AGAP001366	0.483930431588792	0.874397205915871	0.553444622552182	0.579958990601291	0.862690058231067	Female vs Male Oenocytes	Female Oenocytes	314.98	Male Oenocytes	232.566		FALSE	FALSE	FALSE
Anogam_AGAP001367	0.464815796145811	0.366125650168778	1.26955266841189	0.204244018361506	0.574616292741687	Female vs Male Oenocytes	Female Oenocytes	2550.63	Male Oenocytes	1879.63	beta-12C3-glucuronyltransferase	FALSE	FALSE	FALSE
Anogam_AGAP001368	0.239390428971744	0.376135827271684	0.636446761022932	0.524485270930732	0.841356831211049	Female vs Male Oenocytes	Female Oenocytes	793.35	Male Oenocytes	686.513		FALSE	FALSE	FALSE
Anogam_AGAP001369	0.933386443788143	0.937757036571727	0.995339312195873	0.319571263944005	0.69889473068863	Female vs Male Oenocytes	Female Oenocytes	43.944	Male Oenocytes	23.6127		FALSE	FALSE	FALSE
Anogam_AGAP001370	-0.709679190832101	0.626844072048902	-1.13214629040432	0.257572936236869	0.637445905298183	Female vs Male Oenocytes	Female Oenocytes	869.65	Male Oenocytes	1491.17	Ras association domain-containing protein 7-8	FALSE	FALSE	FALSE
Anogam_AGAP001371	0.684092104037173	0.753677893306175	0.9076717124291	0.364051693557357	0.735581709585257	Female vs Male Oenocytes	Female Oenocytes	112.085	Male Oenocytes	73.3641	D-tyrosyl-tRNA(Tyr) deacylase	FALSE	FALSE	FALSE
Anogam_AGAP001372	0.499179680859497	0.706631625215906	0.706421370126162	0.47992613509853	0.818276933554058	Female vs Male Oenocytes	Female Oenocytes	1536.35	Male Oenocytes	1091.27		FALSE	FALSE	FALSE
Anogam_AGAP001373	-0.220761562587683	0.433655091863774	-0.509071764011552	0.610701922710044	0.878911871329066	Female vs Male Oenocytes	Female Oenocytes	96.6375	Male Oenocytes	115.766	Inhibitor of growth protein	FALSE	FALSE	FALSE
Anogam_AGAP001374	4.15815928378965	3.71842282063805	1.11825886521322	0.26345644982882	NA	Female vs Male Oenocytes	Female Oenocytes	4.45187	Male Oenocytes	0	trio TRIO salivary gland protein	FALSE	FALSE	FALSE
Anogam_AGAP001375	0.0454220814337474	1.06079216313654	0.0428190205510605	0.965845801686958	0.993361316512332	Female vs Male Oenocytes	Female Oenocytes	18.0988	Male Oenocytes	18.3074	SRPN12 serine protease inhibitor (serpin) 12	FALSE	FALSE	FALSE
Anogam_AGAP001376	-1.93733831281563	0.436377414328026	-4.43959345558459	9.01289706856067e-06	0.000443068795022577	Female vs Male Oenocytes	Female Oenocytes	953.95	Male Oenocytes	3729.7	SRPN17 serine protease inhibitor (serpin) 17	FALSE	TRUE	TRUE
Anogam_AGAP001377	-1.08109304093252	0.336691620865925	-3.21092944977988	0.00132306412580092	0.0243023475526176	Female vs Male Oenocytes	Female Oenocytes	7159.85	Male Oenocytes	15699	SRPN11 serine protease inhibitor (serpin) 11	FALSE	FALSE	FALSE
Anogam_AGAP001379	-0.226221001072141	0.728265475691789	-0.310629857686513	0.756082026161811	0.936882568620485	Female vs Male Oenocytes	Female Oenocytes	29.5761	Male Oenocytes	36.2608	GPRCCK2 putative gastrin-cholecystokinin receptor 2	FALSE	FALSE	FALSE
Anogam_AGAP001380	0.437039022871205	0.333956762682209	1.30866947972869	0.190646334337482	0.555756978365652	Female vs Male Oenocytes	Female Oenocytes	1038.42	Male Oenocytes	788.476	translation initiation factor 6	FALSE	FALSE	FALSE
Anogam_AGAP001381	1.41925033957734	0.607981214550792	2.33436544684354	0.0195765944597984	0.150111619090535	Female vs Male Oenocytes	Female Oenocytes	18057.9	Male Oenocytes	6783.64	laminin2C beta 1	FALSE	FALSE	FALSE
Anogam_AGAP001382	0.133636978008523	0.985065046475259	0.135663100103592	0.892087619817442	0.9749633357601	Female vs Male Oenocytes	Female Oenocytes	3267.92	Male Oenocytes	2960.14	DH31 diuretic hormone 31	FALSE	FALSE	FALSE
Anogam_AGAP001384	-0.258912955770074	0.396556009042161	-0.652903877047408	0.513818249338831	0.836316114499765	Female vs Male Oenocytes	Female Oenocytes	103.345	Male Oenocytes	128.009	protein kinase A	FALSE	FALSE	FALSE
Anogam_AGAP001386	0.439394151845669	0.359653757437048	1.22171433708037	0.221815672622422	0.598567033838706	Female vs Male Oenocytes	Female Oenocytes	385.218	Male Oenocytes	290.661	remodeling and spacing factor 1	FALSE	FALSE	FALSE
Anogam_AGAP001387	1.0417583973754	0.300071237908917	3.47170360156815	0.000517166995385567	0.0120152770434784	Female vs Male Oenocytes	Female Oenocytes	936.846	Male Oenocytes	468.469		FALSE	FALSE	FALSE
Anogam_AGAP001388	-3.81410091358291	1.22546007414793	-3.11238284628317	0.00185583656227194	0.031739483794419	Female vs Male Oenocytes	Female Oenocytes	3.39771	Male Oenocytes	48.1632		FALSE	FALSE	FALSE
Anogam_AGAP001389	-3.88633084417005	3.94636757758861	-0.984786836948615	0.324728787652096	NA	Female vs Male Oenocytes	Female Oenocytes	0	Male Oenocytes	3.18362	homeobox protein HEX	FALSE	FALSE	FALSE
Anogam_AGAP001390	0.0890639305678078	0.860485004521261	0.10350433778606	0.917562706931882	0.98241610505231	Female vs Male Oenocytes	Female Oenocytes	167.908	Male Oenocytes	166.108		FALSE	FALSE	FALSE
Anogam_AGAP001391	0.271609094242384	0.426004751556583	0.637572922015421	0.523751726901001	0.84130979841272	Female vs Male Oenocytes	Female Oenocytes	439.545	Male Oenocytes	371.662	tetracycline transporter	FALSE	FALSE	FALSE
Anogam_AGAP001392	0.285604043237199	0.746751889886933	0.382461761536945	0.702118886771881	0.91787792803066	Female vs Male Oenocytes	Female Oenocytes	704.501	Male Oenocytes	579.265		FALSE	FALSE	FALSE
Anogam_AGAP001393	-0.468172397038567	0.445843329003577	-1.05008276805418	0.293680060610396	0.674145792188448	Female vs Male Oenocytes	Female Oenocytes	52.3983	Male Oenocytes	74.1079	Sgf11 SAGA-associated factor 11 homolog	FALSE	FALSE	FALSE
Anogam_AGAP001394	-0.00742725789818767	0.320101710758828	-0.0232028060099421	0.981488500338915	0.996360723191779	Female vs Male Oenocytes	Female Oenocytes	1523.46	Male Oenocytes	1584.9	synaptosomal-associated protein2C 23kDa	FALSE	FALSE	FALSE
Anogam_AGAP001395	-1.35295099467861	0.693127853097262	-1.9519501180524	0.050944127147055	0.26763419610141	Female vs Male Oenocytes	Female Oenocytes	18.9211	Male Oenocytes	50.2228	Protease2C serine	FALSE	FALSE	FALSE
Anogam_AGAP001396	0.10858844769944	0.253398157757892	0.428528954828435	0.668266057586188	0.904495868562494	Female vs Male Oenocytes	Female Oenocytes	679.315	Male Oenocytes	647.817	inositol monophosphatase 3	FALSE	FALSE	FALSE
Anogam_AGAP001397	-0.0239201620248298	0.802145002485978	-0.0298202469013673	0.976210411254213	0.994878767020374	Female vs Male Oenocytes	Female Oenocytes	29.331	Male Oenocytes	30.3913	zinc metalloproteinase YIL108W	FALSE	FALSE	FALSE
Anogam_AGAP001398	-0.921451335346501	0.960237470788334	-0.959607767222424	0.337252658417048	0.712006956542772	Female vs Male Oenocytes	Female Oenocytes	22.5282	Male Oenocytes	43.2338		FALSE	FALSE	FALSE
Anogam_AGAP001399	0.0283526265573721	0.28700152192949	0.0987891157048905	0.921305710627435	0.983757283456955	Female vs Male Oenocytes	Female Oenocytes	1147.63	Male Oenocytes	1152.86	Coatomer subunit beta	FALSE	FALSE	FALSE
Anogam_AGAP001400	0.0813042599484179	0.284619301952031	0.285659684324996	0.77513878574054	0.943192514478255	Female vs Male Oenocytes	Female Oenocytes	159.325	Male Oenocytes	154.678		FALSE	FALSE	FALSE
Anogam_AGAP001401	-0.113526168331317	0.294343265410051	-0.385693106221279	0.699723968991925	0.916416393848716	Female vs Male Oenocytes	Female Oenocytes	186.222	Male Oenocytes	207.652	optic atrophy 3 family protein	FALSE	FALSE	FALSE
Anogam_AGAP001402	-0.0751127266974043	0.435329758434446	-0.172542136718446	0.863011337746865	0.965980865262181	Female vs Male Oenocytes	Female Oenocytes	876.495	Male Oenocytes	960.158	CAS1 domain-containing protein 1	FALSE	FALSE	FALSE
Anogam_AGAP001403	0.646010617369267	0.309562872318896	2.08684785914436	0.0369018893716514	0.220630802729686	Female vs Male Oenocytes	Female Oenocytes	183.917	Male Oenocytes	121.407	protein Mpv17	FALSE	FALSE	FALSE
Anogam_AGAP001404	-0.165957391069987	0.40314414302319	-0.411657700953975	0.680590332625667	0.909794033789489	Female vs Male Oenocytes	Female Oenocytes	123.265	Male Oenocytes	142.397	DNA polymerase eta	FALSE	FALSE	FALSE
Anogam_AGAP001405	-0.835737604231972	0.343657242178676	-2.43189289110762	0.0150201482847916	0.126842347673062	Female vs Male Oenocytes	Female Oenocytes	111.976	Male Oenocytes	205.462	Retinol dehydrogenase 13 (all-trans and 9-cis)	FALSE	FALSE	FALSE
Anogam_AGAP001406	0.829749154258925	0.373805623961524	2.21973427115782	0.0264368110152473	0.181496594839299	Female vs Male Oenocytes	Female Oenocytes	363.133	Male Oenocytes	208.98	wuho tRNA (guanine-N(7)-)-methyltransferase subunit wuho	FALSE	FALSE	FALSE
Anogam_AGAP001407	-0.295141533067162	0.447164301273284	-0.66002928280893	0.509235037937346	0.833822860098804	Female vs Male Oenocytes	Female Oenocytes	1458.52	Male Oenocytes	1863.79	26S proteasome regulatory subunit T4	FALSE	FALSE	FALSE
Anogam_AGAP001408	0.776210691451068	0.255099375954548	3.04277769612956	0.00234405427669418	0.0378020543892869	Female vs Male Oenocytes	Female Oenocytes	3209.37	Male Oenocytes	1937.35	RpL35 60S ribosomal protein L35	FALSE	FALSE	FALSE
Anogam_AGAP001409	1.13192569538608	3.83746554214751	0.294966999170145	0.768019089530143	NA	Female vs Male Oenocytes	Female Oenocytes	3.44974	Male Oenocytes	1.63312	OBP3 odorant-binding protein antennal 3	FALSE	FALSE	FALSE
Anogam_AGAP001410	0.748633241519497	1.00701598644396	0.743417434874218	0.457228991910353	0.803756750760575	Female vs Male Oenocytes	Female Oenocytes	33.7423	Male Oenocytes	20.4981	Sidestep protein	FALSE	FALSE	FALSE
Anogam_AGAP001411	-0.247784180642514	0.28643507399007	-0.865062288604726	0.387004601709988	0.753986337611418	Female vs Male Oenocytes	Female Oenocytes	1034.37	Male Oenocytes	1256.08	BCL2-adenovirus E1B 19 kDa protein-interacting protein 3	FALSE	FALSE	FALSE
Anogam_AGAP001412	-3.95885301221873	1.89404260742726	-2.09016048355753	0.0366033859558782	0.219850189051793	Female vs Male Oenocytes	Female Oenocytes	1.44223	Male Oenocytes	23.1822	Hedgehog protein	FALSE	FALSE	FALSE
Anogam_AGAP001413	-1.20840788499651	1.43394057793494	-0.842718243413386	0.399386041627178	NA	Female vs Male Oenocytes	Female Oenocytes	4.20951	Male Oenocytes	9.85016		FALSE	FALSE	FALSE
Anogam_AGAP001414	0.512566102525214	0.451113904454526	1.13622324087969	0.255863146194349	0.635610191869274	Female vs Male Oenocytes	Female Oenocytes	318.663	Male Oenocytes	231.247	WD40 repeat-containing protein SMU1	FALSE	FALSE	FALSE
Anogam_AGAP001415	0.452872533175643	0.578431630492485	0.782931826860956	0.433667146543013	0.787822259833124	Female vs Male Oenocytes	Female Oenocytes	66.8035	Male Oenocytes	49.8325		FALSE	FALSE	FALSE
Anogam_AGAP001416	-9.53357481522761	1.53377294389698	-6.21576671642473	5.10746371186267e-10	1.10582022833861e-07	Female vs Male Oenocytes	Female Oenocytes	0	Male Oenocytes	161.598	EF-hand calcium-binding domain-containing protein 1	FALSE	TRUE	TRUE
Anogam_AGAP001417	0.126133751048703	0.261088992139397	0.483106353949076	0.629020222744961	0.888620192003968	Female vs Male Oenocytes	Female Oenocytes	541.936	Male Oenocytes	513.279	Brain protein 44-like protein	FALSE	FALSE	FALSE
Anogam_AGAP001418	0.361472125211577	0.505223994238404	0.715469038156978	0.47431926602009	0.814715624298161	Female vs Male Oenocytes	Female Oenocytes	377.677	Male Oenocytes	298.961		FALSE	FALSE	FALSE
Anogam_AGAP001419	-0.168460962577914	0.296699686700055	-0.567782745076564	0.57018249767539	0.859013452808212	Female vs Male Oenocytes	Female Oenocytes	4123.19	Male Oenocytes	4733.01		FALSE	FALSE	FALSE
Anogam_AGAP001420	-0.415996515336341	0.346842983122475	-1.19937993725953	0.230380245117304	0.606346795377437	Female vs Male Oenocytes	Female Oenocytes	1551.52	Male Oenocytes	2147.17	22C3-bisphosphoglycerate-dependent phosphoglycerate mutase	FALSE	FALSE	FALSE
Anogam_AGAP001421	1.140324095555	0.509764459053586	2.23696272916338	0.0252887760872696	0.177108455240231	Female vs Male Oenocytes	Female Oenocytes	288.283	Male Oenocytes	133.392	replication factor A1	FALSE	FALSE	FALSE
Anogam_AGAP001422	0.61093642573449	0.653924381029193	0.934261580479619	0.350168977248632	0.723870726640169	Female vs Male Oenocytes	Female Oenocytes	85.0504	Male Oenocytes	57.4397		FALSE	FALSE	FALSE
Anogam_AGAP001423	2.16669619285225	0.594224693200327	3.64625741347609	0.000266087435456056	0.00703300193039175	Female vs Male Oenocytes	Female Oenocytes	2286.18	Male Oenocytes	517.994	Bifunctional purine biosynthesis protein	FALSE	FALSE	FALSE
Anogam_AGAP001424	-1.07887483374841	0.263542336005488	-4.09374391265144	4.24463107764799e-05	0.00157640021336299	Female vs Male Oenocytes	Female Oenocytes	13752.3	Male Oenocytes	29780	heat shock protein 90kDa beta	FALSE	FALSE	FALSE
Anogam_AGAP001425	-0.735240655455102	0.596801877431463	-1.23196773210476	0.21796113803302	0.593520884650537	Female vs Male Oenocytes	Female Oenocytes	59.6311	Male Oenocytes	103.581	Sulfotransferase (Sult)	FALSE	FALSE	FALSE
Anogam_AGAP001426	0.0908983075948773	0.410719764880849	0.221314666025988	0.824847431265345	0.957523096116376	Female vs Male Oenocytes	Female Oenocytes	113.725	Male Oenocytes	110.822		FALSE	FALSE	FALSE
Anogam_AGAP001427	-0.947297937092	0.468198673305565	-2.02328197643942	0.0430440840366448	0.240741838981708	Female vs Male Oenocytes	Female Oenocytes	402.929	Male Oenocytes	806.445		FALSE	FALSE	FALSE
Anogam_AGAP001428	0.114052570206668	0.464745360718301	0.24540873314021	0.806139967664893	0.953834819393837	Female vs Male Oenocytes	Female Oenocytes	152.873	Male Oenocytes	145.871		FALSE	FALSE	FALSE
Anogam_AGAP001429	-0.269360963138097	0.593354860490899	-0.453962680806637	0.649855687564951	0.898130038932628	Female vs Male Oenocytes	Female Oenocytes	84.7664	Male Oenocytes	106.463		FALSE	FALSE	FALSE
Anogam_AGAP001430	-1.70559091581666	0.38298854350188	-4.45337320072681	8.45316373010079e-06	0.000421663696654439	Female vs Male Oenocytes	Female Oenocytes	739.034	Male Oenocytes	2488.24		FALSE	TRUE	TRUE
Anogam_AGAP001432	-0.271594313707189	0.449452937375915	-0.60427753635979	0.545659138609367	0.846695241611607	Female vs Male Oenocytes	Female Oenocytes	135.405	Male Oenocytes	169.589		FALSE	FALSE	FALSE
Anogam_AGAP001433	-0.852932986366279	1.33609368760433	-0.638378127431786	0.52322756549336	NA	Female vs Male Oenocytes	Female Oenocytes	3.70105	Male Oenocytes	6.701	CLIPD3 CLIP-domain serine protease	FALSE	FALSE	FALSE
Anogam_AGAP001434	-0.729511566254997	1.06677937170518	-0.683844837652718	0.49407314994058	0.8270584592524	Female vs Male Oenocytes	Female Oenocytes	39.8449	Male Oenocytes	66.5256	glutamate receptor2C anionic	FALSE	FALSE	FALSE
Anogam_AGAP001435	0.255650706027719	0.537527269551743	0.475605091144329	0.634355747642817	0.891441556055284	Female vs Male Oenocytes	Female Oenocytes	193.836	Male Oenocytes	164.585	pyrazinamidase-nicotinamidase	FALSE	FALSE	FALSE
Anogam_AGAP001438	-0.179857737270746	0.276924520946697	-0.649482886729867	0.516026304326384	0.837233896202021	Female vs Male Oenocytes	Female Oenocytes	954.892	Male Oenocytes	1111.24		FALSE	FALSE	FALSE
Anogam_AGAP001439	-1.23396113827818	4.0804728567969	-0.302406407684529	0.762342270655386	NA	Female vs Male Oenocytes	Female Oenocytes	0	Male Oenocytes	0.391681		FALSE	FALSE	FALSE
Anogam_AGAP001440	-0.290926485443809	0.38682236598123	-0.752093237178344	0.451994990625378	0.800470070414871	Female vs Male Oenocytes	Female Oenocytes	3248.17	Male Oenocytes	4123.22	Proteasome 26S non-ATPase subunit 11	FALSE	FALSE	FALSE
Anogam_AGAP001441	-0.725669227217055	0.278869945113511	-2.60217796837762	0.00926337674507445	0.0938799272413543	Female vs Male Oenocytes	Female Oenocytes	356.27	Male Oenocytes	609.476		FALSE	FALSE	FALSE
Anogam_AGAP001442	0.251977590968645	0.359631603973296	0.700654748316711	0.483518502689789	0.821073349669135	Female vs Male Oenocytes	Female Oenocytes	204.848	Male Oenocytes	177.708	Brain protein 16	FALSE	FALSE	FALSE
Anogam_AGAP001443	0.824545033852228	1.06987172344081	0.770695229892056	0.440887600005071	0.793644475084309	Female vs Male Oenocytes	Female Oenocytes	18.1632	Male Oenocytes	10.5437	CYP325J1 cytochrome P450	FALSE	FALSE	FALSE
Anogam_AGAP001444	-0.986601738077067	0.785613236719858	-1.2558364497477	0.209175273307981	0.581168049381315	Female vs Male Oenocytes	Female Oenocytes	44.1222	Male Oenocytes	88.0503		FALSE	FALSE	FALSE
Anogam_AGAP001445	-0.0636086267127742	0.977409088244374	-0.065078816513798	0.948111246645034	0.989727869313276	Female vs Male Oenocytes	Female Oenocytes	10.1216	Male Oenocytes	11.0584		FALSE	FALSE	FALSE
Anogam_AGAP001446	-0.198099772518757	0.334306414017312	-0.59256946385868	0.553469320082974	0.850385595827321	Female vs Male Oenocytes	Female Oenocytes	435.475	Male Oenocytes	509.666	AMP-activated protein kinase2C gamma regulatory subunit	FALSE	FALSE	FALSE
Anogam_AGAP001447	0.0161855591440664	0.222373994954092	0.0727853054373909	0.941976964501234	0.988152293646708	Female vs Male Oenocytes	Female Oenocytes	1622.69	Male Oenocytes	1654.46	solute carrier family 35 (UDP-galactose transporter)2C member B1	FALSE	FALSE	FALSE
Anogam_AGAP001448	-5.27602444143465	2.65910880681522	-1.98413258905102	0.0472410609852797	0.254891323746663	Female vs Male Oenocytes	Female Oenocytes	0.366423	Male Oenocytes	15.6716	pancreas-specific transcription factor 1a	FALSE	FALSE	FALSE
Anogam_AGAP001449	-1.36219278762661	0.945547044768715	-1.44063988689194	0.149686445707417	0.487496402146317	Female vs Male Oenocytes	Female Oenocytes	21.2317	Male Oenocytes	56.4686		FALSE	FALSE	FALSE
Anogam_AGAP001450	-0.0948619770465676	0.309199788699139	-0.306798324299216	0.758996883809673	0.937893417079203	Female vs Male Oenocytes	Female Oenocytes	235.326	Male Oenocytes	258.312	ELMO domain-containing protein 2	FALSE	FALSE	FALSE
Anogam_AGAP001451	-0.470315350396145	0.343421348680333	-1.36949945658133	0.170843204552012	0.525879811371169	Female vs Male Oenocytes	Female Oenocytes	141.695	Male Oenocytes	201.627		FALSE	FALSE	FALSE
Anogam_AGAP001452	-0.0932928937173336	0.264512716346326	-0.352697197344514	0.724315460705339	0.927226151644673	Female vs Male Oenocytes	Female Oenocytes	471.743	Male Oenocytes	517.189	ubiquitin-conjugating enzyme E2 Q	FALSE	FALSE	FALSE
Anogam_AGAP001453	2.61854694726465	0.801265993157281	3.26801208291221	0.00108305741730244	0.0208340118685625	Female vs Male Oenocytes	Female Oenocytes	50.6128	Male Oenocytes	8.40409		FALSE	FALSE	FALSE
Anogam_AGAP001454	0.366351562220432	0.31313069979144	1.16996373228316	0.242015564263279	0.618626069315029	Female vs Male Oenocytes	Female Oenocytes	190.797	Male Oenocytes	151.562		FALSE	FALSE	FALSE
Anogam_AGAP001455	-0.0510746510727693	0.363172089697393	-0.140634846458951	0.888158418314155	0.973701795385137	Female vs Male Oenocytes	Female Oenocytes	652.131	Male Oenocytes	691.012		FALSE	FALSE	FALSE
Anogam_AGAP001458	0.832294299168744	0.533560851836336	1.55988636779529	0.11878673651761	0.43185917499221	Female vs Male Oenocytes	Female Oenocytes	161.643	Male Oenocytes	94.2933	mono-ADP-ribosyltransferase sirtuin 6	FALSE	FALSE	FALSE
Anogam_AGAP001459	0.794301704445674	0.219456589952313	3.61940238212154	0.00029528417586498	0.00764583148499247	Female vs Male Oenocytes	Female Oenocytes	5895.91	Male Oenocytes	3509.04	RpL17 60S ribosomal protein L17	FALSE	FALSE	FALSE
Anogam_AGAP001460	0.199084328047161	0.280780047610927	0.709040153462146	0.478299559535205	0.817188770622942	Female vs Male Oenocytes	Female Oenocytes	224.067	Male Oenocytes	200.753		FALSE	FALSE	FALSE
Anogam_AGAP001461	0.0631915873301218	0.272069123089112	0.2322629874814	0.816333758118093	0.956511189510464	Female vs Male Oenocytes	Female Oenocytes	526.828	Male Oenocytes	517.301	JNK1-MAPK8-associated membrane protein	FALSE	FALSE	FALSE
Anogam_AGAP001462	-0.460607387505249	0.414173539181644	-1.11211205915122	0.266089972400233	0.646036453823057	Female vs Male Oenocytes	Female Oenocytes	122.641	Male Oenocytes	172.75		FALSE	FALSE	FALSE
Anogam_AGAP001463	0.388125555592002	0.448565705248518	0.8652590937084	0.386896597408625	0.753937145773681	Female vs Male Oenocytes	Female Oenocytes	130.151	Male Oenocytes	103.242		FALSE	FALSE	FALSE
Anogam_AGAP001464	-0.122698063028326	0.333478281231122	-0.367934195220614	0.712922301902011	0.923106927618637	Female vs Male Oenocytes	Female Oenocytes	1068.72	Male Oenocytes	1188.8	cyclic AMP-responsive element-binding protein 3	FALSE	FALSE	FALSE
Anogam_AGAP001466	-0.410898569123441	0.614558122785522	-0.668608149317135	0.503745472747157	0.831621338526131	Female vs Male Oenocytes	Female Oenocytes	84.8249	Male Oenocytes	115.546		FALSE	FALSE	FALSE
Anogam_AGAP001467	0.245189289243811	0.428528034909101	0.572166274479149	0.567209333289247	0.857640739309268	Female vs Male Oenocytes	Female Oenocytes	494.625	Male Oenocytes	425.802		FALSE	FALSE	FALSE
Anogam_AGAP001468	-0.800037894229121	0.302233148834091	-2.64708850539851	0.00811881013333308	0.0853481528066089	Female vs Male Oenocytes	Female Oenocytes	1863.56	Male Oenocytes	3346.99		FALSE	FALSE	FALSE
Anogam_AGAP001469	0.0439637832367226	0.448105120160009	0.0981104237796346	0.921844610482525	0.9841261808928	Female vs Male Oenocytes	Female Oenocytes	105.021	Male Oenocytes	104.146	Protein tyrosine phosphatase2C receptor type2C f polypeptide (PTPRF) interacting protein (liprin)	FALSE	FALSE	FALSE
Anogam_AGAP001470	1.35083478447913	0.739163714763966	1.82751771697896	0.0676219648438625	0.315362563818123	Female vs Male Oenocytes	Female Oenocytes	9411.44	Male Oenocytes	3695.37		FALSE	FALSE	FALSE
Anogam_AGAP001471	0.0460030645356481	0.403492049733218	0.114012319613397	0.909228027487967	0.980636397214367	Female vs Male Oenocytes	Female Oenocytes	497.869	Male Oenocytes	491.258	3-phosphoinositide dependent protein kinase-1	FALSE	FALSE	FALSE
Anogam_AGAP001472	-0.353553939536038	0.343360300001128	-1.02968788044185	0.303156546640847	0.684017964216688	Female vs Male Oenocytes	Female Oenocytes	541.052	Male Oenocytes	709.165		FALSE	FALSE	FALSE
Anogam_AGAP001473	-0.566236438872718	0.77149438927036	-0.733947578553664	0.462980687875598	0.806325425505616	Female vs Male Oenocytes	Female Oenocytes	15219.4	Male Oenocytes	23729.8	propionyl-CoA synthetase	FALSE	FALSE	FALSE
Anogam_AGAP001474	-1.14654310835437	1.1635250332462	-0.985404761903183	0.324425291540905	0.702773080653996	Female vs Male Oenocytes	Female Oenocytes	142.739	Male Oenocytes	325.592	MSN myosuppressin	FALSE	FALSE	FALSE
Anogam_AGAP001475	-0.00491204879040493	0.325923926619281	-0.0150711512387454	0.987975416324657	0.997186851469918	Female vs Male Oenocytes	Female Oenocytes	346.186	Male Oenocytes	357.33		FALSE	FALSE	FALSE
Anogam_AGAP001476	-0.697017558487666	0.718882254073914	-0.969585150471665	0.332253317680217	0.707916616564885	Female vs Male Oenocytes	Female Oenocytes	330.039	Male Oenocytes	556.575	Innexin inx2	FALSE	FALSE	FALSE
Anogam_AGAP001477	-3.34936701292229	3.1202015461917	-1.07344572564881	0.283071177871104	0.664635972777192	Female vs Male Oenocytes	Female Oenocytes	25.3907	Male Oenocytes	250.014	Innexin inx2	FALSE	FALSE	FALSE
Anogam_AGAP001478	0.549999957016192	0.887291541023653	0.619863857128251	0.535347422820161	0.844225225789751	Female vs Male Oenocytes	Female Oenocytes	73.2867	Male Oenocytes	51.1189	NMDAR1 ionotropic receptor NMDAR1	FALSE	FALSE	FALSE
Anogam_AGAP001480	-0.378616998776214	0.448383188062529	-0.844404984076733	0.398443138207459	0.762714954787443	Female vs Male Oenocytes	Female Oenocytes	801.577	Male Oenocytes	1081.2		FALSE	FALSE	FALSE
Anogam_AGAP001481	-0.645591759070903	0.351764938982513	-1.83529308218804	0.0664622755285972	0.311550638014955	Female vs Male Oenocytes	Female Oenocytes	184.009	Male Oenocytes	294.086	biotin--protein ligase	FALSE	FALSE	FALSE
Anogam_AGAP001482	-0.0494737994972684	0.454152967212914	-0.108936422458899	0.913252917595341	0.981496315869193	Female vs Male Oenocytes	Female Oenocytes	173.145	Male Oenocytes	183.227		FALSE	FALSE	FALSE
Anogam_AGAP001483	-0.254831473548659	0.920728472145614	-0.276771579524215	0.781955505236308	0.946936574141793	Female vs Male Oenocytes	Female Oenocytes	28.288	Male Oenocytes	34.4225		FALSE	FALSE	FALSE
Anogam_AGAP001484	-0.194346845355347	0.313914149089587	-0.619108268674705	0.53584503648173	0.844225225789751	Female vs Male Oenocytes	Female Oenocytes	769.505	Male Oenocytes	906.144	AP-3 complex subunit mu	FALSE	FALSE	FALSE
Anogam_AGAP001485	-1.75085422080517	1.83668486862112	-0.953268712949985	0.340453939410148	0.714763624393988	Female vs Male Oenocytes	Female Oenocytes	10.994	Male Oenocytes	38.7652		FALSE	FALSE	FALSE
Anogam_AGAP001486	1.59290310818518	1.03459551720885	1.53963851736235	0.123648491178948	0.440986133718056	Female vs Male Oenocytes	Female Oenocytes	173.451	Male Oenocytes	60.2373		FALSE	FALSE	FALSE
Anogam_AGAP001487	-0.223667272348531	1.26386377122656	-0.176971029188902	0.859531145730054	0.965980865262181	Female vs Male Oenocytes	Female Oenocytes	20.504	Male Oenocytes	24.3001	shakB Innexin shaking-B	FALSE	FALSE	FALSE
Anogam_AGAP001488	0.40944109536906	0.436051886119824	0.938973338729115	0.347744433066138	0.721583880685362	Female vs Male Oenocytes	Female Oenocytes	320.245	Male Oenocytes	245.624	innexin 2	FALSE	FALSE	FALSE
Anogam_AGAP001490	-0.426016872694843	0.425357924120428	-1.00154916256886	0.316561384590983	0.696503491804939	Female vs Male Oenocytes	Female Oenocytes	845.267	Male Oenocytes	1180.84	26S proteasome non-ATPase regulatory subunit 5	FALSE	FALSE	FALSE
Anogam_AGAP001491	0.114496498842926	0.486394058429503	0.235398637912271	0.813899343164699	0.956047525804453	Female vs Male Oenocytes	Female Oenocytes	224.219	Male Oenocytes	215.579	Leucine-rich repeat-containing protein 57	FALSE	FALSE	FALSE
Anogam_AGAP001492	-0.247250616129251	0.530027512061388	-0.466486381372245	0.640867393410575	0.894690215822352	Female vs Male Oenocytes	Female Oenocytes	1049.89	Male Oenocytes	1303.09		FALSE	FALSE	FALSE
Anogam_AGAP001493	0.208161919579695	1.91239919475069	0.108848571025901	0.913322598546685	NA	Female vs Male Oenocytes	Female Oenocytes	2.56556	Male Oenocytes	2.28507		FALSE	FALSE	FALSE
Anogam_AGAP001495	-0.243446612339066	1.80269034229451	-0.135046273132634	0.892575288738291	NA	Female vs Male Oenocytes	Female Oenocytes	2.98064	Male Oenocytes	3.74551	homeobox protein Unc-4	FALSE	FALSE	FALSE
Anogam_AGAP001496	0.128899929417184	0.403030351854403	0.319826853794252	0.749099589583923	0.935202726488283	Female vs Male Oenocytes	Female Oenocytes	951.983	Male Oenocytes	885.919		FALSE	FALSE	FALSE
Anogam_AGAP001497	0.487423867323124	0.429011232636697	1.13615642258927	0.25589110471013	0.635610191869274	Female vs Male Oenocytes	Female Oenocytes	620.121	Male Oenocytes	452.293	ACTN Alpha-actinin2C sarcomeric	FALSE	FALSE	FALSE
Anogam_AGAP001498	-1.7987329395828	1.03819511226644	-1.73255770358624	0.0831743125040289	0.357123124067932	Female vs Male Oenocytes	Female Oenocytes	19.9326	Male Oenocytes	70.1022	GPROPDR putative opioid receptor	FALSE	FALSE	FALSE
Anogam_AGAP001499	0.546757673838868	0.529844702239581	1.03192062037763	0.302109305248997	0.682714699136974	Female vs Male Oenocytes	Female Oenocytes	559.285	Male Oenocytes	386.468	GPRMTN putative melatonin receptor	FALSE	FALSE	FALSE
Anogam_AGAP001500	0.384274935508771	0.334522265047372	1.14872753075002	0.250668349923225	0.629982990570199	Female vs Male Oenocytes	Female Oenocytes	398.542	Male Oenocytes	315.58		FALSE	FALSE	FALSE
Anogam_AGAP001501	0.404251599404806	0.380328988303932	1.06289978370451	0.287827401128007	0.669698288270144	Female vs Male Oenocytes	Female Oenocytes	507.511	Male Oenocytes	394.784	Regucalcin protein	FALSE	FALSE	FALSE
Anogam_AGAP001502	-0.340222322817348	0.19021300161703	-1.78863863103503	0.0736730321754005	0.332018058200565	Female vs Male Oenocytes	Female Oenocytes	9174.33	Male Oenocytes	11947.1	mitochondrial 10 kDa heat shock protein	FALSE	FALSE	FALSE
Anogam_AGAP001503	-1.69149624146946	1.52235405696085	-1.11110568118843	0.266522862768908	0.646036453823057	Female vs Male Oenocytes	Female Oenocytes	15.4459	Male Oenocytes	49.625	separase	FALSE	FALSE	FALSE
Anogam_AGAP001504	-0.216503280309812	0.340165177864509	-0.636465148105335	0.524473289968239	0.841356831211049	Female vs Male Oenocytes	Female Oenocytes	186.523	Male Oenocytes	223.28		FALSE	FALSE	FALSE
Anogam_AGAP001505	-0.0280531930187366	0.348958304160122	-0.0803912464162601	0.935926088720425	0.986839071476432	Female vs Male Oenocytes	Female Oenocytes	645.459	Male Oenocytes	672.388	Transmembrane emp24 protein transport domain containing 1b	FALSE	FALSE	FALSE
Anogam_AGAP001506	0.289586378531712	0.790793320092506	0.366197299817653	0.714217856902923	0.923673960025699	Female vs Male Oenocytes	Female Oenocytes	34.1926	Male Oenocytes	28.1471	guanine nucleotide-binding protein subunit beta2C other	FALSE	FALSE	FALSE
Anogam_AGAP001507	1.63018893594541	0.613366571749505	2.65777271052712	0.00786589219997823	0.0835410875320162	Female vs Male Oenocytes	Female Oenocytes	463.077	Male Oenocytes	151.282	procollagen-lysine2C 2-oxoglutarate 5-dioxygenase	FALSE	FALSE	FALSE
Anogam_AGAP001508	3.50343296873881	1.50659902223887	2.32539177115127	NA	NA	Female vs Male Oenocytes	Female Oenocytes	505.062	Male Oenocytes	43.8523		FALSE	FALSE	FALSE
Anogam_AGAP001509	5.21307850462325	3.91752095623746	1.33070851767187	0.183284939275861	NA	Female vs Male Oenocytes	Female Oenocytes	10.4493	Male Oenocytes	0		FALSE	FALSE	FALSE
Anogam_AGAP001510	0.0383309947590983	1.40351913578454	0.0273106320974184	0.978211976845109	0.995129968646989	Female vs Male Oenocytes	Female Oenocytes	12.7289	Male Oenocytes	13.0954		FALSE	FALSE	FALSE
Anogam_AGAP001511	-0.797239699666431	1.07065352320627	-0.744629034871105	0.456496010449352	0.803372318885315	Female vs Male Oenocytes	Female Oenocytes	182.218	Male Oenocytes	319.542		FALSE	FALSE	FALSE
Anogam_AGAP001512	-0.541885682936939	0.508568312525541	-1.06551208478945	0.286644259822695	0.668569473694335	Female vs Male Oenocytes	Female Oenocytes	1734.65	Male Oenocytes	2634.52	glutamate--cysteine ligase catalytic subunit	FALSE	FALSE	FALSE
Anogam_AGAP001513	-0.271766255032204	0.459528034061543	-0.59140299369811	0.554250434995259	0.85107174083473	Female vs Male Oenocytes	Female Oenocytes	138.474	Male Oenocytes	171.313	kelch-like protein 1-4-5	FALSE	FALSE	FALSE
Anogam_AGAP001514	0.437936824480209	0.537888238972771	0.81417810011343	0.415542929423187	0.7743206097437	Female vs Male Oenocytes	Female Oenocytes	128.118	Male Oenocytes	96.9219	pre-mRNA 3-end-processing factor FIP1	FALSE	FALSE	FALSE
Anogam_AGAP001515	-1.8835329875253	1.72877727304224	-1.08951743923075	0.275925768729071	0.656493014399584	Female vs Male Oenocytes	Female Oenocytes	35.4051	Male Oenocytes	134.748		FALSE	FALSE	FALSE
Anogam_AGAP001518	0.306337684360514	0.357530758123011	0.85681491004787	0.391547184183902	0.757503099774184	Female vs Male Oenocytes	Female Oenocytes	649.718	Male Oenocytes	544.313		FALSE	FALSE	FALSE
Anogam_AGAP001519	0.0137573880801195	0.341389041996316	0.0402982708515522	0.967855332321447	0.993486986147297	Female vs Male Oenocytes	Female Oenocytes	349.662	Male Oenocytes	357.828	pre-mRNA-splicing helicase BRR2	FALSE	FALSE	FALSE
Anogam_AGAP001520	-0.110047348269512	0.580668845147864	-0.189518258451577	0.849686646223195	0.964978216171848	Female vs Male Oenocytes	Female Oenocytes	317.692	Male Oenocytes	354.006	protein phosphatase 12C regulatory (inhibitor) subunit 3	FALSE	FALSE	FALSE
Anogam_AGAP001521	-0.0229332688612857	0.393324779740786	-0.0583061887847481	0.953504737966488	0.991189830502725	Female vs Male Oenocytes	Female Oenocytes	167.864	Male Oenocytes	175.613		FALSE	FALSE	FALSE
Anogam_AGAP001522	1.55248105266968	0.54369876371732	2.8554066263738	0.00429817594561123	0.0558287045582846	Female vs Male Oenocytes	Female Oenocytes	113.498	Male Oenocytes	40.0298	Thyroid receptor-interacting protein 13	FALSE	FALSE	FALSE
Anogam_AGAP001523	0.806405888142509	0.339609905372285	2.3745063833121	0.0175724323662816	0.14024868373277	Female vs Male Oenocytes	Female Oenocytes	478.978	Male Oenocytes	279.403	ABCA7 ATP-binding cassette transporter (ABC transporter) family A member 7	FALSE	FALSE	FALSE
Anogam_AGAP001524	0.636588882813345	0.628539399505967	1.01280664873786	0.311152524312856	0.692560825952588	Female vs Male Oenocytes	Female Oenocytes	59.2849	Male Oenocytes	39.4152		FALSE	FALSE	FALSE
Anogam_AGAP001525	1.09331522627097	0.464913835784908	2.35165129991269	0.0186902868072422	0.146414440762507	Female vs Male Oenocytes	Female Oenocytes	300.531	Male Oenocytes	146.631		FALSE	FALSE	FALSE
Anogam_AGAP001526	0.274632099617618	0.227587181674001	1.20671163286782	0.227543217523008	0.602832538795661	Female vs Male Oenocytes	Female Oenocytes	1108.48	Male Oenocytes	943.486	RIO kinase 2	FALSE	FALSE	FALSE
Anogam_AGAP001527	-0.0912072956512425	0.398188010268765	-0.229055856276738	0.818825502920573	0.95702435153017	Female vs Male Oenocytes	Female Oenocytes	362.099	Male Oenocytes	392.761	golgi-specific brefeldin a-resistance factor	FALSE	FALSE	FALSE
Anogam_AGAP001528	1.09174354804409	0.653497036229401	1.67061744356687	0.0947972647833864	0.382345210636441	Female vs Male Oenocytes	Female Oenocytes	84.8085	Male Oenocytes	41.125		FALSE	FALSE	FALSE
Anogam_AGAP001529	0.972045705446256	0.436396955956228	2.22743466052902	0.0259182381086931	0.179896221348781	Female vs Male Oenocytes	Female Oenocytes	160.703	Male Oenocytes	84.1936	H-ACA ribonucleoprotein complex subunit	FALSE	FALSE	FALSE
Anogam_AGAP001530	0.264888197002168	0.762849654850207	0.347235127286229	0.728414682906127	0.928687055208059	Female vs Male Oenocytes	Female Oenocytes	62.0564	Male Oenocytes	53.5676		FALSE	FALSE	FALSE
Anogam_AGAP001531	2.15554421184288	3.99547172490486	0.539496800442057	0.589544104100909	NA	Female vs Male Oenocytes	Female Oenocytes	1.1315	Male Oenocytes	0	sodium-independent sulfate anion transporter	FALSE	FALSE	FALSE
Anogam_AGAP001532	0.559696678008426	1.6616163462553	0.33683869280041	0.736238503139814	0.930996586417858	Female vs Male Oenocytes	Female Oenocytes	9.52391	Male Oenocytes	6.66191	GPRGNR3 putative gonadotrophin releasing hormone receptor 3	FALSE	FALSE	FALSE
Anogam_AGAP001533	-0.0233667435136525	0.422746902011081	-0.0552736008294629	0.955920493491455	0.99137241641324	Female vs Male Oenocytes	Female Oenocytes	196.474	Male Oenocytes	203.385	Rab3 GTPase-activating protein regulatory subunit	FALSE	FALSE	FALSE
Anogam_AGAP001534	-3.96408127606971	1.81830211995035	-2.18010045337128	0.029250016178678	0.193363282594616	Female vs Male Oenocytes	Female Oenocytes	5.25174	Male Oenocytes	79.5328		FALSE	FALSE	FALSE
Anogam_AGAP001535	-0.100311185688058	0.431730556536723	-0.232346736104897	0.816268715312068	0.956511189510464	Female vs Male Oenocytes	Female Oenocytes	256.74	Male Oenocytes	279.958	histone-lysine N-methyltransferase ASH1L	FALSE	FALSE	FALSE
Anogam_AGAP001536	-0.361820246552174	0.379017142119985	-0.954627657547036	0.339766025488485	0.713903270457392	Female vs Male Oenocytes	Female Oenocytes	162.491	Male Oenocytes	213.391		FALSE	FALSE	FALSE
Anogam_AGAP001537	-0.946786116124724	0.910214180757719	-1.04017948318116	0.298256521633753	0.678717038162954	Female vs Male Oenocytes	Female Oenocytes	9.02618	Male Oenocytes	18.0029	chromosome transmission fidelity protein 1	FALSE	FALSE	FALSE
Anogam_AGAP001538	0.543516706051834	0.435872479702907	1.2469626584874	0.212411189863094	0.585454027098278	Female vs Male Oenocytes	Female Oenocytes	117.522	Male Oenocytes	82.7419	splicing factor 3B subunit 4	FALSE	FALSE	FALSE
Anogam_AGAP001539	0.414045557345723	0.677671408764274	0.6109827742338	0.541210984264962	0.84586533317695	Female vs Male Oenocytes	Female Oenocytes	68.0315	Male Oenocytes	52.9358	histone acetyltransferase HTATIP	FALSE	FALSE	FALSE
Anogam_AGAP001541	3.76278019900496	3.93609570612304	0.955967659310603	0.339088573935454	NA	Female vs Male Oenocytes	Female Oenocytes	3.24218	Male Oenocytes	0		FALSE	FALSE	FALSE
Anogam_AGAP001542	-0.709702787173552	3.61777951443625	-0.196170823661747	0.844476463693837	NA	Female vs Male Oenocytes	Female Oenocytes	0.715638	Male Oenocytes	1.22244		FALSE	FALSE	FALSE
Anogam_AGAP001543	NA	NA	NA	NA	NA	Female vs Male Oenocytes	Female Oenocytes	0	Male Oenocytes	0	TWDL11 cuticular protein TWDL family (TWDL11)	FALSE	FALSE	FALSE
Anogam_AGAP001544	4.52758428196126	1.42673939976041	3.17337860209199	0.00150675899233593	0.0268525035131532	Female vs Male Oenocytes	Female Oenocytes	180.695	Male Oenocytes	8.0566	tripartite motif-containing protein 37	FALSE	FALSE	FALSE
Anogam_AGAP001545	0.843661712338385	0.280547963177987	3.00719243434016	0.00263672791967518	0.0411523670408201	Female vs Male Oenocytes	Female Oenocytes	788.111	Male Oenocytes	453.561	ribosomal biogenesis protein RLP24	FALSE	FALSE	FALSE
Anogam_AGAP001546	0.119769349553071	0.731236205014986	0.163790234580379	0.869896279533721	0.968709185876029	Female vs Male Oenocytes	Female Oenocytes	27.5147	Male Oenocytes	26.0359	Neither inactivation nor afterpotential protein G	FALSE	FALSE	FALSE
Anogam_AGAP001548	-0.250714320967447	0.20012520458697	-1.25278733123539	0.210283113388908	0.582168381791953	Female vs Male Oenocytes	Female Oenocytes	1243.36	Male Oenocytes	1518.94	Stress-associated endoplasmic reticulum protein 2	FALSE	FALSE	FALSE
Anogam_AGAP001549	0.0676143325018663	0.207530737780969	0.325803942224827	0.744572695877814	0.933140020014365	Female vs Male Oenocytes	Female Oenocytes	626.207	Male Oenocytes	614.211		FALSE	FALSE	FALSE
Anogam_AGAP001550	-0.355129744421024	0.583585877161864	-0.608530395129019	0.542835753116099	0.846143724206057	Female vs Male Oenocytes	Female Oenocytes	48.1991	Male Oenocytes	63.2705	sodium-coupled monocarboxylate transporter 1	FALSE	FALSE	FALSE
Anogam_AGAP001551	0.350256347432567	0.49127511626097	0.712953568864471	0.475874489121203	0.815841805047157	Female vs Male Oenocytes	Female Oenocytes	216.494	Male Oenocytes	176.453	G patch domain and KOW motifs-containing protein	FALSE	FALSE	FALSE
Anogam_AGAP001552	-0.20130812568249	1.08163475588104	-0.186114697764603	0.852354816135996	0.964978216171848	Female vs Male Oenocytes	Female Oenocytes	12.5005	Male Oenocytes	15.1358	juvenile hormone-inducible protein	FALSE	FALSE	FALSE
Anogam_AGAP001553	-1.22893554723153	1.39862909557815	-0.878671515641197	0.379579407280423	NA	Female vs Male Oenocytes	Female Oenocytes	3.04774	Male Oenocytes	7.31606	juvenile hormone-inducible protein	FALSE	FALSE	FALSE
Anogam_AGAP001554	0.523031896008031	0.680545222351185	0.768548332763298	0.442161487608279	0.794251597158313	Female vs Male Oenocytes	Female Oenocytes	112.624	Male Oenocytes	79.4771		FALSE	FALSE	FALSE
Anogam_AGAP001555	-0.631564247644823	0.376182275425341	-1.67887826966522	0.0931757704017652	0.379504945104437	Female vs Male Oenocytes	Female Oenocytes	144.874	Male Oenocytes	230.054		FALSE	FALSE	FALSE
Anogam_AGAP001556	-2.8077611844375	1.81421619771251	-1.54764420468614	0.121707982355207	0.437323597615319	Female vs Male Oenocytes	Female Oenocytes	2.33652	Male Oenocytes	17.219	OBP7 odorant-binding protein antennal 7	FALSE	FALSE	FALSE
Anogam_AGAP001557	0.566666959615282	0.959784553455868	0.590410584932734	0.554915415875084	0.851360039989641	Female vs Male Oenocytes	Female Oenocytes	83.2567	Male Oenocytes	56.1293	solute carrier family 12 (sodium-potassium-chloride transporter)2C member 2	FALSE	FALSE	FALSE
Anogam_AGAP001558	-0.575819179431835	0.764341783275642	-0.753353005201574	0.451237814836293	0.800103851502722	Female vs Male Oenocytes	Female Oenocytes	87.9849	Male Oenocytes	137.684	GPRGNR2 putative gonadotrophin releasing hormone receptor 2	FALSE	FALSE	FALSE
Anogam_AGAP001559	0.0180548641005302	0.522706441079722	0.0345411165457142	0.972445655633831	0.993736330170484	Female vs Male Oenocytes	Female Oenocytes	173.574	Male Oenocytes	176.152	RNA polymerase-associated protein CTR9	FALSE	FALSE	FALSE
Anogam_AGAP001560	-2.67079337742675	1.8923566958703	-1.41135832544427	0.158138984595795	NA	Female vs Male Oenocytes	Female Oenocytes	0.727016	Male Oenocytes	4.90511	homeobox protein GSH	FALSE	FALSE	FALSE
Anogam_AGAP001561	-0.956936330985156	2.16362812330462	-0.44228318197472	0.65828429943012	NA	Female vs Male Oenocytes	Female Oenocytes	3.68463	Male Oenocytes	7.28649	GPRNNA5 putative GPCR class a orphan receptor 5	FALSE	FALSE	FALSE
Anogam_AGAP001562	-0.928795901337782	1.45204980853643	-0.639644656731125	0.522403643026818	0.841138252530321	Female vs Male Oenocytes	Female Oenocytes	12.9854	Male Oenocytes	24.414	GPRNNB3 putative GPCR class b orphan receptor 3	FALSE	FALSE	FALSE
Anogam_AGAP001563	-0.866278965839238	0.341486167536365	-2.53679079328151	0.0111873787178044	0.105507660641684	Female vs Male Oenocytes	Female Oenocytes	168.005	Male Oenocytes	313.083	glycerol kinase	FALSE	FALSE	FALSE
Anogam_AGAP001564	-0.0229750894349921	0.536409356956465	-0.0428312614928095	0.965836043780595	0.993361316512332	Female vs Male Oenocytes	Female Oenocytes	71.1556	Male Oenocytes	73.8337	DNA polymerase sigma	FALSE	FALSE	FALSE
Anogam_AGAP001565	-0.243392972073287	0.430796838976212	-0.564983189411767	0.572085198391069	0.85991034371166	Female vs Male Oenocytes	Female Oenocytes	183.025	Male Oenocytes	223.45	vacuolar protein sorting-associated protein	FALSE	FALSE	FALSE
Anogam_AGAP001566	-0.561494740960196	0.448338780983102	-1.25238940902897	0.210428003610547	0.582168381791953	Female vs Male Oenocytes	Female Oenocytes	76.9836	Male Oenocytes	116.535		FALSE	FALSE	FALSE
Anogam_AGAP001568	-1.34786838920873	2.28708997781675	-0.589337718359205	0.555634747329124	NA	Female vs Male Oenocytes	Female Oenocytes	1.78136	Male Oenocytes	4.74568	chromatin assembly factor 12C p180-subunit	FALSE	FALSE	FALSE
Anogam_AGAP001569	3.31176285477591	0.929440665991257	3.56317834581069	0.000366391571528396	0.00894100870952748	Female vs Male Oenocytes	Female Oenocytes	357.216	Male Oenocytes	37.4841	myosin alkali light chain 1	FALSE	FALSE	FALSE
Anogam_AGAP001570	-0.929689460088589	0.730763608734585	-1.27221641715092	0.203296236114412	0.574012901970103	Female vs Male Oenocytes	Female Oenocytes	27.6035	Male Oenocytes	54.0256	microtubule-associated protein tau	FALSE	FALSE	FALSE
Anogam_AGAP001572	-1.60312326256629	1.07493723806799	-1.49136452417224	0.135865816825597	0.462753023118526	Female vs Male Oenocytes	Female Oenocytes	5.74618	Male Oenocytes	17.74		FALSE	FALSE	FALSE
Anogam_AGAP001573	-0.512367719037035	0.300092971529422	-1.70736327620656	0.0877545517251287	0.367655431911094	Female vs Male Oenocytes	Female Oenocytes	658.757	Male Oenocytes	963.856	Ras-related C3 botulinum toxin substrate 1	FALSE	FALSE	FALSE
Anogam_AGAP001576	1.89793954415427	1.722424675668	1.10189988042189	0.270505200597811	NA	Female vs Male Oenocytes	Female Oenocytes	6.59309	Male Oenocytes	1.83349		FALSE	FALSE	FALSE
Anogam_AGAP001577	-0.384111529321753	0.399720788104107	-0.960949594699866	0.336577512512821	0.711764914241576	Female vs Male Oenocytes	Female Oenocytes	241.766	Male Oenocytes	322.851	forkhead box subgroup	FALSE	FALSE	FALSE
Anogam_AGAP001578	-0.883934367918376	1.47377386306008	-0.599776119032951	0.548655450813297	NA	Female vs Male Oenocytes	Female Oenocytes	2.28103	Male Oenocytes	4.27774		FALSE	FALSE	FALSE
Anogam_AGAP001579	-2.05504753594189	1.55964898309068	-1.31763464614294	0.187625981758613	NA	Female vs Male Oenocytes	Female Oenocytes	1.80566	Male Oenocytes	7.86064		FALSE	FALSE	FALSE
Anogam_AGAP001580	-0.664069987561962	0.550018897793092	-1.20735849300177	0.227294113162142	0.602643276586231	Female vs Male Oenocytes	Female Oenocytes	31.8203	Male Oenocytes	51.8461		FALSE	FALSE	FALSE
Anogam_AGAP001581	-0.485991278071088	0.751587897615823	-0.646619350328476	0.517878331276547	0.838294286079126	Female vs Male Oenocytes	Female Oenocytes	50.2399	Male Oenocytes	71.8954		FALSE	FALSE	FALSE
Anogam_AGAP001582	0.00825600439527606	0.740008771216159	0.0111566304568361	0.991098481470891	0.997995878933861	Female vs Male Oenocytes	Female Oenocytes	1445.11	Male Oenocytes	1438.31		FALSE	FALSE	FALSE
Anogam_AGAP001583	-0.550056690072744	1.02875512819967	-0.534681845071673	0.592869877559045	0.871444766290951	Female vs Male Oenocytes	Female Oenocytes	26.7445	Male Oenocytes	40.1799		FALSE	FALSE	FALSE
Anogam_AGAP001584	0.149407715642785	0.339822064515245	0.43966455167034	0.660180080330099	0.901275125511944	Female vs Male Oenocytes	Female Oenocytes	492.618	Male Oenocytes	458.662	snRNP-U1-C U1 small nuclear ribonucleoprotein C	FALSE	FALSE	FALSE
Anogam_AGAP001585	0.0185580754819363	0.23953028093765	0.0774769495083879	0.938244127773434	0.987215628566101	Female vs Male Oenocytes	Female Oenocytes	471.318	Male Oenocytes	478.124	deoxynucleoside kinase	FALSE	FALSE	FALSE
Anogam_AGAP001586	-1.15670783269882	0.495627098003289	-2.33382685764922	0.0196047898753263	0.150111619090535	Female vs Male Oenocytes	Female Oenocytes	76.1256	Male Oenocytes	176.037	CUE domain-containing protein 2	FALSE	FALSE	FALSE
Anogam_AGAP001587	0.365865137173549	0.312617031561883	1.17033014914648	0.241868133542757	0.6184045545053	Female vs Male Oenocytes	Female Oenocytes	525.777	Male Oenocytes	419.301	VATI V-type H+-transporting ATPase subunit I	FALSE	FALSE	FALSE
Anogam_AGAP001588	-2.96219300770068	1.64809126313149	-1.79734767968632	0.0722804412610275	0.328684955562332	Female vs Male Oenocytes	Female Oenocytes	4.85682	Male Oenocytes	36.978	V-type H+-transporting ATPase subunit I	FALSE	FALSE	FALSE
Anogam_AGAP001589	1.1383931685692	0.35659511764895	3.19239695729623	0.00141097277603946	0.0255129683458006	Female vs Male Oenocytes	Female Oenocytes	283.724	Male Oenocytes	133.091	Methylthioribose-1-phosphate isomerase	FALSE	FALSE	FALSE
Anogam_AGAP001590	-0.575271548800086	0.486081319805134	-1.18348828757852	0.236615685662956	0.613836531739866	Female vs Male Oenocytes	Female Oenocytes	227.771	Male Oenocytes	349.032		FALSE	FALSE	FALSE
Anogam_AGAP001591	-1.17667404694653	1.78026858429221	-0.660953104115099	0.508642388544925	0.833351303466939	Female vs Male Oenocytes	Female Oenocytes	14.716	Male Oenocytes	35.329	cadherin-87A	FALSE	FALSE	FALSE
Anogam_AGAP001592	0.266121998049063	1.05542999561031	0.252145570199732	0.800928547653849	0.952642291231842	Female vs Male Oenocytes	Female Oenocytes	12.1976	Male Oenocytes	10.4855	GPRTAK2 putative tachykinin receptor 2	FALSE	FALSE	FALSE
Anogam_AGAP001593	0.0860668651638605	1.48925103110681	0.0577920467175341	0.953914273392093	NA	Female vs Male Oenocytes	Female Oenocytes	4.57466	Male Oenocytes	4.35881	homeobox protein goosecoid	FALSE	FALSE	FALSE
Anogam_AGAP001594	-0.684214366504339	0.6751602724895	-1.01341028846596	0.310864227137649	0.692351581386019	Female vs Male Oenocytes	Female Oenocytes	17.6179	Male Oenocytes	28.761		FALSE	FALSE	FALSE
Anogam_AGAP001595	0.999397000505683	0.325051374593311	3.07458167729972	0.00210797992764856	0.035067568495148	Female vs Male Oenocytes	Female Oenocytes	1067.45	Male Oenocytes	553.705	RpS29 40S ribosomal protein S29	FALSE	FALSE	FALSE
Anogam_AGAP001596	-1.23396113827818	4.0804728567969	-0.302406407684529	0.762342270655386	NA	Female vs Male Oenocytes	Female Oenocytes	0	Male Oenocytes	0.360706		FALSE	FALSE	FALSE
Anogam_AGAP001597	0.300386235720655	0.765879990082762	0.392210580783283	0.694902626856074	0.914201189552721	Female vs Male Oenocytes	Female Oenocytes	34.8911	Male Oenocytes	28.6159		FALSE	FALSE	FALSE
Anogam_AGAP001598	1.59121979015033	4.03725241889172	0.394134333217426	0.693481864073805	NA	Female vs Male Oenocytes	Female Oenocytes	0.770497	Male Oenocytes	0		FALSE	FALSE	FALSE
Anogam_AGAP001599	-1.18816836806393	0.571832385832048	-2.0778262957861	0.0377253609435782	0.224018772395175	Female vs Male Oenocytes	Female Oenocytes	26.9552	Male Oenocytes	62.9287		FALSE	FALSE	FALSE
Anogam_AGAP001600	-1.18328815196517	0.517786606469238	-2.28528149855778	0.0222963270756591	0.163173088645478	Female vs Male Oenocytes	Female Oenocytes	2581.68	Male Oenocytes	6101.98	Ser-Thr protein phosphatase-nucleotidase	FALSE	FALSE	FALSE
Anogam_AGAP001601	-0.958640940542064	0.283705055337302	-3.37900549358318	0.000727485544250897	0.015644631895835	Female vs Male Oenocytes	Female Oenocytes	906.244	Male Oenocytes	1802.61	Ser-Thr protein phosphatase-nucleotidase	FALSE	FALSE	FALSE
Anogam_AGAP001602	-1.04625771174801	0.620800153503592	-1.68533739214346	0.0919234953737234	0.376878923820713	Female vs Male Oenocytes	Female Oenocytes	36.6418	Male Oenocytes	78.8729	amiloride-sensitive sodium channel2C other	FALSE	FALSE	FALSE
Anogam_AGAP001603	0.152879292561606	0.439427669249877	0.347905476281405	0.727911172419882	0.928687055208059	Female vs Male Oenocytes	Female Oenocytes	246.351	Male Oenocytes	229.497	mitochondrial 18 kDa protein	FALSE	FALSE	FALSE
Anogam_AGAP001604	-0.287487430522569	0.305875683896554	-0.93988324557305	0.347277452281599	0.721055979273119	Female vs Male Oenocytes	Female Oenocytes	740.01	Male Oenocytes	930.567	protein-tyrosine phosphatase	FALSE	FALSE	FALSE
Anogam_AGAP001606	-0.0279138553052108	0.475798848176667	-0.0586673452703404	0.953217069219677	0.991189830502725	Female vs Male Oenocytes	Female Oenocytes	411.029	Male Oenocytes	430.279	5-oxoprolinase (ATP-hydrolysing)	FALSE	FALSE	FALSE
Anogam_AGAP001608	0.591782481879084	0.406388965979781	1.45619721847597	0.145338108245753	0.479872453446221	Female vs Male Oenocytes	Female Oenocytes	396.838	Male Oenocytes	267.851		FALSE	FALSE	FALSE
Anogam_AGAP001609	-0.99395063837687	0.674533628136857	-1.47353756271912	0.14060614305255	0.47183210019703	Female vs Male Oenocytes	Female Oenocytes	329.676	Male Oenocytes	686.655	E3 ubiquitin-protein ligase MYLIP	FALSE	FALSE	FALSE
Anogam_AGAP001610	-0.516945112427759	0.458811711823377	-1.12670426474807	0.259867538708348	0.639704791450151	Female vs Male Oenocytes	Female Oenocytes	2372.76	Male Oenocytes	3451.81		FALSE	FALSE	FALSE
Anogam_AGAP001611	0.180713580562189	0.268886042958794	0.672082412956936	0.501531232088866	0.830390793644044	Female vs Male Oenocytes	Female Oenocytes	296.91	Male Oenocytes	269.659	Diphosphomevalonate decarboxylase	FALSE	FALSE	FALSE
Anogam_AGAP001612	-0.343185909503234	0.437271075327187	-0.784835606257392	0.432549960776114	0.786848123142249	Female vs Male Oenocytes	Female Oenocytes	251.179	Male Oenocytes	329.662	Peroxisome assembly factor 2	FALSE	FALSE	FALSE
Anogam_AGAP001613	0.00934453435447348	0.223987358238283	0.0417190256984618	0.966722686850291	0.993361316512332	Female vs Male Oenocytes	Female Oenocytes	1173.84	Male Oenocytes	1198.91		FALSE	FALSE	FALSE
Anogam_AGAP001614	-0.563292970450675	0.893350474581642	-0.630539733819995	0.528341514816741	0.843092873573022	Female vs Male Oenocytes	Female Oenocytes	26.2072	Male Oenocytes	40.4038		FALSE	FALSE	FALSE
Anogam_AGAP001615	-0.542363710037131	0.469930021740313	-1.15413717989025	0.248443932504622	0.62852614411446	Female vs Male Oenocytes	Female Oenocytes	226.633	Male Oenocytes	335.186		FALSE	FALSE	FALSE
Anogam_AGAP001616	-0.468280680905039	0.28844882529319	-1.62344457610136	0.104494402234482	0.401277008611481	Female vs Male Oenocytes	Female Oenocytes	850.734	Male Oenocytes	1211.9		FALSE	FALSE	FALSE
Anogam_AGAP001617	-0.495069036627752	0.241849106674266	-2.04701618887736	0.0406564950546658	0.233023223720561	Female vs Male Oenocytes	Female Oenocytes	3828.95	Male Oenocytes	5542.94	Ras-related protein Rab-7A	FALSE	FALSE	FALSE
Anogam_AGAP001618	4.17184832869244	2.59838089786032	1.60555688048962	0.10837130603665	NA	Female vs Male Oenocytes	Female Oenocytes	4.42531	Male Oenocytes	0	homeobox protein EMX	FALSE	FALSE	FALSE
Anogam_AGAP001619	3.57213736247894	3.94022470886444	0.906582143511409	0.364627808051507	NA	Female vs Male Oenocytes	Female Oenocytes	2.94732	Male Oenocytes	0	homeobox protein EMX	FALSE	FALSE	FALSE
Anogam_AGAP001620	-10.6031105772164	1.45471959514761	-7.28876589865452	3.12807035235851e-13	1.87242611209413e-10	Female vs Male Oenocytes	Female Oenocytes	0	Male Oenocytes	335.981		FALSE	TRUE	TRUE
Anogam_AGAP001621	1.48588232007169	0.283985818645912	5.23224126879505	1.67466966177107e-07	1.62299414077928e-05	Female vs Male Oenocytes	Female Oenocytes	1007.99	Male Oenocytes	369.21	proline synthetase co-transcribed homolog	TRUE	FALSE	TRUE
Anogam_AGAP001622	3.64607099106148	1.02267930728527	3.56521439818711	0.000363558869936771	0.00889320927999179	Female vs Male Oenocytes	Female Oenocytes	308.587	Male Oenocytes	25.7148	myosin light chain 5	FALSE	FALSE	FALSE
Anogam_AGAP001623	5.76016567703968	1.36205697138114	4.22901963579307	2.34711862110028e-05	0.000974868534217	Female vs Male Oenocytes	Female Oenocytes	43.9941	Male Oenocytes	0.721144		TRUE	FALSE	TRUE
Anogam_AGAP001624	1.00102543042273	0.873791165047532	1.14561175537667	0.251955831079393	0.631773102412782	Female vs Male Oenocytes	Female Oenocytes	105.659	Male Oenocytes	53.4345		FALSE	FALSE	FALSE
Anogam_AGAP001625	0.696144207488023	2.69212560644119	0.258585337111472	0.795955197838063	NA	Female vs Male Oenocytes	Female Oenocytes	7.66649	Male Oenocytes	4.60625		FALSE	FALSE	FALSE
Anogam_AGAP001626	6.83750185663176	1.68678273401713	4.05357591036519	5.0440622036195e-05	0.00181372356834035	Female vs Male Oenocytes	Female Oenocytes	52.8932	Male Oenocytes	0.352714		FALSE	FALSE	FALSE
Anogam_AGAP001627	1.61044174514482	1.07624007646746	1.49635920493759	0.134560074394666	0.460341062206019	Female vs Male Oenocytes	Female Oenocytes	784.939	Male Oenocytes	253.214	solute carrier family 7 (cationic amino acid transporter2C y+ system)	FALSE	FALSE	FALSE
Anogam_AGAP001628	-1.55904123481561	1.90809290071852	-0.817067782301652	0.413889693279343	0.773856222495478	Female vs Male Oenocytes	Female Oenocytes	7.37744	Male Oenocytes	21.641	cystinosin homolog	FALSE	FALSE	FALSE
Anogam_AGAP001629	0.777778676620484	0.57503363272379	1.35257945337274	0.176190020106298	0.534718056845122	Female vs Male Oenocytes	Female Oenocytes	228.33	Male Oenocytes	139.301		FALSE	FALSE	FALSE
Anogam_AGAP001630	-0.486328670121109	0.419368457823065	-1.15966916693171	0.246183528243498	0.625196801448924	Female vs Male Oenocytes	Female Oenocytes	967.708	Male Oenocytes	1410.32	Tpi Triosephosphate isomerase	FALSE	FALSE	FALSE
Anogam_AGAP001631	1.64582420609533	3.97259074764731	0.414294930095691	0.678658126371629	NA	Female vs Male Oenocytes	Female Oenocytes	1.44306	Male Oenocytes	0.361104	amiloride-sensitive sodium channel2C other	FALSE	FALSE	FALSE
Anogam_AGAP001632	0.321018458357806	1.65049610158127	0.194498162128496	0.845785834660068	NA	Female vs Male Oenocytes	Female Oenocytes	4.95218	Male Oenocytes	4.20543		FALSE	FALSE	FALSE
Anogam_AGAP001633	1.98441001131308	1.43433518609822	1.38350507646069	0.166510051847078	0.517627538947663	Female vs Male Oenocytes	Female Oenocytes	55.4365	Male Oenocytes	14.4023		FALSE	FALSE	FALSE
Anogam_AGAP001634	-0.891159227721359	0.964697830932354	-0.923770323874448	0.355605909109931	0.728635460082921	Female vs Male Oenocytes	Female Oenocytes	45.0854	Male Oenocytes	87.1416		FALSE	FALSE	FALSE
Anogam_AGAP001635	-0.902685514078294	0.753218161996595	-1.19843832719792	0.230746419015182	0.606383156191423	Female vs Male Oenocytes	Female Oenocytes	75.9319	Male Oenocytes	148.226	sodium-coupled monocarboxylate transporter 2	FALSE	FALSE	FALSE
Anogam_AGAP001636	1.51180499117767	0.621060244885546	2.4342324333709	0.0149234086313123	0.126234917898781	Female vs Male Oenocytes	Female Oenocytes	63.386	Male Oenocytes	23.1699	serine-threonine-protein kinase greatwall	FALSE	FALSE	FALSE
Anogam_AGAP001637	-3.90592758638589	3.94583981029046	-0.989884986258062	0.322230338719669	NA	Female vs Male Oenocytes	Female Oenocytes	0	Male Oenocytes	3.34828	sosie protein sosie	FALSE	FALSE	FALSE
Anogam_AGAP001638	-0.13990543252326	1.00428839313779	-0.139308024945047	0.889206748728293	0.973742127450481	Female vs Male Oenocytes	Female Oenocytes	39.8752	Male Oenocytes	44.2692		FALSE	FALSE	FALSE
Anogam_AGAP001639	-0.650085033733268	0.36194650963284	-1.79608040534143	0.0724817302857455	0.329283020416579	Female vs Male Oenocytes	Female Oenocytes	349.924	Male Oenocytes	564.539	polyA-binding protein interacting protein	FALSE	FALSE	FALSE
Anogam_AGAP001640	-0.124945746727701	0.352914741259827	-0.354039466534248	0.723309306244433	0.92638325226631	Female vs Male Oenocytes	Female Oenocytes	396.829	Male Oenocytes	441.636		FALSE	FALSE	FALSE
Anogam_AGAP001643	-0.268072004471902	0.241155402150546	-1.11161517461903	0.266303645220539	0.646036453823057	Female vs Male Oenocytes	Female Oenocytes	292.686	Male Oenocytes	362.927		FALSE	FALSE	FALSE
Anogam_AGAP001644	-0.134188691302249	0.435618924416308	-0.308041464181222	0.758050781498692	0.93752123876163	Female vs Male Oenocytes	Female Oenocytes	98.0938	Male Oenocytes	111.153	dimethylargininase	FALSE	FALSE	FALSE
Anogam_AGAP001645	0.330521819693888	0.247447338480014	1.33572590323328	0.181638879543056	0.543325099168601	Female vs Male Oenocytes	Female Oenocytes	333.397	Male Oenocytes	272.394	RNA-binding protein FUS	FALSE	FALSE	FALSE
Anogam_AGAP001646	-0.455687049948974	0.374398363567552	-1.21711816688204	0.223559259594205	0.599669243624575	Female vs Male Oenocytes	Female Oenocytes	112.158	Male Oenocytes	158.557		FALSE	FALSE	FALSE
Anogam_AGAP001647	0.147728035975832	0.614383697776048	0.240449146861447	0.80998208180999	0.954752422622317	Female vs Male Oenocytes	Female Oenocytes	32.5693	Male Oenocytes	29.8945		FALSE	FALSE	FALSE
Anogam_AGAP001648	-0.112774473561282	1.03832120174525	-0.108612318973865	NA	NA	Female vs Male Oenocytes	Female Oenocytes	4443.2	Male Oenocytes	4727.38	CLIPB17 CLIP-domain serine protease	FALSE	FALSE	FALSE
Anogam_AGAP001649	-1.3255051093771	0.441954818533542	-2.99918691638045	0.00270701178606302	0.0419277807229486	Female vs Male Oenocytes	Female Oenocytes	1247.03	Male Oenocytes	3235.86	Glucosylceramidase	FALSE	FALSE	FALSE
Anogam_AGAP001650	-1.01247421271994	0.376893094775908	-2.68636976042752	0.00722331025861551	0.0784465370241957	Female vs Male Oenocytes	Female Oenocytes	567.57	Male Oenocytes	1188.4	cation transport regulator-like protein 2	FALSE	FALSE	FALSE
Anogam_AGAP001651	-0.16366810000365	0.389966425494766	-0.419697926035551	0.674706140379393	0.907793271764095	Female vs Male Oenocytes	Female Oenocytes	1291.66	Male Oenocytes	1499.75	26S proteasome regulatory subunit N9	FALSE	FALSE	FALSE
Anogam_AGAP001652	-0.064156925236773	0.738322372957041	-0.0868955453426385	0.930754540429509	0.986086226279092	Female vs Male Oenocytes	Female Oenocytes	5346.6	Male Oenocytes	5577.8	lipase	FALSE	FALSE	FALSE
Anogam_AGAP001653	-0.281636405881696	0.321804430962904	-0.875178769412784	0.381476643088194	0.748414423722562	Female vs Male Oenocytes	Female Oenocytes	852.211	Male Oenocytes	1069.19	NADH dehydrogenase (ubiquinone) Fe-S protein 1	FALSE	FALSE	FALSE
Anogam_AGAP001654	0.0510278190793609	0.42223297062686	0.120852284471304	0.903808036536569	0.979369865713125	Female vs Male Oenocytes	Female Oenocytes	248.321	Male Oenocytes	246.487	Histone deacetylase complex subunit SAP30 homolog	FALSE	FALSE	FALSE
Anogam_AGAP001655	0.416008976987867	0.450308149218412	0.923831775440713	0.355573908537798	0.728635460082921	Female vs Male Oenocytes	Female Oenocytes	199.686	Male Oenocytes	153.562		FALSE	FALSE	FALSE
Anogam_AGAP001656	1.73318567570658	0.726151457897377	2.38681015765656	0.0169952648546785	0.136498670214056	Female vs Male Oenocytes	Female Oenocytes	200.84	Male Oenocytes	62.5323	ribosomal RNA-processing protein 7	FALSE	FALSE	FALSE
Anogam_AGAP001657	-3.16217233200868	1.2511948665678	-2.527322015541	0.0114936064831399	0.107414228082885	Female vs Male Oenocytes	Female Oenocytes	11.5105	Male Oenocytes	106.411	hexamerin	FALSE	FALSE	FALSE
Anogam_AGAP001658	-0.876625461930801	1.1059573155106	-0.792639507543816	0.427987883808491	0.784680829969477	Female vs Male Oenocytes	Female Oenocytes	14.2705	Male Oenocytes	27.1382	Beat-VI	FALSE	FALSE	FALSE
Anogam_AGAP001659	-1.93221590805644	0.716721304922364	-2.69590968593537	0.00701966963947269	0.076891451293083	Female vs Male Oenocytes	Female Oenocytes	13.8548	Male Oenocytes	54.0925	hexamerin	FALSE	FALSE	FALSE
Anogam_AGAP001660	0.944506714140473	0.97173724456346	0.971977475829672	0.331061754191643	0.707916616564885	Female vs Male Oenocytes	Female Oenocytes	133.88	Male Oenocytes	71.4726	ciliary dynein heavy chain	FALSE	FALSE	FALSE
Anogam_AGAP001661	-0.0810225052751497	1.54471055914991	-0.0524515772843157	0.958168877914409	0.992237966420474	Female vs Male Oenocytes	Female Oenocytes	26.7245	Male Oenocytes	28.3251		FALSE	FALSE	FALSE
Anogam_AGAP001662	2.30034402047816	0.81055357306502	2.83799133939989	0.00453984144270382	0.0573881074794461	Female vs Male Oenocytes	Female Oenocytes	18629.8	Male Oenocytes	3767.65		FALSE	FALSE	FALSE
Anogam_AGAP001664	-0.745524528306147	2.25956005283843	-0.329942338717499	0.741443531476268	NA	Female vs Male Oenocytes	Female Oenocytes	3.61357	Male Oenocytes	6.01028	CPR1 cuticular protein RR-2 family 1	FALSE	FALSE	FALSE
Anogam_AGAP001665	0.550570725184094	2.2764817915105	0.241851583103934	0.808895167559772	NA	Female vs Male Oenocytes	Female Oenocytes	4.58136	Male Oenocytes	3.14755	CPR2 cuticular protein RR-2 family 2	FALSE	FALSE	FALSE
Anogam_AGAP001666	0.948027945217541	1.1355745019206	0.834844339683692	0.403805357128411	0.766341535646907	Female vs Male Oenocytes	Female Oenocytes	15.7989	Male Oenocytes	8.44359	CPR3 cuticular protein RR-2 family 3	FALSE	FALSE	FALSE
Anogam_AGAP001667	1.97553895808178	1.47058127057845	1.34337285371839	0.179151272421272	0.539132836784125	Female vs Male Oenocytes	Female Oenocytes	15.524	Male Oenocytes	4.05812	CPR4 cuticular protein RR-2 family 4	FALSE	FALSE	FALSE
Anogam_AGAP001668	1.57449343929236	1.10055450343032	1.43063649677033	0.152534421831651	0.493179514551301	Female vs Male Oenocytes	Female Oenocytes	51.171	Male Oenocytes	17.4058	CPR5 cuticular protein RR-2 family 5	FALSE	FALSE	FALSE
Anogam_AGAP001669	-2.19852435621016	1.79585515911586	-1.22422142178356	0.220868710169113	0.59775531773428	Female vs Male Oenocytes	Female Oenocytes	5.63232	Male Oenocytes	25.2302	CPR6 cuticular protein RR-2 family 6	FALSE	FALSE	FALSE
Anogam_AGAP001670	0.0651858528281471	1.13328284131996	0.0575194915615449	0.95413137979109	0.991189830502725	Female vs Male Oenocytes	Female Oenocytes	28.5617	Male Oenocytes	27.5999	translation initiation factor IF-2	FALSE	FALSE	FALSE
Anogam_AGAP001671	-3.57917302937415	2.5023883903134	-1.43030276324368	0.152630142076516	NA	Female vs Male Oenocytes	Female Oenocytes	1.08834	Male Oenocytes	13.4123	forkhead box protein A22C hepatocyte nuclear factor 3-beta	FALSE	FALSE	FALSE
Anogam_AGAP001672	-8.51895609645326	1.54348812756116	-5.51928838604927	3.40375206598089e-08	4.22397329553922e-06	Female vs Male Oenocytes	Female Oenocytes	0	Male Oenocytes	73.9355	Kl-5 beta dynein heavy chain	FALSE	TRUE	TRUE
Anogam_AGAP001674	-0.756871204151565	0.75484917645457	-1.00267871749757	0.316015901701072	0.696357257624537	Female vs Male Oenocytes	Female Oenocytes	16.7911	Male Oenocytes	28.9357	sidestep	FALSE	FALSE	FALSE
Anogam_AGAP001675	-9.50836578397141	3.90757644624404	-2.43331535921987	NA	NA	Female vs Male Oenocytes	Female Oenocytes	0	Male Oenocytes	150.791		FALSE	FALSE	FALSE
Anogam_AGAP001676	-4.71067220894689	1.02780155612966	-4.58325070715558	4.57802599619775e-06	0.000267735589294875	Female vs Male Oenocytes	Female Oenocytes	5.45472	Male Oenocytes	147.994	actin2C cytoplasmic	FALSE	TRUE	TRUE
Anogam_AGAP001677	-0.173371980763422	0.304240416074709	-0.569851905280226	0.568778147372149	0.858419633407967	Female vs Male Oenocytes	Female Oenocytes	834.051	Male Oenocytes	961.052		FALSE	FALSE	FALSE
Anogam_AGAP001678	-0.400618937694928	0.325162478919814	-1.23205770550704	0.217927528993156	0.593520884650537	Female vs Male Oenocytes	Female Oenocytes	1208.88	Male Oenocytes	1638.27		FALSE	FALSE	FALSE
Anogam_AGAP001679	0.315086851872122	1.52591050501702	0.206491043109116	0.836407360552575	0.961183659060757	Female vs Male Oenocytes	Female Oenocytes	8.96266	Male Oenocytes	7.57612		FALSE	FALSE	FALSE
Anogam_AGAP001680	-7.51186967773038	1.24201278921373	-6.0481419700081	1.46525813285989e-09	2.71099395636042e-07	Female vs Male Oenocytes	Female Oenocytes	1.92911	Male Oenocytes	363.715		FALSE	TRUE	TRUE
Anogam_AGAP001681	-0.524364643209531	0.301260943020971	-1.74056629429401	0.0817596301093333	0.353846900088454	Female vs Male Oenocytes	Female Oenocytes	488.499	Male Oenocytes	724.384	ubiquitin conjugation factor E4 A	FALSE	FALSE	FALSE
Anogam_AGAP001682	-0.164686653739039	0.486925009856266	-0.338217693495869	0.735199143243143	0.930613718969052	Female vs Male Oenocytes	Female Oenocytes	152.894	Male Oenocytes	176.392	Mitochondrial inner membrane protease subunit 1	FALSE	FALSE	FALSE
Anogam_AGAP001683	0.0913659153005279	0.245458069091878	0.372226163265092	0.709724467936702	0.9210956302468	Female vs Male Oenocytes	Female Oenocytes	834.314	Male Oenocytes	802.444	calcium-calmodulin-dependent serine protein kinase	FALSE	FALSE	FALSE
Anogam_AGAP001684	-4.40474363093645	1.35639695188449	-3.24738537993378	0.00116470566104137	0.0222270116847839	Female vs Male Oenocytes	Female Oenocytes	1.80384	Male Oenocytes	39.3012	Alkaline phosphatase	FALSE	FALSE	FALSE
Anogam_AGAP001685	-0.0268908941098932	0.459847105637383	-0.0584779022858487	0.953367963788856	0.991189830502725	Female vs Male Oenocytes	Female Oenocytes	132.754	Male Oenocytes	139.106	nuclear pore complex protein Nup107	FALSE	FALSE	FALSE
Anogam_AGAP001686	0.300012397161739	0.408090288300233	0.73516181532117	0.46224095118366	0.806129206383021	Female vs Male Oenocytes	Female Oenocytes	146.638	Male Oenocytes	123.234	U6 snRNA-associated Sm-like protein LSm1	FALSE	FALSE	FALSE
Anogam_AGAP001687	1.83663817783555	1.25025810416522	1.46900721676334	0.141830831799292	0.473211871793827	Female vs Male Oenocytes	Female Oenocytes	18.9251	Male Oenocytes	5.33968		FALSE	FALSE	FALSE
Anogam_AGAP001688	0.322499375802791	0.524623121501571	0.614725814752001	0.538735808663394	0.844605768286161	Female vs Male Oenocytes	Female Oenocytes	114.74	Male Oenocytes	94.0235	alpha-12C4-N-acetylglucosaminyltransferase EXTL3	FALSE	FALSE	FALSE
Anogam_AGAP001690	-1.57442101985731	1.14223653094622	-1.37836689442341	0.168090039250968	0.519746046617398	Female vs Male Oenocytes	Female Oenocytes	69.3562	Male Oenocytes	207.366	regulating synaptic membrane exocytosis protein 2	FALSE	FALSE	FALSE
Anogam_AGAP001694	-0.470281589769215	0.345578725719731	-1.36085225961108	0.17356038296919	0.530270042224908	Female vs Male Oenocytes	Female Oenocytes	959.971	Male Oenocytes	1362.74	Exo4 exocyst complex component 4	FALSE	FALSE	FALSE
Anogam_AGAP001695	-0.134658113083642	0.386879572257578	-0.348062091513038	0.727793552979293	0.928687055208059	Female vs Male Oenocytes	Female Oenocytes	160.365	Male Oenocytes	180.694		FALSE	FALSE	FALSE
Anogam_AGAP001696	-1.20175612998418	1.50570895268683	-0.798133083979962	0.424793264288536	0.782564794055699	Female vs Male Oenocytes	Female Oenocytes	9.26678	Male Oenocytes	21.9701	signal peptidase2C endoplasmic reticulum-type	FALSE	FALSE	FALSE
Anogam_AGAP001697	-0.182756848774787	0.574135236085908	-0.31831672624852	0.750244697947317	0.935667286094958	Female vs Male Oenocytes	Female Oenocytes	4394.14	Male Oenocytes	5219.51	20S proteasome subunit beta 3	FALSE	FALSE	FALSE
Anogam_AGAP001698	-4.1984710818559	1.58345084734927	-2.65146915604247	0.00801424325617218	0.0846863337225422	Female vs Male Oenocytes	Female Oenocytes	3.23152	Male Oenocytes	62.6187		FALSE	FALSE	FALSE
Anogam_AGAP001699	-0.290126903113731	0.658046073930904	-0.440891473420134	0.65929156677672	0.901275125511944	Female vs Male Oenocytes	Female Oenocytes	863.975	Male Oenocytes	1108.78	fatty-acid amide hydrolase 2	FALSE	FALSE	FALSE
Anogam_AGAP001700	0.348385292140986	0.360625866909676	0.966057413258834	0.334015452864989	0.71003577362735	Female vs Male Oenocytes	Female Oenocytes	450.619	Male Oenocytes	361.348	translational activator GCN1	FALSE	FALSE	FALSE
Anogam_AGAP001701	0.536863735438405	0.2217159852796	2.42140292573573	0.0154607297762561	0.128957693609166	Female vs Male Oenocytes	Female Oenocytes	1622.66	Male Oenocytes	1151.84	Small ubiquitin-related modifier	FALSE	FALSE	FALSE
Anogam_AGAP001702	0.415427961884726	0.746957378920815	0.556160195491911	0.578101347495505	0.86190989195697	Female vs Male Oenocytes	Female Oenocytes	102.941	Male Oenocytes	80.0686		FALSE	FALSE	FALSE
Anogam_AGAP001703	-0.0806462887971696	0.229471104549523	-0.35144420015534	0.725255127570049	0.927626467842234	Female vs Male Oenocytes	Female Oenocytes	3045.4	Male Oenocytes	3322.09	AP-2 complex subunit sigma	FALSE	FALSE	FALSE
Anogam_AGAP001704	-0.0576702446256735	0.405464852809951	-0.142232413552019	0.886896429737284	0.973252976770875	Female vs Male Oenocytes	Female Oenocytes	381.354	Male Oenocytes	411.229	isopentenyl-diphosphate delta-isomerase	FALSE	FALSE	FALSE
Anogam_AGAP001705	1.33209988128094	0.800158328921153	1.66479537003258	0.0959535879754924	0.38432581107555	Female vs Male Oenocytes	Female Oenocytes	44.8912	Male Oenocytes	18.1306		FALSE	FALSE	FALSE
Anogam_AGAP001706	0.861399185305744	0.936812588485094	0.919500010881259	0.357834099935304	0.730185292864784	Female vs Male Oenocytes	Female Oenocytes	57.5758	Male Oenocytes	33.0273		FALSE	FALSE	FALSE
Anogam_AGAP001707	-0.854958999428346	0.78576861466238	-1.08805440109834	0.276571092227577	0.657874575621277	Female vs Male Oenocytes	Female Oenocytes	448.471	Male Oenocytes	815.964		FALSE	FALSE	FALSE
Anogam_AGAP001708	-0.829640894899218	0.862811824357689	-0.961554850638302	0.336273260260192	0.711650514032174	Female vs Male Oenocytes	Female Oenocytes	20.4007	Male Oenocytes	37.9617		FALSE	FALSE	FALSE
Anogam_AGAP001710	-0.414616283923534	0.313418081528237	-1.32288565452845	0.185873406644063	0.549679682072068	Female vs Male Oenocytes	Female Oenocytes	291.664	Male Oenocytes	398.889	PAX-interacting protein 1	FALSE	FALSE	FALSE
Anogam_AGAP001711	-0.0478825797235575	0.263386620557764	-0.181795793659368	0.855742985689914	0.965752325482766	Female vs Male Oenocytes	Female Oenocytes	1149.23	Male Oenocytes	1228.68	NADH dehydrogenase (ubiquinone) Fe-S protein 8	FALSE	FALSE	FALSE
Anogam_AGAP001712	-0.208569509265134	0.32317652994544	-0.645373317487956	0.518685290415488	0.838607121944345	Female vs Male Oenocytes	Female Oenocytes	1217.26	Male Oenocytes	1435.54	actin related protein 2-3 complex2C subunit 3	FALSE	FALSE	FALSE
Anogam_AGAP001713	-0.171071927613495	0.457573047788129	-0.373868016135223	0.708502513116501	0.920781810149874	Female vs Male Oenocytes	Female Oenocytes	4618.39	Male Oenocytes	5416.66	stearoyl-CoA desaturase (delta-9 desaturase)	FALSE	FALSE	FALSE
Anogam_AGAP001715	-0.0103298208644234	0.486385284584376	-0.0212379387120036	0.983055850384552	0.996435391845858	Female vs Male Oenocytes	Female Oenocytes	93.5289	Male Oenocytes	97.8604	enoyl-CoA hydratase echA5	FALSE	FALSE	FALSE
Anogam_AGAP001716	-1.48404277882447	1.26115470900664	-1.17673332877089	0.239301960748531	0.616727532573541	Female vs Male Oenocytes	Female Oenocytes	12.0897	Male Oenocytes	34.8936	tubby	FALSE	FALSE	FALSE
Anogam_AGAP001717	-5.56206104682307	1.29239652730082	-4.30367996921152	1.6798427066435e-05	0.000736813766500183	Female vs Male Oenocytes	Female Oenocytes	1.97046	Male Oenocytes	95.9667		FALSE	TRUE	TRUE
Anogam_AGAP001718	-0.638540637885028	0.684376464862331	-0.933025419004548	0.350806844262642	0.724652124537067	Female vs Male Oenocytes	Female Oenocytes	4371.5	Male Oenocytes	6809.46		FALSE	FALSE	FALSE
Anogam_AGAP001719	-0.636100623513868	0.486702840310146	-1.30695893023456	0.191226660141018	0.556177473718827	Female vs Male Oenocytes	Female Oenocytes	654.369	Male Oenocytes	1031.95		FALSE	FALSE	FALSE
Anogam_AGAP001720	1.46780883570891	0.471458171701305	3.11333841221199	0.00184983774643041	0.031690149676222	Female vs Male Oenocytes	Female Oenocytes	90.7381	Male Oenocytes	33.4586	RrnaAD2C ribosomal RNA adenine dimethylase	FALSE	FALSE	FALSE
Anogam_AGAP001721	0.169843095597598	0.258421612273277	0.657232551501892	0.511031398063072	0.835094508974901	Female vs Male Oenocytes	Female Oenocytes	342.642	Male Oenocytes	312.19	translocon-associated protein subunit alpha	FALSE	FALSE	FALSE
Anogam_AGAP001722	-1.11986682037644	3.25120559973734	-0.344446632494392	0.730510424249855	NA	Female vs Male Oenocytes	Female Oenocytes	1.1174	Male Oenocytes	2.51021	Carboxylic ester hydrolase	FALSE	FALSE	FALSE
Anogam_AGAP001723	-0.609921217445699	0.765305296607439	-0.796964584133221	0.425471600178452	0.782929295373585	Female vs Male Oenocytes	Female Oenocytes	28.2215	Male Oenocytes	44.8276	COEAE1A carboxylesterase alpha esterase	FALSE	FALSE	FALSE
Anogam_AGAP001724	-0.282015182423101	0.269877842897653	-1.04497345686156	0.296035237363801	0.676196313224252	Female vs Male Oenocytes	Female Oenocytes	905.957	Male Oenocytes	1134.18	Sply sphingosine-1-phosphate lyase	FALSE	FALSE	FALSE
Anogam_AGAP001725	0.154360129961247	0.400798850372511	0.385131169457651	0.700140235917073	0.916519931470931	Female vs Male Oenocytes	Female Oenocytes	106.673	Male Oenocytes	98.347		FALSE	FALSE	FALSE
Anogam_AGAP001726	-0.169777990865815	0.28286739907912	-0.600203457233074	0.548370649865621	0.84818033353916	Female vs Male Oenocytes	Female Oenocytes	279.24	Male Oenocytes	322.733		FALSE	FALSE	FALSE
Anogam_AGAP001727	-5.15209296076662	2.22593002882956	-2.31457992571118	0.0206359325237324	0.156127322945354	Female vs Male Oenocytes	Female Oenocytes	0.727244	Male Oenocytes	27.2831		FALSE	FALSE	FALSE
Anogam_AGAP001728	-9.30083952946265	1.48923334936154	-6.2453876240752	4.22750385898055e-10	9.35197375412741e-08	Female vs Male Oenocytes	Female Oenocytes	0	Male Oenocytes	133.833		FALSE	TRUE	TRUE
Anogam_AGAP001729	-0.138655941590403	0.332060840090915	-0.417561858701679	0.676267488208286	0.908114065623983	Female vs Male Oenocytes	Female Oenocytes	251.103	Male Oenocytes	285.106	protein farnesyltransferase subunit beta	FALSE	FALSE	FALSE
Anogam_AGAP001730	-0.381132308395985	0.211583257581107	-1.80133491067876	0.0716501085054334	0.32729715691882	Female vs Male Oenocytes	Female Oenocytes	6598.19	Male Oenocytes	8833.05	cyclin G2	FALSE	FALSE	FALSE
Anogam_AGAP001731	0.275527852910576	0.387908675038538	0.710290515888059	0.477523999883168	0.817105748513041	Female vs Male Oenocytes	Female Oenocytes	143.832	Male Oenocytes	122.076	F-box protein 11	FALSE	FALSE	FALSE
Anogam_AGAP001732	0.0446222841124568	0.763509620940984	0.0584436435227395	0.953395251656793	0.991189830502725	Female vs Male Oenocytes	Female Oenocytes	532.015	Male Oenocytes	542.965	hemomucin	FALSE	FALSE	FALSE
Anogam_AGAP001733	-0.443544797771212	0.387305614804207	-1.14520621653119	0.252123743819846	0.631773102412782	Female vs Male Oenocytes	Female Oenocytes	539.146	Male Oenocytes	750.289	Exo2 exocyst complex component 2	FALSE	FALSE	FALSE
Anogam_AGAP001734	0.25729800845774	0.425768849278714	0.60431384046443	0.545635006270127	0.846695241611607	Female vs Male Oenocytes	Female Oenocytes	586.371	Male Oenocytes	497.972	nicastrin	FALSE	FALSE	FALSE
Anogam_AGAP001735	-3.06123287738116	0.934275649111056	-3.27658425036965	0.0010507095977642	0.020453457995777	Female vs Male Oenocytes	Female Oenocytes	15.4919	Male Oenocytes	129.184	RIB43A domain with coiled-coils 1	FALSE	FALSE	FALSE
Anogam_AGAP001736	-0.243454110878897	0.4195165452357	-0.580320642043128	0.56169840977364	0.85465693410293	Female vs Male Oenocytes	Female Oenocytes	259.534	Male Oenocytes	319.05	histone deacetylase 11	FALSE	FALSE	FALSE
Anogam_AGAP001737	0.00771824048142117	0.378243349175477	0.0204054889484401	0.983719905215354	0.996435391845858	Female vs Male Oenocytes	Female Oenocytes	223.935	Male Oenocytes	229.4	adenylyltransferase and sulfurtransferase MOCS3 Molybdopterin-synthase adenylyltransferase Molybdopterin-synthase sulfurtransferase	FALSE	FALSE	FALSE
Anogam_AGAP001738	0.959048177059245	0.333553228750299	2.8752477697561	0.00403710558748004	0.0542635272893	Female vs Male Oenocytes	Female Oenocytes	484.718	Male Oenocytes	257.152	mRpL1 39S ribosomal protein L12C mitochondrial	FALSE	FALSE	FALSE
Anogam_AGAP001739	2.0335610742791	1.31490505944803	1.54654593475573	0.121972775403256	0.437902854403075	Female vs Male Oenocytes	Female Oenocytes	33.6796	Male Oenocytes	8.44078		FALSE	FALSE	FALSE
Anogam_AGAP001740	3.37817599195797	3.94501715529195	0.856314651870752	0.391823758995848	NA	Female vs Male Oenocytes	Female Oenocytes	2.83204	Male Oenocytes	0		FALSE	FALSE	FALSE
Anogam_AGAP001741	-4.41563535913008	2.58757369522833	-1.70647714006091	0.0879192789648693	NA	Female vs Male Oenocytes	Female Oenocytes	0.398377	Male Oenocytes	9.10753		FALSE	FALSE	FALSE
Anogam_AGAP001742	0.246832986713452	0.769297290018478	0.320855136130173	0.748320173923646	0.934573648729384	Female vs Male Oenocytes	Female Oenocytes	35.2723	Male Oenocytes	30.1803		FALSE	FALSE	FALSE
Anogam_AGAP001743	0.0863502329534115	0.46315271958739	0.186440086177921	0.852099659249697	0.964978216171848	Female vs Male Oenocytes	Female Oenocytes	165.374	Male Oenocytes	159.672	estrogen-related receptor ERR	FALSE	FALSE	FALSE
Anogam_AGAP001744	0.444666615738161	0.523237677223118	0.849836766530381	0.395415845416113	0.75977183590528	Female vs Male Oenocytes	Female Oenocytes	328.506	Male Oenocytes	245.029	cytochrome c oxidase assembly protein subunit 15	FALSE	FALSE	FALSE
Anogam_AGAP001745	-0.201768164099501	0.50220421805423	-0.401765172107163	0.687856855974257	0.911125008342444	Female vs Male Oenocytes	Female Oenocytes	1374.86	Male Oenocytes	1639.36	26S proteasome regulatory subunit RPN2	FALSE	FALSE	FALSE
Anogam_AGAP001746	-0.467998598363366	0.237776918876683	-1.96822551395782	0.0490420958784793	0.260465745124951	Female vs Male Oenocytes	Female Oenocytes	331.422	Male Oenocytes	472.741		FALSE	FALSE	FALSE
Anogam_AGAP001747	-0.182318691288716	0.314184280708861	-0.580292212192697	0.561717578316397	0.85465693410293	Female vs Male Oenocytes	Female Oenocytes	285.105	Male Oenocytes	332.082	Ubiquitin domain-containing protein	FALSE	FALSE	FALSE
Anogam_AGAP001748	2.08651634308782	1.38065182489485	1.51125454330003	0.130723610606807	0.453083781855688	Female vs Male Oenocytes	Female Oenocytes	60.103	Male Oenocytes	14.5451	chitin synthase	FALSE	FALSE	FALSE
Anogam_AGAP001749	-0.34283502405727	0.229369996697471	-1.49468120937132	0.134997660584698	0.461276504144301	Female vs Male Oenocytes	Female Oenocytes	1993.67	Male Oenocytes	2598.1	Stromal cell-derived factor 2	FALSE	FALSE	FALSE
Anogam_AGAP001750	0.49013526921602	2.46021424494793	0.19922462859587	0.842087034727898	NA	Female vs Male Oenocytes	Female Oenocytes	2.27017	Male Oenocytes	1.65141		FALSE	FALSE	FALSE
Anogam_AGAP001751	0.195549250212463	0.217188883962981	0.900364911151683	0.367926087633121	0.739765029791797	Female vs Male Oenocytes	Female Oenocytes	1485.87	Male Oenocytes	1331.37	Oxidation resistance protein	FALSE	FALSE	FALSE
Anogam_AGAP001752	-0.52893398699371	0.416251160589165	-1.27070873807307	0.203832285811619	0.574251755376255	Female vs Male Oenocytes	Female Oenocytes	82.9766	Male Oenocytes	123.684	SNF related kinase	FALSE	FALSE	FALSE
Anogam_AGAP001753	-0.323182213447505	1.02523406428431	-0.315227736480947	0.752588747631431	0.936113323053104	Female vs Male Oenocytes	Female Oenocytes	33.5742	Male Oenocytes	43.1074	15-hydroxyprostaglandin dehydrogenase (NAD)	FALSE	FALSE	FALSE
Anogam_AGAP001754	0.161457821557996	0.450370096534479	0.35850031518608	0.719968932051559	0.924235785886628	Female vs Male Oenocytes	Female Oenocytes	474.835	Male Oenocytes	431.054	nucleoprotein TPR	FALSE	FALSE	FALSE
Anogam_AGAP001756	-1.01022781742977	0.854530577558194	-1.18220206972169	0.237125531609021	0.614396647177603	Female vs Male Oenocytes	Female Oenocytes	24.068	Male Oenocytes	50.3261	solute carrier family 442C member 3	FALSE	FALSE	FALSE
Anogam_AGAP001757	-0.339669443856089	0.341056871730935	-0.995931975016938	0.31928319808861	0.698565001881251	Female vs Male Oenocytes	Female Oenocytes	245.326	Male Oenocytes	319.191		FALSE	FALSE	FALSE
Anogam_AGAP001759	0.126807725040007	0.241127262154108	0.525895429273204	0.598960864850441	0.874214825117338	Female vs Male Oenocytes	Female Oenocytes	2017.8	Male Oenocytes	1891.89	protein transport protein SEC23	FALSE	FALSE	FALSE
Anogam_AGAP001760	-0.888669388372888	0.466786098199595	-1.90380431593937	0.0569356742373328	0.285971086396396	Female vs Male Oenocytes	Female Oenocytes	2037.1	Male Oenocytes	3932.57	protein phosphatase 32C regulatory subunit	FALSE	FALSE	FALSE
Anogam_AGAP001761	0.43836079349885	0.442286196994776	0.991124743384265	0.321624672236973	0.700375061990893	Female vs Male Oenocytes	Female Oenocytes	1705.36	Male Oenocytes	1275.52	ceramide synthetase	FALSE	FALSE	FALSE
Anogam_AGAP001762	-0.512423085888585	0.306847176328906	-1.66996187489542	0.0949269069338626	0.382716404500391	Female vs Male Oenocytes	Female Oenocytes	752.274	Male Oenocytes	1111.24	APG9 autophagy related gene	FALSE	FALSE	FALSE
Anogam_AGAP001763	0.282689918869242	0.469682192387282	0.601874892110337	0.547257418425014	0.847624275478378	Female vs Male Oenocytes	Female Oenocytes	3201.39	Male Oenocytes	2731.77	solute carrier family 27 (fatty acid transporter)2C member 1-4	FALSE	FALSE	FALSE
Anogam_AGAP001764	-4.9822858113877	2.38084535893641	-2.09265410400843	0.0363800430651631	NA	Female vs Male Oenocytes	Female Oenocytes	0.362895	Male Oenocytes	12.9893	pancreatic triacylglycerol lipase	FALSE	FALSE	FALSE
Anogam_AGAP001765	-0.981693672889975	0.397494837938533	-2.46970168966516	0.013522576533817	0.117883956778717	Female vs Male Oenocytes	Female Oenocytes	154.118	Male Oenocytes	310.799	golgin subfamily A member 1	FALSE	FALSE	FALSE
Anogam_AGAP001766	-0.599385234839228	1.14931908164911	-0.521513341603268	0.602009213973125	0.876114474158412	Female vs Male Oenocytes	Female Oenocytes	15.4547	Male Oenocytes	23.7841	beat protein	FALSE	FALSE	FALSE
Anogam_AGAP001767	-6.76790350054693	1.3309868445092	-5.08487632951969	3.67865686116573e-07	3.14571531253971e-05	Female vs Male Oenocytes	Female Oenocytes	0.764333	Male Oenocytes	82.0457	Peptidase (mitochondrial processing) beta	FALSE	TRUE	TRUE
Anogam_AGAP001768	-2.91468225159291	0.653930847310555	-4.4571719832154	8.30479742915383e-06	0.000420445863875967	Female vs Male Oenocytes	Female Oenocytes	54.6891	Male Oenocytes	425.108	gamma-interferon-inducible lysosomal thiol reductase	FALSE	TRUE	TRUE
Anogam_AGAP001769	-1.43478720301292	0.608888070225172	-2.35640550895064	0.0184527616179969	0.145112289199951	Female vs Male Oenocytes	Female Oenocytes	36.9679	Male Oenocytes	102.863	beat protein	FALSE	FALSE	FALSE
Anogam_AGAP001773	0.190696908975358	0.745397532318265	0.25583249300849	0.798080182822074	0.951741115809819	Female vs Male Oenocytes	Female Oenocytes	35.4229	Male Oenocytes	31.4463	GPRALS2 putative allatostatin receptor 2	FALSE	FALSE	FALSE
Anogam_AGAP001774	-1.23396113827818	4.0804728567969	-0.302406407684529	0.762342270655386	NA	Female vs Male Oenocytes	Female Oenocytes	0	Male Oenocytes	0.558928	allatostatin receptor	FALSE	FALSE	FALSE
Anogam_AGAP001775	0.219111806233127	0.33115825796108	0.661652853177161	0.508193726639681	0.833351303466939	Female vs Male Oenocytes	Female Oenocytes	209.498	Male Oenocytes	184.09	ABCC2 ATP-binding cassette transporter (ABC transporter) family C member 2	FALSE	FALSE	FALSE
Anogam_AGAP001776	0.922348534869626	2.32265591724717	0.397109416001144	0.691286776664991	NA	Female vs Male Oenocytes	Female Oenocytes	3.67467	Male Oenocytes	2.0001		FALSE	FALSE	FALSE
Anogam_AGAP001777	-0.240797942065376	0.287527268725093	-0.837478626403276	0.40232358612221	0.764970393048846	Female vs Male Oenocytes	Female Oenocytes	248.434	Male Oenocytes	302.658	ABCC1 ATP-binding cassette transporter (ABC transporter) family C member 1	FALSE	FALSE	FALSE
Anogam_AGAP001778	-0.0369719254265015	0.294294888055442	-0.125628840075321	0.900025732736573	0.978284144650082	Female vs Male Oenocytes	Female Oenocytes	156.11	Male Oenocytes	164.872		FALSE	FALSE	FALSE
Anogam_AGAP001779	0.160940043044338	0.515151555842712	0.312413000056001	0.75472667184119	0.936882568620485	Female vs Male Oenocytes	Female Oenocytes	127.145	Male Oenocytes	115.793		FALSE	FALSE	FALSE
Anogam_AGAP001780	0.00403388202282477	0.222188003986072	0.0181552646878166	0.985514990355455	0.996443937093694	Female vs Male Oenocytes	Female Oenocytes	459.301	Male Oenocytes	470.353	E3 ubiquitin-protein ligase EDD1	FALSE	FALSE	FALSE
Anogam_AGAP001781	0.678593272504801	0.866574330751756	0.783075667515006	0.433582679001983	0.787822259833124	Female vs Male Oenocytes	Female Oenocytes	37.6966	Male Oenocytes	24.4556		FALSE	FALSE	FALSE
Anogam_AGAP001782	0.669209936570655	0.533498607367564	1.25437991276628	0.209703950166404	0.581873460568008	Female vs Male Oenocytes	Female Oenocytes	294.141	Male Oenocytes	189.457		FALSE	FALSE	FALSE
Anogam_AGAP001783	0.656349246755922	0.452095668936968	1.45179282141593	0.146559220543198	0.481869652086017	Female vs Male Oenocytes	Female Oenocytes	204.274	Male Oenocytes	131.521	microtubule-severing ATPase	FALSE	FALSE	FALSE
Anogam_AGAP001786	0.21874941776812	0.28294976878135	0.773103362869893	0.439461211060301	0.791789699579447	Female vs Male Oenocytes	Female Oenocytes	1407.26	Male Oenocytes	1236.43	AT-rich interactive domain-containing protein 1	FALSE	FALSE	FALSE
Anogam_AGAP001787	0.318018292622717	0.323790152557844	0.982174072035448	0.32601409870063	0.704392709387135	Female vs Male Oenocytes	Female Oenocytes	341.927	Male Oenocytes	284.037		FALSE	FALSE	FALSE
Anogam_AGAP001788	0.834417576469652	0.481081550730974	1.73446180840193	0.0828361765054273	0.356980075824222	Female vs Male Oenocytes	Female Oenocytes	350.239	Male Oenocytes	204.565	M-type 9 protein	FALSE	FALSE	FALSE
Anogam_AGAP001789	0.523650278213939	0.867198219327802	0.603841505370986	0.545949021786982	0.846796513398147	Female vs Male Oenocytes	Female Oenocytes	35.768	Male Oenocytes	26.0961	(methionine synthase) reductase	FALSE	FALSE	FALSE
Anogam_AGAP001790	-0.620472143883834	0.329543345147226	-1.88282407464982	0.0597242133184372	0.293036486353765	Female vs Male Oenocytes	Female Oenocytes	669.572	Male Oenocytes	1049.75	p21-activated kinase 1	FALSE	FALSE	FALSE
Anogam_AGAP001791	0.673875739256541	0.55402854990931	1.21631951885304	0.223863228867965	0.599669243624575	Female vs Male Oenocytes	Female Oenocytes	915.399	Male Oenocytes	597.533	Nep2 neprilysin2C neutral endopeptidase 2	FALSE	FALSE	FALSE
Anogam_AGAP001792	0.154499114266777	0.481989692395256	0.32054443633222	0.748555650544354	0.93466282935033	Female vs Male Oenocytes	Female Oenocytes	259.099	Male Oenocytes	241.049		FALSE	FALSE	FALSE
Anogam_AGAP001793	0.626685960679062	1.34250421095684	0.466803720662006	0.640640313642162	0.894690215822352	Female vs Male Oenocytes	Female Oenocytes	17.1451	Male Oenocytes	11.1624	aurora kinase A	FALSE	FALSE	FALSE
Anogam_AGAP001794	0.389019326326097	0.384821248874276	1.01090916227756	0.312059908385344	0.693799787574669	Female vs Male Oenocytes	Female Oenocytes	269.948	Male Oenocytes	210.405		FALSE	FALSE	FALSE
Anogam_AGAP001795	0.123509647169665	0.304255379417848	0.405940717978377	0.684786159083404	0.909828118944494	Female vs Male Oenocytes	Female Oenocytes	296.53	Male Oenocytes	281.496	mortality factor 4-like protein 1	FALSE	FALSE	FALSE
Anogam_AGAP001796	1.4463486009143	0.453149538375046	3.1917688939964	0.00141404423614697	0.0255129683458006	Female vs Male Oenocytes	Female Oenocytes	145.23	Male Oenocytes	54.7677		FALSE	FALSE	FALSE
Anogam_AGAP001797	0.563562144016017	0.376196240592542	1.49805363054229	0.134119317108106	0.459218765441482	Female vs Male Oenocytes	Female Oenocytes	1302.28	Male Oenocytes	897.492	Tropomyosin 1	FALSE	FALSE	FALSE
Anogam_AGAP001798	-0.124035847032897	1.08553674289203	-0.114262228197314	NA	NA	Female vs Male Oenocytes	Female Oenocytes	258.221	Male Oenocytes	277.255		FALSE	FALSE	FALSE
Anogam_AGAP001799	3.56501975027404	1.1382133371465	3.13211911504354	NA	NA	Female vs Male Oenocytes	Female Oenocytes	161.284	Male Oenocytes	14.4065	tropomyosin 1	FALSE	FALSE	FALSE
Anogam_AGAP001800	0.707205326679597	1.00338973573336	0.704816186068229	0.480924634317125	0.818920200399614	Female vs Male Oenocytes	Female Oenocytes	82.7417	Male Oenocytes	50.7744	Synaptotagmin	FALSE	FALSE	FALSE
Anogam_AGAP001801	0.00212907032888712	0.439497466647668	0.00484432901314976	0.996134799790744	0.998820146928986	Female vs Male Oenocytes	Female Oenocytes	239.36	Male Oenocytes	246.676	DTW domain-containing protein 2	FALSE	FALSE	FALSE
Anogam_AGAP001802	-0.453253781005984	0.22588512919246	-2.00656759754999	0.044795724360846	0.247237832378656	Female vs Male Oenocytes	Female Oenocytes	1055.6	Male Oenocytes	1488.7	mitofusin	FALSE	FALSE	FALSE
Anogam_AGAP001803	0.58177260516219	0.383078376391024	1.51867774590427	0.128843630879989	0.450709105477749	Female vs Male Oenocytes	Female Oenocytes	97.7522	Male Oenocytes	66.8218		FALSE	FALSE	FALSE
Anogam_AGAP001804	0.131789259153168	0.319985503899499	0.411860092245181	0.680441973054767	0.909794033789489	Female vs Male Oenocytes	Female Oenocytes	598.171	Male Oenocytes	562.207	Nmt N-myristoyl transferase	FALSE	FALSE	FALSE
Anogam_AGAP001805	0.629186956676364	0.221096385240761	2.84575867665686	0.00443057576308164	0.0564875715121494	Female vs Male Oenocytes	Female Oenocytes	6224.72	Male Oenocytes	4152.1	RpL13 60S ribosomal protein L13	FALSE	FALSE	FALSE
Anogam_AGAP001806	-0.855711748075579	0.475391568968916	-1.80001456469147	0.0718583384866028	0.327759055329301	Female vs Male Oenocytes	Female Oenocytes	506.562	Male Oenocytes	951.17		FALSE	FALSE	FALSE
Anogam_AGAP001807	-0.634555823947912	1.49556095803084	-0.424292851816225	0.671352251696	0.906987899002107	Female vs Male Oenocytes	Female Oenocytes	6.65164	Male Oenocytes	10.4372	GPRGPH putative glycoprotein hormone gph-like receptor	FALSE	FALSE	FALSE
Anogam_AGAP001809	-3.40867343077856	1.82234562049604	-1.87048680142832	0.0614162481507854	NA	Female vs Male Oenocytes	Female Oenocytes	1.13942	Male Oenocytes	11.875	tetratricopeptide repeat domain 26	FALSE	FALSE	FALSE
Anogam_AGAP001810	-0.407464767343304	0.40290002139312	-1.01132972377216	0.311858644261617	0.693557758945651	Female vs Male Oenocytes	Female Oenocytes	633.814	Male Oenocytes	872.958	DnaJ homolog subfamily B	FALSE	FALSE	FALSE
Anogam_AGAP001811	2.30640859206235	1.41844473362006	1.62601230586975	0.103947037553433	0.400761172598961	Female vs Male Oenocytes	Female Oenocytes	34.7367	Male Oenocytes	7.52566	IR75h.1 ionotropic receptor IR75h.1	FALSE	FALSE	FALSE
Anogam_AGAP001812	0.731143692265099	1.07878642761928	0.677746469130708	0.497932457332126	0.828476240322386	Female vs Male Oenocytes	Female Oenocytes	42.5633	Male Oenocytes	26.8247	IR75h.2 ionotropic receptor IR75h.2	FALSE	FALSE	FALSE
Anogam_AGAP001813	-0.162751232664396	0.179854594804288	-0.904904502670599	0.365515981427087	0.737262760555408	Female vs Male Oenocytes	Female Oenocytes	3647.55	Male Oenocytes	4204.28	Histone H3	FALSE	FALSE	FALSE
Anogam_AGAP001814	0.337319666434083	0.936221092747974	0.360299152675561	0.718623432897252	0.923767040515074	Female vs Male Oenocytes	Female Oenocytes	28.0224	Male Oenocytes	22.7581	cytosolic carboxypeptidase 6	FALSE	FALSE	FALSE
Anogam_AGAP001815	-0.316228364649575	0.790528704643059	-0.400021356330583	0.689140787048818	0.911414195884561	Female vs Male Oenocytes	Female Oenocytes	20.2541	Male Oenocytes	25.8163		FALSE	FALSE	FALSE
Anogam_AGAP001816	-0.244348301826418	0.346131842394777	-0.705939968238256	0.480225470749059	0.818418085805128	Female vs Male Oenocytes	Female Oenocytes	159.172	Male Oenocytes	194.176	homeobox prox 1	FALSE	FALSE	FALSE
Anogam_AGAP001817	1.28202902968128	0.580394210693918	2.20889355210571	0.0271820458002168	0.184649197638856	Female vs Male Oenocytes	Female Oenocytes	108.222	Male Oenocytes	46.3531		FALSE	FALSE	FALSE
Anogam_AGAP001818	-0.0315109149921433	0.382935113215286	-0.0822878704633905	0.9344177996763	0.986796667684247	Female vs Male Oenocytes	Female Oenocytes	181.465	Male Oenocytes	191.523	homeobox prox 1	FALSE	FALSE	FALSE
Anogam_AGAP001819	-4.96263747300043	1.56071720453172	-3.179716004021	0.00147419452781624	0.0264109216814402	Female vs Male Oenocytes	Female Oenocytes	6.86544	Male Oenocytes	219.858		FALSE	FALSE	FALSE
Anogam_AGAP001820	-0.25421462331333	0.26578105881202	-0.956481340128639	0.338829107306861	0.713319388461768	Female vs Male Oenocytes	Female Oenocytes	352.919	Male Oenocytes	432.051	TATA-binding protein-associated factor	FALSE	FALSE	FALSE
Anogam_AGAP001821	0.104822326845714	0.591090077667462	0.177337314237045	0.859243442731789	0.965980865262181	Female vs Male Oenocytes	Female Oenocytes	117.014	Male Oenocytes	110.895		FALSE	FALSE	FALSE
Anogam_AGAP001822	-0.890077681571079	3.87784884885499	-0.229528719726632	0.818458001266607	NA	Female vs Male Oenocytes	Female Oenocytes	1.14646	Male Oenocytes	2.0701		FALSE	FALSE	FALSE
Anogam_AGAP001823	-0.621713661636469	0.483032349915345	-1.28710563949895	0.198057470078298	0.566207535890885	Female vs Male Oenocytes	Female Oenocytes	957.496	Male Oenocytes	1537.18	VATG V-type H+-transporting ATPase subunit G	FALSE	FALSE	FALSE
Anogam_AGAP001824	-0.264751693458422	0.903039096472134	-0.293178550621691	0.769385678235365	0.940565672960485	Female vs Male Oenocytes	Female Oenocytes	13.4181	Male Oenocytes	16.5792		FALSE	FALSE	FALSE
Anogam_AGAP001825	NA	NA	NA	NA	NA	Female vs Male Oenocytes	Female Oenocytes	0	Male Oenocytes	0	salivary lipase	FALSE	FALSE	FALSE
Anogam_AGAP001826	-0.668669031943237	0.316595361995051	-2.11206199525339	0.0346811321913613	0.212215995898552	Female vs Male Oenocytes	Female Oenocytes	4394.94	Male Oenocytes	7170.03	Lp lipophorin	FALSE	FALSE	FALSE
Anogam_AGAP001827	-0.0231923043241161	0.332132284459948	-0.0698285153514271	0.944330150600186	0.988733780482302	Female vs Male Oenocytes	Female Oenocytes	1733.29	Male Oenocytes	1796.03	hypoxia up-regulated 1	FALSE	FALSE	FALSE
Anogam_AGAP001828	-0.708860972034289	0.412282059985549	-1.71935924657778	0.0855489780657592	0.362727666998819	Female vs Male Oenocytes	Female Oenocytes	61.5059	Male Oenocytes	103.883		FALSE	FALSE	FALSE
Anogam_AGAP001854	0.620006985564059	0.628852043740535	0.985934595801161	0.324165208791713	0.702483803648401	Female vs Male Oenocytes	Female Oenocytes	55.2549	Male Oenocytes	37.344	N-glycosylase-DNA lyase	FALSE	FALSE	FALSE
Anogam_AGAP001856	0.813332279712334	0.453647760832929	1.79287180480953	0.0729934246508094	0.329978271544485	Female vs Male Oenocytes	Female Oenocytes	405.955	Male Oenocytes	234.344	PER period circadian protein	FALSE	FALSE	FALSE
Anogam_AGAP001858	0.21394942419325	0.840391902333782	0.254582919705805	0.799045252702831	0.952452207040413	Female vs Male Oenocytes	Female Oenocytes	490.094	Male Oenocytes	419.488	ABCG3 ATP-binding cassette transporter (ABC transporter) family G member 3	FALSE	FALSE	FALSE
Anogam_AGAP001859	0.0229497913251552	0.266771349307167	0.0860279463471556	0.931444201600617	0.98614442154066	Female vs Male Oenocytes	Female Oenocytes	414.724	Male Oenocytes	419.04	DnaJ homolog subfamily B member 14	FALSE	FALSE	FALSE
Anogam_AGAP001861	0.0171126955511834	2.97083148420177	0.00576023771196209	0.99540402067911	NA	Female vs Male Oenocytes	Female Oenocytes	2.56704	Male Oenocytes	2.56504	CYP4H14 cytochrome P450	FALSE	FALSE	FALSE
Anogam_AGAP001862	-2.30589937344931	4.02387505139452	-0.573054417445238	0.566607849220618	NA	Female vs Male Oenocytes	Female Oenocytes	0	Male Oenocytes	1.03614	GPRNNA1 putative GPCR class a orphan receptor 1	FALSE	FALSE	FALSE
Anogam_AGAP001863	NA	NA	NA	NA	NA	Female vs Male Oenocytes	Female Oenocytes	0	Male Oenocytes	0		FALSE	FALSE	FALSE
Anogam_AGAP001864	1.43594462698719	1.35728582805655	1.05795300982643	0.29007686593671	0.671312379851315	Female vs Male Oenocytes	Female Oenocytes	56.1611	Male Oenocytes	21.69	CYP4H15 cytochrome P450	FALSE	FALSE	FALSE
Anogam_AGAP001865	0.0680189054670857	0.305615134822823	0.22256392997853	0.823874912006799	0.957057454177612	Female vs Male Oenocytes	Female Oenocytes	335.161	Male Oenocytes	327.455	mRpL17 39S ribosomal protein L172C mitochondrial	FALSE	FALSE	FALSE
Anogam_AGAP001866	0.268889475786373	0.451053951759321	0.596135949452561	0.551084410010731	0.849559439964252	Female vs Male Oenocytes	Female Oenocytes	1470.53	Male Oenocytes	1236.97		FALSE	FALSE	FALSE
Anogam_AGAP001867	-0.486806378855695	0.282342845029851	-1.72416757649455	0.0846775955845441	0.360384446954547	Female vs Male Oenocytes	Female Oenocytes	210.514	Male Oenocytes	302.112	mitogen-activated protein kinase kinase 7	FALSE	FALSE	FALSE
Anogam_AGAP001870	0.305099549648741	0.848578018693502	0.359542131574987	0.719189565493212	0.923767040515074	Female vs Male Oenocytes	Female Oenocytes	29.4784	Male Oenocytes	24.7427	solute carrier family 7 (L-type amino acid transporter)2C member 9	FALSE	FALSE	FALSE
Anogam_AGAP001871	-0.200647969493945	0.35604962311944	-0.563539339646026	0.573067679852231	0.860024724766529	Female vs Male Oenocytes	Female Oenocytes	449.396	Male Oenocytes	534.63	Ro ribonucleoprotein autoantigen	FALSE	FALSE	FALSE
Anogam_AGAP001872	-0.0539058495435089	0.301724185013643	-0.178659359179549	0.858205182342937	0.965980865262181	Female vs Male Oenocytes	Female Oenocytes	617.584	Male Oenocytes	659.584	U3 small nucleolar RNA-associated protein 19	FALSE	FALSE	FALSE
Anogam_AGAP001873	-0.940796333231457	0.362092806651837	-2.59821878796963	0.00937087653810519	0.0941548259680818	Female vs Male Oenocytes	Female Oenocytes	1417.62	Male Oenocytes	2805.94		FALSE	FALSE	FALSE
Anogam_AGAP001874	0.0175681086712044	0.406979515365698	0.0431670588025009	0.965568363867721	0.993361316512332	Female vs Male Oenocytes	Female Oenocytes	2722.04	Male Oenocytes	2732.01	Ras-related protein Rap-1A	FALSE	FALSE	FALSE
Anogam_AGAP001877	-0.121739353490342	0.379062301983291	-0.321159220670032	0.748089733677275	0.934449388092028	Female vs Male Oenocytes	Female Oenocytes	179.446	Male Oenocytes	198.89		FALSE	FALSE	FALSE
Anogam_AGAP001878	-0.000921909121522064	0.293931108039744	-0.00313648027141587	0.99749745491931	0.998820146928986	Female vs Male Oenocytes	Female Oenocytes	328.614	Male Oenocytes	338.206	peptide alpha-N-acetyltransferase	FALSE	FALSE	FALSE
Anogam_AGAP001879	0.512776532495585	0.33725614439565	1.52043644279472	0.128401321166826	0.449935208055655	Female vs Male Oenocytes	Female Oenocytes	245.24	Male Oenocytes	177.226	pre-mRNA-splicing factor CLF1	FALSE	FALSE	FALSE
Anogam_AGAP001880	-0.659311746427532	1.07101836906126	-0.615593313311154	0.538162965576612	0.844605768286161	Female vs Male Oenocytes	Female Oenocytes	14.0954	Male Oenocytes	22.5367	bZIP factor2C other	FALSE	FALSE	FALSE
Anogam_AGAP001881	-3.83301188612436	1.54430181705862	-2.48203546987011	NA	NA	Female vs Male Oenocytes	Female Oenocytes	12.5906	Male Oenocytes	175.682	protease m1 zinc metalloprotease	FALSE	FALSE	FALSE
Anogam_AGAP001882	0.170015512250942	0.550601142157498	0.308781619276608	0.757487652043569	0.93716002098626	Female vs Male Oenocytes	Female Oenocytes	112.735	Male Oenocytes	101.899	E3 ubiquitin-protein ligase NRDP1	FALSE	FALSE	FALSE
Anogam_AGAP001883	0.27363165920929	0.326569301391994	0.837897677592296	0.402088173219039	0.764970393048846	Female vs Male Oenocytes	Female Oenocytes	466.79	Male Oenocytes	396.818	ELAV (embryonic lethal2C abnormal vision Drosophila)-like	FALSE	FALSE	FALSE
Anogam_AGAP001884	0.706054155678943	0.35174841312761	2.00727033677561	0.0447208858414813	0.247210847665125	Female vs Male Oenocytes	Female Oenocytes	1523.98	Male Oenocytes	965.729	fumarate hydratase2C class II	FALSE	FALSE	FALSE
Anogam_AGAP001885	0.601149365407661	0.558968072531392	1.07546279465523	0.282167580888996	0.664005740851409	Female vs Male Oenocytes	Female Oenocytes	100.58	Male Oenocytes	67.8088	WD repeat-containing protein 79	FALSE	FALSE	FALSE
Anogam_AGAP001886	-0.461577015214852	0.51844697393368	-0.890307087169722	0.373301016677087	0.74421055469855	Female vs Male Oenocytes	Female Oenocytes	1383.98	Male Oenocytes	1925.05		FALSE	FALSE	FALSE
Anogam_AGAP001887	0.245462863809159	0.410493412106235	0.59797028787793	0.549859758614192	0.849070243347195	Female vs Male Oenocytes	Female Oenocytes	141.033	Male Oenocytes	123.582	biogenesis of lysosome-related organelles complex 1 subunit 1	FALSE	FALSE	FALSE
Anogam_AGAP001888	-0.282576556126017	0.365536189524735	-0.773046730320791	0.439494725286987	0.791789699579447	Female vs Male Oenocytes	Female Oenocytes	547.025	Male Oenocytes	686.844	Alpha-(12C6)-fucosyltransferase	FALSE	FALSE	FALSE
Anogam_AGAP001889	-0.692029883069292	0.801551179835741	-0.863363314131865	0.387937743191313	0.754954001666629	Female vs Male Oenocytes	Female Oenocytes	3819.57	Male Oenocytes	6489.68		FALSE	FALSE	FALSE
Anogam_AGAP001890	-2.89410321064119	0.62169321414026	-4.65519511041061	3.23674049055831e-06	0.000204578082185847	Female vs Male Oenocytes	Female Oenocytes	587.653	Male Oenocytes	4544.88		FALSE	TRUE	TRUE
Anogam_AGAP001891	-0.0956252143714832	0.362745133329518	-0.263615430188603	0.792076267427881	0.950344718782426	Female vs Male Oenocytes	Female Oenocytes	533.092	Male Oenocytes	586.557	arrestin domain-containing protein 3	FALSE	FALSE	FALSE
Anogam_AGAP001892	-0.492934940031481	0.537421737728133	-0.917221811896347	0.359026419285048	0.731568450669733	Female vs Male Oenocytes	Female Oenocytes	141.444	Male Oenocytes	201.678	arrestin domain-containing protein 3	FALSE	FALSE	FALSE
Anogam_AGAP001893	-0.173690835018977	0.829449184958204	-0.209405034291195	0.834132063088799	0.960404958780758	Female vs Male Oenocytes	Female Oenocytes	61.9194	Male Oenocytes	70.301		FALSE	FALSE	FALSE
Anogam_AGAP001894	0.711645801038172	0.320067484480907	2.22342423252502	0.0261872071901482	0.1810623847236	Female vs Male Oenocytes	Female Oenocytes	653.709	Male Oenocytes	410.279	arrestin domain-containing protein 3	FALSE	FALSE	FALSE
Anogam_AGAP001895	-0.0738328965203584	0.385747233998574	-0.191402270743518	0.84821044115865	0.96473911080968	Female vs Male Oenocytes	Female Oenocytes	559.629	Male Oenocytes	602.09	F-box and leucine-rich repeat protein 10-11	FALSE	FALSE	FALSE
Anogam_AGAP001896	-0.652020642327281	0.284979153375427	-2.28795908263619	0.0221399040660521	0.16278588423132	Female vs Male Oenocytes	Female Oenocytes	2362.25	Male Oenocytes	3825.7		FALSE	FALSE	FALSE
Anogam_AGAP001897	1.93995616072338	1.39751333774763	1.38814858386253	0.165091805049767	0.516147856143342	Female vs Male Oenocytes	Female Oenocytes	25.604	Male Oenocytes	7.08498	centromere protein J	FALSE	FALSE	FALSE
Anogam_AGAP001898	0.529191986446104	0.315313422461117	1.67830466053617	0.0932876386947072	0.379566178071707	Female vs Male Oenocytes	Female Oenocytes	376.293	Male Oenocytes	269.174	mRpL44 39S ribosomal protein L442C mitochondrial	FALSE	FALSE	FALSE
Anogam_AGAP001899	0.171119800282178	0.694669964119455	0.246332516332537	0.805424840889182	0.95371184611553	Female vs Male Oenocytes	Female Oenocytes	105057	Male Oenocytes	97838.5	fatty acid synthase2C animal type	FALSE	FALSE	FALSE
Anogam_AGAP001900	0.0377552941859136	0.574425159265276	0.0657270900776785	0.94759510427904	0.989543230674618	Female vs Male Oenocytes	Female Oenocytes	63.1067	Male Oenocytes	63.7569	de-etiolated-1	FALSE	FALSE	FALSE
Anogam_AGAP001901	-0.22294289256749	1.38457874326306	-0.161018572365249	0.872078772876524	0.969469799138735	Female vs Male Oenocytes	Female Oenocytes	15.9636	Male Oenocytes	19.6059	DNA helicase MCM9	FALSE	FALSE	FALSE
Anogam_AGAP001902	-0.467648327698474	0.250488668483515	-1.86694404393487	0.0619094023690119	0.29928541545165	Female vs Male Oenocytes	Female Oenocytes	848.417	Male Oenocytes	1211.91	Rheb GTP-binding protein Rheb	FALSE	FALSE	FALSE
Anogam_AGAP001903	-0.397450181551092	0.347650475222492	-1.14324647851187	0.252936269735057	0.633095389970085	Female vs Male Oenocytes	Female Oenocytes	5345.68	Male Oenocytes	7309.48	Mdh2 NAD-dependent malate dehydrogenase	FALSE	FALSE	FALSE
Anogam_AGAP001905	-0.465126371509111	0.353627849020359	-1.31529904332374	0.188409419534737	0.553320130789462	Female vs Male Oenocytes	Female Oenocytes	833.287	Male Oenocytes	1178	zinc finger RNA-binding protein	FALSE	FALSE	FALSE
Anogam_AGAP001907	-0.742165924900285	0.44496492045038	-1.6679200781695	0.0953315933204825	0.383284983654378	Female vs Male Oenocytes	Female Oenocytes	114.548	Male Oenocytes	198.074		FALSE	FALSE	FALSE
Anogam_AGAP001908	0.169133307308379	0.445302708820762	0.379816479797019	0.704081648371703	0.918589906737094	Female vs Male Oenocytes	Female Oenocytes	224.928	Male Oenocytes	206.742	glyceronephosphate O-acyltransferase	FALSE	FALSE	FALSE
Anogam_AGAP001909	-0.371167394864865	0.512036337224277	-0.724884872188847	0.46852266224826	0.809992686186527	Female vs Male Oenocytes	Female Oenocytes	111.188	Male Oenocytes	149.178		FALSE	FALSE	FALSE
Anogam_AGAP001910	0.630026951169415	0.300459916854228	2.09687520973082	0.0360046235637919	0.217309044712424	Female vs Male Oenocytes	Female Oenocytes	4651.71	Male Oenocytes	3115.94	RpS3 40S ribosomal protein S3	FALSE	FALSE	FALSE
Anogam_AGAP001911	0.526575180458271	0.243023000422385	2.16677096218489	0.0302523226243203	0.196890434552674	Female vs Male Oenocytes	Female Oenocytes	9229.24	Male Oenocytes	6601.01	RpL6 60S ribosomal protein L6	FALSE	FALSE	FALSE
Anogam_AGAP001912	-2.36688802233558	2.03880022121096	-1.16092199604028	0.245673622795949	NA	Female vs Male Oenocytes	Female Oenocytes	0.745953	Male Oenocytes	3.95787	Or8 odorant receptor 8	FALSE	FALSE	FALSE
Anogam_AGAP001913	-5.7115836396961	1.69656975778122	-3.36654806765254	0.000761153156507941	0.016272047312237	Female vs Male Oenocytes	Female Oenocytes	0.721511	Male Oenocytes	39.3431	histamine-gated chloride channel	FALSE	FALSE	FALSE
Anogam_AGAP001914	-0.541305854444035	0.241298564981648	-2.24330324751498	0.0248772661048376	0.175508579491833	Female vs Male Oenocytes	Female Oenocytes	764.736	Male Oenocytes	1145.97	cell division cycle protein 37	FALSE	FALSE	FALSE
Anogam_AGAP001915	-3.04458000189334	2.0042439944383	-1.51906654596044	0.12874574644238	NA	Female vs Male Oenocytes	Female Oenocytes	1.4475	Male Oenocytes	12.3693	Gr24 gustatory receptor 24	FALSE	FALSE	FALSE
Anogam_AGAP001916	2.49700838636085	0.908972001423411	2.74706853726038	0.00601305675076227	0.0687515342648953	Female vs Male Oenocytes	Female Oenocytes	27.8712	Male Oenocytes	5.20097		FALSE	FALSE	FALSE
Anogam_AGAP001917	0.246062409249742	0.310043440699753	0.793638493671696	0.427405916201941	0.784680829969477	Female vs Male Oenocytes	Female Oenocytes	146.695	Male Oenocytes	126.755	Male specific lethal 3	FALSE	FALSE	FALSE
Anogam_AGAP001918	0.129513708174343	0.272362166758971	0.475520185918324	0.634416248914344	0.891441556055284	Female vs Male Oenocytes	Female Oenocytes	368.385	Male Oenocytes	346.521	microfibrillar-associated protein 1	FALSE	FALSE	FALSE
Anogam_AGAP001919	-0.716581424907639	0.221933235854543	-3.2288152882937	0.00124304153313037	0.0232095241121738	Female vs Male Oenocytes	Female Oenocytes	8936.38	Male Oenocytes	15101.2	protein disulfide-isomerase A6	FALSE	FALSE	FALSE
Anogam_AGAP001923	-0.710512233169886	0.363487958152395	-1.95470638637222	0.050617735871329	0.266331995980685	Female vs Male Oenocytes	Female Oenocytes	184.188	Male Oenocytes	310.099	solute carrier family 38 (sodium-coupled neutral amino acid transporter)	FALSE	FALSE	FALSE
Anogam_AGAP001924	-2.28652636919754	3.89733923414355	-0.586689079863998	0.557412543178148	NA	Female vs Male Oenocytes	Female Oenocytes	0.758278	Male Oenocytes	3.59328		FALSE	FALSE	FALSE
Anogam_AGAP001925	0.223458143630846	2.2145318986897	0.100905362331002	0.919625586313229	NA	Female vs Male Oenocytes	Female Oenocytes	7.73298	Male Oenocytes	6.55512		FALSE	FALSE	FALSE
Anogam_AGAP001928	0.755931264006816	0.239696826459889	3.15369742341296	0.0016121614239945	0.0281878945886049	Female vs Male Oenocytes	Female Oenocytes	1898.26	Male Oenocytes	1154.74	nucleosome assembly protein 1-like 1	FALSE	FALSE	FALSE
Anogam_AGAP001929	2.60603921858695	0.70463738838041	3.69841178109617	0.000216952726758449	0.00590297044784485	Female vs Male Oenocytes	Female Oenocytes	179.456	Male Oenocytes	30.3253	DNA polymerase alpha subunit A	FALSE	FALSE	FALSE
Anogam_AGAP001930	0.666750789944889	0.477605538167368	1.3960281794539	0.162706009519948	0.512440839639429	Female vs Male Oenocytes	Female Oenocytes	2692.05	Male Oenocytes	1719.04	heterogeneous nuclear ribonucleoprotein 27C	FALSE	FALSE	FALSE
Anogam_AGAP001931	NA	NA	NA	NA	NA	Female vs Male Oenocytes	Female Oenocytes	0	Male Oenocytes	0	Six-cysteine containing astacin protease 3	FALSE	FALSE	FALSE
Anogam_AGAP001932	3.93564461318979	3.93279566749369	1.00072440725046	0.3169600641464	NA	Female vs Male Oenocytes	Female Oenocytes	3.70495	Male Oenocytes	0	metalloendopeptidase	FALSE	FALSE	FALSE
Anogam_AGAP001933	0.500386965499363	0.748591415142309	0.668438022902304	0.503854031211064	0.83166563205252	Female vs Male Oenocytes	Female Oenocytes	113.664	Male Oenocytes	82.6434	kinase	FALSE	FALSE	FALSE
Anogam_AGAP001934	-0.339600396663617	0.81277878568848	-0.417826354037959	0.676074080956111	0.908114065623983	Female vs Male Oenocytes	Female Oenocytes	17.0603	Male Oenocytes	22.2297		FALSE	FALSE	FALSE
Anogam_AGAP001935	-0.337256249951709	0.735237937181907	-0.4587035473773	0.646447066293949	0.896992814788647	Female vs Male Oenocytes	Female Oenocytes	55.9901	Male Oenocytes	72.033		FALSE	FALSE	FALSE
Anogam_AGAP001936	0.0288421172555483	0.574192365361144	0.0502307571390431	0.959938501830346	0.992414324354932	Female vs Male Oenocytes	Female Oenocytes	104.945	Male Oenocytes	104.136	phosphatidylinositol phospholipase C2C beta	FALSE	FALSE	FALSE
Anogam_AGAP001937	0.578958492727241	0.396370909702449	1.46064829319048	0.144111985825122	0.477837591318487	Female vs Male Oenocytes	Female Oenocytes	310.497	Male Oenocytes	215.329	mRpL33 39S ribosomal protein L332C mitochondrial	FALSE	FALSE	FALSE
Anogam_AGAP001938	0.492050875964436	0.407498965183243	1.20748987851582	0.227243540663556	0.602643276586231	Female vs Male Oenocytes	Female Oenocytes	181.888	Male Oenocytes	132.314	bifunctional lysine-specific demethylase and histidyl-hydroxylase NO66	FALSE	FALSE	FALSE
Anogam_AGAP001939	0.198614141468631	0.21557449247394	0.92132487099623	0.356880839916174	0.729827055262658	Female vs Male Oenocytes	Female Oenocytes	643.697	Male Oenocytes	576.649	maltase	FALSE	FALSE	FALSE
Anogam_AGAP001940	-0.482101061480321	0.402513824718513	-1.19772547394482	0.231023908799558	0.606383156191423	Female vs Male Oenocytes	Female Oenocytes	399.98	Male Oenocytes	580.995		FALSE	FALSE	FALSE
Anogam_AGAP001941	-0.172059021590303	0.573308579265729	-0.300115902348206	0.764088749672492	0.938793828266993	Female vs Male Oenocytes	Female Oenocytes	45.6168	Male Oenocytes	52.7467	phosphatidic acid phosphatase type 2 domain-containing protein 1B	FALSE	FALSE	FALSE
Anogam_AGAP001942	-0.228363613622081	0.431443247131833	-0.529301629218227	0.596596225587584	0.873210690657165	Female vs Male Oenocytes	Female Oenocytes	1168.68	Male Oenocytes	1422.82		FALSE	FALSE	FALSE
Anogam_AGAP001943	0.628494277484466	0.469797230063222	1.33779902746529	0.180961959011264	0.542406154609313	Female vs Male Oenocytes	Female Oenocytes	311.589	Male Oenocytes	204.178		FALSE	FALSE	FALSE
Anogam_AGAP001944	0.0108845215773017	0.531298047314232	0.0204866583499112	0.983655154938708	0.996435391845858	Female vs Male Oenocytes	Female Oenocytes	68.2494	Male Oenocytes	69.517	F-box and WD-40 domain protein 1-11	FALSE	FALSE	FALSE
Anogam_AGAP001945	-0.217457425446456	0.39888995427362	-0.545156435043461	0.585645931197043	0.867093408389511	Female vs Male Oenocytes	Female Oenocytes	661.16	Male Oenocytes	796.101	Uncharacterized protein CG12001	FALSE	FALSE	FALSE
Anogam_AGAP001946	0.369278964678711	0.602151872446983	0.613265492604152	0.539700806249802	0.844922369907383	Female vs Male Oenocytes	Female Oenocytes	115.847	Male Oenocytes	90.6589		FALSE	FALSE	FALSE
Anogam_AGAP001947	0.322902064015347	0.613592073357244	0.526248753913332	0.598715383736445	0.874214825117338	Female vs Male Oenocytes	Female Oenocytes	217.998	Male Oenocytes	175.9	tankyrase	FALSE	FALSE	FALSE
Anogam_AGAP001948	0.0089285147219362	0.420618671232257	0.0212271002991355	0.983064496237762	0.996435391845858	Female vs Male Oenocytes	Female Oenocytes	146.028	Male Oenocytes	150.028	suppressor of fused (Sufu)	FALSE	FALSE	FALSE
Anogam_AGAP001949	-1.31375318042338	0.794324120287084	-1.65392583061504	0.0981425835714924	0.389356308157312	Female vs Male Oenocytes	Female Oenocytes	30.6019	Male Oenocytes	79.6049		FALSE	FALSE	FALSE
Anogam_AGAP001950	0.28154679500982	0.789707056814473	0.356520550981937	0.721450764405288	0.925170006662115	Female vs Male Oenocytes	Female Oenocytes	50.3159	Male Oenocytes	42.8009	membrane-associated tyrosine- and threonine-specific cdc2-inhibitory kinase	FALSE	FALSE	FALSE
Anogam_AGAP001951	-0.633138181488764	0.355782777403555	-1.77956388476504	0.0751473610842209	0.336543443357631	Female vs Male Oenocytes	Female Oenocytes	569.238	Male Oenocytes	912.06	butyryl-CoA dehydrogenase	FALSE	FALSE	FALSE
Anogam_AGAP001952	-6.95667781335152	1.0268562071602	-6.77473414957525	1.24635227766619e-11	3.96340024297849e-09	Female vs Male Oenocytes	Female Oenocytes	11.6977	Male Oenocytes	1474.08	cytosol aminopeptidase	FALSE	TRUE	TRUE
Anogam_AGAP001953	-0.692730770622903	0.422102129766787	-1.64114493098066	0.100767333800502	0.396169247808188	Female vs Male Oenocytes	Female Oenocytes	210.128	Male Oenocytes	351.567	TBC1 domain family2C member 10A	FALSE	FALSE	FALSE
Anogam_AGAP001954	0.166965183229262	0.543718954554947	0.307079938689885	0.758782527087058	0.937786569476298	Female vs Male Oenocytes	Female Oenocytes	235.256	Male Oenocytes	213.702	psidin Phagocyte signaling-impaired protein	FALSE	FALSE	FALSE
Anogam_AGAP001955	-0.389631709217153	0.487152139689155	-0.799815247585225	0.423817847504938	0.781928885806017	Female vs Male Oenocytes	Female Oenocytes	398.715	Male Oenocytes	528.66	N-acetylglucosaminylphosphatidylinositol deacetylase	FALSE	FALSE	FALSE
Anogam_AGAP001956	-6.28512694627438	1.55167191795218	-4.05055145585749	5.10970715464724e-05	0.00182443438616457	Female vs Male Oenocytes	Female Oenocytes	0.796781	Male Oenocytes	62.46	Niemann-Pick Type C-2	FALSE	FALSE	FALSE
Anogam_AGAP001957	-0.210772628992245	0.217239859887285	-0.970229998774646	0.331931860806243	0.707916616564885	Female vs Male Oenocytes	Female Oenocytes	1231.96	Male Oenocytes	1468.76	phosphatidylinositol transfer protein2C beta	FALSE	FALSE	FALSE
Anogam_AGAP001958	-0.284034387949254	0.437475820686546	-0.649257340676585	0.516172054240991	0.837233896202021	Female vs Male Oenocytes	Female Oenocytes	815.226	Male Oenocytes	1031.6	CRY1 cryptochrome 1	FALSE	FALSE	FALSE
Anogam_AGAP001959	-0.889508417747144	0.278302018439917	-3.19619822642135	0.00139251407415631	0.0252588649173166	Female vs Male Oenocytes	Female Oenocytes	304.643	Male Oenocytes	581.036	secernin	FALSE	FALSE	FALSE
Anogam_AGAP001960	-2.37689501231319	1.20567964749094	-1.97141505810401	0.0486764200694211	0.259335733312267	Female vs Male Oenocytes	Female Oenocytes	4.15442	Male Oenocytes	22.238		FALSE	FALSE	FALSE
Anogam_AGAP001961	-3.75990157459104	1.52635931672175	-2.46331354183785	0.0137659475349143	0.119117586832728	Female vs Male Oenocytes	Female Oenocytes	1.809	Male Oenocytes	25.9646	GPRVPR2 GPCR vasopressin family receptor 2	FALSE	FALSE	FALSE
Anogam_AGAP001962	1.33011100886091	0.849917725780708	1.56498796120425	0.117585732140317	0.4294875844436	Female vs Male Oenocytes	Female Oenocytes	141.731	Male Oenocytes	57.0355	GPRVPR1 GPCR vasopressin family receptor 1	FALSE	FALSE	FALSE
Anogam_AGAP001964	1.14595671498047	0.472147946424679	2.42711362753599	0.015219488306558	0.127783426573873	Female vs Male Oenocytes	Female Oenocytes	631.028	Male Oenocytes	288.888	CLIPA26 CLIP-domain serine protease	FALSE	FALSE	FALSE
Anogam_AGAP001965	NA	NA	NA	NA	NA	Female vs Male Oenocytes	Female Oenocytes	0	Male Oenocytes	0	sodium-coupled monocarboxylate transporter 1	FALSE	FALSE	FALSE
Anogam_AGAP001966	-2.62457588987512	1.72902306159121	-1.51795308470886	0.129026226148252	0.450882856210376	Female vs Male Oenocytes	Female Oenocytes	3.0221	Male Oenocytes	18.478	sodium-coupled monocarboxylate transporter 1	FALSE	FALSE	FALSE
Anogam_AGAP001967	0.641781596757236	0.695737361942806	0.922448084382157	0.356294898242607	0.7290683459716	Female vs Male Oenocytes	Female Oenocytes	106.668	Male Oenocytes	70.8179	xeroderma pigmentosum group C-complementing protein	FALSE	FALSE	FALSE
Anogam_AGAP001968	0.754432564676376	0.53317763469746	1.41497413916182	0.157076078543712	0.501957087010341	Female vs Male Oenocytes	Female Oenocytes	91.8898	Male Oenocytes	56.1295		FALSE	FALSE	FALSE
Anogam_AGAP001969	-3.16925442922372	3.01682867993204	-1.0505251591864	0.293476729884389	NA	Female vs Male Oenocytes	Female Oenocytes	0.361513	Male Oenocytes	3.73275	polyubiquitin	FALSE	FALSE	FALSE
Anogam_AGAP001970	-2.21707221782497	4.03118083432039	-0.549980839100397	0.582332515871493	NA	Female vs Male Oenocytes	Female Oenocytes	0	Male Oenocytes	1.10825	Polyubiquitin-B	FALSE	FALSE	FALSE
Anogam_AGAP001971	-0.685830001623551	0.249333076362991	-2.75065792163526	0.00594757158610353	0.0685418895358885	Female vs Male Oenocytes	Female Oenocytes	52316	Male Oenocytes	86988.6	Polyubiquitin-C	FALSE	FALSE	FALSE
Anogam_AGAP001972	0.612792815659695	0.386087549663169	1.58718616074077	0.112470488207605	0.417853117196271	Female vs Male Oenocytes	Female Oenocytes	109.315	Male Oenocytes	72.9792	pre-rRNA-processing protein TSR4	FALSE	FALSE	FALSE
Anogam_AGAP001973	-0.197297578874551	0.548775506074746	-0.359523296303386	0.719203653276977	0.923767040515074	Female vs Male Oenocytes	Female Oenocytes	2073.86	Male Oenocytes	2484.8	Prosalpha7 26S proteasome alpha 7 subunit	FALSE	FALSE	FALSE
Anogam_AGAP001974	-1.04538177272507	0.751995944195043	-1.39014283360807	0.164485508578735	0.515492619432464	Female vs Male Oenocytes	Female Oenocytes	31.8839	Male Oenocytes	68.532	organic solute transporter subunit alpha	FALSE	FALSE	FALSE
Anogam_AGAP001975	-0.0909217610455437	0.348948738368932	-0.260559076586817	0.794432551877599	0.951036242541686	Female vs Male Oenocytes	Female Oenocytes	283.676	Male Oenocytes	313.145	Protein SYS1 homolog	FALSE	FALSE	FALSE
Anogam_AGAP001976	0.454746421026148	0.311391274642759	1.46036982426001	0.144188461429167	0.477921387417355	Female vs Male Oenocytes	Female Oenocytes	325.503	Male Oenocytes	242.922	Archease	FALSE	FALSE	FALSE
Anogam_AGAP001978	0.707564328653296	0.314429611205661	2.25031073231361	0.0244292271332726	0.173597636388395	Female vs Male Oenocytes	Female Oenocytes	412.616	Male Oenocytes	258.19		FALSE	FALSE	FALSE
Anogam_AGAP001979	2.01337927766087	0.634967278133646	3.17083942274754	0.00151999140736837	0.0270409660163996	Female vs Male Oenocytes	Female Oenocytes	200.776	Male Oenocytes	52.0017	SCRASP3 Class A Scavenger Receptor (SRCR domain) with Serine Protease domain.	FALSE	FALSE	FALSE
Anogam_AGAP001980	-0.599976952679263	0.873844055165598	-0.686594992702175	0.492337984773878	0.826276582093854	Female vs Male Oenocytes	Female Oenocytes	115.917	Male Oenocytes	182.011		FALSE	FALSE	FALSE
Anogam_AGAP001981	1.26678291565092	0.980323284036644	1.29220935203613	0.19628465386638	0.563121690934391	Female vs Male Oenocytes	Female Oenocytes	219.549	Male Oenocytes	95.1621		FALSE	FALSE	FALSE
Anogam_AGAP001982	2.89192957561347	3.96024676225079	0.730239742427024	0.465243653711811	NA	Female vs Male Oenocytes	Female Oenocytes	2.03618	Male Oenocytes	0		FALSE	FALSE	FALSE
Anogam_AGAP001983	1.11845492420252	3.88377074321199	0.287981705963809	0.773360742266523	NA	Female vs Male Oenocytes	Female Oenocytes	2.32941	Male Oenocytes	1.09479		FALSE	FALSE	FALSE
Anogam_AGAP001984	NA	NA	NA	NA	NA	Female vs Male Oenocytes	Female Oenocytes	0	Male Oenocytes	0		FALSE	FALSE	FALSE
Anogam_AGAP001985	0.895542965956273	1.74099734164222	0.514385027786165	0.606982824966635	0.87758240672176	Female vs Male Oenocytes	Female Oenocytes	20.6983	Male Oenocytes	11.005	soluble guanylate cyclase 88E	FALSE	FALSE	FALSE
Anogam_AGAP001986	-0.332256804000906	0.344068306654401	-0.965671053029133	0.334208808654417	0.710061923562807	Female vs Male Oenocytes	Female Oenocytes	478.547	Male Oenocytes	619.388	nuclear protein localization protein 4 homolog	FALSE	FALSE	FALSE
Anogam_AGAP001987	-0.464159506356476	0.947420141926515	-0.489919398813539	0.624190935354722	0.88672704659787	Female vs Male Oenocytes	Female Oenocytes	29.4569	Male Oenocytes	42.7207		FALSE	FALSE	FALSE
Anogam_AGAP001988	4.60904639833129	2.60536451003107	1.76906009910925	0.0768838456951915	NA	Female vs Male Oenocytes	Female Oenocytes	11.4735	Male Oenocytes	0.363195	Hyp37.7-like	FALSE	FALSE	FALSE
Anogam_AGAP001989	0.123654878399004	1.04423977792048	0.118416173194678	0.905737911583171	0.979640302378329	Female vs Male Oenocytes	Female Oenocytes	76.3799	Male Oenocytes	73.1623		FALSE	FALSE	FALSE
Anogam_AGAP001990	-0.303491898432008	1.3446576799125	-0.225701978254985	0.821433219361822	0.957057454177612	Female vs Male Oenocytes	Female Oenocytes	11.3607	Male Oenocytes	14.3962	histamine-gated chloride channel subunit	FALSE	FALSE	FALSE
Anogam_AGAP001991	-0.582687162658533	0.976195828341762	-0.596895772079183	0.550576970219553	0.849559439964252	Female vs Male Oenocytes	Female Oenocytes	10.2891	Male Oenocytes	15.9165		FALSE	FALSE	FALSE
Anogam_AGAP001993	1.50076744541734	0.770154622284535	1.94865732411703	0.0513363614275504	0.268723669694832	Female vs Male Oenocytes	Female Oenocytes	64.5341	Male Oenocytes	23.6163	RNA-binding protein Musashi	FALSE	FALSE	FALSE
Anogam_AGAP001994	-0.0327180010769164	0.337933462814915	-0.096817878893621	0.922871025333144	0.984174047307023	Female vs Male Oenocytes	Female Oenocytes	308.605	Male Oenocytes	323.471	SWI-SNF-related matrix-associated actin-dependent regulator of chromatin subfamily	FALSE	FALSE	FALSE
Anogam_AGAP001995	-0.223833038509324	0.499843227754077	-0.447806484275205	0.65429286329199	0.90034944920342	Female vs Male Oenocytes	Female Oenocytes	3689.3	Male Oenocytes	4496.39	Prosalpha2 26S proteasome alpha 2 subunit	FALSE	FALSE	FALSE
Anogam_AGAP001996	0.541443650246111	1.33346167265689	0.406043654158652	0.684710525303567	0.909828118944494	Female vs Male Oenocytes	Female Oenocytes	18.5545	Male Oenocytes	12.745	beta-sarcoglycan	FALSE	FALSE	FALSE
Anogam_AGAP001997	0.116063777278023	0.331177730964888	0.350457674010479	0.725995249660316	0.927640339093844	Female vs Male Oenocytes	Female Oenocytes	379.811	Male Oenocytes	361.399	interleukin enhancer-binding factor	FALSE	FALSE	FALSE
Anogam_AGAP001998	0.657145820219659	0.351151012224389	1.87140517140169	0.0612889426617274	0.297413581557338	Female vs Male Oenocytes	Female Oenocytes	473.131	Male Oenocytes	310.12	mRpS10 28S ribosomal protein S102C mitochondrial	FALSE	FALSE	FALSE
Anogam_AGAP001999	2.40326825208079	0.71742831264261	3.34983748164117	0.000808589873891938	0.0170709762587642	Female vs Male Oenocytes	Female Oenocytes	128.868	Male Oenocytes	25.0506	protein neuralized	FALSE	FALSE	FALSE
Anogam_AGAP002000	-0.794814863626203	1.53955299159232	-0.516263401108491	0.605670454308299	0.876928255784726	Female vs Male Oenocytes	Female Oenocytes	6.06516	Male Oenocytes	10.738	Kv channel-interacting protein	FALSE	FALSE	FALSE
Anogam_AGAP002002	-0.445148655678738	0.424025485676208	-1.0498158028611	0.29380280820659	0.674275456993744	Female vs Male Oenocytes	Female Oenocytes	234.651	Male Oenocytes	331.325		FALSE	FALSE	FALSE
Anogam_AGAP002003	-0.186540518867597	0.381237719661995	-0.489302367648678	0.624627645092914	0.886869540745131	Female vs Male Oenocytes	Female Oenocytes	139.11	Male Oenocytes	161.769		FALSE	FALSE	FALSE
Anogam_AGAP002004	0.336630415393746	0.826805088294245	0.407146037391035	0.683900732342943	0.909828118944494	Female vs Male Oenocytes	Female Oenocytes	140.213	Male Oenocytes	115.451	nuclear RNA export factor 1-2	FALSE	FALSE	FALSE
Anogam_AGAP002005	3.42073541777185	3.94391013212224	0.867346187711212	0.385752356862354	NA	Female vs Male Oenocytes	Female Oenocytes	2.48239	Male Oenocytes	0		FALSE	FALSE	FALSE
Anogam_AGAP002006	1.80564310415295	2.25691138417887	0.800050510095636	0.423681533061993	NA	Female vs Male Oenocytes	Female Oenocytes	5.10564	Male Oenocytes	1.50545	reticulon-nogo receptor	FALSE	FALSE	FALSE
Anogam_AGAP002007	-1.34158928470817	1.44137211321213	-0.930772333119732	0.351971344067597	0.725473039747188	Female vs Male Oenocytes	Female Oenocytes	24.996	Male Oenocytes	63.8124	reticulon-nogo receptor	FALSE	FALSE	FALSE
Anogam_AGAP002008	0.197486392099596	0.314313351149813	0.628310542257132	0.529800526842557	0.843569106736013	Female vs Male Oenocytes	Female Oenocytes	1219.35	Male Oenocytes	1095.16		FALSE	FALSE	FALSE
Anogam_AGAP002009	-8.13657064706	1.7451932288491	-4.66227493469351	3.1273301366599e-06	0.00019889819669157	Female vs Male Oenocytes	Female Oenocytes	0	Male Oenocytes	57.059	dynein heavy chain2C axonemal	FALSE	FALSE	FALSE
Anogam_AGAP002010	-4.74716362685869	1.61520671347026	-2.93904401663825	NA	NA	Female vs Male Oenocytes	Female Oenocytes	10.2789	Male Oenocytes	271.07		FALSE	FALSE	FALSE
Anogam_AGAP002011	0.267285041870148	2.18628337467927	0.122255442714218	0.90269671877989	NA	Female vs Male Oenocytes	Female Oenocytes	4.55405	Male Oenocytes	3.71069	ammonium transporter Rh	FALSE	FALSE	FALSE
Anogam_AGAP002012	0.43484440980131	0.608991203648203	0.714040543108579	0.475202109703341	0.815464357527304	Female vs Male Oenocytes	Female Oenocytes	82.9857	Male Oenocytes	62.0692		FALSE	FALSE	FALSE
Anogam_AGAP002013	0.324835012620014	1.38942106022695	0.233791628699621	0.815146748830206	0.956474127363858	Female vs Male Oenocytes	Female Oenocytes	8.454	Male Oenocytes	7.09734	leucine-rich repeat-containing protein 49	FALSE	FALSE	FALSE
Anogam_AGAP002014	1.01907791524253	0.306700174664472	3.32271710101695	0.000891452719801762	0.0182891590256103	Female vs Male Oenocytes	Female Oenocytes	211.419	Male Oenocytes	107.728	leucyl-tRNA synthetase	FALSE	FALSE	FALSE
Anogam_AGAP002015	-0.332893315624362	0.253349808291397	-1.31396711080782	0.188857272431756	0.553676636204422	Female vs Male Oenocytes	Female Oenocytes	2009.4	Male Oenocytes	2603.86	dynein heavy chain 12C cytosolic	FALSE	FALSE	FALSE
Anogam_AGAP002016	0.750916031670568	0.299735866852836	2.50525917887315	0.0122361692998401	0.111075163956443	Female vs Male Oenocytes	Female Oenocytes	3118.88	Male Oenocytes	1896.71	iron-zinc purple acid phosphatase-like protein precursor	FALSE	FALSE	FALSE
Anogam_AGAP002017	0.529893384351338	0.728477281359794	0.727398640850166	0.46698178686844	0.808714544447456	Female vs Male Oenocytes	Female Oenocytes	32.9002	Male Oenocytes	23.0004	Hexosyltransferase	FALSE	FALSE	FALSE
Anogam_AGAP002018	1.42840012526522	0.48740974110868	2.93059412808642	0.00338314481426053	0.048625539025304	Female vs Male Oenocytes	Female Oenocytes	128.189	Male Oenocytes	49.2801	histone-lysine N-methyltransferase setd3	FALSE	FALSE	FALSE
Anogam_AGAP002019	-0.0255010681191664	0.233263670294669	-0.109322930943135	0.912946359335833	0.981496315869193	Female vs Male Oenocytes	Female Oenocytes	430.516	Male Oenocytes	451.506	COMPASS component SWD3	FALSE	FALSE	FALSE
Anogam_AGAP002020	-0.267788547114692	0.305970571899053	-0.875210140153745	0.381459576858785	0.748414423722562	Female vs Male Oenocytes	Female Oenocytes	2501.72	Male Oenocytes	3122.11	NADH dehydrogenase (ubiquinone) 1 beta subcomplex 8	FALSE	FALSE	FALSE
Anogam_AGAP002021	-0.248641940384359	0.659324317152943	-0.377116289989168	0.706087185771308	0.919650117407485	Female vs Male Oenocytes	Female Oenocytes	80.2291	Male Oenocytes	99.9186	lysophosphatidate acyltransferase	FALSE	FALSE	FALSE
Anogam_AGAP002022	0.209016048386649	0.274434292834293	0.761625109704695	0.44628378404185	0.79663774128641	Female vs Male Oenocytes	Female Oenocytes	357.758	Male Oenocytes	317.508	Protein maelstrom	FALSE	FALSE	FALSE
Anogam_AGAP002023	1.29635960880877	0.483390510490388	2.68180607743757	0.00732258938118612	0.0792004669042209	Female vs Male Oenocytes	Female Oenocytes	228.146	Male Oenocytes	94.7646		FALSE	FALSE	FALSE
Anogam_AGAP002024	-0.447025127055722	0.355546002810603	-1.2572919496267	0.208647938010389	0.581039819759783	Female vs Male Oenocytes	Female Oenocytes	1259.77	Male Oenocytes	1774.06		FALSE	FALSE	FALSE
Anogam_AGAP002025	-0.278267271897265	0.473410337366116	-0.587792977748317	0.556671258058897	0.851389294582764	Female vs Male Oenocytes	Female Oenocytes	83.6569	Male Oenocytes	104.774	OBP11 odorant-binding protein 11	FALSE	FALSE	FALSE
Anogam_AGAP002026	-0.268887637361037	0.359909261392356	-0.747098411196229	0.455004159186906	0.8027059907689	Female vs Male Oenocytes	Female Oenocytes	235.702	Male Oenocytes	292.709	Ditrans2Cpolycis-polyprenyl diphosphate synthase ((2E2C6E)-farnesyl diphosphate specific)	FALSE	FALSE	FALSE
Anogam_AGAP002028	-0.0152630420289261	0.333426538424685	-0.0457763263267471	0.963488527880276	0.992834668896308	Female vs Male Oenocytes	Female Oenocytes	893.833	Male Oenocytes	921.303	E3 ubiquitin-protein ligase RNF13	FALSE	FALSE	FALSE
Anogam_AGAP002030	-0.600314704427776	0.281428658623671	-2.13309727361676	0.0329167473987131	0.206510987379349	Female vs Male Oenocytes	Female Oenocytes	444.303	Male Oenocytes	689.537	bromodomain and WD repeat domain containing protein 1-3	FALSE	FALSE	FALSE
Anogam_AGAP002032	1.52204600962772	0.68897767085616	2.2091369198313	0.027165118832482	0.184649197638856	Female vs Male Oenocytes	Female Oenocytes	1622.55	Male Oenocytes	565.036		FALSE	FALSE	FALSE
Anogam_AGAP002033	-7.60114570543841	1.08509368896543	-7.00505936283313	2.46881134935762e-12	1.25613121455316e-09	Female vs Male Oenocytes	Female Oenocytes	5.40788	Male Oenocytes	1088.99	arginine kinase	FALSE	TRUE	TRUE
Anogam_AGAP002035	-0.160306429702664	0.325517118133952	-0.492466972617697	0.622389264429246	0.885566166947075	Female vs Male Oenocytes	Female Oenocytes	288.42	Male Oenocytes	331.155	GC-rich sequence DNA-binding factor	FALSE	FALSE	FALSE
Anogam_AGAP002036	0.0470587965651049	0.536339342516078	0.0877407134526856	0.930082759731959	0.986073654169592	Female vs Male Oenocytes	Female Oenocytes	1069.62	Male Oenocytes	1046.21	zinc finger2C FYVE domain containing 1	FALSE	FALSE	FALSE
Anogam_AGAP002037	1.40815746147495	0.624597691575026	2.25450314733641	0.0241645328945218	0.172439191258523	Female vs Male Oenocytes	Female Oenocytes	89.0468	Male Oenocytes	34.5638	Dihydroorotate dehydrogenase (quinone)2C mitochondrial	FALSE	FALSE	FALSE
Anogam_AGAP002038	0.327049561485271	0.50280633637737	0.650448369130757	0.515402642148667	0.83720510289557	Female vs Male Oenocytes	Female Oenocytes	137.215	Male Oenocytes	112.745		FALSE	FALSE	FALSE
Anogam_AGAP002039	-0.488568204850913	0.932486316707073	-0.523941419940845	0.600319284749675	0.875128016277392	Female vs Male Oenocytes	Female Oenocytes	264.164	Male Oenocytes	369.694		FALSE	FALSE	FALSE
Anogam_AGAP002040	-1.02991952860148	1.13752181081488	-0.905406400835238	0.365250125990553	0.737117037813666	Female vs Male Oenocytes	Female Oenocytes	10.2811	Male Oenocytes	22.0533	Brother of iHog	FALSE	FALSE	FALSE
Anogam_AGAP002041	1.00057772691895	0.530095961157543	1.88754074778091	0.0590876310646583	0.291881424132992	Female vs Male Oenocytes	Female Oenocytes	63.9858	Male Oenocytes	32.5935		FALSE	FALSE	FALSE
Anogam_AGAP002043	-0.49618718194613	1.877598386729	-0.264266940924755	0.791574232330805	NA	Female vs Male Oenocytes	Female Oenocytes	4.89637	Male Oenocytes	6.91399		FALSE	FALSE	FALSE
Anogam_AGAP002044	NA	NA	NA	NA	NA	Female vs Male Oenocytes	Female Oenocytes	0	Male Oenocytes	0	Or77 odorant receptor 77	FALSE	FALSE	FALSE
Anogam_AGAP002045	-1.23396113827818	4.0804728567969	-0.302406407684529	0.762342270655386	NA	Female vs Male Oenocytes	Female Oenocytes	0	Male Oenocytes	0.360706	Or75 odorant receptor 75	FALSE	FALSE	FALSE
Anogam_AGAP002046	2.42295887503323	3.94436154270853	0.614284174713209	0.539027558177707	NA	Female vs Male Oenocytes	Female Oenocytes	2.43542	Male Oenocytes	0.50834	Or76 odorant receptor 76	FALSE	FALSE	FALSE
Anogam_AGAP002047	0.0235987883797301	0.333695942847987	0.070719434519707	0.943621053052611	0.988383957219693	Female vs Male Oenocytes	Female Oenocytes	432.189	Male Oenocytes	439.736	atlastin	FALSE	FALSE	FALSE
Anogam_AGAP002048	0.254811242564531	0.387335932789136	0.657855935878919	0.510630707395097	0.834995673863491	Female vs Male Oenocytes	Female Oenocytes	198.91	Male Oenocytes	171.38		FALSE	FALSE	FALSE
Anogam_AGAP002049	1.67206450130444	1.01414004783336	1.64875108213771	0.0991986403590831	0.392843636962623	Female vs Male Oenocytes	Female Oenocytes	96.0428	Male Oenocytes	31.8999	phosphatidylethanolamine binding protein 1	FALSE	FALSE	FALSE
Anogam_AGAP002050	0.819979682702691	1.31304303110727	0.62448805048774	0.532307115539328	0.843896601542978	Female vs Male Oenocytes	Female Oenocytes	19.3313	Male Oenocytes	11.4132	ABCG13 ATP-binding cassette transporter (ABC transporter) family G member 13	FALSE	FALSE	FALSE
Anogam_AGAP002051	1.14409221276827	0.571223790865381	2.00287913610009	0.045190263034976	0.248640355886387	Female vs Male Oenocytes	Female Oenocytes	83.6983	Male Oenocytes	39.2919	ABCG14 ATP-binding cassette transporter (ABC transporter) family G member 14	FALSE	FALSE	FALSE
Anogam_AGAP002052	0.369205345413217	0.78828564560755	0.468364922627333	0.639523648117744	0.89402455773761	Female vs Male Oenocytes	Female Oenocytes	52.6098	Male Oenocytes	41.6286		FALSE	FALSE	FALSE
Anogam_AGAP002053	-0.966960251141992	1.41644209064036	-0.682668396774934	0.494816403884666	0.827600981970526	Female vs Male Oenocytes	Female Oenocytes	5.92461	Male Oenocytes	11.867		FALSE	FALSE	FALSE
Anogam_AGAP002054	-0.227434699399312	0.359677816712719	-0.632328958949859	0.52717194437447	0.842680129744677	Female vs Male Oenocytes	Female Oenocytes	2440.61	Male Oenocytes	2926.54	fermitin family homolog 2	FALSE	FALSE	FALSE
Anogam_AGAP002055	0.20257043204629	0.779847084071337	0.259756606370487	0.795051525285387	0.951036242541686	Female vs Male Oenocytes	Female Oenocytes	387.444	Male Oenocytes	354.499	Beta-galactosidase	FALSE	FALSE	FALSE
Anogam_AGAP002056	0.575671564495089	0.656638586355104	0.876694693941991	0.380652489564071	0.748414423722562	Female vs Male Oenocytes	Female Oenocytes	5026.4	Male Oenocytes	3546.05	Beta-galactosidase	FALSE	FALSE	FALSE
Anogam_AGAP002058	-0.0354072116824751	0.641809054323384	-0.0551678282566496	0.956004759219335	0.99137241641324	Female vs Male Oenocytes	Female Oenocytes	980.073	Male Oenocytes	1052.57	beta-galactosidase	FALSE	FALSE	FALSE
Anogam_AGAP002059	-0.325798390491506	0.37642751074318	-0.865501009339841	0.386763862182241	0.753822842667397	Female vs Male Oenocytes	Female Oenocytes	399.061	Male Oenocytes	518.889		FALSE	FALSE	FALSE
Anogam_AGAP002060	-3.34459266701534	1.94627544573522	-1.71845802933197	0.0857131036029302	NA	Female vs Male Oenocytes	Female Oenocytes	1.13037	Male Oenocytes	11.2809	ABCH3 ATP-binding cassette transporter (ABC transporter) family H member 3	FALSE	FALSE	FALSE
Anogam_AGAP002061	-0.0288896111901354	0.447359117008507	-0.0645781210033684	0.948509905250199	0.989749466348034	Female vs Male Oenocytes	Female Oenocytes	1764.51	Male Oenocytes	1870.49	26S proteasome regulatory subunit N7	FALSE	FALSE	FALSE
Anogam_AGAP002062	-0.583352551134482	0.289974657081771	-2.01173632552992	0.0442477392459881	0.245509811650586	Female vs Male Oenocytes	Female Oenocytes	336.941	Male Oenocytes	518.72	Protein FAM50 homolog	FALSE	FALSE	FALSE
Anogam_AGAP002063	0.351579547529131	0.284771578799663	1.23460195364674	0.216978681566874	0.592585900060254	Female vs Male Oenocytes	Female Oenocytes	1924.63	Male Oenocytes	1545.18	nucleolar protein 56	FALSE	FALSE	FALSE
Anogam_AGAP002064	-0.855625447657539	0.612144719173109	-1.39775027188559	0.162188072127479	0.511743795746796	Female vs Male Oenocytes	Female Oenocytes	974.856	Male Oenocytes	1777.61		FALSE	FALSE	FALSE
Anogam_AGAP002065	-1.24568911300789	0.449536804380052	-2.77105033641415	0.00558757882868095	0.0662019831022731	Female vs Male Oenocytes	Female Oenocytes	1508.5	Male Oenocytes	3641.89	alpha-tocopherol transfer protein	FALSE	FALSE	FALSE
Anogam_AGAP002066	-0.420233377882133	0.407373801810586	-1.03156701784551	0.30227499788559	0.682785877576863	Female vs Male Oenocytes	Female Oenocytes	151.987	Male Oenocytes	209.922	Mps one binder kinase activator-like 1B	FALSE	FALSE	FALSE
Anogam_AGAP002067	-0.0119433625188099	0.270712350822182	-0.044118277140059	0.964810123917913	0.993011815615321	Female vs Male Oenocytes	Female Oenocytes	463.286	Male Oenocytes	481.367	cell cycle progression	FALSE	FALSE	FALSE
Anogam_AGAP002068	-2.16409329607346	0.740938478118933	-2.92074626974101	0.00349194090697573	0.0493527648185903	Female vs Male Oenocytes	Female Oenocytes	17.5563	Male Oenocytes	81.7683		FALSE	FALSE	FALSE
Anogam_AGAP002069	2.89192957561347	3.96024676225079	0.730239742427024	0.465243653711811	NA	Female vs Male Oenocytes	Female Oenocytes	1.95436	Male Oenocytes	0	decaprenyl-diphosphate synthase subunit 1	FALSE	FALSE	FALSE
Anogam_AGAP002070	0.689592213364309	4.0804728567969	0.168998113102418	0.865798125578915	NA	Female vs Male Oenocytes	Female Oenocytes	0.347464	Male Oenocytes	0		FALSE	FALSE	FALSE
Anogam_AGAP002071	-0.176234001805591	0.547126534275044	-0.32210830724762	0.747370645132934	0.934402842983077	Female vs Male Oenocytes	Female Oenocytes	1649.05	Male Oenocytes	1877.98	ABCD1 ATP-binding cassette transporter (ABC transporter) family D member 1	FALSE	FALSE	FALSE
Anogam_AGAP002072	2.18483071779723	3.95151098268396	0.552910197484317	0.580324904312972	NA	Female vs Male Oenocytes	Female Oenocytes	2.36354	Male Oenocytes	0.522328		FALSE	FALSE	FALSE
Anogam_AGAP002073	0.220059704555328	0.286871010010656	0.767103321270261	0.443020087401967	0.795012544607596	Female vs Male Oenocytes	Female Oenocytes	321.981	Male Oenocytes	284.332	E3 ubiquitin-protein ligase RNF1-2	FALSE	FALSE	FALSE
Anogam_AGAP002074	0.27411534305715	0.604549686215228	0.453420701900028	0.650245832245158	0.898526520688746	Female vs Male Oenocytes	Female Oenocytes	77.9587	Male Oenocytes	67.1052		FALSE	FALSE	FALSE
Anogam_AGAP002075	0.158940168736762	0.520439401337854	0.305396110148821	0.760064484028177	0.938065312719263	Female vs Male Oenocytes	Female Oenocytes	88.9258	Male Oenocytes	82.0403	serine-threonine-protein kinase TTK-MPS1	FALSE	FALSE	FALSE
Anogam_AGAP002076	0.146812255461795	0.292449275558439	0.50200929778832	0.615660980693218	0.882346895436613	Female vs Male Oenocytes	Female Oenocytes	51115.7	Male Oenocytes	47348.4	heat shock 70kDa protein 1-8	FALSE	FALSE	FALSE
Anogam_AGAP002077	-0.243200996963627	0.355159433138428	-0.684765697519391	0.493491784438641	0.826901432314772	Female vs Male Oenocytes	Female Oenocytes	181.79	Male Oenocytes	222.6	tRNA pseudouridine synthase 2	FALSE	FALSE	FALSE
Anogam_AGAP002078	0.711261975803641	0.472879489488763	1.50410832276231	0.132553477677764	0.456777578343693	Female vs Male Oenocytes	Female Oenocytes	190.235	Male Oenocytes	120.28	14 kDa phosphohistidine phosphatase	FALSE	FALSE	FALSE
Anogam_AGAP002079	-3.68144276423888	1.48714211314302	-2.47551510491373	0.0133044133778332	0.117014442984296	Female vs Male Oenocytes	Female Oenocytes	6.26789	Male Oenocytes	80.0298		FALSE	FALSE	FALSE
Anogam_AGAP002080	-4.84487008922071	3.38574279920637	-1.43096223681148	0.152441038311913	NA	Female vs Male Oenocytes	Female Oenocytes	0	Male Oenocytes	6.15902		FALSE	FALSE	FALSE
Anogam_AGAP002081	0.010455861500486	0.373275773927555	0.0280110905416413	0.977653305645445	0.995068998825109	Female vs Male Oenocytes	Female Oenocytes	395.355	Male Oenocytes	400.411		FALSE	FALSE	FALSE
Anogam_AGAP002082	0.497018262159018	0.619547173751459	0.802228277710464	0.422420921796621	0.78173495073192	Female vs Male Oenocytes	Female Oenocytes	56.0037	Male Oenocytes	40.2743		FALSE	FALSE	FALSE
Anogam_AGAP002083	0.575909135521113	0.7236368015577	0.795853851381537	0.426116987103449	0.783267062999404	Female vs Male Oenocytes	Female Oenocytes	27.8455	Male Oenocytes	18.9227		FALSE	FALSE	FALSE
Anogam_AGAP002084	-0.72450777194799	0.448897336815458	-1.6139720878893	0.106533480738735	0.405720321855302	Female vs Male Oenocytes	Female Oenocytes	1909.89	Male Oenocytes	3272.99	glycerol-3-phosphate O-acyltransferase 3-4	FALSE	FALSE	FALSE
Anogam_AGAP002085	0.193041087315992	0.619079265656853	0.311819661915461	0.755177580500028	0.936882568620485	Female vs Male Oenocytes	Female Oenocytes	124.673	Male Oenocytes	111.901		FALSE	FALSE	FALSE
Anogam_AGAP002086	-0.0394319229162711	0.25543405229019	-0.154372224700385	0.87731625259906	0.970303623709557	Female vs Male Oenocytes	Female Oenocytes	309.704	Male Oenocytes	327.25	OTU domain-containing protein 5	FALSE	FALSE	FALSE
Anogam_AGAP002087	0.0908925553703363	0.360092508632371	0.252414457927896	0.800720726064763	0.952642291231842	Female vs Male Oenocytes	Female Oenocytes	318.429	Male Oenocytes	309.426	Protein kish	FALSE	FALSE	FALSE
Anogam_AGAP002088	0.90967101142854	0.380435249109033	2.39113229796387	0.0167964991937242	0.135853274038944	Female vs Male Oenocytes	Female Oenocytes	332.503	Male Oenocytes	181.884	U3 small nucleolar RNA-associated protein 15	FALSE	FALSE	FALSE
Anogam_AGAP002089	-0.0413665644412196	1.27907240049493	-0.0323410656231914	0.974200060688606	0.994104549650099	Female vs Male Oenocytes	Female Oenocytes	39.8436	Male Oenocytes	41.1986		FALSE	FALSE	FALSE
Anogam_AGAP002090	0.324653651135062	0.868834752882858	0.373665590675139	0.708653128514525	0.920813055336785	Female vs Male Oenocytes	Female Oenocytes	27.2145	Male Oenocytes	22.3906	COE16738 carboxylesterase	FALSE	FALSE	FALSE
Anogam_AGAP002091	0.732941879617064	0.453355299644789	1.61670522036763	0.105941926531531	0.404225010059091	Female vs Male Oenocytes	Female Oenocytes	385.649	Male Oenocytes	238.18	phosphoribosylformylglycinamidine synthase	FALSE	FALSE	FALSE
Anogam_AGAP002092	-0.730466770068403	0.282511698185088	-2.5856160108097	0.00972051549270203	0.0962217564725057	Female vs Male Oenocytes	Female Oenocytes	202.842	Male Oenocytes	347.125	Ras-related protein Rab-30	FALSE	FALSE	FALSE
Anogam_AGAP002093	-0.675146336773343	0.610093200896172	-1.10662819349833	0.268454712593909	0.648028247467477	Female vs Male Oenocytes	Female Oenocytes	50.913	Male Oenocytes	83.7133		FALSE	FALSE	FALSE
Anogam_AGAP002094	0.593553762844007	0.495411989315619	1.19810132908565	0.230877571504613	0.606383156191423	Female vs Male Oenocytes	Female Oenocytes	378.117	Male Oenocytes	254.344	ancient conserved domain-containing protein 2	FALSE	FALSE	FALSE
Anogam_AGAP002095	-0.0962572483984423	0.390332414943773	-0.246603266122052	0.805215276604116	0.95371184611553	Female vs Male Oenocytes	Female Oenocytes	356.97	Male Oenocytes	394.255	USP ultraspiracle	FALSE	FALSE	FALSE
Anogam_AGAP002097	0.223638858040809	0.348061152992459	0.642527487247776	0.520530747960834	0.839664299566614	Female vs Male Oenocytes	Female Oenocytes	177.968	Male Oenocytes	157.341	beta-12C3-galactosyltransferase brn	FALSE	FALSE	FALSE
Anogam_AGAP002098	1.45124156904343	0.821588467553433	1.76638502894887	0.0773312750399271	0.341791969016261	Female vs Male Oenocytes	Female Oenocytes	49.063	Male Oenocytes	18.4646	Sjogrens syndrome nuclear autoantigen 1	FALSE	FALSE	FALSE
Anogam_AGAP002099	0.0698411858600501	0.289724124839537	0.241060995175088	0.809507842755554	0.954752422622317	Female vs Male Oenocytes	Female Oenocytes	364.273	Male Oenocytes	356.358		FALSE	FALSE	FALSE
Anogam_AGAP002100	-1.32790864126502	0.793556991150453	-1.67336266465235	0.0942559230590738	0.380765491484373	Female vs Male Oenocytes	Female Oenocytes	47.8044	Male Oenocytes	125.598		FALSE	FALSE	FALSE
Anogam_AGAP002101	0.250697638812066	0.341639528195152	0.733807472854436	0.463066085447457	0.806325425505616	Female vs Male Oenocytes	Female Oenocytes	1478.64	Male Oenocytes	1271.93	isoleucyl-tRNA synthetase	FALSE	FALSE	FALSE
Anogam_AGAP002102	-0.120681533682459	1.07278942552309	-0.11249321703895	0.910432347625637	0.980898180159517	Female vs Male Oenocytes	Female Oenocytes	14.8168	Male Oenocytes	16.7656		FALSE	FALSE	FALSE
Anogam_AGAP002104	0.711846691117033	1.22785757614884	0.579746955139319	0.562085273622057	0.854974550729156	Female vs Male Oenocytes	Female Oenocytes	21.2289	Male Oenocytes	13.0252		FALSE	FALSE	FALSE
Anogam_AGAP002105	-8.74627835731711	1.56778613712818	-5.57874454314174	2.42260714322539e-08	3.12056332777994e-06	Female vs Male Oenocytes	Female Oenocytes	0	Male Oenocytes	94.227	ATP synthase lipid-binding protein2C mitochondrial	FALSE	TRUE	TRUE
Anogam_AGAP002106	-0.158134850804537	0.434577300616651	-0.363881985046501	0.715946137659472	0.923767040515074	Female vs Male Oenocytes	Female Oenocytes	79.9183	Male Oenocytes	91.0759	xeroderma pigmentosum group C-complementing protein	FALSE	FALSE	FALSE
Anogam_AGAP002107	-0.579579945398519	0.205802550815435	-2.8161941778763	0.00485962851273683	0.0603891410713771	Female vs Male Oenocytes	Female Oenocytes	2650.82	Male Oenocytes	4067.95	calcyclin binding protein	FALSE	FALSE	FALSE
Anogam_AGAP002108	-0.564808647059955	0.344846211534369	-1.63785661018829	0.101451609109714	0.397371660623731	Female vs Male Oenocytes	Female Oenocytes	142.403	Male Oenocytes	216.448	dual specificity phosphatase	FALSE	FALSE	FALSE
[truncated: 11,221 more rows]
